# Supplementary material for: Single-nucleus multi-omic profiling of polyploid heart nuclei identifies fusion-derived cardiomyocytes in the human heart.
Source: Research Square preprint supplement (doi:10.21203/rs.3.rs-4414468/v1), 2024-05-30
Supplement: Supplementary file 1 [file 0c5b8a0f6531cbf4a4866ce7.xlsx]

## Sheet: Sheet1
Sample ID	Total	sc QC filtered	Singlets	Doublets	Doublet percentage	Data type
S1-2n	3749	3157	2947	210	0.0665	multiome
S1-4n	1700	1513	1414	99	0.0654	scRNA
S1-all	9016	7073	6597	476	0.0673	scRNA
S2-2n	4684	3946	3682	264	0.0669	scRNA
S3-all	1904	1017	951	66	0.0649	multiome
S4-all	6104	5405	5034	371	0.0686	scRNA
S5-all	4975	4059	3795	264	0.065	scRNA
S6-all	3957	3308	3089	219	0.0662	scRNA
S7-all	7478	6529	6087	442	0.0677	scRNA
S8-6n	3494	2961	2765	196	0.0662	multiome
S8-all	1838	1314	1233	81	0.0616	multiome
S9-all	6554	5907	5501	406	0.0687	scRNA
S10-2n	14398	8043	7508	535	0.0665	multiome
S10-4n	12002	4794	4590	204	0.0636	multiome
S10-6n	3768	2436	2355	141	0.066	multiome
S10-all	2336	1565	1467	98	0.0626	scRNA
Singlet				59015
2n				14137
4n				6004
6n				5120
