# Supplementary material for: Single-nucleus multi-omic profiling of polyploid heart nuclei identifies fusion-derived cardiomyocytes in the human heart.
Source: Research Square preprint supplement (doi:10.21203/rs.3.rs-4414468/v1), 2024-05-30
Supplement: Supplementary file 2 [file 7bb9a5eeb5225bb455ca7954.xlsx]

## Sheet: Supplementary table6A1
Table 6A1. Biological pathways upregulated in 4n vs 2n ATAC seq data
Biological pathways	Description	genome_fraction	observed_region_hits	fold_enrichment	p_value	p_adjust	mean_tss_dist	observed_gene_hits	gene_set_size	fold_enrichment_hyper	p_value_hyper	p_adjust_hyper	hit_genes
Metabolic processes	negative regulation of cellular metabolic process	0.043473	120	2.76033	0	0	7871	117	2163	1.64291	8.3595021127536e-08	7.07365869686459e-05	PASK|CDK5RAP1|BCL6|ARID5B|XRN1|LDLR|ATXN1|VDAC1|PCGF6|ATP1A1|GNL3L|RING1|LRP1|IKZF4|CDC6|NFIC|PAIP2B|LIG3|DBI|RTN2|ZBTB42|CDC73|GPS2|ZNF205|ZNF440|NR1D2|HBEGF|PPARGC1B|NR2C2|DFFA|RELA|JUND|SPDEF|PEX14|CAV1|GFI1B|TSC1|BCL3|SNAI1|PIF1|ZBTB16|PTBP2|EFNA1|VDR
	negative regulation of nitrogen compound metabolic process	0.0460966	121	2.62492	0	0	7908	119	2309	1.56533	7.78443831284115e-07	0.000362288	CDK5RAP1|SNTA1|BCL6|ARID5B|XRN1|LDLR|ATXN1|PCGF6|GNL3L|RING1|LRP1|IKZF4|CDC6|NFIC|PAIP2B|LIG3|DBI|RTN2|ZBTB42|CDC73|GPS2|ZNF205|ZNF440|NR1D2|HBEGF|BANF1|PPARGC1B|NR2C2|DFFA|RELA|JUND|SPDEF|PEX14|CAV1|GFI1B|TSC1|BCL3|SH3RF1|SNAI1|PIF1|ZBTB16|PTBP2|EFNA1|VD
	negative regulation of metabolic process	0.0580407	147	2.5327	0	0	8209	144	2916	1.49989	5.66154314318723e-07	0.000312588	PASK|CDK5RAP1|SNTA1|BCL6|ARID5B|XRN1|LDLR|ATXN1|ASXL3|VDAC1|PCGF6|ATP1A1|GNL3L|RING1|LRP1|IKZF4|CDC6|NFIC|PAIP2B|LIG3|DBI|RTN2|ZBTB42|CDC73|GPS2|ZNF205|ZNF440|NR1D2|HBEGF|LMNA|BANF1|PPARGC1B|NR2C2|DFFA|RELA|JUND|LSM4|SPDEF|PEX14|CAV1|GFI1B|TSC1|BCL3|SH3RF
	regulation of cellular catabolic process	0.0152006	45	2.96041	3.03584268834811e-10	1.97178696364424e-08	7069	43	761	1.7162	0.000475002	0.0465402	RUFY4|LDLR|VDAC1|SPTLC1|CHFR|SMURF1|DFFA|EXOC8|CAV1|TSC1|SH3RF1|LRPPRC|MAP1A|FOXK2|CDK5R1|ATP6V1E2|DESI1|OPTN|RC3H1|IGF2BP2|SLC11A1|EXOSC3|DCP2|TRIM32|CSNK2A1|ZFP36L1|FOXK1|ZYG11B|RUBCN|PIAS1|MFSD8|CNOT8|CAV3|PRKAA1|ABL2|MAGEF1|UBE2K|FBXO22|FASTKD2|PRKCA|
	nuclear-transcribed mRNA catabolic process	0.00234576	12	5.11562	6.46656812008928e-06	0.000234206	10302	10	117	2.59596	0.00535972	0.229109	XRN1|LSM4|XRN2|RC3H1|EXOSC3|DCP2|ZFP36L1|CNOT8|DXO|NCBP1
Signaling Pathways	regulation of Ras protein signal transduction	0.00440394	13	2.95191	0.000640814	0.0124762	6714	13	189	2.08913	0.0101107	0.306315	BCL6|RDX|SGSM3|NET1|ARFGEF2|LRRD1|ARRB1|GPR17|ARFGEF1|HEG1|GPR35|ARAP3|ABL2
cell-cell adhesion	cell adhesion	0.0316769	47	1.48373	0.00566222	0.06157	11336	48	1480	0.98506	0.564535	1	NLGN2|BCL6|RDX|CDH2|NPHP4|CDHR2|FAT1|PTPN23|FAM107A|TRPM7|RELA|CAV1|TSC1|ADGRE5|CDHR4|ZBTB16|EFNA1|PLXNC1|RELL2|CDK5R1|TGFBR2|ILK|ITGB3|HSPH1|OBSCN|RC3H1|ITGAV|COL7A1|LIMS2|MYBPC3|SPI1|PARVB|PPP1R12A|SORBS1|NCK2|DMTN|ZFP36L1|CRKL|EZR|MELTF|EFNA5|AP1AR|ABL
cell morphogenesis	endomembrane system organization	0.0113155	22	1.94424	0.00296051	0.0390871	6489	22	555	1.20396	0.214987	0.969994	LEMD3|OSBPL2|SPTBN5|LMNA|BANF1|ARFGEF2|EXOC8|FHDC1|CAV1|DTNBP1|RAB2B|RTN4|SNAPIN|OPTN|REEP5|ZNF385A|ARFGEF1|CASQ1|TMEM9|CAV3|VPS37D|AQP11|PRKCA|SYP
	cell morphogenesis	0.0231492	50	2.1599	6.12910822317403e-07	2.55828427539479e-05	9200	49	995	1.49574	0.00361834	0.185052	BCL6|RDX|CDH2|FAT1|NRN1L|STRIP1|NEK3|SMURF1|TNIK|EFNA1|VDR|MAP1S|MAP1A|PLXNC1|DTNBP1|CAMK2B|CDK5R1|ILK|ITGB3|SLC39A3|RTN4|ITGAV|LIMS2|AFG3L2|SPI1|PARVB|SLIT2|KIDINS220|ADNP|HPRT1|ZNF385A|VLDLR|KIF5B|HEG1|DMTN|SDC2|ACTR2|CRKL|ZMYM3|EZR|MELTF|EFNA5|P2RY1|AP
	regulation of growth	0.0129317	31	2.39722	1.19906907434242e-05	0.000408825	9842	31	591	1.59315	0.00792039	0.291615	BCL6|FLVCR1|CDHR2|NDRG3|NET1|CDC73|FAM107A|HBEGF|SMURF1|MEAF6|TGFBR2|AVP|PRDM11|RPS6KA1|RTN4|LTBP4|AFG3L2|SLIT2|ADNP|CGA|TRIM32|CSNK2A1|DUSP6|CRKL|EZR|PTCH2|EFNA5|OSGIN2|CAV3|PTK6|BDNF|NCBP1
	regulation of cell size	0.00401926	10	2.48802	0.00825489	0.0800629	5852	10	181	1.67805	0.0771598	0.759291	RDX|SMURF1|TSC1|RTN4|PRR16|ADNP|EFNA5|CAV3|AQP11|BDNF
	skeletal system morphogenesis	0.00439269	6	1.3659	0.27863	0.663481	6190	6	220	0.828346	0.734636	1	FLVCR1|ARID5B|PPARGC1B|TGFBR2|SLC39A3|THBS3
Transportation	cytosolic transport	0.00322578	11	3.41003	0.000516209	0.0105266	5084	10	156	1.94697	0.0341082	0.529175	RDX|PTPN23|TBC1D10A|KIF5B|ACTR2|EZR|YKT6|AP1AR|EPS15|HEATR5B
	protein secretion	0.00716169	14	1.95484	0.0149305	0.119908	6677	14	338	1.25804	0.226799	0.976183	NLGN2|MYOM1|PTPN23|ADCY5|RAB13|SLC16A1|TVP23A|ICA1|DMTN|EZR|GCK|EFNA5|PCSK5|SIRT6
	mononuclear cell differentiation	0.00941445	12	1.27464	0.238157	0.612438	14788	12	466	0.782129	0.84316	1	BCL6|GPS2|TSC1|BCL3|SH3RF1|ZBTB16|TGFBR2|PLCL2|RC3H1|SPI1|ZFP36L1|NDFIP1
Replication	DNA replication	0.0052891	14	2.64695	0.00113826	0.019476	13748	12	277	1.31578	0.204817	0.957757	CHAF1A|BCL6|CARM1|CDC6|NFIC|LIG3|MEAF6|PIF1|REV3L|DNAJC2|HMGA1|MCM9
Response to stress	response to hypoxia	0.00598314	13	2.17277	0.00844053	0.081414	7842	12	280	1.30169	0.21487	0.969994	CYP1A1|LMNA|JUND|CAV1|TGFBR2|NPEPPS|HIF1AN|ZFP36L1|CAV3|PRKAA1|STOX1|VHL
	response to oxygen levels	0.00676526	14	2.0694	0.00955966	0.0890704	7302	13	316	1.24951	0.244645	0.998238	CYP1A1|LMNA|JUND|CAV1|TSC1|TGFBR2|NPEPPS|HIF1AN|ZFP36L1|CAV3|PRKAA1|STOX1|VHL
	regulation of wound healing	0.00280817	4	1.42442	0.30982	0.707682	7812	4	129	0.941789	0.617544	1	HBEGF|CAV1|ARFGEF1|DMTN

## Sheet: Supplementary Table6A2
Table 6A2. Biological pathways downregulated in 4n vs 2n ATAC seq data
Biological Pathways	Description	genome_fraction	observed_region_hits	fold_enrichment	p_value	p_adjust	mean_tss_dist	observed_gene_hits	gene_set_size	fold_enrichment_hyper	p_value_hyper	p_adjust_hyper	hit_genes
Metabolic processes	phosphate-containing compound metabolic process	0.0543946	57	1.0479	0.377363	1	23112	59	2641	1.03741	0.403158	1	DOCK3|HK3|TAF3|NCBP1|SLC22A13|PIGF|SOCS5|ELOVL1|KRAS|GPCPD1|DCLK2|IL3|CSF2|TRIO|NDUFA12|STRADB|FOXK1|PIK3CA|CBLB|CDK12|DLG3|RASGRP1|BTRC|GNPTAB|GDF6|RANBP2|MAP4K5|BMP5|SASH1|TRIB3|PPP2CA|RYK|ABHD6|TRIM6|SLC35B3|SGK3|AGPAT4|NME5|TOM1L1|FGF7|TAF9|ATP6V1A|TE
	positive regulation of RNA metabolic process	0.0363696	33	0.90735	0.738459	1	27693	34	1792	0.881064	0.801106	1	SMAD9|TAF3|GATAD2A|SF3B5|NCBP1|TRIM44|ZNF585A|NCOA2|MED13|GIGYF2|FOXK1|CDK12|ALX4|BTRC|TESC|GDF6|BMP5|PGR|HNF4G|WNT8A|FGF7|TAF9|FOXM1|TEAD4|USF3|CELF4|NKX3-1|DR1|YES1|CREB5|SS18L1|UPF1|TFAP2C|PRR5L
	lipid metabolic process	0.027297	26	0.952487	0.626072	1	21999	27	1354	0.926001	0.686877	1	HSD3B1|MORC2|B4GALT4|SLC22A13|PIGF|SOCS5|ELOVL1|GPCPD1|NCOA2|NEU3|MID1IP1|DEGS2|CBR4|PIK3CA|GDPD2|P2RX1|CYP2C8|BMP5|TRIB3|PPP2CA|ABHD6|TYRP1|AGPAT4|GM2A|SDR16C5|PDE3A|DOLK
	regulation of protein metabolic process	0.049361	53	1.07372	0.31722	1	23646	53	2477	0.993611	0.540503	1	DOCK3|USP14|NCBP1|TM4SF20|BLID|SOCS5|KRAS|TRIM44|RDX|IL3|CSF2|GIGYF2|SERPINC1|STRADB|PIK3CA|CBLB|CDK12|DLG3|RASGRP1|P2RX1|DNAJB6|BTRC|GDF6|BMP5|SASH1|TRIB3|PPP2CA|ASPH|TRIM6|IFNGR1|ITM2C|CASP10|CASP8|PURA|ITM2B|TOM1L1|FGF7|TAF9|SERP1|SDR16C5|CELF4|NKX3-1|
Cellular organozation	actin cytoskeleton organization	0.0152484	20	1.31161	0.137373	1	28123	19	692	1.27501	0.169018	1	LMOD2|KRAS|FRMD3|RDX|AP1AR|PIK3CA|CALD1|GDPD2|DNAJB6|DAAM1|FGF7|PLEKHH2|ARHGEF17|XIRP2|FAT1|CDC42BPA|FRMD6|ARHGAP35|COBL
	cell-cell adhesion	0.0193919	24	1.23763	0.171635	1	26922	23	926	1.15341	0.270827	1	SOCS5|MMRN1|RDX|CLDN8|CD83|PIK3CA|TENM2|CBLB|NFKBIZ|DLG3|RASGRP1|DNAJB6|CD276|SELPLG|BMP5|CRB1|PKP4|EXT1|FAT1|CDH5|YES1|ADORA2A|LRRC4C
	cytoskeleton organization	0.0292529	39	1.3332	0.0460212	1	25062	37	1420	1.20998	0.135205	1	LMOD2|SLC39A12|MAPRE2|KRAS|DCLK2|FRMD3|RDX|MID1IP1|AP1AR|PIK3CA|CALD1|GDPD2|DNAJB6|MPDZ|ANK2|DAAM1|STARD9|DAW1|CCDC65|FGF7|KRT82|MAP6D1|IQCG|PLEKHH2|CCDC69|KIAA1614|ARHGEF17|XIRP2|FAT1|CDC42BPA|CDH5|FRMD6|ARHGAP35|SENP6|CEP44|COBL|SDCCAG8
response to stress	cellular response to stress	0.0363749	39	1.07217	0.351385	1	25853	39	1854	0.976835	0.584112	1	SF3B5|USP14|MORC2|SOCS5|RBM11|TMEM117|GIGYF2|RRAGB|STRADB|AP5Z1|PIK3CA|UGGT2|RASGRP1|DNAJB6|PYROXD1|CHAF1B|GDF6|ASF1A|C14orf39|MNT|SASH1|TRIB3|MEIOC|STT3B|CLGN|NCCRP1|NME5|TAF9|SERP1|FOXM1|HP1BP3|NKX3-1|OMG|SPATA22|MMS22L|MORC3|UPF1|POLQ|PRR5L
	RNA processing	0.0162855	17	1.04387	0.462575	1	22952	17	919	0.859013	0.771478	1	SF3B5|BMS1|NCBP1|LSM5|RBM11|CDK12|ESF1|ELAC2|PPP2CA|RPP14|RPP30|TAF9|CELF4|RPS27|SNRPN|LSM7|PUS7
Cell cycle	positive regulation of transcription by RNA polymerase II	0.0247374	20	0.808494	0.858335	1	29620	21	1217	0.8013	0.877092	1	SMAD9|TAF3|NCBP1|ZNF585A|NCOA2|MED13|CDK12|ALX4|BMP5|PGR|HNF4G|WNT8A|TAF9|FOXM1|TEAD4|USF3|NKX3-1|DR1|YES1|SS18L1|TFAP2C
	regulation of cell cycle	0.0206844	23	1.11195	0.332512	1	29964	23	1066	1.00193	0.526219	1	ANAPC13|BRINP3|RDX|GIGYF2|FBXL17|CDK12|BTRC|MNT|PPP2CA|MEIOC|MYO16|TOM1L1|PKP4|FOXM1|NKX3-1|NCAPG|DR1|SPATA22|SMOC2|SENP6|PDE3A|CKS2|PPP2R3B

## Sheet: Supplementary Table 6B1
Table 6B1: Biological pathways upregulated in >4n vs 2n ATAC seq data
Biological Pathways	description	genome_fraction	observed_region_hits	fold_enrichment	p_value	p_adjust	mean_tss_dist	observed_gene_hits	gene_set_size	fold_enrichment_hyper	p_value_hyper	p_adjust_hyper	hit_genes
Metabolic processes	regulation of cellular catabolic process	0.0152006	70	4.61432	0	0	5240	65	761	2.32603	3.31494387495468e-10	3.28249974341257e-08	COMMD1|AKT1|MTMR3|PACSIN3|NUB1|FEZ1|PLEKHN1|GRSF1|PCID2|CLEC16A|WIPI1|HSF1|SYNCRIP|SAMD4B|PPP1R3B|EEF1A2|RYBP|MTCL1|DDA1|PLEKHF1|CIRBP|GTPBP1|SUFU|ULK1|CHMP4B|HSPB1|AGTPBP1|RBM38|BNIP3|CPT1A|TRIM8|AXIN1|PIK3R2|DDX49|PARN|RNF144A|ADRB2|PRKACA|RRAGC|ARIH1|F
	negative regulation of transcription by RNA polymerase II	0.0191103	72	3.77514	0	0	5857	69	934	2.01182	3.68301673603355e-08	2.74252158232002e-06	IRX2|ZNF749|GLI3|THRB|INSM1|LDB1|NCOR2|HSF1|ZNF692|SKI|DAB2IP|KLF7|MEPCE|ZNF131|RYBP|TBX6|DRAP1|KCNIP3|SUFU|GATAD2A|FOXM1|TMBIM6|DLX4|PER3|JUND|MAFF|ZNF205|IRF2BP2|LMCD1|KMT5A|WWC2|CRY1|NKX2-5|JUN|NR2C2|CNBP|NR1H3|ATF3|HES1|CALR|VEGFA|DNAJB1|KANK2|FOXO1|H
	negative regulation of macromolecule biosynthetic process	0.0297617	110	3.70343	0	0	6622	106	1473	1.9597	3.25344196028254e-11	4.14836133785067e-09	IRX2|WNT11|ZNF749|BEND6|GLI3|THRB|TLE3|INSM1|PLEKHN1|LDB1|NCOR2|FLNA|SRSF2|IRF1|HSF1|ZNF692|SKI|SYNCRIP|SAMD4B|DAB2IP|KLF7|MEPCE|ZNF131|RYBP|TBX6|DRAP1|CIRBP|KCNIP3|SUFU|GATAD2A|FOXM1|TMBIM6|DLX4|PER3|JUND|CRYAB|KAT7|MAFF|ZSCAN10|ZNF205|IRF2BP2|LMCD1|KMT5
	protein catabolic process	0.018908	69	3.65656	0	0	6512	68	982	1.88575	5.0451110089611e-07	3.10992670671589e-05	COMMD1|AKT1|ASCC2|RNF122|PACSIN3|NUB1|LAPTM4B|FBXO31|FLNA|DDI2|SIAH1|CUL4A|FBXL18|DAB2IP|UBB|DNAJB12|EEF1A2|CBL|GET4|RYBP|RIPK1|DDA1|DPP7|SUFU|ARRDC1|XBP1|CHMP4B|AGTPBP1|WDR91|BNIP3|GPC1|AXIN1|BFAR|CALR|RNF144A|PRKACA|RNF114|EGLN2|FEM1C|AZIN2|TMUB2|ANKRD9
Cell morphogenesis	cell morphogenesis	0.0231492	56	2.42394	2.89368795591827e-09	7.12551520997017e-08	7290	54	995	1.47794	0.00297907	0.0520247	TSKU|STRIP2|GLI3|FEZ1|KIF5B|FBXO31|FLNA|SIAH1|CAMK2B|MYH9|ZDHHC17|UPK3A|NTN4|IGSF9|MAP1B|FGD1|DAB2IP|TCTN1|UBB|KLF7|PLXNB2|SART3|SEMA4B|MERTK|FMNL3|GORASP1|EDN2|EPHA7|ULK1|FZD4|ST6GAL1|CDKL5|LIMK1|UNC13D|ARHGEF28|ILK|EEF2K|PACSIN2|HES1|CALR|VEGFA|APLP2|CR
	embryonic morphogenesis	0.0121871	33	2.71321	4.78466871456362e-07	8.54811831001117e-06	3950	28	599	1.27297	0.116028	0.492022	IRX2|WNT11|GLI3|MESP2|GRSF1|AHDC1|LDB1|LRP5L|LRIG1|SKI|NCOA1|TCTN1|PLXNB2|TBX6|SUFU|NPHP3|IFT140|IRX5|NKX2-5|AXIN1|HES1|PRKACA|DLD|IFT57|HIF1A|HS2ST1|IRX3|ZEB1
	localization within membrane	0.0134859	33	2.45191	4.02308045033273e-06	5.70835866336845e-05	7814	33	643	1.39762	0.0347449	0.242979	COMMD1|AKT1|KIF5B|COX18|HPS6|FLNA|ZDHHC11B|ADAM10|GET4|MTCL1|PLEKHF1|KCNIP3|GORASP1|AP4M1|CHMP4B|ACTN2|EMC6|GPC1|RABGEF1|PIK3R2|CRK|MYO1C|SLC5A3|PACS2|CDH2|DNM2|PKDCC|RAB40C|RAB8B|RAB3A|PPP1R9B|RAB26|CDK5|EHD4
	developmental growth	0.0141813	33	2.33168	1.10519914942042e-05	0.00014268	4163	31	618	1.36603	0.0509249	0.297184	TSKU|AKT1|WNT11|AKAP13|GLI3|POR|MAP1B|SKI|MAPK11|SEMA4B|EDN2|EPHA7|ULK1|G6PD|CDKL5|LIMK1|WWC2|NKX2-5|SGCA|PLAG1|GPAT4|ADRB2|VEGFA|ADAM15|LGMN|DNM2|PKDCC|YY1|INSR|CDK5|DUSP10|SPAG9
Cell differentiation	mononuclear cell differentiation	0.00941445	31	3.29941	1.63576685530131e-08	3.61656006868043e-07	6612	30	466	1.75316	0.00230831	0.0435489	GPR68|GLI3|PIK3CD|PCID2|MYH9|IRF1|DHRS2|LFNG|FOS|MERTK|XBP1|KAT7|IRF2BP2|JUNB|JUN|SMARCD3|IL12RB1|PIK3R2|VEGFA|RELB|HMGB1|HDAC4|HDAC5|CEBPB|NRARP|YY1|KLHL25|SMARCC2|ZEB1|DUSP10
	epithelial cell differentiation	0.0139784	31	2.22215	4.86452134855764e-05	0.000505346	4836	30	687	1.18919	0.188417	0.627429	AKT1|WNT11|CES1|PTCH2|THRB|INSM1|PODXL|BCCIP|UPK3A|MAP1B|KLF7|MYO1E|KRT84|MAFF|NKX2-5|JUN|CPT1A|HES1|GPAT4|VEGFA|CDH2|HIF1A|SPDEF|ZFP36|CEBPB|ONECUT2|CCND1|SLC4A7|IL6ST|ZEB1
cell migration	ameboidal-type cell migration	0.00942969	31	3.29408	1.69556917395397e-08	3.73989523013354e-07	8163	26	420	1.68582	0.00713112	0.0941509	AKT1|WNT11|TMEM201|PIK3CD|AQP1|MYH9|NR4A1|DAB2IP|SEMA4B|EDN2|HSPB1|RRAS|ILK|JUN|CALR|VEGFA|KANK2|CDH2|HMGB1|IRS2|HIF1A|LGMN|HDAC5|AAMP|YTHDF3|DUSP10
	positive regulation of cell adhesion	0.0097793	31	3.17631	3.78076101537062e-08	7.96112427629081e-07	7515	30	468	1.74567	0.00245911	0.0451773	AKT1|GLI3|PODXL|LDB1|FLNA|FSTL3|COL26A1|XBP1|RRAS|UNC13D|ILK|SMARCD3|IL12RB1|PIK3R2|HES1|TFRC|CALR|VEGFA|CD274|CRK|TNFRSF13C|HMGB1|DNM2|POLDIP2|NID1|IL6ST|KLHL25|SMARCC2|ADAM19|DUSP10|RSU1
Transportation	regulation of secretion	0.01274	31	2.43816	8.68391495478793e-06	0.000114815	8267	30	598	1.36618	0.0540082	0.310698	GPR68|CES1|AQP1|ABCG1|LRP5L|SYT13|KLF7|MYO18A|SPX|MIDN|XBP1|KCNJ11|PLA2G6|UNC13D|CRY1|TRH|RABGEF1|CPT1A|NR1H3|MAOB|CBARP|MPC2|FOXO1|IRS2|HIF1A|PNKD|RAB8B|RAB3A|RAB26|CDK5|CHRNA6
	ion homeostasis	0.0130441	31	2.38131	1.35932296221331e-05	0.000171212	5002	31	611	1.38168	0.0450435	0.281386	COMMD1|SLC12A7|COX19|FLNA|SLC25A37|UPK3A|ISCU|GRINA|SPX|WNK2|TMBIM6|KCNH2|EDN2|BNIP3|TNNI3|FTL|KCTD7|TFRC|CALR|PRKACA|PACS2|ANKRD9|HRC|SLC41A1|HIF1A|TMEM199|WFS1|JSRP1|NEO1|SLC4A7|BOLA2B
	inorganic cation transmembrane transport	0.0167792	31	1.85122	0.00103993	0.00701936	3556	31	771	1.09495	0.327342	0.752781	COMMD1|SLC12A7|AQP1|FLNA|SLC25A37|ZDHHC17|SLC20A1|ISCU|WNK2|KCNIP3|TMBIM6|KCNH2|KCNJ11|G6PD|ACTN2|SESTD1|PLA2G6|CACNA1D|GPR35|CBARP|PRKACA|KCNK6|HRC|KLHL24|SLC41A1|DNM2|SLC25A4|JSRP1|SLC4A7|PKD1|CDK5
Response to stress	response to oxygen levels	0.00676526	30	4.4433	3.28634897073243e-11	9.89946155973382e-10	6678	28	316	2.413	1.82728168673929e-05	0.000806082	AKT1|PLEKHN1|AQP1|HSF1|CBL|FOS|HIF3A|TMBIM6|JUND|CRYAB|BNIP3|MALAT1|EEF2K|CPEB2|TFRC|VEGFA|EGLN2|SLC2A8|RWDD3|FOXO1|MPL|ADAM15|HIF1A|CPEB4|TMEM199|STUB1|ALAD|DDAH1
	response to hypoxia	0.00598314	24	4.01931	1.9395919093057e-08	4.24793446866294e-07	5952	22	280	2.13969	0.00072909	0.018097	PLEKHN1|AQP1|HSF1|FOS|HIF3A|TMBIM6|JUND|CRYAB|BNIP3|MALAT1|CPEB2|TFRC|VEGFA|EGLN2|SLC2A8|RWDD3|MPL|ADAM15|HIF1A|STUB1|ALAD|DDAH1
	cellular response to chemical stress	0.00693385	24	3.46822	2.7614837505574e-07	5.17180900406203e-06	4921	20	323	1.68622	0.0167111	0.157596	AKT1|AQP1|HSF1|DHRS2|PYROXD1|FOS|RIPK1|G6PD|HSPB1|BNIP3|JUN|RCSD1|CPEB2|RELB|OSER1|FOXO1|HSPA1A|HIF1A|SETX|GLRX2
	regulation of cytokine production	0.0142927	33	2.3135	1.28968784062211e-05	0.000163103	10194	29	705	1.1202	0.291101	0.713607	TSKU|WNT11|PIK3CD|MAVS|LAPTM4B|POLR3B|NFKBIL1|IRF1|MAPK11|RIPK1|MERTK|XBP1|HSPB1|RABGEF1|IL12RB1|ERBIN|CD274|RELB|HMGB1|HSPA1A|HIF1A|TLR3|ZFP36|IL1R1|CEBPB|AGPAT2|CIDEA|YY1|IL6ST|OTUD5

## Sheet: Supplementary Table6B2
Table 6B2 Biological pathways downregulated in >4n vs 2n ATAC seq data
Biological Pathways	Description	genome_fraction	observed_region_hits	fold_enrichment	p_value	p_adjust	mean_tss_dist	observed_gene_hits	gene_set_size	fold_enrichment_hyper	p_value_hyper	p_adjust_hyper	hit_genes
Cell cycle	cell cycle	0.0332441	48	1.44387	0.00837289	1	28933	48	1698	1.35278	0.0216347	1	PYHIN1|MYO16|C14orf39|EPB41L2|SMOC2|MNAT1|ING2|OSGIN2|SPATA22|SENP6|EXOC8|HMGA2|BCAT1|SKA1|FOXM1|USP9X|PKP4|CHAF1B|AHR|DYNLT1|TRIM21|GIGYF2|AHCTF1|RHEB|CEP44|RDX|NCAPG|FBXL17|LIN9|CCDC69|STAMBP|STARD9|DR1|TOM1L1|BRINP3|SCRIB|NANOS2|PLCB1|LRP5|MSH2|TOPBP1|
	negative regulation of cell cycle	0.00680468	10	1.46958	0.149545	1	32413	10	366	1.3075	0.238187	1	MYO16|GIGYF2|TOM1L1|BRINP3|SCRIB|NANOS2|MSH2|TOPBP1|TERF2|DOT1L
	mitotic cell cycle	0.0172271	22	1.27705	0.149652	1	30037	22	892	1.18027	0.242481	1	MYO16|SMOC2|MNAT1|EXOC8|BCAT1|SKA1|FOXM1|DYNLT1|GIGYF2|RDX|NCAPG|FBXL17|STAMBP|TOM1L1|BRINP3|SCRIB|PLCB1|LRP5|MSH2|TOPBP1|SMARCC1|GPSM2
	regulation of cell cycle G1/S phase transition	0.00356026	6	1.68527	0.150104	1	38644	6	183	1.569	0.185653	1	MYO16|MNAT1|GIGYF2|RDX|PLCB1|SMARCC1
Respose to stress	cellular response to DNA damage stimulus	0.0153523	23	1.49814	0.0393069	1	25812	24	828	1.38709	0.068825	1	PYHIN1|C14orf39|BCLAF1|NEIL3|NUAK1|MNAT1|CDKN2AIP|ING2|SPATA22|HMGA2|ZNF385A|ZBTB1|FOXM1|CHAF1B|UNG|GIGYF2|MORC2|MSH2|TOPBP1|TERF2|SMARCC1|DOT1L|MMS22L|PHLDA3
	regulation of cellular response to stress	0.0136622	18	1.31751	0.14809	1	24501	18	681	1.26488	0.185248	1	PYHIN1|BCLAF1|MAPK8IP3|ING2|RASGRP1|HMGA2|ZNF385A|FOXM1|SASH1|GDF6|DNAJB6|CRACR2A|NFE2L2|PLCB1|TERF2|SMARCC1|USP14|MYD88
Metabolic processes	carbohydrate metabolic process	0.0115024	19	1.65182	0.0254851	1	23193	19	571	1.59236	0.0328722	1	ST6GALNAC5|NCOA2|GCG|B4GALT4|CASD1|P2RY6|GALK2|SYNJ2|GM2A|B3GALNT1|SERP1|CHST9|CHID1|HS2ST1|POMC|LRP5|RENBP|GNPTAB|MST1
	organonitrogen compound biosynthetic process	0.0316125	39	1.23369	0.10898	1	25253	40	1613	1.18672	0.150681	1	ST6GALNAC5|PUS7|CELF4|AARSD1|ITM2B|UGGT2|HS6ST3|DEGS1|GFM2|MRPS16|B4GALT4|CERS6|DUT|YARS2|ODC1|ZNF385A|BCAT1|PURA|PIGF|GIGYF2|NCBP1|PSAT1|SRD5A3|MAP6D1|B3GALNT1|BHMT|NDUFA12|SERP1|EIF1AX|ZDHHC13|NFE2L2|NANOS2|CHST9|HS2ST1|NDUFB4|PLCB1|ADCY1|ATP6V1A|SPTSSB
	amide biosynthetic process	0.0147961	20	1.3517	0.112074	1	25672	20	795	1.20389	0.228669	1	ST6GALNAC5|PUS7|CELF4|AARSD1|DEGS1|GFM2|MRPS16|B4GALT4|CERS6|YARS2|ZNF385A|PURA|GIGYF2|NCBP1|SERP1|EIF1AX|NFE2L2|NANOS2|SPTSSB|ZC3H15
	negative regulation of protein metabolic process	0.02029	26	1.28142	0.123272	1	29536	26	1011	1.23068	0.163604	1	PUS7|CELF4|ITM2B|PSMF1|SVBP|CBLB|SDR16C5|PRR5L|SPINK14|PURA|SLIT2|USP9X|TRIM21|NGF|SOCS5|GIGYF2|DNAJB6|SNX3|NANOS2|SERPINC1|ANXA2|LRP5|SMARCC1|RENBP|USP14|PWWP2A
	regulation of phosphate metabolic process	0.0280475	22	0.784384	0.898854	1	25559	22	1341	0.785087	0.901933	1	TRIM6|GCG|CBLB|NUAK1|MNAT1|PRR5L|DLG3|RASGRP1|HMGA2|P2RY6|SLIT2|NGF|SOCS5|NCBP1|SASH1|GDF6|TOM1L1|CDH5|LRP5|MOB3A|CDK12|MST1
	RNA catabolic process	0.00530665	10	1.88443	0.0439113	1	18376	10	274	1.74652	0.0634764	1	ELAC2|SERBP1|PRR5L|LSM7|GIGYF2|NCBP1|RNASE2|NANOS2|NAF1|MYD88
	cellular macromolecule biosynthetic process	0.0207427	26	1.25345	0.146	1	25193	27	1083	1.19305	0.198729	1	ST6GALNAC5|PUS7|CELF4|AARSD1|ITM2B|UGGT2|HS6ST3|GFM2|MRPS16|B4GALT4|YARS2|ZNF385A|PURA|PIGF|GIGYF2|NCBP1|SRD5A3|MAP6D1|B3GALNT1|SERP1|EIF1AX|ZDHHC13|NANOS2|CHST9|HS2ST1|PLCB1|ZC3H15
	negative regulation of proteolysis	0.00658474	11	1.67053	0.0710157	1	33496	11	331	1.59034	0.0894258	1	PSMF1|SPINK14|USP9X|TRIM21|NGF|DNAJB6|SERPINC1|ANXA2|SMARCC1|RENBP|USP14
	mRNA metabolic process	0.0129943	18	1.38523	0.107783	1	29283	19	688	1.32157	0.134657	1	PUS7|CELF4|SNRPN|NCOA2|SRRM1|KHDRBS3|SERBP1|PRR5L|ZBTB1|LSM7|GIGYF2|NCBP1|NANOS2|NOVA2|ZCRB1|ANXA2|HNRNPA1L2|CDK12|MYD88
Signaling pathway	regulation of small GTPase mediated signal transduction	0.00711838	13	1.82626	0.0297554	1	29496	12	300	1.91419	0.024899	1	ARHGAP31|RASGRP1|LPAR1|COL3A1|ARHGEF17|FOXM1|SLIT2|NGF|RDX|DENND4A|STAMBP|RALGPS1
	Ras protein signal transduction	0.00770784	11	1.42712	0.155396	1	28087	11	346	1.52139	0.112237	1	RASGRP1|LPAR1|COL3A1|FOXM1|NGF|RIT1|RDX|DENND4A|STAMBP|RALGPS1|GPSM2
	G protein-coupled receptor signaling pathway	0.0230854	23	0.996299	0.535852	1	19043	25	1184	1.01044	0.507654	1	RGS7BP|CNTN2|ADGRF2|ADGRF4|GCG|OR13H1|DEFB1|PROK2|LPAR1|AKAP5|P2RY6|TAS2R9|TAS2R10|OXER1|DYNLT1|OR11H1|NPY2R|OR9A2|GPR22|CAMKMT|PLCB1|POMC|ADCY1|GPSM2|PDE3A
	mRNA splicing, via spliceosome	0.00533008	9	1.68853	0.0912238	1	29741	9	294	1.46494	0.164897	1	CELF4|SNRPN|SRRM1|KHDRBS3|LSM7|NCBP1|NOVA2|ZCRB1|HNRNPA1L2
Cellular organization	establishment of endothelial barrier	0.00109819	4	3.64237	0.0255312	1	28916	4	47	4.07274	0.0165814	1	RDX|CDH5|PLCB1|MYD88
	microtubule cytoskeleton organization	0.011882	16	1.34658	0.145855	1	23972	16	601	1.274	0.194772	1	CNTN2|SENP6|CCDC65|SKA1|CCDC39|DYNLT1|CEP44|MAP6D1|CCDC69|IQCG|MPDZ|STARD9|CDH5|DCLK2|GPSM2|SDCCAG8
	cell junction organization	0.0160204	13	0.811467	0.810357	1	32869	13	692	0.899004	0.690087	1	CNTN2|ROBO2|XIRP2|IL17A|PKP4|ANK2|RDX|MPDZ|ABHD17B|LRRC4C|CDH5|KIFC3|AMIGO3
