# Supplementary material for: Single-nucleus multi-omic profiling of polyploid heart nuclei identifies fusion-derived cardiomyocytes in the human heart.
Source: Research Square preprint supplement (doi:10.21203/rs.3.rs-4414468/v1), 2024-05-30
Supplement: Supplementary file 3 [file 87fea58908c18a003b32a4f0.xlsx]

## Sheet: Polyploid proportion
Nuclei in Single clade
	A	B	C	D	E	F	G	H	I
Diploid	63	18	30	1	2	26	1	1	1
Tetraploid	53	24	6	9	1	23	0	11	3
Hexaploid+	42	3	8	3	0	6	2	3	0
Before sensitivity correction
	# single-clade	# multi-clade	% multi-clade	Odds ratio (vs diploid)	P-value (vs diploid)
Diploid	143	1	0.007	N/A	N/A
Tetraploid	130	8	0.058	8.35	0.018
Hexaploid+	67	16	0.193	27.76	5.8e-7
After sensitivity correction
		Multi-clade sensitivity	% multi-clade	Odds ratio (vs diploid)	P-value (vs diploid)
Diploid		0.21	0.032	N/A	N/A
Tetraploid		0.46	0.126	3.89	0.003
Hexaploid+		0.3	0.634	19.52	<2.2e-16
