# Supplementary material for: Single-nucleus multi-omic profiling of polyploid heart nuclei identifies fusion-derived cardiomyocytes in the human heart.
Source: Research Square preprint supplement (doi:10.21203/rs.3.rs-4414468/v1), 2024-05-30
Supplement: Supplementary file 4 [file 96f5c2cb07ec3aacd0aed3a4.xlsx]

## Sheet: Supplimental Table 5A
Gene	p_val	avg_log2FC	pct.1	pct.2	p_val_adj	Chromosome
A1BG	0.0503151	0.00183484	0.002	0.001	1	chr-19
A1BG-AS1	0.00438297	0.00100291	0.006	0.002	1	chr-19
A1CF	0.00969773	0.00582569	0.008	0.004	1	chr-10
A2M	0.000225459	-0.0614209	0.19	0.219	1	chr-12
A2M-AS1	1.25e-08	0.0201401	0.091	0.061	0.000395299	chr-12
A2ML1	0.00161681	0.00733628	0.011	0.005	1	chr-12
A2ML1-AS1	7.67e-35	-0.0208542	0.004	0.045	2.43e-30	chr-12
A3GALT2	0.578189	-3.32e-06	0.004	0.004	1	chr-1
A4GALT	6.77e-80	0.125346	0.438	0.237	2.14e-75	chr-22
A4GNT	0.272957	0.00033326	0	0	1	chr-3
AAAS	4.65e-05	0.0270045	0.111	0.09	1	chr-12
AACS	3.36e-29	0.0474932	0.199	0.116	1.06e-24	chr-12
AADAC	0.0282912	0.000883304	0.001	0	1	chr-3
AADACL2	0.0575308	0.00153287	0.001	0	1	chr-3
AADACL2-AS1	3.7e-15	0.0190639	0.014	0.001	1.17e-10	chr-3
AADACL3	0.0575308	0.00205407	0.001	0	1	chr-1
AADACL4	0.794612	-0.000421877	0.001	0.001	1	chr-1
AADAT	0.811635	0.00447687	0.046	0.048	1	chr-4
AAGAB	6.71e-34	0.0673407	0.187	0.104	2.12e-29	chr-15
AAK1	1.75e-14	0.134328	0.926	0.753	5.54e-10	chr-2
AAMDC	1.32e-30	0.0441289	0.461	0.317	4.17e-26	chr-11
AAMP	0.546988	0.00464491	0.029	0.031	1	chr-2
AANAT	0.0122224	0.00379288	0.004	0.001	1	chr-17
AAR2	0.0107105	0.0122733	0.065	0.053	1	chr-20
AARD	0.0575308	0.000410927	0.001	0	1	chr-8
AARS	2.08e-46	0.0864425	0.188	0.09	6.57e-42	NA
AARS2	4.2e-06	0.0240586	0.065	0.045	0.132745	chr-6
AARSD1	1.51e-06	0.0229549	0.156	0.126	0.0478729	chr-17
AASDH	3.73e-12	0.0445051	0.221	0.17	1.18e-07	chr-4
AASDHPPT	0.000313504	0.0198376	0.15	0.129	1	chr-11
AASS	3.28e-80	0.147582	0.54	0.323	1.04e-75	chr-7
AATBC	0.234637	-1.25e-05	0.001	0	1	chr-21
AATF	2.67e-34	0.0733834	0.196	0.11	8.44e-30	chr-17
AATK	1.78e-07	0.0117502	0.069	0.044	0.00561873	chr-17
ABALON	0.731096	-0.000166814	0.001	0.001	1	chr-20
ABAT	4.73e-81	0.111347	0.274	0.115	1.5e-76	chr-16
ABCA1	2.05e-68	0.139513	0.458	0.271	6.48e-64	chr-9
ABCA10	4.28e-26	0.0439987	0.11	0.053	1.35e-21	chr-17
ABCA12	1.16e-12	0.0191598	0.017	0.003	3.66e-08	chr-2
ABCA13	2.71e-09	0.025367	0.025	0.01	8.57e-05	chr-7
ABCA2	1.21e-07	0.0150552	0.047	0.026	0.00381768	chr-9
ABCA3	1.67e-08	0.0270596	0.083	0.055	0.000528996	chr-16
ABCA4	0.00803163	0.00382868	0.005	0.002	1	chr-1
ABCA5	2.38e-65	0.129346	0.511	0.309	7.52e-61	chr-17
ABCA6	3.21e-06	-0.0177172	0.062	0.089	0.101648	chr-17
ABCA7	2.26e-19	0.0343165	0.077	0.035	7.14e-15	chr-19
ABCA8	9.68e-78	0.163395	0.429	0.246	3.06e-73	chr-17
ABCA9	6.08e-09	0.0066356	0.034	0.016	0.000192361	chr-17
ABCA9-AS1	0.00533792	0.010282	0.011	0.006	1	chr-17
ABCB1	0.02099	0.00467472	0.015	0.01	1	chr-7
ABCB10	4.16e-18	0.046123	0.236	0.17	1.31e-13	chr-1
ABCB11	0.00490804	0.00229026	0.009	0.004	1	chr-2
ABCB4	0.00106617	-0.0121524	0.263	0.229	1	chr-7
ABCB5	2.36e-05	0.00950454	0.011	0.004	0.746933	chr-7
ABCB6	5.41e-06	0.0173959	0.043	0.026	0.171261	chr-2
ABCB8	4e-23	0.0815451	0.242	0.17	1.26e-18	chr-7
ABCB9	4e-09	0.0223536	0.078	0.05	0.00012662	chr-12
ABCC1	7.14e-140	0.214345	0.631	0.328	2.26e-135	chr-16
ABCC10	4.4e-13	0.0383862	0.137	0.093	1.39e-08	chr-6
ABCC11	0.00342765	0.0108141	0.011	0.005	1	chr-16
ABCC12	0.00999779	0.00411766	0.003	0.001	1	chr-16
ABCC2	9.8e-09	0.0103345	0.018	0.006	0.00030994	chr-10
ABCC3	0.000239987	0.00810217	0.008	0.003	1	chr-17
ABCC4	5.6e-24	0.0424276	0.061	0.021	1.77e-19	chr-13
ABCC5	5.69e-115	0.291875	0.77	0.459	1.8e-110	chr-3
ABCC5-AS1	4.03e-07	-0.00832886	0.01	0.024	0.0127523	chr-3
ABCC6	0.00355113	-0.00183924	0.012	0.02	1	chr-16
ABCC8	8.49e-08	-0.0267916	0.069	0.102	0.00268595	chr-11
ABCC9	2.69e-15	0.0731454	0.671	0.442	8.49e-11	chr-12
ABCD2	3.12e-33	0.0758379	0.261	0.163	9.88e-29	chr-12
ABCD3	1.62e-107	0.227728	0.581	0.33	5.13e-103	chr-1
ABCD4	0.128727	0.0129407	0.127	0.121	1	chr-14
ABCE1	0.000792823	0.0149066	0.143	0.124	1	chr-4
ABCF1	3.65e-06	0.0430198	0.136	0.11	0.115306	chr-6
ABCF2	0.000253262	0.0178605	0.059	0.043	1	chr-7
ABCF3	0.00528963	0.00275285	0.072	0.09	1	chr-3
ABCG1	0.0293406	-0.00257912	0.155	0.141	1	chr-21
ABCG2	0.626474	0.0125489	0.113	0.114	1	chr-4
ABCG4	0.704467	0.000441995	0.004	0.004	1	chr-11
ABCG5	0.372956	0.00355131	0.004	0.003	1	chr-2
ABCG8	0.389302	-0.000655446	0.003	0.002	1	chr-2
ABHD1	7.86e-06	0.0200975	0.044	0.028	0.248666	chr-2
ABHD10	9.94e-08	0.036355	0.15	0.118	0.00314478	chr-3
ABHD11	0.00287188	-0.00238438	0.014	0.023	1	chr-7
ABHD12	8.44e-29	0.0627381	0.272	0.179	2.67e-24	chr-20
ABHD12B	0.00327574	0.00464019	0.004	0.001	1	chr-14
ABHD13	3.04e-12	0.0465752	0.153	0.11	9.62e-08	chr-13
ABHD14A	4.97e-11	-0.00903719	0.015	0.037	1.57e-06	chr-3
ABHD14B	0.00443065	-2.06e-07	0.051	0.067	1	chr-3
ABHD15	0.000909148	0.00637252	0.014	0.007	1	chr-17
ABHD15-AS1	0.000135124	-0.00635695	0.089	0.117	1	chr-17
ABHD16A	4.28e-09	0.0225701	0.075	0.047	0.000135309	chr-6
ABHD17A	2.4e-11	0.0217731	0.073	0.041	7.6e-07	chr-19
ABHD17B	3.76e-21	0.0503873	0.198	0.13	1.19e-16	chr-9
ABHD17C	0.00230653	0.0177499	0.097	0.081	1	chr-15
ABHD18	1.13e-82	0.242654	0.745	0.439	3.57e-78	chr-4
ABHD2	7.12e-121	0.281512	0.723	0.45	2.25e-116	chr-15
ABHD3	4.63e-20	0.0203451	0.324	0.23	1.47e-15	chr-18
ABHD4	0.0716671	0.0106216	0.042	0.035	1	chr-14
ABHD5	1.86e-08	0.0299217	0.138	0.103	0.000589846	chr-3
ABHD6	0.214554	0.00629334	0.108	0.103	1	chr-3
ABHD8	0.99479	1.38e-05	0.055	0.056	1	chr-19
ABI1	4.08e-36	0.0740136	0.433	0.285	1.29e-31	chr-10
ABI2	6e-97	0.190362	0.608	0.344	1.9e-92	chr-2
ABI3	0.891982	-0.000752118	0.001	0.001	1	chr-17
ABI3BP	0.0666599	-0.0348208	0.125	0.139	1	chr-3
ABITRAM	0.455058	0.00874926	0.076	0.074	1	chr-9
ABL1	1.06e-109	0.235392	0.752	0.45	3.35e-105	chr-9
ABL2	4.33e-95	0.163218	0.482	0.267	1.37e-90	chr-1
ABLIM1	8.31e-06	0.0222492	0.998	0.991	0.262687	chr-10
ABLIM2	9.95e-75	0.129613	0.472	0.268	3.15e-70	chr-4
ABLIM3	3.08e-56	0.104512	0.423	0.259	9.76e-52	chr-5
ABO	1.15e-09	0.00840638	0.032	0.013	3.64e-05	chr-9
ABR	4.3e-105	0.223892	0.806	0.49	1.36e-100	chr-17
ABRA	0.00200251	-0.148795	0.242	0.252	1	chr-8
ABRACL	0.00208391	0.00354176	0.005	0.002	1	chr-6
ABRAXAS1	0.0237052	0.0158076	0.059	0.05	1	chr-4
ABRAXAS2	1.59e-24	0.063327	0.175	0.107	5.03e-20	chr-10
ABT1	0.807469	0.000545198	0.014	0.014	1	chr-6
ABTB1	0.187443	0.00563497	0.022	0.018	1	chr-3
ABTB2	8.99e-43	0.115978	0.631	0.428	2.84e-38	chr-11
AC000032.1	0.272957	0.000115043	0	0	1	NA
AC000036.1	1	0	0	0	1	NA
AC000050.1	0.272957	0.000330782	0	0	1	NA
AC000058.1	0.00195058	0.00272482	0.006	0.002	1	NA
AC000061.1	0.00448738	0.00542927	0.004	0.001	1	NA
AC000065.1	1.26e-07	-0.00919692	0.013	0.03	0.0040001	NA
AC000065.2	6.47e-05	0.00390781	0.018	0.008	1	NA
AC000068.1	0.113576	0.000181867	0.003	0.005	1	NA
AC000068.2	0.114181	-0.000317649	0	0.001	1	NA
AC000068.3	0.272957	0.000240032	0	0	1	NA
AC000072.1	0.82092	0.000523114	0.001	0.001	1	NA
AC000082.1	1	0	0	0	1	NA
AC000085.1	1.25e-14	0.0488217	0.109	0.067	3.95e-10	NA
AC000099.1	0.272957	0.000398746	0	0	1	NA
AC000113.1	2.19e-05	0.00532556	0.007	0.001	0.693791	NA
AC000120.1	2.47e-05	0.00597732	0.01	0.003	0.780419	NA
AC000123.1	1	0	0	0	1	NA
AC000124.1	0.0167649	0.0026413	0.002	0	1	NA
AC000372.1	0.000387569	0.00400156	0.004	0	1	NA
AC000403.1	1	0	0	0	1	NA
AC001226.1	0.0702109	-0.000151928	0.001	0.003	1	NA
AC002044.1	0.00242965	0.00194714	0.002	0	1	NA
AC002056.2	0.114181	-0.000247702	0	0.001	1	NA
AC002057.1	0.693338	-0.00274653	0.066	0.066	1	NA
AC002057.2	0.000857248	-0.0220016	0.333	0.287	1	NA
AC002059.1	0.0575308	0.000436186	0.001	0	1	NA
AC002064.1	2.63e-06	0.00748913	0.014	0.005	0.0830889	NA
AC002064.2	0.0010008	-0.00120798	0	0.003	1	NA
AC002066.1	5.03e-66	0.207663	0.731	0.48	1.59e-61	NA
AC002069.2	6.27e-07	0.0130743	0.014	0.004	0.0198336	NA
AC002070.1	4.94e-09	0.0235642	0.032	0.014	0.000156108	NA
AC002072.1	0.00041512	0.00903933	0.011	0.005	1	NA
AC002074.1	1.01e-05	0.00799048	0.005	0.001	0.318343	NA
AC002074.2	0.00722117	0.0029922	0.001	0	1	NA
AC002076.1	0.272957	0.000409812	0	0	1	NA
AC002091.1	0.120997	0.000519415	0	0	1	NA
AC002091.2	1	0	0	0	1	NA
AC002094.2	0.361881	-6.08e-05	0	0	1	NA
AC002094.4	0.0251711	0.00339207	0.005	0.003	1	NA
AC002101.1	0.0321918	0.00147056	0.001	0	1	NA
AC002115.1	0.272957	0.000627377	0	0	1	NA
AC002116.2	0.000606069	0.0101181	0.015	0.008	1	NA
AC002128.1	0.117925	0.000877393	0.002	0.001	1	NA
AC002128.2	0.0681241	-0.000354105	0	0.001	1	NA
AC002306.1	1	0	0	0	1	NA
AC002310.1	0.078714	0.00101043	0.009	0.013	1	NA
AC002310.2	0.742587	0.00248581	0.008	0.007	1	NA
AC002331.1	3.41e-05	0.00424561	0.005	0.001	1	NA
AC002347.1	0.0282912	0.000554606	0.001	0	1	NA
AC002347.2	1	0	0	0	1	NA
AC002351.1	0.00722117	0.0016048	0.001	0	1	NA
AC002375.1	3.31e-05	0.00504684	0.004	0	1	NA
AC002377.1	0.837351	-0.00427932	0.014	0.014	1	NA
AC002378.1	0.00370924	0.00213685	0.002	0	1	NA
AC002383.1	0.0841494	0.000990979	0.002	0.001	1	NA
AC002398.1	0.114181	-0.000251514	0	0.001	1	NA
AC002398.2	0.376672	0.00194048	0.008	0.006	1	NA
AC002401.1	0.579484	0.000142795	0.002	0.002	1	NA
AC002401.2	0.540096	0.000321913	0.001	0.001	1	NA
AC002401.3	0.0575308	0.000488614	0.001	0	1	NA
AC002407.1	1	0	0	0	1	NA
AC002428.1	0.120997	0.00044763	0	0	1	NA
AC002429.2	1.78e-28	-0.0429497	0.071	0.145	5.63e-24	NA
AC002451.1	1.5e-35	0.066375	0.167	0.086	4.73e-31	NA
AC002454.1	3.5e-06	0.00684387	0.009	0.002	0.110599	NA
AC002456.1	0.000370719	0.00788855	0.017	0.009	1	NA
AC002458.1	0.0157952	-0.000512343	0	0.001	1	NA
AC002460.1	1	0	0	0	1	NA
AC002460.2	5.16e-55	0.211362	0.746	0.531	1.63e-50	NA
AC002463.1	2.67e-32	-0.0965673	0.118	0.205	8.45e-28	NA
AC002465.1	0.512319	0.000518913	0.001	0	1	NA
AC002465.2	0.0413869	-0.000353899	0	0.001	1	NA
AC002467.1	0.38361	0.000368765	0.002	0.003	1	NA
AC002470.1	0.185387	-0.00029045	0.001	0.002	1	NA
AC002472.1	1.52e-06	0.00675809	0.006	0	0.0481227	NA
AC002480.1	0.031107	-0.00402233	0.013	0.018	1	NA
AC002480.2	1.49e-06	0.00269072	0.047	0.028	0.0472647	NA
AC002511.1	0.0942753	-0.000728259	0.001	0.003	1	NA
AC002511.2	0.0268991	0.00231384	0.003	0.001	1	NA
AC002519.1	3.6e-09	0.00892809	0.022	0.008	0.000113782	NA
AC002542.6	0.0575308	0.000375401	0.001	0	1	NA
AC002546.1	0.663847	0.000987034	0.003	0.002	1	NA
AC002550.1	0.795976	0.000347584	0.001	0.001	1	NA
AC002550.2	1	0	0	0	1	NA
AC002551.1	0.378992	-0.00149929	0.002	0.001	1	NA
AC002553.1	0.663076	0.00112097	0.014	0.015	1	NA
AC002553.2	0.00485631	0.00330286	0.006	0.003	1	NA
AC002558.2	9.76e-07	-0.00235731	0	0.006	0.0308574	NA
AC002558.3	0.0120761	0.00891962	0.041	0.032	1	NA
AC003001.1	0.120997	0.00113771	0	0	1	NA
AC003005.2	0.0667238	0.00141118	0.004	0.002	1	NA
AC003035.1	0.0229542	0.00156277	0.004	0.002	1	NA
AC003035.2	0.361881	-0.00055044	0	0	1	NA
AC003043.1	0.00191944	0.00201439	0.002	0	1	NA
AC003043.2	0.120314	0.000228624	0.001	0	1	NA
AC003044.1	0.000112952	0.00615866	0.004	0.001	1	NA
AC003070.2	1	0	0	0	1	NA
AC003077.1	0.032114	0.000882584	0.001	0	1	NA
AC003084.1	1	0	0	0	1	NA
AC003086.1	0.623629	0.00038949	0.003	0.003	1	NA
AC003092.1	0.00722117	0.00181323	0.001	0	1	NA
AC003092.2	0.0575308	0.00112568	0.001	0	1	NA
AC003093.1	0.214569	5.53e-05	0.004	0.003	1	NA
AC003101.1	1.22e-09	0.00838098	0.016	0.004	3.85e-05	NA
AC003101.2	0.957184	-0.000461114	0.001	0.001	1	NA
AC003102.1	0.30628	-0.00127914	0.008	0.01	1	NA
AC003659.1	0.334653	-7.71e-05	0.018	0.02	1	NA
AC003666.1	2.29e-06	0.0115797	0.018	0.007	0.0725149	NA
AC003681.1	0.159126	0.00330974	0.034	0.029	1	NA
AC003682.1	0.000494212	0.00865613	0.036	0.024	1	NA
AC003684.1	0.166874	0.00152192	0.001	0	1	NA
AC003685.1	1	0	0	0	1	NA
AC003688.2	0.0681241	-0.000399583	0	0.001	1	NA
AC003950.1	0.0282912	0.00110648	0.001	0	1	NA
AC003956.1	0.014594	-0.00184474	0.002	0.005	1	NA
AC003958.2	0.854024	-0.000213548	0	0	1	NA
AC003965.1	0.288844	-0.000351302	0.001	0.002	1	NA
AC003965.2	1	0	0	0	1	NA
AC003973.1	0.0660912	0.00181139	0.004	0.002	1	NA
AC003982.1	0.00461016	0.00182838	0.002	0	1	NA
AC003984.1	0.092661	0.00226691	0.001	0	1	NA
AC003986.1	1	0	0	0	1	NA
AC003986.2	1	0	0	0	1	NA
AC003986.3	1	0	0	0	1	NA
AC003988.1	1.14e-05	0.00598874	0.004	0	0.35951	NA
AC003991.1	0.000222337	0.00714723	0.013	0.006	1	NA
AC003991.2	1	0	0	0	1	NA
AC003992.1	0.808602	0.000550691	0	0.001	1	NA
AC004000.1	1	0	0	0	1	NA
AC004009.1	0.00461211	0.00218429	0.002	0	1	NA
AC004012.1	1	0	0	0	1	NA
AC004014.1	0.000522403	0.00283718	0.002	0	1	NA
AC004034.1	0.00792705	-0.00107876	0.008	0.014	1	NA
AC004039.1	2.42e-22	-0.0129799	0.014	0.051	7.66e-18	NA
AC004047.1	0.272957	0.000294164	0	0	1	NA
AC004052.1	7.68e-08	0.0110053	0.009	0.001	0.00243062	NA
AC004053.1	0.386434	0.0142088	0.029	0.027	1	NA
AC004054.1	0.00109852	-0.00199387	0.007	0.013	1	NA
AC004066.2	0.0575308	0.00120647	0.001	0	1	NA
AC004067.1	1	0	0	0	1	NA
AC004069.1	0.678979	0.00019573	0.002	0.002	1	NA
AC004076.2	0.757635	-0.0003553	0.007	0.008	1	NA
AC004083.1	1.16e-06	0.0241959	0.054	0.034	0.0366139	NA
AC004112.1	0.000351029	0.000319503	0.011	0.02	1	NA
AC004130.2	0.371296	0.000337896	0	0.001	1	NA
AC004148.1	0.646177	0.00113197	0.004	0.005	1	NA
AC004156.1	0.00132445	0.00236049	0.003	0	1	NA
AC004158.1	6.28e-08	0.011378	0.012	0.003	0.00198739	NA
AC004160.1	4.84e-14	0.0261676	0.027	0.007	1.53e-09	NA
AC004160.2	1	0	0	0	1	NA
AC004217.1	0.00063854	-0.00121706	0	0.003	1	NA
AC004221.1	1	0	0	0	1	NA
AC004223.2	1	0	0	0	1	NA
AC004223.4	0.272957	0.000655811	0	0	1	NA
AC004231.1	0.0102778	0.00319996	0.006	0.002	1	NA
AC004231.3	0.207219	0.0018017	0.004	0.002	1	NA
AC004232.1	1.77e-07	-0.0032182	0	0.008	0.0056038	NA
AC004233.1	0.0193809	-0.000591808	0.002	0.005	1	NA
AC004233.2	0.00163208	0.0065682	0.013	0.006	1	NA
AC004233.3	0.0133428	0.000289425	0.003	0.001	1	NA
AC004241.1	3.11e-05	-0.00178795	0.021	0.036	0.984943	NA
AC004241.2	1	0	0	0	1	NA
AC004241.3	0.00722117	0.000947789	0.001	0	1	NA
AC004241.4	1	0	0	0	1	NA
AC004253.1	2.65e-09	-0.00618037	0.012	0.03	8.39e-05	NA
AC004257.1	0.234553	0.00120776	0.001	0	1	NA
AC004263.1	0.0282912	0.000463485	0.001	0	1	NA
AC004263.2	0.450008	0.00129646	0.005	0.006	1	NA
AC004264.1	1	0	0	0	1	NA
AC004381.1	9.84e-05	0.00569308	0.007	0.002	1	NA
AC004448.2	0.00577188	0.00572526	0.013	0.008	1	NA
AC004448.3	1	0	0	0	1	NA
AC004461.2	0.0632909	0.000762876	0.009	0.006	1	NA
AC004464.1	0.120997	0.00049227	0	0	1	NA
AC004466.1	0.821191	5.41e-05	0.001	0.001	1	NA
AC004466.2	0.0282912	0.00107662	0.001	0	1	NA
AC004466.3	0.361881	-0.000153224	0	0	1	NA
AC004470.1	0.0620133	0.00153759	0.001	0	1	NA
AC004471.1	0.289728	0.00109238	0.004	0.003	1	NA
AC004471.2	0.0141965	0.000770675	0.001	0	1	NA
AC004477.1	0.356236	0.00108103	0.007	0.009	1	NA
AC004477.3	0.120997	0.000356737	0	0	1	NA
AC004485.1	0.000369502	0.00484447	0.004	0.001	1	NA
AC004490.1	0.0927488	0.000385366	0.001	0	1	NA
AC004492.1	0.0241184	0.0029859	0.007	0.004	1	NA
AC004494.1	9.64e-19	0.0262405	0.052	0.019	3.05e-14	NA
AC004522.3	0.00394496	0.00391143	0.003	0.001	1	NA
AC004522.4	0.0167787	0.00089836	0.002	0	1	NA
AC004522.5	0.127901	0.00369063	0.003	0.002	1	NA
AC004528.1	0.864278	-0.00109695	0.002	0.002	1	NA
AC004528.2	0.793797	0.000240738	0.001	0.001	1	NA
AC004540.1	0.267505	0.00390459	0.014	0.011	1	NA
AC004540.2	1	0	0	0	1	NA
AC004542.1	1	0	0	0	1	NA
AC004542.2	0.627888	-9.39e-05	0.002	0.002	1	NA
AC004549.1	1	0	0	0	1	NA
AC004551.1	0.000126064	0.0071373	0.007	0.002	1	NA
AC004554.2	0.0113619	0.00557312	0.006	0.003	1	NA
AC004556.3	0.0151988	0.00165673	0.002	0	1	NA
AC004584.1	0.162511	-0.000296982	0	0.001	1	NA
AC004584.3	4.38e-05	0.00859525	0.034	0.021	1	NA
AC004585.1	1	0	0	0	1	NA
AC004590.1	0.120997	0.00118962	0	0	1	NA
AC004593.1	1.6e-25	-0.0225174	0.018	0.062	5.08e-21	NA
AC004593.2	0.00509548	0.00166677	0.009	0.004	1	NA
AC004593.3	0.0637555	-3.72e-05	0.017	0.022	1	NA
AC004594.1	3.91e-16	-0.0168143	0.022	0.055	1.24e-11	NA
AC004596.1	0.128548	0.00268093	0.006	0.004	1	NA
AC004597.1	1	0	0	0	1	NA
AC004637.1	1	0	0	0	1	NA
AC004672.1	0.00955433	-0.000798745	0.002	0.006	1	NA
AC004672.2	0.000388027	0.00208732	0.004	0	1	NA
AC004674.1	1	0	0	0	1	NA
AC004687.1	1	0	0	0	1	NA
AC004690.2	0.00128162	0.00369077	0.003	0	1	NA
AC004691.1	0.0575308	0.000441935	0.001	0	1	NA
AC004702.1	0.11783	0.0013962	0.002	0.001	1	NA
AC004704.1	0.844758	-0.00673766	0.042	0.041	1	NA
AC004706.1	1	0	0	0	1	NA
AC004706.3	0.00772997	0.00238926	0.004	0.001	1	NA
AC004765.1	0.100023	-0.000285855	0.002	0.004	1	NA
AC004771.1	0.330909	0.000443269	0.001	0.001	1	NA
AC004771.2	0.255429	0.00157388	0.002	0.001	1	NA
AC004771.3	0.0697796	-0.000372964	0	0.002	1	NA
AC004771.4	0.0807166	-0.000405656	0.002	0.004	1	NA
AC004771.5	0.511827	0.000357012	0.001	0	1	NA
AC004784.1	1.82e-07	0.0110304	0.01	0.002	0.00574452	NA
AC004797.1	2.51e-13	-0.00952759	0.029	0.062	7.93e-09	NA
AC004801.3	0.0509798	0.000385572	0.003	0.005	1	NA
AC004801.4	0.0469381	-0.000413599	0.001	0.003	1	NA
AC004801.5	0.0575308	0.000421749	0.001	0	1	NA
AC004801.6	1	0	0	0	1	NA
AC004803.1	2.17e-06	0.0179943	0.036	0.02	0.068601	NA
AC004812.2	4.82e-05	-0.00356492	0.009	0.019	1	NA
AC004816.1	0.128766	0.00267041	0.006	0.004	1	NA
AC004816.2	1	0	0	0	1	NA
AC004817.3	0.120314	0.000107509	0.001	0	1	NA
AC004817.5	4.79e-09	0.0181261	0.021	0.007	0.000151665	NA
AC004825.2	0.532583	0.000321714	0.001	0.001	1	NA
AC004825.3	0.000309844	0.000527282	0.008	0.016	1	NA
AC004828.1	4.27e-05	0.00849798	0.031	0.018	1	NA
AC004828.2	0.0797378	-0.0014597	0.028	0.034	1	NA
AC004830.2	4.7e-07	0.0126435	0.014	0.004	0.0148702	NA
AC004832.1	0.0152636	0.00205253	0.002	0	1	NA
AC004832.4	0.0694963	0.00137194	0.003	0.001	1	NA
AC004832.5	0.0141965	0.000942646	0.001	0	1	NA
AC004832.6	1	0	0	0	1	NA
AC004834.1	2.26e-22	0.0292846	0.066	0.025	7.15e-18	NA
AC004835.1	0.000191026	0.00632601	0.003	0	1	NA
AC004837.2	1.5e-06	-0.00256857	0	0.006	0.0474984	NA
AC004837.4	0.0114918	-0.00236338	0.014	0.021	1	NA
AC004839.2	2.86e-21	-0.0119105	0.002	0.027	9.04e-17	NA
AC004846.1	0.0688721	0.000742126	0.002	0.001	1	NA
AC004846.2	0.120997	0.000271006	0	0	1	NA
AC004847.1	1	0	0	0	1	NA
AC004852.2	4.78e-08	0.00822938	0.008	0.001	0.00151089	NA
AC004854.2	0.523481	0.00188792	0.011	0.01	1	NA
AC004862.1	1.8e-09	0.00994785	0.007	0	5.69e-05	NA
AC004865.2	0.00392895	0.00237035	0.003	0.001	1	NA
AC004870.2	0.00329339	0.00340205	0.004	0.001	1	NA
AC004870.3	0.0164814	0.003138	0.004	0.001	1	NA
AC004870.4	1.31e-21	0.0192566	0.025	0.003	4.15e-17	NA
AC004875.1	0.0087741	0.00259357	0.002	0	1	NA
AC004877.1	0.353252	0.000680479	0.001	0.001	1	NA
AC004879.1	3.06e-07	0.062006	0.698	0.522	0.00967277	NA
AC004882.1	1	0	0	0	1	NA
AC004882.3	0.10129	0.000301695	0.001	0.002	1	NA
AC004884.2	0.00493015	-0.002446	0.002	0.006	1	NA
AC004889.1	0.000346812	-0.00802017	0.009	0.018	1	NA
AC004893.3	0.0839158	0.00154783	0.002	0.001	1	NA
AC004895.1	0.205684	0.00315624	0.004	0.002	1	NA
AC004900.1	1	0	0	0	1	NA
AC004906.1	0.120997	0.00102868	0	0	1	NA
AC004908.1	0.179007	0.000429007	0.002	0.003	1	NA
AC004908.2	1.14e-11	-0.00666053	0.004	0.02	3.6e-07	NA
AC004908.3	0.382022	0.0011564	0.004	0.003	1	NA
AC004917.1	8.17e-27	0.0372168	0.052	0.013	2.58e-22	NA
AC004918.1	0.00302071	0.00779381	0.027	0.018	1	NA
AC004918.4	0.869649	0.000565064	0.006	0.006	1	NA
AC004921.1	0.0413869	-0.000392871	0	0.001	1	NA
AC004921.2	0.499443	0.00110327	0.003	0.003	1	NA
AC004923.4	0.386569	0.00172199	0.003	0.002	1	NA
AC004930.1	0.272957	0.000587451	0	0	1	NA
AC004936.1	3.36e-11	0.0129532	0.009	0	1.06e-06	NA
AC004938.2	0.524923	0.000747648	0.002	0.002	1	NA
AC004941.1	1	0	0	0	1	NA
AC004943.1	0.179955	0.00122507	0.003	0.001	1	NA
AC004943.2	9.54e-22	0.0410264	0.088	0.041	3.02e-17	NA
AC004943.3	1	0	0	0	1	NA
AC004946.1	0.00242655	0.00333205	0.002	0	1	NA
AC004946.2	0.674342	-0.000604081	0	0	1	NA
AC004947.1	0.0575308	0.0013371	0.001	0	1	NA
AC004947.3	0.120997	0.000562337	0	0	1	NA
AC004949.1	0.158325	0.00552377	0.026	0.031	1	NA
AC004951.1	2.38e-101	0.125683	0.347	0.145	7.52e-97	NA
AC004969.1	2.66e-12	-0.00597346	0.003	0.018	8.41e-08	NA
AC004973.1	0.0604372	0.00190496	0.003	0.001	1	NA
AC004974.1	0.412403	-0.00022455	0	0.001	1	NA
AC004982.1	0.0016204	0.00406234	0.011	0.005	1	NA
AC004982.2	0.0181035	-0.00524639	0.029	0.038	1	NA
AC004988.1	0.0391303	-0.00278648	0.005	0.009	1	NA
AC004990.1	0.272957	0.000676157	0	0	1	NA
AC004994.1	0.227315	-0.000242572	0.001	0.002	1	NA
AC005005.3	0.272957	9.47e-05	0	0	1	NA
AC005005.4	1.39e-05	0.00591443	0.01	0.003	0.438875	NA
AC005006.1	0.542103	0.00132795	0.001	0.001	1	NA
AC005008.2	0.000522403	0.00390603	0.002	0	1	NA
AC005009.2	1.89e-10	0.00935672	0.013	0.002	5.98e-06	NA
AC005013.1	0.272957	0.000134311	0	0	1	NA
AC005014.2	0.367205	0.00153611	0.002	0.001	1	NA
AC005014.4	6.39e-18	-0.00993427	0.004	0.026	2.02e-13	NA
AC005019.2	0.120997	0.000640909	0	0	1	NA
AC005021.1	1	0	0	0	1	NA
AC005034.2	0.272957	0.000244906	0	0	1	NA
AC005034.4	0.13859	0.00107035	0.002	0.001	1	NA
AC005034.5	0.0979667	0.000829928	0.004	0.002	1	NA
AC005034.6	0.822509	0.00288344	0.022	0.021	1	NA
AC005037.1	7.63e-212	0.370184	0.508	0.221	2.41e-207	NA
AC005040.2	0.00244551	0.00325576	0.003	0	1	NA
AC005041.4	1	0	0	0	1	NA
AC005041.5	2.82e-07	-0.00745945	0.016	0.033	0.00892438	NA
AC005042.2	5.88e-05	0.00597049	0.005	0.001	1	NA
AC005046.1	0.422157	0.00024762	0.004	0.006	1	NA
AC005050.1	0.546472	0.000881145	0.007	0.006	1	NA
AC005050.2	1	0	0	0	1	NA
AC005050.3	6.19e-06	0.00697724	0.008	0.002	0.195838	NA
AC005052.2	0.000187411	0.0123959	0.052	0.037	1	NA
AC005062.1	1.25e-09	0.0114046	0.013	0.003	3.96e-05	NA
AC005064.1	5.91e-08	-0.00565181	0.006	0.019	0.00186922	NA
AC005070.3	3.63e-06	-0.00379422	0.004	0.014	0.114712	NA
AC005071.1	0.0928075	-0.000113126	0.001	0	1	NA
AC005072.1	1.01e-22	0.0335595	0.076	0.031	3.2e-18	NA
AC005076.1	0.000167606	-0.00165879	0	0.003	1	NA
AC005081.1	0.0623967	-0.000623413	0.005	0.008	1	NA
AC005082.1	0.0413869	-0.000366752	0	0.001	1	NA
AC005082.2	0.485112	0.000782235	0.004	0.003	1	NA
AC005086.2	0.197161	-0.000136807	0	0	1	NA
AC005089.1	0.112165	0.000400577	0.004	0.003	1	NA
AC005091.1	0.00981477	0.00534614	0.019	0.012	1	NA
AC005096.1	0.489491	0.00165786	0.004	0.003	1	NA
AC005100.1	0.00191944	0.00337579	0.002	0	1	NA
AC005100.2	3.2e-05	0.00712213	0.005	0.001	1	NA
AC005104.3	0.0116139	-3.12e-05	0.003	0.006	1	NA
AC005144.1	0.00122615	0.00524227	0.005	0.001	1	NA
AC005153.1	0.00841596	0.00398476	0.008	0.004	1	NA
AC005154.3	1	0	0	0	1	NA
AC005154.4	0.987254	0.00483804	0.016	0.016	1	NA
AC005162.1	0.000273853	-0.00192742	0.001	0.005	1	NA
AC005162.2	1	0	0	0	1	NA
AC005162.3	3.25e-15	-0.0123771	0.016	0.046	1.03e-10	NA
AC005165.1	0.503128	0.00646717	0.006	0.005	1	NA
AC005165.3	0.120997	0.00106605	0	0	1	NA
AC005180.1	3.97e-05	0.00809344	0.015	0.006	1	NA
AC005180.2	0.0193547	-0.000186154	0.002	0.005	1	NA
AC005197.1	1	0	0	0	1	NA
AC005208.1	0.000408584	0.0071199	0.009	0.003	1	NA
AC005209.1	0.272957	0.000495515	0	0	1	NA
AC005220.1	0.157413	-0.000211466	0	0.001	1	NA
AC005224.2	4.07e-07	-0.015946	0.076	0.049	0.0128579	NA
AC005224.3	4.51e-05	0.00331033	0.009	0.003	1	NA
AC005225.1	0.114181	-0.000259821	0	0.001	1	NA
AC005225.2	6.03e-60	0.112005	0.313	0.168	1.91e-55	NA
AC005225.3	4.54e-11	0.0146162	0.056	0.029	1.43e-06	NA
AC005229.4	0.197161	-0.000171691	0	0	1	NA
AC005229.5	0.00712398	0.00228407	0.003	0.001	1	NA
AC005234.1	0.272957	0.000705704	0	0	1	NA
AC005234.2	0.0141965	0.00255862	0.001	0	1	NA
AC005237.1	0.0340468	-0.000938146	0.036	0.045	1	NA
AC005244.2	0.0282912	0.00168105	0.001	0	1	NA
AC005252.4	0.385801	0.00411158	0.003	0.002	1	NA
AC005253.1	1.36e-06	-0.00398705	0.003	0.011	0.042889	NA
AC005253.2	1	0	0	0	1	NA
AC005261.1	1.3e-44	0.0852455	0.246	0.14	4.12e-40	NA
AC005261.2	0.853355	0.000660605	0	0	1	NA
AC005264.1	0.120997	0.00111587	0	0	1	NA
AC005277.1	1	0	0	0	1	NA
AC005277.2	1	0	0	0	1	NA
AC005280.1	0.000367892	0.00488821	0.004	0.001	1	NA
AC005280.2	0.00370924	0.00249459	0.002	0	1	NA
AC005288.1	0.000657927	-0.00124091	0.004	0.011	1	NA
AC005291.1	0.256767	-0.000534867	0.002	0.001	1	NA
AC005291.2	0.000305609	-0.00176837	0.003	0.009	1	NA
AC005293.1	0.379791	0.00334886	0.012	0.01	1	NA
AC005301.2	0.120997	0.00128752	0	0	1	NA
AC005304.1	1	0	0	0	1	NA
AC005304.2	1	0	0	0	1	NA
AC005304.3	1	0	0	0	1	NA
AC005306.1	0.0024195	0.00536692	0.008	0.004	1	NA
AC005307.1	0.0282912	0.00150386	0.001	0	1	NA
AC005323.1	0.00453248	0.00363335	0.004	0.001	1	NA
AC005323.2	6.07e-05	0.00787601	0.008	0.002	1	NA
AC005324.1	0.0575308	0.00176236	0.001	0	1	NA
AC005324.5	0.253938	-0.000141836	0	0.001	1	NA
AC005329.1	0.394801	-0.000636059	0.004	0.005	1	NA
AC005329.2	1	0	0	0	1	NA
AC005329.3	0.0927062	-0.000637103	0.004	0.002	1	NA
AC005332.1	0.609939	0.000442335	0.004	0.003	1	NA
AC005332.2	0.00311858	0.00202079	0.006	0.002	1	NA
AC005332.3	0.00357908	-0.00105867	0.018	0.028	1	NA
AC005332.4	0.00023002	-0.00520038	0.028	0.042	1	NA
AC005332.5	9.35e-17	0.0149075	0.027	0.006	2.96e-12	NA
AC005332.6	6.46e-26	0.0407818	0.085	0.035	2.04e-21	NA
AC005332.7	0.29519	0.000915015	0.001	0	1	NA
AC005339.1	0.0141965	0.00125661	0.001	0	1	NA
AC005342.1	0.670691	-0.00309253	0.124	0.124	1	NA
AC005342.2	1	0	0	0	1	NA
AC005343.1	0.802491	0.00228263	0.004	0.004	1	NA
AC005343.4	0.120997	0.00122985	0	0	1	NA
AC005344.1	0.00722117	0.000877806	0.001	0	1	NA
AC005355.1	1.93e-109	0.149188	0.22	0.067	6.1e-105	NA
AC005358.1	2.31e-33	-0.0765224	0.077	0.158	7.29e-29	NA
AC005358.2	0.0282441	1.56e-05	0.01	0.015	1	NA
AC005363.2	8.67e-10	-0.00413117	0	0.009	2.74e-05	NA
AC005381.1	0.000338179	0.00231642	0.004	0.001	1	NA
AC005383.1	1	0	0	0	1	NA
AC005387.2	0.381923	0.00187323	0.002	0.001	1	NA
AC005392.2	1	0	0	0	1	NA
AC005392.3	0.234553	0.000983466	0.001	0	1	NA
AC005393.1	0.0029312	0.00315495	0.007	0.003	1	NA
AC005394.1	3.92e-10	0.0126184	0.019	0.005	1.24e-05	NA
AC005400.1	1.39e-10	-0.124093	0.214	0.247	4.39e-06	NA
AC005410.2	0.853787	0.00320167	0.01	0.01	1	NA
AC005414.1	2.77e-17	-0.0262558	0.033	0.073	8.75e-13	NA
AC005476.2	0.0147415	0.00419196	0.007	0.003	1	NA
AC005479.1	0.0098683	-0.000672651	0	0.002	1	NA
AC005479.2	0.53231	6.18e-05	0.002	0.002	1	NA
AC005480.1	0.0271387	-0.0026306	0.07	0.084	1	NA
AC005481.1	1	0	0	0	1	NA
AC005482.1	0.0575308	0.00130936	0.001	0	1	NA
AC005486.1	0.109876	0.00617685	0.014	0.011	1	NA
AC005487.1	7.83e-06	0.00755709	0.011	0.004	0.247696	NA
AC005495.2	0.0098683	-0.000850487	0	0.002	1	NA
AC005498.1	0.0282912	0.00057693	0.001	0	1	NA
AC005498.2	0.149535	-0.000328268	0.002	0.003	1	NA
AC005498.3	2.72e-10	0.025451	0.081	0.051	8.6e-06	NA
AC005519.1	0.0862437	-0.00121545	0.005	0.008	1	NA
AC005520.2	0.000126637	0.0177314	0.075	0.057	1	NA
AC005520.3	0.288071	0.00205667	0.004	0.003	1	NA
AC005520.5	8.07e-38	-0.0311775	0.017	0.074	2.55e-33	NA
AC005522.1	0.0244875	-0.000812942	0	0.002	1	NA
AC005523.1	0.825187	0.000276797	0.005	0.005	1	NA
AC005523.2	5.02e-15	-0.00958919	0.005	0.026	1.59e-10	NA
AC005529.1	0.120997	0.00023204	0	0	1	NA
AC005532.1	3.76e-13	0.012083	0.036	0.013	1.19e-08	NA
AC005534.1	0.0172597	0.00143574	0.003	0.001	1	NA
AC005537.1	9.33e-10	0.0154527	0.014	0.003	2.95e-05	NA
AC005538.1	0.120997	0.00108854	0	0	1	NA
AC005540.1	0.0141965	0.00141507	0.001	0	1	NA
AC005546.1	0.0174305	0.0019643	0.003	0.001	1	NA
AC005548.1	0.0223553	0.00252895	0.002	0.001	1	NA
AC005550.1	1	0	0	0	1	NA
AC005550.2	0.821055	0.000691777	0.001	0.001	1	NA
AC005562.1	3.6e-24	0.059529	0.207	0.134	1.14e-19	NA
AC005580.1	0.00397715	0.00237327	0.003	0.001	1	NA
AC005586.1	0.237658	-0.000176591	0.003	0.004	1	NA
AC005586.2	6.13e-05	0.00239062	0.004	0	1	NA
AC005592.1	1	0	0	0	1	NA
AC005594.1	0.361881	-0.000463531	0	0	1	NA
AC005597.1	0.0244961	-0.000390975	0	0.002	1	NA
AC005599.1	0.000408787	0.0062625	0.011	0.005	1	NA
AC005606.1	1	0	0	0	1	NA
AC005606.2	0.0141965	0.000984605	0.001	0	1	NA
AC005609.1	1	0	0	0	1	NA
AC005609.5	0.120997	0.000360817	0	0	1	NA
AC005614.1	0.00370924	0.00216334	0.002	0	1	NA
AC005616.1	0.062062	0.000689687	0.001	0	1	NA
AC005618.1	0.00133344	-0.00348891	0.034	0.048	1	NA
AC005618.2	0.0575308	0.000620403	0.001	0	1	NA
AC005618.3	0.0575308	0.000538502	0.001	0	1	NA
AC005618.4	0.0879712	0.00731897	0.022	0.018	1	NA
AC005632.3	0.0391087	0.00394988	0.016	0.011	1	NA
AC005632.5	0.00722117	0.00183766	0.001	0	1	NA
AC005632.6	0.00180729	0.0018495	0.01	0.004	1	NA
AC005670.1	0.0542036	-0.000576321	0.002	0.004	1	NA
AC005670.3	3.71e-90	0.153895	0.433	0.242	1.17e-85	NA
AC005674.1	0.120997	0.00106906	0	0	1	NA
AC005674.2	9.86e-05	0.0109174	0.033	0.02	1	NA
AC005682.2	0.00354242	0.00370007	0.004	0.001	1	NA
AC005692.1	0.0467833	-0.000719254	0.001	0.003	1	NA
AC005692.2	0.835786	0.000794966	0.002	0.002	1	NA
AC005692.3	0.0220793	-0.0100324	0.027	0.036	1	NA
AC005695.1	0.614789	-0.000633649	0.001	0.002	1	NA
AC005695.2	3.71e-10	-0.00972758	0.014	0.034	1.17e-05	NA
AC005695.3	0.000274214	0.00209951	0.003	0	1	NA
AC005696.1	2.55e-13	-0.0105908	0.013	0.037	8.07e-09	NA
AC005696.2	0.793332	0.000621438	0.001	0.001	1	NA
AC005696.3	0.272957	0.000384283	0	0	1	NA
AC005696.4	0.055936	0.00139198	0.004	0.002	1	NA
AC005697.2	0.0212409	-2.31e-06	0.003	0.006	1	NA
AC005699.1	0.203979	0.0123182	0.064	0.058	1	NA
AC005703.1	0.272957	0.000229819	0	0	1	NA
AC005703.2	0.117719	-0.00254213	0.004	0.006	1	NA
AC005703.3	0.837096	0.000815527	0.002	0.002	1	NA
AC005703.4	9.94e-06	0.0047475	0.011	0.003	0.314543	NA
AC005703.7	0.572091	0.000130489	0.007	0.009	1	NA
AC005722.3	0.0141965	0.00156487	0.001	0	1	NA
AC005725.1	1	0	0	0	1	NA
AC005726.1	2.16e-13	0.0259236	0.057	0.027	6.82e-09	NA
AC005726.2	0.0575308	0.000539113	0.001	0	1	NA
AC005726.3	0.530205	0.00108669	0.002	0.002	1	NA
AC005726.4	0.0575308	0.000596451	0.001	0	1	NA
AC005726.5	6.39e-15	-0.00886902	0.003	0.021	2.02e-10	NA
AC005730.2	1	0	0	0	1	NA
AC005730.3	0.421257	5.62e-05	0.003	0.004	1	NA
AC005736.1	0.00165456	0.00446	0.01	0.004	1	NA
AC005736.2	0.272957	0.000580105	0	0	1	NA
AC005740.3	4.64e-05	-0.0184097	0.022	0.037	1	NA
AC005740.4	1	0	0	0	1	NA
AC005740.5	0.074743	0.00266493	0.004	0.002	1	NA
AC005746.1	0.0152853	0.000772468	0.002	0	1	NA
AC005746.2	0.000142486	-0.00337689	0.011	0.021	1	NA
AC005753.1	0.272957	0.000194193	0	0	1	NA
AC005753.2	0.0132917	0.00114146	0.003	0.001	1	NA
AC005753.3	1	0	0	0	1	NA
AC005757.1	1	0	0	0	1	NA
AC005759.1	0.156508	0.0113085	0.029	0.025	1	NA
AC005772.1	0.0985022	-0.000247404	0.002	0.001	1	NA
AC005772.2	0.661399	0.00299906	0.008	0.007	1	NA
AC005774.2	0.0681241	-0.000352518	0	0.001	1	NA
AC005775.1	0.00748798	0.00226188	0.006	0.003	1	NA
AC005776.2	0.853355	0.000581104	0	0	1	NA
AC005785.1	0.46729	-0.00010287	0.001	0.001	1	NA
AC005786.2	1	0	0	0	1	NA
AC005786.3	6.57e-07	0.0105942	0.017	0.006	0.0207747	NA
AC005803.1	0.120997	0.000207836	0	0	1	NA
AC005808.1	0.000104032	0.00518531	0.005	0.001	1	NA
AC005821.1	2.82e-07	0.00852859	0.007	0.001	0.00893462	NA
AC005828.1	0.694747	0.00119454	0.002	0.002	1	NA
AC005828.3	0.459585	0.000520837	0	0	1	NA
AC005832.1	0.793216	0.00104512	0.001	0.001	1	NA
AC005833.2	0.754828	-0.000192102	0.003	0.003	1	NA
AC005837.1	8e-09	-0.00598342	0.003	0.014	0.000253055	NA
AC005837.4	8.06e-07	0.00865443	0.014	0.004	0.0254834	NA
AC005838.2	0.350337	-0.00155588	0.011	0.013	1	NA
AC005840.2	2.43e-08	0.00787262	0.014	0.003	0.000767492	NA
AC005840.4	0.382737	0.000971396	0.002	0.001	1	NA
AC005841.1	0.000999033	0.00157471	0.002	0	1	NA
AC005842.1	0.0136238	0.00510085	0.006	0.003	1	NA
AC005845.1	0.272957	0.000179504	0	0	1	NA
AC005856.1	0.00231134	-0.00514277	0.009	0.016	1	NA
AC005863.1	0.0575308	0.000723138	0.001	0	1	NA
AC005865.2	1.48e-08	0.0316455	0.058	0.034	0.000468332	NA
AC005871.2	0.0660427	0.00357376	0.004	0.002	1	NA
AC005884.1	0.0169862	0.000640305	0.012	0.019	1	NA
AC005888.1	1	0	0	0	1	NA
AC005899.1	2.46e-25	0.0291159	0.073	0.027	7.79e-21	NA
AC005899.3	0.197161	-0.000123119	0	0	1	NA
AC005899.5	2.52e-69	0.0745165	0.16	0.049	7.98e-65	NA
AC005899.6	1.29e-09	0.0168496	0.055	0.03	4.1e-05	NA
AC005899.7	9.6e-09	0.0110682	0.052	0.029	0.000303736	NA
AC005899.8	0.0255116	0.00246423	0.029	0.037	1	NA
AC005906.2	8.02e-08	0.00985577	0.007	0.001	0.00253643	NA
AC005906.3	0.412524	0.000104129	0	0.001	1	NA
AC005908.3	0.120997	0.000840332	0	0	1	NA
AC005909.1	0.120997	0.000835967	0	0	1	NA
AC005909.2	1.34e-05	0.0107524	0.01	0.003	0.424904	NA
AC005911.1	1	0	0	0	1	NA
AC005912.2	4.49e-05	0.00468568	0.006	0.001	1	NA
AC005914.1	0.795077	-0.000909192	0.001	0.001	1	NA
AC005920.1	0.010316	0.00549746	0.008	0.004	1	NA
AC005920.2	3e-10	-0.0110441	0.033	0.061	9.5e-06	NA
AC005920.3	0.0441289	0.00238438	0.004	0.002	1	NA
AC005920.4	1	0	0	0	1	NA
AC005921.2	2.69e-45	-0.0262506	0.001	0.049	8.5e-41	NA
AC005921.4	7.62e-05	0.00297196	0.003	0	1	NA
AC005944.1	0.0126941	0.000472504	0.004	0.007	1	NA
AC005954.1	0.0282912	0.00096247	0.001	0	1	NA
AC005954.2	0.820784	0.000749633	0.001	0.001	1	NA
AC005962.1	0.14528	0.000372708	0.001	0.002	1	NA
AC005962.2	0.0413869	-0.000517635	0	0.001	1	NA
AC005972.3	6.04e-05	0.00597147	0.007	0.002	1	NA
AC005993.1	0.00778499	0.0032834	0.004	0.001	1	NA
AC005996.1	1	0	0	0	1	NA
AC005998.1	0.234637	0.000926653	0.001	0	1	NA
AC005999.2	1.48e-09	0.0106063	0.017	0.004	4.69e-05	NA
AC006001.2	4.91e-105	0.140277	0.371	0.169	1.55e-100	NA
AC006004.1	0.00242862	0.00193164	0.002	0	1	NA
AC006007.1	0.674702	0.0005755	0	0	1	NA
AC006008.1	0.00163332	0.00282719	0.008	0.004	1	NA
AC006013.1	0.0045143	0.00173442	0.003	0	1	NA
AC006017.1	0.202327	0.000860004	0.003	0.002	1	NA
AC006019.1	1	0	0	0	1	NA
AC006019.3	0.120997	0.00125685	0	0	1	NA
AC006027.1	0.197161	-0.000196817	0	0	1	NA
AC006033.2	1	0	0	0	1	NA
AC006040.1	0.120997	0.000554172	0	0	1	NA
AC006041.1	0.00722117	0.000908979	0.001	0	1	NA
AC006041.2	2.05e-23	0.0236243	0.043	0.01	6.49e-19	NA
AC006042.1	0.091561	0.00149533	0.004	0.002	1	NA
AC006042.2	2.68e-09	-0.00629754	0.006	0.021	8.47e-05	NA
AC006042.4	0.512073	0.000330699	0.001	0	1	NA
AC006043.1	0.0131538	0.00174164	0.003	0.001	1	NA
AC006058.1	1	0	0	0	1	NA
AC006059.1	0.299773	-0.0113844	0.181	0.176	1	NA
AC006059.4	0.0151974	-0.000281592	0.002	0.004	1	NA
AC006059.5	0.37727	0.00207731	0.009	0.011	1	NA
AC006062.1	0.0045143	0.00116174	0.003	0	1	NA
AC006063.3	0.0141965	0.00296725	0.001	0	1	NA
AC006064.1	0.497722	0.0012537	0.003	0.003	1	NA
AC006064.2	2.46e-17	-0.01232	0.008	0.033	7.78e-13	NA
AC006064.3	0.00230057	0.00447403	0.007	0.003	1	NA
AC006064.4	0.144855	-0.000769485	0.001	0.002	1	NA
AC006064.5	0.120178	0.00275237	0.005	0.003	1	NA
AC006065.4	0.361881	-0.000654609	0	0	1	NA
AC006076.1	0.00745681	0.00528006	0.004	0.001	1	NA
AC006111.1	0.000999033	0.00225597	0.002	0	1	NA
AC006111.2	0.0974509	0.00150703	0.002	0.001	1	NA
AC006111.3	1	0	0	0	1	NA
AC006112.1	1	0	0	0	1	NA
AC006115.2	2.14e-14	0.0473954	0.154	0.104	6.78e-10	NA
AC006116.10	0.00706069	0.00192141	0.003	0.001	1	NA
AC006116.11	0.102225	0.00193343	0.004	0.002	1	NA
AC006116.4	0.808602	9.61e-05	0	0.001	1	NA
AC006116.5	0.00581997	0.00444625	0.011	0.006	1	NA
AC006116.6	0.0269386	0.00153265	0.003	0.001	1	NA
AC006116.8	0.880452	0.00795118	0.03	0.031	1	NA
AC006116.9	0.467378	-5.42e-05	0.001	0.001	1	NA
AC006130.1	0.339028	0.00158898	0.003	0.004	1	NA
AC006130.3	0.206827	0.00102949	0.004	0.002	1	NA
AC006141.1	1.8e-38	0.0579854	0.13	0.056	5.7e-34	NA
AC006144.2	0.53216	0.00127616	0.001	0.001	1	NA
AC006145.1	1.29e-09	-0.00702429	0.01	0.027	4.07e-05	NA
AC006148.1	2.58e-15	0.0276839	0.025	0.006	8.17e-11	NA
AC006148.2	0.00722117	0.00227163	0.001	0	1	NA
AC006150.1	1	0	0	0	1	NA
AC006157.1	0.00191944	0.00114755	0.002	0	1	NA
AC006159.1	0.0496249	-0.00275489	0.006	0.009	1	NA
AC006160.1	0.0917091	0.00300962	0.014	0.018	1	NA
AC006197.2	1.55e-14	0.0224942	0.032	0.01	4.92e-10	NA
AC006206.1	0.674342	-0.000826929	0	0	1	NA
AC006206.2	0.367491	-0.0169042	0.015	0.017	1	NA
AC006207.1	0.120997	0.000197274	0	0	1	NA
AC006213.1	0.046773	-0.000662207	0.001	0.003	1	NA
AC006213.2	1.37e-43	-0.0363677	0.023	0.092	4.33e-39	NA
AC006213.3	5.7e-08	0.0318764	0.17	0.134	0.00180202	NA
AC006213.4	0.535202	0.00136499	0.005	0.004	1	NA
AC006213.5	0.0575308	0.000505052	0.001	0	1	NA
AC006213.7	0.468958	0.00181696	0.004	0.003	1	NA
AC006230.1	1.14e-31	0.0426393	0.058	0.014	3.62e-27	NA
AC006237.1	1	0	0	0	1	NA
AC006238.1	1	0	0	0	1	NA
AC006249.1	0.130925	0.00567926	0.03	0.025	1	NA
AC006252.1	0.00191944	0.00118149	0.002	0	1	NA
AC006262.1	0.000274214	0.00223089	0.003	0	1	NA
AC006262.2	0.138426	0.00243414	0.002	0.001	1	NA
AC006270.1	0.91958	0.00123963	0.002	0.002	1	NA
AC006273.1	1	0	0	0	1	NA
AC006288.1	0.010694	0.00319914	0.005	0.002	1	NA
AC006296.2	0.00370924	0.00215619	0.002	0	1	NA
AC006296.3	2.06e-08	0.00902481	0.007	0	0.000651704	NA
AC006299.1	3.33e-93	0.171211	0.405	0.213	1.05e-88	NA
AC006305.1	5.2e-05	0.00829712	0.006	0.001	1	NA
AC006305.3	0.0282912	0.00147208	0.001	0	1	NA
AC006329.1	0.00722117	0.0010527	0.001	0	1	NA
AC006333.1	6.26e-13	0.0146864	0.344	0.267	1.98e-08	NA
AC006333.2	7.89e-08	-0.00514948	0.007	0.02	0.00249679	NA
AC006348.1	0.000274214	0.00403733	0.003	0	1	NA
AC006355.2	9.39e-21	-0.0145234	0.008	0.038	2.97e-16	NA
AC006369.1	2.28e-24	0.0807062	0.246	0.166	7.2e-20	NA
AC006369.2	0.891285	0.000665754	0.007	0.007	1	NA
AC006372.1	1	0	0	0	1	NA
AC006372.2	1	0	0	0	1	NA
AC006372.3	0.000522403	0.00265312	0.002	0	1	NA
AC006378.1	0.0774495	-0.00116683	0.006	0.009	1	NA
AC006387.1	4.13e-11	-0.00829727	0.013	0.034	1.31e-06	NA
AC006398.1	0.459735	-0.00022028	0	0	1	NA
AC006427.2	0.00370924	0.00230402	0.002	0	1	NA
AC006435.1	1	0	0	0	1	NA
AC006435.2	0.00739739	0.00209454	0.007	0.003	1	NA
AC006435.3	0.272957	0.000220798	0	0	1	NA
AC006441.1	1	0	0	0	1	NA
AC006441.3	1	0	0	0	1	NA
AC006441.4	0.0575308	0.000693089	0.001	0	1	NA
AC006445.3	0.0039758	0.00138679	0.003	0.001	1	NA
AC006449.2	3.39e-05	-0.00284089	0.002	0.009	1	NA
AC006449.3	0.0501144	0.00162512	0.002	0.001	1	NA
AC006449.5	0.272957	0.00019304	0	0	1	NA
AC006449.6	0.000476993	-0.00321346	0.007	0.014	1	NA
AC006452.1	0.352323	-0.00120042	0.004	0.006	1	NA
AC006458.1	1	0	0	0	1	NA
AC006460.1	0.000623108	-0.00289889	0.003	0.008	1	NA
AC006460.2	0.370124	0.00287528	0.051	0.048	1	NA
AC006478.2	1	0	0	0	1	NA
AC006480.2	0.0105469	0.0144814	0.119	0.106	1	NA
AC006483.2	0.0681241	-0.000437114	0	0.001	1	NA
AC006487.1	6.75e-07	0.00615239	0.005	0	0.0213645	NA
AC006487.2	1	0	0	0	1	NA
AC006504.1	0.0626918	0.00441634	0.014	0.01	1	NA
AC006504.2	0.512564	-0.000312382	0.001	0	1	NA
AC006504.5	2.44e-17	0.0440611	0.091	0.049	7.72e-13	NA
AC006504.7	0.211754	-0.000198278	0.003	0.005	1	NA
AC006511.4	0.00370924	0.00136514	0.002	0	1	NA
AC006511.6	0.0002843	0.00572933	0.005	0.001	1	NA
AC006517.2	0.896202	9.83e-05	0	0	1	NA
AC006525.1	4.96e-06	0.00721018	0.011	0.003	0.156975	NA
AC006538.1	0.138689	0.0012259	0.002	0.001	1	NA
AC006538.3	4.22e-09	0.00711805	0.01	0.001	0.000133579	NA
AC006538.4	0.0373738	0.00174767	0.005	0.003	1	NA
AC006547.1	0.0955687	-0.000866566	0.037	0.044	1	NA
AC006547.2	1.72e-06	0.00367995	0.004	0	0.0543492	NA
AC006547.3	4.89e-10	-0.00540647	0.003	0.016	1.55e-05	NA
AC006557.1	1	0	0	0	1	NA
AC006557.3	1	0	0	0	1	NA
AC006566.1	0.00694683	0.00313674	0.013	0.007	1	NA
AC006566.2	0.0575308	0.000406336	0.001	0	1	NA
AC006581.1	0.0198861	-0.000634215	0.004	0.008	1	NA
AC006581.2	1e-05	0.0175785	0.069	0.048	0.317279	NA
AC006942.1	0.0993631	-0.00192156	0.002	0.004	1	NA
AC006946.2	3e-06	0.00388583	0.006	0.001	0.0950129	NA
AC006946.3	0.00370924	0.000952053	0.002	0	1	NA
AC006960.2	0.00242758	0.00422065	0.002	0	1	NA
AC006960.3	1	0	0	0	1	NA
AC006970.3	1	0	0	0	1	NA
AC006972.1	0.00223252	0.00214581	0.012	0.006	1	NA
AC006974.1	0.00127776	0.00304768	0.003	0	1	NA
AC006974.2	1.14e-05	0.00578558	0.004	0	0.35951	NA
AC006994.2	1.35e-12	0.0366915	0.105	0.067	4.26e-08	NA
AC007001.1	0.00370924	0.00207387	0.002	0	1	NA
AC007009.1	1.2e-15	-0.00908149	0.005	0.026	3.8e-11	NA
AC007014.1	3.72e-15	-0.0121782	0.007	0.029	1.18e-10	NA
AC007014.2	0.00722117	0.000833964	0.001	0	1	NA
AC007029.1	0.0295587	-0.00118741	0	0.002	1	NA
AC007032.1	0.674702	3.5e-05	0	0	1	NA
AC007036.1	1	0	0	0	1	NA
AC007036.2	0.120997	0.000562404	0	0	1	NA
AC007036.3	1	0	0	0	1	NA
AC007036.5	1	0	0	0	1	NA
AC007038.1	2.58e-07	0.0374591	0.17	0.138	0.00814884	NA
AC007038.2	8.54e-08	-0.00830673	0.017	0.035	0.00270021	NA
AC007040.1	0.370779	-0.00145252	0	0.001	1	NA
AC007064.2	0.117798	0.0011314	0.002	0.001	1	NA
AC007066.2	0.903666	0.00144425	0.017	0.017	1	NA
AC007091.1	2.57e-08	0.0107245	0.009	0.001	0.00081406	NA
AC007098.1	4.3e-13	-0.00772632	0.015	0.04	1.36e-08	NA
AC007099.1	6.96e-07	0.00835787	0.01	0.002	0.0220149	NA
AC007100.1	2.88e-83	0.155053	0.22	0.076	9.12e-79	NA
AC007100.2	0.51946	0.000395058	0.003	0.002	1	NA
AC007106.1	0.000191444	0.00251203	0.003	0	1	NA
AC007106.2	0.13389	-8.92e-05	0.007	0.005	1	NA
AC007114.1	0.500681	0.01068	0.026	0.024	1	NA
AC007114.2	2.37e-98	-0.0917227	0.024	0.151	7.49e-94	NA
AC007126.1	5.76e-115	0.132871	0.303	0.116	1.82e-110	NA
AC007128.2	0.121301	0.00247161	0.013	0.01	1	NA
AC007130.1	1.98e-21	-0.0140618	0.005	0.032	6.28e-17	NA
AC007132.1	0.464264	0.00166515	0.004	0.004	1	NA
AC007163.1	0.00186056	0.00417251	0.004	0.001	1	NA
AC007179.1	0.0640146	-0.00286459	0.009	0.005	1	NA
AC007179.2	0.0282912	0.000722879	0.001	0	1	NA
AC007182.1	1	0	0	0	1	NA
AC007192.2	0.653602	0.000217606	0.001	0.001	1	NA
AC007193.1	0.00735794	-2.22e-05	0.001	0.004	1	NA
AC007193.2	0.0866205	-0.0161619	0.054	0.063	1	NA
AC007193.3	1	0	0	0	1	NA
AC007216.1	0.114181	-0.000350817	0	0.001	1	NA
AC007216.2	0.0125416	-0.000270637	0.004	0.007	1	NA
AC007216.3	0.154484	-0.00021703	0.011	0.014	1	NA
AC007216.4	2.2e-25	0.0627231	0.243	0.163	6.96e-21	NA
AC007218.1	0.272957	0.000265562	0	0	1	NA
AC007218.2	0.769684	0.000281036	0.001	0.001	1	NA
AC007218.3	0.256536	-0.000659922	0.002	0.001	1	NA
AC007220.1	8.8e-13	0.0197201	0.029	0.009	2.78e-08	NA
AC007220.2	0.685516	0.000264169	0.004	0.004	1	NA
AC007221.1	0.425565	0.00329971	0.021	0.019	1	NA
AC007222.2	0.120997	0.00061342	0	0	1	NA
AC007240.3	0.00219559	0.00215665	0.003	0.001	1	NA
AC007255.1	2.12e-06	0.0086137	0.023	0.011	0.0671899	NA
AC007262.2	3.48e-113	0.199319	0.399	0.191	1.1e-108	NA
AC007271.1	0.00722117	0.00256471	0.001	0	1	NA
AC007272.1	0.00722117	0.00172079	0.001	0	1	NA
AC007277.1	1.24e-05	0.00815768	0.007	0.001	0.390818	NA
AC007278.1	1	0	0	0	1	NA
AC007278.2	1	0	0	0	1	NA
AC007279.2	0.000142584	-0.00298536	0.009	0.019	1	NA
AC007285.1	0.0208357	0.00779095	0.011	0.007	1	NA
AC007285.2	0.0226858	-0.000308542	0.001	0.004	1	NA
AC007292.1	0.00459461	0.00152961	0.002	0	1	NA
AC007292.2	0.0784524	0.000525319	0.003	0.001	1	NA
AC007292.3	0.0608551	0.00347849	0.009	0.006	1	NA
AC007298.1	0.0282912	0.000789663	0.001	0	1	NA
AC007298.2	0.0102181	-0.00267673	0.001	0.004	1	NA
AC007314.1	0.250783	-0.00102838	0.004	0.006	1	NA
AC007317.1	0.746427	0.00630867	0.034	0.033	1	NA
AC007317.2	7.68e-06	0.0128586	0.023	0.011	0.242823	NA
AC007319.1	3.48e-90	0.142274	0.2	0.062	1.1e-85	NA
AC007325.1	1	0	0	0	1	NA
AC007325.2	0.0827121	0.000980206	0.011	0.008	1	NA
AC007325.4	0.192084	-0.0025759	0.029	0.035	1	NA
AC007326.2	1	0	0	0	1	NA
AC007326.5	0.0739401	0.000125115	0.002	0.004	1	NA
AC007327.2	0.025454	-0.000530902	0	0.001	1	NA
AC007333.1	0.272957	0.000414942	0	0	1	NA
AC007333.2	0.000522403	0.00329329	0.002	0	1	NA
AC007336.1	0.821326	-0.000104741	0.001	0.001	1	NA
AC007336.2	1	0	0	0	1	NA
AC007342.1	0.254923	0.000946672	0.002	0.001	1	NA
AC007342.4	0.0575308	0.000879916	0.001	0	1	NA
AC007342.5	0.272957	0.000714455	0	0	1	NA
AC007344.1	2.91e-06	0.00797521	0.01	0.002	0.0921774	NA
AC007347.1	0.0300657	-0.00177806	0.007	0.011	1	NA
AC007349.1	0.120997	0.00106024	0	0	1	NA
AC007349.2	1	0	0	0	1	NA
AC007350.1	1	0	0	0	1	NA
AC007362.1	1	0	0	0	1	NA
AC007364.1	4.43e-30	0.0671452	0.09	0.035	1.4e-25	NA
AC007365.1	0.0222063	-0.000765248	0.001	0.004	1	NA
AC007368.1	0.00246126	0.0110288	0.011	0.005	1	NA
AC007370.1	0.471044	0.00380958	0.013	0.011	1	NA
AC007370.2	4.96e-28	0.0376484	0.091	0.037	1.57e-23	NA
AC007376.2	0.579189	0.000502662	0.006	0.005	1	NA
AC007378.1	0.821462	-0.000138189	0.001	0.001	1	NA
AC007381.1	7.97e-68	0.188759	0.724	0.446	2.52e-63	NA
AC007381.2	2.25e-05	-0.00249871	0.001	0.007	0.712765	NA
AC007383.2	0.0633753	-0.000813102	0.007	0.01	1	NA
AC007383.3	0.0197148	-0.00059135	0.003	0.006	1	NA
AC007384.1	5.37e-21	-0.0189566	0.03	0.075	1.7e-16	NA
AC007387.2	0.0282912	0.000913308	0.001	0	1	NA
AC007387.3	0.0087741	0.00219263	0.002	0	1	NA
AC007389.1	4.04e-28	0.0619646	0.085	0.032	1.28e-23	NA
AC007389.3	0.00582759	0.00314285	0.006	0.002	1	NA
AC007389.5	1	0	0	0	1	NA
AC007390.2	2.28e-12	0.0126279	0.04	0.017	7.23e-08	NA
AC007391.1	1	0	0	0	1	NA
AC007391.2	1	0	0	0	1	NA
AC007391.3	0.131589	0.0116724	0.132	0.124	1	NA
AC007402.1	1.91e-32	0.0696373	0.063	0.016	6.03e-28	NA
AC007405.1	1.56e-14	0.0243684	0.04	0.015	4.95e-10	NA
AC007405.3	0.00813745	-0.00197556	0.005	0.009	1	NA
AC007406.2	0.63819	-0.00132521	0.003	0.003	1	NA
AC007406.3	0.120314	9e-05	0.001	0	1	NA
AC007406.4	1	0	0	0	1	NA
AC007406.5	7.46e-09	0.0166297	0.075	0.048	0.000235967	NA
AC007422.1	2.28e-05	0.0076153	0.015	0.006	0.720503	NA
AC007431.1	0.11783	0.0018528	0.002	0.001	1	NA
AC007431.2	0.552925	0.000419856	0	0.001	1	NA
AC007432.1	0.00712163	0.00268911	0.003	0.001	1	NA
AC007448.4	0.402819	-0.000941211	0.001	0.002	1	NA
AC007448.5	6.36e-19	0.0246561	0.034	0.008	2.01e-14	NA
AC007450.1	0.120314	0.000297513	0.001	0	1	NA
AC007463.1	0.120997	0.000984715	0	0	1	NA
AC007463.2	0.272957	0.00077972	0	0	1	NA
AC007491.1	0.00191944	0.0023101	0.002	0	1	NA
AC007493.1	0.584895	0.0038282	0.004	0.005	1	NA
AC007494.2	0.0193547	-0.000456017	0.002	0.005	1	NA
AC007495.1	0.0290601	0.00445578	0.004	0.002	1	NA
AC007496.1	0.272957	0.000106685	0	0	1	NA
AC007496.2	0.327691	-0.000312709	0.001	0.001	1	NA
AC007497.1	0.120997	0.00031012	0	0	1	NA
AC007513.1	2.3e-08	0.0101966	0.015	0.004	0.000727487	NA
AC007527.1	0.120997	0.00092895	0	0	1	NA
AC007529.1	0.114181	-0.00163762	0	0.001	1	NA
AC007529.2	0.00825434	0.000363248	0.005	0.009	1	NA
AC007533.1	9.33e-08	-0.00569372	0.011	0.026	0.00295224	NA
AC007535.1	0.0222859	0.00363008	0.002	0.001	1	NA
AC007540.1	0.114181	-0.000309915	0	0.001	1	NA
AC007541.1	5.74e-10	-0.00595261	0.009	0.026	1.82e-05	NA
AC007546.1	0.812066	0.000767551	0.003	0.002	1	NA
AC007557.1	0.11783	0.000837405	0.002	0.001	1	NA
AC007557.3	0.892747	8.96e-05	0.001	0.001	1	NA
AC007557.4	0.120997	0.00113595	0	0	1	NA
AC007563.1	0.00191944	0.00140059	0.002	0	1	NA
AC007563.2	1.36e-86	0.196392	0.467	0.256	4.3e-82	NA
AC007563.4	0.433404	-9.82e-06	0.006	0.004	1	NA
AC007566.1	3.04e-51	0.101941	0.35	0.215	9.63e-47	NA
AC007569.1	2.42e-06	-0.00281696	0.002	0.009	0.0764885	NA
AC007570.1	0.793797	4.08e-05	0.001	0.001	1	NA
AC007595.1	0.234637	-0.00014083	0.001	0	1	NA
AC007598.1	1	0	0	0	1	NA
AC007598.2	0.808307	1.41e-05	0	0.001	1	NA
AC007599.2	4.89e-06	-0.00240835	0.004	0.012	0.154696	NA
AC007601.1	0.330984	0.00154111	0.001	0.001	1	NA
AC007601.2	1	0	0	0	1	NA
AC007603.1	1	0	0	0	1	NA
AC007608.1	0.0087741	0.00208171	0.002	0	1	NA
AC007608.3	0.00397446	0.00183095	0.003	0.001	1	NA
AC007610.1	0.0254694	0.00326021	0.005	0.003	1	NA
AC007610.2	0.21886	0.00454245	0.006	0.004	1	NA
AC007610.5	0.00188782	0.00217526	0.004	0.001	1	NA
AC007611.1	0.0640702	0.00616443	0.02	0.015	1	NA
AC007613.1	0.148239	-0.000625282	0.004	0.006	1	NA
AC007614.1	0.0263114	0.00301701	0.004	0.002	1	NA
AC007619.1	0.846727	0.00191267	0.015	0.016	1	NA
AC007620.2	4.11e-08	0.0128792	0.026	0.011	0.00129866	NA
AC007620.3	0.00591874	0.00203322	0.004	0.001	1	NA
AC007622.2	0.00530694	0.000173532	0.005	0.01	1	NA
AC007637.1	0.910905	0.00291905	0.041	0.042	1	NA
AC007638.1	1	0	0	0	1	NA
AC007638.2	0.368565	-0.00119649	0.003	0.004	1	NA
AC007649.1	0.120997	0.00115128	0	0	1	NA
AC007652.1	0.0141965	0.00155901	0.001	0	1	NA
AC007652.2	0.387355	0.00142078	0.003	0.002	1	NA
AC007652.3	0.000174991	0.0079351	0.128	0.103	1	NA
AC007655.1	0.120997	0.000186157	0	0	1	NA
AC007655.2	1.77e-07	0.00657412	0.022	0.009	0.0055849	NA
AC007656.2	0.00185936	0.00550871	0.004	0.001	1	NA
AC007663.2	0.272957	0.000240317	0	0	1	NA
AC007663.3	0.0142347	-0.00101307	0.001	0.003	1	NA
AC007663.4	0.0454974	-0.000660062	0	0.002	1	NA
AC007666.1	8.27e-07	0.0049586	0.011	0.003	0.0261718	NA
AC007666.2	0.172419	0.00141894	0.021	0.025	1	NA
AC007671.1	1	0	0	0	1	NA
AC007679.1	0.835568	0.00148832	0.002	0.002	1	NA
AC007681.1	0.0245021	0.00977525	0.031	0.023	1	NA
AC007682.1	1	0	0	0	1	NA
AC007684.2	0.823286	-0.00048912	0.016	0.015	1	NA
AC007686.2	0.0102884	0.00248347	0.006	0.002	1	NA
AC007686.3	0.0455082	0.0044144	0.006	0.003	1	NA
AC007686.4	0.939265	0.00158568	0.014	0.013	1	NA
AC007687.1	1	0	0	0	1	NA
AC007688.3	0.0575308	0.000757785	0.001	0	1	NA
AC007695.1	9.74e-14	-0.00724872	0.004	0.023	3.08e-09	NA
AC007728.1	0.328627	0.00041261	0.003	0.004	1	NA
AC007728.2	0.11802	0.000706021	0.002	0.001	1	NA
AC007728.3	1	0	0	0	1	NA
AC007731.3	0.120997	0.000350228	0	0	1	NA
AC007736.1	5.02e-05	-0.00239668	0.001	0.007	1	NA
AC007743.1	0.0285128	-0.000147111	0.002	0.004	1	NA
AC007749.1	0.0123209	0.00291773	0.005	0.002	1	NA
AC007749.2	0.654038	1.4e-05	0.001	0.001	1	NA
AC007750.1	0.272957	0.000130742	0	0	1	NA
AC007773.1	0.00109905	0.00891739	0.017	0.009	1	NA
AC007780.1	1.33e-12	-0.0479132	0.094	0.143	4.19e-08	NA
AC007785.1	9.83e-07	0.00847105	0.009	0.002	0.0310976	NA
AC007785.3	0.059848	0.00292081	0.005	0.003	1	NA
AC007786.1	0.462208	0.0016019	0.004	0.004	1	NA
AC007786.4	0.000522403	0.00342051	0.002	0	1	NA
AC007787.1	0.0681241	-0.000448827	0	0.001	1	NA
AC007823.1	0.0549273	0.00253564	0.007	0.004	1	NA
AC007834.1	0.117925	0.00128814	0.002	0.001	1	NA
AC007846.1	0.000493296	0.0109512	0.01	0.004	1	NA
AC007848.1	0.133147	-0.00118493	0.001	0.003	1	NA
AC007849.1	1	0	0	0	1	NA
AC007861.1	1	0	0	0	1	NA
AC007877.1	0.0125869	0.00328278	0.009	0.005	1	NA
AC007878.1	5.42e-15	0.0297435	0.078	0.042	1.71e-10	NA
AC007879.2	1	0	0	0	1	NA
AC007879.3	5.84e-05	0.00740483	0.007	0.002	1	NA
AC007879.4	0.120997	0.000632021	0	0	1	NA
AC007879.5	1	0	0	0	1	NA
AC007880.1	0.0575308	0.00057089	0.001	0	1	NA
AC007881.2	6.21e-05	0.00495753	0.005	0.001	1	NA
AC007881.3	0.000518272	-0.00182478	0.001	0.004	1	NA
AC007881.4	0.000998612	-0.00189155	0.01	0.018	1	NA
AC007906.1	0.819626	0.0009143	0.007	0.006	1	NA
AC007906.2	0.674342	-0.000591998	0	0	1	NA
AC007907.1	0.0413869	-0.000454691	0	0.001	1	NA
AC007920.1	1	0	0	0	1	NA
AC007920.2	0.00077861	-0.00497928	0.031	0.045	1	NA
AC007922.1	0.272957	8.97e-05	0	0	1	NA
AC007922.2	0.0282912	0.000381803	0.001	0	1	NA
AC007922.3	0.0224878	0.00139955	0.002	0.001	1	NA
AC007922.4	0.0282912	0.00170602	0.001	0	1	NA
AC007923.4	2.85e-24	0.0335694	0.069	0.025	9e-20	NA
AC007938.2	0.793914	0.000226412	0.001	0.001	1	NA
AC007938.3	0.361881	-6.96e-05	0	0	1	NA
AC007948.1	1	0	0	0	1	NA
AC007950.1	0.120997	0.000937553	0	0	1	NA
AC007950.2	0.00370924	0.00174773	0.002	0	1	NA
AC007952.2	0.0282912	0.00121413	0.001	0	1	NA
AC007952.3	0.853689	0.000165179	0	0	1	NA
AC007952.4	7.78e-105	0.123837	0.225	0.067	2.46e-100	NA
AC007952.5	0.459436	0.00127323	0	0	1	NA
AC007952.6	0.120997	0.000207841	0	0	1	NA
AC007952.7	0.120997	0.000975101	0	0	1	NA
AC007952.8	1	0	0	0	1	NA
AC007952.9	1	0	0	0	1	NA
AC007953.2	1	0	0	0	1	NA
AC007991.3	2.77e-08	0.0111727	0.012	0.003	0.000874937	NA
AC007993.2	0.272957	0.000289571	0	0	1	NA
AC007993.3	0.0575308	0.000647758	0.001	0	1	NA
AC007996.1	0.975268	0.000694318	0.012	0.012	1	NA
AC007998.3	0.272957	0.000354307	0	0	1	NA
AC007998.4	0.272957	8.83e-05	0	0	1	NA
AC008011.2	0.674702	-0.000353899	0	0	1	NA
AC008014.1	2.66e-40	0.160015	0.729	0.512	8.41e-36	NA
AC008026.3	8.26e-18	0.0160656	0.04	0.012	2.61e-13	NA
AC008033.3	9.68e-06	0.00250813	0.005	0	0.306122	NA
AC008035.1	0.847785	-0.00116554	0.001	0.002	1	NA
AC008040.1	0.511721	0.00241323	0.003	0.002	1	NA
AC008050.1	2.96e-11	0.0250122	0.027	0.009	9.36e-07	NA
AC008056.1	0.000508543	0.00467444	0.005	0.001	1	NA
AC008056.2	0.459436	0.000778233	0	0	1	NA
AC008056.3	0.0282912	0.00135163	0.001	0	1	NA
AC008060.1	0.234637	7.6e-05	0.001	0	1	NA
AC008060.3	0.0141965	0.00250855	0.001	0	1	NA
AC008060.5	0.272957	0.000540978	0	0	1	NA
AC008063.1	0.246554	-0.00018312	0	0.001	1	NA
AC008067.1	0.0046152	0.00224316	0.004	0.001	1	NA
AC008073.1	0.0575308	0.000871174	0.001	0	1	NA
AC008073.2	0.117798	0.00196727	0.002	0.001	1	NA
AC008074.2	0.246554	5.89e-05	0	0.001	1	NA
AC008079.1	4.87e-21	-0.0363746	0.034	0.081	1.54e-16	NA
AC008080.1	1	0	0	0	1	NA
AC008080.3	0.52691	0.00150085	0.001	0.002	1	NA
AC008080.4	0.0282912	0.00139446	0.001	0	1	NA
AC008083.2	0.0132625	0.00219851	0.003	0.001	1	NA
AC008083.3	0.0282912	0.00153598	0.001	0	1	NA
AC008083.4	1	0	0	0	1	NA
AC008088.1	0.0282912	0.00059571	0.001	0	1	NA
AC008105.1	0.0434521	0.00280513	0.003	0.001	1	NA
AC008105.3	0.000540539	0.00701715	0.021	0.012	1	NA
AC008114.1	0.972237	0.000177133	0.002	0.002	1	NA
AC008115.1	0.0575308	0.000929063	0.001	0	1	NA
AC008115.2	0.000522403	0.00337421	0.002	0	1	NA
AC008115.3	2.92e-08	-0.00497396	0.004	0.015	0.000924829	NA
AC008119.1	6.95e-18	-0.0152208	0.006	0.031	2.2e-13	NA
AC008121.2	0.00591874	0.00259004	0.004	0.001	1	NA
AC008121.3	0.282971	0.00016077	0.003	0.002	1	NA
AC008124.1	3.19e-12	0.0431727	0.169	0.124	1.01e-07	NA
AC008125.1	1	0	0	0	1	NA
AC008127.1	0.00426952	0.00313779	0.005	0.002	1	NA
AC008133.1	0.272957	0.00012348	0	0	1	NA
AC008147.1	0.0925147	0.00115626	0.001	0	1	NA
AC008147.2	2.91e-09	0.00884045	0.014	0.003	9.21e-05	NA
AC008149.1	1	0	0	0	1	NA
AC008149.2	0.0434724	0.00213566	0.003	0.001	1	NA
AC008154.1	1	0	0	0	1	NA
AC008164.1	0.120997	0.00136217	0	0	1	NA
AC008170.1	0.00331846	0.00224254	0.004	0.001	1	NA
AC008180.2	1	0	0	0	1	NA
AC008250.1	4.4e-38	-0.0548893	0.054	0.134	1.39e-33	NA
AC008250.2	0.0141965	0.000791631	0.001	0	1	NA
AC008264.2	0.775655	0.00130935	0.004	0.005	1	NA
AC008267.5	0.0598197	-0.000986435	0.018	0.024	1	NA
AC008268.1	0.0575308	0.000500965	0.001	0	1	NA
AC008269.1	9.14e-131	0.211399	0.401	0.173	2.89e-126	NA
AC008269.2	0.114181	-0.000272732	0	0.001	1	NA
AC008273.1	1	0	0	0	1	NA
AC008277.1	2.48e-06	-0.00373787	0.004	0.014	0.0785358	NA
AC008278.1	0.062062	0.000685484	0.001	0	1	NA
AC008278.2	0.0141965	0.0012837	0.001	0	1	NA
AC008280.3	6.16e-13	0.013953	0.019	0.004	1.95e-08	NA
AC008391.1	1	0	0	0	1	NA
AC008393.1	0.0230532	-0.000656243	0.014	0.021	1	NA
AC008395.1	0.0141965	0.000696929	0.001	0	1	NA
AC008397.1	0.0575308	0.0014713	0.001	0	1	NA
AC008403.2	0.0282912	0.00195897	0.001	0	1	NA
AC008403.3	3.29e-05	0.0105412	0.011	0.004	1	NA
AC008406.1	0.272957	0.000576454	0	0	1	NA
AC008415.1	7.04e-10	0.0235169	0.022	0.007	2.23e-05	NA
AC008429.1	0.937071	0.000835165	0.003	0.003	1	NA
AC008429.3	0.677302	0.0021507	0.002	0.002	1	NA
AC008434.1	5.66e-11	0.0120982	0.018	0.004	1.79e-06	NA
AC008438.1	3.45e-13	0.0325293	0.073	0.04	1.09e-08	NA
AC008438.2	0.155525	0.000710455	0.002	0.001	1	NA
AC008440.1	3.63e-09	0.00985559	0.02	0.006	0.000114726	NA
AC008440.2	0.120997	0.000973044	0	0	1	NA
AC008443.1	1.13e-07	0.0322188	0.166	0.133	0.00355908	NA
AC008443.3	0.00396774	0.00093293	0.003	0.001	1	NA
AC008443.4	7.69e-22	-0.0133741	0.007	0.036	2.43e-17	NA
AC008443.5	0.00834368	-0.00343366	0.011	0.017	1	NA
AC008443.6	0.00339533	0.00309887	0.005	0.002	1	NA
AC008443.8	0.000413343	0.0049485	0.012	0.006	1	NA
AC008443.9	0.330909	0.00129112	0.001	0.001	1	NA
AC008453.1	0.412524	0.000444704	0	0.001	1	NA
AC008453.2	0.0091147	0.00366131	0.012	0.007	1	NA
AC008456.1	0.272957	0.000471198	0	0	1	NA
AC008459.1	1	0	0	0	1	NA
AC008462.1	2e-26	0.0458145	0.113	0.054	6.32e-22	NA
AC008464.1	0.0176722	-0.00157223	0.017	0.024	1	NA
AC008467.1	1.04e-63	0.056086	0.08	0.01	3.29e-59	NA
AC008474.1	9.72e-15	0.0309454	0.118	0.073	3.07e-10	NA
AC008494.3	0.0681241	-0.000386862	0	0.001	1	NA
AC008496.2	0.370757	0.00737462	0.14	0.137	1	NA
AC008496.3	0.361881	-0.000540089	0	0	1	NA
AC008507.2	0.114181	-0.000189885	0	0.001	1	NA
AC008507.4	0.00118371	0.00420753	0.009	0.004	1	NA
AC008507.5	0.00722117	0.00197212	0.001	0	1	NA
AC008514.1	0.000510009	0.00558123	0.021	0.012	1	NA
AC008517.1	0.459735	-0.000247298	0	0	1	NA
AC008522.1	0.0716161	-0.000228971	0.001	0.002	1	NA
AC008532.1	0.511827	0.000284864	0.001	0	1	NA
AC008534.1	0.234553	0.00107269	0.001	0	1	NA
AC008537.2	0.513212	0.000494878	0.003	0.002	1	NA
AC008537.4	0.988558	0.00177662	0.005	0.005	1	NA
AC008543.1	1.84e-10	0.0153027	0.022	0.007	5.83e-06	NA
AC008543.3	0.808307	-1.66e-05	0	0.001	1	NA
AC008543.4	1	0	0	0	1	NA
AC008543.5	0.00722117	0.00147206	0.001	0	1	NA
AC008549.2	0.167113	0.00249103	0.006	0.004	1	NA
AC008551.1	3.08e-08	0.0110548	0.038	0.019	0.000973663	NA
AC008554.1	0.000906005	0.00118212	0.011	0.02	1	NA
AC008555.1	0.854024	-0.000630623	0	0	1	NA
AC008555.2	0.0612805	0.00508309	0.009	0.006	1	NA
AC008555.4	0.676123	0.00140136	0.006	0.005	1	NA
AC008555.5	0.387617	0.000560341	0.003	0.002	1	NA
AC008556.1	1	0	0	0	1	NA
AC008567.2	0.0575308	0.000475142	0.001	0	1	NA
AC008567.3	0.120997	0.00033288	0	0	1	NA
AC008568.1	0.000150675	0.00961781	0.008	0.003	1	NA
AC008569.1	0.00038775	-0.000461292	0.004	0.01	1	NA
AC008569.2	0.0623415	-0.00128811	0.006	0.009	1	NA
AC008571.2	2.04e-250	0.49088	0.707	0.349	6.45e-246	NA
AC008572.1	0.16873	0.00243674	0.002	0.001	1	NA
AC008574.1	0.000103558	0.00709363	0.005	0.001	1	NA
AC008581.1	0.0282912	0.00054231	0.001	0	1	NA
AC008588.1	0.0575308	0.000492044	0.001	0	1	NA
AC008591.1	1.8e-12	0.0185357	0.017	0.003	5.68e-08	NA
AC008592.1	0.0223067	0.00315648	0.002	0.001	1	NA
AC008592.2	0.00150861	-0.0034428	0.007	0.014	1	NA
AC008592.4	0.729374	0.000178645	0.002	0.001	1	NA
AC008608.2	1.13e-10	-0.00583006	0.003	0.017	3.57e-06	NA
AC008609.1	0.0039785	0.00152996	0.003	0.001	1	NA
AC008610.1	0.224765	0.00551715	0.013	0.011	1	NA
AC008619.1	0.00926232	0.0146113	0.044	0.035	1	NA
AC008622.2	1	0	0	0	1	NA
AC008625.1	0.162425	-0.00036213	0	0.001	1	NA
AC008627.1	1	0	0	0	1	NA
AC008629.1	6.13e-106	0.150453	0.315	0.132	1.94e-101	NA
AC008632.1	0.062062	0.000370684	0.001	0	1	NA
AC008649.1	0.272957	0.000177312	0	0	1	NA
AC008649.2	0.16143	0.00142253	0.035	0.03	1	NA
AC008655.1	0.0943139	-0.00290602	0.001	0.003	1	NA
AC008655.2	0.459436	0.00108096	0	0	1	NA
AC008659.1	0.278053	0.00138434	0.003	0.002	1	NA
AC008662.1	4.46e-08	0.00706634	0.009	0.001	0.00141001	NA
AC008663.1	0.120997	0.000470273	0	0	1	NA
AC008663.2	0.89262	0.000288265	0.001	0.001	1	NA
AC008667.1	6.36e-14	0.0205453	0.031	0.01	2.01e-09	NA
AC008667.2	0.00401744	-0.000904205	0	0.003	1	NA
AC008667.3	0.272957	0.000732177	0	0	1	NA
AC008674.1	0.835204	0.00153852	0.002	0.002	1	NA
AC008676.1	0.383538	0.00188685	0.003	0.002	1	NA
AC008679.1	3.71e-26	0.035199	0.067	0.023	1.17e-21	NA
AC008680.1	1	0	0	0	1	NA
AC008686.1	0.000107621	-0.00162405	0	0.004	1	NA
AC008687.4	1	0	0	0	1	NA
AC008691.1	2.86e-48	0.0798319	0.11	0.034	9.05e-44	NA
AC008696.2	0.0317062	-0.00913352	0.104	0.119	1	NA
AC008700.1	0.421948	-0.00082146	0.008	0.01	1	NA
AC008703.1	0.00329027	0.00276926	0.004	0.001	1	NA
AC008705.2	0.254877	0.000831084	0.002	0.001	1	NA
AC008708.2	0.0282912	0.00164305	0.001	0	1	NA
AC008728.1	0.835422	0.00177114	0.002	0.002	1	NA
AC008731.1	8.88e-82	-0.0721871	0.025	0.137	2.81e-77	NA
AC008734.1	0.0575308	0.00033362	0.001	0	1	NA
AC008735.1	0.00417448	0.00301049	0.005	0.002	1	NA
AC008735.2	1.98e-28	-0.0235025	0.012	0.055	6.27e-24	NA
AC008735.4	0.951672	-0.000130201	0.003	0.003	1	NA
AC008736.1	0.476363	0.00148481	0.009	0.011	1	NA
AC008737.1	0.00191944	0.00114693	0.002	0	1	NA
AC008738.1	0.74903	0.000165702	0.001	0.001	1	NA
AC008738.2	0.0575308	0.00156562	0.001	0	1	NA
AC008738.3	1	0	0	0	1	NA
AC008738.4	1	0	0	0	1	NA
AC008738.6	1	0	0	0	1	NA
AC008739.1	0.0141965	0.00199087	0.001	0	1	NA
AC008742.1	1	0	0	0	1	NA
AC008747.1	0.26732	-0.000534088	0.002	0.003	1	NA
AC008750.2	1	0	0	0	1	NA
AC008750.3	1	0	0	0	1	NA
AC008750.4	0.345737	-0.000522857	0.002	0.003	1	NA
AC008750.5	2.8e-07	0.00836585	0.01	0.002	0.00885563	NA
AC008750.7	0.0282912	0.001289	0.001	0	1	NA
AC008751.3	0.00626338	0.00201947	0.01	0.005	1	NA
AC008752.1	0.00242965	0.00206675	0.002	0	1	NA
AC008752.2	1	0	0	0	1	NA
AC008758.2	0.772427	0.00127231	0.003	0.003	1	NA
AC008759.2	1	0	0	0	1	NA
AC008759.3	1	0	0	0	1	NA
AC008760.1	0.808602	0.000466799	0	0.001	1	NA
AC008760.2	0.000274214	0.00289659	0.003	0	1	NA
AC008761.1	0.00656238	-0.00173167	0.003	0.006	1	NA
AC008763.1	0.0481785	-0.000352138	0.001	0.003	1	NA
AC008764.2	0.661177	0.00213488	0.006	0.006	1	NA
AC008764.3	0.120997	0.00026334	0	0	1	NA
AC008764.6	0.993179	0.000901958	0.006	0.006	1	NA
AC008764.7	0.132242	0.000894509	0.007	0.004	1	NA
AC008764.8	0.000392099	-0.00240515	0.01	0.019	1	NA
AC008766.1	1	0	0	0	1	NA
AC008770.3	0.379141	0.000483127	0.008	0.006	1	NA
AC008771.1	1.62e-20	-0.0500113	0.098	0.165	5.14e-16	NA
AC008780.1	1.14e-05	0.00630208	0.004	0	0.35951	NA
AC008780.2	0.0514165	-0.00159285	0.011	0.015	1	NA
AC008781.1	0.791877	0.000130642	0.01	0.011	1	NA
AC008781.2	0.0962931	0.0003753	0.005	0.007	1	NA
AC008781.3	0.258204	9.49e-05	0.016	0.019	1	NA
AC008786.1	0.0167718	0.00339865	0.002	0	1	NA
AC008798.2	0.542547	-0.00159493	0.002	0.001	1	NA
AC008798.3	0.272957	0.000301108	0	0	1	NA
AC008805.2	0.0575308	0.00141017	0.001	0	1	NA
AC008825.1	2.75e-53	0.106501	0.065	0.008	8.69e-49	NA
AC008840.1	0.797247	0.00343062	0.012	0.012	1	NA
AC008852.1	1	0	0	0	1	NA
AC008869.1	1	0	0	0	1	NA
AC008870.2	1.78e-06	0.00786154	0.029	0.015	0.0563293	NA
AC008870.4	0.373282	0.000798061	0.008	0.01	1	NA
AC008871.1	0.000480834	-0.00143554	0.004	0.011	1	NA
AC008875.1	0.120997	0.000488845	0	0	1	NA
AC008875.2	1	0	0	0	1	NA
AC008875.3	0.532689	0.000307937	0.001	0.001	1	NA
AC008877.1	0.272957	0.000296923	0	0	1	NA
AC008883.1	9.78e-08	-0.00387741	0.004	0.015	0.00309236	NA
AC008883.2	0.0413869	-0.000505233	0	0.001	1	NA
AC008883.3	0.00198885	0.00479565	0.014	0.007	1	NA
AC008892.1	1e-13	-0.00294632	0.019	0.048	3.18e-09	NA
AC008894.2	0.388089	0.000284351	0.003	0.002	1	NA
AC008897.2	0.00711692	0.00246183	0.003	0.001	1	NA
AC008897.3	0.120997	0.00075326	0	0	1	NA
AC008906.1	0.00888024	0.00607641	0.017	0.011	1	NA
AC008906.2	0.184206	-0.000275101	0.002	0.004	1	NA
AC008914.1	0.00391029	-0.000828833	0	0.002	1	NA
AC008915.1	0.464522	0.000733362	0.004	0.004	1	NA
AC008915.2	0.477397	0.00792084	0.02	0.018	1	NA
AC008937.1	0.36786	0.000889339	0.002	0.001	1	NA
AC008937.2	0.000249113	-0.00123581	0.005	0.012	1	NA
AC008937.3	0.264201	-0.0013282	0.003	0.004	1	NA
AC008938.1	0.00830602	0.00238092	0.002	0	1	NA
AC008945.1	0.272957	0.000201534	0	0	1	NA
AC008945.2	1.2e-06	0.00796793	0.008	0.002	0.0378552	NA
AC008946.1	0.00601291	0.00793163	0.026	0.018	1	NA
AC008948.1	1	0	0	0	1	NA
AC008957.1	9.52e-05	0.0127914	0.046	0.031	1	NA
AC008957.2	0.00127231	-0.00291154	0.078	0.099	1	NA
AC008964.1	0.197161	-0.000196441	0	0	1	NA
AC008966.1	5.27e-16	0.0353581	0.085	0.045	1.67e-11	NA
AC008966.2	0.253779	-0.000250106	0	0.001	1	NA
AC008966.3	0.120997	0.00050996	0	0	1	NA
AC008969.1	0.000122645	-0.0115329	0.091	0.118	1	NA
AC008969.2	0.062062	0.000516976	0.001	0	1	NA
AC008972.1	0.0575308	0.000419957	0.001	0	1	NA
AC008972.2	0.674456	0.000484602	0.002	0.003	1	NA
AC008982.2	0.0511176	0.0015761	0.012	0.008	1	NA
AC008991.1	0.00926782	0.00319213	0.007	0.003	1	NA
AC008992.1	0.272957	0.000429357	0	0	1	NA
AC009005.1	0.00722117	0.00216309	0.001	0	1	NA
AC009019.1	0.0681241	-0.000306933	0	0.001	1	NA
AC009019.2	0.200484	-0.000386835	0.001	0.001	1	NA
AC009021.1	0.0681241	-0.000319438	0	0.001	1	NA
AC009021.2	1	0	0	0	1	NA
AC009032.1	0.000339241	0.00331349	0.009	0.003	1	NA
AC009034.1	0.0413869	-0.000436825	0	0.001	1	NA
AC009035.1	0.0152853	0.0015256	0.002	0	1	NA
AC009041.1	1	0	0	0	1	NA
AC009041.2	0.361881	-0.000550292	0	0	1	NA
AC009041.4	1.59e-05	0.00592067	0.008	0.002	0.504472	NA
AC009053.2	0.629582	0.0016253	0.002	0.002	1	NA
AC009053.3	0.802624	0.00356511	0.006	0.005	1	NA
AC009054.1	0.00134172	0.00110047	0.007	0.003	1	NA
AC009054.2	0.166119	-0.0012102	0.003	0.005	1	NA
AC009055.1	8.52e-08	0.013651	0.013	0.003	0.00269607	NA
AC009055.2	0.00370924	0.00404011	0.002	0	1	NA
AC009060.1	9.71e-09	-0.00678003	0.015	0.034	0.0003072	NA
AC009061.2	2.3e-72	0.103755	0.287	0.134	7.27e-68	NA
AC009063.1	1	0	0	0	1	NA
AC009063.2	0.0609716	0.00874223	0.038	0.031	1	NA
AC009063.3	0.000168819	0.0111661	0.034	0.022	1	NA
AC009065.1	0.0511475	0.000665118	0.002	0	1	NA
AC009065.2	0.66431	-0.000881458	0.003	0.002	1	NA
AC009065.3	1	0	0	0	1	NA
AC009065.4	0.00279969	0.00353872	0.011	0.006	1	NA
AC009065.5	0.128064	0.00100422	0.003	0.002	1	NA
AC009065.6	1	0	0	0	1	NA
AC009065.7	0.120997	0.000241417	0	0	1	NA
AC009065.8	0.80217	0.0018402	0.004	0.004	1	NA
AC009081.1	0.0282912	0.00193434	0.001	0	1	NA
AC009081.2	4.76e-07	0.0097411	0.01	0.002	0.0150409	NA
AC009087.1	0.552458	-0.000163654	0	0.001	1	NA
AC009088.1	0.0379988	0.000932485	0.005	0.003	1	NA
AC009088.2	0.0575308	0.000416127	0.001	0	1	NA
AC009090.1	0.0292007	0.00265797	0.004	0.002	1	NA
AC009090.2	1	0	0	0	1	NA
AC009090.3	0.114181	-0.000240866	0	0.001	1	NA
AC009090.6	3.27e-06	-0.00741955	0.008	0.019	0.103553	NA
AC009093.1	0.361881	-7.22e-05	0	0	1	NA
AC009093.2	7.64e-25	0.0427569	0.098	0.044	2.42e-20	NA
AC009093.4	4.95e-08	-0.00447265	0.002	0.012	0.00156702	NA
AC009093.6	0.00817208	0.00596778	0.011	0.006	1	NA
AC009095.1	1	0	0	0	1	NA
AC009097.1	3.05e-05	-0.00164879	0	0.005	0.964828	NA
AC009097.3	0.0575308	0.00133344	0.001	0	1	NA
AC009102.1	0.0278741	0.00149719	0.002	0	1	NA
AC009102.4	0.62283	0.000479503	0.003	0.003	1	NA
AC009107.1	5.23e-06	0.00470747	0.005	0	0.165302	NA
AC009107.2	0.041717	-0.000209219	0.039	0.049	1	NA
AC009108.3	0.00370924	0.00177074	0.002	0	1	NA
AC009113.1	0.606339	0.00403299	0.014	0.012	1	NA
AC009117.2	0.000271957	0.00747696	0.007	0.002	1	NA
AC009118.2	0.105903	-0.000234669	0.001	0.002	1	NA
AC009118.3	0.554415	0.00226096	0.053	0.057	1	NA
AC009119.1	0.904997	0.00162632	0.013	0.013	1	NA
AC009120.2	3.53e-178	0.271481	0.698	0.357	1.12e-173	NA
AC009120.3	0.26497	0.00107522	0.002	0.001	1	NA
AC009120.4	0.039026	-0.000584879	0.005	0.009	1	NA
AC009120.5	4.04e-11	0.0086448	0.024	0.007	1.28e-06	NA
AC009121.3	0.120997	0.000330115	0	0	1	NA
AC009123.1	1	0	0	0	1	NA
AC009126.1	1.52e-44	0.0810139	0.174	0.081	4.79e-40	NA
AC009127.1	0.0413869	-0.000369074	0	0.001	1	NA
AC009133.1	9.7e-06	-0.00401209	0.005	0.014	0.306815	NA
AC009133.2	1	0	0	0	1	NA
AC009133.3	1	0	0	0	1	NA
AC009133.4	0.0681241	-0.000328436	0	0.001	1	NA
AC009137.1	0.657777	0.00441904	0.011	0.012	1	NA
AC009137.2	1	0	0	0	1	NA
AC009139.1	3.22e-06	0.00688829	0.004	0	0.101896	NA
AC009139.2	0.109854	0.000797297	0.003	0.001	1	NA
AC009141.1	0.401742	0.00056121	0.001	0.002	1	NA
AC009142.1	4e-12	0.0149954	0.032	0.011	1.27e-07	NA
AC009145.1	0.0321269	0.00136873	0.001	0	1	NA
AC009145.3	0.769787	0.000349471	0.001	0.001	1	NA
AC009148.1	2.19e-05	0.0094458	0.019	0.009	0.694065	NA
AC009152.1	1	0	0	0	1	NA
AC009152.3	0.0282912	0.00189484	0.001	0	1	NA
AC009152.6	1	0	0	0	1	NA
AC009154.1	0.00370924	0.00222723	0.002	0	1	NA
AC009154.2	1	0	0	0	1	NA
AC009158.1	0.00370924	0.00231876	0.002	0	1	NA
AC009159.2	0.197161	-0.00014649	0	0	1	NA
AC009159.3	0.0980799	-0.000415709	0	0.001	1	NA
AC009163.1	0.381761	0.000885625	0.004	0.003	1	NA
AC009163.4	0.0221811	0.00180803	0.003	0.001	1	NA
AC009163.7	2.08e-10	-0.00728046	0.009	0.027	6.58e-06	NA
AC009171.2	1.86e-12	0.0132293	0.022	0.005	5.89e-08	NA
AC009185.1	0.880842	-0.000596622	0.004	0.004	1	NA
AC009226.1	2.3e-24	0.0481013	0.085	0.037	7.28e-20	NA
AC009227.1	1	0	0	0	1	NA
AC009228.1	5.88e-09	-0.00308344	0.007	0.021	0.00018614	NA
AC009229.1	0.0575308	0.00184822	0.001	0	1	NA
AC009229.2	0.00722117	0.00139019	0.001	0	1	NA
AC009229.3	1	0	0	0	1	NA
AC009230.1	0.120997	0.00107417	0	0	1	NA
AC009234.1	0.166775	0.000973621	0.001	0	1	NA
AC009236.1	0.533431	-0.000916168	0.001	0.001	1	NA
AC009236.2	0.000999033	0.00294524	0.002	0	1	NA
AC009237.14	0.467437	0.000190206	0.001	0.002	1	NA
AC009237.15	8.2e-06	0.00306562	0.004	0	0.259359	NA
AC009242.1	0.00242138	0.00286503	0.002	0	1	NA
AC009244.2	0.796261	0.00116925	0.001	0.001	1	NA
AC009248.2	0.114181	-0.000244992	0	0.001	1	NA
AC009262.1	0.00122754	0.00370802	0.004	0.001	1	NA
AC009264.1	0.311912	-0.079799	0.344	0.292	1	NA
AC009268.2	0.0575308	0.000692651	0.001	0	1	NA
AC009269.2	0.0007727	0.00070314	0.004	0.01	1	NA
AC009269.3	0.0282912	0.00138808	0.001	0	1	NA
AC009269.4	0.0497162	0.00204427	0.003	0.001	1	NA
AC009269.5	3.56e-05	0.00408438	0.009	0.003	1	NA
AC009271.1	0.0351736	0.00467431	0.005	0.002	1	NA
AC009271.2	0.272957	0.000144511	0	0	1	NA
AC009275.1	0.0437992	0.00189107	0.003	0.001	1	NA
AC009276.1	0.0392427	0.0014443	0.002	0.001	1	NA
AC009283.1	3.79e-06	0.00554558	0.011	0.003	0.11973	NA
AC009292.1	0.272957	0.000243926	0	0	1	NA
AC009292.2	0.0114543	0.0035582	0.006	0.003	1	NA
AC009299.3	0.0121649	0.0111913	0.019	0.013	1	NA
AC009301.1	0.272957	0.000221519	0	0	1	NA
AC009303.2	0.178534	0.00197883	0.018	0.022	1	NA
AC009309.1	4.38e-09	-0.00391909	0.001	0.011	0.000138578	NA
AC009312.1	0.125888	-0.0019452	0.005	0.003	1	NA
AC009313.1	1.01e-05	0.00621551	0.005	0.001	0.31995	NA
AC009315.1	1.66e-64	0.116949	0.149	0.047	5.24e-60	NA
AC009318.1	1.2e-33	0.0600841	0.357	0.238	3.81e-29	NA
AC009318.2	0.16415	-0.000104866	0.005	0.003	1	NA
AC009318.3	0.00993187	0.00171543	0.008	0.004	1	NA
AC009318.4	0.000192118	0.00493603	0.011	0.004	1	NA
AC009320.1	0.747723	0.000962004	0.001	0.001	1	NA
AC009365.1	2e-08	0.010916	0.011	0.002	0.000631214	NA
AC009365.4	7.23e-12	-0.0112501	0.013	0.035	2.29e-07	NA
AC009387.1	0.00826085	0.00442913	0.002	0	1	NA
AC009396.3	1	0	0	0	1	NA
AC009403.1	5.22e-11	-0.00965588	0.02	0.045	1.65e-06	NA
AC009403.2	4.11e-21	0.0292528	0.043	0.012	1.3e-16	NA
AC009404.1	0.0201933	0.0042185	0.019	0.013	1	NA
AC009407.1	0.0575308	0.000316334	0.001	0	1	NA
AC009410.1	0.0192838	-0.000996148	0.002	0.005	1	NA
AC009411.1	0.0141965	0.000906125	0.001	0	1	NA
AC009411.2	0.0087741	0.00240283	0.002	0	1	NA
AC009413.2	3.45e-05	-0.000407913	0.002	0.009	1	NA
AC009432.2	0.517942	0.00168553	0.003	0.003	1	NA
AC009434.1	0.0141965	0.0017893	0.001	0	1	NA
AC009435.1	0.000219943	0.00755119	0.015	0.007	1	NA
AC009446.1	0.0575308	0.00149548	0.001	0	1	NA
AC009464.1	0.00191944	0.00113106	0.002	0	1	NA
AC009468.1	0.0575308	0.00157965	0.001	0	1	NA
AC009478.1	0.0790924	0.00676507	0.009	0.006	1	NA
AC009480.1	0.227364	6.97e-06	0.001	0.002	1	NA
AC009486.1	0.853355	7.73e-05	0	0	1	NA
AC009486.2	0.00912455	0.00428024	0.008	0.004	1	NA
AC009494.2	0.272957	0.00045567	0	0	1	NA
AC009495.1	0.0177082	0.0036255	0.009	0.005	1	NA
AC009495.2	1	0	0	0	1	NA
AC009495.3	0.272957	0.000455814	0	0	1	NA
AC009498.1	1	0	0	0	1	NA
AC009501.3	1.23e-14	-0.0193115	0.039	0.077	3.9e-10	NA
AC009505.1	0.937741	0.00592218	0.018	0.018	1	NA
AC009506.1	0.0207576	-0.00252109	0.006	0.011	1	NA
AC009509.1	2.17e-06	-0.00260764	0.001	0.007	0.0687327	NA
AC009509.2	0.253938	0.000154551	0	0.001	1	NA
AC009509.4	0.155492	0.00106087	0.002	0.001	1	NA
AC009511.1	1	0	0	0	1	NA
AC009511.2	0.821191	0.000119711	0.001	0.001	1	NA
AC009518.1	0.000714557	0.00511529	0.003	0	1	NA
AC009522.1	5.37e-16	0.0252026	0.033	0.01	1.7e-11	NA
AC009531.1	1	0	0	0	1	NA
AC009533.3	1	0	0	0	1	NA
AC009542.1	0.000780526	-0.00102753	0.001	0.006	1	NA
AC009549.1	0.162554	0.00020348	0	0.001	1	NA
AC009554.1	3.44e-06	-0.00299294	0.019	0.035	0.108778	NA
AC009554.2	0.114181	-0.00023178	0	0.001	1	NA
AC009560.1	1	0	0	0	1	NA
AC009560.3	0.00270201	0.002901	0.005	0.001	1	NA
AC009560.4	3.31e-06	0.0101309	0.02	0.009	0.104553	NA
AC009562.1	0.0240597	0.00433837	0.007	0.004	1	NA
AC009563.1	0.328292	0.000990307	0.001	0.001	1	NA
AC009567.1	0.0282912	0.00233425	0.001	0	1	NA
AC009570.1	0.025454	-0.000514119	0	0.001	1	NA
AC009570.2	0.00160972	0.00600379	0.008	0.004	1	NA
AC009597.1	0.0575308	0.000934858	0.001	0	1	NA
AC009623.1	1.17e-13	0.01642	0.022	0.005	3.69e-09	NA
AC009623.2	1	0	0	0	1	NA
AC009623.3	0.0575308	0.00140848	0.001	0	1	NA
AC009630.1	0.00595071	0.00716229	0.038	0.028	1	NA
AC009630.2	1	0	0	0	1	NA
AC009630.3	0.755364	0.000655083	0.003	0.003	1	NA
AC009646.2	0.0926903	0.00125627	0.001	0	1	NA
AC009652.1	8.5e-09	0.0144484	0.038	0.018	0.00026872	NA
AC009654.1	0.0141965	0.00173808	0.001	0	1	NA
AC009682.1	1	0	0	0	1	NA
AC009686.1	0.52705	0.00136999	0.001	0.002	1	NA
AC009686.2	0.0575308	0.000462109	0.001	0	1	NA
AC009690.2	0.000118615	-0.00617359	0.04	0.059	1	NA
AC009704.2	0.22416	0.000620838	0.002	0.001	1	NA
AC009704.3	0.674702	-0.0002464	0	0	1	NA
AC009716.1	0.630349	0.00180014	0.003	0.003	1	NA
AC009720.1	4.9e-07	0.00911459	0.005	0	0.0155102	NA
AC009731.1	0.00370924	0.0016715	0.002	0	1	NA
AC009754.1	0.945862	-0.000588901	0.01	0.01	1	NA
AC009754.2	0.160281	0.00374467	0.01	0.007	1	NA
AC009779.2	0.739824	0.00301164	0.013	0.014	1	NA
AC009779.5	0.0440103	-0.000500422	0.01	0.015	1	NA
AC009802.1	0.227117	-0.000594589	0.001	0.002	1	NA
AC009803.1	0.0167787	0.00148653	0.002	0	1	NA
AC009803.2	0.120997	0.000619593	0	0	1	NA
AC009812.1	0.284083	0.00294551	0.011	0.013	1	NA
AC009812.3	0.0110063	0.00339977	0.007	0.003	1	NA
AC009812.4	0.000550774	0.00419409	0.007	0.002	1	NA
AC009831.1	0.00987349	-0.000707497	0	0.002	1	NA
AC009831.3	0.197161	-0.000206037	0	0	1	NA
AC009835.1	0.234553	0.00103592	0.001	0	1	NA
AC009869.1	0.272957	0.000510348	0	0	1	NA
AC009878.2	8.31e-37	-0.178268	0.141	0.23	2.63e-32	NA
AC009879.4	5.2e-27	0.0495609	0.118	0.057	1.64e-22	NA
AC009884.1	0.000155317	-0.00100779	0.003	0.009	1	NA
AC009899.1	5.05e-07	0.0085028	0.007	0.001	0.0159649	NA
AC009902.2	1	0	0	0	1	NA
AC009902.3	1	0	0	0	1	NA
AC009948.2	2.56e-25	0.0341901	0.06	0.02	8.09e-21	NA
AC009948.3	5.73e-05	0.00472473	0.007	0.002	1	NA
AC009950.1	0.135192	0.00366581	0.003	0.002	1	NA
AC009951.5	0.0145388	-0.000678148	0.003	0.007	1	NA
AC009951.6	0.361881	-0.00013086	0	0	1	NA
AC009955.1	0.731723	0.0049219	0.022	0.023	1	NA
AC009955.2	0.0192563	0.00498874	0.018	0.013	1	NA
AC009955.3	0.672136	0.000861106	0.004	0.005	1	NA
AC009955.4	0.00722117	0.000884268	0.001	0	1	NA
AC009961.1	5.15e-22	0.0599404	0.213	0.142	1.63e-17	NA
AC009961.4	0.000120736	-0.00307526	0.001	0.006	1	NA
AC009962.1	0.330756	0.00325632	0.007	0.005	1	NA
AC009965.1	0.459735	0.000233538	0	0	1	NA
AC009970.1	0.120997	0.000206341	0	0	1	NA
AC009971.1	0.512564	-2.14e-05	0.001	0	1	NA
AC009974.1	1	0	0	0	1	NA
AC009974.2	0.808602	6.33e-05	0	0.001	1	NA
AC009975.1	5.23e-23	0.0435508	0.036	0.007	1.65e-18	NA
AC009975.2	4.16e-10	0.013772	0.014	0.003	1.32e-05	NA
AC009996.1	0.00049805	0.00348786	0.023	0.013	1	NA
AC010082.1	0.000402526	-0.000558091	0	0.004	1	NA
AC010092.1	0.00268282	0.00157834	0.004	0.001	1	NA
AC010096.1	0.000574372	0.00351522	0.005	0.001	1	NA
AC010105.1	4.03e-05	0.00604962	0.003	0	1	NA
AC010132.1	0.272957	0.000543344	0	0	1	NA
AC010132.4	0.0224836	0.00292671	0.007	0.003	1	NA
AC010136.1	0.38774	-0.00618095	0.02	0.023	1	NA
AC010145.1	9.2e-06	0.00797085	0.006	0.001	0.290897	NA
AC010148.1	4.52e-47	0.0731574	0.091	0.025	1.43e-42	NA
AC010149.1	0.215663	0.00401698	0.007	0.005	1	NA
AC010157.1	1	0	0	0	1	NA
AC010168.1	5.03e-90	0.156157	0.476	0.264	1.59e-85	NA
AC010168.2	0.000106244	0.0152841	0.043	0.029	1	NA
AC010173.1	0.0326277	0.00514849	0.006	0.003	1	NA
AC010175.1	5.17e-07	0.00546989	0.024	0.011	0.0163378	NA
AC010181.1	0.0282912	0.00192838	0.001	0	1	NA
AC010183.2	0.00128327	0.00297182	0.003	0	1	NA
AC010185.1	0.0575308	0.000781719	0.001	0	1	NA
AC010186.3	5.72e-08	0.0129594	0.034	0.017	0.00180975	NA
AC010196.1	1	0	0	0	1	NA
AC010197.1	2.91e-06	0.0116917	0.008	0.002	0.0920854	NA
AC010198.1	0.309934	0.00180438	0.046	0.051	1	NA
AC010198.2	0.156472	0.0100357	0.014	0.011	1	NA
AC010201.1	0.616038	8.68e-05	0.001	0.002	1	NA
AC010201.2	0.0192359	0.00249367	0.01	0.006	1	NA
AC010201.3	1.45e-20	0.0471427	0.128	0.074	4.6e-16	NA
AC010203.2	0.0575308	0.000451165	0.001	0	1	NA
AC010205.1	0.0228397	0.00207173	0.007	0.003	1	NA
AC010207.1	3.19e-11	0.00814116	0.014	0.002	1.01e-06	NA
AC010210.1	1.12e-79	0.148739	0.399	0.225	3.55e-75	NA
AC010226.1	0.0354422	0.0105451	0.074	0.064	1	NA
AC010230.1	0.904762	0.00532553	0.007	0.007	1	NA
AC010245.1	0.00063854	-0.00115759	0	0.003	1	NA
AC010245.2	0.00734033	0.00305525	0.007	0.003	1	NA
AC010247.1	1	0	0	0	1	NA
AC010247.2	0.272957	0.000513726	0	0	1	NA
AC010255.1	0.295512	0.00098414	0.001	0	1	NA
AC010255.3	0.00122722	0.00285631	0.005	0.001	1	NA
AC010260.1	0.0571931	0.00061825	0.007	0.011	1	NA
AC010261.1	0.162554	0.000431845	0	0.001	1	NA
AC010261.2	8.28e-08	-0.0057546	0.006	0.019	0.00262051	NA
AC010266.2	0.120997	0.000377381	0	0	1	NA
AC010267.1	0.272957	0.000301108	0	0	1	NA
AC010271.1	1	0	0	0	1	NA
AC010271.2	0.0328994	-0.00133415	0.001	0.003	1	NA
AC010273.2	0.564418	0.00449439	0.021	0.023	1	NA
AC010273.3	1	0	0	0	1	NA
AC010275.1	0.793914	0.000959205	0.001	0.001	1	NA
AC010280.1	0.206345	0.00324974	0.004	0.002	1	NA
AC010280.2	1	0	0	0	1	NA
AC010285.1	1	0	0	0	1	NA
AC010285.3	0.197161	-0.00025553	0	0	1	NA
AC010291.1	0.272957	0.000400339	0	0	1	NA
AC010300.1	0.216906	0.000874736	0.007	0.01	1	NA
AC010307.2	0.000678728	0.00421054	0.003	0	1	NA
AC010307.3	0.120997	0.00102795	0	0	1	NA
AC010307.4	0.361881	-0.000516137	0	0	1	NA
AC010319.3	1	0	0	0	1	NA
AC010319.4	0.287293	0.00227971	0.004	0.002	1	NA
AC010319.5	0.272957	0.000243246	0	0	1	NA
AC010320.1	0.00242965	0.00107909	0.002	0	1	NA
AC010320.2	1.37e-22	-0.0199613	0.008	0.04	4.35e-18	NA
AC010320.3	0.842295	0.00294238	0.007	0.007	1	NA
AC010320.4	0.0168124	-0.00146839	0.012	0.018	1	NA
AC010325.1	0.00447758	0.00331967	0.003	0	1	NA
AC010325.2	1	0	0	0	1	NA
AC010326.3	1.89e-09	0.00683686	0.014	0.003	5.97e-05	NA
AC010327.4	0.00074366	0.0245277	0.184	0.164	1	NA
AC010327.5	0.838042	-0.000789006	0.002	0.002	1	NA
AC010327.7	2.77e-06	0.00508738	0.012	0.004	0.0876575	NA
AC010327.8	0.000350517	0.00603919	0.013	0.006	1	NA
AC010328.1	0.0282912	0.000978416	0.001	0	1	NA
AC010329.1	0.272957	0.000605387	0	0	1	NA
AC010331.1	4.32e-08	-0.0036384	0.002	0.011	0.00136571	NA
AC010332.3	0.0184519	-0.000924959	0.004	0.008	1	NA
AC010333.1	0.0575308	0.00033013	0.001	0	1	NA
AC010333.2	0.785882	0.00111794	0.004	0.004	1	NA
AC010335.1	1	0	0	0	1	NA
AC010336.1	0.196299	0.0011678	0.003	0.002	1	NA
AC010336.4	1	0	0	0	1	NA
AC010336.6	0.0214448	-0.00171683	0.001	0.003	1	NA
AC010336.8	0.398748	-0.000994828	0.007	0.006	1	NA
AC010343.3	0.769505	0.0185126	0.05	0.049	1	NA
AC010359.2	0.954568	0.00023122	0.001	0.001	1	NA
AC010359.3	0.00199509	0.00514041	0.047	0.034	1	NA
AC010378.2	1	0	0	0	1	NA
AC010395.1	0.0141965	0.00190465	0.001	0	1	NA
AC010401.1	0.114181	-0.000279668	0	0.001	1	NA
AC010401.2	0.120997	0.000389051	0	0	1	NA
AC010420.1	0.808454	7.12e-05	0	0.001	1	NA
AC010422.1	0.208926	0.000527895	0.002	0.004	1	NA
AC010422.2	0.0321035	0.00254797	0.005	0.002	1	NA
AC010422.4	0.00722117	0.000962742	0.001	0	1	NA
AC010422.7	1	0	0	0	1	NA
AC010442.1	0.0509783	0.000968148	0.002	0	1	NA
AC010451.1	0.00132089	0.00481068	0.003	0	1	NA
AC010457.1	0.0575308	0.00116489	0.001	0	1	NA
AC010463.3	0.848857	0.000135501	0.001	0.002	1	NA
AC010468.2	1	0	0	0	1	NA
AC010476.2	1.4e-20	0.0457285	0.092	0.045	4.43e-16	NA
AC010487.2	1	0	0	0	1	NA
AC010491.1	3.27e-05	-0.00563542	0.011	0.022	1	NA
AC010491.2	0.0745544	0.00397148	0.007	0.005	1	NA
AC010494.1	1	0	0	0	1	NA
AC010501.2	0.00391029	-0.000793588	0	0.002	1	NA
AC010503.1	1	0	0	0	1	NA
AC010504.1	0.00286891	0.00685505	0.017	0.01	1	NA
AC010511.1	0.00208773	0.00519083	0.005	0.002	1	NA
AC010519.1	2.99e-18	0.0204184	0.034	0.008	9.44e-14	NA
AC010524.1	5.92e-10	-0.00520084	0.003	0.015	1.87e-05	NA
AC010528.1	0.00244736	0.00336801	0.003	0	1	NA
AC010528.2	0.120997	0.000823787	0	0	1	NA
AC010530.1	0.00265321	0.00353098	0.007	0.003	1	NA
AC010531.3	0.200268	-0.00188013	0.002	0.003	1	NA
AC010531.4	0.0282912	0.000730863	0.001	0	1	NA
AC010531.5	0.000281671	-0.00403873	0.005	0.013	1	NA
AC010531.6	0.00230373	-0.00150182	0.001	0.005	1	NA
AC010536.1	0.00370924	0.00116897	0.002	0	1	NA
AC010536.2	0.0575308	0.000303739	0.001	0	1	NA
AC010538.1	7.74e-09	0.00686309	0.01	0.001	0.000244706	NA
AC010542.2	6.92e-05	-0.00167208	0	0.004	1	NA
AC010542.4	0.00191944	0.00261108	0.002	0	1	NA
AC010542.5	1	0	0	0	1	NA
AC010547.1	0.00529157	0.00438419	0.009	0.004	1	NA
AC010547.3	0.120997	0.00027956	0	0	1	NA
AC010601.1	1.76e-05	0.00628443	0.006	0.001	0.556993	NA
AC010609.1	0.18848	0.00221783	0.003	0.002	1	NA
AC010615.2	0.190807	-0.00206835	0.009	0.012	1	NA
AC010618.2	0.547573	0.000131009	0.001	0.001	1	NA
AC010618.3	0.00407971	0.0174655	0.128	0.113	1	NA
AC010623.1	0.59121	0.000468999	0.008	0.009	1	NA
AC010624.1	0.0699192	0.000437573	0.006	0.004	1	NA
AC010624.3	0.120997	0.000832748	0	0	1	NA
AC010624.5	0.152259	-0.000494484	0.011	0.014	1	NA
AC010632.1	0.0378988	0.00249993	0.034	0.043	1	NA
AC010632.2	0.01756	0.00658326	0.03	0.023	1	NA
AC010634.1	0.272957	0.000359105	0	0	1	NA
AC010636.1	1	0	0	0	1	NA
AC010638.1	1.63e-06	-0.00662776	0.011	0.024	0.0516083	NA
AC010641.2	0.0172998	0.00224499	0.003	0.001	1	NA
AC010642.2	0.00051946	0.0132942	0.028	0.017	1	NA
AC010643.1	8.22e-07	0.00675356	0.006	0	0.0260097	NA
AC010649.1	0.0506377	0.000610618	0.002	0.001	1	NA
AC010654.1	0.185472	3.91e-05	0.002	0.004	1	NA
AC010677.2	6.05e-06	0.00573301	0.004	0	0.191267	NA
AC010680.1	3.31e-46	-0.132011	0.105	0.203	1.05e-41	NA
AC010680.2	2.49e-69	0.0632657	0.103	0.019	7.87e-65	NA
AC010680.3	9.66e-10	0.00977222	0.018	0.005	3.06e-05	NA
AC010680.4	0.150906	0.00511076	0.02	0.016	1	NA
AC010680.5	0.271003	-0.00114515	0.029	0.033	1	NA
AC010719.1	0.954795	0.000420997	0.001	0.001	1	NA
AC010727.1	0.511827	0.000991859	0.001	0	1	NA
AC010729.2	0.255554	-0.00102228	0.005	0.007	1	NA
AC010731.2	0.403285	-0.000104827	0.001	0.002	1	NA
AC010735.1	0.0321269	0.000678463	0.001	0	1	NA
AC010735.2	0.173874	0.00401066	0.021	0.017	1	NA
AC010737.1	0.00370924	0.000942381	0.002	0	1	NA
AC010745.2	0.00124805	0.00634776	0.005	0.002	1	NA
AC010745.5	0.0282912	0.00193108	0.001	0	1	NA
AC010746.2	1	0	0	0	1	NA
AC010754.1	0.00191944	0.00209452	0.002	0	1	NA
AC010761.1	0.00619848	-0.00085169	0	0.002	1	NA
AC010761.2	0.0684025	0.00227742	0.002	0.001	1	NA
AC010761.3	0.710532	0.000560235	0.002	0.002	1	NA
AC010761.4	1	0	0	0	1	NA
AC010768.1	1	0	0	0	1	NA
AC010768.2	1	0	0	0	1	NA
AC010776.1	0.00391029	-0.000798329	0	0.002	1	NA
AC010776.2	0.00247562	-0.0010609	0	0.002	1	NA
AC010776.3	0.000408185	-0.00159128	0	0.003	1	NA
AC010789.1	0.0152799	0.00163715	0.002	0	1	NA
AC010789.2	8.57e-05	0.0138925	0.026	0.015	1	NA
AC010809.1	1.45e-08	0.0142778	0.04	0.021	0.000458004	NA
AC010809.2	0.000132589	0.00882319	0.019	0.01	1	NA
AC010809.3	0.0222046	0.00118738	0.003	0.001	1	NA
AC010834.1	0.412524	2.01e-06	0	0.001	1	NA
AC010834.2	0.749359	-0.000630932	0.005	0.006	1	NA
AC010834.3	0.102885	0.00201409	0.009	0.006	1	NA
AC010864.1	0.673858	0.00107919	0.002	0.003	1	NA
AC010880.1	0.0252966	0.004589	0.005	0.003	1	NA
AC010883.1	0.00271488	0.00509035	0.006	0.002	1	NA
AC010883.2	0.120997	0.000885114	0	0	1	NA
AC010883.3	0.169808	0.00433099	0.023	0.019	1	NA
AC010884.1	0.67749	0.00763053	0.02	0.019	1	NA
AC010884.2	0.0575308	0.00103439	0.001	0	1	NA
AC010889.1	1.07e-12	0.00682397	0.01	0	3.38e-08	NA
AC010889.2	1.29e-22	0.0129009	0.018	0	4.08e-18	NA
AC010894.2	0.0103016	-0.000930867	0.001	0.004	1	NA
AC010894.3	0.000552953	0.0185851	0.028	0.018	1	NA
AC010894.4	1	0	0	0	1	NA
AC010896.1	0.00296678	0.00359168	0.007	0.003	1	NA
AC010904.2	0.0575308	0.000868337	0.001	0	1	NA
AC010907.2	0.0575308	0.000814526	0.001	0	1	NA
AC010913.1	0.114181	-0.000715525	0	0.001	1	NA
AC010931.2	0.11802	0.000848713	0.002	0.001	1	NA
AC010931.3	0.0087741	0.00303343	0.002	0	1	NA
AC010967.1	1.92e-39	-0.213781	0.096	0.188	6.08e-35	NA
AC010967.2	1	0	0	0	1	NA
AC010969.1	1	0	0	0	1	NA
AC010969.2	0.000937574	0.00430358	0.008	0.003	1	NA
AC010969.3	0.89644	-0.000311762	0	0	1	NA
AC010973.1	0.506097	0.000637189	0.003	0.002	1	NA
AC010973.2	0.117862	0.00134692	0.002	0.001	1	NA
AC010974.1	0.0575308	0.00175358	0.001	0	1	NA
AC010974.2	0.000433378	-0.00686082	0.044	0.062	1	NA
AC010975.1	0.272957	0.00012843	0	0	1	NA
AC010976.1	6.89e-05	-0.00296795	0.039	0.058	1	NA
AC010976.2	4.06e-08	-0.00615788	0.004	0.015	0.00128449	NA
AC010978.1	1.09e-07	-0.00429311	0.002	0.012	0.00345628	NA
AC010980.1	0.86089	0.00149482	0.002	0.002	1	NA
AC010983.1	0.120269	0.00116999	0.001	0	1	NA
AC010987.1	0.947439	-0.00100109	0.003	0.003	1	NA
AC010991.1	4.9e-07	0.0074361	0.005	0	0.0155102	NA
AC010996.1	0.308507	0.00123973	0.008	0.006	1	NA
AC010997.2	0.0681241	-0.000311128	0	0.001	1	NA
AC010997.3	0.000715976	0.00182764	0.018	0.028	1	NA
AC010997.4	0.208986	-0.000111765	0.002	0.004	1	NA
AC010997.5	8.15e-09	-0.00450714	0.001	0.01	0.000257789	NA
AC010998.1	0.283691	0.00133111	0.003	0.002	1	NA
AC010998.2	0.145219	-0.000113683	0.001	0.002	1	NA
AC010999.1	1	0	0	0	1	NA
AC010999.2	0.246308	-0.000157207	0	0.001	1	NA
AC011005.1	0.00722117	0.00208475	0.001	0	1	NA
AC011008.1	0.120997	0.00096881	0	0	1	NA
AC011029.1	5.26e-11	0.0306787	0.028	0.01	1.66e-06	NA
AC011043.1	0.283475	0.00218445	0.031	0.035	1	NA
AC011043.2	0.272957	0.00046798	0	0	1	NA
AC011092.2	2.77e-24	-0.0279733	0.035	0.087	8.76e-20	NA
AC011092.3	4.98e-06	-0.00468586	0.005	0.014	0.157601	NA
AC011095.1	0.459735	0.00036354	0	0	1	NA
AC011124.1	0.00707471	0.00284783	0.003	0.001	1	NA
AC011124.2	0.0141965	0.00127796	0.001	0	1	NA
AC011131.1	0.120997	0.000694532	0	0	1	NA
AC011139.1	1	0	0	0	1	NA
AC011193.1	0.120997	0.000766284	0	0	1	NA
AC011228.2	0.0141965	0.00162421	0.001	0	1	NA
AC011233.2	0.272957	0.000373658	0	0	1	NA
AC011239.1	0.272957	0.000216874	0	0	1	NA
AC011243.1	0.327958	-0.000658228	0.001	0.001	1	NA
AC011246.1	9.87e-22	0.0412374	0.043	0.012	3.12e-17	NA
AC011247.1	0.253938	-0.000171204	0	0.001	1	NA
AC011257.1	0.0282912	0.00110232	0.001	0	1	NA
AC011284.1	0.0575308	0.00042733	0.001	0	1	NA
AC011287.1	1.02e-35	0.10038	0.956	0.9	3.21e-31	NA
AC011287.2	4.61e-05	-0.000795008	0.022	0.036	1	NA
AC011290.1	0.318188	0.00376623	0.013	0.011	1	NA
AC011294.1	0.00532899	0.00771413	0.009	0.004	1	NA
AC011298.1	1	0	0	0	1	NA
AC011306.1	3.58e-11	0.0124419	0.014	0.002	1.13e-06	NA
AC011313.1	0.0575308	0.00122523	0.001	0	1	NA
AC011317.1	0.55564	0.000894445	0.003	0.004	1	NA
AC011322.1	0.330834	0.000895171	0.001	0.001	1	NA
AC011330.2	0.00833389	0.00184839	0.006	0.003	1	NA
AC011337.1	0.996304	0.000694768	0.001	0.001	1	NA
AC011346.1	4.34e-114	0.262326	0.651	0.381	1.37e-109	NA
AC011351.1	0.391137	0.00135222	0.029	0.032	1	NA
AC011352.1	0.0141965	0.000773467	0.001	0	1	NA
AC011362.1	0.0282912	0.0022344	0.001	0	1	NA
AC011363.1	1	0	0	0	1	NA
AC011365.1	0.264926	0.00234408	0.002	0.001	1	NA
AC011365.2	0.0282912	0.0015721	0.001	0	1	NA
AC011369.1	5.16e-07	-0.0525562	0.151	0.188	0.0163113	NA
AC011370.1	1	0	0	0	1	NA
AC011373.1	1	0	0	0	1	NA
AC011374.1	0.120997	0.000556629	0	0	1	NA
AC011374.2	1	0	0	0	1	NA
AC011374.3	1	0	0	0	1	NA
AC011377.1	0.539412	0.00156194	0.002	0.001	1	NA
AC011379.1	0.00104268	-0.00544422	0.053	0.039	1	NA
AC011379.2	0.0543685	0.00297534	0.005	0.003	1	NA
AC011383.1	6.18e-12	-0.0127715	0.011	0.032	1.96e-07	NA
AC011389.1	0.367336	0.00158051	0.002	0.001	1	NA
AC011389.2	1	0	0	0	1	NA
AC011396.2	0.000139121	0.00620224	0.006	0.001	1	NA
AC011405.1	8.07e-05	-0.00125207	0.019	0.032	1	NA
AC011407.1	1.79e-05	0.0054026	0.005	0	0.565047	NA
AC011416.3	0.00452454	0.00252802	0.004	0.001	1	NA
AC011416.4	0.00220091	0.0039078	0.003	0.001	1	NA
AC011442.1	0.0806869	-2.05e-05	0.002	0.004	1	NA
AC011443.1	0.000622214	-0.00189647	0.002	0.007	1	NA
AC011444.1	1.05e-06	7.53e-05	0.012	0.026	0.0330555	NA
AC011444.2	0.347495	0.00361191	0.013	0.011	1	NA
AC011444.3	0.133545	0.00285449	0.008	0.006	1	NA
AC011445.1	1	0	0	0	1	NA
AC011445.2	0.99692	0.000345319	0.001	0.001	1	NA
AC011446.1	0.00191944	0.00209919	0.002	0	1	NA
AC011446.2	1	0	0	0	1	NA
AC011446.3	1	0	0	0	1	NA
AC011447.3	0.0358547	0.0202515	0.053	0.045	1	NA
AC011450.1	0.30703	0.00182888	0.008	0.006	1	NA
AC011451.1	0.114181	-0.000280449	0	0.001	1	NA
AC011451.3	0.0498496	0.012934	0.058	0.05	1	NA
AC011451.4	0.0141965	0.000926547	0.001	0	1	NA
AC011453.1	1	0	0	0	1	NA
AC011455.1	0.00191944	0.00248221	0.002	0	1	NA
AC011455.6	0.567418	0.00386413	0.01	0.011	1	NA
AC011461.1	0.892365	1.55e-05	0.001	0.001	1	NA
AC011462.3	0.0575308	0.000559093	0.001	0	1	NA
AC011462.4	0.158851	0.000964519	0.004	0.003	1	NA
AC011462.5	0.0034765	-0.00207056	0.002	0.006	1	NA
AC011466.1	0.21696	0.000864226	0.006	0.009	1	NA
AC011466.2	0.114181	-0.000262924	0	0.001	1	NA
AC011466.3	0.439022	0.00189957	0.002	0.003	1	NA
AC011467.1	0.00061521	-0.00261618	0.002	0.007	1	NA
AC011468.1	0.074668	0.00216248	0.004	0.002	1	NA
AC011468.3	0.120997	0.000669951	0	0	1	NA
AC011468.5	2.22e-11	-0.00601066	0.004	0.019	7.01e-07	NA
AC011471.2	0.00146261	-0.00125106	0	0.004	1	NA
AC011472.1	1.01e-08	0.0247395	0.106	0.074	0.000319793	NA
AC011472.2	2.68e-05	0.00512287	0.007	0.002	0.847772	NA
AC011472.3	1	0	0	0	1	NA
AC011472.4	0.00601611	0.0033162	0.014	0.008	1	NA
AC011473.1	0.512564	-0.000130037	0.001	0	1	NA
AC011473.3	0.361881	-6.62e-05	0	0	1	NA
AC011474.1	0.0004573	0.0085215	0.008	0.003	1	NA
AC011476.3	8.08e-05	0.0136871	0.054	0.038	1	NA
AC011477.2	0.0227103	0.00607296	0.022	0.015	1	NA
AC011477.3	0.155802	-0.000293226	0.001	0.002	1	NA
AC011477.8	0.000144397	0.0021962	0.003	0	1	NA
AC011477.9	5.85e-06	-0.00561857	0.03	0.049	0.184891	NA
AC011478.1	0.954908	0.00136978	0.001	0.001	1	NA
AC011479.2	0.00438967	-0.000145214	0.006	0.002	1	NA
AC011479.3	3.34e-05	0.00356107	0.005	0.001	1	NA
AC011481.1	0.183266	0.00619504	0.014	0.011	1	NA
AC011481.2	0.179955	0.00130025	0.003	0.001	1	NA
AC011483.1	0.00021008	0.00449463	0.008	0.003	1	NA
AC011483.2	0.00191944	0.00271703	0.002	0	1	NA
AC011484.1	0.272957	0.000521328	0	0	1	NA
AC011491.3	0.0255773	0.00369871	0.005	0.003	1	NA
AC011495.2	0.0681241	-0.000341312	0	0.001	1	NA
AC011495.3	1	0	0	0	1	NA
AC011498.1	0.176528	0.00397777	0.012	0.01	1	NA
AC011498.3	1	0	0	0	1	NA
AC011498.6	0.0141965	0.000917293	0.001	0	1	NA
AC011503.1	0.0974509	0.00415928	0.002	0.001	1	NA
AC011503.2	0.361881	-5.34e-05	0	0	1	NA
AC011503.4	0.272957	0.000199728	0	0	1	NA
AC011507.1	0.00132343	0.00475851	0.003	0	1	NA
AC011509.2	1.83e-05	0.00821962	0.011	0.004	0.577942	NA
AC011509.3	0.0141965	0.00174896	0.001	0	1	NA
AC011510.1	1	0	0	0	1	NA
AC011511.2	0.900742	0.00395769	0.008	0.008	1	NA
AC011511.3	0.0681241	-0.000419986	0	0.001	1	NA
AC011511.5	0.0575308	0.00101555	0.001	0	1	NA
AC011516.1	0.120997	0.000390706	0	0	1	NA
AC011523.1	0.0141965	0.00151395	0.001	0	1	NA
AC011524.1	0.0413869	-0.000385984	0	0.001	1	NA
AC011524.2	1.5e-15	-0.00907811	0.003	0.023	4.74e-11	NA
AC011525.1	0.120997	0.00112697	0	0	1	NA
AC011586.1	0.0604664	0.00227663	0.003	0.001	1	NA
AC011586.2	3.41e-10	0.0204513	0.017	0.004	1.08e-05	NA
AC011591.1	1	0	0	0	1	NA
AC011593.1	0.00461016	0.002195	0.002	0	1	NA
AC011595.1	0.000306819	-0.00146351	0.002	0.008	1	NA
AC011595.2	0.0282912	0.000889357	0.001	0	1	NA
AC011603.1	1	0	0	0	1	NA
AC011603.2	4.11e-45	0.0916656	0.189	0.093	1.3e-40	NA
AC011611.3	1	0	0	0	1	NA
AC011611.4	0.253859	-0.000279386	0	0.001	1	NA
AC011625.1	0.0678539	0.000175529	0.004	0.007	1	NA
AC011632.1	0.242268	0.00133084	0.002	0.001	1	NA
AC011632.2	0.120997	0.00104114	0	0	1	NA
AC011676.1	0.000215401	0.00292122	0.007	0.002	1	NA
AC011676.2	0.330834	0.000899044	0.001	0.001	1	NA
AC011676.3	0.679189	-0.000100777	0.002	0.002	1	NA
AC011700.1	3.76e-09	0.012452	0.02	0.007	0.000118775	NA
AC011726.2	7.36e-05	0.00267171	0.009	0.003	1	NA
AC011726.3	0.0141965	0.000801083	0.001	0	1	NA
AC011731.1	1	0	0	0	1	NA
AC011747.1	0.0575308	0.00135826	0.001	0	1	NA
AC011751.1	0.0655302	0.00170948	0.006	0.003	1	NA
AC011752.1	1	0	0	0	1	NA
AC011753.2	4.03e-05	0.00286563	0.003	0	1	NA
AC011754.1	0.120997	0.00143134	0	0	1	NA
AC011754.2	0.0602766	0.00245971	0.003	0.001	1	NA
AC011773.1	1	0	0	0	1	NA
AC011773.2	0.0141965	0.000734019	0.001	0	1	NA
AC011773.3	2.69e-06	-0.00156663	0.007	0.019	0.0850541	NA
AC011773.4	0.11293	0.00100542	0.014	0.019	1	NA
AC011815.1	0.055011	0.00577776	0.022	0.017	1	NA
AC011815.2	6.55e-05	-0.00647529	0.011	0.022	1	NA
AC011816.2	0.114181	-0.000255855	0	0.001	1	NA
AC011824.1	1	0	0	0	1	NA
AC011824.2	0.0321658	0.0018326	0.001	0	1	NA
AC011825.2	0.311499	-0.000339255	0.006	0.008	1	NA
AC011825.4	0.74819	0.000532744	0.001	0.001	1	NA
AC011840.1	1	0	0	0	1	NA
AC011841.1	0.998583	-0.00257595	0.002	0.002	1	NA
AC011853.2	0.120997	0.000953162	0	0	1	NA
AC011897.1	0.00191944	0.00280245	0.002	0	1	NA
AC011899.2	1	0	0	0	1	NA
AC011899.4	1	0	0	0	1	NA
AC011900.1	7.62e-05	0.00626655	0.003	0	1	NA
AC011901.1	0.0167787	0.00206557	0.002	0	1	NA
AC011912.1	0.117893	0.0010168	0.002	0.001	1	NA
AC011921.1	7.31e-08	0.0185616	0.041	0.022	0.00231341	NA
AC011933.2	0.128362	0.00189528	0.006	0.004	1	NA
AC011933.3	0.00391029	-0.000705263	0	0.002	1	NA
AC011933.4	1.15e-22	-0.017208	0.017	0.056	3.64e-18	NA
AC011939.2	0.000384799	0.00921152	0.019	0.011	1	NA
AC011939.3	0.00370924	0.00113303	0.002	0	1	NA
AC011944.1	0.272957	0.000545954	0	0	1	NA
AC011978.2	0.865023	8.38e-05	0.004	0.003	1	NA
AC011990.1	0.00319954	0.00253031	0.006	0.002	1	NA
AC011995.2	0.00913763	0.00408257	0.007	0.012	1	NA
AC011997.1	1.39e-26	0.0630201	0.168	0.098	4.41e-22	NA
AC011997.2	7.92e-09	-0.0304218	0.078	0.115	0.000250559	NA
AC012020.1	3.27e-08	0.0155688	0.034	0.017	0.00103535	NA
AC012038.1	0.205784	-0.000445893	0.001	0.002	1	NA
AC012038.2	0.109555	0.000727593	0.003	0.001	1	NA
AC012050.1	1	0	0	0	1	NA
AC012055.1	0.808307	5.48e-05	0	0.001	1	NA
AC012060.1	2.47e-05	-0.00796636	0.011	0.023	0.781104	NA
[truncated: 28,845 more rows]

## Sheet: Supplemental Table5B
Gene	p_val	avg_log2FC	pct.1	pct.2	p_val_adj	Chromosome
A1BG	0.961083	-0.0027354	0.002	0.002	1	chr-19
A1BG-AS1	0.133826	-0.000274456	0.006	0.004	1	chr-19
A1CF	0.0589561	0.00492849	0.008	0.005	1	chr-10
A2M	2.29728e-106	-0.347318	0.19	0.372	7.2663e-102	chr-12
A2M-AS1	2.32377e-18	0.0336184	0.091	0.04	7.3501e-14	chr-12
A2ML1	0.00111492	0.00607327	0.011	0.005	1	chr-12
A2ML1-AS1	6.31955e-37	-0.0400397	0.004	0.048	1.99887e-32	chr-12
A3GALT2	0.0157427	0.0021371	0.004	0.001	1	chr-1
A4GALT	3.40426e-87	0.183558	0.438	0.205	1.07677e-82	chr-22
A4GNT	0.347874	0.00033326	0	0	1	chr-3
AAAS	8.96777e-05	0.00590109	0.111	0.082	1	chr-12
AACS	1.60588e-20	0.0476006	0.199	0.116	5.07939e-16	chr-12
AADAC	0.0603584	0.000883304	0.001	0	1	chr-3
AADACL2	0.380965	0.00109485	0.001	0	1	chr-3
AADACL2-AS1	3.84314e-09	0.0174974	0.014	0.002	0.000121559	chr-3
AADACL3	0.103864	0.00205407	0.001	0	1	chr-1
AADACL4	0.0603584	0.00121935	0.001	0	1	chr-1
AADAT	0.260809	-0.0191418	0.046	0.05	1	chr-4
AAGAB	9.60596e-12	0.0144258	0.187	0.122	3.03836e-07	chr-15
AAK1	4.87055e-34	0.111699	0.926	0.851	1.54056e-29	chr-2
AAMDC	1.48437e-06	0.0100144	0.461	0.36	0.0469505	chr-11
AAMP	0.218311	-0.0170666	0.029	0.033	1	chr-2
AANAT	0.0821291	0.00297543	0.004	0.002	1	chr-17
AAR2	0.0862024	-0.0127143	0.065	0.054	1	chr-20
AARD	0.103864	0.000410927	0.001	0	1	chr-8
AARS	1.02461e-36	0.0752544	0.188	0.085	3.24085e-32	NA
AARS2	9.7686e-06	0.0122803	0.065	0.042	0.308981	chr-6
AARSD1	3.97866e-09	0.0239044	0.156	0.106	0.000125845	chr-17
AASDH	0.00141272	-0.00995882	0.221	0.177	1	chr-4
AASDHPPT	0.808647	-0.040133	0.15	0.141	1	chr-11
AASS	8.66101e-26	0.0931992	0.54	0.39	2.73948e-21	chr-7
AATBC	0.103864	0.000587089	0.001	0	1	chr-21
AATF	1.01698e-16	0.0329389	0.196	0.121	3.21671e-12	chr-17
AATK	3.69052e-14	0.0309152	0.069	0.031	1.16731e-09	chr-17
ABALON	0.0394754	-0.00234347	0.001	0.003	1	chr-20
ABAT	1.32729e-81	0.144685	0.274	0.097	4.19821e-77	chr-16
ABCA1	1.94861e-06	0.0125153	0.458	0.36	0.0616345	chr-9
ABCA10	3.64769e-05	-0.125969	0.11	0.131	1	chr-17
ABCA12	3.60204e-06	0.00993943	0.017	0.006	0.113932	chr-2
ABCA13	0.00413424	0.00875125	0.025	0.016	1	chr-7
ABCA2	1.48456e-10	0.0183902	0.047	0.02	4.69565e-06	chr-9
ABCA3	1.34461e-12	0.0306472	0.083	0.044	4.25301e-08	chr-16
ABCA4	0.0141463	0.00505191	0.005	0.002	1	chr-1
ABCA5	0.0125191	-0.00783439	0.511	0.426	1	chr-17
ABCA6	5.65514e-46	-0.161842	0.062	0.155	1.78872e-41	chr-17
ABCA7	8.74506e-19	0.0381179	0.077	0.031	2.76606e-14	chr-19
ABCA8	1.00669e-11	-0.151512	0.429	0.443	3.18416e-07	chr-17
ABCA9	1.6895e-20	-0.120775	0.034	0.08	5.3439e-16	chr-17
ABCA9-AS1	0.0415155	-0.0128735	0.011	0.016	1	chr-17
ABCB1	6.94033e-10	-0.055437	0.015	0.037	2.19522e-05	chr-7
ABCB10	8.27974e-06	-9.33181e-05	0.236	0.179	0.261888	chr-1
ABCB11	0.00087276	0.00598791	0.009	0.003	1	chr-2
ABCB4	0.125557	-0.0640958	0.263	0.254	1	chr-7
ABCB5	0.00525348	0.0050785	0.011	0.005	1	chr-7
ABCB6	1.33335e-07	0.00898884	0.043	0.021	0.00421739	chr-2
ABCB8	1.70527e-10	0.0391983	0.242	0.174	5.39375e-06	chr-7
ABCB9	3.29458e-12	0.0193292	0.078	0.04	1.04208e-07	chr-12
ABCC1	2.23142e-184	0.332435	0.631	0.282	7.05799e-180	chr-16
ABCC10	1.23176e-07	0.0160413	0.137	0.095	0.00389605	chr-6
ABCC11	0.00433606	0.00629625	0.011	0.005	1	chr-16
ABCC12	0.00924273	0.00358496	0.003	0.001	1	chr-16
ABCC2	5.94817e-09	0.0122304	0.018	0.004	0.000188141	chr-10
ABCC3	3.45591e-05	0.00776504	0.008	0.002	1	chr-17
ABCC4	0.0854875	-0.0142189	0.061	0.051	1	chr-13
ABCC5	1.48926e-58	0.196463	0.77	0.616	4.71053e-54	chr-3
ABCC5-AS1	0.00150626	-0.0111729	0.01	0.019	1	chr-3
ABCC6	3.21093e-05	-0.0130153	0.012	0.024	1	chr-16
ABCC8	1.7448e-05	-0.0329595	0.069	0.094	0.55188	chr-11
ABCC9	3.15669e-36	-0.157604	0.671	0.659	9.9846e-32	chr-12
ABCD2	1.22832e-21	0.0568399	0.261	0.162	3.88518e-17	chr-12
ABCD3	3.81084e-07	0.044837	0.581	0.486	0.0120537	chr-1
ABCD4	0.423809	-0.0167063	0.127	0.117	1	chr-14
ABCE1	0.276149	-0.044898	0.143	0.142	1	chr-4
ABCF1	5.01664e-11	0.037974	0.136	0.088	1.58676e-06	chr-6
ABCF2	0.00102338	0.00316094	0.059	0.042	1	chr-7
ABCF3	0.906526	-0.0103296	0.072	0.07	1	chr-3
ABCG1	0.0210213	-0.0113484	0.155	0.131	1	chr-21
ABCG2	0.14092	-0.000472703	0.113	0.101	1	chr-4
ABCG4	0.30797	0.000246591	0.004	0.003	1	chr-11
ABCG5	0.236368	0.00238706	0.004	0.003	1	chr-2
ABCG8	0.250963	-0.000366529	0.003	0.002	1	chr-2
ABHD1	8.74042e-06	0.0142801	0.044	0.026	0.276459	chr-2
ABHD10	0.00404936	-0.00831533	0.15	0.12	1	chr-3
ABHD11	0.00685895	-0.0105962	0.014	0.023	1	chr-7
ABHD12	2.41206e-20	0.0549692	0.272	0.173	7.62935e-16	chr-20
ABHD12B	0.0500206	0.0029388	0.004	0.001	1	chr-14
ABHD13	0.0782733	-0.0194425	0.153	0.131	1	chr-13
ABHD14A	2.51788e-10	-0.0288058	0.015	0.037	7.96406e-06	chr-3
ABHD14B	0.0026744	-0.0301796	0.051	0.066	1	chr-3
ABHD15	0.00774078	0.00439051	0.014	0.007	1	chr-17
ABHD15-AS1	1.04127e-08	-0.0508013	0.089	0.126	0.000329355	chr-17
ABHD16A	2.43443e-09	0.0140107	0.075	0.042	7.70011e-05	chr-6
ABHD17A	1.32891e-12	0.0212354	0.073	0.036	4.20335e-08	chr-19
ABHD17B	2.34462e-05	-0.0073605	0.198	0.15	0.741603	chr-9
ABHD17C	0.00157037	0.00554397	0.097	0.075	1	chr-15
ABHD18	6.20058e-28	0.153038	0.745	0.58	1.96124e-23	chr-4
ABHD2	1.33862e-125	0.312829	0.723	0.476	4.23407e-121	chr-15
ABHD3	1.31164e-10	0.0184615	0.324	0.235	4.14872e-06	chr-18
ABHD4	0.235241	-0.00757236	0.042	0.036	1	chr-14
ABHD5	0.0156016	-0.0120666	0.138	0.114	1	chr-3
ABHD6	0.972884	-0.0243144	0.108	0.103	1	chr-3
ABHD8	0.388761	-0.00656607	0.055	0.05	1	chr-19
ABI1	0.0288727	-0.0778473	0.433	0.399	1	chr-10
ABI2	0.000109661	0.025577	0.608	0.504	1	chr-2
ABI3	0.000352892	-0.00556127	0.001	0.005	1	chr-17
ABI3BP	4.63267e-26	-0.162797	0.125	0.201	1.46531e-21	chr-3
ABITRAM	0.507689	-0.0117067	0.076	0.069	1	chr-9
ABL1	1.27747e-105	0.264763	0.752	0.49	4.04065e-101	chr-9
ABL2	6.87526e-59	0.155532	0.482	0.282	2.17464e-54	chr-1
ABLIM1	1.18216e-15	0.0323459	0.998	0.993	3.73917e-11	chr-10
ABLIM2	2.19183e-98	0.220117	0.472	0.223	6.93276e-94	chr-4
ABLIM3	7.40123e-07	-0.00585418	0.423	0.324	0.0234101	chr-5
ABO	0.000786039	-0.00473265	0.032	0.02	1	chr-9
ABR	1.51659e-172	0.345722	0.806	0.471	4.79697e-168	chr-17
ABRA	1.98475e-06	-0.0138093	0.242	0.182	0.0627777	chr-8
ABRACL	0.112604	-0.0108505	0.005	0.008	1	chr-6
ABRAXAS1	0.639196	-0.0151782	0.059	0.055	1	chr-4
ABRAXAS2	3.37105e-20	0.0498132	0.175	0.099	1.06626e-15	chr-10
ABT1	0.983071	-0.00688584	0.014	0.014	1	chr-6
ABTB1	0.539986	-0.013171	0.022	0.024	1	chr-3
ABTB2	4.40694e-46	0.174306	0.631	0.432	1.39392e-41	chr-11
AC000032.1	0.928987	-0.000136052	0	0	1	NA
AC000036.1	1	0	0	0	1	NA
AC000050.1	0.491537	-0.000881797	0	0.001	1	NA
AC000058.1	0.0046155	0.00188538	0.006	0.002	1	NA
AC000061.1	0.0218272	0.00374214	0.004	0.002	1	NA
AC000065.1	7.86447e-19	-0.0411926	0.013	0.046	2.48753e-14	NA
AC000065.2	0.000475343	0.00247208	0.018	0.008	1	NA
AC000068.1	0.898249	-0.000722935	0.003	0.003	1	NA
AC000068.2	0.0331497	-0.00155728	0	0.001	1	NA
AC000068.3	0.347874	0.000240032	0	0	1	NA
AC000072.1	0.103864	0.000788332	0.001	0	1	NA
AC000082.1	0.00139108	-0.00588708	0	0.002	1	NA
AC000085.1	2.37401e-22	0.0524476	0.109	0.049	7.509e-18	NA
AC000099.1	0.347874	0.000398746	0	0	1	NA
AC000113.1	6.36485e-06	0.00522546	0.007	0.001	0.20132	NA
AC000120.1	0.00027152	0.00417751	0.01	0.003	1	NA
AC000123.1	1	0	0	0	1	NA
AC000124.1	0.138627	0.00185151	0.002	0.001	1	NA
AC000372.1	0.00112427	0.00453441	0.004	0	1	NA
AC000403.1	0.132054	-0.0012549	0	0.001	1	NA
AC001226.1	0.83168	0.00025789	0.001	0.001	1	NA
AC002044.1	0.294799	-0.000557429	0.002	0.001	1	NA
AC002056.2	0.0650792	-0.0007654	0	0.001	1	NA
AC002057.1	0.191583	-0.0291323	0.066	0.072	1	NA
AC002057.2	1.71897e-09	-0.122851	0.333	0.36	5.43709e-05	NA
AC002059.1	0.103864	0.000436186	0.001	0	1	NA
AC002064.1	4.95134e-05	0.0038263	0.014	0.005	1	NA
AC002064.2	0.00139108	-0.00250177	0	0.002	1	NA
AC002066.1	1.99012e-40	0.174907	0.731	0.544	6.29475e-36	NA
AC002069.2	0.000121926	0.00865673	0.014	0.005	1	NA
AC002070.1	0.002196	0.00470064	0.032	0.021	1	NA
AC002072.1	0.211153	-1.22696e-06	0.011	0.008	1	NA
AC002074.1	0.0187662	0.00452141	0.005	0.002	1	NA
AC002074.2	0.215321	0.00169629	0.001	0.001	1	NA
AC002076.1	0.347874	0.000409812	0	0	1	NA
AC002091.1	0.555388	-0.00141532	0	0.001	1	NA
AC002091.2	1	0	0	0	1	NA
AC002094.2	1	0	0	0	1	NA
AC002094.4	0.00206693	0.00393209	0.005	0.001	1	NA
AC002101.1	0.214995	0.00156529	0.001	0.001	1	NA
AC002115.1	0.347874	0.000627377	0	0	1	NA
AC002116.2	3.79665e-05	0.00831231	0.015	0.006	1	NA
AC002128.1	0.321335	-0.0014956	0.002	0.003	1	NA
AC002128.2	0.0650792	-0.00106254	0	0.001	1	NA
AC002306.1	1	0	0	0	1	NA
AC002310.1	0.418257	-0.00414356	0.009	0.011	1	NA
AC002310.2	0.493228	-0.000321758	0.008	0.007	1	NA
AC002331.1	1.64587e-05	0.00569407	0.005	0	0.52059	NA
AC002347.1	0.0603584	0.000554606	0.001	0	1	NA
AC002347.2	0.0650792	-0.00133529	0	0.001	1	NA
AC002351.1	0.0841967	0.00087196	0.001	0	1	NA
AC002375.1	0.000602597	0.00446432	0.004	0.001	1	NA
AC002377.1	0.869074	-0.00874396	0.014	0.015	1	NA
AC002378.1	0.138627	0.00125242	0.002	0.001	1	NA
AC002383.1	0.0566525	0.0010147	0.002	0.001	1	NA
AC002398.1	0.132054	-0.000391042	0	0.001	1	NA
AC002398.2	0.0306648	0.000665244	0.008	0.004	1	NA
AC002401.1	0.959697	6.72376e-05	0.002	0.002	1	NA
AC002401.2	0.332575	0.000256866	0.001	0.001	1	NA
AC002401.3	0.103864	0.000488614	0.001	0	1	NA
AC002407.1	1	0	0	0	1	NA
AC002428.1	0.184241	0.00044763	0	0	1	NA
AC002429.2	6.06575e-69	-0.159627	0.071	0.197	1.9186e-64	NA
AC002451.1	1.88901e-20	0.0391077	0.167	0.091	5.97493e-16	NA
AC002454.1	0.0657822	0.00237665	0.009	0.006	1	NA
AC002456.1	0.00104092	0.00402999	0.017	0.008	1	NA
AC002458.1	0.00482227	-0.00211822	0	0.002	1	NA
AC002460.1	1	0	0	0	1	NA
AC002460.2	4.89372e-127	0.34158	0.746	0.496	1.54788e-122	NA
AC002463.1	1.44261e-159	-0.329542	0.118	0.347	4.56298e-155	NA
AC002465.1	0.103864	0.00166505	0.001	0	1	NA
AC002465.2	0.28699	-0.000520744	0	0	1	NA
AC002467.1	0.132861	-0.00149912	0.002	0.004	1	NA
AC002470.1	0.841229	-0.000241509	0.001	0.001	1	NA
AC002472.1	0.00314897	0.0056687	0.006	0.002	1	NA
AC002480.1	0.431274	-0.00521566	0.013	0.015	1	NA
AC002480.2	1.67121e-05	0.00564744	0.047	0.028	0.528603	NA
AC002511.1	0.287593	-0.00105437	0.001	0.002	1	NA
AC002511.2	0.00180036	0.0026582	0.003	0	1	NA
AC002519.1	1.17775e-07	0.00785396	0.022	0.007	0.00372521	NA
AC002542.6	0.759227	-0.000164971	0.001	0.001	1	NA
AC002546.1	0.266187	-0.00360381	0.003	0.004	1	NA
AC002550.1	0.190288	-0.00227304	0.001	0.002	1	NA
AC002550.2	1	0	0	0	1	NA
AC002551.1	0.00788683	0.00121687	0.002	0	1	NA
AC002553.1	0.105175	0.000174974	0.014	0.01	1	NA
AC002553.2	0.0157024	0.00177972	0.006	0.003	1	NA
AC002558.2	2.83687e-05	-0.00467122	0	0.005	0.897302	NA
AC002558.3	0.012575	-0.00331733	0.041	0.03	1	NA
AC003001.1	0.184241	0.00113771	0	0	1	NA
AC003005.2	0.00428202	0.00368346	0.004	0.001	1	NA
AC003035.1	0.000440584	0.00272999	0.004	0	1	NA
AC003035.2	1	0	0	0	1	NA
AC003043.1	0.00788683	0.00201439	0.002	0	1	NA
AC003043.2	0.833003	-0.00150737	0.001	0.001	1	NA
AC003044.1	0.00455694	0.00640982	0.004	0.001	1	NA
AC003070.2	0.132054	-0.000385645	0	0.001	1	NA
AC003077.1	0.665105	-0.000125166	0.001	0.001	1	NA
AC003084.1	0.132054	-0.000815981	0	0.001	1	NA
AC003086.1	0.0361934	0.00174257	0.003	0.001	1	NA
AC003092.1	0.416447	0.000435602	0.001	0.001	1	NA
AC003092.2	0.103864	0.00112568	0.001	0	1	NA
AC003093.1	0.0455747	0.00254372	0.004	0.002	1	NA
AC003101.1	9.76592e-12	0.0120953	0.016	0.001	3.08896e-07	NA
AC003101.2	0.826251	-0.000782859	0.001	0.002	1	NA
AC003102.1	0.205037	-0.00649279	0.008	0.01	1	NA
AC003659.1	0.000196029	-0.0211676	0.018	0.03	1	NA
AC003666.1	0.000441157	0.00649403	0.018	0.008	1	NA
AC003681.1	0.0333012	-0.0212832	0.034	0.042	1	NA
AC003682.1	5.08635e-05	0.00598087	0.036	0.021	1	NA
AC003684.1	0.609216	-0.000892578	0.001	0.002	1	NA
AC003685.1	1	0	0	0	1	NA
AC003688.2	0.0331497	-0.00116344	0	0.001	1	NA
AC003950.1	0.0603584	0.00110648	0.001	0	1	NA
AC003956.1	0.00565908	-0.00363337	0.002	0.006	1	NA
AC003958.2	0.899791	-5.81469e-05	0	0.001	1	NA
AC003965.1	0.857445	-0.000461739	0.001	0.001	1	NA
AC003965.2	0.28699	-0.000841947	0	0	1	NA
AC003973.1	0.554556	0.00063419	0.004	0.003	1	NA
AC003982.1	0.0194864	0.00130082	0.002	0	1	NA
AC003984.1	0.663961	0.00075806	0.001	0.001	1	NA
AC003986.1	1	0	0	0	1	NA
AC003986.2	1	0	0	0	1	NA
AC003986.3	0.28699	-0.000702769	0	0	1	NA
AC003988.1	0.000170374	0.00598874	0.004	0	1	NA
AC003991.1	0.00871064	0.00588181	0.013	0.007	1	NA
AC003991.2	0.0650792	-0.000742396	0	0.001	1	NA
AC003992.1	0.184241	0.000833721	0	0	1	NA
AC004000.1	0.28699	-0.000529662	0	0	1	NA
AC004009.1	0.244788	0.00113992	0.002	0.001	1	NA
AC004012.1	1	0	0	0	1	NA
AC004014.1	0.0120073	0.00264281	0.002	0	1	NA
AC004034.1	0.0151643	-0.00845271	0.008	0.014	1	NA
AC004039.1	7.95466e-30	-0.0463685	0.014	0.061	2.51606e-25	NA
AC004047.1	0.347874	0.000294164	0	0	1	NA
AC004052.1	0.00080991	0.00919656	0.009	0.003	1	NA
AC004053.1	0.72111	0.00110931	0.029	0.028	1	NA
AC004054.1	3.61655e-05	-0.0106699	0.007	0.016	1	NA
AC004066.2	0.103864	0.00120647	0.001	0	1	NA
AC004067.1	1	0	0	0	1	NA
AC004069.1	0.640337	-8.67861e-05	0.002	0.002	1	NA
AC004076.2	0.809609	-0.00444112	0.007	0.007	1	NA
AC004083.1	0.00146591	0.0092539	0.054	0.038	1	NA
AC004112.1	0.000110697	-0.0102581	0.011	0.021	1	NA
AC004130.2	0.330921	-0.00049212	0	0.001	1	NA
AC004148.1	0.0205791	-0.00647012	0.004	0.008	1	NA
AC004156.1	0.288604	0.000318902	0.003	0.002	1	NA
AC004158.1	7.66964e-05	0.00981434	0.012	0.004	1	NA
AC004160.1	0.000726308	0.00533851	0.027	0.016	1	NA
AC004160.2	1	0	0	0	1	NA
AC004217.1	0.00482227	-0.00161096	0	0.002	1	NA
AC004221.1	1	0	0	0	1	NA
AC004223.2	1	0	0	0	1	NA
AC004223.4	0.347874	0.000655811	0	0	1	NA
AC004231.1	0.0131667	0.00309052	0.006	0.002	1	NA
AC004231.3	0.156894	0.00235695	0.004	0.002	1	NA
AC004232.1	5.73181e-07	-0.00597759	0	0.007	0.0181297	NA
AC004233.1	0.245181	0.000770616	0.002	0.001	1	NA
AC004233.2	1.35784e-05	0.00733362	0.013	0.004	0.429485	NA
AC004233.3	0.0157514	0.00143727	0.003	0.001	1	NA
AC004241.1	0.00389498	-0.0123165	0.021	0.031	1	NA
AC004241.2	1	0	0	0	1	NA
AC004241.3	0.416447	0.000273054	0.001	0.001	1	NA
AC004241.4	1	0	0	0	1	NA
AC004253.1	1.15328e-08	-0.0199627	0.012	0.029	0.000364783	NA
AC004257.1	0.758719	0.000770344	0.001	0.001	1	NA
AC004263.1	0.507294	-4.7986e-05	0.001	0.001	1	NA
AC004263.2	0.0815358	-0.00364565	0.005	0.008	1	NA
AC004264.1	1	0	0	0	1	NA
AC004381.1	0.0126728	0.00364203	0.007	0.003	1	NA
AC004448.2	0.000229408	0.00930519	0.013	0.005	1	NA
AC004448.3	1	0	0	0	1	NA
AC004461.2	0.00491367	0.00383594	0.009	0.004	1	NA
AC004464.1	0.639084	1.14965e-06	0	0	1	NA
AC004466.1	0.381235	0.000124689	0.001	0	1	NA
AC004466.2	0.0603584	0.00107662	0.001	0	1	NA
AC004466.3	0.0331497	-0.000973619	0	0.001	1	NA
AC004470.1	0.609216	-0.000518554	0.001	0.002	1	NA
AC004471.1	0.728692	-0.000827148	0.004	0.004	1	NA
AC004471.2	0.0357278	0.000770675	0.001	0	1	NA
AC004477.1	0.195206	0.00157119	0.007	0.005	1	NA
AC004477.3	0.555687	-0.000368909	0	0.001	1	NA
AC004485.1	0.00428202	0.00329295	0.004	0.001	1	NA
AC004490.1	0.0841629	0.000892974	0.001	0	1	NA
AC004492.1	0.0605306	0.00223724	0.007	0.004	1	NA
AC004494.1	2.38358e-13	0.0233769	0.052	0.021	7.53926e-09	NA
AC004522.3	0.00924273	0.0034182	0.003	0.001	1	NA
AC004522.4	0.138583	0.00071268	0.002	0.001	1	NA
AC004522.5	0.917521	0.00188103	0.003	0.003	1	NA
AC004528.1	0.0194864	0.000897324	0.002	0	1	NA
AC004528.2	0.228835	0.000404309	0.001	0	1	NA
AC004540.1	0.485492	-0.00296065	0.014	0.016	1	NA
AC004540.2	1	0	0	0	1	NA
AC004542.1	0.28699	-0.000302859	0	0	1	NA
AC004542.2	0.00568002	-0.00342045	0.002	0.006	1	NA
AC004549.1	0.132054	-0.000599077	0	0.001	1	NA
AC004551.1	0.0387676	0.00352682	0.007	0.003	1	NA
AC004554.2	0.0170195	0.00533039	0.006	0.002	1	NA
AC004556.3	0.128954	0.00119899	0.002	0.001	1	NA
AC004584.1	0.330517	-0.000864944	0	0.001	1	NA
AC004584.3	0.000171257	0.00851603	0.034	0.02	1	NA
AC004585.1	0.28699	-0.000824946	0	0	1	NA
AC004590.1	0.184241	0.00118963	0	0	1	NA
AC004593.1	1.29861e-38	-0.0684267	0.018	0.078	4.10752e-34	NA
AC004593.2	0.0608155	-0.000300957	0.009	0.005	1	NA
AC004593.3	0.117207	-0.00642767	0.017	0.021	1	NA
AC004594.1	3.76685e-28	-0.0706482	0.022	0.072	1.19146e-23	NA
AC004596.1	0.790643	-0.0010963	0.006	0.006	1	NA
AC004597.1	0.28699	-0.000401762	0	0	1	NA
AC004637.1	1	0	0	0	1	NA
AC004672.1	0.00538417	-0.00431459	0.002	0.006	1	NA
AC004672.2	0.00112625	0.00201303	0.004	0	1	NA
AC004674.1	1	0	0	0	1	NA
AC004687.1	0.00906993	-0.0029766	0	0.002	1	NA
AC004690.2	0.117129	0.00164759	0.003	0.001	1	NA
AC004691.1	0.758549	9.88492e-05	0.001	0.001	1	NA
AC004702.1	0.285679	0.00014583	0.002	0.001	1	NA
AC004704.1	1.18889e-05	0.0148833	0.042	0.024	0.376047	NA
AC004706.1	0.132054	-0.000387039	0	0.001	1	NA
AC004706.3	0.00371947	0.0017331	0.004	0.001	1	NA
AC004765.1	0.00219987	-0.00500102	0.002	0.006	1	NA
AC004771.1	0.0357278	0.000652995	0.001	0	1	NA
AC004771.2	0.612482	-0.000566602	0.002	0.003	1	NA
AC004771.3	0.330618	-0.00056813	0	0.001	1	NA
AC004771.4	0.812013	-0.000889187	0.002	0.002	1	NA
AC004771.5	0.103864	0.000537333	0.001	0	1	NA
AC004784.1	0.0026133	0.00435387	0.01	0.004	1	NA
AC004797.1	5.29629e-08	-0.0247394	0.029	0.053	0.00167522	NA
AC004801.3	0.0167863	-0.00326615	0.003	0.006	1	NA
AC004801.4	0.842092	-0.000111467	0.001	0.001	1	NA
AC004801.5	0.103864	0.000421749	0.001	0	1	NA
AC004801.6	1	0	0	0	1	NA
AC004803.1	0.00196067	0.00460713	0.036	0.024	1	NA
AC004812.2	2.30122e-05	-0.0124697	0.009	0.02	0.727877	NA
AC004816.1	0.149279	0.000419723	0.006	0.004	1	NA
AC004816.2	0.0650792	-0.00226207	0	0.001	1	NA
AC004817.3	0.0603584	0.00068277	0.001	0	1	NA
AC004817.5	0.00711864	0.00880388	0.021	0.013	1	NA
AC004825.2	0.105252	-0.0027263	0.001	0.002	1	NA
AC004825.3	1.81836e-09	-0.0184512	0.008	0.025	5.75148e-05	NA
AC004828.1	0.913239	-0.0127273	0.031	0.031	1	NA
AC004828.2	3.21476e-10	-0.0423111	0.028	0.054	1.01683e-05	NA
AC004830.2	0.000562106	0.00823711	0.014	0.006	1	NA
AC004832.1	0.0566915	0.00116273	0.002	0.001	1	NA
AC004832.4	0.382801	0.000331998	0.003	0.002	1	NA
AC004832.5	0.840982	-0.000447553	0.001	0.001	1	NA
AC004832.6	0.132054	-0.000852648	0	0.001	1	NA
AC004834.1	1.8029e-19	0.031233	0.066	0.023	5.70256e-15	NA
AC004835.1	0.0156627	0.00553171	0.003	0.001	1	NA
AC004837.2	4.76082e-06	-0.00536352	0	0.006	0.150585	NA
AC004837.4	0.811411	-0.00392385	0.014	0.014	1	NA
AC004839.2	1.72857e-22	-0.0248971	0.002	0.028	5.46746e-18	NA
AC004846.1	0.193126	0.000898907	0.002	0.001	1	NA
AC004846.2	0.184241	0.000271006	0	0	1	NA
AC004847.1	1	0	0	0	1	NA
AC004852.2	2.9031e-06	0.00767691	0.008	0.001	0.091825	NA
AC004854.2	0.0607509	0.00163231	0.011	0.007	1	NA
AC004862.1	1.3359e-05	0.00812947	0.007	0.001	0.422545	NA
AC004865.2	0.104986	0.00025578	0.003	0.001	1	NA
AC004870.2	0.156707	0.00261555	0.004	0.002	1	NA
AC004870.3	0.0240041	0.00352839	0.004	0.001	1	NA
AC004870.4	1.05569e-13	0.0179876	0.025	0.005	3.33914e-09	NA
AC004875.1	0.0315888	0.00233382	0.002	0	1	NA
AC004877.1	0.0214136	0.00102977	0.001	0	1	NA
AC004879.1	0.0137873	0.0331537	0.698	0.606	1	NA
AC004882.1	1	0	0	0	1	NA
AC004882.3	0.00501453	-0.00224573	0.001	0.004	1	NA
AC004884.2	6.48648e-06	-0.00950511	0.002	0.01	0.205167	NA
AC004889.1	0.0123175	-0.00992647	0.009	0.015	1	NA
AC004893.3	0.248195	-0.00252797	0.002	0.003	1	NA
AC004895.1	0.0500728	0.00224074	0.004	0.001	1	NA
AC004900.1	1	0	0	0	1	NA
AC004906.1	0.184241	0.00102868	0	0	1	NA
AC004908.1	0.0141229	-0.00334755	0.002	0.005	1	NA
AC004908.2	1.07186e-11	-0.0168083	0.004	0.02	3.39029e-07	NA
AC004908.3	0.369831	-0.0038988	0.004	0.005	1	NA
AC004917.1	2.20522e-25	0.0364146	0.052	0.01	6.97512e-21	NA
AC004918.1	0.00332319	0.00160181	0.027	0.017	1	NA
AC004918.4	0.981408	-0.00184819	0.006	0.006	1	NA
AC004921.1	0.28699	-0.000249164	0	0	1	NA
AC004921.2	0.0360473	0.0032067	0.003	0.001	1	NA
AC004923.4	0.116948	0.00107707	0.003	0.001	1	NA
AC004930.1	0.929267	0.000174304	0	0	1	NA
AC004936.1	6.76543e-08	0.0120273	0.009	0.001	0.00213991	NA
AC004938.2	0.639991	-0.000380472	0.002	0.002	1	NA
AC004941.1	1	0	0	0	1	NA
AC004943.1	0.00746618	0.0021697	0.003	0	1	NA
AC004943.2	2.40043e-17	0.0332832	0.088	0.04	7.59255e-13	NA
AC004943.3	1	0	0	0	1	NA
AC004946.1	0.0120329	0.00307425	0.002	0	1	NA
AC004946.2	0.491537	-0.00112757	0	0.001	1	NA
AC004947.1	0.758888	-3.10686e-05	0.001	0.001	1	NA
AC004947.3	0.184241	0.000562337	0	0	1	NA
AC004949.1	0.0011804	-0.0202125	0.026	0.038	1	NA
AC004951.1	4.63609e-170	0.256753	0.347	0.081	1.46639e-165	NA
AC004969.1	3.32321e-19	-0.0235188	0.003	0.025	1.05113e-14	NA
AC004973.1	0.00744058	0.00296956	0.003	0	1	NA
AC004974.1	0.0732058	-0.00138718	0	0.001	1	NA
AC004982.1	0.265124	-0.000848845	0.011	0.008	1	NA
AC004982.2	0.212309	-0.0125255	0.029	0.033	1	NA
AC004988.1	0.0858705	-0.00594932	0.005	0.008	1	NA
AC004990.1	0.928987	-0.000124953	0	0	1	NA
AC004994.1	0.374349	-0.000936927	0.001	0.001	1	NA
AC005005.3	0.347874	9.47242e-05	0	0	1	NA
AC005005.4	7.19702e-06	0.00804136	0.01	0.002	0.227642	NA
AC005006.1	0.215191	0.001734	0.001	0.001	1	NA
AC005008.2	0.0120124	0.00366121	0.002	0	1	NA
AC005009.2	4.04979e-05	0.00340119	0.013	0.004	1	NA
AC005013.1	0.347874	0.000134311	0	0	1	NA
AC005014.2	0.813254	-0.000171489	0.002	0.002	1	NA
AC005014.4	5.93792e-17	-0.018933	0.004	0.025	1.87817e-12	NA
AC005019.2	0.184241	0.000640909	0	0	1	NA
AC005021.1	1	0	0	0	1	NA
AC005034.2	0.347874	0.000244906	0	0	1	NA
AC005034.4	0.00788683	0.00159788	0.002	0	1	NA
AC005034.5	0.0341848	0.00147336	0.004	0.001	1	NA
AC005034.6	0.380967	-0.00133349	0.022	0.019	1	NA
AC005037.1	2.95089e-180	0.37489	0.508	0.206	9.33368e-176	NA
AC005040.2	0.0145772	0.0028737	0.003	0.001	1	NA
AC005041.4	0.132054	-0.000355847	0	0.001	1	NA
AC005041.5	2.67563e-05	-0.0172691	0.016	0.03	0.8463	NA
AC005042.2	0.000472747	0.00625081	0.005	0.001	1	NA
AC005046.1	0.183331	-0.00237725	0.004	0.007	1	NA
AC005050.1	0.144287	-0.000888001	0.007	0.005	1	NA
AC005050.2	1	0	0	0	1	NA
AC005050.3	0.0036617	0.00383299	0.008	0.003	1	NA
AC005052.2	2.55889e-09	0.0152822	0.052	0.025	8.09377e-05	NA
AC005062.1	1.52412e-07	0.0100839	0.013	0.003	0.00482079	NA
AC005064.1	2.28307e-09	-0.0150274	0.006	0.022	7.22136e-05	NA
AC005070.3	7.11361e-06	-0.0111385	0.004	0.014	0.225003	NA
AC005071.1	0.0214136	0.000973111	0.001	0	1	NA
AC005072.1	4.91293e-27	0.0450124	0.076	0.022	1.55396e-22	NA
AC005076.1	0.00482227	-0.00270764	0	0.002	1	NA
AC005081.1	0.469684	-0.00111345	0.005	0.006	1	NA
AC005082.1	0.0650792	-0.000733866	0	0.001	1	NA
AC005082.2	0.184025	0.0014043	0.004	0.002	1	NA
AC005086.2	0.0172243	-0.00109881	0	0.001	1	NA
AC005089.1	0.48327	-0.00142181	0.004	0.003	1	NA
AC005091.1	0.00101839	0.00402575	0.019	0.01	1	NA
AC005096.1	0.726375	-0.00134326	0.004	0.004	1	NA
AC005100.1	0.347958	0.00110679	0.002	0.001	1	NA
AC005100.2	9.7098e-05	0.00678163	0.005	0.001	1	NA
AC005104.3	3.38656e-05	-0.00831871	0.003	0.01	1	NA
AC005144.1	0.00114934	0.00462638	0.005	0.001	1	NA
AC005153.1	0.0995863	0.000235562	0.008	0.005	1	NA
AC005154.3	0.0650792	-0.000968514	0	0.001	1	NA
AC005154.4	0.659195	-0.000639139	0.016	0.015	1	NA
AC005162.1	0.00500031	-0.00331312	0.001	0.004	1	NA
AC005162.2	1	0	0	0	1	NA
AC005162.3	6.71082e-22	-0.0521301	0.016	0.055	2.12263e-17	NA
AC005165.1	0.743618	0.00173269	0.006	0.005	1	NA
AC005165.3	0.184241	0.00106605	0	0	1	NA
AC005180.1	0.000222889	0.00747754	0.015	0.006	1	NA
AC005180.2	0.343789	-0.000689185	0.002	0.003	1	NA
AC005197.1	1	0	0	0	1	NA
AC005208.1	0.0178143	0.00395057	0.009	0.005	1	NA
AC005209.1	0.491718	-0.000808509	0	0.001	1	NA
AC005220.1	0.347874	0.000183709	0	0	1	NA
AC005224.2	5.82775e-26	0.0536054	0.076	0.023	1.84332e-21	NA
AC005224.3	1.11048e-05	0.00319672	0.009	0.002	0.351245	NA
AC005225.1	1	0	0	0	1	NA
AC005225.2	1.29927e-68	0.162323	0.313	0.14	4.10959e-64	NA
AC005225.3	8.75828e-19	0.0229845	0.056	0.018	2.77024e-14	NA
AC005229.4	0.28699	-0.000571142	0	0	1	NA
AC005229.5	0.014588	0.00258508	0.003	0.001	1	NA
AC005234.1	0.491899	0.00032688	0	0.001	1	NA
AC005234.2	0.138412	0.00166795	0.001	0	1	NA
AC005237.1	0.0708854	-0.0128712	0.036	0.043	1	NA
AC005244.2	0.228835	0.00100982	0.001	0	1	NA
AC005252.4	0.0145021	0.00430923	0.003	0.001	1	NA
AC005253.1	2.08466e-05	-0.0063684	0.003	0.01	0.659377	NA
AC005253.2	1	0	0	0	1	NA
AC005261.1	4.43554e-19	0.0295187	0.246	0.152	1.40296e-14	NA
AC005261.2	0.330719	-0.000789215	0	0.001	1	NA
AC005264.1	0.555687	-0.000745047	0	0.001	1	NA
AC005277.1	1	0	0	0	1	NA
AC005277.2	1	0	0	0	1	NA
AC005280.1	0.00425801	0.00423314	0.004	0.001	1	NA
AC005280.2	0.138318	0.00198511	0.002	0.001	1	NA
AC005288.1	0.00175219	-0.00612537	0.004	0.01	1	NA
AC005291.1	0.056672	0.000843533	0.002	0.001	1	NA
AC005291.2	0.00985216	-0.00526275	0.003	0.007	1	NA
AC005293.1	0.493571	-0.00669515	0.012	0.014	1	NA
AC005301.2	0.184241	0.00128752	0	0	1	NA
AC005304.1	1	0	0	0	1	NA
AC005304.2	0.28699	-0.000247395	0	0	1	NA
AC005304.3	1	0	0	0	1	NA
AC005306.1	0.163063	-0.000338316	0.008	0.006	1	NA
AC005307.1	0.0603584	0.00150386	0.001	0	1	NA
AC005323.1	0.0654957	0.00207599	0.004	0.002	1	NA
AC005323.2	0.0264748	0.00496885	0.008	0.004	1	NA
AC005324.1	0.380829	0.00129298	0.001	0	1	NA
AC005324.5	0.491718	-0.000230912	0	0.001	1	NA
AC005329.1	0.576292	-0.00253268	0.004	0.005	1	NA
AC005329.2	0.132054	-0.000998818	0	0.001	1	NA
AC005329.3	0.246319	0.000361903	0.004	0.002	1	NA
AC005332.1	0.494037	0.000308689	0.004	0.003	1	NA
AC005332.2	0.0417206	0.000928683	0.006	0.003	1	NA
AC005332.3	0.0397003	-0.013408	0.018	0.025	1	NA
AC005332.4	0.629798	-0.00534761	0.028	0.025	1	NA
AC005332.5	7.81144e-11	0.0126933	0.027	0.008	2.47076e-06	NA
AC005332.6	6.69391e-20	0.0300441	0.085	0.035	2.11728e-15	NA
AC005332.7	0.858275	-0.000353619	0.001	0.001	1	NA
AC005339.1	0.0357278	0.00125661	0.001	0	1	NA
AC005342.1	0.00325284	0.0195203	0.124	0.102	1	NA
AC005342.2	1	0	0	0	1	NA
AC005343.1	0.725248	0.00118209	0.004	0.004	1	NA
AC005343.4	0.184241	0.00122985	0	0	1	NA
AC005344.1	0.0214136	0.000877806	0.001	0	1	NA
AC005355.1	5.01329e-75	0.128148	0.22	0.07	1.5857e-70	NA
AC005358.1	1.85091e-84	-0.207145	0.077	0.22	5.85442e-80	NA
AC005358.2	0.00028923	-0.0122755	0.01	0.019	1	NA
AC005363.2	1.57873e-09	-0.007907	0	0.008	4.99352e-05	NA
AC005381.1	0.0732303	0.000400981	0.004	0.002	1	NA
AC005383.1	0.28699	-0.0006241	0	0	1	NA
AC005387.2	0.593946	0.000817191	0.002	0.002	1	NA
AC005392.2	1	0	0	0	1	NA
AC005392.3	0.381235	0.000483654	0.001	0	1	NA
AC005393.1	0.00928477	0.00135929	0.007	0.003	1	NA
AC005394.1	4.98503e-11	0.0152893	0.019	0.003	1.57676e-06	NA
AC005400.1	1.92515e-188	-0.438415	0.214	0.459	6.08925e-184	NA
AC005410.2	0.331136	-0.000639197	0.01	0.008	1	NA
AC005414.1	4.00533e-10	-0.0391135	0.033	0.061	1.26689e-05	NA
AC005476.2	0.0519739	0.0016578	0.007	0.003	1	NA
AC005479.1	0.132054	-0.0003971	0	0.001	1	NA
AC005479.2	0.0566915	0.00123141	0.002	0.001	1	NA
AC005480.1	0.00130787	-0.0322954	0.07	0.087	1	NA
AC005481.1	0.28699	-0.000705841	0	0	1	NA
AC005482.1	0.103864	0.00130936	0.001	0	1	NA
AC005486.1	0.0178112	0.00468008	0.014	0.009	1	NA
AC005487.1	2.99898e-05	0.00704446	0.011	0.003	0.948579	NA
AC005495.2	0.0172243	-0.00102413	0	0.001	1	NA
AC005498.1	0.228921	-9.14344e-05	0.001	0	1	NA
AC005498.2	0.959807	0.000116864	0.002	0.002	1	NA
AC005498.3	3.35032e-09	0.0153075	0.081	0.047	0.000105971	NA
AC005519.1	0.535243	-0.00016387	0.005	0.004	1	NA
AC005520.2	6.67511e-05	0.00607536	0.075	0.052	1	NA
AC005520.3	0.159933	0.00023462	0.004	0.002	1	NA
AC005520.5	1.07456e-41	-0.06828	0.017	0.079	3.39885e-37	NA
AC005522.1	0.0732711	-0.000942701	0	0.001	1	NA
AC005523.1	0.226441	0.00138222	0.005	0.003	1	NA
AC005523.2	2.93563e-20	-0.0306747	0.005	0.033	9.2854e-16	NA
AC005529.1	0.184241	0.00023204	0	0	1	NA
AC005532.1	2.27008e-08	0.00921347	0.036	0.016	0.000718026	NA
AC005534.1	0.0799256	0.000314783	0.003	0.001	1	NA
AC005537.1	4.09727e-07	0.0146142	0.014	0.003	0.0129597	NA
AC005538.1	0.184241	0.00108854	0	0	1	NA
AC005540.1	0.595879	0.000520756	0.001	0.001	1	NA
AC005546.1	0.0145396	0.00290063	0.003	0.001	1	NA
AC005548.1	0.0029696	0.00324556	0.002	0	1	NA
AC005550.1	1	0	0	0	1	NA
AC005550.2	0.0296702	-0.00427182	0.001	0.003	1	NA
AC005562.1	1.20313e-14	0.0366617	0.207	0.132	3.80551e-10	NA
AC005580.1	0.00288754	0.00331947	0.003	0	1	NA
AC005586.1	0.271906	-0.00246971	0.003	0.004	1	NA
AC005586.2	0.00275728	0.00273472	0.004	0.001	1	NA
AC005592.1	1	0	0	0	1	NA
AC005594.1	1	0	0	0	1	NA
AC005597.1	0.0393426	-0.00138074	0	0.002	1	NA
AC005599.1	1.98025e-05	0.00901567	0.011	0.003	0.626352	NA
AC005606.1	1	0	0	0	1	NA
AC005606.2	0.0357278	0.000984605	0.001	0	1	NA
AC005609.1	1	0	0	0	1	NA
AC005609.5	0.555537	-0.0012677	0	0.001	1	NA
AC005614.1	0.138318	0.0016701	0.002	0.001	1	NA
AC005616.1	0.0357278	0.00134125	0.001	0	1	NA
AC005618.1	0.231729	-0.00381916	0.034	0.029	1	NA
AC005618.2	0.103864	0.000620403	0.001	0	1	NA
AC005618.3	0.381235	-0.00030757	0.001	0	1	NA
AC005618.4	0.00977742	0.003848	0.022	0.014	1	NA
AC005632.3	0.732743	-0.0054468	0.016	0.015	1	NA
AC005632.5	0.0214136	0.00183766	0.001	0	1	NA
AC005632.6	6.4347e-05	0.00511483	0.01	0.003	1	NA
AC005670.1	0.458484	-0.00158717	0.002	0.003	1	NA
AC005670.3	5.72415e-28	0.0827121	0.433	0.286	1.81055e-23	NA
AC005674.1	0.184241	0.00106906	0	0	1	NA
AC005674.2	5.49331e-05	0.00509332	0.033	0.018	1	NA
AC005682.2	0.336302	6.544e-05	0.004	0.003	1	NA
AC005692.1	1.33374e-07	-0.0079179	0.001	0.01	0.00421862	NA
AC005692.2	0.257787	-0.00230704	0.002	0.004	1	NA
AC005692.3	2.92067e-12	-0.0446157	0.027	0.058	9.23808e-08	NA
AC005695.1	0.841598	-0.000282342	0.001	0.001	1	NA
AC005695.2	1.04805e-08	-0.0216374	0.014	0.033	0.000331498	NA
AC005695.3	0.00183277	0.00209951	0.003	0	1	NA
AC005696.1	2.07362e-12	-0.0235482	0.013	0.037	6.55885e-08	NA
AC005696.2	0.832121	0.000142266	0.001	0.001	1	NA
AC005696.3	0.347874	0.000384283	0	0	1	NA
AC005696.4	0.0102253	0.00242845	0.004	0.001	1	NA
AC005697.2	0.273928	-0.00135967	0.003	0.004	1	NA
AC005699.1	0.460563	-0.0160046	0.064	0.058	1	NA
AC005703.1	0.347874	0.000229819	0	0	1	NA
AC005703.2	0.526037	-0.000712185	0.004	0.003	1	NA
AC005703.3	0.453964	0.000683276	0.002	0.002	1	NA
AC005703.4	1.35222e-05	0.00428165	0.011	0.003	0.427706	NA
AC005703.7	0.307089	-0.00534271	0.007	0.01	1	NA
AC005722.3	0.138412	0.000796702	0.001	0	1	NA
AC005725.1	0.28699	-0.000663767	0	0	1	NA
AC005726.1	1.68048e-18	0.0324627	0.057	0.019	5.31537e-14	NA
AC005726.2	0.759058	-0.000196075	0.001	0.001	1	NA
AC005726.3	0.404017	-0.000261066	0.002	0.001	1	NA
AC005726.4	0.759227	-0.000823982	0.001	0.001	1	NA
AC005726.5	2.51702e-14	-0.0179749	0.003	0.021	7.96134e-10	NA
AC005730.2	1	0	0	0	1	NA
AC005730.3	0.680985	-0.000454861	0.003	0.002	1	NA
AC005736.1	0.000781572	0.00535228	0.01	0.003	1	NA
AC005736.2	0.347874	0.000580105	0	0	1	NA
AC005740.3	0.00366261	-0.0143283	0.022	0.033	1	NA
AC005740.4	1	0	0	0	1	NA
AC005740.5	0.0416609	0.00196165	0.004	0.002	1	NA
AC005746.1	0.129172	0.00088397	0.002	0.001	1	NA
AC005746.2	0.000148414	-0.0120642	0.011	0.021	1	NA
AC005753.1	0.928987	-0.000392798	0	0	1	NA
AC005753.2	0.282728	-0.00604499	0.003	0.005	1	NA
AC005753.3	0.0650792	-0.00125275	0	0.001	1	NA
AC005757.1	0.28699	-0.000233998	0	0	1	NA
AC005759.1	0.287218	0.000905386	0.029	0.025	1	NA
AC005772.1	0.0360904	0.00170903	0.002	0.001	1	NA
AC005772.2	0.075815	0.00404012	0.008	0.005	1	NA
AC005774.2	0.00906993	-0.00155604	0	0.002	1	NA
AC005775.1	0.0908893	0.001226	0.006	0.003	1	NA
AC005776.2	0.184241	0.00074115	0	0	1	NA
AC005785.1	0.876815	-0.00032114	0.001	0.001	1	NA
AC005786.2	0.28699	-0.000173537	0	0	1	NA
AC005786.3	2.80285e-05	0.00779506	0.017	0.007	0.886542	NA
AC005803.1	0.555388	-0.000551494	0	0.001	1	NA
AC005808.1	0.00198243	0.00355365	0.005	0.001	1	NA
AC005821.1	7.20766e-05	0.00790419	0.007	0.001	1	NA
AC005828.1	0.244508	0.00223752	0.002	0.001	1	NA
AC005828.3	0.556285	0.000182808	0	0.001	1	NA
AC005832.1	0.0603584	0.00134694	0.001	0	1	NA
AC005833.2	0.473046	-0.00280263	0.003	0.004	1	NA
AC005837.1	4.12625e-05	-0.00732481	0.003	0.01	1	NA
AC005837.4	0.00015027	0.00946704	0.014	0.006	1	NA
AC005838.2	0.11747	-0.00791167	0.011	0.015	1	NA
AC005840.2	2.97864e-06	0.0073815	0.014	0.004	0.0942144	NA
AC005840.4	0.594926	0.000196406	0.002	0.002	1	NA
AC005841.1	0.00482894	0.00157471	0.002	0	1	NA
AC005842.1	0.0020962	0.00633929	0.006	0.002	1	NA
AC005845.1	0.347874	0.000179504	0	0	1	NA
AC005856.1	7.49277e-08	-0.021542	0.009	0.024	0.00236996	NA
AC005863.1	0.103864	0.000723138	0.001	0	1	NA
AC005865.2	0.0124683	0.00631641	0.058	0.045	1	NA
AC005871.2	0.0042625	0.00427835	0.004	0.001	1	NA
AC005884.1	0.00666885	-0.0130397	0.012	0.02	1	NA
AC005888.1	1	0	0	0	1	NA
AC005899.1	2.52622e-32	0.0439132	0.073	0.017	7.99044e-28	NA
AC005899.3	1	0	0	0	1	NA
AC005899.5	3.30353e-84	0.107746	0.16	0.028	1.04491e-79	NA
AC005899.6	1.55184e-19	0.0333657	0.055	0.017	4.90846e-15	NA
AC005899.7	5.7678e-14	0.0142423	0.052	0.02	1.82436e-09	NA
AC005899.8	0.155421	-0.00950411	0.029	0.034	1	NA
AC005906.2	2.60526e-05	0.00881347	0.007	0.001	0.824043	NA
AC005906.3	0.491899	-9.33968e-05	0	0.001	1	NA
AC005908.3	0.639084	0.000106361	0	0	1	NA
AC005909.1	0.184241	0.000835967	0	0	1	NA
AC005909.2	0.00255753	0.00824037	0.01	0.004	1	NA
AC005911.1	0.0650792	-0.00054346	0	0.001	1	NA
AC005912.2	0.00314412	0.00266958	0.006	0.002	1	NA
AC005914.1	0.507294	-0.000531012	0.001	0.001	1	NA
AC005920.1	0.00234822	0.00529292	0.008	0.003	1	NA
AC005920.2	1.2994e-07	-0.0266378	0.033	0.056	0.00411002	NA
AC005920.3	0.015653	0.00274125	0.004	0.001	1	NA
AC005920.4	0.28699	-0.000240418	0	0	1	NA
AC005921.2	2.7223e-34	-0.0340373	0.001	0.038	8.61063e-30	NA
AC005921.4	0.00926009	0.00133522	0.003	0.001	1	NA
AC005944.1	0.358855	9.22446e-05	0.004	0.002	1	NA
AC005954.1	0.0603584	0.00096247	0.001	0	1	NA
AC005954.2	0.585511	0.000228104	0.001	0.001	1	NA
AC005962.1	0.601984	0.000443962	0.001	0.001	1	NA
AC005962.2	1	0	0	0	1	NA
AC005972.3	0.00137032	0.00614872	0.007	0.002	1	NA
AC005993.1	0.246786	-0.000239809	0.004	0.002	1	NA
AC005996.1	1	0	0	0	1	NA
AC005998.1	0.75821	0.00104311	0.001	0.001	1	NA
AC005999.2	3.30153e-09	0.0133683	0.017	0.003	0.000104427	NA
AC006001.2	2.31534e-121	0.203397	0.371	0.129	7.32343e-117	NA
AC006004.1	0.0120329	0.00217986	0.002	0	1	NA
AC006007.1	8.67831e-06	-0.00840045	0	0.005	0.274495	NA
AC006008.1	0.000634891	0.00378499	0.008	0.003	1	NA
AC006013.1	0.022957	0.00161319	0.003	0.001	1	NA
AC006017.1	0.614415	-0.00101168	0.003	0.003	1	NA
AC006019.1	1	0	0	0	1	NA
AC006019.3	0.639084	0.000461415	0	0	1	NA
AC006027.1	0.28699	-0.000486197	0	0	1	NA
AC006033.2	1	0	0	0	1	NA
AC006040.1	0.184241	0.000554172	0	0	1	NA
AC006041.1	0.664762	-0.000592378	0.001	0.001	1	NA
AC006041.2	1.05412e-20	0.0255699	0.043	0.009	3.33419e-16	NA
AC006042.1	0.470914	-0.00298724	0.004	0.005	1	NA
AC006042.2	1.26941e-11	-0.0190662	0.006	0.024	4.01513e-07	NA
AC006042.4	0.877296	-3.97262e-05	0.001	0.001	1	NA
AC006043.1	0.0362352	0.000909512	0.003	0.001	1	NA
AC006058.1	1	0	0	0	1	NA
AC006059.1	6.32698e-05	-0.0677575	0.181	0.207	1	NA
AC006059.4	0.0446529	-0.00137438	0.002	0.004	1	NA
AC006059.5	0.839826	-0.000263913	0.009	0.008	1	NA
AC006062.1	0.869085	-0.00033342	0.003	0.002	1	NA
AC006063.3	0.0357278	0.00296725	0.001	0	1	NA
AC006064.1	0.595037	-0.00177134	0.003	0.004	1	NA
AC006064.2	1.20299e-16	-0.0258332	0.008	0.033	3.80506e-12	NA
AC006064.3	0.0452173	0.00278044	0.007	0.004	1	NA
AC006064.4	0.023756	-0.00308136	0.001	0.003	1	NA
AC006064.5	0.562385	-0.00252552	0.005	0.004	1	NA
AC006065.4	1	0	0	0	1	NA
AC006076.1	0.000275065	0.0067763	0.004	0	1	NA
AC006111.1	0.00482894	0.00225597	0.002	0	1	NA
AC006111.2	0.294265	0.000243084	0.002	0.001	1	NA
AC006111.3	0.28699	-0.000180104	0	0	1	NA
AC006112.1	1	0	0	0	1	NA
AC006115.2	1.49091e-10	0.0296062	0.154	0.101	4.71576e-06	NA
AC006116.10	0.00464146	0.00187163	0.003	0	1	NA
AC006116.11	0.211714	0.0006089	0.004	0.002	1	NA
AC006116.4	0.899988	-1.41738e-05	0	0.001	1	NA
AC006116.5	0.000599158	0.00244429	0.011	0.005	1	NA
AC006116.6	0.215251	-0.000712698	0.003	0.002	1	NA
AC006116.8	0.365671	-0.00834828	0.03	0.033	1	NA
AC006116.9	0.232859	-0.00124638	0.001	0.002	1	NA
AC006130.1	0.14134	-0.000991109	0.003	0.005	1	NA
AC006130.3	0.157799	0.00108963	0.004	0.002	1	NA
AC006141.1	2.98435e-28	0.0403353	0.13	0.054	9.43948e-24	NA
AC006144.2	0.600943	-0.000347857	0.001	0.001	1	NA
AC006145.1	2.92174e-10	-0.0205273	0.01	0.028	9.24147e-06	NA
AC006148.1	1.13763e-08	0.0196844	0.025	0.008	0.000359832	NA
AC006148.2	0.0214136	0.00227163	0.001	0	1	NA
AC006150.1	1	0	0	0	1	NA
AC006157.1	0.00788683	0.00114755	0.002	0	1	NA
AC006159.1	0.000139494	-0.013289	0.006	0.014	1	NA
AC006160.1	0.0688699	-0.00982	0.014	0.019	1	NA
AC006197.2	1.25804e-12	0.0189944	0.032	0.009	3.97919e-08	NA
AC006206.1	0.928987	-0.000247517	0	0	1	NA
AC006206.2	0.163898	0.000857597	0.015	0.011	1	NA
AC006207.1	0.184241	0.000197274	0	0	1	NA
AC006213.1	0.123583	-0.00192183	0.001	0.003	1	NA
AC006213.2	1.27795e-36	-0.059882	0.023	0.085	4.04216e-32	NA
AC006213.3	0.0962672	-0.0227031	0.17	0.146	1	NA
AC006213.4	0.0142083	0.0020836	0.005	0.002	1	NA
AC006213.5	0.103864	0.000505052	0.001	0	1	NA
AC006213.7	0.586113	-0.000381	0.004	0.003	1	NA
AC006230.1	4.3618e-26	0.0393439	0.058	0.013	1.37964e-21	NA
AC006237.1	0.28699	-0.000167789	0	0	1	NA
AC006238.1	0.28699	-0.000771383	0	0	1	NA
AC006249.1	0.00171585	0.00333318	0.03	0.019	1	NA
AC006252.1	0.347884	0.000423598	0.002	0.001	1	NA
AC006262.1	0.00183277	0.00223089	0.003	0	1	NA
AC006262.2	0.347589	0.00132967	0.002	0.001	1	NA
AC006270.1	0.322635	-0.000708725	0.002	0.003	1	NA
AC006273.1	0.28699	-0.000586991	0	0	1	NA
AC006288.1	0.205343	0.000190481	0.005	0.003	1	NA
AC006296.2	0.012951	0.00215619	0.002	0	1	NA
AC006296.3	7.26576e-05	0.00672659	0.007	0.001	1	NA
AC006299.1	1.90358e-24	0.0624766	0.405	0.264	6.02102e-20	NA
AC006305.1	0.00314618	0.00716789	0.006	0.002	1	NA
AC006305.3	0.228663	0.00127367	0.001	0	1	NA
AC006329.1	0.0214136	0.0010527	0.001	0	1	NA
AC006333.1	0.574657	-0.0292574	0.344	0.314	1	NA
AC006333.2	0.000199652	-0.0113014	0.007	0.016	1	NA
AC006348.1	0.0564474	0.00252212	0.003	0.001	1	NA
AC006355.2	1.57449e-21	-0.0329887	0.008	0.04	4.98011e-17	NA
AC006369.1	0.123865	-0.0291849	0.246	0.216	1	NA
AC006369.2	0.304442	-0.0049535	0.007	0.009	1	NA
AC006372.1	1	0	0	0	1	NA
AC006372.2	1	0	0	0	1	NA
AC006372.3	0.0120483	0.00188109	0.002	0	1	NA
AC006378.1	0.000564335	-0.0107266	0.006	0.014	1	NA
AC006387.1	5.17987e-15	-0.0345659	0.013	0.04	1.63839e-10	NA
AC006398.1	0.899397	-0.000877683	0	0.001	1	NA
AC006427.2	0.012951	0.00230402	0.002	0	1	NA
AC006435.1	1	0	0	0	1	NA
AC006435.2	0.00201525	0.00291472	0.007	0.002	1	NA
AC006435.3	0.347874	0.000220798	0	0	1	NA
AC006441.1	1	0	0	0	1	NA
AC006441.3	1	0	0	0	1	NA
AC006441.4	0.374633	-0.00177402	0.001	0.001	1	NA
AC006445.3	0.00925314	0.00181749	0.003	0.001	1	NA
AC006449.2	0.000341361	-0.00662225	0.002	0.008	1	NA
AC006449.3	0.453363	0.000569132	0.002	0.002	1	NA
AC006449.5	0.347874	0.00019304	0	0	1	NA
AC006449.6	0.000473477	-0.0125853	0.007	0.014	1	NA
AC006452.1	0.577697	-0.00141534	0.004	0.005	1	NA
AC006458.1	1	0	0	0	1	NA
AC006460.1	0.0329987	-0.00348213	0.003	0.006	1	NA
AC006460.2	0.0498541	-0.0347364	0.051	0.06	1	NA
AC006478.2	1	0	0	0	1	NA
AC006480.2	0.882312	-0.025912	0.119	0.114	1	NA
AC006483.2	1	0	0	0	1	NA
AC006487.1	0.000838074	0.00458	0.005	0.001	1	NA
AC006487.2	1	0	0	0	1	NA
AC006504.1	0.000239939	0.00834883	0.014	0.006	1	NA
AC006504.2	0.085254	-0.00238064	0.001	0.002	1	NA
AC006504.5	4.00223e-08	0.0103176	0.091	0.056	0.00126591	NA
AC006504.7	0.423776	-0.000677644	0.003	0.002	1	NA
AC006511.4	0.285394	0.000371112	0.002	0.001	1	NA
AC006511.6	0.0102883	0.00284699	0.005	0.002	1	NA
AC006517.2	0.259332	-0.000881984	0	0.001	1	NA
AC006525.1	0.0166627	0.00153864	0.011	0.006	1	NA
AC006538.1	0.193126	0.000783243	0.002	0.001	1	NA
AC006538.3	8.35013e-08	0.00741968	0.01	0.001	0.00264114	NA
AC006538.4	0.000473101	0.00256694	0.005	0.001	1	NA
AC006547.1	2.08426e-05	-0.028372	0.037	0.055	0.659251	NA
AC006547.2	0.000599703	0.0032102	0.004	0.001	1	NA
AC006547.3	5.76689e-09	-0.0121292	0.003	0.015	0.000182407	NA
AC006557.1	1	0	0	0	1	NA
AC006557.3	1	0	0	0	1	NA
AC006566.1	0.00696787	0.00128466	0.013	0.007	1	NA
AC006566.2	0.381235	0.000119951	0.001	0	1	NA
AC006581.1	0.00790708	-0.00521039	0.004	0.009	1	NA
AC006581.2	3.41266e-05	0.0100832	0.069	0.046	1	NA
AC006942.1	0.0764723	-0.00372217	0.002	0.004	1	NA
AC006946.2	0.000124942	0.00277742	0.006	0.001	1	NA
AC006946.3	0.012951	0.000952053	0.002	0	1	NA
AC006960.2	0.012038	0.0040579	0.002	0	1	NA
AC006960.3	1	0	0	0	1	NA
AC006970.3	0.28699	-0.000377377	0	0	1	NA
AC006972.1	0.964797	-0.0129774	0.012	0.012	1	NA
AC006974.1	0.211219	0.000803321	0.003	0.001	1	NA
AC006974.2	0.000703983	0.00503742	0.004	0	1	NA
AC006994.2	2.56609e-10	0.0184587	0.105	0.063	8.11654e-06	NA
AC007001.1	0.138716	0.000710723	0.002	0.001	1	NA
AC007009.1	1.92195e-16	-0.0270558	0.005	0.028	6.07913e-12	NA
AC007014.1	1.20693e-14	-0.0239344	0.007	0.029	3.81753e-10	NA
AC007014.2	0.416638	-0.000247151	0.001	0.001	1	NA
AC007029.1	0.555388	-0.00034311	0	0.001	1	NA
AC007032.1	0.137422	-0.000676232	0	0.001	1	NA
AC007036.1	0.28699	-0.000797551	0	0	1	NA
AC007036.2	0.184241	0.000562404	0	0	1	NA
AC007036.3	0.28699	-0.000178141	0	0	1	NA
AC007036.5	1	0	0	0	1	NA
AC007038.1	0.617673	-0.0287212	0.17	0.155	1	NA
AC007038.2	1.63905e-05	-0.0198373	0.017	0.031	0.518431	NA
AC007040.1	0.899397	-0.00103948	0	0.001	1	NA
AC007064.2	0.138627	0.000690246	0.002	0.001	1	NA
AC007066.2	0.0397984	-0.000192709	0.017	0.012	1	NA
AC007091.1	0.000201539	0.00833059	0.009	0.002	1	NA
AC007098.1	5.99415e-22	-0.0488814	0.015	0.053	1.89595e-17	NA
AC007099.1	0.000281312	0.00595687	0.01	0.003	1	NA
AC007100.1	8.92744e-82	0.181389	0.22	0.064	2.82375e-77	NA
AC007100.2	0.211265	0.000902172	0.003	0.001	1	NA
AC007106.1	0.00587085	0.00200579	0.003	0.001	1	NA
AC007106.2	0.657308	-0.00225138	0.007	0.007	1	NA
AC007114.1	0.473878	0.00102194	0.026	0.023	1	NA
AC007114.2	1.66896e-86	-0.130215	0.024	0.141	5.27891e-82	NA
AC007126.1	2.43191e-89	0.136017	0.303	0.108	7.69213e-85	NA
AC007128.2	0.926683	-0.0057725	0.013	0.013	1	NA
AC007130.1	1.67542e-26	-0.0360199	0.005	0.039	5.29934e-22	NA
AC007132.1	0.181962	0.00156042	0.004	0.003	1	NA
AC007163.1	0.00234681	0.00430621	0.004	0.001	1	NA
AC007179.1	0.201248	-0.0170566	0.009	0.011	1	NA
AC007179.2	0.0603584	0.000722879	0.001	0	1	NA
AC007182.1	1	0	0	0	1	NA
AC007192.2	0.0505366	-0.00232212	0.001	0.002	1	NA
AC007193.1	2.43953e-07	-0.00901203	0.001	0.009	0.00771622	NA
AC007193.2	0.6326	-0.00267006	0.054	0.051	1	NA
AC007193.3	1	0	0	0	1	NA
AC007216.1	0.28699	-0.000552831	0	0	1	NA
AC007216.2	0.221583	-0.00128031	0.004	0.005	1	NA
AC007216.3	0.0193496	-0.0114738	0.011	0.017	1	NA
AC007216.4	2.52721e-18	0.0509534	0.243	0.155	7.99356e-14	NA
AC007218.1	0.347874	0.000265562	0	0	1	NA
AC007218.2	0.424177	-0.00175757	0.001	0.002	1	NA
AC007218.3	0.0194864	0.000484569	0.002	0	1	NA
AC007220.1	2.22585e-15	0.021499	0.029	0.005	7.04035e-11	NA
AC007220.2	0.223741	-0.00336352	0.004	0.006	1	NA
AC007221.1	0.0385201	0.0027395	0.021	0.015	1	NA
AC007222.2	0.184241	0.00061342	0	0	1	NA
AC007240.3	0.00586638	0.00177636	0.003	0.001	1	NA
AC007255.1	9.12685e-05	0.0070103	0.023	0.012	1	NA
AC007262.2	1.41795e-64	0.164996	0.399	0.207	4.48497e-60	NA
AC007271.1	0.0214136	0.0025647	0.001	0	1	NA
AC007272.1	0.0840277	0.00154916	0.001	0	1	NA
AC007277.1	0.000110543	0.00652592	0.007	0.001	1	NA
AC007278.1	1	0	0	0	1	NA
AC007278.2	1	0	0	0	1	NA
AC007279.2	0.0029777	-0.0112907	0.009	0.017	1	NA
AC007285.1	0.17816	0.000942986	0.011	0.008	1	NA
AC007285.2	0.00249708	-0.00353196	0.001	0.005	1	NA
AC007292.1	0.245743	-0.000334959	0.002	0.001	1	NA
AC007292.2	0.18253	-0.000328589	0.003	0.002	1	NA
AC007292.3	0.00117452	0.00562588	0.009	0.003	1	NA
AC007298.1	0.507164	0.00017094	0.001	0.001	1	NA
AC007298.2	0.168421	-0.00160136	0.001	0.002	1	NA
AC007314.1	0.130277	-0.0050212	0.004	0.006	1	NA
AC007317.1	0.00790538	-0.0192004	0.034	0.045	1	NA
AC007317.2	0.00912918	0.00225187	0.023	0.015	1	NA
AC007319.1	1.02401e-09	-0.00349131	0.2	0.137	3.23894e-05	NA
AC007325.1	1	0	0	0	1	NA
AC007325.2	0.00526539	0.00346938	0.011	0.005	1	NA
AC007325.4	0.939273	-0.0074087	0.029	0.029	1	NA
AC007326.2	1	0	0	0	1	NA
AC007326.5	0.614607	-0.000476101	0.002	0.002	1	NA
AC007327.2	0.0331497	-0.00173057	0	0.001	1	NA
AC007333.1	0.928987	-8.2922e-05	0	0	1	NA
AC007333.2	0.0855566	0.00252339	0.002	0.001	1	NA
AC007336.1	0.876975	-0.000175692	0.001	0.001	1	NA
AC007336.2	1	0	0	0	1	NA
AC007342.1	0.804578	-0.000133432	0.002	0.002	1	NA
AC007342.4	0.758549	0.000378981	0.001	0.001	1	NA
AC007342.5	0.347874	0.000714455	0	0	1	NA
AC007344.1	0.0117953	0.00449576	0.01	0.005	1	NA
AC007347.1	2.62816e-05	-0.0138422	0.007	0.017	0.831286	NA
AC007349.1	0.639084	0.000193259	0	0	1	NA
AC007349.2	1	0	0	0	1	NA
AC007350.1	1	0	0	0	1	NA
AC007362.1	1	0	0	0	1	NA
AC007364.1	4.05078e-14	0.0343634	0.09	0.046	1.28126e-09	NA
AC007365.1	0.0915763	-0.00246112	0.001	0.003	1	NA
AC007368.1	0.0269924	0.00607761	0.011	0.006	1	NA
AC007370.1	0.0212877	0.00297941	0.013	0.007	1	NA
AC007370.2	1.37588e-30	0.0386228	0.091	0.028	4.35192e-26	NA
AC007376.2	0.374847	-0.00695797	0.006	0.008	1	NA
AC007378.1	0.585511	-0.000109852	0.001	0.001	1	NA
AC007381.1	4.64126e-18	0.102387	0.724	0.57	1.46803e-13	NA
AC007381.2	1.07578e-05	-0.00618916	0.001	0.008	0.340271	NA
AC007383.2	0.0106591	-0.00504649	0.007	0.012	1	NA
AC007383.3	0.0127766	-0.00410374	0.003	0.007	1	NA
AC007384.1	7.70589e-35	-0.0759388	0.03	0.094	2.43737e-30	NA
AC007387.2	0.0603584	0.000913308	0.001	0	1	NA
AC007387.3	0.00788683	0.00270237	0.002	0	1	NA
AC007389.1	4.77647e-16	0.0438343	0.085	0.04	1.5108e-11	NA
AC007389.3	0.0240743	0.00293106	0.006	0.002	1	NA
AC007389.5	1	0	0	0	1	NA
AC007390.2	2.31157e-10	0.0105382	0.04	0.016	7.31151e-06	NA
AC007391.1	0.28699	-0.000173697	0	0	1	NA
AC007391.2	1	0	0	0	1	NA
AC007391.3	3.85026e-06	-0.0748597	0.132	0.159	0.121784	NA
AC007402.1	1.10737e-16	0.0496029	0.063	0.024	3.50261e-12	NA
AC007405.1	5.29831e-13	0.0223979	0.04	0.013	1.67586e-08	NA
AC007405.3	0.0594126	-0.00670659	0.005	0.008	1	NA
AC007406.2	0.0241094	0.00232116	0.003	0.001	1	NA
AC007406.3	0.00843286	-0.00457058	0.001	0.004	1	NA
AC007406.4	1	0	0	0	1	NA
AC007406.5	5.99299e-06	-0.00194353	0.075	0.048	0.189558	NA
AC007422.1	0.000310882	0.00507809	0.015	0.006	1	NA
AC007431.1	0.451076	-0.00111848	0.002	0.002	1	NA
AC007431.2	0.184241	0.000710699	0	0	1	NA
AC007432.1	0.0145504	0.00319942	0.003	0.001	1	NA
AC007448.4	0.826923	-0.000254837	0.001	0.002	1	NA
AC007448.5	3.65755e-15	0.0215752	0.034	0.008	1.15688e-10	NA
AC007450.1	0.228663	0.000738812	0.001	0	1	NA
AC007463.1	0.184241	0.000984715	0	0	1	NA
AC007463.2	0.347874	0.00077972	0	0	1	NA
AC007491.1	0.0888534	0.000817383	0.002	0.001	1	NA
AC007493.1	0.0721589	0.00454924	0.004	0.002	1	NA
AC007494.2	9.76145e-05	-0.00599397	0.002	0.008	1	NA
AC007495.1	0.749303	0.00125578	0.004	0.004	1	NA
AC007496.1	0.0732058	-0.00147208	0	0.001	1	NA
AC007496.2	0.0503502	-0.00172219	0.001	0.002	1	NA
AC007497.1	0.639084	3.18822e-05	0	0	1	NA
AC007513.1	0.0149191	-0.000267908	0.015	0.009	1	NA
AC007527.1	0.555537	-0.00102613	0	0.001	1	NA
AC007529.1	1	0	0	0	1	NA
AC007529.2	0.146787	-0.00113137	0.005	0.007	1	NA
AC007533.1	2.09462e-13	-0.0286954	0.011	0.034	6.62528e-09	NA
AC007535.1	0.0856321	0.00217642	0.002	0.001	1	NA
AC007540.1	0.132054	-0.000599649	0	0.001	1	NA
AC007541.1	9.46859e-09	-0.017722	0.009	0.025	0.000299491	NA
AC007546.1	0.117249	0.000709406	0.003	0.001	1	NA
AC007557.1	0.012951	0.00108169	0.002	0	1	NA
AC007557.3	0.3811	0.00025788	0.001	0	1	NA
AC007557.4	0.184241	0.00113595	0	0	1	NA
AC007563.1	0.00788683	0.00140059	0.002	0	1	NA
AC007563.2	2.56417e-98	0.252573	0.467	0.225	8.11048e-94	NA
AC007563.4	0.218484	-0.000323373	0.006	0.004	1	NA
AC007566.1	7.01415e-07	0.00817648	0.35	0.267	0.0221858	NA
AC007569.1	8.21323e-05	-0.00530628	0.002	0.007	1	NA
AC007570.1	0.832415	-0.000261647	0.001	0.001	1	NA
AC007595.1	0.103864	0.000437094	0.001	0	1	NA
AC007598.1	1	0	0	0	1	NA
AC007598.2	0.555388	-0.000449736	0	0.001	1	NA
AC007599.2	0.0110643	-0.00397997	0.004	0.008	1	NA
AC007601.1	0.332012	0.00135518	0.001	0.001	1	NA
AC007601.2	1	0	0	0	1	NA
AC007603.1	1	0	0	0	1	NA
AC007608.1	0.0887352	0.00142018	0.002	0.001	1	NA
AC007608.3	0.000704139	0.00349426	0.003	0	1	NA
AC007610.1	0.0187934	0.00240364	0.005	0.002	1	NA
AC007610.2	0.2534	0.00402814	0.006	0.004	1	NA
AC007610.5	0.115099	0.00030969	0.004	0.002	1	NA
AC007611.1	0.374869	-0.00318613	0.02	0.018	1	NA
AC007613.1	0.977566	-0.000634463	0.004	0.004	1	NA
AC007614.1	0.583895	-3.27335e-05	0.004	0.003	1	NA
AC007619.1	0.513331	-0.00505266	0.015	0.017	1	NA
AC007620.2	0.000452741	0.00359757	0.026	0.015	1	NA
AC007620.3	0.0461399	0.000430284	0.004	0.002	1	NA
AC007622.2	2.07821e-05	-0.0109579	0.005	0.014	0.657337	NA
AC007637.1	0.0498789	-0.0182746	0.041	0.05	1	NA
AC007638.1	1	0	0	0	1	NA
AC007638.2	0.540943	-0.000424586	0.003	0.002	1	NA
AC007649.1	0.184241	0.00115128	0	0	1	NA
AC007652.1	0.0357278	0.00155901	0.001	0	1	NA
AC007652.2	0.678303	0.000627836	0.003	0.002	1	NA
AC007652.3	0.178469	-0.048078	0.128	0.131	1	NA
AC007655.1	0.184241	0.000186157	0	0	1	NA
AC007655.2	5.54477e-07	0.010306	0.022	0.008	0.0175381	NA
AC007656.2	0.00236151	0.00462221	0.004	0.001	1	NA
AC007663.2	0.347874	0.000240317	0	0	1	NA
AC007663.3	0.233249	-0.000757696	0.001	0.002	1	NA
AC007663.4	0.110286	-0.00104684	0	0.002	1	NA
AC007666.1	2.49493e-06	0.00578549	0.011	0.002	0.0789147	NA
AC007666.2	0.11192	-0.00883128	0.021	0.026	1	NA
AC007671.1	1	0	0	0	1	NA
AC007679.1	0.964731	0.000770477	0.002	0.002	1	NA
AC007681.1	0.00759236	0.00587232	0.031	0.021	1	NA
AC007682.1	0.28699	-0.000387846	0	0	1	NA
AC007684.2	0.974658	-0.00586144	0.016	0.015	1	NA
AC007686.2	0.153698	0.000451265	0.006	0.003	1	NA
AC007686.3	0.132907	0.00191794	0.006	0.004	1	NA
AC007686.4	0.827379	0.00087673	0.014	0.013	1	NA
AC007687.1	0.28699	-0.000618967	0	0	1	NA
AC007688.3	0.103864	0.000757785	0.001	0	1	NA
AC007695.1	2.12378e-19	-0.0239448	0.004	0.03	6.71752e-15	NA
AC007728.1	0.00375786	-0.00585615	0.003	0.008	1	NA
AC007728.2	0.138495	0.000983587	0.002	0.001	1	NA
AC007728.3	1	0	0	0	1	NA
AC007731.3	0.330517	-0.0005425	0	0.001	1	NA
AC007736.1	3.25672e-05	-0.00522466	0.001	0.007	1	NA
AC007743.1	7.07334e-05	-0.00816185	0.002	0.008	1	NA
AC007749.1	0.000730273	0.00426281	0.005	0.001	1	NA
AC007749.2	0.029546	-0.00196764	0.001	0.003	1	NA
AC007750.1	0.928987	-4.9164e-05	0	0	1	NA
AC007773.1	0.0332633	0.00259478	0.017	0.011	1	NA
AC007780.1	6.29248e-13	-0.072399	0.094	0.14	1.99031e-08	NA
AC007785.1	0.000604424	0.00598856	0.009	0.003	1	NA
AC007785.3	0.0188886	0.00227244	0.005	0.002	1	NA
AC007786.1	0.364667	0.000446421	0.004	0.003	1	NA
AC007786.4	0.0029696	0.00342051	0.002	0	1	NA
AC007787.1	1	0	0	0	1	NA
AC007823.1	0.0157869	0.00198309	0.007	0.003	1	NA
AC007834.1	0.28575	-0.00043547	0.002	0.001	1	NA
AC007846.1	0.000130092	0.0122863	0.01	0.003	1	NA
AC007848.1	0.425764	-0.000974161	0.001	0.002	1	NA
AC007849.1	1	0	0	0	1	NA
AC007861.1	0.0650792	-0.00153874	0	0.001	1	NA
AC007877.1	0.892119	-0.00549164	0.009	0.009	1	NA
AC007878.1	1.53397e-07	0.00695367	0.078	0.047	0.00485194	NA
AC007879.2	1	0	0	0	1	NA
AC007879.3	0.000121298	0.00715861	0.007	0.002	1	NA
AC007879.4	0.184241	0.000632021	0	0	1	NA
AC007879.5	1	0	0	0	1	NA
AC007880.1	0.759227	-0.000480737	0.001	0.001	1	NA
AC007881.2	0.00712464	0.0032504	0.005	0.001	1	NA
AC007881.3	3.64806e-05	-0.0050315	0.001	0.006	1	NA
AC007881.4	0.000172943	-0.0144565	0.01	0.019	1	NA
AC007906.1	0.00795065	0.00137694	0.007	0.003	1	NA
AC007906.2	0.00185176	-0.00566238	0	0.003	1	NA
AC007907.1	0.0172243	-0.00102999	0	0.001	1	NA
AC007920.1	1	0	0	0	1	NA
AC007920.2	0.000779254	-0.0191048	0.031	0.045	1	NA
AC007922.1	0.347874	8.96681e-05	0	0	1	NA
AC007922.2	0.507294	-0.00050431	0.001	0.001	1	NA
AC007922.3	0.0029696	0.00316478	0.002	0	1	NA
AC007922.4	0.0603584	0.00170602	0.001	0	1	NA
AC007923.4	4.63078e-19	0.0307754	0.069	0.025	1.46471e-14	NA
AC007938.2	0.507034	0.000218829	0.001	0.001	1	NA
AC007938.3	0.132054	-0.000635009	0	0.001	1	NA
AC007948.1	1	0	0	0	1	NA
AC007950.1	0.184241	0.000937553	0	0	1	NA
AC007950.2	0.960909	-0.000375793	0.002	0.002	1	NA
AC007952.2	0.0603584	0.00121413	0.001	0	1	NA
AC007952.3	0.555836	-0.0006987	0	0.001	1	NA
AC007952.4	6.01163e-73	0.108108	0.225	0.071	1.90148e-68	NA
AC007952.5	0.184241	0.00133789	0	0	1	NA
AC007952.6	0.899397	-0.000281771	0	0.001	1	NA
AC007952.7	0.638673	0.000798226	0	0	1	NA
AC007952.8	0.28699	-0.000418728	0	0	1	NA
AC007952.9	1	0	0	0	1	NA
AC007953.2	1	0	0	0	1	NA
AC007991.3	1.97118e-05	0.0095218	0.012	0.004	0.623485	NA
AC007993.2	0.929267	0.000117005	0	0	1	NA
AC007993.3	0.381235	-7.9098e-05	0.001	0	1	NA
AC007996.1	0.517838	-0.00177795	0.012	0.01	1	NA
AC007998.3	0.928987	-0.000193925	0	0	1	NA
AC007998.4	0.928987	-0.000256637	0	0	1	NA
AC008011.2	0.259437	-0.000427684	0	0.001	1	NA
AC008014.1	1.48915e-80	0.256389	0.729	0.492	4.71017e-76	NA
AC008026.3	1.57112e-20	0.0289411	0.04	0.008	4.96945e-16	NA
AC008033.3	0.00476405	0.00142175	0.005	0.001	1	NA
AC008035.1	0.611819	-0.00131322	0.001	0.002	1	NA
AC008040.1	0.538657	0.00114881	0.003	0.002	1	NA
AC008050.1	0.012186	0.0056501	0.027	0.019	1	NA
AC008056.1	0.205728	0.000443502	0.005	0.003	1	NA
AC008056.2	0.638878	0.000470128	0	0	1	NA
AC008056.3	0.0603584	0.00135163	0.001	0	1	NA
AC008060.1	0.103864	0.000575572	0.001	0	1	NA
AC008060.3	0.138303	0.00189955	0.001	0	1	NA
AC008060.5	0.347874	0.000540978	0	0	1	NA
AC008063.1	0.899397	-0.000483033	0	0.001	1	NA
AC008067.1	0.0160733	0.00279854	0.004	0.001	1	NA
AC008073.1	0.103864	0.000871174	0.001	0	1	NA
AC008073.2	0.0513974	0.00199069	0.002	0	1	NA
AC008074.2	0.638673	0.000347952	0	0	1	NA
AC008079.1	4.58228e-25	-0.0664702	0.034	0.088	1.44938e-20	NA
AC008080.1	0.132054	-0.00154008	0	0.001	1	NA
AC008080.3	0.925107	0.00120328	0.001	0.001	1	NA
AC008080.4	0.506513	0.000767041	0.001	0.001	1	NA
AC008083.2	0.0058463	0.00371856	0.003	0.001	1	NA
AC008083.3	0.832268	0.00016377	0.001	0.001	1	NA
AC008083.4	1	0	0	0	1	NA
AC008088.1	0.228835	0.000355759	0.001	0	1	NA
AC008105.1	0.0241563	0.0027378	0.003	0.001	1	NA
AC008105.3	2.99087e-06	0.0107034	0.021	0.008	0.0946012	NA
AC008114.1	0.0385204	-0.00301586	0.002	0.005	1	NA
AC008115.1	0.877777	0.000219884	0.001	0.001	1	NA
AC008115.2	0.170058	0.00162768	0.002	0.001	1	NA
AC008115.3	0.00114058	-0.00584202	0.004	0.01	1	NA
AC008119.1	6.5075e-16	-0.0294771	0.006	0.03	2.05832e-11	NA
AC008121.2	0.00429256	0.00159873	0.004	0.001	1	NA
AC008121.3	0.0540675	0.000517736	0.003	0.001	1	NA
AC008124.1	0.41929	-0.0295178	0.169	0.151	1	NA
AC008125.1	1	0	0	0	1	NA
AC008127.1	0.822184	-0.00405592	0.005	0.005	1	NA
AC008133.1	0.347874	0.00012348	0	0	1	NA
AC008147.1	0.664418	1.43582e-05	0.001	0.001	1	NA
AC008147.2	6.25708e-06	0.00511755	0.014	0.005	0.197912	NA
AC008149.1	1	0	0	0	1	NA
AC008149.2	0.0242662	0.000832675	0.003	0.001	1	NA
AC008154.1	1	0	0	0	1	NA
AC008164.1	0.638878	0.000588181	0	0	1	NA
AC008170.1	0.00370801	0.0034478	0.004	0.001	1	NA
AC008180.2	1	0	0	0	1	NA
AC008250.1	4.14399e-103	-0.199187	0.054	0.208	1.31074e-98	NA
AC008250.2	0.0357278	0.000791631	0.001	0	1	NA
AC008264.2	0.138396	-0.00340863	0.004	0.007	1	NA
AC008267.5	0.014523	-0.0119208	0.018	0.025	1	NA
AC008268.1	0.103864	0.000500965	0.001	0	1	NA
AC008269.1	7.48375e-93	0.202275	0.401	0.179	2.36711e-88	NA
AC008269.2	1	0	0	0	1	NA
AC008273.1	1	0	0	0	1	NA
AC008277.1	2.61046e-08	-0.0142438	0.004	0.017	0.000825689	NA
AC008278.1	0.0357278	0.00105109	0.001	0	1	NA
AC008278.2	0.0357278	0.0012837	0.001	0	1	NA
AC008280.3	4.10266e-09	0.0126213	0.019	0.005	0.000129767	NA
AC008391.1	1	0	0	0	1	NA
AC008393.1	0.313523	-0.00432068	0.014	0.017	1	NA
AC008395.1	0.332669	-3.08625e-05	0.001	0.001	1	NA
AC008397.1	0.103864	0.0014713	0.001	0	1	NA
AC008403.2	0.0603584	0.00195897	0.001	0	1	NA
AC008403.3	0.00733142	0.00493233	0.011	0.006	1	NA
AC008406.1	0.929267	0.000199922	0	0	1	NA
AC008415.1	0.000543407	0.0105553	0.022	0.012	1	NA
AC008429.1	0.14911	0.00182528	0.003	0.001	1	NA
AC008429.3	0.0359629	0.00279687	0.002	0.001	1	NA
AC008434.1	2.10533e-11	0.0181068	0.018	0.003	6.65915e-07	NA
AC008438.1	7.35811e-14	0.0266508	0.073	0.034	2.32737e-09	NA
AC008438.2	0.056555	0.00132514	0.002	0.001	1	NA
AC008440.1	2.381e-10	0.0161093	0.02	0.004	7.53111e-06	NA
AC008440.2	0.192489	-0.0016259	0	0.001	1	NA
AC008443.1	0.0561231	-0.0149167	0.166	0.142	1	NA
AC008443.3	0.104735	0.00107893	0.003	0.001	1	NA
AC008443.4	1.68795e-08	-0.0132781	0.007	0.021	0.000533899	NA
AC008443.5	0.244335	-0.00647638	0.011	0.014	1	NA
AC008443.6	0.000737335	0.00296593	0.005	0.001	1	NA
AC008443.8	0.0279767	-0.00042382	0.012	0.007	1	NA
AC008443.9	0.88423	0.000547144	0.001	0.001	1	NA
AC008453.1	0.347874	0.000685314	0	0	1	NA
AC008453.2	0.0305693	0.00279016	0.012	0.007	1	NA
AC008456.1	0.347874	0.000471198	0	0	1	NA
AC008459.1	0.28699	-0.000214227	0	0	1	NA
AC008462.1	7.3292e-13	0.0231016	0.113	0.064	2.31823e-08	NA
AC008464.1	2.21413e-05	-0.021237	0.017	0.031	0.700331	NA
AC008467.1	7.67465e-45	0.0546799	0.08	0.012	2.42749e-40	NA
AC008474.1	4.27303e-13	0.0271152	0.118	0.068	1.35156e-08	NA
AC008494.3	0.132054	-0.000340892	0	0.001	1	NA
AC008496.2	5.37119e-24	-0.12633	0.14	0.21	1.69891e-19	NA
AC008496.3	0.132054	-0.00103382	0	0.001	1	NA
AC008507.2	0.0172243	-0.00117869	0	0.001	1	NA
AC008507.4	0.000610173	0.00361068	0.009	0.003	1	NA
AC008507.5	0.0214136	0.00197212	0.001	0	1	NA
AC008514.1	0.0342634	-0.00379082	0.021	0.015	1	NA
AC008517.1	0.184241	0.00021961	0	0	1	NA
AC008522.1	0.233706	-0.000718236	0.001	0.002	1	NA
AC008532.1	0.759058	7.32054e-05	0.001	0.001	1	NA
AC008534.1	0.877456	-2.82429e-05	0.001	0.001	1	NA
AC008537.2	0.382613	0.00017295	0.003	0.002	1	NA
AC008537.4	0.91044	0.0011563	0.005	0.005	1	NA
AC008543.1	1.66721e-05	0.00931704	0.022	0.01	0.527337	NA
AC008543.3	0.184241	0.000247944	0	0	1	NA
AC008543.4	1	0	0	0	1	NA
AC008543.5	0.0841967	0.000751063	0.001	0	1	NA
AC008549.2	0.000193877	0.00414433	0.006	0.001	1	NA
AC008551.1	5.35857e-10	0.0146727	0.038	0.015	1.69491e-05	NA
AC008554.1	7.87617e-06	-0.0133837	0.011	0.024	0.249123	NA
AC008555.1	0.899397	-0.000464527	0	0.001	1	NA
AC008555.2	0.226773	0.000637871	0.009	0.007	1	NA
AC008555.4	0.638744	-0.00497493	0.006	0.007	1	NA
AC008555.5	0.211128	0.000352992	0.003	0.001	1	NA
AC008556.1	1	0	0	0	1	NA
AC008567.2	0.103864	0.000475142	0.001	0	1	NA
AC008567.3	0.184241	0.00033288	0	0	1	NA
AC008568.1	0.00431544	0.00632829	0.008	0.003	1	NA
AC008569.1	1.20984e-05	-0.00577109	0.004	0.013	0.382674	NA
AC008569.2	0.153981	-0.00340391	0.006	0.008	1	NA
AC008571.2	7.08679e-251	0.530136	0.707	0.334	2.24155e-246	NA
AC008572.1	0.0360138	0.00255518	0.002	0.001	1	NA
AC008574.1	0.0374736	0.0032717	0.005	0.002	1	NA
AC008581.1	0.228921	-8.1638e-06	0.001	0	1	NA
AC008588.1	0.103864	0.000492044	0.001	0	1	NA
AC008591.1	0.0646168	-0.0022029	0.017	0.012	1	NA
AC008592.1	0.0856825	0.00203956	0.002	0.001	1	NA
AC008592.2	4.29862e-05	-0.0141729	0.007	0.017	1	NA
AC008592.4	0.719473	-0.000326081	0.002	0.001	1	NA
AC008608.2	9.88618e-10	-0.0159253	0.003	0.016	3.127e-05	NA
AC008609.1	0.00922885	0.0022627	0.003	0.001	1	NA
AC008610.1	0.224397	0.00177675	0.013	0.01	1	NA
AC008619.1	0.0237028	0.00435976	0.044	0.034	1	NA
AC008622.2	0.132054	-0.00124685	0	0.001	1	NA
AC008625.1	0.330315	-0.000730324	0	0.001	1	NA
AC008627.1	1	0	0	0	1	NA
AC008629.1	3.58346e-85	0.151604	0.315	0.122	1.13345e-80	NA
AC008632.1	0.332294	0.000465852	0.001	0.001	1	NA
AC008649.1	0.347874	0.000177312	0	0	1	NA
AC008649.2	0.0934183	-0.00140076	0.035	0.028	1	NA
AC008655.1	0.59649	-0.000502818	0.001	0.001	1	NA
AC008655.2	0.638673	0.000641065	0	0	1	NA
AC008659.1	0.0370278	0.0015054	0.003	0.001	1	NA
AC008662.1	0.00369277	0.00092632	0.009	0.004	1	NA
AC008663.1	0.638673	0.000266733	0	0	1	NA
AC008663.2	0.374728	-0.000896298	0.001	0.001	1	NA
AC008667.1	5.25061e-13	0.0203799	0.031	0.008	1.66077e-08	NA
AC008667.2	0.0393067	-0.00177429	0	0.002	1	NA
AC008667.3	0.929267	0.000139222	0	0	1	NA
AC008674.1	0.0120483	0.00174937	0.002	0	1	NA
AC008676.1	0.473946	-0.00208853	0.003	0.004	1	NA
AC008679.1	2.59498e-16	0.0252625	0.067	0.027	8.20794e-12	NA
AC008680.1	1	0	0	0	1	NA
AC008686.1	0.00258264	-0.00178716	0	0.002	1	NA
AC008687.4	1	0	0	0	1	NA
AC008691.1	4.35792e-32	0.0662836	0.11	0.038	1.37841e-27	NA
AC008696.2	1.62976e-22	-0.118305	0.104	0.17	5.15492e-18	NA
AC008700.1	0.000404581	-0.0132915	0.008	0.016	1	NA
AC008703.1	0.245684	0.00172335	0.004	0.002	1	NA
AC008705.2	0.461997	-0.00173075	0.002	0.003	1	NA
AC008708.2	0.0603584	0.00164305	0.001	0	1	NA
AC008728.1	0.0360011	0.002527	0.002	0.001	1	NA
AC008731.1	1.12126e-110	-0.161289	0.025	0.167	3.54655e-106	NA
AC008734.1	0.103864	0.00033362	0.001	0	1	NA
AC008735.1	0.00128692	0.0038285	0.005	0.001	1	NA
AC008735.2	7.28797e-26	-0.0486312	0.012	0.053	2.30518e-21	NA
AC008735.4	0.747877	-0.00028686	0.003	0.003	1	NA
AC008736.1	0.480808	-0.00450336	0.009	0.011	1	NA
AC008737.1	0.00788683	0.00114693	0.002	0	1	NA
AC008738.1	0.664762	-5.09697e-05	0.001	0.001	1	NA
AC008738.2	0.877617	0.000351983	0.001	0.001	1	NA
AC008738.3	1	0	0	0	1	NA
AC008738.4	1	0	0	0	1	NA
AC008738.6	0.28699	-0.000626897	0	0	1	NA
AC008739.1	0.138412	0.00108245	0.001	0	1	NA
AC008742.1	0.0650792	-0.00178149	0	0.001	1	NA
AC008747.1	0.960248	0.000132907	0.002	0.002	1	NA
AC008750.2	1	0	0	0	1	NA
AC008750.3	1	0	0	0	1	NA
AC008750.4	0.984418	-0.000809864	0.002	0.002	1	NA
AC008750.5	1.17175e-05	0.00808802	0.01	0.002	0.370625	NA
AC008750.7	0.228749	0.000972772	0.001	0	1	NA
AC008751.3	9.44944e-05	0.00575357	0.01	0.003	1	NA
AC008752.1	0.639731	-0.000641707	0.002	0.002	1	NA
AC008752.2	1	0	0	0	1	NA
AC008758.2	0.367052	-0.00247879	0.003	0.004	1	NA
AC008759.2	1	0	0	0	1	NA
AC008759.3	1	0	0	0	1	NA
AC008760.1	0.555836	-0.000122276	0	0.001	1	NA
AC008760.2	0.00183277	0.00289659	0.003	0	1	NA
AC008761.1	4.15886e-05	-0.00755664	0.003	0.01	1	NA
AC008763.1	0.404552	-0.000690623	0.001	0.002	1	NA
AC008764.2	0.307273	-0.00403325	0.006	0.008	1	NA
AC008764.3	0.184241	0.00026334	0	0	1	NA
AC008764.6	0.767601	-0.00215217	0.006	0.006	1	NA
AC008764.7	0.598796	-0.00133034	0.007	0.006	1	NA
AC008764.8	0.406336	-0.00385021	0.01	0.012	1	NA
AC008766.1	0.28699	-0.000549537	0	0	1	NA
AC008770.3	0.67594	-0.0016566	0.008	0.007	1	NA
AC008771.1	1.89099e-72	-0.185522	0.098	0.236	5.9812e-68	NA
AC008780.1	0.0341848	0.00356254	0.004	0.001	1	NA
AC008780.2	0.301358	-0.00205392	0.011	0.013	1	NA
AC008781.1	0.278922	0.000333025	0.01	0.008	1	NA
AC008781.2	0.000620518	-0.00828979	0.005	0.011	1	NA
AC008781.3	0.873714	-0.00326417	0.016	0.015	1	NA
AC008786.1	0.0513974	0.00341541	0.002	0	1	NA
AC008798.2	0.0514817	0.000854237	0.002	0	1	NA
AC008798.3	0.347874	0.000301108	0	0	1	NA
AC008805.2	0.103864	0.00141017	0.001	0	1	NA
AC008825.1	8.76945e-31	0.0945904	0.065	0.014	2.77378e-26	NA
AC008840.1	0.185612	0.00302611	0.012	0.009	1	NA
AC008852.1	1	0	0	0	1	NA
AC008869.1	1	0	0	0	1	NA
AC008870.2	9.37266e-08	0.0112247	0.029	0.012	0.00296457	NA
AC008870.4	0.691177	-0.00164947	0.008	0.007	1	NA
AC008871.1	0.000236161	-0.00717341	0.004	0.012	1	NA
AC008875.1	0.184241	0.000488845	0	0	1	NA
AC008875.2	1	0	0	0	1	NA
AC008875.3	0.832268	-0.000179593	0.001	0.001	1	NA
AC008877.1	0.491537	-0.00125357	0	0.001	1	NA
AC008883.1	2.45437e-12	-0.0181013	0.004	0.021	7.76316e-08	NA
AC008883.2	0.00139108	-0.00280581	0	0.002	1	NA
AC008883.3	0.100721	-0.00117327	0.014	0.01	1	NA
AC008892.1	3.6752e-24	-0.0413806	0.019	0.064	1.16247e-19	NA
AC008894.2	0.60619	-0.00198996	0.003	0.003	1	NA
AC008897.2	0.0799256	0.00122972	0.003	0.001	1	NA
AC008897.3	0.184241	0.00075326	0	0	1	NA
AC008906.1	0.0144726	-0.00142276	0.017	0.01	1	NA
AC008906.2	0.185949	-0.00248261	0.002	0.004	1	NA
AC008914.1	0.00258264	-0.00161205	0	0.002	1	NA
AC008915.1	0.482279	-0.000174863	0.004	0.003	1	NA
AC008915.2	0.0920989	0.00205606	0.02	0.015	1	NA
AC008937.1	0.0514606	0.00107087	0.002	0	1	NA
AC008937.2	3.74054e-07	-0.0135355	0.005	0.016	0.0118313	NA
AC008937.3	0.924474	-0.00120837	0.003	0.003	1	NA
AC008938.1	0.012038	0.00279243	0.002	0	1	NA
AC008945.1	0.259122	-0.000725829	0	0.001	1	NA
AC008945.2	0.000621796	0.00742846	0.008	0.003	1	NA
AC008946.1	2.26894e-06	0.0122617	0.026	0.011	0.0717664	NA
AC008948.1	1	0	0	0	1	NA
AC008957.1	0.0252588	-0.027383	0.046	0.055	1	NA
AC008957.2	2.90596e-18	-0.081333	0.078	0.132	9.19156e-14	NA
AC008964.1	0.0331497	-0.00230547	0	0.001	1	NA
AC008966.1	1.27127e-13	0.0201723	0.085	0.042	4.02104e-09	NA
AC008966.2	0.259122	-0.000651368	0	0.001	1	NA
AC008966.3	0.556285	-9.30327e-05	0	0.001	1	NA
AC008969.1	7.97123e-12	-0.0660779	0.091	0.133	2.5213e-07	NA
AC008969.2	0.0357278	0.00110275	0.001	0	1	NA
AC008972.1	0.103864	0.000419957	0.001	0	1	NA
AC008972.2	0.984321	-0.000423487	0.002	0.002	1	NA
AC008982.2	0.0055941	0.00372015	0.012	0.006	1	NA
AC008991.1	0.0195066	0.00302718	0.007	0.003	1	NA
AC008992.1	0.347874	0.000429357	0	0	1	NA
AC009005.1	0.0840614	0.00199479	0.001	0	1	NA
AC009019.1	0.0172243	-0.00139921	0	0.001	1	NA
AC009019.2	0.0214136	0.00125616	0.001	0	1	NA
AC009021.1	1	0	0	0	1	NA
AC009021.2	1	0	0	0	1	NA
AC009032.1	0.00171776	0.00140456	0.009	0.003	1	NA
AC009034.1	0.132054	-0.000443012	0	0.001	1	NA
AC009035.1	0.00482894	0.0028252	0.002	0	1	NA
AC009041.1	1	0	0	0	1	NA
AC009041.2	0.00139108	-0.00510364	0	0.002	1	NA
AC009041.4	0.000628907	0.00427899	0.008	0.003	1	NA
AC009053.2	0.764189	0.00108491	0.002	0.002	1	NA
AC009053.3	0.0666195	0.00380698	0.006	0.003	1	NA
AC009054.1	1.0786e-06	0.00643282	0.007	0	0.034116	NA
AC009054.2	0.365675	-0.00244936	0.003	0.004	1	NA
AC009055.1	2.03189e-07	0.0135877	0.013	0.002	0.00642688	NA
AC009055.2	0.138274	0.00288513	0.002	0.001	1	NA
AC009060.1	6.92363e-09	-0.019812	0.015	0.035	0.000218995	NA
AC009061.2	2.53548e-76	0.13965	0.287	0.111	8.01971e-72	NA
AC009063.1	1	0	0	0	1	NA
AC009063.2	0.220394	-0.0191448	0.038	0.042	1	NA
AC009063.3	0.608416	-0.00705498	0.034	0.031	1	NA
AC009065.1	0.012951	0.00170702	0.002	0	1	NA
AC009065.2	0.499528	-8.32415e-05	0.003	0.002	1	NA
AC009065.3	0.28699	-0.000378308	0	0	1	NA
AC009065.4	0.000170461	0.00523212	0.011	0.004	1	NA
AC009065.5	0.00923579	0.00209111	0.003	0.001	1	NA
AC009065.6	1	0	0	0	1	NA
AC009065.7	0.184241	0.000241417	0	0	1	NA
AC009065.8	0.378771	-0.00145066	0.004	0.006	1	NA
AC009081.1	0.0603584	0.00193434	0.001	0	1	NA
AC009081.2	0.000404136	0.00600008	0.01	0.003	1	NA
AC009087.1	0.639084	7.59201e-05	0	0	1	NA
AC009088.1	0.00314955	0.00294362	0.005	0.001	1	NA
AC009088.2	0.103864	0.000416127	0.001	0	1	NA
AC009090.1	0.0105815	0.00289358	0.004	0.001	1	NA
AC009090.2	1	0	0	0	1	NA
AC009090.3	0.0650792	-0.000771013	0	0.001	1	NA
AC009090.6	5.60838e-07	-0.0152561	0.008	0.021	0.0177393	NA
AC009093.1	0.00906993	-0.00258358	0	0.002	1	NA
AC009093.2	6.95994e-25	0.0494235	0.098	0.038	2.20143e-20	NA
AC009093.4	4.43256e-09	-0.0112572	0.002	0.014	0.000140202	NA
AC009093.6	1.95248e-05	0.0103422	0.011	0.003	0.617568	NA
AC009095.1	0.28699	-0.000283124	0	0	1	NA
AC009097.1	0.000108335	-0.00439765	0	0.005	1	NA
AC009097.3	0.103864	0.00133344	0.001	0	1	NA
AC009102.1	0.193126	0.000898132	0.002	0.001	1	NA
AC009102.4	0.0427563	-0.00451271	0.003	0.006	1	NA
AC009107.1	0.000152454	0.00526023	0.005	0.001	1	NA
AC009107.2	0.250611	-0.0163092	0.039	0.044	1	NA
AC009108.3	0.012951	0.00177074	0.002	0	1	NA
AC009113.1	0.678181	-0.00210429	0.014	0.015	1	NA
AC009117.2	6.21453e-05	0.00814795	0.007	0.001	1	NA
AC009118.2	0.14211	-0.00090182	0.001	0.002	1	NA
AC009118.3	0.486995	-0.0166298	0.053	0.056	1	NA
AC009119.1	0.231351	-0.00738251	0.013	0.016	1	NA
AC009120.2	1.89208e-199	0.356596	0.698	0.323	5.98463e-195	NA
AC009120.3	0.839655	-0.0005084	0.002	0.002	1	NA
AC009120.4	0.0138614	-0.00591647	0.005	0.01	1	NA
AC009120.5	5.12073e-10	0.0106471	0.024	0.006	1.61969e-05	NA
AC009121.3	0.899791	-6.04817e-05	0	0.001	1	NA
AC009123.1	0.132054	-0.000971898	0	0.001	1	NA
AC009126.1	1.25409e-26	0.0524842	0.174	0.087	3.96669e-22	NA
AC009127.1	0.28699	-0.000251061	0	0	1	NA
AC009133.1	6.05057e-07	-0.0140935	0.005	0.016	0.0191379	NA
AC009133.2	1	0	0	0	1	NA
AC009133.3	1	0	0	0	1	NA
AC009133.4	1	0	0	0	1	NA
AC009137.1	0.451693	0.00280838	0.011	0.009	1	NA
AC009137.2	1	0	0	0	1	NA
AC009139.1	0.000945395	0.00592413	0.004	0.001	1	NA
AC009139.2	0.0229072	0.00185573	0.003	0.001	1	NA
AC009141.1	0.0143361	-0.00205737	0.001	0.003	1	NA
AC009142.1	3.07821e-05	0.00355522	0.032	0.017	0.973637	NA
AC009145.1	0.0214136	0.00148724	0.001	0	1	NA
AC009145.3	0.840612	-0.00132539	0.001	0.001	1	NA
AC009148.1	2.29053e-05	0.00591125	0.019	0.008	0.724494	NA
AC009152.1	1	0	0	0	1	NA
AC009152.3	0.506252	0.00132782	0.001	0.001	1	NA
AC009152.6	1	0	0	0	1	NA
AC009154.1	0.138539	0.00137753	0.002	0.001	1	NA
AC009154.2	1	0	0	0	1	NA
AC009158.1	0.285608	0.000475464	0.002	0.001	1	NA
AC009159.2	1	0	0	0	1	NA
AC009159.3	0.491537	-0.000866182	0	0.001	1	NA
AC009163.1	0.985135	-0.000984794	0.004	0.004	1	NA
AC009163.4	0.00923232	0.00246413	0.003	0.001	1	NA
AC009163.7	2.86145e-05	-0.0112094	0.009	0.02	0.905076	NA
AC009171.2	1.4119e-13	0.0154456	0.022	0.003	4.46583e-09	NA
AC009185.1	0.359069	-0.000159565	0.004	0.002	1	NA
AC009226.1	1.19861e-21	0.0429866	0.085	0.033	3.7912e-17	NA
AC009227.1	1	0	0	0	1	NA
AC009228.1	7.91362e-05	-0.00848671	0.007	0.016	1	NA
AC009229.1	0.103864	0.00184822	0.001	0	1	NA
AC009229.2	0.825579	-0.00207993	0.001	0.002	1	NA
AC009229.3	0.132054	-0.000920408	0	0.001	1	NA
AC009230.1	0.638878	0.000587898	0	0	1	NA
AC009234.1	0.0357278	0.00216144	0.001	0	1	NA
AC009236.1	0.0603584	0.000918658	0.001	0	1	NA
AC009236.2	0.056711	0.0015927	0.002	0.001	1	NA
AC009237.14	0.0307515	-0.00224276	0.001	0.003	1	NA
AC009237.15	0.119268	0.000491188	0.004	0.002	1	NA
AC009242.1	0.170266	0.0017246	0.002	0.001	1	NA
AC009244.2	0.191327	-0.00096182	0.001	0.002	1	NA
AC009248.2	0.0650792	-0.000831276	0	0.001	1	NA
AC009262.1	0.000272937	0.00561303	0.004	0	1	NA
AC009264.1	4.83094e-109	-0.396913	0.344	0.49	1.52803e-104	NA
AC009268.2	0.103864	0.000692651	0.001	0	1	NA
AC009269.2	2.39917e-05	-0.007658	0.004	0.012	0.758859	NA
AC009269.3	0.0603584	0.00138808	0.001	0	1	NA
AC009269.4	0.0728582	0.00131395	0.003	0.001	1	NA
AC009269.5	9.45663e-05	0.00357272	0.009	0.002	1	NA
AC009271.1	0.792999	0.000957889	0.005	0.005	1	NA
AC009271.2	0.928987	-5.38579e-05	0	0	1	NA
AC009275.1	0.00923232	0.00308575	0.003	0.001	1	NA
AC009276.1	0.595194	0.000448742	0.002	0.002	1	NA
AC009283.1	0.000694482	0.00304851	0.011	0.004	1	NA
AC009292.1	0.491537	-0.000791337	0	0.001	1	NA
AC009292.2	0.0298752	0.00395681	0.006	0.003	1	NA
AC009299.3	0.142908	0.00216775	0.019	0.015	1	NA
AC009301.1	0.347874	0.000221519	0	0	1	NA
AC009303.2	0.039183	-0.0110652	0.018	0.024	1	NA
AC009309.1	8.11378e-08	-0.00746948	0.001	0.01	0.00256639	NA
AC009312.1	0.000838654	0.00386921	0.005	0.001	1	NA
AC009313.1	0.00470069	0.00452171	0.005	0.002	1	NA
AC009315.1	1.23746e-35	0.094799	0.149	0.061	3.91409e-31	NA
AC009318.1	1.46061e-22	0.0584656	0.357	0.232	4.61991e-18	NA
AC009318.2	0.664666	-0.00162623	0.005	0.004	1	NA
AC009318.3	0.428911	-0.00281688	0.008	0.007	1	NA
AC009318.4	0.0316701	0.00215485	0.011	0.006	1	NA
AC009320.1	0.925823	0.000170387	0.001	0.001	1	NA
AC009365.1	1.3258e-06	0.00996378	0.011	0.002	0.041935	NA
AC009365.4	7.01425e-15	-0.0327972	0.013	0.04	2.21861e-10	NA
AC009387.1	0.0120175	0.00412483	0.002	0	1	NA
AC009396.3	1	0	0	0	1	NA
AC009403.1	1.86936e-08	-0.0245337	0.02	0.041	0.000591279	NA
AC009403.2	1.42227e-17	0.0326729	0.043	0.012	4.49863e-13	NA
AC009404.1	0.0569199	0.0016813	0.019	0.013	1	NA
AC009407.1	0.103864	0.000316334	0.001	0	1	NA
AC009410.1	0.0384934	-0.00252631	0.002	0.005	1	NA
AC009411.1	0.0357278	0.000906125	0.001	0	1	NA
AC009411.2	0.0887056	0.00170338	0.002	0.001	1	NA
AC009413.2	6.87884e-06	-0.00589832	0.002	0.01	0.217578	NA
AC009432.2	0.000721038	-0.0042213	0.003	0.008	1	NA
AC009434.1	0.138412	0.000986755	0.001	0	1	NA
AC009435.1	0.00020777	0.0105012	0.015	0.007	1	NA
AC009446.1	0.103864	0.00149548	0.001	0	1	NA
AC009464.1	0.348476	1.0736e-05	0.002	0.001	1	NA
AC009468.1	0.103864	0.00157965	0.001	0	1	NA
AC009478.1	0.640484	-0.00212735	0.009	0.008	1	NA
AC009480.1	0.233249	-0.000746866	0.001	0.002	1	NA
AC009486.1	0.184241	0.00024778	0	0	1	NA
AC009486.2	0.00132835	0.00339228	0.008	0.003	1	NA
AC009494.2	0.347874	0.00045567	0	0	1	NA
AC009495.1	0.581139	-0.00249888	0.009	0.008	1	NA
AC009495.2	1	0	0	0	1	NA
AC009495.3	0.929267	0.000129021	0	0	1	NA
AC009498.1	1	0	0	0	1	NA
AC009501.3	9.59081e-29	-0.0713472	0.039	0.099	3.03357e-24	NA
AC009505.1	0.186649	-0.0112991	0.018	0.022	1	NA
AC009506.1	0.0747828	-0.00615121	0.006	0.01	1	NA
AC009509.1	2.14517e-07	-0.00690802	0.001	0.008	0.00678516	NA
AC009509.2	0.929267	0.000165075	0	0	1	NA
AC009509.4	0.403717	0.000485588	0.002	0.001	1	NA
AC009511.1	1	0	0	0	1	NA
AC009511.2	0.103864	0.000395814	0.001	0	1	NA
AC009518.1	0.00585299	0.00489333	0.003	0.001	1	NA
AC009522.1	1.29575e-11	0.0233409	0.033	0.011	4.09846e-07	NA
AC009531.1	0.28699	-0.000669264	0	0	1	NA
AC009533.3	1	0	0	0	1	NA
AC009542.1	0.000269137	-0.00522902	0.001	0.006	1	NA
AC009549.1	0.331023	-0.00044202	0	0.001	1	NA
AC009554.1	3.50593e-16	-0.0412959	0.019	0.052	1.10893e-11	NA
AC009554.2	0.28699	-0.000234205	0	0	1	NA
AC009560.1	1	0	0	0	1	NA
AC009560.3	0.392408	-0.000346599	0.005	0.003	1	NA
AC009560.4	0.00075907	0.00544561	0.02	0.01	1	NA
AC009562.1	0.0139614	0.00436147	0.007	0.003	1	NA
AC009563.1	0.0100574	-0.00223217	0.001	0.003	1	NA
AC009567.1	0.0603584	0.00233425	0.001	0	1	NA
AC009570.1	0.0650792	-0.000582085	0	0.001	1	NA
AC009570.2	0.020037	0.00330595	0.008	0.004	1	NA
AC009597.1	0.103864	0.000934858	0.001	0	1	NA
AC009623.1	7.01242e-09	0.0112861	0.022	0.006	0.000221803	NA
AC009623.2	1	0	0	0	1	NA
AC009623.3	0.75821	0.000920821	0.001	0.001	1	NA
AC009630.1	0.00460732	0.00163853	0.038	0.026	1	NA
AC009630.2	0.132054	-0.000547765	0	0.001	1	NA
AC009630.3	0.265515	-0.00201469	0.003	0.004	1	NA
AC009646.2	0.416161	0.000899859	0.001	0.001	1	NA
AC009652.1	3.15711e-07	0.00933363	0.038	0.018	0.00998594	NA
AC009654.1	0.138357	0.00103412	0.001	0	1	NA
AC009682.1	0.0650792	-0.00069368	0	0.001	1	NA
AC009686.1	0.0596135	-0.00197078	0.001	0.003	1	NA
AC009686.2	0.103864	0.000462109	0.001	0	1	NA
AC009690.2	1.3553e-05	-0.0281991	0.04	0.061	0.42868	NA
AC009704.2	0.961019	-0.000315304	0.002	0.002	1	NA
AC009704.3	0.347874	0.000625531	0	0	1	NA
AC009716.1	0.0148533	-0.00370229	0.003	0.006	1	NA
AC009720.1	0.000241362	0.00753209	0.005	0.001	1	NA
AC009731.1	0.719043	0.000119921	0.002	0.001	1	NA
AC009754.1	0.39065	-0.00193981	0.01	0.008	1	NA
AC009754.2	0.0812824	0.00238809	0.01	0.006	1	NA
AC009779.2	0.727353	-0.000282561	0.013	0.012	1	NA
AC009779.5	0.395047	0.00084963	0.01	0.008	1	NA
AC009802.1	0.586159	0.000151029	0.001	0.001	1	NA
AC009803.1	0.720012	-0.00126798	0.002	0.001	1	NA
AC009803.2	0.184241	0.000619593	0	0	1	NA
AC009812.1	0.174553	-0.0050332	0.011	0.014	1	NA
AC009812.3	0.00140118	0.00578093	0.007	0.002	1	NA
AC009812.4	0.40454	-0.00273473	0.007	0.005	1	NA
AC009831.1	0.00339924	-0.00228947	0	0.003	1	NA
AC009831.3	1	0	0	0	1	NA
AC009835.1	0.103864	0.00146189	0.001	0	1	NA
AC009869.1	0.347874	0.000510348	0	0	1	NA
AC009878.2	6.52681e-78	-0.268583	0.141	0.286	2.06443e-73	NA
AC009879.4	7.65856e-14	0.0245569	0.118	0.067	2.4224e-09	NA
AC009884.1	0.000879174	-0.00526786	0.003	0.008	1	NA
AC009899.1	4.72983e-05	0.00757631	0.007	0.001	1	NA
AC009902.2	1	0	0	0	1	NA
AC009902.3	0.28699	-0.000614422	0	0	1	NA
AC009948.2	0.000100036	0.00102862	0.06	0.04	1	NA
AC009948.3	0.228694	-1.05391e-05	0.007	0.005	1	NA
AC009950.1	0.600247	0.000311298	0.003	0.004	1	NA
AC009951.5	0.0272423	-0.00525066	0.003	0.006	1	NA
AC009951.6	0.28699	-0.000723547	0	0	1	NA
AC009955.1	0.0785558	0.00217516	0.022	0.016	1	NA
AC009955.2	0.00133534	0.00211163	0.018	0.01	1	NA
AC009955.3	0.826508	-0.000157323	0.004	0.005	1	NA
AC009955.4	0.305973	-0.0020299	0.001	0.002	1	NA
AC009961.1	1.75392e-11	0.0320564	0.213	0.146	5.54765e-07	NA
AC009961.4	0.000110053	-0.00424323	0.001	0.006	1	NA
AC009962.1	0.0902607	0.00191831	0.007	0.004	1	NA
AC009965.1	0.639084	-0.000128076	0	0	1	NA
AC009970.1	0.184241	0.000206341	0	0	1	NA
AC009971.1	0.103864	0.000794321	0.001	0	1	NA
AC009974.1	0.132054	-0.00101107	0	0.001	1	NA
AC009974.2	0.0627654	-0.00170236	0	0.002	1	NA
AC009975.1	2.95386e-09	0.031894	0.036	0.015	9.34304e-05	NA
AC009975.2	6.54877e-08	0.0135558	0.014	0.003	0.00207138	NA
AC009996.1	1.88421e-08	0.0129143	0.023	0.007	0.000595976	NA
AC010082.1	0.000624381	-0.00296083	0	0.004	1	NA
AC010092.1	0.0460604	0.00102644	0.004	0.002	1	NA
AC010096.1	0.00030423	0.00349362	0.005	0.001	1	NA
AC010105.1	0.0157932	0.00356632	0.003	0.001	1	NA
AC010132.1	0.347874	0.000543344	0	0	1	NA
AC010132.4	0.383742	-0.000871033	0.007	0.005	1	NA
AC010136.1	0.946869	-0.00890848	0.02	0.02	1	NA
AC010145.1	0.000395294	0.00610777	0.006	0.001	1	NA
AC010148.1	2.48877e-29	0.0534796	0.091	0.03	7.87199e-25	NA
AC010149.1	0.452842	-0.000768042	0.007	0.008	1	NA
AC010157.1	1	0	0	0	1	NA
AC010168.1	4.35283e-66	0.167031	0.476	0.267	1.3768e-61	NA
AC010168.2	0.000718303	0.0019453	0.043	0.029	1	NA
AC010173.1	0.00437242	0.00552094	0.006	0.002	1	NA
AC010175.1	1.36175e-11	0.0134045	0.024	0.006	4.30721e-07	NA
AC010181.1	0.0603584	0.00192838	0.001	0	1	NA
AC010183.2	0.00183277	0.00355846	0.003	0	1	NA
AC010185.1	0.381235	0.000240716	0.001	0	1	NA
AC010186.3	2.13159e-09	0.0126245	0.034	0.013	6.74223e-05	NA
AC010196.1	1	0	0	0	1	NA
AC010197.1	0.000132848	0.00993915	0.008	0.002	1	NA
AC010198.1	0.00630871	-0.0218332	0.046	0.058	1	NA
AC010198.2	0.901497	0.000729986	0.014	0.015	1	NA
AC010201.1	0.607744	-0.000849048	0.001	0.002	1	NA
AC010201.2	0.0648787	0.00136488	0.01	0.006	1	NA
AC010201.3	2.91697e-18	0.0303496	0.128	0.066	9.22639e-14	NA
AC010203.2	0.381235	-0.000117839	0.001	0	1	NA
AC010205.1	0.0521909	0.000852218	0.007	0.003	1	NA
AC010207.1	3.09008e-06	0.00412363	0.014	0.004	0.0977392	NA
AC010210.1	6.97958e-18	0.0513905	0.399	0.28	2.20764e-13	NA
AC010226.1	0.895592	-0.0184863	0.074	0.071	1	NA
AC010230.1	0.489525	0.0032219	0.007	0.006	1	NA
AC010245.1	3.6555e-05	-0.0043009	0	0.004	1	NA
AC010245.2	0.113979	-0.000642886	0.007	0.005	1	NA
AC010247.1	1	0	0	0	1	NA
AC010247.2	0.928987	-0.000125207	0	0	1	NA
AC010255.1	0.831827	0.000532913	0.001	0.001	1	NA
AC010255.3	0.0150917	0.0019767	0.005	0.002	1	NA
AC010260.1	0.0654809	-0.00415886	0.007	0.011	1	NA
AC010261.1	0.0630475	-0.00051516	0	0.002	1	NA
AC010261.2	2.72963e-11	-0.0192061	0.006	0.024	8.63382e-07	NA
AC010266.2	0.184241	0.000377381	0	0	1	NA
AC010267.1	0.928987	-0.000206498	0	0	1	NA
AC010271.1	0.28699	-0.000167632	0	0	1	NA
AC010271.2	0.105282	-0.00146586	0.001	0.002	1	NA
AC010273.2	0.942205	-0.00305384	0.021	0.02	1	NA
AC010273.3	1	0	0	0	1	NA
AC010275.1	0.506773	0.0009389	0.001	0.001	1	NA
AC010280.1	0.0101769	0.00412902	0.004	0.001	1	NA
AC010280.2	1	0	0	0	1	NA
AC010285.1	1	0	0	0	1	NA
AC010285.3	0.00482227	-0.00209927	0	0.002	1	NA
AC010291.1	0.347874	0.000400339	0	0	1	NA
AC010300.1	0.0378229	-0.00693737	0.007	0.012	1	NA
AC010307.2	0.00462344	0.00454992	0.003	0	1	NA
AC010307.3	0.184241	0.00102795	0	0	1	NA
AC010307.4	0.28699	-0.00020291	0	0	1	NA
AC010319.3	1	0	0	0	1	NA
AC010319.4	0.0926112	0.00304623	0.004	0.002	1	NA
AC010319.5	0.928987	-0.000427372	0	0	1	NA
AC010320.1	0.0859095	2.9003e-05	0.002	0.001	1	NA
AC010320.2	4.45898e-24	-0.0366085	0.008	0.042	1.41038e-19	NA
AC010320.3	0.103613	-0.0050416	0.007	0.01	1	NA
AC010320.4	0.00210671	-0.0119674	0.012	0.02	1	NA
AC010325.1	0.0563441	0.00246468	0.003	0.001	1	NA
AC010325.2	0.28699	-0.000529662	0	0	1	NA
AC010326.3	5.0819e-09	0.00835095	0.014	0.002	0.000160741	NA
AC010327.4	0.000422282	0.0158844	0.184	0.15	1	NA
AC010327.5	0.294206	0.000577138	0.002	0.001	1	NA
AC010327.7	4.36113e-08	0.00725407	0.012	0.002	0.00137942	NA
AC010327.8	0.0153697	-0.00077799	0.013	0.008	1	NA
AC010328.1	0.507164	0.000133988	0.001	0.001	1	NA
AC010329.1	0.347874	0.000605387	0	0	1	NA
AC010331.1	0.000230629	-0.00414211	0.002	0.007	1	NA
AC010332.3	0.00199965	-0.00723797	0.004	0.01	1	NA
AC010333.1	0.103864	0.00033013	0.001	0	1	NA
AC010333.2	0.749757	0.000913184	0.004	0.004	1	NA
AC010335.1	1	0	0	0	1	NA
AC010336.1	0.00288879	0.00243517	0.003	0	1	NA
AC010336.4	1	0	0	0	1	NA
AC010336.6	0.0850361	-0.00265479	0.001	0.002	1	NA
AC010336.8	0.14289	0.00053398	0.007	0.005	1	NA
AC010343.3	0.0337174	-0.0154324	0.05	0.06	1	NA
AC010359.2	0.228921	0.000222163	0.001	0	1	NA
AC010359.3	0.000172724	0.00116038	0.047	0.03	1	NA
AC010378.2	1	0	0	0	1	NA
AC010395.1	0.138195	0.00161458	0.001	0	1	NA
AC010401.1	0.00906993	-0.00192708	0	0.002	1	NA
AC010401.2	0.184241	0.000389051	0	0	1	NA
AC010420.1	0.555836	-0.000280124	0	0.001	1	NA
AC010422.1	0.790436	0.000504441	0.002	0.002	1	NA
AC010422.2	0.290468	-0.00067546	0.005	0.003	1	NA
AC010422.4	0.664762	-0.000363639	0.001	0.001	1	NA
AC010422.7	0.28699	-0.000188337	0	0	1	NA
AC010442.1	0.285821	6.49054e-05	0.002	0.001	1	NA
AC010451.1	0.00922539	0.00448465	0.003	0.001	1	NA
AC010457.1	0.103864	0.00116489	0.001	0	1	NA
AC010463.3	0.825915	-0.000490426	0.001	0.002	1	NA
AC010468.2	1	0	0	0	1	NA
AC010476.2	5.65301e-22	0.0510063	0.092	0.038	1.78805e-17	NA
AC010487.2	1	0	0	0	1	NA
AC010491.1	0.00380638	-0.00999794	0.011	0.018	1	NA
AC010491.2	0.295414	0.000272602	0.007	0.006	1	NA
AC010494.1	1	0	0	0	1	NA
AC010501.2	0.00482227	-0.00132134	0	0.002	1	NA
AC010503.1	1	0	0	0	1	NA
AC010504.1	0.00897926	0.00399791	0.017	0.01	1	NA
AC010511.1	0.0466507	0.00296198	0.005	0.002	1	NA
AC010519.1	3.16877e-19	0.0288425	0.034	0.005	1.00228e-14	NA
AC010524.1	5.01457e-08	-0.0114048	0.003	0.014	0.00158611	NA
AC010528.1	0.014545	0.00341461	0.003	0.001	1	NA
AC010528.2	0.184241	0.000823787	0	0	1	NA
AC010530.1	0.00197967	0.00355402	0.007	0.002	1	NA
AC010531.3	0.0446642	-0.00249812	0.002	0.004	1	NA
AC010531.4	0.0603584	0.000730863	0.001	0	1	NA
AC010531.5	0.000186961	-0.00824583	0.005	0.013	1	NA
AC010531.6	0.049331	-0.00244333	0.001	0.003	1	NA
AC010536.1	0.012951	0.00116897	0.002	0	1	NA
AC010536.2	0.103864	0.000303739	0.001	0	1	NA
AC010538.1	0.00261359	0.00299264	0.01	0.004	1	NA
AC010542.2	3.6555e-05	-0.00407286	0	0.004	1	NA
AC010542.4	0.0315494	0.00235889	0.002	0	1	NA
AC010542.5	1	0	0	0	1	NA
AC010547.1	0.272506	0.000493573	0.009	0.007	1	NA
AC010547.3	0.899397	-0.000823962	0	0.001	1	NA
AC010601.1	0.00318259	0.00328631	0.006	0.002	1	NA
AC010609.1	0.713664	0.000135619	0.003	0.002	1	NA
AC010615.2	0.0270892	-0.00888667	0.009	0.014	1	NA
AC010618.2	0.0397226	-0.00232367	0.001	0.003	1	NA
AC010618.3	0.444027	-0.0135454	0.128	0.118	1	NA
AC010623.1	0.310324	0.00139647	0.008	0.006	1	NA
AC010624.1	0.0155438	0.00313957	0.006	0.003	1	NA
AC010624.3	0.184241	0.000832748	0	0	1	NA
AC010624.5	0.251818	-0.00252129	0.011	0.014	1	NA
AC010632.1	0.988111	-0.00723374	0.034	0.033	1	NA
AC010632.2	0.000172398	0.00530716	0.03	0.017	1	NA
AC010634.1	0.347874	0.000359105	0	0	1	NA
AC010636.1	0.28699	-0.000533294	0	0	1	NA
AC010638.1	1.25809e-06	-0.0172594	0.011	0.024	0.0397934	NA
AC010641.2	0.382302	0.00107455	0.003	0.002	1	NA
AC010642.2	0.171966	-0.00264391	0.028	0.023	1	NA
AC010643.1	0.000354211	0.00529746	0.006	0.001	1	NA
AC010649.1	0.641202	-0.00169531	0.002	0.002	1	NA
AC010654.1	0.186281	-0.00205188	0.002	0.004	1	NA
AC010677.2	0.00149511	0.00445869	0.004	0.001	1	NA
AC010680.1	0	-0.551037	0.105	0.448	0	NA
AC010680.2	3.56963e-28	0.0350974	0.103	0.037	1.12907e-23	NA
AC010680.3	0.00531067	0.000262958	0.018	0.011	1	NA
AC010680.4	0.717894	-0.0090368	0.02	0.021	1	NA
AC010680.5	7.14023e-43	-0.0959326	0.029	0.101	2.25846e-38	NA
AC010719.1	0.832415	-0.000105931	0.001	0.001	1	NA
AC010727.1	0.877617	0.000109788	0.001	0.001	1	NA
AC010729.2	0.379381	-0.00293112	0.005	0.007	1	NA
AC010731.2	0.0235575	-0.00431913	0.001	0.004	1	NA
AC010735.1	0.665105	-0.000232048	0.001	0.001	1	NA
AC010735.2	0.0156434	0.0038362	0.021	0.014	1	NA
AC010737.1	0.012951	0.000942381	0.002	0	1	NA
AC010745.2	0.00209393	0.00463812	0.005	0.001	1	NA
AC010745.5	0.0603584	0.00193108	0.001	0	1	NA
AC010746.2	1	0	0	0	1	NA
AC010754.1	0.0887943	0.00092874	0.002	0.001	1	NA
AC010761.1	0.00482227	-0.00162844	0	0.002	1	NA
AC010761.2	0.192715	0.00160023	0.002	0.001	1	NA
AC010761.3	0.613078	-0.00112913	0.002	0.002	1	NA
AC010761.4	1	0	0	0	1	NA
AC010768.1	1	0	0	0	1	NA
AC010768.2	1	0	0	0	1	NA
AC010776.1	0.000752718	-0.00261768	0	0.003	1	NA
AC010776.2	0.00906993	-0.00172063	0	0.002	1	NA
AC010776.3	0.0331497	-0.00122497	0	0.001	1	NA
AC010789.1	0.404393	-0.000539676	0.002	0.001	1	NA
AC010789.2	4.50521e-07	0.0108304	0.026	0.011	0.01425	NA
AC010809.1	2.36174e-09	0.0128737	0.04	0.018	7.47019e-05	NA
AC010809.2	3.4324e-05	0.00706426	0.019	0.008	1	NA
AC010809.3	0.000704139	0.00178104	0.003	0	1	NA
AC010834.1	0.137363	-0.000965787	0	0.001	1	NA
AC010834.2	0.55922	6.44685e-05	0.005	0.004	1	NA
AC010834.3	0.000877971	0.0040638	0.009	0.003	1	NA
AC010864.1	0.803614	0.000222829	0.002	0.002	1	NA
AC010880.1	0.00030492	0.00461548	0.005	0.001	1	NA
AC010883.1	0.00039292	0.00580848	0.006	0.001	1	NA
AC010883.2	0.899594	-0.000515086	0	0.001	1	NA
AC010883.3	0.0814479	-0.000953521	0.023	0.017	1	NA
AC010884.1	0.813326	-0.000534827	0.02	0.019	1	NA
AC010884.2	0.103864	0.00103439	0.001	0	1	NA
AC010889.1	1.0559e-09	0.00682397	0.01	0	3.33983e-05	NA
AC010889.2	5.0151e-17	0.0129009	0.018	0	1.58628e-12	NA
AC010894.2	0.00500386	-0.00358637	0.001	0.004	1	NA
AC010894.3	0.0150847	0.00697608	0.028	0.02	1	NA
AC010894.4	1	0	0	0	1	NA
AC010896.1	0.0013856	0.0032939	0.007	0.002	1	NA
AC010904.2	0.103864	0.000868337	0.001	0	1	NA
AC010907.2	0.103864	0.000814526	0.001	0	1	NA
AC010913.1	0.0650792	-0.00162751	0	0.001	1	NA
AC010931.2	0.486308	-0.000759203	0.002	0.001	1	NA
AC010931.3	0.0885581	0.00276642	0.002	0.001	1	NA
AC010967.1	1.37238e-41	-0.204877	0.096	0.2	4.34084e-37	NA
AC010967.2	0.28699	-0.000304969	0	0	1	NA
AC010969.1	1	0	0	0	1	NA
AC010969.2	5.7106e-05	0.00493102	0.008	0.002	1	NA
AC010969.3	0.347874	0.00034332	0	0	1	NA
AC010973.1	0.368777	-0.000980191	0.003	0.004	1	NA
AC010973.2	0.485462	0.000538806	0.002	0.001	1	NA
AC010974.1	0.103864	0.00175357	0.001	0	1	NA
AC010974.2	2.75321e-09	-0.0484131	0.044	0.073	8.7084e-05	NA
AC010975.1	0.347874	0.00012843	0	0	1	NA
AC010976.1	2.91321e-12	-0.0490256	0.039	0.073	9.21449e-08	NA
AC010976.2	2.29697e-11	-0.0216288	0.004	0.019	7.26532e-07	NA
AC010978.1	1.10195e-05	-0.00895002	0.002	0.01	0.348546	NA
AC010980.1	0.804482	-0.0010312	0.002	0.002	1	NA
AC010983.1	0.0603584	0.00168205	0.001	0	1	NA
AC010987.1	0.744193	-0.00149223	0.003	0.003	1	NA
AC010991.1	0.00024215	0.0058237	0.005	0.001	1	NA
AC010996.1	0.162399	0.000894986	0.008	0.006	1	NA
AC010997.2	1	0	0	0	1	NA
AC010997.3	0.000131915	-0.0122973	0.018	0.031	1	NA
AC010997.4	0.78745	-0.000974365	0.002	0.002	1	NA
AC010997.5	7.52074e-09	-0.0102532	0.001	0.01	0.000237881	NA
AC010998.1	0.288705	2.3662e-05	0.003	0.002	1	NA
AC010998.2	0.60025	-0.000764207	0.001	0.001	1	NA
AC010999.1	0.132054	-0.000459617	0	0.001	1	NA
AC010999.2	0.192489	-0.000530647	0	0.001	1	NA
AC011005.1	0.0841967	0.00118632	0.001	0	1	NA
AC011008.1	0.638878	0.00040847	0	0	1	NA
AC011029.1	3.8981e-05	0.0224032	0.028	0.015	1	NA
AC011043.1	0.0681084	-0.00289955	0.031	0.024	1	NA
AC011043.2	0.928987	-0.000148275	0	0	1	NA
AC011092.2	6.08818e-38	-0.0893421	0.035	0.106	1.92569e-33	NA
AC011092.3	4.16631e-09	-0.0184079	0.005	0.019	0.00013178	NA
AC011095.1	0.639084	0.000196592	0	0	1	NA
AC011124.1	0.0797754	0.00149996	0.003	0.001	1	NA
AC011124.2	0.0357278	0.00127796	0.001	0	1	NA
AC011131.1	0.184241	0.000694532	0	0	1	NA
AC011139.1	0.28699	-0.000785533	0	0	1	NA
AC011193.1	0.184241	0.000766284	0	0	1	NA
AC011228.2	0.0357278	0.00162421	0.001	0	1	NA
AC011233.2	0.347874	0.000373658	0	0	1	NA
AC011239.1	0.347874	0.000216874	0	0	1	NA
AC011243.1	0.141811	-0.00130608	0.001	0.002	1	NA
AC011246.1	3.69814e-09	-0.0935949	0.043	0.072	0.000116972	NA
AC011247.1	0.347874	0.000140296	0	0	1	NA
AC011257.1	0.0603584	0.00110232	0.001	0	1	NA
AC011284.1	0.584605	-0.000764436	0.001	0.001	1	NA
AC011287.1	1.41171e-145	0.236293	0.956	0.859	4.46523e-141	NA
AC011287.2	2.16497e-13	-0.0363534	0.022	0.051	6.8478e-09	NA
AC011290.1	0.0751449	0.0015381	0.013	0.008	1	NA
AC011294.1	0.122556	0.00382637	0.009	0.006	1	NA
AC011298.1	0.28699	-0.000906058	0	0	1	NA
AC011306.1	0.000532898	0.00445264	0.014	0.006	1	NA
AC011313.1	0.103864	0.00122523	0.001	0	1	NA
AC011317.1	0.755085	-0.000451656	0.003	0.003	1	NA
AC011322.1	0.138357	0.000926644	0.001	0	1	NA
AC011330.2	0.361913	-0.00188278	0.006	0.005	1	NA
AC011337.1	0.885148	-0.000191775	0.001	0.001	1	NA
AC011346.1	7.25194e-74	0.234683	0.651	0.424	2.29379e-69	NA
AC011351.1	0.0120145	-0.0221274	0.029	0.038	1	NA
AC011352.1	0.0357278	0.000773467	0.001	0	1	NA
AC011362.1	0.0603584	0.0022344	0.001	0	1	NA
AC011363.1	1	0	0	0	1	NA
AC011365.1	0.258989	-0.0018126	0.002	0.004	1	NA
AC011365.2	0.507034	0.000542379	0.001	0.001	1	NA
AC011369.1	1.94441e-52	-0.193461	0.151	0.266	6.15018e-48	NA
AC011370.1	1	0	0	0	1	NA
AC011373.1	0.28699	-0.000189106	0	0	1	NA
AC011374.1	0.639084	-6.33319e-05	0	0	1	NA
AC011374.2	1	0	0	0	1	NA
AC011374.3	1	0	0	0	1	NA
AC011377.1	0.285465	0.000926197	0.002	0.001	1	NA
AC011379.1	1.34409e-05	-0.00223073	0.053	0.032	0.425137	NA
AC011379.2	0.314326	-9.10785e-05	0.005	0.003	1	NA
AC011383.1	0.000262028	-0.0102606	0.011	0.02	1	NA
AC011389.1	0.103401	-0.00209932	0.002	0.003	1	NA
AC011389.2	0.132054	-0.000539202	0	0.001	1	NA
AC011396.2	0.0242162	0.00306844	0.006	0.002	1	NA
AC011405.1	2.57991e-08	-0.0236365	0.019	0.039	0.000816027	NA
AC011407.1	0.685663	-0.00339884	0.005	0.005	1	NA
AC011416.3	0.715806	-0.00304846	0.004	0.004	1	NA
AC011416.4	0.00180272	0.00426261	0.003	0	1	NA
AC011442.1	0.321217	-0.00239478	0.002	0.003	1	NA
AC011443.1	0.000129542	-0.00558714	0.002	0.008	1	NA
AC011444.1	1.4082e-07	-0.0180258	0.012	0.028	0.00445415	NA
AC011444.2	0.226822	-0.00767083	0.013	0.016	1	NA
AC011444.3	0.000196506	0.00819547	0.008	0.002	1	NA
AC011445.1	1	0	0	0	1	NA
AC011445.2	0.841598	-0.000527823	0.001	0.001	1	NA
AC011446.1	0.031602	0.00145634	0.002	0	1	NA
AC011446.2	1	0	0	0	1	NA
AC011446.3	1	0	0	0	1	NA
AC011447.3	0.764123	-0.00643831	0.053	0.051	1	NA
AC011450.1	0.161497	0.00131416	0.008	0.006	1	NA
AC011451.1	0.28699	-0.000170062	0	0	1	NA
AC011451.3	0.0202494	-0.00126429	0.058	0.045	1	NA
AC011451.4	0.0357278	0.000926547	0.001	0	1	NA
AC011453.1	1	0	0	0	1	NA
AC011455.1	0.0887352	0.00145411	0.002	0.001	1	NA
AC011455.6	0.375249	0.00410006	0.01	0.008	1	NA
AC011461.1	0.758888	0.000142088	0.001	0.001	1	NA
AC011462.3	0.103864	0.000559093	0.001	0	1	NA
AC011462.4	0.612872	-0.000435857	0.004	0.004	1	NA
AC011462.5	0.257359	-0.0017944	0.002	0.004	1	NA
AC011466.1	0.787951	-0.00108194	0.006	0.006	1	NA
AC011466.2	1	0	0	0	1	NA
AC011466.3	0.344955	-0.000477863	0.002	0.003	1	NA
AC011467.1	0.0259238	-0.0020145	0.002	0.005	1	NA
AC011468.1	0.365332	6.38724e-06	0.004	0.003	1	NA
AC011468.3	0.555836	-0.000539173	0	0.001	1	NA
AC011468.5	1.46823e-05	-0.00818453	0.004	0.012	0.464402	NA
AC011471.2	0.0627654	-0.00222089	0	0.002	1	NA
AC011472.1	1.56688e-10	0.0220817	0.106	0.063	4.95603e-06	NA
AC011472.2	0.000658185	0.00516701	0.007	0.002	1	NA
AC011472.3	0.28699	-0.000750963	0	0	1	NA
AC011472.4	0.043358	-0.00185134	0.014	0.009	1	NA
AC011473.1	0.103864	0.000947466	0.001	0	1	NA
AC011473.3	1	0	0	0	1	NA
AC011474.1	0.00019704	0.00959454	0.008	0.002	1	NA
AC011476.3	0.000409497	0.00824459	0.054	0.037	1	NA
AC011477.2	4.49098e-06	0.00664144	0.022	0.009	0.14205	NA
AC011477.3	0.877136	-0.000138116	0.001	0.001	1	NA
AC011477.8	0.00113456	0.0021962	0.003	0	1	NA
AC011477.9	2.05632e-05	-0.0221544	0.03	0.047	0.650415	NA
AC011478.1	0.405174	-0.000451235	0.001	0.002	1	NA
AC011479.2	6.81639e-06	0.0040442	0.006	0	0.215602	NA
AC011479.3	0.000240872	0.00339905	0.005	0.001	1	NA
AC011481.1	0.179988	0.0012022	0.014	0.011	1	NA
AC011481.2	0.05662	0.000878774	0.003	0.001	1	NA
AC011483.1	0.26066	-0.00163006	0.008	0.006	1	NA
AC011483.2	0.0887056	0.00177836	0.002	0.001	1	NA
AC011484.1	0.491537	-0.00103172	0	0.001	1	NA
AC011491.3	0.00975978	0.00402	0.005	0.002	1	NA
AC011495.2	1	0	0	0	1	NA
AC011495.3	1	0	0	0	1	NA
AC011498.1	0.00232075	0.00636002	0.012	0.006	1	NA
AC011498.3	1	0	0	0	1	NA
AC011498.6	0.0357278	0.000917293	0.001	0	1	NA
AC011503.1	0.293732	0.00183293	0.002	0.001	1	NA
AC011503.2	0.28699	-0.000452557	0	0	1	NA
AC011503.4	0.347874	0.000199728	0	0	1	NA
AC011507.1	0.00288001	0.00547569	0.003	0	1	NA
AC011509.2	0.000169019	0.00795704	0.011	0.004	1	NA
AC011509.3	0.138303	0.00119613	0.001	0	1	NA
AC011510.1	1	0	0	0	1	NA
AC011511.2	0.702169	0.000278749	0.008	0.008	1	NA
AC011511.3	0.28699	-0.000287015	0	0	1	NA
AC011511.5	0.103864	0.00101555	0.001	0	1	NA
AC011516.1	0.184241	0.000390706	0	0	1	NA
AC011523.1	0.138412	0.000651672	0.001	0	1	NA
AC011524.1	0.132054	-0.000431097	0	0.001	1	NA
AC011524.2	3.49228e-10	-0.0131115	0.003	0.017	1.10461e-05	NA
AC011525.1	0.184241	0.00112697	0	0	1	NA
AC011586.1	0.210901	0.00123192	0.003	0.001	1	NA
AC011586.2	7.3769e-09	0.0191745	0.017	0.003	0.000233331	NA
AC011591.1	1	0	0	0	1	NA
AC011593.1	0.00482894	0.00262317	0.002	0	1	NA
AC011595.1	1.09347e-05	-0.00879645	0.002	0.01	0.345866	NA
AC011595.2	0.832709	-0.000622414	0.001	0.001	1	NA
AC011603.1	1	0	0	0	1	NA
AC011603.2	1.16554e-45	0.0926856	0.189	0.077	3.68662e-41	NA
AC011611.3	1	0	0	0	1	NA
AC011611.4	0.491899	8.48877e-05	0	0.001	1	NA
AC011625.1	6.56092e-05	-0.00846773	0.004	0.012	1	NA
AC011632.1	0.193074	0.000884875	0.002	0.001	1	NA
AC011632.2	0.184241	0.00104114	0	0	1	NA
AC011676.1	0.000183988	0.00533836	0.007	0.002	1	NA
AC011676.2	0.331918	0.000762062	0.001	0.001	1	NA
AC011676.3	0.775916	-0.000689937	0.002	0.003	1	NA
AC011700.1	1.70918e-07	0.0126527	0.02	0.007	0.00540615	NA
AC011726.2	9.50467e-05	0.00215851	0.009	0.002	1	NA
AC011726.3	0.0357278	0.000801083	0.001	0	1	NA
AC011731.1	1	0	0	0	1	NA
AC011747.1	0.103864	0.00135826	0.001	0	1	NA
AC011751.1	0.0300092	0.00263086	0.006	0.003	1	NA
AC011752.1	1	0	0	0	1	NA
AC011753.2	0.072913	-8.91746e-05	0.003	0.001	1	NA
AC011754.1	0.184241	0.00143134	0	0	1	NA
AC011754.2	0.00183277	0.00319086	0.003	0	1	NA
AC011773.1	0.0650792	-0.000953116	0	0.001	1	NA
AC011773.2	0.138357	0.000522537	0.001	0	1	NA
AC011773.3	5.19155e-07	-0.0122326	0.007	0.02	0.0164209	NA
AC011773.4	0.310422	-0.00533682	0.014	0.017	1	NA
AC011815.1	0.0156847	-0.00081221	0.022	0.014	1	NA
AC011815.2	0.00022961	-0.0139719	0.011	0.022	1	NA
AC011816.2	0.28699	-0.000768163	0	0	1	NA
AC011824.1	1	0	0	0	1	NA
AC011824.2	0.0214136	0.00225281	0.001	0	1	NA
AC011825.2	0.874009	-0.0017469	0.006	0.006	1	NA
AC011825.4	0.826587	-0.000279548	0.001	0.002	1	NA
AC011840.1	1	0	0	0	1	NA
AC011841.1	0.0858842	0.000983455	0.002	0.001	1	NA
AC011853.2	0.638878	0.00031423	0	0	1	NA
AC011897.1	0.00788683	0.00280245	0.002	0	1	NA
AC011899.2	1	0	0	0	1	NA
AC011899.4	1	0	0	0	1	NA
AC011900.1	0.000704139	0.00626655	0.003	0	1	NA
AC011901.1	0.012951	0.00264806	0.002	0	1	NA
AC011912.1	0.285465	0.000564535	0.002	0.001	1	NA
AC011921.1	1.32238e-07	0.0129549	0.041	0.02	0.00418268	NA
AC011933.2	0.850331	-0.00326258	0.006	0.007	1	NA
AC011933.3	1	0	0	0	1	NA
AC011933.4	2.38479e-16	-0.0350745	0.017	0.049	7.54309e-12	NA
AC011939.2	9.71546e-05	0.00498023	0.019	0.009	1	NA
AC011939.3	0.012951	0.00113303	0.002	0	1	NA
AC011944.1	0.928987	-0.000201013	0	0	1	NA
AC011978.2	0.0241906	0.000840788	0.004	0.001	1	NA
AC011990.1	0.490439	-0.000342664	0.006	0.005	1	NA
AC011995.2	0.0664862	-0.00130786	0.007	0.011	1	NA
AC011997.1	1.41091e-11	0.022251	0.168	0.108	4.4627e-07	NA
AC011997.2	3.10343e-60	-0.160611	0.078	0.193	9.81614e-56	NA
AC012020.1	3.49119e-06	0.00582601	0.034	0.017	0.110426	NA
AC012038.1	0.00848849	-0.00354005	0.001	0.004	1	NA
AC012038.2	0.0228989	0.00171832	0.003	0.001	1	NA
AC012050.1	1	0	0	0	1	NA
AC012055.1	0.19236	-0.000996362	0	0.001	1	NA
AC012060.1	1.04506e-05	-0.0167012	0.011	0.024	0.330554	NA
[truncated: 28,845 more rows]

## Sheet: Supplemental Table5C
Gene	p_val	avg_log2FC	pct.1	pct.2	p_val_adj	Chromosome
A1BG	0.0503151	0.00183484	0.002	0.001	1	chr-19
A1BG-AS1	0.00438298	0.00100291	0.006	0.002	1	chr-19
A1CF	0.00969773	0.00582569	0.008	0.004	1	chr-10
A2M	0.000225459	-0.0614209	0.19	0.219	1	chr-12
A2M-AS1	1.24975871144239e-08	0.0201401	0.091	0.061	0.000395299	chr-12
A2ML1	0.00161681	0.00733628	0.011	0.005	1	chr-12
A2ML1-AS1	7.66755151803945e-35	-0.0208542	0.004	0.045	2.42524654515588e-30	chr-12
A3GALT2	0.578189	-3.32317e-06	0.004	0.004	1	chr-1
A4GALT	6.77097801988312e-80	0.125346	0.438	0.237	2.14166034768903e-75	chr-22
A4GNT	0.272957	0.00033326	0	0	1	chr-3
AAAS	4.65287755331354e-05	0.0270045	0.111	0.09	1	chr-12
AACS	3.35761983162081e-29	0.0474932	0.199	0.116	1.06201515274166e-24	chr-12
AADAC	0.0282912	0.000883304	0.001	0	1	chr-3
AADACL2	0.0575308	0.00153286	0.001	0	1	chr-3
AADACL2-AS1	3.70228294604352e-15	0.0190639	0.014	0.001	1.17103209583356e-10	chr-3
AADACL3	0.0575308	0.00205407	0.001	0	1	chr-1
AADACL4	0.794612	-0.000421877	0.001	0.001	1	chr-1
AADAT	0.811635	0.00447687	0.046	0.048	1	chr-4
AAGAB	6.71197483572081e-34	0.0673407	0.187	0.104	2.12299764053849e-29	chr-15
AAK1	1.75106608839089e-14	0.134328	0.926	0.753	5.53862203758038e-10	chr-2
AAMDC	1.31778041097999e-30	0.0441289	0.461	0.317	4.16813943992972e-26	chr-11
AAMP	0.546988	0.00464491	0.029	0.031	1	chr-2
AANAT	0.0122224	0.00379288	0.004	0.001	1	chr-17
AAR2	0.0107105	0.0122733	0.065	0.053	1	chr-20
AARD	0.0575308	0.000410927	0.001	0	1	chr-8
AARS	2.07625242418818e-46	0.0864425	0.188	0.09	6.56718641770721e-42	NA
AARS2	4.1968083300149e-06	0.0240586	0.065	0.045	0.132745	chr-6
AARSD1	1.51352727888508e-06	0.0229549	0.156	0.126	0.0478729	chr-17
AASDH	3.7290176100386e-12	0.0445051	0.221	0.17	1.17948827005521e-07	chr-4
AASDHPPT	0.000313504	0.0198376	0.15	0.129	1	chr-11
AASS	3.2815063204144e-80	0.147582	0.54	0.323	1.03794044914707e-75	chr-7
AATBC	0.234637	-1.24781e-05	0.001	0	1	chr-21
AATF	2.66840473658988e-34	0.0733834	0.196	0.11	8.44016418183379e-30	chr-17
AATK	1.7763914546905e-07	0.0117502	0.069	0.044	0.00561873	chr-17
ABALON	0.731096	-0.000166814	0.001	0.001	1	chr-20
ABAT	4.72759345313199e-81	0.111347	0.274	0.115	1.49533780922565e-76	chr-16
ABCA1	2.04996568345754e-68	0.139513	0.458	0.271	6.4840414567762e-64	chr-9
ABCA10	4.28125459183005e-26	0.0439987	0.11	0.053	1.35416082739584e-21	chr-17
ABCA12	1.1573670855711e-12	0.0191598	0.017	0.003	3.66075209166139e-08	chr-2
ABCA13	2.71079107678498e-09	0.025367	0.025	0.01	8.57423217587089e-05	chr-7
ABCA2	1.20698039164481e-07	0.0150552	0.047	0.026	0.00381768	chr-9
ABCA3	1.67245168710008e-08	0.0270596	0.083	0.055	0.000528996	chr-16
ABCA4	0.00803163	0.00382868	0.005	0.002	1	chr-1
ABCA5	2.37667048286767e-65	0.129346	0.511	0.309	7.51740873731045e-61	chr-17
ABCA6	3.21365398843579e-06	-0.0177172	0.062	0.089	0.101648	chr-17
ABCA7	2.25739157923542e-19	0.0343165	0.077	0.035	7.14012956512164e-15	chr-19
ABCA8	9.67820506032033e-78	0.163395	0.429	0.246	3.06121626057932e-73	chr-17
ABCA9	6.08160185902396e-09	0.00663559	0.034	0.016	0.000192361	chr-17
ABCA9-AS1	0.00533792	0.010282	0.011	0.006	1	chr-17
ABCB1	0.02099	0.00467472	0.015	0.01	1	chr-7
ABCB10	4.15634814953284e-18	0.046123	0.236	0.17	1.31465291969724e-13	chr-1
ABCB11	0.00490804	0.00229026	0.009	0.004	1	chr-2
ABCB4	0.00106617	-0.0121524	0.263	0.229	1	chr-7
ABCB5	2.36147092229155e-05	0.00950454	0.011	0.004	0.746933	chr-7
ABCB6	5.41450189697203e-06	0.0173959	0.043	0.026	0.171261	chr-2
ABCB8	3.9961177389275e-23	0.0815451	0.242	0.17	1.26397204082277e-18	chr-7
ABCB9	4.00316138131871e-09	0.0223536	0.078	0.05	0.00012662	chr-12
ABCC1	7.14446682155058e-140	0.214345	0.631	0.328	2.25979485565645e-135	chr-16
ABCC10	4.39837548541661e-13	0.0383862	0.137	0.093	1.39120616603727e-08	chr-6
ABCC11	0.00342766	0.0108141	0.011	0.005	1	chr-16
ABCC12	0.00999779	0.00411766	0.003	0.001	1	chr-16
ABCC2	9.79893468568495e-09	0.0103345	0.018	0.006	0.00030994	chr-10
ABCC3	0.000239987	0.00810217	0.008	0.003	1	chr-17
ABCC4	5.59561070632682e-24	0.0424276	0.061	0.021	1.76989166641117e-19	chr-13
ABCC5	5.6944210852583e-115	0.291875	0.77	0.459	1.8011453892672e-110	chr-3
ABCC5-AS1	4.03170735195307e-07	-0.00832886	0.01	0.024	0.0127523	chr-3
ABCC6	0.00355113	-0.00183924	0.012	0.02	1	chr-16
ABCC8	8.49176760733314e-08	-0.0267916	0.069	0.102	0.00268595	chr-11
ABCC9	2.68528113825825e-15	0.0731454	0.671	0.442	8.49354424031085e-11	chr-12
ABCD2	3.12242700618125e-33	0.0758379	0.261	0.163	9.8762366205513e-29	chr-12
ABCD3	1.62279564262564e-107	0.227728	0.581	0.33	5.13290261762489e-103	chr-1
ABCD4	0.128727	0.0129407	0.127	0.121	1	chr-14
ABCE1	0.000792823	0.0149066	0.143	0.124	1	chr-4
ABCF1	3.64545154517892e-06	0.0430198	0.136	0.11	0.115306	chr-6
ABCF2	0.000253262	0.0178605	0.059	0.043	1	chr-7
ABCF3	0.00528963	0.00275285	0.072	0.09	1	chr-3
ABCG1	0.0293406	-0.00257912	0.155	0.141	1	chr-21
ABCG2	0.626474	0.0125489	0.113	0.114	1	chr-4
ABCG4	0.704467	0.000441995	0.004	0.004	1	chr-11
ABCG5	0.372956	0.00355131	0.004	0.003	1	chr-2
ABCG8	0.389302	-0.000655446	0.003	0.002	1	chr-2
ABHD1	7.86171906660598e-06	0.0200975	0.044	0.028	0.248666	chr-2
ABHD10	9.9424056896245e-08	0.036355	0.15	0.118	0.00314478	chr-3
ABHD11	0.00287188	-0.00238438	0.014	0.023	1	chr-7
ABHD12	8.44391443621115e-29	0.0627381	0.272	0.179	2.67081013617359e-24	chr-20
ABHD12B	0.00327574	0.00464019	0.004	0.001	1	chr-14
ABHD13	3.04080929387148e-12	0.0465752	0.153	0.11	9.61807979651549e-08	chr-13
ABHD14A	4.971600862595e-11	-0.00903719	0.015	0.037	1.5725173528388e-06	chr-3
ABHD14B	0.00443065	-2.05804e-07	0.051	0.067	1	chr-3
ABHD15	0.000909148	0.00637252	0.014	0.007	1	chr-17
ABHD15-AS1	0.000135124	-0.00635695	0.089	0.117	1	chr-17
ABHD16A	4.27785657291433e-09	0.0225701	0.075	0.047	0.000135309	chr-6
ABHD17A	2.40235317385178e-11	0.0217731	0.073	0.041	7.59864308889319e-07	chr-19
ABHD17B	3.76463735362859e-21	0.0503873	0.198	0.13	1.19075479495272e-16	chr-9
ABHD17C	0.00230653	0.0177499	0.097	0.081	1	chr-15
ABHD18	1.12905013644923e-82	0.242654	0.745	0.439	3.5711855815889e-78	chr-4
ABHD2	7.12183367049568e-121	0.281512	0.723	0.45	2.25263598997778e-116	chr-15
ABHD3	4.63411581931171e-20	0.0203451	0.324	0.23	1.46577083364829e-15	chr-18
ABHD4	0.0716671	0.0106216	0.042	0.035	1	chr-14
ABHD5	1.86482961331925e-08	0.0299217	0.138	0.103	0.000589846	chr-3
ABHD6	0.214554	0.00629334	0.108	0.103	1	chr-3
ABHD8	0.99479	1.37609801890565e-05	0.055	0.056	1	chr-19
ABI1	4.07883825675025e-36	0.0740136	0.433	0.285	1.2901365406101e-31	chr-10
ABI2	6.00333619533148e-97	0.190362	0.608	0.344	1.89885523858335e-92	chr-2
ABI3	0.891982	-0.000752118	0.001	0.001	1	chr-17
ABI3BP	0.0666599	-0.0348208	0.125	0.139	1	chr-3
ABITRAM	0.455058	0.00874926	0.076	0.074	1	chr-9
ABL1	1.05905776140828e-109	0.235392	0.752	0.45	3.34979969933439e-105	chr-9
ABL2	4.33387614451985e-95	0.163218	0.482	0.267	1.37080502451163e-90	chr-1
ABLIM1	8.30501012693839e-06	0.0222492	0.998	0.991	0.262687	chr-10
ABLIM2	9.9544290106123e-75	0.129613	0.472	0.268	3.14858589605667e-70	chr-4
ABLIM3	3.08467496611537e-56	0.104512	0.423	0.259	9.75682691782291e-52	chr-5
ABO	1.15099925750827e-09	0.00840638	0.032	0.013	3.64061065149867e-05	chr-9
ABR	4.29845910767721e-105	0.223892	0.806	0.49	1.3596026157583e-100	chr-17
ABRA	0.00200251	-0.148795	0.242	0.252	1	chr-8
ABRACL	0.00208391	0.00354176	0.005	0.002	1	chr-6
ABRAXAS1	0.0237052	0.0158076	0.059	0.05	1	chr-4
ABRAXAS2	1.59177377055191e-24	0.063327	0.175	0.107	5.0347804362557e-20	chr-10
ABT1	0.807469	0.000545198	0.014	0.014	1	chr-6
ABTB1	0.187443	0.00563497	0.022	0.018	1	chr-3
ABTB2	8.98568217888792e-43	0.115978	0.631	0.428	2.84217127318225e-38	chr-11
AC000032.1	0.272957	0.000115043	0	0	1	NA
AC000036.1	1	0	0	0	1	NA
AC000050.1	0.272957	0.000330782	0	0	1	NA
AC000058.1	0.00195058	0.00272482	0.006	0.002	1	NA
AC000061.1	0.00448738	0.00542927	0.004	0.001	1	NA
AC000065.1	1.26465313859256e-07	-0.00919692	0.013	0.03	0.0040001	NA
AC000065.2	6.46527606367148e-05	0.00390781	0.018	0.008	1	NA
AC000068.1	0.113576	0.000181867	0.003	0.005	1	NA
AC000068.2	0.114181	-0.000317649	0	0.001	1	NA
AC000068.3	0.272957	0.000240032	0	0	1	NA
AC000072.1	0.82092	0.000523114	0.001	0.001	1	NA
AC000082.1	1	0	0	0	1	NA
AC000085.1	1.24800571464356e-14	0.0488217	0.109	0.067	3.94744207541759e-10	NA
AC000099.1	0.272957	0.000398746	0	0	1	NA
AC000113.1	2.1934581473263e-05	0.00532556	0.007	0.001	0.693791	NA
AC000120.1	2.46733667824862e-05	0.00597732	0.01	0.003	0.780419	NA
AC000123.1	1	0	0	0	1	NA
AC000124.1	0.0167649	0.0026413	0.002	0	1	NA
AC000372.1	0.000387569	0.00400156	0.004	0	1	NA
AC000403.1	1	0	0	0	1	NA
AC001226.1	0.0702109	-0.000151928	0.001	0.003	1	NA
AC002044.1	0.00242965	0.00194714	0.002	0	1	NA
AC002056.2	0.114181	-0.000247702	0	0.001	1	NA
AC002057.1	0.693338	-0.00274653	0.066	0.066	1	NA
AC002057.2	0.000857248	-0.0220016	0.333	0.287	1	NA
AC002059.1	0.0575308	0.000436186	0.001	0	1	NA
AC002064.1	2.62690326226786e-06	0.00748912	0.014	0.005	0.083089	NA
AC002064.2	0.0010008	-0.00120798	0	0.003	1	NA
AC002066.1	5.0274685839467e-66	0.207663	0.731	0.48	1.59018831310234e-61	NA
AC002069.2	6.27049476596208e-07	0.0130743	0.014	0.004	0.0198336	NA
AC002070.1	4.93543376700676e-09	0.0235642	0.032	0.014	0.000156108	NA
AC002072.1	0.00041512	0.00903933	0.011	0.005	1	NA
AC002074.1	1.0064599479623e-05	0.00799048	0.005	0.001	0.318343	NA
AC002074.2	0.00722117	0.0029922	0.001	0	1	NA
AC002076.1	0.272957	0.000409812	0	0	1	NA
AC002091.1	0.120997	0.000519415	0	0	1	NA
AC002091.2	1	0	0	0	1	NA
AC002094.2	0.361881	-6.08118e-05	0	0	1	NA
AC002094.4	0.0251711	0.00339207	0.005	0.003	1	NA
AC002101.1	0.0321918	0.00147056	0.001	0	1	NA
AC002115.1	0.272957	0.000627377	0	0	1	NA
AC002116.2	0.000606069	0.0101181	0.015	0.008	1	NA
AC002128.1	0.117925	0.000877393	0.002	0.001	1	NA
AC002128.2	0.0681241	-0.000354105	0	0.001	1	NA
AC002306.1	1	0	0	0	1	NA
AC002310.1	0.078714	0.00101043	0.009	0.013	1	NA
AC002310.2	0.742587	0.00248581	0.008	0.007	1	NA
AC002331.1	3.40500385376729e-05	0.00424561	0.005	0.001	1	NA
AC002347.1	0.0282912	0.000554606	0.001	0	1	NA
AC002347.2	1	0	0	0	1	NA
AC002351.1	0.00722117	0.0016048	0.001	0	1	NA
AC002375.1	3.31364108198678e-05	0.00504684	0.004	0	1	NA
AC002377.1	0.837351	-0.00427932	0.014	0.014	1	NA
AC002378.1	0.00370924	0.00213684	0.002	0	1	NA
AC002383.1	0.0841494	0.000990979	0.002	0.001	1	NA
AC002398.1	0.114181	-0.000251514	0	0.001	1	NA
AC002398.2	0.376672	0.00194048	0.008	0.006	1	NA
AC002401.1	0.579484	0.000142795	0.002	0.002	1	NA
AC002401.2	0.540096	0.000321913	0.001	0.001	1	NA
AC002401.3	0.0575308	0.000488614	0.001	0	1	NA
AC002407.1	1	0	0	0	1	NA
AC002428.1	0.120997	0.00044763	0	0	1	NA
AC002429.2	1.78041925040913e-28	-0.0429497	0.071	0.145	5.63146608904407e-24	NA
AC002451.1	1.4956975519369e-35	0.066375	0.167	0.086	4.73089135677641e-31	NA
AC002454.1	3.49663877723506e-06	0.00684387	0.009	0.002	0.110599	NA
AC002456.1	0.000370719	0.00788855	0.017	0.009	1	NA
AC002458.1	0.0157952	-0.000512343	0	0.001	1	NA
AC002460.1	1	0	0	0	1	NA
AC002460.2	5.16032659155895e-55	0.211362	0.746	0.531	1.63221130091009e-50	NA
AC002463.1	2.66998122331396e-32	-0.0965673	0.118	0.205	8.44515060934207e-28	NA
AC002465.1	0.512319	0.000518913	0.001	0	1	NA
AC002465.2	0.0413869	-0.000353899	0	0.001	1	NA
AC002467.1	0.38361	0.000368765	0.002	0.003	1	NA
AC002470.1	0.185387	-0.00029045	0.001	0.002	1	NA
AC002472.1	1.52142458035868e-06	0.00675809	0.006	0	0.0481227	NA
AC002480.1	0.031107	-0.00402233	0.013	0.018	1	NA
AC002480.2	1.49429951575169e-06	0.00269072	0.047	0.028	0.0472647	NA
AC002511.1	0.0942753	-0.000728259	0.001	0.003	1	NA
AC002511.2	0.0268991	0.00231384	0.003	0.001	1	NA
AC002519.1	3.59727059297369e-09	0.00892809	0.022	0.008	0.000113782	NA
AC002542.6	0.0575308	0.000375401	0.001	0	1	NA
AC002546.1	0.663847	0.000987034	0.003	0.002	1	NA
AC002550.1	0.795976	0.000347584	0.001	0.001	1	NA
AC002550.2	1	0	0	0	1	NA
AC002551.1	0.378992	-0.00149929	0.002	0.001	1	NA
AC002553.1	0.663076	0.00112097	0.014	0.015	1	NA
AC002553.2	0.00485631	0.00330286	0.006	0.003	1	NA
AC002558.2	9.75574805746255e-07	-0.00235731	0	0.006	0.0308574	NA
AC002558.3	0.0120761	0.00891962	0.041	0.032	1	NA
AC003001.1	0.120997	0.00113771	0	0	1	NA
AC003005.2	0.0667238	0.00141118	0.004	0.002	1	NA
AC003035.1	0.0229542	0.00156277	0.004	0.002	1	NA
AC003035.2	0.361881	-0.00055044	0	0	1	NA
AC003043.1	0.00191944	0.00201439	0.002	0	1	NA
AC003043.2	0.120314	0.000228624	0.001	0	1	NA
AC003044.1	0.000112952	0.00615866	0.004	0.001	1	NA
AC003070.2	1	0	0	0	1	NA
AC003077.1	0.032114	0.000882584	0.001	0	1	NA
AC003084.1	1	0	0	0	1	NA
AC003086.1	0.623629	0.00038949	0.003	0.003	1	NA
AC003092.1	0.00722117	0.00181323	0.001	0	1	NA
AC003092.2	0.0575308	0.00112568	0.001	0	1	NA
AC003093.1	0.214569	5.52687192608521e-05	0.004	0.003	1	NA
AC003101.1	1.2183158010175e-09	0.00838098	0.016	0.004	3.85353287861835e-05	NA
AC003101.2	0.957184	-0.000461114	0.001	0.001	1	NA
AC003102.1	0.30628	-0.00127914	0.008	0.01	1	NA
AC003659.1	0.334653	-7.70772e-05	0.018	0.02	1	NA
AC003666.1	2.29260013356089e-06	0.0115797	0.018	0.007	0.0725149	NA
AC003681.1	0.159126	0.00330975	0.034	0.029	1	NA
AC003682.1	0.000494212	0.00865613	0.036	0.024	1	NA
AC003684.1	0.166874	0.00152192	0.001	0	1	NA
AC003685.1	1	0	0	0	1	NA
AC003688.2	0.0681241	-0.000399583	0	0.001	1	NA
AC003950.1	0.0282912	0.00110648	0.001	0	1	NA
AC003956.1	0.014594	-0.00184474	0.002	0.005	1	NA
AC003958.2	0.854024	-0.000213548	0	0	1	NA
AC003965.1	0.288844	-0.000351302	0.001	0.002	1	NA
AC003965.2	1	0	0	0	1	NA
AC003973.1	0.0660912	0.00181139	0.004	0.002	1	NA
AC003982.1	0.00461016	0.00182838	0.002	0	1	NA
AC003984.1	0.092661	0.00226691	0.001	0	1	NA
AC003986.1	1	0	0	0	1	NA
AC003986.2	1	0	0	0	1	NA
AC003986.3	1	0	0	0	1	NA
AC003988.1	1.13661211047904e-05	0.00598874	0.004	0	0.35951	NA
AC003991.1	0.000222337	0.00714723	0.013	0.006	1	NA
AC003991.2	1	0	0	0	1	NA
AC003992.1	0.808602	0.000550691	0	0.001	1	NA
AC004000.1	1	0	0	0	1	NA
AC004009.1	0.00461211	0.00218429	0.002	0	1	NA
AC004012.1	1	0	0	0	1	NA
AC004014.1	0.000522403	0.00283718	0.002	0	1	NA
AC004034.1	0.00792705	-0.00107876	0.008	0.014	1	NA
AC004039.1	2.42282236274908e-22	-0.0129799	0.014	0.051	7.66338713337535e-18	NA
AC004047.1	0.272957	0.000294164	0	0	1	NA
AC004052.1	7.68454162351276e-08	0.0110053	0.009	0.001	0.00243062	NA
AC004053.1	0.386434	0.0142088	0.029	0.027	1	NA
AC004054.1	0.00109852	-0.00199387	0.007	0.013	1	NA
AC004066.2	0.0575308	0.00120647	0.001	0	1	NA
AC004067.1	1	0	0	0	1	NA
AC004069.1	0.678979	0.00019573	0.002	0.002	1	NA
AC004076.2	0.757635	-0.0003553	0.007	0.008	1	NA
AC004083.1	1.15756888338793e-06	0.0241959	0.054	0.034	0.0366139	NA
AC004112.1	0.000351029	0.000319503	0.011	0.02	1	NA
AC004130.2	0.371296	0.000337896	0	0.001	1	NA
AC004148.1	0.646177	0.00113197	0.004	0.005	1	NA
AC004156.1	0.00132445	0.00236049	0.003	0	1	NA
AC004158.1	6.283232926892e-08	0.011378	0.012	0.003	0.00198739	NA
AC004160.1	4.84465088393057e-14	0.0261676	0.027	0.007	1.53236307458724e-09	NA
AC004160.2	1	0	0	0	1	NA
AC004217.1	0.00063854	-0.00121706	0	0.003	1	NA
AC004221.1	1	0	0	0	1	NA
AC004223.2	1	0	0	0	1	NA
AC004223.4	0.272957	0.000655811	0	0	1	NA
AC004231.1	0.0102778	0.00319996	0.006	0.002	1	NA
AC004231.3	0.207219	0.0018017	0.004	0.002	1	NA
AC004232.1	1.77167401583988e-07	-0.0032182	0	0.008	0.0056038	NA
AC004233.1	0.0193809	-0.000591808	0.002	0.005	1	NA
AC004233.2	0.00163208	0.0065682	0.013	0.006	1	NA
AC004233.3	0.0133428	0.000289425	0.003	0.001	1	NA
AC004241.1	3.11395037151306e-05	-0.00178795	0.021	0.036	0.984943	NA
AC004241.2	1	0	0	0	1	NA
AC004241.3	0.00722117	0.000947789	0.001	0	1	NA
AC004241.4	1	0	0	0	1	NA
AC004253.1	2.65393377421403e-09	-0.00618037	0.012	0.03	8.39439252783897e-05	NA
AC004257.1	0.234553	0.00120776	0.001	0	1	NA
AC004263.1	0.0282912	0.000463485	0.001	0	1	NA
AC004263.2	0.450008	0.00129646	0.005	0.006	1	NA
AC004264.1	1	0	0	0	1	NA
AC004381.1	9.83620084226769e-05	0.00569309	0.007	0.002	1	NA
AC004448.2	0.00577188	0.00572526	0.013	0.008	1	NA
AC004448.3	1	0	0	0	1	NA
AC004461.2	0.0632909	0.000762876	0.009	0.006	1	NA
AC004464.1	0.120997	0.00049227	0	0	1	NA
AC004466.1	0.821191	5.4073346395408e-05	0.001	0.001	1	NA
AC004466.2	0.0282912	0.00107662	0.001	0	1	NA
AC004466.3	0.361881	-0.000153224	0	0	1	NA
AC004470.1	0.0620133	0.00153759	0.001	0	1	NA
AC004471.1	0.289728	0.00109237	0.004	0.003	1	NA
AC004471.2	0.0141965	0.000770675	0.001	0	1	NA
AC004477.1	0.356236	0.00108103	0.007	0.009	1	NA
AC004477.3	0.120997	0.000356737	0	0	1	NA
AC004485.1	0.000369502	0.00484447	0.004	0.001	1	NA
AC004490.1	0.0927488	0.000385366	0.001	0	1	NA
AC004492.1	0.0241184	0.0029859	0.007	0.004	1	NA
AC004494.1	9.64485370787523e-19	0.0262405	0.052	0.019	3.05066722780094e-14	NA
AC004522.3	0.00394496	0.00391143	0.003	0.001	1	NA
AC004522.4	0.0167787	0.00089836	0.002	0	1	NA
AC004522.5	0.127901	0.00369063	0.003	0.002	1	NA
AC004528.1	0.864278	-0.00109695	0.002	0.002	1	NA
AC004528.2	0.793797	0.000240738	0.001	0.001	1	NA
AC004540.1	0.267505	0.00390459	0.014	0.011	1	NA
AC004540.2	1	0	0	0	1	NA
AC004542.1	1	0	0	0	1	NA
AC004542.2	0.627888	-9.38684e-05	0.002	0.002	1	NA
AC004549.1	1	0	0	0	1	NA
AC004551.1	0.000126064	0.0071373	0.007	0.002	1	NA
AC004554.2	0.0113619	0.00557312	0.006	0.003	1	NA
AC004556.3	0.0151988	0.00165673	0.002	0	1	NA
AC004584.1	0.162511	-0.000296982	0	0.001	1	NA
AC004584.3	4.3798473677526e-05	0.00859525	0.034	0.021	1	NA
AC004585.1	1	0	0	0	1	NA
AC004590.1	0.120997	0.00118963	0	0	1	NA
AC004593.1	1.60486482744285e-25	-0.0225174	0.018	0.062	5.07618744920174e-21	NA
AC004593.2	0.00509548	0.00166677	0.009	0.004	1	NA
AC004593.3	0.0637555	-3.72181e-05	0.017	0.022	1	NA
AC004594.1	3.90514256357002e-16	-0.0168143	0.022	0.055	1.2351965928572e-11	NA
AC004596.1	0.128548	0.00268093	0.006	0.004	1	NA
AC004597.1	1	0	0	0	1	NA
AC004637.1	1	0	0	0	1	NA
AC004672.1	0.00955433	-0.000798745	0.002	0.006	1	NA
AC004672.2	0.000388027	0.00208731	0.004	0	1	NA
AC004674.1	1	0	0	0	1	NA
AC004687.1	1	0	0	0	1	NA
AC004690.2	0.00128162	0.00369077	0.003	0	1	NA
AC004691.1	0.0575308	0.000441935	0.001	0	1	NA
AC004702.1	0.11783	0.0013962	0.002	0.001	1	NA
AC004704.1	0.844758	-0.00673766	0.042	0.041	1	NA
AC004706.1	1	0	0	0	1	NA
AC004706.3	0.00772997	0.00238926	0.004	0.001	1	NA
AC004765.1	0.100023	-0.000285855	0.002	0.004	1	NA
AC004771.1	0.330909	0.000443269	0.001	0.001	1	NA
AC004771.2	0.255429	0.00157388	0.002	0.001	1	NA
AC004771.3	0.0697796	-0.000372964	0	0.002	1	NA
AC004771.4	0.0807166	-0.000405656	0.002	0.004	1	NA
AC004771.5	0.511827	0.000357012	0.001	0	1	NA
AC004784.1	1.81616197155989e-07	0.0110304	0.01	0.002	0.00574452	NA
AC004797.1	2.50759853927385e-13	-0.00952759	0.029	0.062	7.9315341797232e-09	NA
AC004801.3	0.0509798	0.000385572	0.003	0.005	1	NA
AC004801.4	0.046938	-0.000413599	0.001	0.003	1	NA
AC004801.5	0.0575308	0.000421749	0.001	0	1	NA
AC004801.6	1	0	0	0	1	NA
AC004803.1	2.16885783961531e-06	0.0179943	0.036	0.02	0.068601	NA
AC004812.2	4.81551078650543e-05	-0.00356492	0.009	0.019	1	NA
AC004816.1	0.128766	0.00267041	0.006	0.004	1	NA
AC004816.2	1	0	0	0	1	NA
AC004817.3	0.120314	0.000107509	0.001	0	1	NA
AC004817.5	4.79496788454047e-09	0.0181261	0.021	0.007	0.000151665	NA
AC004825.2	0.532583	0.000321714	0.001	0.001	1	NA
AC004825.3	0.000309844	0.000527282	0.008	0.016	1	NA
AC004828.1	4.2712479466352e-05	0.00849798	0.031	0.018	1	NA
AC004828.2	0.0797378	-0.0014597	0.028	0.034	1	NA
AC004830.2	4.7012940191718e-07	0.0126435	0.014	0.004	0.0148702	NA
AC004832.1	0.0152636	0.00205253	0.002	0	1	NA
AC004832.4	0.0694963	0.00137194	0.003	0.001	1	NA
AC004832.5	0.0141965	0.000942646	0.001	0	1	NA
AC004832.6	1	0	0	0	1	NA
AC004834.1	2.26085354369329e-22	0.0292846	0.066	0.025	7.15107975870187e-18	NA
AC004835.1	0.000191026	0.00632601	0.003	0	1	NA
AC004837.2	1.50168700280559e-06	-0.00256857	0	0.006	0.0474984	NA
AC004837.4	0.0114918	-0.00236338	0.014	0.021	1	NA
AC004839.2	2.85820307975991e-21	-0.0119105	0.002	0.027	9.04049634128059e-17	NA
AC004846.1	0.0688721	0.000742126	0.002	0.001	1	NA
AC004846.2	0.120997	0.000271006	0	0	1	NA
AC004847.1	1	0	0	0	1	NA
AC004852.2	4.77676347221723e-08	0.00822938	0.008	0.001	0.00151089	NA
AC004854.2	0.523481	0.00188792	0.011	0.01	1	NA
AC004862.1	1.79944948261579e-09	0.00994785	0.007	0	5.69165871351374e-05	NA
AC004865.2	0.00392895	0.00237035	0.003	0.001	1	NA
AC004870.2	0.00329339	0.00340205	0.004	0.001	1	NA
AC004870.3	0.0164814	0.003138	0.004	0.001	1	NA
AC004870.4	1.31068819724989e-21	0.0192566	0.025	0.003	4.14570676790141e-17	NA
AC004875.1	0.0087741	0.00259357	0.002	0	1	NA
AC004877.1	0.353252	0.000680479	0.001	0.001	1	NA
AC004879.1	3.05810076451913e-07	0.062006	0.698	0.522	0.00967277	NA
AC004882.1	1	0	0	0	1	NA
AC004882.3	0.10129	0.000301695	0.001	0.002	1	NA
AC004884.2	0.00493015	-0.002446	0.002	0.006	1	NA
AC004889.1	0.000346812	-0.00802017	0.009	0.018	1	NA
AC004893.3	0.0839158	0.00154783	0.002	0.001	1	NA
AC004895.1	0.205684	0.00315624	0.004	0.002	1	NA
AC004900.1	1	0	0	0	1	NA
AC004906.1	0.120997	0.00102868	0	0	1	NA
AC004908.1	0.179007	0.000429007	0.002	0.003	1	NA
AC004908.2	1.13889780945755e-11	-0.00666053	0.004	0.02	3.60233377131422e-07	NA
AC004908.3	0.382022	0.0011564	0.004	0.003	1	NA
AC004917.1	8.16870337491842e-27	0.0372168	0.052	0.013	2.5837608774867e-22	NA
AC004918.1	0.00302071	0.00779381	0.027	0.018	1	NA
AC004918.4	0.869649	0.000565064	0.006	0.006	1	NA
AC004921.1	0.0413869	-0.000392871	0	0.001	1	NA
AC004921.2	0.499443	0.00110327	0.003	0.003	1	NA
AC004923.4	0.386569	0.00172199	0.003	0.002	1	NA
AC004930.1	0.272957	0.000587451	0	0	1	NA
AC004936.1	3.35934745471545e-11	0.0129532	0.009	0	1.0625615999265e-06	NA
AC004938.2	0.524923	0.000747648	0.002	0.002	1	NA
AC004941.1	1	0	0	0	1	NA
AC004943.1	0.179955	0.00122507	0.003	0.001	1	NA
AC004943.2	9.53503867701806e-22	0.0410264	0.088	0.041	3.01593273354081e-17	NA
AC004943.3	1	0	0	0	1	NA
AC004946.1	0.00242655	0.00333205	0.002	0	1	NA
AC004946.2	0.674342	-0.000604081	0	0	1	NA
AC004947.1	0.0575308	0.0013371	0.001	0	1	NA
AC004947.3	0.120997	0.000562337	0	0	1	NA
AC004949.1	0.158325	0.00552377	0.026	0.031	1	NA
AC004951.1	2.37753952689981e-101	0.125683	0.347	0.145	7.52015752358409e-97	NA
AC004969.1	2.65759026708268e-12	-0.00597346	0.003	0.018	8.4059580147825e-08	NA
AC004973.1	0.0604372	0.00190496	0.003	0.001	1	NA
AC004974.1	0.412403	-0.00022455	0	0.001	1	NA
AC004982.1	0.0016204	0.00406234	0.011	0.005	1	NA
AC004982.2	0.0181035	-0.00524639	0.029	0.038	1	NA
AC004988.1	0.0391303	-0.00278648	0.005	0.009	1	NA
AC004990.1	0.272957	0.000676157	0	0	1	NA
AC004994.1	0.227315	-0.000242572	0.001	0.002	1	NA
AC005005.3	0.272957	9.47242385496314e-05	0	0	1	NA
AC005005.4	1.38752896307917e-05	0.00591443	0.01	0.003	0.438875	NA
AC005006.1	0.542103	0.00132794	0.001	0.001	1	NA
AC005008.2	0.000522403	0.00390603	0.002	0	1	NA
AC005009.2	1.89040594548102e-10	0.00935672	0.013	0.002	5.97935400555647e-06	NA
AC005013.1	0.272957	0.000134311	0	0	1	NA
AC005014.2	0.367205	0.00153611	0.002	0.001	1	NA
AC005014.4	6.39378645933462e-18	-0.00993427	0.004	0.026	2.02235465708754e-13	NA
AC005019.2	0.120997	0.000640909	0	0	1	NA
AC005021.1	1	0	0	0	1	NA
AC005034.2	0.272957	0.000244906	0	0	1	NA
AC005034.4	0.13859	0.00107035	0.002	0.001	1	NA
AC005034.5	0.0979667	0.000829928	0.004	0.002	1	NA
AC005034.6	0.822509	0.00288343	0.022	0.021	1	NA
AC005037.1	7.63342066220018e-212	0.370184	0.508	0.221	2.41445095545392e-207	NA
AC005040.2	0.00244551	0.00325576	0.003	0	1	NA
AC005041.4	1	0	0	0	1	NA
AC005041.5	2.82149186451363e-07	-0.00745945	0.016	0.033	0.00892438	NA
AC005042.2	5.87649579669948e-05	0.00597049	0.005	0.001	1	NA
AC005046.1	0.422157	0.00024762	0.004	0.006	1	NA
AC005050.1	0.546472	0.000881145	0.007	0.006	1	NA
AC005050.2	1	0	0	0	1	NA
AC005050.3	6.19153289076937e-06	0.00697724	0.008	0.002	0.195838	NA
AC005052.2	0.000187411	0.0123959	0.052	0.037	1	NA
AC005062.1	1.25340670438017e-09	0.0114046	0.013	0.003	3.96452540595447e-05	NA
AC005064.1	5.90965214376719e-08	-0.00565181	0.006	0.019	0.00186922	NA
AC005070.3	3.62667588560966e-06	-0.00379422	0.004	0.014	0.114712	NA
AC005071.1	0.0928075	-0.000113126	0.001	0	1	NA
AC005072.1	1.01119433344957e-22	0.0335595	0.076	0.031	3.19840767670098e-18	NA
AC005076.1	0.000167606	-0.00165879	0	0.003	1	NA
AC005081.1	0.0623967	-0.000623413	0.005	0.008	1	NA
AC005082.1	0.0413869	-0.000366752	0	0.001	1	NA
AC005082.2	0.485112	0.000782235	0.004	0.003	1	NA
AC005086.2	0.197161	-0.000136807	0	0	1	NA
AC005089.1	0.112165	0.000400577	0.004	0.003	1	NA
AC005091.1	0.00981477	0.00534614	0.019	0.012	1	NA
AC005096.1	0.489491	0.00165786	0.004	0.003	1	NA
AC005100.1	0.00191944	0.00337579	0.002	0	1	NA
AC005100.2	3.20358597222692e-05	0.00712213	0.005	0.001	1	NA
AC005104.3	0.0116139	-3.12244e-05	0.003	0.006	1	NA
AC005144.1	0.00122615	0.00524227	0.005	0.001	1	NA
AC005153.1	0.00841596	0.00398476	0.008	0.004	1	NA
AC005154.3	1	0	0	0	1	NA
AC005154.4	0.987254	0.00483804	0.016	0.016	1	NA
AC005162.1	0.000273853	-0.00192742	0.001	0.005	1	NA
AC005162.2	1	0	0	0	1	NA
AC005162.3	3.25466699548378e-15	-0.0123771	0.016	0.046	1.02945117067152e-10	NA
AC005165.1	0.503128	0.00646717	0.006	0.005	1	NA
AC005165.3	0.120997	0.00106605	0	0	1	NA
AC005180.1	3.96820717495174e-05	0.00809344	0.015	0.006	1	NA
AC005180.2	0.0193547	-0.000186154	0.002	0.005	1	NA
AC005197.1	1	0	0	0	1	NA
AC005208.1	0.000408584	0.0071199	0.009	0.003	1	NA
AC005209.1	0.272957	0.000495515	0	0	1	NA
AC005220.1	0.157413	-0.000211466	0	0.001	1	NA
AC005224.2	4.0650822777699e-07	-0.015946	0.076	0.049	0.0128579	NA
AC005224.3	4.50710799817582e-05	0.00331033	0.009	0.003	1	NA
AC005225.1	0.114181	-0.000259821	0	0.001	1	NA
AC005225.2	6.02596692025058e-60	0.112005	0.313	0.168	1.90601333687526e-55	NA
AC005225.3	4.53671204504188e-11	0.0146162	0.056	0.029	1.43496201984675e-06	NA
AC005229.4	0.197161	-0.000171691	0	0	1	NA
AC005229.5	0.00712398	0.00228408	0.003	0.001	1	NA
AC005234.1	0.272957	0.000705704	0	0	1	NA
AC005234.2	0.0141965	0.00255862	0.001	0	1	NA
AC005237.1	0.0340468	-0.000938146	0.036	0.045	1	NA
AC005244.2	0.0282912	0.00168105	0.001	0	1	NA
AC005252.4	0.385801	0.00411158	0.003	0.002	1	NA
AC005253.1	1.35596069156871e-06	-0.00398705	0.003	0.011	0.042889	NA
AC005253.2	1	0	0	0	1	NA
AC005261.1	1.30204851355971e-44	0.0852455	0.246	0.14	4.11837944838937e-40	NA
AC005261.2	0.853355	0.000660605	0	0	1	NA
AC005264.1	0.120997	0.00111587	0	0	1	NA
AC005277.1	1	0	0	0	1	NA
AC005277.2	1	0	0	0	1	NA
AC005280.1	0.000367892	0.00488821	0.004	0.001	1	NA
AC005280.2	0.00370924	0.00249459	0.002	0	1	NA
AC005288.1	0.000657927	-0.00124091	0.004	0.011	1	NA
AC005291.1	0.256767	-0.000534867	0.002	0.001	1	NA
AC005291.2	0.000305609	-0.00176837	0.003	0.009	1	NA
AC005293.1	0.379791	0.00334887	0.012	0.01	1	NA
AC005301.2	0.120997	0.00128752	0	0	1	NA
AC005304.1	1	0	0	0	1	NA
AC005304.2	1	0	0	0	1	NA
AC005304.3	1	0	0	0	1	NA
AC005306.1	0.0024195	0.00536692	0.008	0.004	1	NA
AC005307.1	0.0282912	0.00150386	0.001	0	1	NA
AC005323.1	0.00453248	0.00363335	0.004	0.001	1	NA
AC005323.2	6.06567855863232e-05	0.00787601	0.008	0.002	1	NA
AC005324.1	0.0575308	0.00176236	0.001	0	1	NA
AC005324.5	0.253938	-0.000141836	0	0.001	1	NA
AC005329.1	0.394801	-0.000636059	0.004	0.005	1	NA
AC005329.2	1	0	0	0	1	NA
AC005329.3	0.0927062	-0.000637103	0.004	0.002	1	NA
AC005332.1	0.609939	0.000442335	0.004	0.003	1	NA
AC005332.2	0.00311858	0.00202079	0.006	0.002	1	NA
AC005332.3	0.00357908	-0.00105867	0.018	0.028	1	NA
AC005332.4	0.00023002	-0.00520038	0.028	0.042	1	NA
AC005332.5	9.34806503672252e-17	0.0149075	0.027	0.006	2.95679297111533e-12	NA
AC005332.6	6.46072294064323e-26	0.0407818	0.085	0.035	2.04352666612546e-21	NA
AC005332.7	0.29519	0.000915015	0.001	0	1	NA
AC005339.1	0.0141965	0.00125661	0.001	0	1	NA
AC005342.1	0.670691	-0.00309253	0.124	0.124	1	NA
AC005342.2	1	0	0	0	1	NA
AC005343.1	0.802491	0.00228263	0.004	0.004	1	NA
AC005343.4	0.120997	0.00122985	0	0	1	NA
AC005344.1	0.00722117	0.000877806	0.001	0	1	NA
AC005355.1	1.92799875415529e-109	0.149188	0.22	0.067	6.09826005939317e-105	NA
AC005358.1	2.30596074556161e-33	-0.0765224	0.077	0.158	7.29375383821138e-29	NA
AC005358.2	0.0282441	1.56031934996012e-05	0.01	0.015	1	NA
AC005363.2	8.66862020748875e-10	-0.00413117	0	0.009	2.74188457162869e-05	NA
AC005381.1	0.000338179	0.00231642	0.004	0.001	1	NA
AC005383.1	1	0	0	0	1	NA
AC005387.2	0.381923	0.00187323	0.002	0.001	1	NA
AC005392.2	1	0	0	0	1	NA
AC005392.3	0.234553	0.000983466	0.001	0	1	NA
AC005393.1	0.0029312	0.00315495	0.007	0.003	1	NA
AC005394.1	3.92458073328176e-10	0.0126184	0.019	0.005	1.24134488593702e-05	NA
AC005400.1	1.38734330277967e-10	-0.124093	0.214	0.247	4.3881668666921e-06	NA
AC005410.2	0.853787	0.00320167	0.01	0.01	1	NA
AC005414.1	2.76512482027042e-17	-0.0262558	0.033	0.073	8.74608980651533e-13	NA
AC005476.2	0.0147415	0.00419197	0.007	0.003	1	NA
AC005479.1	0.0098683	-0.000672651	0	0.002	1	NA
AC005479.2	0.53231	6.18215628320571e-05	0.002	0.002	1	NA
AC005480.1	0.0271387	-0.0026306	0.07	0.084	1	NA
AC005481.1	1	0	0	0	1	NA
AC005482.1	0.0575308	0.00130936	0.001	0	1	NA
AC005486.1	0.109876	0.00617685	0.014	0.011	1	NA
AC005487.1	7.83105248801098e-06	0.00755709	0.011	0.004	0.247696	NA
AC005495.2	0.0098683	-0.000850487	0	0.002	1	NA
AC005498.1	0.0282912	0.00057693	0.001	0	1	NA
AC005498.2	0.149535	-0.000328268	0.002	0.003	1	NA
AC005498.3	2.71770136636469e-10	0.025451	0.081	0.051	8.59608942181151e-06	NA
AC005519.1	0.0862437	-0.00121545	0.005	0.008	1	NA
AC005520.2	0.000126637	0.0177314	0.075	0.057	1	NA
AC005520.3	0.288071	0.00205667	0.004	0.003	1	NA
AC005520.5	8.0675973656892e-38	-0.0311775	0.017	0.074	2.55178104676749e-33	NA
AC005522.1	0.0244875	-0.000812942	0	0.002	1	NA
AC005523.1	0.825187	0.000276797	0.005	0.005	1	NA
AC005523.2	5.02035899004931e-15	-0.00958919	0.005	0.026	1.5879395485526e-10	NA
AC005529.1	0.120997	0.00023204	0	0	1	NA
AC005532.1	3.76375684117072e-13	0.012083	0.036	0.013	1.1904762888623e-08	NA
AC005534.1	0.0172597	0.00143574	0.003	0.001	1	NA
AC005537.1	9.32542070718227e-10	0.0154527	0.014	0.003	2.94963056968175e-05	NA
AC005538.1	0.120997	0.00108854	0	0	1	NA
AC005540.1	0.0141965	0.00141507	0.001	0	1	NA
AC005546.1	0.0174305	0.0019643	0.003	0.001	1	NA
AC005548.1	0.0223553	0.00252895	0.002	0.001	1	NA
AC005550.1	1	0	0	0	1	NA
AC005550.2	0.821055	0.000691777	0.001	0.001	1	NA
AC005562.1	3.60402619881339e-24	0.059529	0.207	0.134	1.13995348668468e-19	NA
AC005580.1	0.00397715	0.00237327	0.003	0.001	1	NA
AC005586.1	0.237658	-0.000176591	0.003	0.004	1	NA
AC005586.2	6.13106354309144e-05	0.00239062	0.004	0	1	NA
AC005592.1	1	0	0	0	1	NA
AC005594.1	0.361881	-0.000463531	0	0	1	NA
AC005597.1	0.0244961	-0.000390975	0	0.002	1	NA
AC005599.1	0.000408787	0.00626251	0.011	0.005	1	NA
AC005606.1	1	0	0	0	1	NA
AC005606.2	0.0141965	0.000984605	0.001	0	1	NA
AC005609.1	1	0	0	0	1	NA
AC005609.5	0.120997	0.000360817	0	0	1	NA
AC005614.1	0.00370924	0.00216334	0.002	0	1	NA
AC005616.1	0.062062	0.000689687	0.001	0	1	NA
AC005618.1	0.00133344	-0.00348891	0.034	0.048	1	NA
AC005618.2	0.0575308	0.000620403	0.001	0	1	NA
AC005618.3	0.0575308	0.000538502	0.001	0	1	NA
AC005618.4	0.0879712	0.00731897	0.022	0.018	1	NA
AC005632.3	0.0391087	0.00394988	0.016	0.011	1	NA
AC005632.5	0.00722117	0.00183766	0.001	0	1	NA
AC005632.6	0.00180729	0.0018495	0.01	0.004	1	NA
AC005670.1	0.0542036	-0.000576321	0.002	0.004	1	NA
AC005670.3	3.70999593438509e-90	0.153895	0.433	0.242	1.173471714046e-85	NA
AC005674.1	0.120997	0.00106906	0	0	1	NA
AC005674.2	9.86098788756471e-05	0.0109174	0.033	0.02	1	NA
AC005682.2	0.00354242	0.00370007	0.004	0.001	1	NA
AC005692.1	0.0467833	-0.000719254	0.001	0.003	1	NA
AC005692.2	0.835786	0.000794966	0.002	0.002	1	NA
AC005692.3	0.0220793	-0.0100324	0.027	0.036	1	NA
AC005695.1	0.614789	-0.000633649	0.001	0.002	1	NA
AC005695.2	3.71293595839113e-10	-0.00972758	0.014	0.034	1.17440164363911e-05	NA
AC005695.3	0.000274214	0.00209951	0.003	0	1	NA
AC005696.1	2.5498328453677e-13	-0.0105908	0.013	0.037	8.06512128989805e-09	NA
AC005696.2	0.793332	0.000621438	0.001	0.001	1	NA
AC005696.3	0.272957	0.000384283	0	0	1	NA
AC005696.4	0.055936	0.00139198	0.004	0.002	1	NA
AC005697.2	0.0212409	-2.31082e-06	0.003	0.006	1	NA
AC005699.1	0.203979	0.0123182	0.064	0.058	1	NA
AC005703.1	0.272957	0.000229819	0	0	1	NA
AC005703.2	0.117719	-0.00254213	0.004	0.006	1	NA
AC005703.3	0.837096	0.000815527	0.002	0.002	1	NA
AC005703.4	9.94444144729436e-06	0.00474749	0.011	0.003	0.314543	NA
AC005703.7	0.572091	0.000130489	0.007	0.009	1	NA
AC005722.3	0.0141965	0.00156487	0.001	0	1	NA
AC005725.1	1	0	0	0	1	NA
AC005726.1	2.15612090377386e-13	0.0259236	0.057	0.027	6.81981041863673e-09	NA
AC005726.2	0.0575308	0.000539113	0.001	0	1	NA
AC005726.3	0.530205	0.00108669	0.002	0.002	1	NA
AC005726.4	0.0575308	0.000596451	0.001	0	1	NA
AC005726.5	6.38928243244776e-15	-0.00886902	0.003	0.021	2.02093003338323e-10	NA
AC005730.2	1	0	0	0	1	NA
AC005730.3	0.421257	5.62358844078909e-05	0.003	0.004	1	NA
AC005736.1	0.00165456	0.00446	0.01	0.004	1	NA
AC005736.2	0.272957	0.000580105	0	0	1	NA
AC005740.3	4.63615321251414e-05	-0.0184097	0.022	0.037	1	NA
AC005740.4	1	0	0	0	1	NA
AC005740.5	0.074743	0.00266494	0.004	0.002	1	NA
AC005746.1	0.0152853	0.000772468	0.002	0	1	NA
AC005746.2	0.000142486	-0.00337689	0.011	0.021	1	NA
AC005753.1	0.272957	0.000194193	0	0	1	NA
AC005753.2	0.0132917	0.00114146	0.003	0.001	1	NA
AC005753.3	1	0	0	0	1	NA
AC005757.1	1	0	0	0	1	NA
AC005759.1	0.156508	0.0113085	0.029	0.025	1	NA
AC005772.1	0.0985022	-0.000247404	0.002	0.001	1	NA
AC005772.2	0.661399	0.00299906	0.008	0.007	1	NA
AC005774.2	0.0681241	-0.000352518	0	0.001	1	NA
AC005775.1	0.00748798	0.00226188	0.006	0.003	1	NA
AC005776.2	0.853355	0.000581104	0	0	1	NA
AC005785.1	0.46729	-0.00010287	0.001	0.001	1	NA
AC005786.2	1	0	0	0	1	NA
AC005786.3	6.56803752320721e-07	0.0105942	0.017	0.006	0.0207747	NA
AC005803.1	0.120997	0.000207836	0	0	1	NA
AC005808.1	0.000104032	0.00518531	0.005	0.001	1	NA
AC005821.1	2.82473060711795e-07	0.00852859	0.007	0.001	0.00893462	NA
AC005828.1	0.694747	0.00119454	0.002	0.002	1	NA
AC005828.3	0.459585	0.000520837	0	0	1	NA
AC005832.1	0.793216	0.00104512	0.001	0.001	1	NA
AC005833.2	0.754828	-0.000192102	0.003	0.003	1	NA
AC005837.1	8.00046255644446e-09	-0.00598342	0.003	0.014	0.000253055	NA
AC005837.4	8.05670297350681e-07	0.00865443	0.014	0.004	0.0254834	NA
AC005838.2	0.350337	-0.00155588	0.011	0.013	1	NA
AC005840.2	2.42646854694566e-08	0.00787262	0.014	0.003	0.000767492	NA
AC005840.4	0.382737	0.000971396	0.002	0.001	1	NA
AC005841.1	0.000999033	0.00157471	0.002	0	1	NA
AC005842.1	0.0136238	0.00510085	0.006	0.003	1	NA
AC005845.1	0.272957	0.000179504	0	0	1	NA
AC005856.1	0.00231135	-0.00514277	0.009	0.016	1	NA
AC005863.1	0.0575308	0.000723138	0.001	0	1	NA
AC005865.2	1.48065690412097e-08	0.0316455	0.058	0.034	0.000468332	NA
AC005871.2	0.0660427	0.00357376	0.004	0.002	1	NA
AC005884.1	0.0169862	0.000640305	0.012	0.019	1	NA
AC005888.1	1	0	0	0	1	NA
AC005899.1	2.46142628698887e-25	0.0291159	0.073	0.027	7.78549134574581e-21	NA
AC005899.3	0.197161	-0.000123119	0	0	1	NA
AC005899.5	2.52215806262234e-69	0.0745165	0.16	0.049	7.97758595207445e-65	NA
AC005899.6	1.29475937738037e-09	0.0168496	0.055	0.03	4.0953239106541e-05	NA
AC005899.7	9.60277920615682e-09	0.0110682	0.052	0.029	0.000303736	NA
AC005899.8	0.0255116	0.00246423	0.029	0.037	1	NA
AC005906.2	8.01907183136032e-08	0.00985577	0.007	0.001	0.00253643	NA
AC005906.3	0.412524	0.000104129	0	0.001	1	NA
AC005908.3	0.120997	0.000840332	0	0	1	NA
AC005909.1	0.120997	0.000835967	0	0	1	NA
AC005909.2	1.34335872344626e-05	0.0107524	0.01	0.003	0.424904	NA
AC005911.1	1	0	0	0	1	NA
AC005912.2	4.48715179240002e-05	0.00468568	0.006	0.001	1	NA
AC005914.1	0.795077	-0.000909192	0.001	0.001	1	NA
AC005920.1	0.010316	0.00549745	0.008	0.004	1	NA
AC005920.2	3.00397132152891e-10	-0.0110441	0.033	0.061	9.50156128999593e-06	NA
AC005920.3	0.0441289	0.00238438	0.004	0.002	1	NA
AC005920.4	1	0	0	0	1	NA
AC005921.2	2.68781099021842e-45	-0.0262506	0.001	0.049	8.50154616206086e-41	NA
AC005921.4	7.62423916342945e-05	0.00297196	0.003	0	1	NA
AC005944.1	0.0126941	0.000472504	0.004	0.007	1	NA
AC005954.1	0.0282912	0.00096247	0.001	0	1	NA
AC005954.2	0.820784	0.000749633	0.001	0.001	1	NA
AC005962.1	0.14528	0.000372708	0.001	0.002	1	NA
AC005962.2	0.0413869	-0.000517635	0	0.001	1	NA
AC005972.3	6.03630797040966e-05	0.00597147	0.007	0.002	1	NA
AC005993.1	0.00778499	0.0032834	0.004	0.001	1	NA
AC005996.1	1	0	0	0	1	NA
AC005998.1	0.234637	0.000926653	0.001	0	1	NA
AC005999.2	1.48410970019284e-09	0.0106063	0.017	0.004	4.69423898170996e-05	NA
AC006001.2	4.90677319411066e-105	0.140277	0.371	0.169	1.5520123612972e-100	NA
AC006004.1	0.00242862	0.00193164	0.002	0	1	NA
AC006007.1	0.674702	0.0005755	0	0	1	NA
AC006008.1	0.00163332	0.00282719	0.008	0.004	1	NA
AC006013.1	0.0045143	0.00173442	0.003	0	1	NA
AC006017.1	0.202327	0.000860004	0.003	0.002	1	NA
AC006019.1	1	0	0	0	1	NA
AC006019.3	0.120997	0.00125685	0	0	1	NA
AC006027.1	0.197161	-0.000196817	0	0	1	NA
AC006033.2	1	0	0	0	1	NA
AC006040.1	0.120997	0.000554172	0	0	1	NA
AC006041.1	0.00722117	0.000908979	0.001	0	1	NA
AC006041.2	2.05289728692538e-23	0.0236243	0.043	0.01	6.49331411854497e-19	NA
AC006042.1	0.091561	0.00149533	0.004	0.002	1	NA
AC006042.2	2.6764916513233e-09	-0.00629754	0.006	0.021	8.46574309313561e-05	NA
AC006042.4	0.512073	0.000330699	0.001	0	1	NA
AC006043.1	0.0131538	0.00174165	0.003	0.001	1	NA
AC006058.1	1	0	0	0	1	NA
AC006059.1	0.299773	-0.0113844	0.181	0.176	1	NA
AC006059.4	0.0151974	-0.000281592	0.002	0.004	1	NA
AC006059.5	0.37727	0.00207731	0.009	0.011	1	NA
AC006062.1	0.0045143	0.00116174	0.003	0	1	NA
AC006063.3	0.0141965	0.00296725	0.001	0	1	NA
AC006064.1	0.497722	0.0012537	0.003	0.003	1	NA
AC006064.2	2.45813521328182e-17	-0.01232	0.008	0.033	7.7750816796104e-13	NA
AC006064.3	0.00230057	0.00447403	0.007	0.003	1	NA
AC006064.4	0.144855	-0.000769485	0.001	0.002	1	NA
AC006064.5	0.120178	0.00275237	0.005	0.003	1	NA
AC006065.4	0.361881	-0.000654609	0	0	1	NA
AC006076.1	0.0074568	0.00528006	0.004	0.001	1	NA
AC006111.1	0.000999033	0.00225597	0.002	0	1	NA
AC006111.2	0.0974509	0.00150703	0.002	0.001	1	NA
AC006111.3	1	0	0	0	1	NA
AC006112.1	1	0	0	0	1	NA
AC006115.2	2.14274977440676e-14	0.0473954	0.154	0.104	6.77751753644858e-10	NA
AC006116.10	0.00706069	0.00192141	0.003	0.001	1	NA
AC006116.11	0.102225	0.00193343	0.004	0.002	1	NA
AC006116.4	0.808602	9.60609957947325e-05	0	0.001	1	NA
AC006116.5	0.00581997	0.00444625	0.011	0.006	1	NA
AC006116.6	0.0269386	0.00153265	0.003	0.001	1	NA
AC006116.8	0.880452	0.00795118	0.03	0.031	1	NA
AC006116.9	0.467378	-5.42e-05	0.001	0.001	1	NA
AC006130.1	0.339028	0.00158898	0.003	0.004	1	NA
AC006130.3	0.206827	0.00102949	0.004	0.002	1	NA
AC006141.1	1.80112422027668e-38	0.0579854	0.13	0.056	5.69695590873512e-34	NA
AC006144.2	0.53216	0.00127616	0.001	0.001	1	NA
AC006145.1	1.28561923442526e-09	-0.00702429	0.01	0.027	4.06641363848708e-05	NA
AC006148.1	2.58368721372703e-15	0.0276839	0.025	0.006	8.17220265701859e-11	NA
AC006148.2	0.00722117	0.00227163	0.001	0	1	NA
AC006150.1	1	0	0	0	1	NA
AC006157.1	0.00191944	0.00114755	0.002	0	1	NA
AC006159.1	0.0496249	-0.00275489	0.006	0.009	1	NA
AC006160.1	0.0917091	0.00300962	0.014	0.018	1	NA
AC006197.2	1.55486302683855e-14	0.0224942	0.032	0.01	4.91803175389034e-10	NA
AC006206.1	0.674342	-0.000826929	0	0	1	NA
AC006206.2	0.367491	-0.0169042	0.015	0.017	1	NA
AC006207.1	0.120997	0.000197274	0	0	1	NA
AC006213.1	0.046773	-0.000662207	0.001	0.003	1	NA
AC006213.2	1.3683769487183e-43	-0.0363677	0.023	0.092	4.32817628879599e-39	NA
AC006213.3	5.69717683548454e-08	0.0318764	0.17	0.134	0.00180202	NA
AC006213.4	0.535202	0.00136499	0.005	0.004	1	NA
AC006213.5	0.0575308	0.000505052	0.001	0	1	NA
AC006213.7	0.468958	0.00181696	0.004	0.003	1	NA
AC006230.1	1.14301126837958e-31	0.0426393	0.058	0.014	3.61534464188461e-27	NA
AC006237.1	1	0	0	0	1	NA
AC006238.1	1	0	0	0	1	NA
AC006249.1	0.130925	0.00567926	0.03	0.025	1	NA
AC006252.1	0.00191944	0.00118149	0.002	0	1	NA
AC006262.1	0.000274214	0.00223089	0.003	0	1	NA
AC006262.2	0.138426	0.00243414	0.002	0.001	1	NA
AC006270.1	0.91958	0.00123963	0.002	0.002	1	NA
AC006273.1	1	0	0	0	1	NA
AC006288.1	0.010694	0.00319914	0.005	0.002	1	NA
AC006296.2	0.00370924	0.00215619	0.002	0	1	NA
AC006296.3	2.06039870823436e-08	0.00902481	0.007	0	0.000651704	NA
AC006299.1	3.32563567078785e-93	0.171211	0.405	0.213	1.0518985626702e-88	NA
AC006305.1	5.2029839878435e-05	0.00829712	0.006	0.001	1	NA
AC006305.3	0.0282912	0.00147208	0.001	0	1	NA
AC006329.1	0.00722117	0.0010527	0.001	0	1	NA
AC006333.1	6.26250119469828e-13	0.0146864	0.344	0.267	1.98082912788307e-08	NA
AC006333.2	7.89374096664805e-08	-0.00514948	0.007	0.02	0.00249679	NA
AC006348.1	0.000274214	0.00403733	0.003	0	1	NA
AC006355.2	9.38701628682805e-21	-0.0145234	0.008	0.038	2.96911325152371e-16	NA
AC006369.1	2.27683972570138e-24	0.0807062	0.246	0.166	7.20164405239346e-20	NA
AC006369.2	0.891285	0.000665754	0.007	0.007	1	NA
AC006372.1	1	0	0	0	1	NA
AC006372.2	1	0	0	0	1	NA
AC006372.3	0.000522403	0.00265312	0.002	0	1	NA
AC006378.1	0.0774495	-0.00116683	0.006	0.009	1	NA
AC006387.1	4.12732410873101e-11	-0.00829727	0.013	0.034	1.30547261559162e-06	NA
AC006398.1	0.459735	-0.00022028	0	0	1	NA
AC006427.2	0.00370924	0.00230402	0.002	0	1	NA
AC006435.1	1	0	0	0	1	NA
AC006435.2	0.00739739	0.00209454	0.007	0.003	1	NA
AC006435.3	0.272957	0.000220798	0	0	1	NA
AC006441.1	1	0	0	0	1	NA
AC006441.3	1	0	0	0	1	NA
AC006441.4	0.0575308	0.000693089	0.001	0	1	NA
AC006445.3	0.0039758	0.00138679	0.003	0.001	1	NA
AC006449.2	3.3883594894443e-05	-0.00284089	0.002	0.009	1	NA
AC006449.3	0.0501144	0.00162512	0.002	0.001	1	NA
AC006449.5	0.272957	0.00019304	0	0	1	NA
AC006449.6	0.000476993	-0.00321346	0.007	0.014	1	NA
AC006452.1	0.352323	-0.00120042	0.004	0.006	1	NA
AC006458.1	1	0	0	0	1	NA
AC006460.1	0.000623108	-0.00289889	0.003	0.008	1	NA
AC006460.2	0.370124	0.00287528	0.051	0.048	1	NA
AC006478.2	1	0	0	0	1	NA
AC006480.2	0.0105469	0.0144814	0.119	0.106	1	NA
AC006483.2	0.0681241	-0.000437114	0	0.001	1	NA
AC006487.1	6.75449924518469e-07	0.00615239	0.005	0	0.0213645	NA
AC006487.2	1	0	0	0	1	NA
AC006504.1	0.0626918	0.00441634	0.014	0.01	1	NA
AC006504.2	0.512564	-0.000312382	0.001	0	1	NA
AC006504.5	2.44064272237647e-17	0.0440611	0.091	0.049	7.71975293087677e-13	NA
AC006504.7	0.211754	-0.000198278	0.003	0.005	1	NA
AC006511.4	0.00370924	0.00136514	0.002	0	1	NA
AC006511.6	0.0002843	0.00572933	0.005	0.001	1	NA
AC006517.2	0.896202	9.83474804263964e-05	0	0	1	NA
AC006525.1	4.96284130182423e-06	0.00721018	0.011	0.003	0.156975	NA
AC006538.1	0.138689	0.0012259	0.002	0.001	1	NA
AC006538.3	4.22318986837316e-09	0.00711805	0.01	0.001	0.000133579	NA
AC006538.4	0.0373738	0.00174767	0.005	0.003	1	NA
AC006547.1	0.0955687	-0.000866566	0.037	0.044	1	NA
AC006547.2	1.71827989924842e-06	0.00367995	0.004	0	0.0543492	NA
AC006547.3	4.89257639524727e-10	-0.00540647	0.003	0.016	1.54752191381671e-05	NA
AC006557.1	1	0	0	0	1	NA
AC006557.3	1	0	0	0	1	NA
AC006566.1	0.00694683	0.00313674	0.013	0.007	1	NA
AC006566.2	0.0575308	0.000406336	0.001	0	1	NA
AC006581.1	0.0198861	-0.000634215	0.004	0.008	1	NA
AC006581.2	1.003096531721e-05	0.0175785	0.069	0.048	0.317279	NA
AC006942.1	0.0993631	-0.00192156	0.002	0.004	1	NA
AC006946.2	3.00388642276794e-06	0.00388583	0.006	0.001	0.0950129	NA
AC006946.3	0.00370924	0.000952053	0.002	0	1	NA
AC006960.2	0.00242758	0.00422065	0.002	0	1	NA
AC006960.3	1	0	0	0	1	NA
AC006970.3	1	0	0	0	1	NA
AC006972.1	0.00223252	0.00214581	0.012	0.006	1	NA
AC006974.1	0.00127777	0.00304768	0.003	0	1	NA
AC006974.2	1.13661211047904e-05	0.00578558	0.004	0	0.35951	NA
AC006994.2	1.34724529738692e-12	0.0366915	0.105	0.067	4.26133687563484e-08	NA
AC007001.1	0.00370924	0.00207387	0.002	0	1	NA
AC007009.1	1.20281908364826e-15	-0.00908149	0.005	0.026	3.80451676157945e-11	NA
AC007014.1	3.72469039281631e-15	-0.0121782	0.007	0.029	1.1781195712478e-10	NA
AC007014.2	0.00722117	0.000833964	0.001	0	1	NA
AC007029.1	0.0295587	-0.00118741	0	0.002	1	NA
AC007032.1	0.674702	3.50316809897697e-05	0	0	1	NA
AC007036.1	1	0	0	0	1	NA
AC007036.2	0.120997	0.000562404	0	0	1	NA
AC007036.3	1	0	0	0	1	NA
AC007036.5	1	0	0	0	1	NA
AC007038.1	2.57630120547282e-07	0.0374591	0.17	0.138	0.00814884	NA
AC007038.2	8.53685345593341e-08	-0.00830673	0.017	0.035	0.00270021	NA
AC007040.1	0.370779	-0.00145252	0	0.001	1	NA
AC007064.2	0.117798	0.0011314	0.002	0.001	1	NA
AC007066.2	0.903666	0.00144425	0.017	0.017	1	NA
AC007091.1	2.57369563766086e-08	0.0107245	0.009	0.001	0.00081406	NA
AC007098.1	4.29915692666166e-13	-0.00772632	0.015	0.04	1.35982333590308e-08	NA
AC007099.1	6.96013369922479e-07	0.00835787	0.01	0.002	0.0220149	NA
AC007100.1	2.88462581456754e-83	0.155053	0.22	0.076	9.12407145147712e-79	NA
AC007100.2	0.51946	0.000395058	0.003	0.002	1	NA
AC007106.1	0.000191444	0.00251203	0.003	0	1	NA
AC007106.2	0.13389	-8.92228e-05	0.007	0.005	1	NA
AC007114.1	0.500681	0.01068	0.026	0.024	1	NA
AC007114.2	2.369203378046e-98	-0.0917227	0.024	0.151	7.49379028475951e-94	NA
AC007126.1	5.75661923328625e-115	0.132871	0.303	0.116	1.82081866348844e-110	NA
AC007128.2	0.121301	0.00247161	0.013	0.01	1	NA
AC007130.1	1.9841343369157e-21	-0.0140618	0.005	0.032	6.27581690766434e-17	NA
AC007132.1	0.464264	0.00166515	0.004	0.004	1	NA
AC007163.1	0.00186056	0.00417251	0.004	0.001	1	NA
AC007179.1	0.0640146	-0.00286459	0.009	0.005	1	NA
AC007179.2	0.0282912	0.000722879	0.001	0	1	NA
AC007182.1	1	0	0	0	1	NA
AC007192.2	0.653602	0.000217606	0.001	0.001	1	NA
AC007193.1	0.00735794	-2.22352e-05	0.001	0.004	1	NA
AC007193.2	0.0866205	-0.0161619	0.054	0.063	1	NA
AC007193.3	1	0	0	0	1	NA
AC007216.1	0.114181	-0.000350817	0	0.001	1	NA
AC007216.2	0.0125416	-0.000270637	0.004	0.007	1	NA
AC007216.3	0.154484	-0.00021703	0.011	0.014	1	NA
AC007216.4	2.201520921259e-25	0.0627231	0.243	0.163	6.96341067394223e-21	NA
AC007218.1	0.272957	0.000265562	0	0	1	NA
AC007218.2	0.769684	0.000281036	0.001	0.001	1	NA
AC007218.3	0.256536	-0.000659922	0.002	0.001	1	NA
AC007220.1	8.80176815030004e-13	0.0197201	0.029	0.009	2.7839992659399e-08	NA
AC007220.2	0.685516	0.000264169	0.004	0.004	1	NA
AC007221.1	0.425565	0.00329971	0.021	0.019	1	NA
AC007222.2	0.120997	0.00061342	0	0	1	NA
AC007240.3	0.00219559	0.00215666	0.003	0.001	1	NA
AC007255.1	2.1242453745603e-06	0.0086137	0.023	0.011	0.0671899	NA
AC007262.2	3.47579099262155e-113	0.199319	0.399	0.191	1.0993926909662e-108	NA
AC007271.1	0.00722117	0.0025647	0.001	0	1	NA
AC007272.1	0.00722117	0.00172079	0.001	0	1	NA
AC007277.1	1.23559132694691e-05	0.00815768	0.007	0.001	0.390818	NA
AC007278.1	1	0	0	0	1	NA
AC007278.2	1	0	0	0	1	NA
AC007279.2	0.000142584	-0.00298536	0.009	0.019	1	NA
AC007285.1	0.0208357	0.00779095	0.011	0.007	1	NA
AC007285.2	0.0226858	-0.000308542	0.001	0.004	1	NA
AC007292.1	0.00459461	0.0015296	0.002	0	1	NA
AC007292.2	0.0784524	0.000525319	0.003	0.001	1	NA
AC007292.3	0.0608551	0.00347849	0.009	0.006	1	NA
AC007298.1	0.0282912	0.000789663	0.001	0	1	NA
AC007298.2	0.0102181	-0.00267673	0.001	0.004	1	NA
AC007314.1	0.250783	-0.00102838	0.004	0.006	1	NA
AC007317.1	0.746427	0.00630867	0.034	0.033	1	NA
AC007317.2	7.676970881171e-06	0.0128586	0.023	0.011	0.242823	NA
AC007319.1	3.47558183099822e-90	0.142274	0.2	0.062	1.09932653314474e-85	NA
AC007325.1	1	0	0	0	1	NA
AC007325.2	0.0827121	0.000980206	0.011	0.008	1	NA
AC007325.4	0.192084	-0.0025759	0.029	0.035	1	NA
AC007326.2	1	0	0	0	1	NA
AC007326.5	0.0739401	0.000125115	0.002	0.004	1	NA
AC007327.2	0.025454	-0.000530902	0	0.001	1	NA
AC007333.1	0.272957	0.000414942	0	0	1	NA
AC007333.2	0.000522403	0.00329329	0.002	0	1	NA
AC007336.1	0.821326	-0.000104741	0.001	0.001	1	NA
AC007336.2	1	0	0	0	1	NA
AC007342.1	0.254923	0.000946672	0.002	0.001	1	NA
AC007342.4	0.0575308	0.000879916	0.001	0	1	NA
AC007342.5	0.272957	0.000714455	0	0	1	NA
AC007344.1	2.91423981788175e-06	0.00797521	0.01	0.002	0.0921774	NA
AC007347.1	0.0300657	-0.00177806	0.007	0.011	1	NA
AC007349.1	0.120997	0.00106024	0	0	1	NA
AC007349.2	1	0	0	0	1	NA
AC007350.1	1	0	0	0	1	NA
AC007362.1	1	0	0	0	1	NA
AC007364.1	4.4292787629413e-30	0.0671452	0.09	0.035	1.40098087271833e-25	NA
AC007365.1	0.0222063	-0.000765248	0.001	0.004	1	NA
AC007368.1	0.00246126	0.0110288	0.011	0.005	1	NA
AC007370.1	0.471044	0.00380958	0.013	0.011	1	NA
AC007370.2	4.9563607971623e-28	0.0376484	0.091	0.037	1.56769692014244e-23	NA
AC007376.2	0.579189	0.000502662	0.006	0.005	1	NA
AC007378.1	0.821462	-0.000138189	0.001	0.001	1	NA
AC007381.1	7.9739494420809e-68	0.188759	0.724	0.446	2.52216020853019e-63	NA
AC007381.2	2.25344766998637e-05	-0.00249871	0.001	0.007	0.712765	NA
AC007383.2	0.0633753	-0.000813102	0.007	0.01	1	NA
AC007383.3	0.0197148	-0.00059135	0.003	0.006	1	NA
AC007384.1	5.368367058421e-21	-0.0189566	0.03	0.075	1.69801450057856e-16	NA
AC007387.2	0.0282912	0.000913308	0.001	0	1	NA
AC007387.3	0.0087741	0.00219263	0.002	0	1	NA
AC007389.1	4.04216525863239e-28	0.0619646	0.085	0.032	1.27853687130542e-23	NA
AC007389.3	0.00582759	0.00314286	0.006	0.002	1	NA
AC007389.5	1	0	0	0	1	NA
AC007390.2	2.284827343837e-12	0.0126279	0.04	0.017	7.22690888855645e-08	NA
AC007391.1	1	0	0	0	1	NA
AC007391.2	1	0	0	0	1	NA
AC007391.3	0.131589	0.0116724	0.132	0.124	1	NA
AC007402.1	1.90593812044098e-32	0.0696373	0.063	0.016	6.02848227495482e-28	NA
AC007405.1	1.56343774001386e-14	0.0243684	0.04	0.015	4.94515357166385e-10	NA
AC007405.3	0.00813745	-0.00197556	0.005	0.009	1	NA
AC007406.2	0.63819	-0.00132521	0.003	0.003	1	NA
AC007406.3	0.120314	8.99906734428108e-05	0.001	0	1	NA
AC007406.4	1	0	0	0	1	NA
AC007406.5	7.46021960854574e-09	0.0166297	0.075	0.048	0.000235967	NA
AC007422.1	2.27791024539646e-05	0.0076153	0.015	0.006	0.720503	NA
AC007431.1	0.11783	0.0018528	0.002	0.001	1	NA
AC007431.2	0.552925	0.000419856	0	0.001	1	NA
AC007432.1	0.00712163	0.00268911	0.003	0.001	1	NA
AC007448.4	0.402819	-0.000941211	0.001	0.002	1	NA
AC007448.5	6.36394452195395e-19	0.0246561	0.034	0.008	2.01291565229403e-14	NA
AC007450.1	0.120314	0.000297513	0.001	0	1	NA
AC007463.1	0.120997	0.000984715	0	0	1	NA
AC007463.2	0.272957	0.00077972	0	0	1	NA
AC007491.1	0.00191944	0.0023101	0.002	0	1	NA
AC007493.1	0.584895	0.0038282	0.004	0.005	1	NA
AC007494.2	0.0193547	-0.000456017	0.002	0.005	1	NA
AC007495.1	0.0290601	0.00445578	0.004	0.002	1	NA
AC007496.1	0.272957	0.000106685	0	0	1	NA
AC007496.2	0.327691	-0.000312709	0.001	0.001	1	NA
AC007497.1	0.120997	0.00031012	0	0	1	NA
AC007513.1	2.29999039632837e-08	0.0101966	0.015	0.004	0.000727487	NA
AC007527.1	0.120997	0.00092895	0	0	1	NA
AC007529.1	0.114181	-0.00163762	0	0.001	1	NA
AC007529.2	0.00825434	0.000363248	0.005	0.009	1	NA
AC007533.1	9.33366593152017e-08	-0.00569372	0.011	0.026	0.00295224	NA
AC007535.1	0.0222859	0.00363009	0.002	0.001	1	NA
AC007540.1	0.114181	-0.000309915	0	0.001	1	NA
AC007541.1	5.74175261980102e-10	-0.00595261	0.009	0.026	1.81611635364306e-05	NA
AC007546.1	0.812066	0.000767551	0.003	0.002	1	NA
AC007557.1	0.11783	0.000837405	0.002	0.001	1	NA
AC007557.3	0.892747	8.95574773210332e-05	0.001	0.001	1	NA
AC007557.4	0.120997	0.00113595	0	0	1	NA
AC007563.1	0.00191944	0.00140059	0.002	0	1	NA
AC007563.2	1.36073480847919e-86	0.196392	0.467	0.256	4.30400419921967e-82	NA
AC007563.4	0.433404	-9.82316e-06	0.006	0.004	1	NA
AC007566.1	3.04419102724743e-51	0.101941	0.35	0.215	9.62877621918364e-47	NA
AC007569.1	2.41822582989297e-06	-0.00281696	0.002	0.009	0.0764885	NA
AC007570.1	0.793797	4.07591649637985e-05	0.001	0.001	1	NA
AC007595.1	0.234637	-0.00014083	0.001	0	1	NA
AC007598.1	1	0	0	0	1	NA
AC007598.2	0.808307	1.41156364277275e-05	0	0.001	1	NA
AC007599.2	4.89080448243793e-06	-0.00240835	0.004	0.012	0.154696	NA
AC007601.1	0.330984	0.00154111	0.001	0.001	1	NA
AC007601.2	1	0	0	0	1	NA
AC007603.1	1	0	0	0	1	NA
AC007608.1	0.0087741	0.00208171	0.002	0	1	NA
AC007608.3	0.00397446	0.00183095	0.003	0.001	1	NA
AC007610.1	0.0254694	0.00326022	0.005	0.003	1	NA
AC007610.2	0.21886	0.00454245	0.006	0.004	1	NA
AC007610.5	0.00188782	0.00217526	0.004	0.001	1	NA
AC007611.1	0.0640702	0.00616443	0.02	0.015	1	NA
AC007613.1	0.148239	-0.000625282	0.004	0.006	1	NA
AC007614.1	0.0263114	0.00301701	0.004	0.002	1	NA
AC007619.1	0.846727	0.00191267	0.015	0.016	1	NA
AC007620.2	4.10579359260245e-08	0.0128792	0.026	0.011	0.00129866	NA
AC007620.3	0.00591874	0.00203322	0.004	0.001	1	NA
AC007622.2	0.00530694	0.000173532	0.005	0.01	1	NA
AC007637.1	0.910905	0.00291905	0.041	0.042	1	NA
AC007638.1	1	0	0	0	1	NA
AC007638.2	0.368565	-0.00119649	0.003	0.004	1	NA
AC007649.1	0.120997	0.00115128	0	0	1	NA
AC007652.1	0.0141965	0.00155901	0.001	0	1	NA
AC007652.2	0.387355	0.00142078	0.003	0.002	1	NA
AC007652.3	0.000174991	0.0079351	0.128	0.103	1	NA
AC007655.1	0.120997	0.000186157	0	0	1	NA
AC007655.2	1.76569539067524e-07	0.00657412	0.022	0.009	0.00558489	NA
AC007656.2	0.00185936	0.00550871	0.004	0.001	1	NA
AC007663.2	0.272957	0.000240317	0	0	1	NA
AC007663.3	0.0142347	-0.00101307	0.001	0.003	1	NA
AC007663.4	0.0454974	-0.000660062	0	0.002	1	NA
AC007666.1	8.27434726547613e-07	0.0049586	0.011	0.003	0.0261718	NA
AC007666.2	0.172419	0.00141894	0.021	0.025	1	NA
AC007671.1	1	0	0	0	1	NA
AC007679.1	0.835568	0.00148832	0.002	0.002	1	NA
AC007681.1	0.0245021	0.00977525	0.031	0.023	1	NA
AC007682.1	1	0	0	0	1	NA
AC007684.2	0.823286	-0.00048912	0.016	0.015	1	NA
AC007686.2	0.0102884	0.00248347	0.006	0.002	1	NA
AC007686.3	0.0455082	0.00441441	0.006	0.003	1	NA
AC007686.4	0.939265	0.00158568	0.014	0.013	1	NA
AC007687.1	1	0	0	0	1	NA
AC007688.3	0.0575308	0.000757785	0.001	0	1	NA
AC007695.1	9.73804655391182e-14	-0.00724872	0.004	0.023	3.08014412500231e-09	NA
AC007728.1	0.328627	0.00041261	0.003	0.004	1	NA
AC007728.2	0.11802	0.000706021	0.002	0.001	1	NA
AC007728.3	1	0	0	0	1	NA
AC007731.3	0.120997	0.000350228	0	0	1	NA
AC007736.1	5.02073783240527e-05	-0.00239668	0.001	0.007	1	NA
AC007743.1	0.0285128	-0.000147111	0.002	0.004	1	NA
AC007749.1	0.0123209	0.00291773	0.005	0.002	1	NA
AC007749.2	0.654038	1.40470378976952e-05	0.001	0.001	1	NA
AC007750.1	0.272957	0.000130742	0	0	1	NA
AC007773.1	0.00109905	0.00891739	0.017	0.009	1	NA
AC007780.1	1.3252945914565e-12	-0.0479132	0.094	0.143	4.1919067927769e-08	NA
AC007785.1	9.83168165385891e-07	0.00847105	0.009	0.002	0.0310976	NA
AC007785.3	0.059848	0.00292081	0.005	0.003	1	NA
AC007786.1	0.462208	0.0016019	0.004	0.004	1	NA
AC007786.4	0.000522403	0.00342051	0.002	0	1	NA
AC007787.1	0.0681241	-0.000448827	0	0.001	1	NA
AC007823.1	0.0549273	0.00253564	0.007	0.004	1	NA
AC007834.1	0.117925	0.00128814	0.002	0.001	1	NA
AC007846.1	0.000493296	0.0109512	0.01	0.004	1	NA
AC007848.1	0.133147	-0.00118493	0.001	0.003	1	NA
AC007849.1	1	0	0	0	1	NA
AC007861.1	1	0	0	0	1	NA
AC007877.1	0.0125869	0.00328278	0.009	0.005	1	NA
AC007878.1	5.41856460178823e-15	0.0297435	0.078	0.042	1.71389198354562e-10	NA
AC007879.2	1	0	0	0	1	NA
AC007879.3	5.83706470693914e-05	0.00740483	0.007	0.002	1	NA
AC007879.4	0.120997	0.000632021	0	0	1	NA
AC007879.5	1	0	0	0	1	NA
AC007880.1	0.0575308	0.00057089	0.001	0	1	NA
AC007881.2	6.20768971575457e-05	0.00495753	0.005	0.001	1	NA
AC007881.3	0.000518272	-0.00182478	0.001	0.004	1	NA
AC007881.4	0.000998612	-0.00189155	0.01	0.018	1	NA
AC007906.1	0.819626	0.0009143	0.007	0.006	1	NA
AC007906.2	0.674342	-0.000591998	0	0	1	NA
AC007907.1	0.0413869	-0.000454691	0	0.001	1	NA
AC007920.1	1	0	0	0	1	NA
AC007920.2	0.00077861	-0.00497928	0.031	0.045	1	NA
AC007922.1	0.272957	8.96680701832039e-05	0	0	1	NA
AC007922.2	0.0282912	0.000381803	0.001	0	1	NA
AC007922.3	0.0224878	0.00139955	0.002	0.001	1	NA
AC007922.4	0.0282912	0.00170602	0.001	0	1	NA
AC007923.4	2.8453934604523e-24	0.0335694	0.069	0.025	8.99997951541062e-20	NA
AC007938.2	0.793914	0.000226412	0.001	0.001	1	NA
AC007938.3	0.361881	-6.96421e-05	0	0	1	NA
AC007948.1	1	0	0	0	1	NA
AC007950.1	0.120997	0.000937553	0	0	1	NA
AC007950.2	0.00370924	0.00174773	0.002	0	1	NA
AC007952.2	0.0282912	0.00121413	0.001	0	1	NA
AC007952.3	0.853689	0.000165179	0	0	1	NA
AC007952.4	7.78330763469089e-105	0.123837	0.225	0.067	2.46186020485273e-100	NA
AC007952.5	0.459436	0.00127323	0	0	1	NA
AC007952.6	0.120997	0.000207841	0	0	1	NA
AC007952.7	0.120997	0.000975101	0	0	1	NA
AC007952.8	1	0	0	0	1	NA
AC007952.9	1	0	0	0	1	NA
AC007953.2	1	0	0	0	1	NA
AC007991.3	2.76616187950357e-08	0.0111727	0.012	0.003	0.000874937	NA
AC007993.2	0.272957	0.000289571	0	0	1	NA
AC007993.3	0.0575308	0.000647758	0.001	0	1	NA
AC007996.1	0.975268	0.000694318	0.012	0.012	1	NA
AC007998.3	0.272957	0.000354307	0	0	1	NA
AC007998.4	0.272957	8.82688748929427e-05	0	0	1	NA
AC008011.2	0.674702	-0.000353899	0	0	1	NA
AC008014.1	2.65853071749677e-40	0.160015	0.729	0.512	8.40893265944229e-36	NA
AC008026.3	8.26067420608605e-18	0.0160656	0.04	0.012	2.61285125138502e-13	NA
AC008033.3	9.67820334569494e-06	0.00250813	0.005	0	0.306122	NA
AC008035.1	0.847785	-0.00116554	0.001	0.002	1	NA
AC008040.1	0.511721	0.00241323	0.003	0.002	1	NA
AC008050.1	2.95776539394995e-11	0.0250122	0.027	0.009	9.3554119410637e-07	NA
AC008056.1	0.000508543	0.00467444	0.005	0.001	1	NA
AC008056.2	0.459436	0.000778233	0	0	1	NA
AC008056.3	0.0282912	0.00135163	0.001	0	1	NA
AC008060.1	0.234637	7.59775726130139e-05	0.001	0	1	NA
AC008060.3	0.0141965	0.00250855	0.001	0	1	NA
AC008060.5	0.272957	0.000540978	0	0	1	NA
AC008063.1	0.246554	-0.00018312	0	0.001	1	NA
AC008067.1	0.00461521	0.00224316	0.004	0.001	1	NA
AC008073.1	0.0575308	0.000871174	0.001	0	1	NA
AC008073.2	0.117798	0.00196727	0.002	0.001	1	NA
AC008074.2	0.246554	5.89174850474008e-05	0	0.001	1	NA
AC008079.1	4.86520908116876e-21	-0.0363746	0.034	0.081	1.53886563237368e-16	NA
AC008080.1	1	0	0	0	1	NA
AC008080.3	0.52691	0.00150084	0.001	0.002	1	NA
AC008080.4	0.0282912	0.00139446	0.001	0	1	NA
AC008083.2	0.0132625	0.00219851	0.003	0.001	1	NA
AC008083.3	0.0282912	0.00153598	0.001	0	1	NA
AC008083.4	1	0	0	0	1	NA
AC008088.1	0.0282912	0.00059571	0.001	0	1	NA
AC008105.1	0.0434521	0.00280513	0.003	0.001	1	NA
AC008105.3	0.000540539	0.00701715	0.021	0.012	1	NA
AC008114.1	0.972237	0.000177133	0.002	0.002	1	NA
AC008115.1	0.0575308	0.000929063	0.001	0	1	NA
AC008115.2	0.000522403	0.00337421	0.002	0	1	NA
AC008115.3	2.92389662029889e-08	-0.00497396	0.004	0.015	0.000924829	NA
AC008119.1	6.94596774295089e-18	-0.0152208	0.006	0.031	2.19700959709537e-13	NA
AC008121.2	0.00591874	0.00259004	0.004	0.001	1	NA
AC008121.3	0.282971	0.00016077	0.003	0.002	1	NA
AC008124.1	3.18641024163271e-12	0.0431727	0.169	0.124	1.00786155942843e-07	NA
AC008125.1	1	0	0	0	1	NA
AC008127.1	0.00426952	0.00313779	0.005	0.002	1	NA
AC008133.1	0.272957	0.00012348	0	0	1	NA
AC008147.1	0.0925147	0.00115626	0.001	0	1	NA
AC008147.2	2.9115765264582e-09	0.00884045	0.014	0.003	9.20931655318728e-05	NA
AC008149.1	1	0	0	0	1	NA
AC008149.2	0.0434724	0.00213565	0.003	0.001	1	NA
AC008154.1	1	0	0	0	1	NA
AC008164.1	0.120997	0.00136217	0	0	1	NA
AC008170.1	0.00331846	0.00224254	0.004	0.001	1	NA
AC008180.2	1	0	0	0	1	NA
AC008250.1	4.3971341374748e-38	-0.0548893	0.054	0.134	1.39081352768328e-33	NA
AC008250.2	0.0141965	0.000791631	0.001	0	1	NA
AC008264.2	0.775655	0.00130935	0.004	0.005	1	NA
AC008267.5	0.0598197	-0.000986435	0.018	0.024	1	NA
AC008268.1	0.0575308	0.000500965	0.001	0	1	NA
AC008269.1	9.13917662818076e-131	0.211399	0.401	0.173	2.89072156749357e-126	NA
AC008269.2	0.114181	-0.000272732	0	0.001	1	NA
AC008273.1	1	0	0	0	1	NA
AC008277.1	2.48295243382338e-06	-0.00373787	0.004	0.014	0.0785358	NA
AC008278.1	0.062062	0.000685484	0.001	0	1	NA
AC008278.2	0.0141965	0.0012837	0.001	0	1	NA
AC008280.3	6.16185607550016e-13	0.013953	0.019	0.004	1.9489950766807e-08	NA
AC008391.1	1	0	0	0	1	NA
AC008393.1	0.0230532	-0.000656243	0.014	0.021	1	NA
AC008395.1	0.0141965	0.000696929	0.001	0	1	NA
AC008397.1	0.0575308	0.0014713	0.001	0	1	NA
AC008403.2	0.0282912	0.00195897	0.001	0	1	NA
AC008403.3	3.29199716082996e-05	0.0105412	0.011	0.004	1	NA
AC008406.1	0.272957	0.000576454	0	0	1	NA
AC008415.1	7.04381257412554e-10	0.0235169	0.022	0.007	2.22795791719591e-05	NA
AC008429.1	0.937071	0.000835165	0.003	0.003	1	NA
AC008429.3	0.677302	0.0021507	0.002	0.002	1	NA
AC008434.1	5.662737351787e-11	0.0120982	0.018	0.004	1.79112382437023e-06	NA
AC008438.1	3.4544148523649e-13	0.0325293	0.073	0.04	1.09263141780302e-08	NA
AC008438.2	0.155525	0.000710455	0.002	0.001	1	NA
AC008440.1	3.62712727196004e-09	0.00985559	0.02	0.006	0.000114726	NA
AC008440.2	0.120997	0.000973044	0	0	1	NA
AC008443.1	1.12522282399655e-07	0.0322188	0.166	0.133	0.00355908	NA
AC008443.3	0.00396774	0.00093293	0.003	0.001	1	NA
AC008443.4	7.69173717568938e-22	-0.0133741	0.007	0.036	2.43289646867055e-17	NA
AC008443.5	0.00834368	-0.00343366	0.011	0.017	1	NA
AC008443.6	0.00339533	0.00309887	0.005	0.002	1	NA
AC008443.8	0.000413343	0.0049485	0.012	0.006	1	NA
AC008443.9	0.330909	0.00129112	0.001	0.001	1	NA
AC008453.1	0.412524	0.000444704	0	0.001	1	NA
AC008453.2	0.0091147	0.00366131	0.012	0.007	1	NA
AC008456.1	0.272957	0.000471198	0	0	1	NA
AC008459.1	1	0	0	0	1	NA
AC008462.1	1.99763608494342e-26	0.0458145	0.113	0.054	6.31852293667604e-22	NA
AC008464.1	0.0176722	-0.00157223	0.017	0.024	1	NA
AC008467.1	1.03989379558954e-63	0.056086	0.08	0.01	3.28918407544971e-59	NA
AC008474.1	9.72067952157455e-15	0.0309454	0.118	0.073	3.07465093267403e-10	NA
AC008494.3	0.0681241	-0.000386862	0	0.001	1	NA
AC008496.2	0.370757	0.00737462	0.14	0.137	1	NA
AC008496.3	0.361881	-0.000540089	0	0	1	NA
AC008507.2	0.114181	-0.000189885	0	0.001	1	NA
AC008507.4	0.00118371	0.00420752	0.009	0.004	1	NA
AC008507.5	0.00722117	0.00197212	0.001	0	1	NA
AC008514.1	0.000510009	0.00558123	0.021	0.012	1	NA
AC008517.1	0.459735	-0.000247298	0	0	1	NA
AC008522.1	0.0716161	-0.000228971	0.001	0.002	1	NA
AC008532.1	0.511827	0.000284864	0.001	0	1	NA
AC008534.1	0.234553	0.00107269	0.001	0	1	NA
AC008537.2	0.513212	0.000494878	0.003	0.002	1	NA
AC008537.4	0.988558	0.00177662	0.005	0.005	1	NA
AC008543.1	1.84186658940846e-10	0.0153027	0.022	0.007	5.82582402229896e-06	NA
AC008543.3	0.808307	-1.65861e-05	0	0.001	1	NA
AC008543.4	1	0	0	0	1	NA
AC008543.5	0.00722117	0.00147206	0.001	0	1	NA
AC008549.2	0.167113	0.00249103	0.006	0.004	1	NA
AC008551.1	3.07829053130401e-08	0.0110548	0.038	0.019	0.000973663	NA
AC008554.1	0.000906005	0.00118212	0.011	0.02	1	NA
AC008555.1	0.854024	-0.000630623	0	0	1	NA
AC008555.2	0.0612805	0.00508309	0.009	0.006	1	NA
AC008555.4	0.676123	0.00140136	0.006	0.005	1	NA
AC008555.5	0.387617	0.000560341	0.003	0.002	1	NA
AC008556.1	1	0	0	0	1	NA
AC008567.2	0.0575308	0.000475142	0.001	0	1	NA
AC008567.3	0.120997	0.00033288	0	0	1	NA
AC008568.1	0.000150675	0.00961781	0.008	0.003	1	NA
AC008569.1	0.00038775	-0.000461292	0.004	0.01	1	NA
AC008569.2	0.0623415	-0.00128811	0.006	0.009	1	NA
AC008571.2	2.03771727478889e-250	0.49088	0.707	0.349	6.44529974015726e-246	NA
AC008572.1	0.16873	0.00243674	0.002	0.001	1	NA
AC008574.1	0.000103558	0.00709363	0.005	0.001	1	NA
AC008581.1	0.0282912	0.00054231	0.001	0	1	NA
AC008588.1	0.0575308	0.000492044	0.001	0	1	NA
AC008591.1	1.79693555722203e-12	0.0185357	0.017	0.003	5.68370716749328e-08	NA
AC008592.1	0.0223067	0.00315648	0.002	0.001	1	NA
AC008592.2	0.00150861	-0.0034428	0.007	0.014	1	NA
AC008592.4	0.729374	0.000178645	0.002	0.001	1	NA
AC008608.2	1.12763216248872e-10	-0.00583006	0.003	0.017	3.56670052995183e-06	NA
AC008609.1	0.0039785	0.00152996	0.003	0.001	1	NA
AC008610.1	0.224765	0.00551715	0.013	0.011	1	NA
AC008619.1	0.00926232	0.0146113	0.044	0.035	1	NA
AC008622.2	1	0	0	0	1	NA
AC008625.1	0.162425	-0.00036213	0	0.001	1	NA
AC008627.1	1	0	0	0	1	NA
AC008629.1	6.12873032354259e-106	0.150453	0.315	0.132	1.93851740133652e-101	NA
AC008632.1	0.062062	0.000370684	0.001	0	1	NA
AC008649.1	0.272957	0.000177312	0	0	1	NA
AC008649.2	0.16143	0.00142253	0.035	0.03	1	NA
AC008655.1	0.0943139	-0.00290602	0.001	0.003	1	NA
AC008655.2	0.459436	0.00108096	0	0	1	NA
AC008659.1	0.278053	0.00138434	0.003	0.002	1	NA
AC008662.1	4.45781456830184e-08	0.00706634	0.009	0.001	0.00141001	NA
AC008663.1	0.120997	0.000470273	0	0	1	NA
AC008663.2	0.89262	0.000288265	0.001	0.001	1	NA
AC008667.1	6.36200327979742e-14	0.0205453	0.031	0.01	2.01230163739992e-09	NA
AC008667.2	0.00401744	-0.000904205	0	0.003	1	NA
AC008667.3	0.272957	0.000732177	0	0	1	NA
AC008674.1	0.835204	0.00153852	0.002	0.002	1	NA
AC008676.1	0.383538	0.00188685	0.003	0.002	1	NA
AC008679.1	3.71406434056012e-26	0.035199	0.067	0.023	1.17475855091917e-21	NA
AC008680.1	1	0	0	0	1	NA
AC008686.1	0.000107621	-0.00162405	0	0.004	1	NA
AC008687.4	1	0	0	0	1	NA
AC008691.1	2.86177631303423e-48	0.0798319	0.11	0.034	9.05179847812728e-44	NA
AC008696.2	0.0317062	-0.00913352	0.104	0.119	1	NA
AC008700.1	0.421948	-0.00082146	0.008	0.01	1	NA
AC008703.1	0.00329027	0.00276926	0.004	0.001	1	NA
AC008705.2	0.254877	0.000831084	0.002	0.001	1	NA
AC008708.2	0.0282912	0.00164305	0.001	0	1	NA
AC008728.1	0.835422	0.00177114	0.002	0.002	1	NA
AC008731.1	8.88281952843722e-82	-0.0721871	0.025	0.137	2.80963581684469e-77	NA
AC008734.1	0.0575308	0.00033362	0.001	0	1	NA
AC008735.1	0.00417448	0.00301049	0.005	0.002	1	NA
AC008735.2	1.98138569571119e-28	-0.0235025	0.012	0.055	6.26712295553451e-24	NA
AC008735.4	0.951672	-0.000130201	0.003	0.003	1	NA
AC008736.1	0.476363	0.00148481	0.009	0.011	1	NA
AC008737.1	0.00191944	0.00114693	0.002	0	1	NA
AC008738.1	0.74903	0.000165702	0.001	0.001	1	NA
AC008738.2	0.0575308	0.00156562	0.001	0	1	NA
AC008738.3	1	0	0	0	1	NA
AC008738.4	1	0	0	0	1	NA
AC008738.6	1	0	0	0	1	NA
AC008739.1	0.0141965	0.00199087	0.001	0	1	NA
AC008742.1	1	0	0	0	1	NA
AC008747.1	0.26732	-0.000534088	0.002	0.003	1	NA
AC008750.2	1	0	0	0	1	NA
AC008750.3	1	0	0	0	1	NA
AC008750.4	0.345737	-0.000522857	0.002	0.003	1	NA
AC008750.5	2.79975673856507e-07	0.00836585	0.01	0.002	0.00885563	NA
AC008750.7	0.0282912	0.001289	0.001	0	1	NA
AC008751.3	0.00626338	0.00201947	0.01	0.005	1	NA
AC008752.1	0.00242965	0.00206676	0.002	0	1	NA
AC008752.2	1	0	0	0	1	NA
AC008758.2	0.772427	0.00127232	0.003	0.003	1	NA
AC008759.2	1	0	0	0	1	NA
AC008759.3	1	0	0	0	1	NA
AC008760.1	0.808602	0.000466799	0	0.001	1	NA
AC008760.2	0.000274214	0.00289659	0.003	0	1	NA
AC008761.1	0.00656238	-0.00173167	0.003	0.006	1	NA
AC008763.1	0.0481785	-0.000352138	0.001	0.003	1	NA
AC008764.2	0.661177	0.00213488	0.006	0.006	1	NA
AC008764.3	0.120997	0.00026334	0	0	1	NA
AC008764.6	0.993179	0.000901958	0.006	0.006	1	NA
AC008764.7	0.132242	0.000894509	0.007	0.004	1	NA
AC008764.8	0.000392099	-0.00240516	0.01	0.019	1	NA
AC008766.1	1	0	0	0	1	NA
AC008770.3	0.379141	0.000483127	0.008	0.006	1	NA
AC008771.1	1.62466929206312e-20	-0.0500113	0.098	0.165	5.13882897079566e-16	NA
AC008780.1	1.13661211047904e-05	0.00630208	0.004	0	0.35951	NA
AC008780.2	0.0514165	-0.00159285	0.011	0.015	1	NA
AC008781.1	0.791877	0.000130642	0.01	0.011	1	NA
AC008781.2	0.0962931	0.0003753	0.005	0.007	1	NA
AC008781.3	0.258204	9.48722571835568e-05	0.016	0.019	1	NA
AC008786.1	0.0167718	0.00339865	0.002	0	1	NA
AC008798.2	0.542547	-0.00159493	0.002	0.001	1	NA
AC008798.3	0.272957	0.000301108	0	0	1	NA
AC008805.2	0.0575308	0.00141017	0.001	0	1	NA
AC008825.1	2.74720577946372e-53	0.106501	0.065	0.008	8.68941188044375e-49	NA
AC008840.1	0.797247	0.00343062	0.012	0.012	1	NA
AC008852.1	1	0	0	0	1	NA
AC008869.1	1	0	0	0	1	NA
AC008870.2	1.7808836064032e-06	0.00786154	0.029	0.015	0.0563293	NA
AC008870.4	0.373282	0.000798061	0.008	0.01	1	NA
AC008871.1	0.000480834	-0.00143554	0.004	0.011	1	NA
AC008875.1	0.120997	0.000488845	0	0	1	NA
AC008875.2	1	0	0	0	1	NA
AC008875.3	0.532689	0.000307937	0.001	0.001	1	NA
AC008877.1	0.272957	0.000296923	0	0	1	NA
AC008883.1	9.77666499159574e-08	-0.00387742	0.004	0.015	0.00309236	NA
AC008883.2	0.0413869	-0.000505233	0	0.001	1	NA
AC008883.3	0.00198885	0.00479565	0.014	0.007	1	NA
AC008892.1	1.00454570166527e-13	-0.00294632	0.019	0.048	3.17737805436724e-09	NA
AC008894.2	0.388089	0.000284351	0.003	0.002	1	NA
AC008897.2	0.00711692	0.00246183	0.003	0.001	1	NA
AC008897.3	0.120997	0.00075326	0	0	1	NA
AC008906.1	0.00888024	0.00607641	0.017	0.011	1	NA
AC008906.2	0.184206	-0.000275101	0.002	0.004	1	NA
AC008914.1	0.00391029	-0.000828833	0	0.002	1	NA
AC008915.1	0.464522	0.000733362	0.004	0.004	1	NA
AC008915.2	0.477397	0.00792084	0.02	0.018	1	NA
AC008937.1	0.36786	0.000889339	0.002	0.001	1	NA
AC008937.2	0.000249113	-0.00123581	0.005	0.012	1	NA
AC008937.3	0.264201	-0.0013282	0.003	0.004	1	NA
AC008938.1	0.00830602	0.00238092	0.002	0	1	NA
AC008945.1	0.272957	0.000201534	0	0	1	NA
AC008945.2	1.19681465506589e-06	0.00796793	0.008	0.002	0.0378552	NA
AC008946.1	0.00601291	0.00793163	0.026	0.018	1	NA
AC008948.1	1	0	0	0	1	NA
AC008957.1	9.51592148274176e-05	0.0127914	0.046	0.031	1	NA
AC008957.2	0.00127231	-0.00291154	0.078	0.099	1	NA
AC008964.1	0.197161	-0.000196441	0	0	1	NA
AC008966.1	5.26688086894147e-16	0.0353581	0.085	0.045	1.66591441884619e-11	NA
AC008966.2	0.253779	-0.000250106	0	0.001	1	NA
AC008966.3	0.120997	0.00050996	0	0	1	NA
AC008969.1	0.000122645	-0.0115329	0.091	0.118	1	NA
AC008969.2	0.062062	0.000516976	0.001	0	1	NA
AC008972.1	0.0575308	0.000419957	0.001	0	1	NA
AC008972.2	0.674456	0.000484602	0.002	0.003	1	NA
AC008982.2	0.0511176	0.0015761	0.012	0.008	1	NA
AC008991.1	0.00926782	0.00319213	0.007	0.003	1	NA
AC008992.1	0.272957	0.000429357	0	0	1	NA
AC009005.1	0.00722117	0.00216309	0.001	0	1	NA
AC009019.1	0.0681241	-0.000306933	0	0.001	1	NA
AC009019.2	0.200484	-0.000386835	0.001	0.001	1	NA
AC009021.1	0.0681241	-0.000319438	0	0.001	1	NA
AC009021.2	1	0	0	0	1	NA
AC009032.1	0.000339241	0.00331349	0.009	0.003	1	NA
AC009034.1	0.0413869	-0.000436825	0	0.001	1	NA
AC009035.1	0.0152853	0.0015256	0.002	0	1	NA
AC009041.1	1	0	0	0	1	NA
AC009041.2	0.361881	-0.000550292	0	0	1	NA
AC009041.4	1.59491771572495e-05	0.00592067	0.008	0.002	0.504472	NA
AC009053.2	0.629582	0.0016253	0.002	0.002	1	NA
AC009053.3	0.802624	0.00356511	0.006	0.005	1	NA
AC009054.1	0.00134172	0.00110047	0.007	0.003	1	NA
AC009054.2	0.166119	-0.0012102	0.003	0.005	1	NA
AC009055.1	8.52376544624697e-08	0.013651	0.013	0.003	0.00269607	NA
AC009055.2	0.00370924	0.00404011	0.002	0	1	NA
AC009060.1	9.71228503146546e-09	-0.00678003	0.015	0.034	0.0003072	NA
AC009061.2	2.29815526327665e-72	0.103755	0.287	0.134	7.26906509774403e-68	NA
AC009063.1	1	0	0	0	1	NA
AC009063.2	0.0609716	0.00874223	0.038	0.031	1	NA
AC009063.3	0.000168819	0.0111661	0.034	0.022	1	NA
AC009065.1	0.0511475	0.000665118	0.002	0	1	NA
AC009065.2	0.66431	-0.000881458	0.003	0.002	1	NA
AC009065.3	1	0	0	0	1	NA
AC009065.4	0.00279969	0.00353872	0.011	0.006	1	NA
AC009065.5	0.128064	0.00100422	0.003	0.002	1	NA
AC009065.6	1	0	0	0	1	NA
AC009065.7	0.120997	0.000241417	0	0	1	NA
AC009065.8	0.80217	0.0018402	0.004	0.004	1	NA
AC009081.1	0.0282912	0.00193434	0.001	0	1	NA
AC009081.2	4.75526250897511e-07	0.00974111	0.01	0.002	0.0150409	NA
AC009087.1	0.552458	-0.000163654	0	0.001	1	NA
AC009088.1	0.0379988	0.000932485	0.005	0.003	1	NA
AC009088.2	0.0575308	0.000416127	0.001	0	1	NA
AC009090.1	0.0292007	0.00265797	0.004	0.002	1	NA
AC009090.2	1	0	0	0	1	NA
AC009090.3	0.114181	-0.000240866	0	0.001	1	NA
AC009090.6	3.27387449013286e-06	-0.00741955	0.008	0.019	0.103553	NA
AC009093.1	0.361881	-7.22168e-05	0	0	1	NA
AC009093.2	7.64137039926397e-25	0.0427569	0.098	0.044	2.41696545728719e-20	NA
AC009093.4	4.95420760958315e-08	-0.00447265	0.002	0.012	0.00156702	NA
AC009093.6	0.00817208	0.00596778	0.011	0.006	1	NA
AC009095.1	1	0	0	0	1	NA
AC009097.1	3.05035753464191e-05	-0.00164879	0	0.005	0.964828	NA
AC009097.3	0.0575308	0.00133344	0.001	0	1	NA
AC009102.1	0.0278741	0.00149718	0.002	0	1	NA
AC009102.4	0.62283	0.000479503	0.003	0.003	1	NA
AC009107.1	5.2261211140971e-06	0.00470747	0.005	0	0.165302	NA
AC009107.2	0.041717	-0.000209219	0.039	0.049	1	NA
AC009108.3	0.00370924	0.00177074	0.002	0	1	NA
AC009113.1	0.606339	0.00403299	0.014	0.012	1	NA
AC009117.2	0.000271957	0.00747696	0.007	0.002	1	NA
AC009118.2	0.105903	-0.000234669	0.001	0.002	1	NA
AC009118.3	0.554415	0.00226096	0.053	0.057	1	NA
AC009119.1	0.904997	0.00162632	0.013	0.013	1	NA
AC009120.2	3.52980684592961e-178	0.271481	0.698	0.357	1.11647790536754e-173	NA
AC009120.3	0.26497	0.00107522	0.002	0.001	1	NA
AC009120.4	0.039026	-0.000584879	0.005	0.009	1	NA
AC009120.5	4.0411901009545e-11	0.0086448	0.024	0.007	1.27822842893191e-06	NA
AC009121.3	0.120997	0.000330115	0	0	1	NA
AC009123.1	1	0	0	0	1	NA
AC009126.1	1.51542036598179e-44	0.0810139	0.174	0.081	4.79327461760039e-40	NA
AC009127.1	0.0413869	-0.000369074	0	0.001	1	NA
AC009133.1	9.70011773430051e-06	-0.00401208	0.005	0.014	0.306815	NA
AC009133.2	1	0	0	0	1	NA
AC009133.3	1	0	0	0	1	NA
AC009133.4	0.0681241	-0.000328436	0	0.001	1	NA
AC009137.1	0.657777	0.00441904	0.011	0.012	1	NA
AC009137.2	1	0	0	0	1	NA
AC009139.1	3.22148968158447e-06	0.00688829	0.004	0	0.101896	NA
AC009139.2	0.109854	0.000797297	0.003	0.001	1	NA
AC009141.1	0.401742	0.00056121	0.001	0.002	1	NA
AC009142.1	4.00357855087234e-12	0.0149954	0.032	0.011	1.26633189564092e-07	NA
AC009145.1	0.0321269	0.00136873	0.001	0	1	NA
AC009145.3	0.769787	0.000349471	0.001	0.001	1	NA
AC009148.1	2.19432450066626e-05	0.0094458	0.019	0.009	0.694065	NA
AC009152.1	1	0	0	0	1	NA
AC009152.3	0.0282912	0.00189484	0.001	0	1	NA
AC009152.6	1	0	0	0	1	NA
AC009154.1	0.00370924	0.00222723	0.002	0	1	NA
AC009154.2	1	0	0	0	1	NA
AC009158.1	0.00370924	0.00231876	0.002	0	1	NA
AC009159.2	0.197161	-0.00014649	0	0	1	NA
AC009159.3	0.0980799	-0.000415709	0	0.001	1	NA
AC009163.1	0.381761	0.000885625	0.004	0.003	1	NA
AC009163.4	0.0221811	0.00180803	0.003	0.001	1	NA
AC009163.7	2.08160843808444e-10	-0.00728046	0.009	0.027	6.58412748966107e-06	NA
AC009171.2	1.86118164721212e-12	0.0132293	0.022	0.005	5.88691755013193e-08	NA
AC009185.1	0.880842	-0.000596622	0.004	0.004	1	NA
AC009226.1	2.30034310522795e-24	0.0481013	0.085	0.037	7.27598524183599e-20	NA
AC009227.1	1	0	0	0	1	NA
AC009228.1	5.88491899323599e-09	-0.00308344	0.007	0.021	0.00018614	NA
AC009229.1	0.0575308	0.00184822	0.001	0	1	NA
AC009229.2	0.00722117	0.00139019	0.001	0	1	NA
AC009229.3	1	0	0	0	1	NA
AC009230.1	0.120997	0.00107417	0	0	1	NA
AC009234.1	0.166775	0.000973621	0.001	0	1	NA
AC009236.1	0.533431	-0.000916168	0.001	0.001	1	NA
AC009236.2	0.000999033	0.00294524	0.002	0	1	NA
AC009237.14	0.467437	0.000190206	0.001	0.002	1	NA
AC009237.15	8.19977936675532e-06	0.00306562	0.004	0	0.259359	NA
AC009242.1	0.00242138	0.00286503	0.002	0	1	NA
AC009244.2	0.796261	0.00116925	0.001	0.001	1	NA
AC009248.2	0.114181	-0.000244992	0	0.001	1	NA
AC009262.1	0.00122754	0.00370802	0.004	0.001	1	NA
AC009264.1	0.311912	-0.079799	0.344	0.292	1	NA
AC009268.2	0.0575308	0.000692651	0.001	0	1	NA
AC009269.2	0.0007727	0.00070314	0.004	0.01	1	NA
AC009269.3	0.0282912	0.00138808	0.001	0	1	NA
AC009269.4	0.0497162	0.00204427	0.003	0.001	1	NA
AC009269.5	3.55519181729494e-05	0.00408438	0.009	0.003	1	NA
AC009271.1	0.0351736	0.00467431	0.005	0.002	1	NA
AC009271.2	0.272957	0.000144511	0	0	1	NA
AC009275.1	0.0437992	0.00189107	0.003	0.001	1	NA
AC009276.1	0.0392427	0.0014443	0.002	0.001	1	NA
AC009283.1	3.78532217134739e-06	0.00554558	0.011	0.003	0.11973	NA
AC009292.1	0.272957	0.000243926	0	0	1	NA
AC009292.2	0.0114543	0.0035582	0.006	0.003	1	NA
AC009299.3	0.0121649	0.0111913	0.019	0.013	1	NA
AC009301.1	0.272957	0.000221519	0	0	1	NA
AC009303.2	0.178534	0.00197882	0.018	0.022	1	NA
AC009309.1	4.38120628696373e-09	-0.00391909	0.001	0.011	0.000138578	NA
AC009312.1	0.125888	-0.0019452	0.005	0.003	1	NA
AC009313.1	1.01153949607919e-05	0.00621551	0.005	0.001	0.31995	NA
AC009315.1	1.65700907007517e-64	0.116949	0.149	0.047	5.24111968864775e-60	NA
AC009318.1	1.20428300226242e-33	0.0600841	0.357	0.238	3.80914713615605e-29	NA
AC009318.2	0.16415	-0.000104866	0.005	0.003	1	NA
AC009318.3	0.00993187	0.00171543	0.008	0.004	1	NA
AC009318.4	0.000192118	0.00493603	0.011	0.004	1	NA
AC009320.1	0.747723	0.000962004	0.001	0.001	1	NA
AC009365.1	1.99561675561428e-08	0.010916	0.011	0.002	0.000631214	NA
AC009365.4	7.2314548457108e-12	-0.0112501	0.013	0.035	2.28730916769833e-07	NA
AC009387.1	0.00826085	0.00442913	0.002	0	1	NA
AC009396.3	1	0	0	0	1	NA
AC009403.1	5.21966380503327e-11	-0.00965588	0.02	0.045	1.65097966153202e-06	NA
AC009403.2	4.10555498174628e-21	0.0292528	0.043	0.012	1.29858704072635e-16	NA
AC009404.1	0.0201933	0.0042185	0.019	0.013	1	NA
AC009407.1	0.0575308	0.000316334	0.001	0	1	NA
AC009410.1	0.0192838	-0.000996148	0.002	0.005	1	NA
AC009411.1	0.0141965	0.000906125	0.001	0	1	NA
AC009411.2	0.0087741	0.00240283	0.002	0	1	NA
AC009413.2	3.44631760456566e-05	-0.000407913	0.002	0.009	1	NA
AC009432.2	0.517942	0.00168553	0.003	0.003	1	NA
AC009434.1	0.0141965	0.0017893	0.001	0	1	NA
AC009435.1	0.000219943	0.00755119	0.015	0.007	1	NA
AC009446.1	0.0575308	0.00149548	0.001	0	1	NA
AC009464.1	0.00191944	0.00113106	0.002	0	1	NA
AC009468.1	0.0575308	0.00157965	0.001	0	1	NA
AC009478.1	0.0790924	0.00676507	0.009	0.006	1	NA
AC009480.1	0.227364	6.97011300837796e-06	0.001	0.002	1	NA
AC009486.1	0.853355	7.73195170604017e-05	0	0	1	NA
AC009486.2	0.00912455	0.00428024	0.008	0.004	1	NA
AC009494.2	0.272957	0.00045567	0	0	1	NA
AC009495.1	0.0177082	0.0036255	0.009	0.005	1	NA
AC009495.2	1	0	0	0	1	NA
AC009495.3	0.272957	0.000455814	0	0	1	NA
AC009498.1	1	0	0	0	1	NA
AC009501.3	1.23259687761109e-14	-0.0193115	0.039	0.077	3.89870392388387e-10	NA
AC009505.1	0.937741	0.00592218	0.018	0.018	1	NA
AC009506.1	0.0207576	-0.00252109	0.006	0.011	1	NA
AC009509.1	2.17302321942045e-06	-0.00260764	0.001	0.007	0.0687327	NA
AC009509.2	0.253938	0.000154551	0	0.001	1	NA
AC009509.4	0.155492	0.00106087	0.002	0.001	1	NA
AC009511.1	1	0	0	0	1	NA
AC009511.2	0.821191	0.000119711	0.001	0.001	1	NA
AC009518.1	0.000714557	0.00511529	0.003	0	1	NA
AC009522.1	5.3691986832218e-16	0.0252026	0.033	0.01	1.69827754350306e-11	NA
AC009531.1	1	0	0	0	1	NA
AC009533.3	1	0	0	0	1	NA
AC009542.1	0.000780526	-0.00102753	0.001	0.006	1	NA
AC009549.1	0.162554	0.00020348	0	0.001	1	NA
AC009554.1	3.43907351984951e-06	-0.00299294	0.019	0.035	0.108778	NA
AC009554.2	0.114181	-0.00023178	0	0.001	1	NA
AC009560.1	1	0	0	0	1	NA
AC009560.3	0.00270201	0.002901	0.005	0.001	1	NA
AC009560.4	3.30551423914986e-06	0.0101309	0.02	0.009	0.104553	NA
AC009562.1	0.0240597	0.00433837	0.007	0.004	1	NA
AC009563.1	0.328292	0.000990307	0.001	0.001	1	NA
AC009567.1	0.0282912	0.00233425	0.001	0	1	NA
AC009570.1	0.025454	-0.000514119	0	0.001	1	NA
AC009570.2	0.00160972	0.00600379	0.008	0.004	1	NA
AC009597.1	0.0575308	0.000934858	0.001	0	1	NA
AC009623.1	1.16615395775652e-13	0.01642	0.022	0.005	3.68854496838388e-09	NA
AC009623.2	1	0	0	0	1	NA
AC009623.3	0.0575308	0.00140848	0.001	0	1	NA
AC009630.1	0.00595071	0.00716229	0.038	0.028	1	NA
AC009630.2	1	0	0	0	1	NA
AC009630.3	0.755364	0.000655083	0.003	0.003	1	NA
AC009646.2	0.0926903	0.00125627	0.001	0	1	NA
AC009652.1	8.4957471217057e-09	0.0144484	0.038	0.018	0.00026872	NA
AC009654.1	0.0141965	0.00173808	0.001	0	1	NA
AC009682.1	1	0	0	0	1	NA
AC009686.1	0.52705	0.00136999	0.001	0.002	1	NA
AC009686.2	0.0575308	0.000462109	0.001	0	1	NA
AC009690.2	0.000118615	-0.00617359	0.04	0.059	1	NA
AC009704.2	0.22416	0.000620838	0.002	0.001	1	NA
AC009704.3	0.674702	-0.0002464	0	0	1	NA
AC009716.1	0.630349	0.00180014	0.003	0.003	1	NA
AC009720.1	4.90362694293233e-07	0.00911459	0.005	0	0.0155102	NA
AC009731.1	0.00370924	0.0016715	0.002	0	1	NA
AC009754.1	0.945862	-0.000588901	0.01	0.01	1	NA
AC009754.2	0.160281	0.00374467	0.01	0.007	1	NA
AC009779.2	0.739824	0.00301164	0.013	0.014	1	NA
AC009779.5	0.0440103	-0.000500422	0.01	0.015	1	NA
AC009802.1	0.227117	-0.000594589	0.001	0.002	1	NA
AC009803.1	0.0167787	0.00148653	0.002	0	1	NA
AC009803.2	0.120997	0.000619593	0	0	1	NA
AC009812.1	0.284083	0.00294551	0.011	0.013	1	NA
AC009812.3	0.0110063	0.00339977	0.007	0.003	1	NA
AC009812.4	0.000550774	0.00419409	0.007	0.002	1	NA
AC009831.1	0.00987349	-0.000707497	0	0.002	1	NA
AC009831.3	0.197161	-0.000206037	0	0	1	NA
AC009835.1	0.234553	0.00103592	0.001	0	1	NA
AC009869.1	0.272957	0.000510348	0	0	1	NA
AC009878.2	8.30789559050456e-37	-0.178268	0.141	0.23	2.62778737527659e-32	NA
AC009879.4	5.19960492446344e-27	0.0495609	0.118	0.057	1.64463503760779e-22	NA
AC009884.1	0.000155317	-0.00100779	0.003	0.009	1	NA
AC009899.1	5.04739553101888e-07	0.0085028	0.007	0.001	0.0159649	NA
AC009902.2	1	0	0	0	1	NA
AC009902.3	1	0	0	0	1	NA
AC009948.2	2.55759929082408e-25	0.0341901	0.06	0.02	8.08968655687658e-21	NA
AC009948.3	5.73416791557609e-05	0.00472473	0.007	0.002	1	NA
AC009950.1	0.135192	0.00366581	0.003	0.002	1	NA
AC009951.5	0.0145388	-0.000678148	0.003	0.007	1	NA
AC009951.6	0.361881	-0.00013086	0	0	1	NA
AC009955.1	0.731723	0.0049219	0.022	0.023	1	NA
AC009955.2	0.0192563	0.00498874	0.018	0.013	1	NA
AC009955.3	0.672136	0.000861106	0.004	0.005	1	NA
AC009955.4	0.00722117	0.000884268	0.001	0	1	NA
AC009961.1	5.15383834408295e-22	0.0599404	0.213	0.142	1.63015906823344e-17	NA
AC009961.4	0.000120736	-0.00307526	0.001	0.006	1	NA
AC009962.1	0.330756	0.00325632	0.007	0.005	1	NA
AC009965.1	0.459735	0.000233538	0	0	1	NA
AC009970.1	0.120997	0.000206341	0	0	1	NA
AC009971.1	0.512564	-2.14096e-05	0.001	0	1	NA
AC009974.1	1	0	0	0	1	NA
AC009974.2	0.808602	6.32645209341319e-05	0	0.001	1	NA
AC009975.1	5.23105057203318e-23	0.0435508	0.036	0.007	1.65458129593409e-18	NA
AC009975.2	4.16359305812862e-10	0.013772	0.014	0.003	1.31694448428608e-05	NA
AC009996.1	0.00049805	0.00348786	0.023	0.013	1	NA
AC010082.1	0.000402526	-0.000558091	0	0.004	1	NA
AC010092.1	0.00268282	0.00157834	0.004	0.001	1	NA
AC010096.1	0.000574372	0.00351522	0.005	0.001	1	NA
AC010105.1	4.0349526744535e-05	0.00604962	0.003	0	1	NA
AC010132.1	0.272957	0.000543344	0	0	1	NA
AC010132.4	0.0224836	0.00292671	0.007	0.003	1	NA
AC010136.1	0.38774	-0.00618095	0.02	0.023	1	NA
AC010145.1	9.19687918462287e-06	0.00797085	0.006	0.001	0.290897	NA
AC010148.1	4.51703673110788e-47	0.0731574	0.091	0.025	1.42873871804942e-42	NA
AC010149.1	0.215663	0.00401698	0.007	0.005	1	NA
AC010157.1	1	0	0	0	1	NA
AC010168.1	5.0327487033616e-90	0.156157	0.476	0.264	1.59185841487327e-85	NA
AC010168.2	0.000106244	0.0152841	0.043	0.029	1	NA
AC010173.1	0.0326277	0.00514849	0.006	0.003	1	NA
AC010175.1	5.16529573494985e-07	0.00546989	0.024	0.011	0.0163378	NA
AC010181.1	0.0282912	0.00192838	0.001	0	1	NA
AC010183.2	0.00128327	0.00297182	0.003	0	1	NA
AC010185.1	0.0575308	0.000781719	0.001	0	1	NA
AC010186.3	5.72164041955199e-08	0.0129594	0.034	0.017	0.00180975	NA
AC010196.1	1	0	0	0	1	NA
AC010197.1	2.91133228191646e-06	0.0116917	0.008	0.002	0.0920854	NA
AC010198.1	0.309934	0.00180438	0.046	0.051	1	NA
AC010198.2	0.156472	0.0100357	0.014	0.011	1	NA
AC010201.1	0.616038	8.67817652275022e-05	0.001	0.002	1	NA
AC010201.2	0.0192359	0.00249367	0.01	0.006	1	NA
AC010201.3	1.45390908601282e-20	0.0471427	0.128	0.074	4.59871443905854e-16	NA
AC010203.2	0.0575308	0.000451165	0.001	0	1	NA
AC010205.1	0.0228397	0.00207173	0.007	0.003	1	NA
AC010207.1	3.18664648092762e-11	0.00814116	0.014	0.002	1.00793628191741e-06	NA
AC010210.1	1.12285421963061e-79	0.148739	0.399	0.225	3.55158789669162e-75	NA
AC010226.1	0.0354422	0.0105451	0.074	0.064	1	NA
AC010230.1	0.904762	0.00532553	0.007	0.007	1	NA
AC010245.1	0.00063854	-0.00115759	0	0.003	1	NA
AC010245.2	0.00734033	0.00305525	0.007	0.003	1	NA
AC010247.1	1	0	0	0	1	NA
AC010247.2	0.272957	0.000513726	0	0	1	NA
AC010255.1	0.295512	0.00098414	0.001	0	1	NA
AC010255.3	0.00122722	0.00285631	0.005	0.001	1	NA
AC010260.1	0.0571931	0.00061825	0.007	0.011	1	NA
AC010261.1	0.162554	0.000431845	0	0.001	1	NA
AC010261.2	8.28487566328368e-08	-0.0057546	0.006	0.019	0.00262051	NA
AC010266.2	0.120997	0.000377381	0	0	1	NA
AC010267.1	0.272957	0.000301108	0	0	1	NA
AC010271.1	1	0	0	0	1	NA
AC010271.2	0.0328994	-0.00133415	0.001	0.003	1	NA
AC010273.2	0.564418	0.00449439	0.021	0.023	1	NA
AC010273.3	1	0	0	0	1	NA
AC010275.1	0.793914	0.000959205	0.001	0.001	1	NA
AC010280.1	0.206345	0.00324974	0.004	0.002	1	NA
AC010280.2	1	0	0	0	1	NA
AC010285.1	1	0	0	0	1	NA
AC010285.3	0.197161	-0.00025553	0	0	1	NA
AC010291.1	0.272957	0.000400339	0	0	1	NA
AC010300.1	0.216906	0.000874736	0.007	0.01	1	NA
AC010307.2	0.000678728	0.00421054	0.003	0	1	NA
AC010307.3	0.120997	0.00102795	0	0	1	NA
AC010307.4	0.361881	-0.000516137	0	0	1	NA
AC010319.3	1	0	0	0	1	NA
AC010319.4	0.287293	0.00227971	0.004	0.002	1	NA
AC010319.5	0.272957	0.000243246	0	0	1	NA
AC010320.1	0.00242965	0.00107909	0.002	0	1	NA
AC010320.2	1.37444435586369e-22	-0.0199613	0.008	0.04	4.34736749759684e-18	NA
AC010320.3	0.842295	0.00294238	0.007	0.007	1	NA
AC010320.4	0.0168124	-0.00146839	0.012	0.018	1	NA
AC010325.1	0.00447758	0.00331967	0.003	0	1	NA
AC010325.2	1	0	0	0	1	NA
AC010326.3	1.88675013116511e-09	0.00683686	0.014	0.003	5.96779066487526e-05	NA
AC010327.4	0.00074366	0.0245277	0.184	0.164	1	NA
AC010327.5	0.838042	-0.000789006	0.002	0.002	1	NA
AC010327.7	2.77134131087263e-06	0.00508738	0.012	0.004	0.0876575	NA
AC010327.8	0.000350517	0.00603919	0.013	0.006	1	NA
AC010328.1	0.0282912	0.000978416	0.001	0	1	NA
AC010329.1	0.272957	0.000605387	0	0	1	NA
AC010331.1	4.31776750230673e-08	-0.0036384	0.002	0.011	0.00136571	NA
AC010332.3	0.0184519	-0.000924959	0.004	0.008	1	NA
AC010333.1	0.0575308	0.00033013	0.001	0	1	NA
AC010333.2	0.785882	0.00111794	0.004	0.004	1	NA
AC010335.1	1	0	0	0	1	NA
AC010336.1	0.196299	0.0011678	0.003	0.002	1	NA
AC010336.4	1	0	0	0	1	NA
AC010336.6	0.0214448	-0.00171683	0.001	0.003	1	NA
AC010336.8	0.398748	-0.000994828	0.007	0.006	1	NA
AC010343.3	0.769505	0.0185126	0.05	0.049	1	NA
AC010359.2	0.954568	0.00023122	0.001	0.001	1	NA
AC010359.3	0.00199509	0.00514041	0.047	0.034	1	NA
AC010378.2	1	0	0	0	1	NA
AC010395.1	0.0141965	0.00190465	0.001	0	1	NA
AC010401.1	0.114181	-0.000279668	0	0.001	1	NA
AC010401.2	0.120997	0.000389051	0	0	1	NA
AC010420.1	0.808454	7.1192276126056e-05	0	0.001	1	NA
AC010422.1	0.208926	0.000527895	0.002	0.004	1	NA
AC010422.2	0.0321035	0.00254797	0.005	0.002	1	NA
AC010422.4	0.00722117	0.000962742	0.001	0	1	NA
AC010422.7	1	0	0	0	1	NA
AC010442.1	0.0509783	0.000968148	0.002	0	1	NA
AC010451.1	0.00132089	0.00481068	0.003	0	1	NA
AC010457.1	0.0575308	0.00116489	0.001	0	1	NA
AC010463.3	0.848857	0.000135501	0.001	0.002	1	NA
AC010468.2	1	0	0	0	1	NA
AC010476.2	1.40009491446054e-20	0.0457285	0.092	0.045	4.42850021443867e-16	NA
AC010487.2	1	0	0	0	1	NA
AC010491.1	3.26863954539136e-05	-0.00563542	0.011	0.022	1	NA
AC010491.2	0.0745544	0.00397148	0.007	0.005	1	NA
AC010494.1	1	0	0	0	1	NA
AC010501.2	0.00391029	-0.000793588	0	0.002	1	NA
AC010503.1	1	0	0	0	1	NA
AC010504.1	0.0028689	0.00685505	0.017	0.01	1	NA
AC010511.1	0.00208773	0.00519083	0.005	0.002	1	NA
AC010519.1	2.98576471137499e-18	0.0204184	0.034	0.008	9.4439737820791e-14	NA
AC010524.1	5.92371719180985e-10	-0.00520084	0.003	0.015	1.87367174776946e-05	NA
AC010528.1	0.00244736	0.00336801	0.003	0	1	NA
AC010528.2	0.120997	0.000823787	0	0	1	NA
AC010530.1	0.00265321	0.00353098	0.007	0.003	1	NA
AC010531.3	0.200268	-0.00188013	0.002	0.003	1	NA
AC010531.4	0.0282912	0.000730863	0.001	0	1	NA
AC010531.5	0.000281671	-0.00403873	0.005	0.013	1	NA
AC010531.6	0.00230373	-0.00150182	0.001	0.005	1	NA
AC010536.1	0.00370924	0.00116897	0.002	0	1	NA
AC010536.2	0.0575308	0.000303739	0.001	0	1	NA
AC010538.1	7.73650436928158e-09	0.00686309	0.01	0.001	0.000244706	NA
AC010542.2	6.91850182771095e-05	-0.00167208	0	0.004	1	NA
AC010542.4	0.00191944	0.00261109	0.002	0	1	NA
AC010542.5	1	0	0	0	1	NA
AC010547.1	0.00529157	0.00438419	0.009	0.004	1	NA
AC010547.3	0.120997	0.00027956	0	0	1	NA
AC010601.1	1.76096305373228e-05	0.00628443	0.006	0.001	0.556993	NA
AC010609.1	0.18848	0.00221783	0.003	0.002	1	NA
AC010615.2	0.190807	-0.00206835	0.009	0.012	1	NA
AC010618.2	0.547573	0.000131009	0.001	0.001	1	NA
AC010618.3	0.00407971	0.0174655	0.128	0.113	1	NA
AC010623.1	0.59121	0.000468999	0.008	0.009	1	NA
AC010624.1	0.0699192	0.000437573	0.006	0.004	1	NA
AC010624.3	0.120997	0.000832748	0	0	1	NA
AC010624.5	0.152259	-0.000494484	0.011	0.014	1	NA
AC010632.1	0.0378988	0.00249993	0.034	0.043	1	NA
AC010632.2	0.01756	0.00658326	0.03	0.023	1	NA
AC010634.1	0.272957	0.000359105	0	0	1	NA
AC010636.1	1	0	0	0	1	NA
AC010638.1	1.6316240371291e-06	-0.00662776	0.011	0.024	0.0516083	NA
AC010641.2	0.0172998	0.00224499	0.003	0.001	1	NA
AC010642.2	0.00051946	0.0132942	0.028	0.017	1	NA
AC010643.1	8.22312049820445e-07	0.00675356	0.006	0	0.0260097	NA
AC010649.1	0.0506377	0.000610618	0.002	0.001	1	NA
AC010654.1	0.185472	3.91245151901765e-05	0.002	0.004	1	NA
AC010677.2	6.04701588311656e-06	0.00573301	0.004	0	0.191267	NA
AC010680.1	3.30901238891181e-46	-0.132011	0.105	0.203	1.04664061861281e-41	NA
AC010680.2	2.48779499458147e-69	0.0632657	0.103	0.019	7.86889556786119e-65	NA
AC010680.3	9.66444538330261e-10	0.00977222	0.018	0.005	3.05686407473861e-05	NA
AC010680.4	0.150906	0.00511076	0.02	0.016	1	NA
AC010680.5	0.271003	-0.00114515	0.029	0.033	1	NA
AC010719.1	0.954795	0.000420997	0.001	0.001	1	NA
AC010727.1	0.511827	0.000991859	0.001	0	1	NA
AC010729.2	0.255554	-0.00102228	0.005	0.007	1	NA
AC010731.2	0.403285	-0.000104827	0.001	0.002	1	NA
AC010735.1	0.0321269	0.000678463	0.001	0	1	NA
AC010735.2	0.173874	0.00401066	0.021	0.017	1	NA
AC010737.1	0.00370924	0.000942381	0.002	0	1	NA
AC010745.2	0.00124805	0.00634775	0.005	0.002	1	NA
AC010745.5	0.0282912	0.00193108	0.001	0	1	NA
AC010746.2	1	0	0	0	1	NA
AC010754.1	0.00191944	0.00209452	0.002	0	1	NA
AC010761.1	0.00619848	-0.00085169	0	0.002	1	NA
AC010761.2	0.0684025	0.00227742	0.002	0.001	1	NA
AC010761.3	0.710532	0.000560235	0.002	0.002	1	NA
AC010761.4	1	0	0	0	1	NA
AC010768.1	1	0	0	0	1	NA
AC010768.2	1	0	0	0	1	NA
AC010776.1	0.00391029	-0.000798329	0	0.002	1	NA
AC010776.2	0.00247562	-0.0010609	0	0.002	1	NA
AC010776.3	0.000408185	-0.00159128	0	0.003	1	NA
AC010789.1	0.0152799	0.00163715	0.002	0	1	NA
AC010789.2	8.57429625184522e-05	0.0138925	0.026	0.015	1	NA
AC010809.1	1.44800366311303e-08	0.0142778	0.04	0.021	0.000458004	NA
AC010809.2	0.000132589	0.00882319	0.019	0.01	1	NA
AC010809.3	0.0222046	0.00118738	0.003	0.001	1	NA
AC010834.1	0.412524	2.00725685193799e-06	0	0.001	1	NA
AC010834.2	0.749359	-0.000630932	0.005	0.006	1	NA
AC010834.3	0.102885	0.00201409	0.009	0.006	1	NA
AC010864.1	0.673858	0.00107919	0.002	0.003	1	NA
AC010880.1	0.0252966	0.004589	0.005	0.003	1	NA
AC010883.1	0.00271488	0.00509035	0.006	0.002	1	NA
AC010883.2	0.120997	0.000885114	0	0	1	NA
AC010883.3	0.169808	0.00433099	0.023	0.019	1	NA
AC010884.1	0.67749	0.00763053	0.02	0.019	1	NA
AC010884.2	0.0575308	0.00103439	0.001	0	1	NA
AC010889.1	1.06730152540233e-12	0.00682397	0.01	0	3.37587472484757e-08	NA
AC010889.2	1.28925980624613e-22	0.0129009	0.018	0	4.07792876715652e-18	NA
AC010894.2	0.0103016	-0.000930867	0.001	0.004	1	NA
AC010894.3	0.000552953	0.0185851	0.028	0.018	1	NA
AC010894.4	1	0	0	0	1	NA
AC010896.1	0.00296678	0.00359168	0.007	0.003	1	NA
AC010904.2	0.0575308	0.000868337	0.001	0	1	NA
AC010907.2	0.0575308	0.000814526	0.001	0	1	NA
AC010913.1	0.114181	-0.000715525	0	0.001	1	NA
AC010931.2	0.11802	0.000848713	0.002	0.001	1	NA
AC010931.3	0.0087741	0.00303343	0.002	0	1	NA
AC010967.1	1.92184438885062e-39	-0.213781	0.096	0.188	6.07879380193451e-35	NA
AC010967.2	1	0	0	0	1	NA
AC010969.1	1	0	0	0	1	NA
AC010969.2	0.000937574	0.00430358	0.008	0.003	1	NA
AC010969.3	0.89644	-0.000311762	0	0	1	NA
AC010973.1	0.506097	0.000637189	0.003	0.002	1	NA
AC010973.2	0.117862	0.00134692	0.002	0.001	1	NA
AC010974.1	0.0575308	0.00175357	0.001	0	1	NA
AC010974.2	0.000433378	-0.00686082	0.044	0.062	1	NA
AC010975.1	0.272957	0.00012843	0	0	1	NA
AC010976.1	6.88664204084661e-05	-0.00296795	0.039	0.058	1	NA
AC010976.2	4.0609971013641e-08	-0.00615788	0.004	0.015	0.00128449	NA
AC010978.1	1.09272183261468e-07	-0.00429311	0.002	0.012	0.00345628	NA
AC010980.1	0.86089	0.00149482	0.002	0.002	1	NA
AC010983.1	0.120269	0.00116999	0.001	0	1	NA
AC010987.1	0.947439	-0.00100109	0.003	0.003	1	NA
AC010991.1	4.90362694293233e-07	0.0074361	0.005	0	0.0155102	NA
AC010996.1	0.308507	0.00123973	0.008	0.006	1	NA
AC010997.2	0.0681241	-0.000311128	0	0.001	1	NA
AC010997.3	0.000715976	0.00182764	0.018	0.028	1	NA
AC010997.4	0.208986	-0.000111765	0.002	0.004	1	NA
AC010997.5	8.15012984502956e-09	-0.00450714	0.001	0.01	0.000257789	NA
AC010998.1	0.283691	0.00133111	0.003	0.002	1	NA
AC010998.2	0.145219	-0.000113683	0.001	0.002	1	NA
AC010999.1	1	0	0	0	1	NA
AC010999.2	0.246308	-0.000157207	0	0.001	1	NA
AC011005.1	0.00722117	0.00208475	0.001	0	1	NA
AC011008.1	0.120997	0.00096881	0	0	1	NA
AC011029.1	5.263106537476e-11	0.0306787	0.028	0.01	1.66472059780366e-06	NA
AC011043.1	0.283475	0.00218445	0.031	0.035	1	NA
AC011043.2	0.272957	0.00046798	0	0	1	NA
AC011092.2	2.7679492683476e-24	-0.0279733	0.035	0.087	8.75502353578346e-20	NA
AC011092.3	4.98265232693168e-06	-0.00468586	0.005	0.014	0.157601	NA
AC011095.1	0.459735	0.00036354	0	0	1	NA
AC011124.1	0.00707471	0.00284783	0.003	0.001	1	NA
AC011124.2	0.0141965	0.00127796	0.001	0	1	NA
AC011131.1	0.120997	0.000694532	0	0	1	NA
AC011139.1	1	0	0	0	1	NA
AC011193.1	0.120997	0.000766284	0	0	1	NA
AC011228.2	0.0141965	0.00162421	0.001	0	1	NA
AC011233.2	0.272957	0.000373658	0	0	1	NA
AC011239.1	0.272957	0.000216874	0	0	1	NA
AC011243.1	0.327958	-0.000658228	0.001	0.001	1	NA
AC011246.1	9.86713305804312e-22	0.0412374	0.043	0.012	3.12097418625904e-17	NA
AC011247.1	0.253938	-0.000171204	0	0.001	1	NA
AC011257.1	0.0282912	0.00110232	0.001	0	1	NA
AC011284.1	0.0575308	0.00042733	0.001	0	1	NA
AC011287.1	1.01619373239184e-35	0.10038	0.956	0.9	3.2142207755554e-31	NA
AC011287.2	4.60613828772972e-05	-0.000795008	0.022	0.036	1	NA
AC011290.1	0.318188	0.00376623	0.013	0.011	1	NA
AC011294.1	0.00532899	0.00771413	0.009	0.004	1	NA
AC011298.1	1	0	0	0	1	NA
AC011306.1	3.57874957233883e-11	0.0124419	0.014	0.002	1.13195848973077e-06	NA
AC011313.1	0.0575308	0.00122523	0.001	0	1	NA
AC011317.1	0.55564	0.000894445	0.003	0.004	1	NA
AC011322.1	0.330834	0.000895171	0.001	0.001	1	NA
AC011330.2	0.00833389	0.00184839	0.006	0.003	1	NA
AC011337.1	0.996304	0.000694768	0.001	0.001	1	NA
AC011346.1	4.33773046530714e-114	0.262326	0.651	0.381	1.37202414617665e-109	NA
AC011351.1	0.391137	0.00135222	0.029	0.032	1	NA
AC011352.1	0.0141965	0.000773467	0.001	0	1	NA
AC011362.1	0.0282912	0.0022344	0.001	0	1	NA
AC011363.1	1	0	0	0	1	NA
AC011365.1	0.264926	0.00234407	0.002	0.001	1	NA
AC011365.2	0.0282912	0.0015721	0.001	0	1	NA
AC011369.1	5.15692047919795e-07	-0.0525562	0.151	0.188	0.0163113	NA
AC011370.1	1	0	0	0	1	NA
AC011373.1	1	0	0	0	1	NA
AC011374.1	0.120997	0.000556629	0	0	1	NA
AC011374.2	1	0	0	0	1	NA
AC011374.3	1	0	0	0	1	NA
AC011377.1	0.539412	0.00156194	0.002	0.001	1	NA
AC011379.1	0.00104268	-0.00544422	0.053	0.039	1	NA
AC011379.2	0.0543685	0.00297534	0.005	0.003	1	NA
AC011383.1	6.18099996428286e-12	-0.0127715	0.011	0.032	1.95505028870267e-07	NA
AC011389.1	0.367336	0.00158051	0.002	0.001	1	NA
AC011389.2	1	0	0	0	1	NA
AC011396.2	0.000139121	0.00620224	0.006	0.001	1	NA
AC011405.1	8.07256569703639e-05	-0.00125207	0.019	0.032	1	NA
AC011407.1	1.78642732327659e-05	0.0054026	0.005	0	0.565047	NA
AC011416.3	0.00452454	0.00252801	0.004	0.001	1	NA
AC011416.4	0.00220091	0.0039078	0.003	0.001	1	NA
AC011442.1	0.0806869	-2.04657e-05	0.002	0.004	1	NA
AC011443.1	0.000622214	-0.00189647	0.002	0.007	1	NA
AC011444.1	1.04506661482422e-06	7.53042398065531e-05	0.012	0.026	0.0330555	NA
AC011444.2	0.347495	0.00361191	0.013	0.011	1	NA
AC011444.3	0.133545	0.00285449	0.008	0.006	1	NA
AC011445.1	1	0	0	0	1	NA
AC011445.2	0.99692	0.000345319	0.001	0.001	1	NA
AC011446.1	0.00191944	0.00209919	0.002	0	1	NA
AC011446.2	1	0	0	0	1	NA
AC011446.3	1	0	0	0	1	NA
AC011447.3	0.0358547	0.0202515	0.053	0.045	1	NA
AC011450.1	0.30703	0.00182888	0.008	0.006	1	NA
AC011451.1	0.114181	-0.000280449	0	0.001	1	NA
AC011451.3	0.0498496	0.012934	0.058	0.05	1	NA
AC011451.4	0.0141965	0.000926547	0.001	0	1	NA
AC011453.1	1	0	0	0	1	NA
AC011455.1	0.00191944	0.00248221	0.002	0	1	NA
AC011455.6	0.567418	0.00386413	0.01	0.011	1	NA
AC011461.1	0.892365	1.54953776199532e-05	0.001	0.001	1	NA
AC011462.3	0.0575308	0.000559093	0.001	0	1	NA
AC011462.4	0.158851	0.000964519	0.004	0.003	1	NA
AC011462.5	0.0034765	-0.00207056	0.002	0.006	1	NA
AC011466.1	0.21696	0.000864226	0.006	0.009	1	NA
AC011466.2	0.114181	-0.000262924	0	0.001	1	NA
AC011466.3	0.439022	0.00189957	0.002	0.003	1	NA
AC011467.1	0.00061521	-0.00261618	0.002	0.007	1	NA
AC011468.1	0.074668	0.00216248	0.004	0.002	1	NA
AC011468.3	0.120997	0.000669951	0	0	1	NA
AC011468.5	2.21778435420456e-11	-0.00601066	0.004	0.019	7.01485191234904e-07	NA
AC011471.2	0.00146261	-0.00125106	0	0.004	1	NA
AC011472.1	1.01104264821417e-08	0.0247395	0.106	0.074	0.000319793	NA
AC011472.2	2.68027944030847e-05	0.00512287	0.007	0.002	0.847772	NA
AC011472.3	1	0	0	0	1	NA
AC011472.4	0.00601611	0.0033162	0.014	0.008	1	NA
AC011473.1	0.512564	-0.000130037	0.001	0	1	NA
AC011473.3	0.361881	-6.62376e-05	0	0	1	NA
AC011474.1	0.0004573	0.0085215	0.008	0.003	1	NA
AC011476.3	8.07911595534371e-05	0.0136871	0.054	0.038	1	NA
AC011477.2	0.0227103	0.00607296	0.022	0.015	1	NA
AC011477.3	0.155802	-0.000293226	0.001	0.002	1	NA
AC011477.8	0.000144397	0.0021962	0.003	0	1	NA
AC011477.9	5.84542351360593e-06	-0.00561857	0.03	0.049	0.184891	NA
AC011478.1	0.954908	0.00136978	0.001	0.001	1	NA
AC011479.2	0.00438967	-0.000145214	0.006	0.002	1	NA
AC011479.3	3.33827690082761e-05	0.00356107	0.005	0.001	1	NA
AC011481.1	0.183266	0.00619505	0.014	0.011	1	NA
AC011481.2	0.179955	0.00130025	0.003	0.001	1	NA
AC011483.1	0.00021008	0.00449463	0.008	0.003	1	NA
AC011483.2	0.00191944	0.00271703	0.002	0	1	NA
AC011484.1	0.272957	0.000521328	0	0	1	NA
AC011491.3	0.0255773	0.00369871	0.005	0.003	1	NA
AC011495.2	0.0681241	-0.000341312	0	0.001	1	NA
AC011495.3	1	0	0	0	1	NA
AC011498.1	0.176528	0.00397777	0.012	0.01	1	NA
AC011498.3	1	0	0	0	1	NA
AC011498.6	0.0141965	0.000917293	0.001	0	1	NA
AC011503.1	0.0974509	0.00415928	0.002	0.001	1	NA
AC011503.2	0.361881	-5.34031e-05	0	0	1	NA
AC011503.4	0.272957	0.000199728	0	0	1	NA
AC011507.1	0.00132343	0.00475851	0.003	0	1	NA
AC011509.2	1.82719722153143e-05	0.00821962	0.011	0.004	0.577942	NA
AC011509.3	0.0141965	0.00174896	0.001	0	1	NA
AC011510.1	1	0	0	0	1	NA
AC011511.2	0.900742	0.00395769	0.008	0.008	1	NA
AC011511.3	0.0681241	-0.000419986	0	0.001	1	NA
AC011511.5	0.0575308	0.00101555	0.001	0	1	NA
AC011516.1	0.120997	0.000390706	0	0	1	NA
AC011523.1	0.0141965	0.00151395	0.001	0	1	NA
AC011524.1	0.0413869	-0.000385984	0	0.001	1	NA
AC011524.2	1.49830308213439e-15	-0.00907811	0.003	0.023	4.73913264879108e-11	NA
AC011525.1	0.120997	0.00112697	0	0	1	NA
AC011586.1	0.0604664	0.00227663	0.003	0.001	1	NA
AC011586.2	3.40939907405521e-10	0.0204513	0.017	0.004	1.07839292712366e-05	NA
AC011591.1	1	0	0	0	1	NA
AC011593.1	0.00461016	0.002195	0.002	0	1	NA
AC011595.1	0.000306819	-0.00146351	0.002	0.008	1	NA
AC011595.2	0.0282912	0.000889357	0.001	0	1	NA
AC011603.1	1	0	0	0	1	NA
AC011603.2	4.10684259683988e-45	0.0916656	0.189	0.093	1.29899431338045e-40	NA
AC011611.3	1	0	0	0	1	NA
AC011611.4	0.253859	-0.000279386	0	0.001	1	NA
AC011625.1	0.0678539	0.000175529	0.004	0.007	1	NA
AC011632.1	0.242268	0.00133084	0.002	0.001	1	NA
AC011632.2	0.120997	0.00104114	0	0	1	NA
AC011676.1	0.000215401	0.00292122	0.007	0.002	1	NA
AC011676.2	0.330834	0.000899044	0.001	0.001	1	NA
AC011676.3	0.679189	-0.000100777	0.002	0.002	1	NA
AC011700.1	3.75513385570956e-09	0.012452	0.02	0.007	0.000118775	NA
AC011726.2	7.35645956157535e-05	0.00267171	0.009	0.003	1	NA
AC011726.3	0.0141965	0.000801083	0.001	0	1	NA
AC011731.1	1	0	0	0	1	NA
AC011747.1	0.0575308	0.00135826	0.001	0	1	NA
AC011751.1	0.0655302	0.00170948	0.006	0.003	1	NA
AC011752.1	1	0	0	0	1	NA
AC011753.2	4.0349526744535e-05	0.00286563	0.003	0	1	NA
AC011754.1	0.120997	0.00143134	0	0	1	NA
AC011754.2	0.0602766	0.00245971	0.003	0.001	1	NA
AC011773.1	1	0	0	0	1	NA
AC011773.2	0.0141965	0.000734019	0.001	0	1	NA
AC011773.3	2.68903166726918e-06	-0.00156663	0.007	0.019	0.0850541	NA
AC011773.4	0.11293	0.00100542	0.014	0.019	1	NA
AC011815.1	0.055011	0.00577776	0.022	0.017	1	NA
AC011815.2	6.54644186524263e-05	-0.0064753	0.011	0.022	1	NA
AC011816.2	0.114181	-0.000255855	0	0.001	1	NA
AC011824.1	1	0	0	0	1	NA
AC011824.2	0.0321658	0.0018326	0.001	0	1	NA
AC011825.2	0.311499	-0.000339255	0.006	0.008	1	NA
AC011825.4	0.74819	0.000532744	0.001	0.001	1	NA
AC011840.1	1	0	0	0	1	NA
AC011841.1	0.998583	-0.00257595	0.002	0.002	1	NA
AC011853.2	0.120997	0.000953162	0	0	1	NA
AC011897.1	0.00191944	0.00280245	0.002	0	1	NA
AC011899.2	1	0	0	0	1	NA
AC011899.4	1	0	0	0	1	NA
AC011900.1	7.62423916342945e-05	0.00626655	0.003	0	1	NA
AC011901.1	0.0167787	0.00206557	0.002	0	1	NA
AC011912.1	0.117893	0.00101681	0.002	0.001	1	NA
AC011921.1	7.3139738701104e-08	0.0185616	0.041	0.022	0.00231341	NA
AC011933.2	0.128362	0.00189528	0.006	0.004	1	NA
AC011933.3	0.00391029	-0.000705263	0	0.002	1	NA
AC011933.4	1.14979205810009e-22	-0.017208	0.017	0.056	3.63679227977059e-18	NA
AC011939.2	0.000384799	0.00921152	0.019	0.011	1	NA
AC011939.3	0.00370924	0.00113303	0.002	0	1	NA
AC011944.1	0.272957	0.000545954	0	0	1	NA
AC011978.2	0.865023	8.38259199165631e-05	0.004	0.003	1	NA
AC011990.1	0.00319955	0.00253031	0.006	0.002	1	NA
AC011995.2	0.00913763	0.00408257	0.007	0.012	1	NA
AC011997.1	1.39441329959401e-26	0.0630201	0.168	0.098	4.41052926661584e-22	NA
AC011997.2	7.92156045165554e-09	-0.0304218	0.078	0.115	0.000250559	NA
AC012020.1	3.27332607065741e-08	0.0155688	0.034	0.017	0.00103535	NA
AC012038.1	0.205784	-0.000445893	0.001	0.002	1	NA
AC012038.2	0.109555	0.000727593	0.003	0.001	1	NA
AC012050.1	1	0	0	0	1	NA
AC012055.1	0.808307	5.48332345929849e-05	0	0.001	1	NA
AC012060.1	2.46950485896537e-05	-0.00796636	0.011	0.023	0.781104	NA
[truncated: 28,845 more rows]

## Sheet: Supplemental Table 5D
Gene	2n	4n	>4n
FBXO42	1.44103	2.1956	2.71492
FYB2	1.96844	2.59893	3.63391
SGIP1	0.198828	0.0793735	0.87482
SLC16A1-AS1	1.63459	2.97717	3.5475
GABPB2	0.638066	1.35704	1.69052
PIP5K1A	1.00392	1.36773	1.92322
GATAD2B	1.32285	1.65978	2.04258
AC119673.2	0.0617269	0.0356467	1.30425
SMYD2	2.17382	2.50107	3.15225
PTPN14	0.995731	1.18021	1.44967
TOGARAM2	1.02906	0.995921	1.7234
LINC00211	0.110751	0.145406	0.510975
PSME4	1.77359	1.97562	2.81943
ACYP2	3.75014	4.68911	6.64384
COMMD1	1.71228	1.99468	2.51322
AC098617.1	2.89036	3.66559	4.68654
AC005037.1	0.429541	0.527405	1.22067
RAMP1	1.53637	2.02342	2.45171
HDAC4	2.22269	2.8198	3.83349
NDUFA10	1.61659	2.00919	2.36263
SUMF1	1.33766	1.54796	1.94436
ARIH2	1.4194	1.77189	2.24452
DOCK3	2.11438	2.49173	3.18382
CACNA2D3	1.92389	2.40205	2.79675
FLNB	0.380262	0.238024	0.833711
WWTR1	1.00086	1.02589	1.7292
DGKG	1.61285	2.48283	4.94142
FAM193A	0.934389	1.38956	1.67529
LINC02506	2.11231	1.62637	0.139593
UBA6-AS1	0.449299	0.474262	1.51713
AC073475.1	1.96602	2.4713	3.54538
STOX2	1.24479	0.944118	2.21918
AC124852.1	0.887698	1.1226	1.62078
AC008571.2	1.32825	1.61217	3.43294
LARP1	1.40359	2.17549	2.52804
CAP2	2.22217	2.66786	3.38232
CPNE5	0.615326	0.668605	1.72074
DSE	1.02032	1.04738	1.63399
EYA4	2.73763	2.36372	4.29796
AL078590.2	0.461587	0.373807	1.55673
TIAM2	1.87586	2.2087	2.88909
AL078604.4	0.519931	0.594893	1.08969
COBL	1.15232	1.42115	1.84747
RABGEF1	0.923276	1.30995	1.56953
GTF2IRD1	1.40835	2.59109	3.00201
PDK4	0.751835	0.792542	1.1666
DYNC1I1	1.90195	2.07973	3.6821
AC018464.1	2.48947	2.40349	3.75084
AZIN1-AS1	0.667021	1.00589	1.31689
TMEM71	3.43405	3.13967	5.23876
RFX3-AS1	0.750075	0.915939	1.22926
UBE2R2	2.0615	3.2569	3.90929
RMRP	0.334204	0.88004	1.31968
CENPP	0.565615	0.659831	1.01351
PALM2-AKAP2	4.16177	4.96652	6.25297
HACD1	1.67202	1.98628	2.54948
VCL	2.79877	3.05588	4.0642
ENTPD1-AS1	1.20496	1.31538	2.09798
KCNIP2	0.812727	1.06699	1.34773
ARMH3	2.4985	3.02322	3.61383
ATRNL1	0.0893635	0.110149	0.579035
MARK2	0.833938	1.13314	1.43483
KDM2A	1.6371	2.1386	2.52041
GRAMD1B	3.88454	5.09624	7.28122
IGSF9B	0.948717	1.31199	1.74018
SLC38A1	1.93193	2.14803	3.09108
ADCY6	0.839438	1.00286	1.38884
TFCP2	1.05889	1.37949	1.77823
R3HDM2	2.75906	3.69576	4.445
RASSF3	0.730496	0.717562	1.22989
LINC02822	0.020885	0.00990045	0.825695
AC138123.1	0.590753	0.648679	1.47407
AC124947.1	0.578652	0.578321	1.12621
ADGRD1	1.11356	1.33422	1.92404
AL158038.1	0.674974	0.640716	1.47856
DPF3	5.07311	6.44902	8.71754
DGLUCY	3.4623	4.02113	5.31081
MARK3	2.74973	3.01552	4.05041
DPH6-DT	2.27347	2.37727	3.92102
DAPK2	2.68897	4.02325	5.19425
ABHD2	1.47093	1.85198	2.40353
PCSK6	0.802342	1.08002	1.41484
ARHGAP17	1.18871	1.15639	2.08623
NDRG4	2.03291	2.93737	3.43253
AC106793.1	0.882355	1.02965	2.23098
AC040174.1	1.49588	1.47816	2.47832
AC009120.2	0.879207	1.35382	1.65712
UBE2G1	1.50088	1.83802	2.44315
CCDC144A	0.593443	0.951273	1.25579
MYO18A	1.58432	2.19906	2.55704
FBXL20	1.36147	1.97546	2.61719
MPP3	1.5816	2.37989	3.1747
GREB1L	1.52745	1.82929	2.56087
CHST9	0.686904	1.18292	1.84783
MAPK4	0.831922	1.09854	1.87645
KDM4B	1.12521	1.65327	1.95334
DNM2	1.05347	1.77802	2.09584
SCGB2B2	0.723236	0.94811	1.30176
PLA2G4C	0.619324	0.919897	1.20253
ZNF586	1.15777	1.5896	2.32989
ZNF587B	0.518624	0.716076	0.988985
LINC01428	1.58996	2.53948	3.07137
CFAP61	1.53623	2.53075	3.1965
SYNDIG1	1.18353	1.33821	2.29244
PHF20	0.927661	1.30196	1.66677
NCOA3	1.51066	1.9935	2.34948
MIR646HG	5.15362	5.93808	8.87055
AF165147.1	0.659904	0.784216	2.26962
EVA1C	0.558677	0.601869	0.944587
BCL2L13	0.84366	1.11495	1.4913
Z93930.2	0.590355	0.911984	1.26141
MRTFA	1.4316	1.72821	2.09524
CSDC2	0.835805	1.42149	1.87388
PPARA	1.52983	2.22522	2.70504
XIST	8.90112	8.3256	3.54324
FHL1	1.72059	1.89276	2.74919
PRKY	0.0010443	0.00266497	0.419377
USP9Y	0.00500489	0.00452998	1.74855
UTY	0.00036412	0	1.70844
TTTY14	0.00237105	0.00506707	4.15693
TTTY10	0.0105304	0.00334417	3.0611
MT-ND1	19.268	12.1885	4.78661
MT-ND2	14.9968	7.44123	4.29869
MT-CO1	7.4775	8.03309	2.93812
MT-CO2	17.3116	16.9997	6.37389
MT-ATP8	3.44875	3.83845	0.827627
MT-ATP6	40.9764	33.383	11.473
MT-CO3	25.1697	25.2424	9.17038
MT-ND4L	3.28044	2.20426	0.83583
MT-ND4	22.6627	13.407	5.86416
MT-ND5	5.57143	3.66771	1.27361
MT-CYB	23.6736	18.8083	6.04847
KDM5D	0	0	0.291596

## Sheet: Supplemental Table5E
Gene	2n	4n	>4n
NEGR1	1.01939	0.161325	0.173947
S100A1	0.973608	0.372587	0.217161
RPS27	1.22183	0.4075	0.185886
IPO9-AS1	1.78912	0.754355	0.133078
SLC8A1-AS1	3.44206	1.47319	0.496094
RPS27A	0.891382	0.233406	0.0851973
MDH1	2.52653	1.56787	1.22041
COX5B	0.975205	0.37763	0.220756
SCN7A	0.796653	0.104318	0.0545105
ATP5MC3	0.976583	0.407594	0.255266
TTN-AS1	13.352	4.60054	2.54235
AC010680.1	1.27223	0.256799	0.0732874
AC092640.1	1.07994	0.382552	0.147543
RPL37A	1.51404	0.595649	0.322651
TNNC1	3.34896	1.92014	1.19821
MECOM	0.847139	0.122403	0.0611267
APOD	0.761488	0.0692854	0.0203939
RPL35A	0.945652	0.338799	0.130584
LDB2	0.882066	0.0898091	0.0617136
ADGRL3	1.58281	0.728301	0.303192
SPARCL1	1.35762	0.242691	0.0732124
DDX60L	1.20986	0.584698	0.316315
SLC25A4	3.10252	2.03594	1.0186
AC108472.1	0.648973	0.186703	0.0943671
C7	0.864786	0.0659801	0.0335222
AC092353.1	1.20595	0.542331	0.320485
RPS23	1.02024	0.297218	0.10724
COX7C	1.06188	0.431682	0.178581
EGR1	1.44139	0.609509	0.280347
PRELID2	4.06338	8.1793	7.60058
GRXCR2	1.4017	2.9627	2.51558
RPS14	1.04452	0.281074	0.0918413
EBF1	0.888381	0.0749458	0.0600878
RPS18	1.02326	0.242981	0.0873534
MLIP-AS1	1.12211	0.484167	0.183892
EEF1A1	0.879499	0.148696	0.0643812
GRIK2	1.69522	0.558331	0.413327
PLN	5.56421	3.05607	2.25664
RPS12	0.953022	0.225649	0.101429
NDUFA4	1.47901	0.583442	0.379057
AC005400.1	1.18373	0.485689	0.214227
MYL7	3.82859	1.94961	0.395228
GALNT17	5.69527	10.0079	12.3855
FOXP2	1.57378	0.822415	0.488443
AC009264.1	1.70952	0.800456	0.467738
LPL	7.00956	11.5563	9.5354
PEBP4	2.30053	4.30567	4.09843
RPS20	0.907376	0.230626	0.131838
RALYL	2.78113	5.20187	5.65347
UQCRB	1.36861	0.697768	0.327838
ZFPM2-AS1	1.1164	0.471847	0.228257
COL15A1	0.823981	0.0794745	0.0712878
GSN	2.0997	0.815605	0.757717
PLXDC2	0.825295	0.185819	0.106161
LRRTM3	2.40236	1.0576	0.392093
PPP1R3C	2.83509	1.5386	1.12986
FTH1	1.54361	0.599729	0.190253
FAU	0.82176	0.20442	0.0762789
MAML2	0.849651	0.132669	0.124234
CRYAB	4.46296	2.29909	1.50824
DCP1B	0.882487	0.326497	0.146495
A2M	1.06754	0.381226	0.215197
MGP	1.71817	0.0823094	0.0394814
SOX5	2.83563	0.994072	0.114212
RPL41	2.13002	0.575927	0.229915
DCN	2.15533	0.203714	0.116297
FLT1	0.696802	0.0815099	0.0626943
FOS	1.84459	0.749722	0.306081
ACTC1	6.1628	3.44638	2.14004
B2M	1.30037	0.154839	0.0939083
RPLP1	2.30749	1.14999	1.20522
AC087286.2	0.987612	0.414374	0.0884328
RPS2	1.09897	0.348678	0.163227
COX6A2	2.37687	1.39162	0.65121
COX4I1	1.72831	0.742871	0.345636
RPL13	1.73087	0.691395	0.466653
EIF1	1.0515	0.405735	0.19536
TCF4	1.51821	0.414258	0.280739
CFD	0.949068	0.0352019	0.0189542
RPS15	0.889176	0.210275	0.119044
GNG7	2.09283	3.92714	4.02588
CERS4	0.790533	1.91552	1.9303
RPS28	1.43276	0.456431	0.12272
RPS16	1.16357	0.362232	0.157848
HIF3A	2.20065	4.04308	3.4201
FTL	0.819985	0.161296	0.0924124
RPL13A	1.66255	0.620973	0.457326
RPS11	0.894215	0.131443	0.0841974
CST3	1.09512	0.124654	0.080446
MIR1-1HG	3.9784	9.63382	6.27714
LGALS1	0.726385	0.095039	0.0573005
TSIX	0.522225	0.0986087	0.021787
RPL10	1.62036	0.426484	0.201286
