# Supplementary material for: Single-nucleus multi-omic profiling of polyploid heart nuclei identifies fusion-derived cardiomyocytes in the human heart.
Source: Research Square preprint supplement (doi:10.21203/rs.3.rs-4414468/v1), 2024-05-30
Supplement: Supplementary file 5 [file b63bdca3375303eafdfad47c.xlsx]

## Sheet: Sheet1
Case ID	Age (yr)	Sex	RIN	Diagnosis	Cause of Death / Clinical History	Experimental details	Height (inch)	HW (gm)	BW (lb.)
S1	15	Female	N/A	Unaffected Control	Accident, Multiple Injuries	Multiome	60-70	270	145-155
S2	17	Male	9.1	Unaffected Control	Accident, Multiple Injuries	RNAseq + amplicon	65-70	300	150-160
S3	43	Male	7.5	Unaffected Control	Accident, Multiple Injuries	Multiome	70-80	370	180
S4	44	Male	8.1	Unaffected Control	Heroin intoxication	RNAseq	65-75	285	175-185
S5	45	Female	N/A	Unaffected Control	Gastrointestinal Hemorrhage	RNAseq	65-75	280	180-190
S6	48	Male	N/A	Unaffected Control	Subarachnoid Hemorrhage	RNAseq	70-80	300	175-185
S7	49	Female	7.8	Unaffected Control	Cirrhosis of the Liver	RNAseq	60-70	280	150-160
S8	63	Male	6.1	Unaffected Control	Drowning	Multiome	65-75	430	185-195
S9	63	Female	6.2	Unaffected Control	Asthama	RNAseq	70-80	340	170-180
S10	66	Male	8.2	Unaffected Control	Accident, Multiple Injuries	Multiome, CNV analysis	60-65	320	140-150
S11	49	Male	7.4	Unaffected Control	Accident, Multiple Injuries	CNV analysis	65-75	275	150-160
