# Supplementary material for: Single-nucleus multi-omic profiling of polyploid heart nuclei identifies fusion-derived cardiomyocytes in the human heart.
Source: Research Square preprint supplement (doi:10.21203/rs.3.rs-4414468/v1), 2024-05-30
Supplement: Supplementary file 6 [file e6ca3c7ac6bfe0f4676887eb.xlsx]

## Sheet: Supplementary Table7A1
gene	p_val	avg_log2FC	pct.1	pct.2	p_val_adj
XAF1	2.47e-36	1.53036	0.476	0.058	9.05e-32
TPO	6.72e-33	1.46715	0.321	0.024	2.46e-28
EFNB2	1.94e-31	1.62486	0.417	0.051	7.1e-27
PLCB1	1.99e-31	2.24137	0.762	0.254	7.28e-27
RASGRF2	3.26e-31	1.40172	0.488	0.072	1.19e-26
ELMO1	1.16e-30	1.90732	0.667	0.159	4.24e-26
ST8SIA6	2.16e-29	1.66666	0.488	0.083	7.92e-25
APBB2	1e-28	1.67254	0.702	0.192	3.67e-24
DACH1	1.16e-28	2.1341	0.619	0.153	4.26e-24
ITGA1	6.5e-28	1.78303	0.643	0.167	2.38e-23
CYYR1	4.96e-26	1.57312	0.452	0.076	1.81e-21
PDGFB	7.62e-26	1.0331	0.274	0.023	2.79e-21
BTNL9	1.05e-25	1.9822	0.488	0.098	3.83e-21
ADGRF5	1.53e-25	1.48736	0.512	0.107	5.6e-21
LDB2	2.48e-25	2.34802	0.762	0.297	9.08e-21
CCDC85A	3.08e-25	1.65943	0.488	0.096	1.13e-20
ANO2	3.67e-25	2.05457	0.619	0.17	1.34e-20
ADGRL4	8.29e-25	1.56617	0.464	0.087	3.03e-20
PLEKHG1	1.43e-24	1.75293	0.524	0.115	5.24e-20
TACC1	2e-24	1.53533	0.726	0.228	7.31e-20
CLMN	6.63e-24	1.31187	0.357	0.05	2.42e-19
MECOM	5.32e-23	2.68774	0.726	0.319	1.95e-18
FP671120.4	1.95e-22	0.750511	0.214	0.015	7.13e-18
PTPRB	8.83e-22	1.26404	0.464	0.096	3.23e-17
VWF	1.34e-21	1.81381	0.607	0.182	4.92e-17
ST6GALNAC3	3.77e-21	2.15142	0.583	0.183	1.38e-16
NEDD9	4.47e-21	1.56976	0.524	0.131	1.64e-16
SHANK3	6.35e-21	1.14254	0.429	0.085	2.32e-16
KITLG	9.89e-21	1.31185	0.286	0.036	3.62e-16
AKT3	1.17e-20	1.48293	0.619	0.184	4.28e-16
UTRN	3.01e-20	1.60264	0.869	0.49	1.1e-15
RAPGEF1	8.25e-20	1.6055	0.69	0.275	3.02e-15
MAP2	4.48e-19	1.25427	0.298	0.044	1.64e-14
ERG	4.7e-19	1.13935	0.345	0.059	1.72e-14
PCED1B	6.51e-19	1.22814	0.262	0.034	2.38e-14
ST8SIA6-AS1	8.48e-19	0.515029	0.131	0.005	3.11e-14
PECAM1	1.33e-18	0.935111	0.369	0.068	4.86e-14
FLT1	2.03e-18	2.13054	0.679	0.287	7.43e-14
LNX1	2.27e-18	1.2137	0.238	0.028	8.32e-14
PLXNA2	3.6e-18	1.17424	0.44	0.102	1.32e-13
EMCN	4.74e-18	1.93154	0.56	0.188	1.74e-13
RAPGEF5	5.63e-18	1.43932	0.357	0.072	2.06e-13
NLRC5	5.91e-18	0.616776	0.179	0.014	2.16e-13
PPP1R16B	6.6e-18	0.932687	0.274	0.039	2.41e-13
LINC00639	6.73e-18	2.0245	0.405	0.096	2.46e-13
SLC2A3	1.71e-17	1.65184	0.381	0.085	6.27e-13
SLC9C1	1.77e-17	1.34093	0.333	0.063	6.47e-13
TEK	2.26e-17	1.07191	0.298	0.049	8.28e-13
NOTCH4	4.27e-17	0.963621	0.226	0.028	1.56e-12
CNOT6L	4.67e-17	1.18448	0.429	0.107	1.71e-12
TDRD10	5.61e-17	0.658031	0.155	0.01	2.05e-12
CPNE8	7.14e-17	1.15484	0.333	0.065	2.61e-12
LPAR6	8.82e-17	0.78772	0.298	0.05	3.23e-12
TCF4	1.39e-16	1.80865	0.738	0.399	5.1e-12
SHROOM4	1.85e-16	0.832939	0.333	0.063	6.77e-12
PTPN12	2.36e-16	1.26097	0.512	0.151	8.64e-12
F8	2.63e-16	1.2219	0.429	0.107	9.63e-12
GRB10	2.67e-16	1.34356	0.524	0.162	9.78e-12
GNAQ	2.77e-16	1.34589	0.512	0.155	1.01e-11
SRGAP2B	3.03e-16	0.532337	0.179	0.016	1.11e-11
FLI1	3.43e-16	1.15098	0.357	0.076	1.25e-11
APOL3	4.52e-16	0.538478	0.155	0.012	1.66e-11
TCF7L1	4.53e-16	1.02353	0.369	0.081	1.66e-11
AP001605.1	4.94e-16	0.673198	0.107	0.003	1.81e-11
VEGFC	5.71e-16	1.52002	0.345	0.075	2.09e-11
CCDC68	1.08e-15	0.675692	0.179	0.017	3.95e-11
CDK17	1.23e-15	1.06963	0.5	0.149	4.49e-11
PITPNC1	1.98e-15	1.48759	0.524	0.174	7.26e-11
AL139807.1	2.76e-15	0.6236	0.19	0.021	1.01e-10
ARHGAP29	2.8e-15	1.40625	0.56	0.207	1.02e-10
PLXND1	4.22e-15	0.822665	0.25	0.039	1.55e-10
ZBTB46	4.27e-15	0.947325	0.488	0.145	1.56e-10
EPAS1	4.38e-15	1.52049	0.607	0.246	1.6e-10
CADPS2	5.96e-15	1.20463	0.44	0.124	2.18e-10
MEOX2	6.09e-15	1.29191	0.333	0.075	2.23e-10
TTN	7.96e-15	-0.557768	1	1	2.91e-10
LINC01695	8.15e-15	1.27356	0.286	0.053	2.98e-10
PLXDC2	1.31e-14	1.62445	0.655	0.292	4.81e-10
EPHA4	1.97e-14	1.10873	0.333	0.073	7.2e-10
TMOD3	3.23e-14	0.964975	0.405	0.11	1.18e-09
EBF1	3.26e-14	1.48027	0.643	0.282	1.19e-09
CMTM8	5.01e-14	0.719251	0.25	0.043	1.83e-09
DOCK6	6.98e-14	0.85787	0.274	0.052	2.55e-09
CPAMD8	1.11e-13	0.619897	0.226	0.035	4.07e-09
RFTN1	1.16e-13	1.21125	0.429	0.122	4.23e-09
KLHL5	1.29e-13	0.772614	0.262	0.049	4.72e-09
LINC01697	1.33e-13	0.746668	0.167	0.019	4.86e-09
PRKCH	1.36e-13	1.29551	0.464	0.154	4.96e-09
PELI1	1.41e-13	1.18021	0.357	0.093	5.17e-09
SLC1A1	1.62e-13	0.490703	0.143	0.013	5.93e-09
CA8	1.92e-13	0.889822	0.262	0.05	7.04e-09
PREX2	1.93e-13	1.29415	0.464	0.147	7.06e-09
DCN	2.51e-13	-1.77204	0.06	0.491	9.18e-09
TMEM88	2.68e-13	0.625315	0.131	0.01	9.82e-09
ITPKB	2.69e-13	1.046	0.298	0.064	9.83e-09
PTMA	3.03e-13	0.986217	0.452	0.138	1.11e-08
AC007743.1	3.14e-13	0.327305	0.083	0.002	1.15e-08
TNNT2	3.44e-13	-0.758152	0.821	0.964	1.26e-08
A2M	3.53e-13	1.37169	0.583	0.233	1.29e-08
FUT8	3.67e-13	1.10894	0.429	0.131	1.34e-08
IFI44L	5.51e-13	0.869353	0.226	0.038	2.02e-08
MEF2C	5.52e-13	1.31258	0.762	0.401	2.02e-08
SLFN11	7.29e-13	0.702449	0.19	0.027	2.67e-08
STOM	7.65e-13	1.27648	0.5	0.182	2.8e-08
ALPL	8.76e-13	0.416775	0.143	0.014	3.21e-08
FARP1	1.08e-12	0.836965	0.31	0.072	3.96e-08
HMCN1	1.32e-12	1.51367	0.357	0.102	4.82e-08
SPATA13	1.32e-12	1.04721	0.25	0.049	4.85e-08
NLK	1.6e-12	1.00734	0.56	0.213	5.84e-08
SYNE2	1.98e-12	1.07562	0.702	0.384	7.26e-08
PRKD1	2.28e-12	1.35463	0.405	0.124	8.36e-08
CASC15	3.25e-12	1.07557	0.393	0.118	1.19e-07
ANXA3	5.26e-12	0.641308	0.214	0.037	1.93e-07
DIPK2B	5.55e-12	1.02788	0.31	0.078	2.03e-07
DNM3	6.51e-12	1.05704	0.345	0.095	2.38e-07
MYO1E	6.79e-12	1.04179	0.524	0.204	2.48e-07
LINC02328	8.25e-12	0.491935	0.131	0.013	3.02e-07
AC093110.1	8.53e-12	0.269579	0.083	0.003	3.12e-07
MYO10	9.21e-12	1.23077	0.262	0.058	3.37e-07
SP3	1.1e-11	0.907168	0.333	0.09	4.01e-07
DGKH	1.14e-11	1.13726	0.429	0.144	4.19e-07
FGD5	1.22e-11	1.00852	0.214	0.039	4.46e-07
MGLL	1.28e-11	1.4815	0.464	0.175	4.7e-07
PTPRM	1.32e-11	0.876267	0.964	0.905	4.84e-07
RBMS3	1.39e-11	1.03969	0.905	0.693	5.1e-07
AGRN	1.83e-11	0.377518	0.095	0.006	6.71e-07
ST8SIA4	2e-11	0.897484	0.214	0.039	7.32e-07
LRRC8C	2.03e-11	0.876848	0.262	0.059	7.43e-07
AC011407.1	2.05e-11	0.314235	0.095	0.006	7.52e-07
ITGA6	2.17e-11	1.11416	0.405	0.133	7.94e-07
PTGDR	3.85e-11	0.457016	0.071	0.002	1.41e-06
AL138689.2	3.92e-11	0.354681	0.071	0.002	1.43e-06
GULP1	4.43e-11	0.592957	0.202	0.036	1.62e-06
SRGN	5.86e-11	1.2007	0.321	0.087	2.14e-06
IFI44	7.54e-11	0.343848	0.167	0.024	2.76e-06
SEC14L1	7.7e-11	0.925705	0.393	0.125	2.82e-06
IFI27	7.72e-11	0.907029	0.286	0.072	2.82e-06
ADAM15	8.01e-11	0.414932	0.167	0.024	2.93e-06
NLRP1	8.78e-11	0.682081	0.226	0.046	3.21e-06
MYBPC3	9.34e-11	-0.644503	0.857	0.98	3.42e-06
EGFL7	9.8e-11	0.982504	0.393	0.13	3.59e-06
TDRP	1.03e-10	0.561696	0.107	0.009	3.76e-06
ETS1	1.14e-10	0.940691	0.393	0.125	4.17e-06
MDFIC	1.21e-10	0.783621	0.381	0.117	4.44e-06
SASH1	1.36e-10	1.00454	0.595	0.283	4.98e-06
EPB41L2	1.4e-10	1.30844	0.429	0.151	5.11e-06
NEXN	1.52e-10	-0.704399	0.857	0.969	5.55e-06
KANK3	1.55e-10	0.502797	0.167	0.025	5.67e-06
KIAA0355	1.84e-10	0.798726	0.405	0.134	6.73e-06
MYH7	1.84e-10	-0.656235	0.905	0.984	6.75e-06
STIM2	1.87e-10	0.894327	0.25	0.058	6.85e-06
ABCB1	1.92e-10	1.65797	0.274	0.072	7.04e-06
UACA	2.25e-10	0.963711	0.512	0.209	8.25e-06
PLSCR1	2.26e-10	0.681111	0.238	0.052	8.28e-06
HLA-E	2.34e-10	0.868113	0.405	0.139	8.56e-06
MT-ND1	2.42e-10	-0.683728	0.976	1	8.86e-06
FRYL	3e-10	1.08418	0.619	0.301	1.1e-05
RFX3	3.24e-10	0.886777	0.405	0.141	1.18e-05
SEMA6B	3.42e-10	0.431372	0.119	0.013	1.25e-05
TNNT3	3.49e-10	0.582577	0.155	0.023	1.28e-05
CDC37	3.54e-10	0.631029	0.238	0.053	1.3e-05
ZNF366	4.35e-10	0.594337	0.155	0.023	1.59e-05
CCDC107	4.36e-10	0.611926	0.143	0.02	1.59e-05
HBA2	4.61e-10	0.681433	0.25	0.059	1.69e-05
SHE	4.64e-10	0.55325	0.143	0.02	1.7e-05
DOCK9	4.78e-10	1.07211	0.512	0.214	1.75e-05
ZHX3	4.89e-10	0.838729	0.476	0.185	1.79e-05
NKTR	5.45e-10	0.84734	0.536	0.233	2e-05
GATA2-AS1	6.17e-10	0.443132	0.107	0.01	2.26e-05
C17orf67	6.17e-10	0.317089	0.107	0.01	2.26e-05
PIK3R3	6.6e-10	1.33484	0.5	0.221	2.42e-05
EPB41L4A	6.97e-10	0.950384	0.5	0.211	2.55e-05
ABLIM3	7.09e-10	1.40545	0.524	0.242	2.6e-05
ARHGAP6	7.48e-10	1.05925	0.274	0.074	2.74e-05
KL	8.75e-10	0.408529	0.071	0.003	3.2e-05
TCTEX1D1	9.17e-10	0.352473	0.071	0.003	3.36e-05
NCALD	9.19e-10	1.11247	0.595	0.301	3.36e-05
EHD2	1.08e-09	0.614296	0.274	0.071	3.95e-05
PPP3CA	1.14e-09	0.895807	0.488	0.204	4.16e-05
TINAGL1	1.29e-09	0.558155	0.214	0.046	4.72e-05
UBE2Q2	1.3e-09	0.574618	0.226	0.051	4.76e-05
NBL1	1.36e-09	0.509956	0.143	0.021	4.97e-05
RALGAPA2	1.58e-09	0.921821	0.571	0.257	5.8e-05
IQCK	1.63e-09	0.554272	0.202	0.042	5.97e-05
CACHD1	1.71e-09	0.746965	0.214	0.048	6.26e-05
MAML2	1.78e-09	1.31386	0.536	0.264	6.52e-05
MYO1B	1.88e-09	1.1054	0.262	0.07	6.9e-05
ENG	2.41e-09	0.877193	0.369	0.123	8.83e-05
GBP2	2.87e-09	0.41728	0.107	0.012	0.000104893
SPECC1	2.98e-09	0.633095	0.214	0.048	0.000109243
MRVI1	3.26e-09	0.695599	0.119	0.015	0.000119261
ADAMTS9	3.29e-09	1.1365	0.393	0.146	0.000120579
GALNT18	3.29e-09	1.0486	0.607	0.316	0.000120598
SPAAR	3.39e-09	0.333815	0.155	0.025	0.000123909
ECSCR	3.69e-09	0.429429	0.143	0.022	0.000135153
EEPD1	4.96e-09	0.798358	0.393	0.145	0.000181458
C22orf34	5.06e-09	0.438681	0.167	0.03	0.000185293
AC015631.1	6.41e-09	0.352308	0.095	0.009	0.000234754
ZEB1	6.46e-09	1.0503	0.774	0.51	0.000236341
NFKBIZ	7.28e-09	0.654484	0.226	0.056	0.000266543
PTK2	7.76e-09	0.829864	0.774	0.508	0.000283922
TMTC1	7.92e-09	0.907256	0.583	0.271	0.000289846
CNTNAP3B	8.07e-09	0.660975	0.19	0.041	0.000295517
BLZF1	8.97e-09	0.409448	0.167	0.031	0.000328152
CTTNBP2NL	9.26e-09	0.629769	0.262	0.072	0.000338945
CMIP	9.28e-09	0.918499	0.321	0.107	0.000339819
KLF7	9.6e-09	0.697235	0.452	0.174	0.000351204
CCM2L	9.72e-09	0.495854	0.107	0.013	0.000355658
LINC00342	9.83e-09	0.795573	0.345	0.117	0.000359613
ARL15	1.02e-08	1.51742	0.786	0.581	0.000372787
LRCH1	1.08e-08	0.852849	0.44	0.184	0.000395951
SRGAP2C	1.09e-08	0.430811	0.119	0.016	0.000397563
AL359220.1	1.16e-08	0.339406	0.071	0.005	0.000423747
FOXN3	1.17e-08	0.950972	0.81	0.583	0.000427337
CYTH3	1.25e-08	0.789764	0.44	0.181	0.000457333
MYL2	1.29e-08	-0.896038	0.762	0.886	0.000473004
KBTBD2	1.44e-08	0.687986	0.202	0.048	0.000527445
KIAA1671	1.63e-08	0.784653	0.262	0.076	0.000595665
NUMB	1.63e-08	0.728542	0.476	0.196	0.000597937
PCAT19	1.66e-08	0.5894	0.143	0.024	0.000606654
DISC1FP1	1.74e-08	0.785938	0.167	0.034	0.00063643
PICALM	1.86e-08	0.887419	0.702	0.411	0.000682161
2023-03-05	1.93e-08	0.744248	0.286	0.089	0.000705638
MCAM	1.99e-08	0.688318	0.167	0.034	0.000727835
AGPAT4	2.04e-08	0.562091	0.131	0.021	0.000746732
MT-ND2	2.05e-08	-0.631569	0.952	1	0.00074902
PARP14	2.25e-08	0.593925	0.214	0.052	0.000822216
TSPAN7	2.25e-08	0.446605	0.143	0.024	0.000822523
JAG2	2.27e-08	0.398894	0.095	0.01	0.000831957
B3GNT5	2.27e-08	0.390845	0.095	0.01	0.000831958
AC114971.1	2.54e-08	0.655296	0.131	0.021	0.00092833
RYR2	2.75e-08	-0.474958	1	1	0.00100665
OAS3	2.83e-08	0.234529	0.095	0.01	0.00103567
TNFRSF10A	2.86e-08	0.240132	0.095	0.01	0.00104649
CACNA1C	2.91e-08	-0.46295	0.964	0.995	0.00106482
TRDN	2.98e-08	-0.713231	0.75	0.87	0.00109087
RB1	2.99e-08	0.660391	0.524	0.234	0.00109614
TSBP1-AS1	3.34e-08	0.403751	0.107	0.014	0.00122306
GBP4	3.37e-08	0.291839	0.107	0.014	0.00123452
LURAP1L	3.39e-08	0.459463	0.119	0.017	0.00124142
AQP1	3.5e-08	0.847071	0.298	0.098	0.00127954
ETS2	3.58e-08	0.660271	0.274	0.082	0.00131021
STK10	3.74e-08	0.440036	0.226	0.058	0.00136733
SRGAP2	3.84e-08	0.63588	0.179	0.039	0.00140393
SH3RF1	4.01e-08	1.021	0.345	0.126	0.00146594
RASIP1	4.02e-08	0.584566	0.155	0.03	0.00147305
SEMA6A	4.03e-08	0.685675	0.262	0.078	0.00147434
L3MBTL4	4.1e-08	0.584325	0.238	0.065	0.00150185
WARS	4.15e-08	0.837181	0.298	0.098	0.0015172
KCNQ1OT1	4.44e-08	1.18309	0.298	0.098	0.0016238
LIPE-AS1	4.77e-08	0.838189	0.214	0.056	0.00174417
FCHO2	4.87e-08	0.641294	0.369	0.137	0.00178399
TEAD4	5.38e-08	0.30616	0.083	0.008	0.00196947
SLC25A43	5.63e-08	0.330795	0.083	0.008	0.00205979
COQ6	5.69e-08	0.308355	0.083	0.008	0.00208298
NTRK2	6.74e-08	0.837957	0.119	0.019	0.00246805
COL4A1	6.93e-08	0.895845	0.571	0.292	0.00253651
RNASEK	7.11e-08	0.327307	0.131	0.022	0.00260101
ABHD17A	7.22e-08	0.32984	0.167	0.035	0.00264152
ACE	7.32e-08	0.493484	0.119	0.019	0.00267937
ANKRD29	7.44e-08	0.442372	0.119	0.019	0.00272369
CLDN5	7.92e-08	0.718234	0.19	0.046	0.00289756
JCAD	8.71e-08	0.544031	0.155	0.031	0.00318969
CAPN2	8.8e-08	0.732912	0.262	0.08	0.00322135
COBLL1	8.9e-08	0.769843	0.464	0.21	0.00325923
SLCO2A1	8.93e-08	0.24719	0.06	0.003	0.00327024
LNX1-AS1	9.2e-08	0.221519	0.06	0.003	0.00336682
SH2D3C	9.25e-08	0.474716	0.167	0.036	0.0033864
NEDD4	9.38e-08	0.775786	0.345	0.131	0.00343423
CAV1	9.4e-08	0.771585	0.571	0.286	0.00344071
SLC35G2	9.55e-08	0.23481	0.071	0.006	0.00349496
WWTR1	9.93e-08	0.924581	0.536	0.258	0.00363455
YES1	1.01e-07	0.754258	0.286	0.095	0.00370637
AFDN	1.05e-07	1.13787	0.548	0.297	0.00383079
GIMAP5	1.07e-07	0.264268	0.095	0.012	0.00390204
LDB3	1.4e-07	-0.487023	0.94	0.981	0.00512565
CXCL12	1.44e-07	0.964548	0.25	0.079	0.00528039
CEP112	1.5e-07	0.932191	0.512	0.265	0.00549239
RAPGEF2	1.52e-07	0.891306	0.81	0.561	0.00557708
SOX13	1.58e-07	0.54256	0.119	0.02	0.00577378
OSMR	1.59e-07	0.519569	0.179	0.042	0.00581817
ESAM	1.59e-07	0.384969	0.19	0.046	0.0058377
ZC3HAV1	1.6e-07	0.51402	0.202	0.052	0.0058464
MTRNR2L12	1.61e-07	0.735212	0.893	0.713	0.00590867
TENM2	1.69e-07	-0.671164	0.726	0.868	0.00618159
DOCK1	1.73e-07	0.889825	0.583	0.326	0.006326
ZNF423	1.75e-07	0.562762	0.19	0.048	0.00640111
SLC9A3R2	1.88e-07	0.653225	0.298	0.102	0.0068936
ZNF532	1.92e-07	0.65624	0.452	0.198	0.00701315
LPL	2.09e-07	-0.779657	0.726	0.863	0.00764713
MCF2L	2.1e-07	0.874809	0.298	0.104	0.00767458
THSD7A	2.1e-07	0.872238	0.226	0.065	0.00769387
EBF3	2.13e-07	0.623434	0.19	0.049	0.00778789
UBE2J1	2.13e-07	0.460115	0.19	0.048	0.00779145
DYNC1I2	2.17e-07	0.591438	0.298	0.103	0.00795833
SLC26A3	2.23e-07	-1.23755	0.06	0.334	0.00815458
PODXL	2.24e-07	0.596359	0.226	0.065	0.00818793
IRAK3	2.3e-07	0.611998	0.214	0.059	0.00842101
CHN1	2.4e-07	0.610986	0.274	0.088	0.00878257
SERPINI1	2.46e-07	0.374918	0.107	0.016	0.009022
BLMH	2.55e-07	0.439988	0.107	0.016	0.00932903
AC079380.1	2.58e-07	0.648778	0.095	0.013	0.00943379
LMCD1	2.59e-07	0.827283	0.369	0.146	0.00948503
DENND2A	2.82e-07	0.734376	0.238	0.073	0.0103119
LMOD1	2.94e-07	0.906808	0.119	0.021	0.0107562
TNS2	2.97e-07	0.412635	0.202	0.053	0.0108838
TANC2	2.99e-07	0.715189	0.25	0.079	0.0109275
IFNAR2	3.28e-07	0.431314	0.214	0.059	0.0120139
FGF12	3.46e-07	-0.511053	0.988	0.994	0.012646
MED13L	3.58e-07	0.733689	0.75	0.492	0.0130866
GPM6A	3.95e-07	-1.21136	0.083	0.358	0.0144417
PKD1L1	4.05e-07	1.41396	0.369	0.161	0.0148144
CD200	4.31e-07	0.679679	0.071	0.007	0.0157852
MYO1D	4.33e-07	0.981597	0.369	0.149	0.015835
FGF2	4.41e-07	0.513618	0.119	0.021	0.0161341
ADCY4	4.41e-07	0.420242	0.119	0.021	0.0161341
MYCT1	4.43e-07	0.2896	0.143	0.029	0.0162158
CDK9	4.54e-07	0.385646	0.071	0.007	0.0166079
MX1	4.68e-07	0.403323	0.119	0.021	0.0171246
PIK3C2B	4.79e-07	0.611833	0.238	0.074	0.0175341
NEGR1	5.16e-07	-1.20264	0.083	0.349	0.0188908
MEF2C-AS1	5.16e-07	0.664037	0.298	0.105	0.0188957
CX3CL1	5.55e-07	0.364677	0.119	0.021	0.0203099
MT-ND4	5.58e-07	-0.558659	0.952	1	0.0204196
EMP1	6.04e-07	0.623253	0.298	0.107	0.0220897
STAT5B	6.11e-07	0.593941	0.274	0.092	0.0223631
CBFA2T3	6.31e-07	0.406477	0.107	0.017	0.0230956
SEPTIN7	6.63e-07	0.694349	0.417	0.191	0.02425
AKAP12	6.8e-07	1.09526	0.226	0.07	0.0249035
EPSTI1	6.85e-07	0.423628	0.143	0.03	0.0250693
IFI16	6.87e-07	0.411645	0.155	0.035	0.0251619
PAXBP1-AS1	6.93e-07	0.286244	0.06	0.005	0.0253794
AL365356.1	7.02e-07	0.29677	0.06	0.005	0.0257065
TMEM132A	7.49e-07	0.280803	0.06	0.005	0.0274037
HEIH	7.68e-07	0.287874	0.06	0.005	0.0281124
AC025569.1	7.78e-07	0.235461	0.06	0.005	0.0284734
TAP1	7.93e-07	0.257038	0.083	0.01	0.0290299
SMCHD1	8.2e-07	0.753695	0.548	0.282	0.0300307
PELI2	8.24e-07	0.598665	0.179	0.046	0.0301486
ACTA1	8.25e-07	-1.0016	0.369	0.596	0.0302117
SOCS2-AS1	8.29e-07	0.213349	0.06	0.005	0.030346
AFAP1	8.32e-07	0.343472	0.155	0.035	0.0304371
PARP12	8.39e-07	0.412977	0.119	0.022	0.0307132
PLEKHF2	8.48e-07	0.281258	0.083	0.01	0.031044
CREB3L1	8.64e-07	0.334352	0.119	0.022	0.0316052
TMEM163	8.7e-07	0.43994	0.119	0.022	0.031832
ECT2	8.73e-07	0.188537	0.083	0.01	0.0319478
PXDN	8.74e-07	0.468644	0.167	0.041	0.0320017
HBA1	8.77e-07	0.537434	0.143	0.031	0.0320853
DDX58	8.84e-07	0.369825	0.167	0.041	0.0323595
AIF1L	8.87e-07	0.250781	0.095	0.014	0.0324714
ELF2	8.94e-07	0.809703	0.536	0.29	0.0327304
NEURL1B	9.09e-07	0.810905	0.202	0.059	0.0332524
UBE2D3	9.32e-07	0.630118	0.643	0.368	0.0341295
ZC2HC1A	9.92e-07	0.378661	0.143	0.031	0.0363094
MYL3	9.98e-07	-0.761597	0.595	0.775	0.0365344
ZDHHC20	1e-06	0.603038	0.333	0.132	0.0367426
AC018816.1	1.06e-06	0.452847	0.179	0.046	0.0387926
TJP1	1.13e-06	0.929152	0.643	0.399	0.0413353
NDRG1	1.17e-06	0.64169	0.321	0.123	0.0426414
OSMR-AS1	1.19e-06	0.498336	0.131	0.027	0.0435792
H3F3A	1.23e-06	0.658724	0.25	0.085	0.0449115
EIF2AK2	1.28e-06	0.529335	0.202	0.059	0.0469684
LAMA2	1.34e-06	-0.533777	0.893	0.983	0.0490904
CCNL1	1.42e-06	0.784779	0.286	0.104	0.0518652
PHF3	1.47e-06	0.70206	0.357	0.151	0.0537327
SYNE1	1.49e-06	0.848691	0.774	0.555	0.0544439
ZDHHC13	1.53e-06	0.332527	0.107	0.019	0.0559529
KAT6A	1.54e-06	0.884663	0.512	0.269	0.0565327
PRAG1	1.62e-06	0.762901	0.119	0.023	0.0591717
RPS19	1.68e-06	0.640356	0.298	0.111	0.061643
RIMS1	1.74e-06	0.997491	0.167	0.044	0.0637786
MSN	1.75e-06	0.666064	0.429	0.196	0.0641914
GNAI2	1.75e-06	0.547341	0.238	0.078	0.0641932
NEK3	1.77e-06	0.405035	0.095	0.015	0.0648192
MYO18B	1.9e-06	-0.683386	0.679	0.815	0.0696385
AC005753.2	1.94e-06	0.313805	0.071	0.008	0.0710804
ARHGEF3	1.98e-06	0.826148	0.452	0.221	0.0724262
ANK2	2.01e-06	-0.635452	0.726	0.831	0.0737333
CPNE2	2.09e-06	0.151094	0.071	0.008	0.0763716
AC092428.1	2.2e-06	0.253473	0.071	0.008	0.0803805
HNRNPD	2.2e-06	0.717893	0.321	0.132	0.0806775
DYNLRB1	2.26e-06	0.245611	0.095	0.015	0.082665
GNA13	2.33e-06	0.628095	0.238	0.08	0.085151
SP100	2.34e-06	0.758234	0.381	0.17	0.0856378
CNRIP1	2.4e-06	0.379892	0.083	0.012	0.0876984
RIMKLB	2.41e-06	0.402812	0.202	0.06	0.0882142
NRARP	2.51e-06	0.260521	0.083	0.012	0.0916977
C7	2.56e-06	-1.24585	0.036	0.261	0.0936588
GCH1	2.57e-06	0.503316	0.107	0.02	0.0940288
TTC13	2.58e-06	0.483015	0.155	0.038	0.09431
PHIP	2.62e-06	0.629494	0.595	0.337	0.0959343
PKP4	2.69e-06	0.822141	0.619	0.367	0.0983725
NRAP	2.77e-06	-0.724103	0.524	0.708	0.101424
RPS28	2.91e-06	0.502948	0.357	0.146	0.106647
S1PR1	2.93e-06	0.463775	0.107	0.02	0.107066
MCU	3e-06	0.804439	0.405	0.192	0.109689
INPP5D	3.05e-06	0.362826	0.167	0.043	0.111491
ARHGAP31	3.13e-06	0.64184	0.583	0.315	0.114701
FHOD3	3.15e-06	-0.605323	0.738	0.892	0.115453
RAMP2	3.18e-06	0.514016	0.143	0.034	0.116309
DGKE	3.23e-06	0.480155	0.107	0.02	0.118388
DOCK4	3.35e-06	0.826881	0.631	0.411	0.122793
NOSTRIN	3.45e-06	0.461957	0.143	0.034	0.126415
NR2F2-AS1	3.53e-06	1.25177	0.25	0.093	0.129033
ARHGEF7	3.82e-06	0.794721	0.476	0.255	0.139737
AKAP13	3.82e-06	-0.448024	0.917	0.962	0.139929
BNIP2	3.86e-06	0.494918	0.19	0.056	0.141435
SNTG2	3.89e-06	0.927993	0.119	0.024	0.142449
RUFY3	3.94e-06	0.736806	0.369	0.162	0.144227
PCDH17	3.95e-06	1.36908	0.143	0.035	0.144675
PIK3C2A	4e-06	0.714275	0.345	0.145	0.146363
SOX18	4.07e-06	0.352186	0.143	0.034	0.148787
NSUN3	4.09e-06	0.303048	0.131	0.029	0.149648
EGR1	4.4e-06	-0.964458	0.357	0.57	0.161074
KIAA1109	4.44e-06	0.560599	0.452	0.22	0.162464
AC005920.2	4.44e-06	0.192432	0.06	0.006	0.162661
SYCP2L	4.59e-06	0.602269	0.095	0.016	0.168166
LINC00840	4.7e-06	0.151777	0.06	0.006	0.17211
AC098829.1	4.7e-06	0.81826	0.143	0.035	0.172203
MFSD6	4.77e-06	0.537259	0.131	0.03	0.174649
MYO9B	4.78e-06	0.55221	0.429	0.203	0.175126
ARGLU1	4.79e-06	0.656315	0.69	0.423	0.175442
CMYA5	4.85e-06	-0.541507	0.738	0.926	0.177557
HERC1	5.01e-06	0.729482	0.631	0.397	0.183469
STC1	5.07e-06	0.521282	0.095	0.016	0.185737
ASAP2	5.12e-06	0.459134	0.274	0.098	0.187324
WDR44	5.15e-06	0.572949	0.262	0.097	0.188359
CASP10	5.23e-06	0.240691	0.095	0.016	0.191488
TCF12	5.35e-06	0.544618	0.774	0.513	0.195721
WT1	5.35e-06	0.304478	0.095	0.016	0.195913
B2M	5.53e-06	0.791012	0.548	0.294	0.202413
EHBP1	5.54e-06	0.624284	0.512	0.27	0.202947
JMJD1C	5.57e-06	0.647473	0.833	0.651	0.203959
ADARB1	5.59e-06	0.693132	0.381	0.178	0.204524
FKBP1A	5.63e-06	0.560627	0.19	0.058	0.206191
EPHB4	5.69e-06	0.364475	0.083	0.013	0.208116
CRYBG3	5.97e-06	0.596785	0.369	0.169	0.218434
CEACAM1	5.98e-06	0.54724	0.083	0.013	0.21883
CCNY	6.01e-06	0.699985	0.679	0.446	0.220075
TRIM38	6.08e-06	0.525484	0.119	0.025	0.22271
ARPC3	6.12e-06	0.348588	0.131	0.03	0.223892
A2M-AS1	6.16e-06	0.257772	0.071	0.009	0.225585
PPP1R12B	6.24e-06	-0.558893	0.845	0.893	0.228531
HYAL1	6.29e-06	0.325125	0.083	0.013	0.23007
PLCG2	6.61e-06	0.469586	0.94	0.822	0.241887
SAMD4A	6.63e-06	-0.479594	0.833	0.914	0.242707
PGGHG	6.65e-06	0.33298	0.071	0.009	0.243258
BIRC6	6.68e-06	0.566964	0.655	0.401	0.244445
AC104211.2	6.77e-06	0.201081	0.071	0.009	0.247879
TM4SF18	7.03e-06	0.201798	0.071	0.009	0.257375
CC2D2B	7.17e-06	0.259577	0.071	0.009	0.262252
GMDS	7.28e-06	0.716229	0.369	0.173	0.266511
CYYR1-AS1	7.37e-06	0.235769	0.071	0.009	0.269733
SP110	7.39e-06	0.27452	0.119	0.025	0.270604
CTNND1	7.43e-06	0.582371	0.56	0.319	0.272123
IER5L	7.44e-06	0.183974	0.071	0.009	0.272272
BABAM1	7.44e-06	0.195452	0.071	0.009	0.272272
NUTF2	7.53e-06	0.278128	0.119	0.025	0.275729
TIE1	7.54e-06	0.57103	0.143	0.036	0.276072
CD34	7.95e-06	0.443112	0.202	0.064	0.291027
RBMS2	8.09e-06	0.5847	0.238	0.085	0.296282
AL589693.1	8.3e-06	1.46626	0.262	0.107	0.303726
JAG1	8.31e-06	0.545128	0.167	0.048	0.304199
BST2	8.32e-06	0.316247	0.155	0.041	0.304565
IFITM3	8.41e-06	0.640135	0.31	0.13	0.307724
ID1	8.48e-06	1.06505	0.214	0.074	0.310465
ARPC1B	8.5e-06	0.394593	0.143	0.036	0.31097
NCK2	8.72e-06	0.576188	0.262	0.096	0.319022
ACTN2	8.95e-06	-0.509349	0.786	0.928	0.327729
ANGPT1	9.15e-06	0.539585	0.155	0.042	0.335016
ELL	9.23e-06	0.414666	0.214	0.071	0.337839
NCOA3	9.26e-06	0.535018	0.631	0.356	0.339028
RPRD1A	9.33e-06	0.328471	0.274	0.103	0.341647
SIPA1L1	9.37e-06	0.685644	0.286	0.115	0.34298
RBFOX1	9.48e-06	-0.634354	0.702	0.834	0.347081
NUMA1	9.58e-06	0.42467	0.298	0.117	0.350643
XIRP2	9.58e-06	-0.821891	0.56	0.72	0.35067
MCTP1	9.67e-06	0.847187	0.321	0.14	0.353801
XPOT	9.73e-06	0.280792	0.095	0.017	0.356207
TMSB10	9.73e-06	0.795907	0.369	0.173	0.356221
LCP2	9.87e-06	0.379091	0.095	0.017	0.361412
HDAC7	1.02e-05	0.498806	0.238	0.086	0.371599
ACTR3	1.02e-05	0.678166	0.274	0.11	0.373151
SLC8A1	1.02e-05	-0.424767	0.964	0.993	0.374359
DICER1	1.03e-05	0.486883	0.321	0.133	0.378643
ADCY3	1.04e-05	0.358592	0.095	0.017	0.380209
TPM4	1.05e-05	0.376085	0.25	0.089	0.382876
PPP1R14A	1.08e-05	0.495676	0.119	0.027	0.395879
ITM2A	1.1e-05	0.385797	0.155	0.042	0.401582
NECAP2	1.1e-05	0.203482	0.095	0.017	0.402834
LRIG3	1.11e-05	0.314592	0.131	0.031	0.407078
ANAPC1	1.14e-05	0.424851	0.19	0.06	0.417592
GRK5	1.16e-05	0.504088	0.357	0.158	0.424426
DISC1	1.17e-05	0.688205	0.238	0.087	0.42769
MMRN2	1.17e-05	0.323483	0.119	0.027	0.428275
PTPRG	1.19e-05	0.559997	0.94	0.882	0.435346
SETBP1	1.21e-05	0.731848	0.381	0.177	0.444221
KIRREL1	1.23e-05	0.346311	0.119	0.027	0.449452
ENTPD1	1.27e-05	0.560334	0.131	0.032	0.463497
CDKN1C	1.42e-05	0.700726	0.179	0.056	0.520135
AC004889.1	1.46e-05	0.298125	0.083	0.014	0.536186
WTAP	1.5e-05	0.562057	0.238	0.088	0.549326
GPR89B	1.51e-05	0.166467	0.119	0.027	0.551129
PIAS1	1.52e-05	0.632774	0.548	0.313	0.558019
KIAA1217	1.53e-05	0.563275	0.857	0.716	0.560582
PABPC1	1.54e-05	0.514388	0.381	0.176	0.565408
SH3BGRL	1.55e-05	0.71102	0.202	0.07	0.566085
AL445426.1	1.6e-05	0.339178	0.083	0.014	0.584246
ACER3	1.61e-05	0.623902	0.274	0.111	0.589435
SYBU	1.62e-05	0.239057	0.083	0.014	0.593414
MAMLD1	1.62e-05	0.467246	0.131	0.032	0.594236
HLA-A	1.63e-05	0.597615	0.298	0.119	0.595423
KMT2E	1.64e-05	0.771995	0.536	0.327	0.598998
TMTC2	1.65e-05	0.953944	0.262	0.108	0.605582
ARMH4	1.66e-05	0.431528	0.262	0.1	0.607745
KLF4	1.69e-05	0.386738	0.179	0.054	0.618344
SECISBP2	1.73e-05	0.502053	0.25	0.093	0.632206
MAML3	1.76e-05	0.758682	0.417	0.216	0.644561
GPR161	1.77e-05	0.225097	0.06	0.007	0.649552
SCN3A	1.81e-05	0.265709	0.06	0.007	0.662855
DPYSL3	1.84e-05	0.400901	0.167	0.049	0.673491
KLF2	1.85e-05	0.631348	0.262	0.102	0.677571
FABP5	1.9e-05	0.474655	0.274	0.108	0.69724
CFLAR-AS1	1.91e-05	0.384952	0.107	0.023	0.697323
NPDC1	1.91e-05	0.424955	0.19	0.061	0.697833
LINC02100	1.92e-05	0.136394	0.06	0.007	0.704339
MMS22L	1.94e-05	0.399241	0.155	0.044	0.709378
ZNF808	1.94e-05	0.332173	0.202	0.067	0.709643
CCDC149	1.98e-05	0.390827	0.179	0.056	0.724953
NETO2	2e-05	0.411899	0.071	0.01	0.730368
PIGH	2.02e-05	0.0779971	0.06	0.007	0.740787
CXCL2	2.03e-05	0.474575	0.167	0.05	0.742579
ATOH8	2.04e-05	0.263715	0.095	0.019	0.747958
EML4	2.07e-05	0.714459	0.262	0.109	0.759454
SENP5	2.1e-05	0.449969	0.333	0.148	0.767273
PRICKLE2	2.1e-05	0.518366	0.298	0.124	0.76738
SELENOW	2.15e-05	0.456492	0.369	0.168	0.787098
ZNF169	2.19e-05	0.158488	0.071	0.01	0.803145
LIFR	2.27e-05	0.789781	0.381	0.19	0.831909
GRASP	2.29e-05	0.281042	0.179	0.054	0.839512
SCN7A	2.3e-05	-1.02406	0.048	0.251	0.840174
NOTCH1	2.37e-05	0.313983	0.119	0.028	0.866402
MGAT1	2.37e-05	0.387205	0.155	0.044	0.86668
SH3BP4	2.4e-05	0.341261	0.107	0.023	0.878755
ASRGL1	2.45e-05	0.149878	0.071	0.01	0.898059
NR3C2	2.46e-05	0.457998	0.786	0.556	0.901768
PHLPP1	2.49e-05	0.465135	0.333	0.145	0.911457
TRPC4AP	2.52e-05	0.426924	0.357	0.161	0.923595
ATG16L2	2.57e-05	0.455966	0.119	0.029	0.942399
TPM1	2.58e-05	-0.498224	0.893	0.907	0.944616
RUNDC3B	2.63e-05	0.588426	0.083	0.015	0.96087
RAB6A	2.7e-05	0.428121	0.31	0.131	0.989005
TBK1	2.72e-05	0.434824	0.167	0.051	0.994781
LRRC39	2.75e-05	-0.992328	0.226	0.418	1
CHSY3	2.81e-05	0.63434	0.179	0.058	1
STARD9	2.88e-05	0.512705	0.274	0.112	1
TNNI3	2.91e-05	-0.600617	0.75	0.881	1
LINC00989	2.91e-05	0.488943	0.083	0.015	1
THUMPD2	2.96e-05	0.376446	0.167	0.051	1
LINC01197	3.02e-05	0.537393	0.083	0.015	1
RILPL2	3.06e-05	0.124051	0.107	0.023	1
NR3C1	3.08e-05	0.575883	0.524	0.307	1
HOOK3	3.09e-05	0.423998	0.393	0.185	1
NECTIN2	3.11e-05	0.51623	0.238	0.09	1
RNF130	3.18e-05	0.360991	0.393	0.181	1
CCZ1	3.18e-05	0.278432	0.083	0.015	1
NUTM2A-AS1	3.2e-05	0.508236	0.345	0.162	1
MAP3K8	3.26e-05	0.550406	0.131	0.035	1
ATP8B1	3.26e-05	0.445183	0.369	0.17	1
PRKD3	3.3e-05	0.436052	0.179	0.058	1
FRMD4A	3.3e-05	0.559506	0.56	0.324	1
ARAP3	3.32e-05	0.464384	0.131	0.035	1
SOS1	3.33e-05	0.614959	0.524	0.302	1
PDLIM1	3.33e-05	0.713266	0.369	0.18	1
RBM20	3.33e-05	-0.455667	0.845	0.954	1
ROCK2	3.35e-05	0.657516	0.488	0.271	1
LRRC8B	3.38e-05	0.401016	0.167	0.052	1
TRIM3	3.42e-05	0.312559	0.083	0.015	1
CA4	3.43e-05	0.627133	0.095	0.02	1
XRN1	3.45e-05	0.591954	0.393	0.195	1
DLL4	3.5e-05	0.386166	0.107	0.024	1
SYCP2	3.73e-05	0.338177	0.095	0.02	1
CFD	3.76e-05	-0.871119	0.024	0.213	1
C1orf21	3.77e-05	0.730213	0.679	0.45	1
PPM1E	3.79e-05	0.247507	0.083	0.015	1
FAT4	3.83e-05	0.668207	0.298	0.136	1
MB	3.9e-05	-0.80576	0.429	0.582	1
TRPC6	4.01e-05	0.363404	0.095	0.02	1
DMD	4.07e-05	-0.426607	0.952	0.983	1
DLEU2	4.11e-05	0.719049	0.524	0.295	1
YEATS2	4.19e-05	0.494784	0.25	0.101	1
MSH2	4.24e-05	0.343869	0.167	0.052	1
BCAS3	4.24e-05	0.572881	0.726	0.479	1
SGIP1	4.25e-05	0.379381	0.238	0.089	1
ANKRD1	4.38e-05	-0.516214	0.857	0.905	1
OSBPL5	4.44e-05	0.370688	0.167	0.052	1
CCNH	4.45e-05	0.788297	0.488	0.289	1
CCDC88C	4.45e-05	0.294158	0.095	0.02	1
PROCR	4.45e-05	0.245749	0.095	0.02	1
SPAG9	4.45e-05	0.57136	0.56	0.333	1
TNFSF10	4.64e-05	0.307641	0.131	0.035	1
VPS29	4.64e-05	0.23174	0.143	0.041	1
TNFRSF10D	4.65e-05	0.288401	0.095	0.02	1
APOD	4.78e-05	-1.05643	0.071	0.258	1
ATRX	4.79e-05	0.479342	0.643	0.408	1
HES1	4.81e-05	0.589437	0.19	0.066	1
CTNNA3	4.94e-05	-0.395146	0.917	0.973	1
MALAT1	4.95e-05	-0.243074	1	1	1
RASAL2	5e-05	0.639867	0.81	0.644	1
PLXNC1	5.03e-05	0.179641	0.095	0.02	1
KHDC4	5.07e-05	0.380634	0.179	0.059	1
STK19	5.17e-05	0.255601	0.071	0.012	1
RHOJ	5.22e-05	0.541673	0.202	0.072	1
AKR1C3	5.25e-05	0.239308	0.071	0.012	1
CLIC4	5.3e-05	0.605486	0.56	0.336	1
ARHGEF28	5.42e-05	0.22708	0.071	0.012	1
SNRK	5.67e-05	0.54591	0.44	0.227	1
AC092068.2	5.84e-05	0.242985	0.06	0.008	1
MYOM2	5.84e-05	-0.511709	0.702	0.874	1
LGALS1	5.9e-05	0.480493	0.262	0.108	1
RUNX1T1	5.93e-05	0.62252	0.655	0.426	1
AGFG1	5.97e-05	0.48525	0.298	0.132	1
PPCDC	5.98e-05	0.370389	0.214	0.079	1
AP001042.1	6.05e-05	0.25113	0.06	0.008	1
SYTL2	6.15e-05	0.481881	0.083	0.016	1
CAPNS1	6.23e-05	0.311337	0.179	0.059	1
DTYMK	6.28e-05	0.188772	0.06	0.008	1
IL27RA	6.28e-05	0.168744	0.06	0.008	1
ZNF66	6.28e-05	0.111496	0.06	0.008	1
FAR2	6.34e-05	0.543881	0.095	0.021	1
LRMDA	6.39e-05	0.901969	0.821	0.692	1
LUM	6.45e-05	-0.858344	0	0.163	1
RAP1B	6.61e-05	0.498535	0.345	0.171	1
PALLD	6.67e-05	-0.435307	0.905	0.972	1
ZFY	6.75e-05	-0.960568	0.024	0.199	1
N4BP2L1	6.81e-05	0.491064	0.119	0.031	1
FAM76B	6.96e-05	0.280625	0.095	0.021	1
HEYL	6.99e-05	0.260416	0.131	0.036	1
ARHGAP18	7.03e-05	0.6131	0.143	0.043	1
CIITA	7.13e-05	0.28897	0.107	0.025	1
SULF2	7.15e-05	0.35109	0.143	0.042	1
SMAD9	7.15e-05	0.292513	0.083	0.016	1
NFKBIA	7.18e-05	0.34435	0.143	0.042	1
DYM	7.24e-05	0.564411	0.512	0.297	1
STAM2	7.25e-05	0.621137	0.214	0.083	1
BRAT1	7.31e-05	0.329501	0.095	0.021	1
ADGRG1	7.35e-05	0.24018	0.083	0.016	1
B3GNT2	7.37e-05	0.382237	0.167	0.054	1
VBP1	7.4e-05	0.273334	0.083	0.016	1
JAM2	7.41e-05	0.712133	0.333	0.155	1
ZSWIM6	7.43e-05	0.487844	0.69	0.451	1
AGO2	7.44e-05	0.505266	0.345	0.169	1
MAGI3	7.64e-05	0.613658	0.357	0.178	1
PFN1	7.66e-05	0.277129	0.143	0.042	1
WDR92	7.68e-05	0.459158	0.119	0.031	1
CALCRL	7.79e-05	1.22988	0.238	0.101	1
CLIC2	8.01e-05	0.227955	0.107	0.025	1
ZNHIT1	8.12e-05	0.271618	0.095	0.021	1
WDR45B	8.17e-05	0.437423	0.179	0.061	1
RHOA	8.26e-05	0.498001	0.333	0.158	1
PPP2R3C	8.34e-05	0.335717	0.167	0.054	1
CLIC5	8.47e-05	0.657742	0.762	0.576	1
CRLF3	8.55e-05	0.320803	0.143	0.043	1
TMEM178B	8.62e-05	-0.614489	0.667	0.76	1
ICAM2	9.07e-05	0.254044	0.095	0.021	1
EPS8	9.14e-05	1.30091	0.286	0.132	1
PRPF4B	9.66e-05	0.491537	0.357	0.17	1
FAM171A1	9.67e-05	0.399072	0.155	0.049	1
ADAMTS9-AS2	9.72e-05	1.23973	0.405	0.221	1
DPYD	0.000100837	0.605341	0.607	0.411	1
SPARCL1	0.000103028	0.762958	0.607	0.393	1
CDC42	0.000103433	0.337829	0.31	0.138	1
PCNX1	0.0001099	0.609172	0.488	0.278	1
TRA2B	0.000111078	0.549036	0.44	0.246	1
SERF2	0.000113266	0.38068	0.262	0.11	1
VAT1	0.000115042	0.166896	0.071	0.013	1
LZIC	0.000115332	0.380589	0.119	0.032	1
RPS25	0.000116491	0.399789	0.214	0.081	1
SPRED1	0.00011734	0.562288	0.202	0.078	1
XRCC5	0.000118229	0.558199	0.333	0.162	1
AC023424.3	0.000118509	0.342379	0.071	0.013	1
MTBP	0.000118509	0.291818	0.071	0.013	1
RPS20	0.000119616	0.296842	0.25	0.102	1
FMNL3	0.000119763	0.259774	0.107	0.027	1
TCF15	0.000120044	0.349177	0.095	0.022	1
TYMP	0.000120928	0.35055	0.083	0.017	1
NBPF15	0.000124126	0.31932	0.083	0.017	1
UBA6	0.000124226	0.265419	0.214	0.081	1
LINC01762	0.000124815	0.13432	0.071	0.013	1
WIPF1	0.000125068	0.656017	0.298	0.141	1
TAGLN2	0.000125491	0.330665	0.214	0.081	1
FAR1	0.000126686	0.378421	0.298	0.131	1
ATP2A2	0.000128231	-0.574198	0.619	0.729	1
POC1B	0.000129411	0.301103	0.119	0.032	1
DTX3L	0.000131436	0.165053	0.071	0.013	1
PKN1	0.000132129	0.269475	0.155	0.05	1
ARMC8	0.000134095	0.420243	0.31	0.145	1
NR2F2	0.000134267	0.395571	0.095	0.022	1
RSBN1	0.00013445	0.480305	0.179	0.065	1
MYO5C	0.000135158	0.445803	0.107	0.028	1
MRTFB	0.000135631	0.598462	0.5	0.305	1
HSD17B11	0.000137731	0.42511	0.083	0.017	1
AUTS2	0.000138703	0.374221	0.905	0.74	1
SESTD1	0.000142459	0.295198	0.298	0.134	1
HDGFL3	0.000143957	0.411006	0.167	0.057	1
HLA-C	0.000144042	0.65467	0.286	0.13	1
MLLT3	0.000145383	0.746268	0.452	0.258	1
NXN	0.000146057	0.437118	0.44	0.234	1
UBE2N	0.000146353	0.371064	0.214	0.085	1
ASS1	0.000147461	0.146723	0.095	0.022	1
CCNK	0.000147614	0.285105	0.143	0.044	1
PDLIM5	0.000149346	-0.420959	0.94	0.955	1
PRKD2	0.000149551	0.46431	0.143	0.044	1
SNN	0.000150602	0.224605	0.06	0.009	1
CD300LG	0.000152732	0.203502	0.083	0.017	1
TRMT1	0.000153136	0.200813	0.06	0.009	1
BMPR2	0.000153612	0.606012	0.69	0.488	1
LSAMP	0.000153719	-0.956943	0.095	0.272	1
PPP2R2A	0.000155324	0.432834	0.452	0.254	1
ACTC1	0.00015558	-0.768916	0.381	0.552	1
GNB1	0.000161582	0.773409	0.417	0.233	1
RPS6KA5	0.000162381	0.357782	0.262	0.111	1
PHACTR2	0.000162913	0.761093	0.571	0.365	1
PWWP3A	0.000164555	0.298414	0.155	0.051	1
ZSWIM7	0.000165896	0.262438	0.155	0.051	1
AC008514.1	0.000167805	0.223377	0.06	0.009	1
ELK3	0.000168539	0.519474	0.155	0.052	1
SLC44A2	0.000170023	0.407282	0.214	0.086	1
MYO1C	0.000170262	0.393782	0.274	0.121	1
AL132780.1	0.00017203	0.15298	0.06	0.009	1
PIEZO1	0.00017203	0.192813	0.06	0.009	1
MANEA	0.000174902	0.151637	0.06	0.009	1
ITGB4	0.000176354	0.111696	0.06	0.009	1
VPS16	0.000176354	0.164545	0.06	0.009	1
IRF1	0.000177818	0.131175	0.06	0.009	1
MED4	0.00018111	0.308607	0.202	0.078	1
LAMA3	0.000182616	0.491678	0.131	0.039	1
SPAST	0.000184476	0.39076	0.25	0.107	1
CYP4X1	0.000185312	0.0929233	0.06	0.009	1
PXDNL	0.000190079	-0.537712	0.786	0.884	1
TMEM184B	0.000191685	0.323428	0.25	0.107	1
PTEN	0.000192381	0.602718	0.405	0.213	1
USP6NL	0.000194185	0.62424	0.19	0.073	1
COL4A2	0.000195112	0.592509	0.571	0.36	1
TRAF5	0.00019782	0.368745	0.095	0.023	1
SPRED2	0.000200761	0.474351	0.345	0.175	1
B4GALT5	0.000201716	0.565245	0.31	0.148	1
TM4SF1	0.000205082	0.426189	0.214	0.086	1
MLIP	0.000207039	-0.422452	0.81	0.877	1
NOD1	0.000211934	0.324227	0.167	0.058	1
AARSD1	0.000218296	0.403411	0.131	0.041	1
SENP7	0.000220044	0.577661	0.286	0.138	1
PREX1	0.000229579	0.100654	0.107	0.028	1
FLNB	0.000231211	0.347019	0.202	0.079	1
KPNB1	0.00023307	0.416625	0.226	0.095	1
MBOAT7	0.000233721	0.338118	0.083	0.019	1
AL353138.1	0.000247344	0.23117	0.071	0.014	1
NUTM2B-AS1	0.000247717	0.570167	0.393	0.213	1
STYX	0.000247816	0.294112	0.119	0.035	1
ANK3	0.000249619	-0.672768	0.56	0.674	1
REV3L	0.000249661	0.612907	0.512	0.32	1
RNF213	0.000250479	0.256859	0.274	0.121	1
BCAM	0.000261282	0.451498	0.131	0.042	1
CHUK	0.000262054	0.275815	0.107	0.029	1
PPP1R7	0.000262553	0.225402	0.083	0.019	1
FBXO28	0.000263163	0.311318	0.274	0.122	1
EIF4A3	0.000264159	0.235588	0.083	0.019	1
GIMAP8	0.000264712	0.304208	0.107	0.029	1
SNCAIP	0.00026681	0.170962	0.071	0.014	1
ARHGEF26	0.000267399	0.202465	0.083	0.019	1
ZNF654	0.000270018	0.51246	0.31	0.152	1
ESRRG	0.00027234	-0.527732	0.679	0.801	1
VPS51	0.000272589	0.353958	0.214	0.087	1
MYOM1	0.000274323	-0.404041	0.893	0.987	1
AVL9	0.000276393	0.627309	0.321	0.166	1
ABI1	0.00027929	0.222865	0.262	0.112	1
ARL6IP1	0.000279956	0.447723	0.131	0.042	1
YWHAB	0.000290692	0.361178	0.214	0.087	1
ZFAND3	0.000291759	0.550869	0.798	0.603	1
RABGAP1	0.00029297	0.334881	0.405	0.213	1
SVIL	0.000293053	-0.397474	0.81	0.898	1
UEVLD	0.000302494	0.181493	0.143	0.046	1
PLS3	0.000308068	0.749568	0.381	0.206	1
PAPSS1	0.000310977	0.272563	0.131	0.041	1
DCBLD1	0.000314834	0.553916	0.107	0.03	1
SBF2	0.000323644	0.599346	0.69	0.486	1
CDH2	0.000324686	-0.490592	0.702	0.819	1
GNB4	0.000325055	0.343409	0.143	0.048	1
MT-ND4L	0.000326632	-0.573682	0.69	0.84	1
STOX2	0.000327728	0.685856	0.429	0.262	1
PSEN1	0.000328469	0.3866	0.274	0.129	1
VTA1	0.000331997	0.178821	0.119	0.035	1
XRRA1	0.00033443	0.416718	0.179	0.067	1
TMSB4X	0.000335422	0.391251	0.321	0.156	1
ERBIN	0.000335591	0.507007	0.464	0.269	1
RALGAPA1	0.000340671	0.545943	0.56	0.374	1
FAM162B	0.000344669	0.368976	0.06	0.01	1
ARPC2	0.000345159	0.490384	0.286	0.136	1
LINC01515	0.00034693	0.677271	0.238	0.11	1
BACE2	0.000347558	0.461865	0.214	0.089	1
MCC	0.000349217	0.703174	0.571	0.39	1
REEP3	0.000352416	0.457335	0.321	0.155	1
MAP3K7	0.000353108	0.424639	0.25	0.112	1
NFIB	0.000357628	0.489957	0.821	0.738	1
TSC22D3	0.00036121	0.443079	0.179	0.068	1
DHX37	0.000377697	0.180388	0.06	0.01	1
CDH13	0.000381204	-0.342512	0.94	0.977	1
CASP3	0.00038183	0.301102	0.167	0.06	1
RPS18	0.000382002	0.469511	0.226	0.098	1
RSAD2	0.000382027	0.22195	0.06	0.01	1
TNFAIP1	0.00038284	0.296876	0.107	0.03	1
COP1	0.000384249	0.451244	0.524	0.317	1
PPP4R1	0.000386268	0.421403	0.262	0.121	1
GJA4	0.000386405	0.293149	0.06	0.01	1
NDNF	0.000389348	0.214986	0.06	0.01	1
DIAPH2	0.000389623	0.589881	0.571	0.381	1
LEPR	0.000391967	0.346133	0.155	0.054	1
TNNI3K	0.000394507	-0.454822	0.726	0.835	1
CSNK1G3	0.000396666	0.249563	0.238	0.102	1
RANBP17	0.000397839	0.539491	0.262	0.123	1
LSM6	0.000401335	0.122231	0.06	0.01	1
SHMT1	0.000401335	0.172021	0.06	0.01	1
RALGDS	0.000404653	0.304117	0.167	0.061	1
RDX	0.000404972	0.562613	0.345	0.183	1
PHACTR1	0.0004053	-0.608731	0.655	0.753	1
PSMD4	0.000406661	0.234646	0.143	0.048	1
LAP3	0.000407817	0.29263	0.119	0.036	1
INTS12	0.000409724	0.321309	0.107	0.03	1
MCMBP	0.000409724	0.19801	0.107	0.03	1
RASGRP2	0.000411584	0.238607	0.083	0.02	1
BTN3A2	0.000413055	0.157773	0.095	0.024	1
UBE3A	0.000416224	0.345922	0.44	0.244	1
TAX1BP3	0.000417452	0.227029	0.131	0.042	1
GPD2	0.000421043	0.396016	0.226	0.095	1
KCTD2	0.000421684	0.40818	0.071	0.015	1
RNF125	0.000423693	0.257506	0.083	0.02	1
KLHL2	0.000425868	0.218738	0.107	0.03	1
ZNF28	0.000431118	0.275301	0.083	0.02	1
TMEM87B	0.000434161	0.222095	0.107	0.03	1
ZNF727	0.000435373	0.465897	0.155	0.056	1
LMBR1	0.000443454	0.335458	0.357	0.182	1
SHOC2	0.000445152	0.457858	0.345	0.178	1
ANO6	0.000458582	0.448346	0.488	0.299	1
FKBP9	0.000464677	0.45063	0.19	0.078	1
ACER2	0.000470735	0.260164	0.071	0.015	1
ANKLE2	0.000477129	0.303813	0.143	0.049	1
HERC2	0.000478526	0.585979	0.476	0.298	1
EVA1B	0.000479925	0.2088	0.071	0.015	1
PITPNM2	0.000480581	0.369025	0.429	0.238	1
AC119674.1	0.000485018	0.506928	0.393	0.211	1
SOX7	0.000486144	0.212157	0.071	0.015	1
NEDD1	0.000486892	0.311128	0.095	0.025	1
RPL7A	0.000488072	0.268006	0.238	0.103	1
SHFL	0.000489282	0.147601	0.071	0.015	1
QSOX2	0.000489393	0.0852025	0.083	0.02	1
S100A11	0.000490812	0.337587	0.119	0.037	1
OSTM1	0.000490812	0.388936	0.119	0.037	1
RAD51B	0.000493559	0.901523	0.369	0.225	1
MIR34AHG	0.000495615	0.161406	0.071	0.015	1
SMURF2	0.000500045	0.375238	0.274	0.13	1
SENP2	0.000504379	0.312145	0.202	0.083	1
ZNF791	0.000506423	0.248524	0.167	0.061	1
PLEKHG2	0.00050688	0.137269	0.071	0.015	1
PSPC1	0.000517916	0.504034	0.405	0.234	1
TUBGCP2	0.000529819	0.371305	0.167	0.063	1
FZD3	0.00053183	0.0476453	0.071	0.015	1
UBA2	0.000543308	0.638275	0.238	0.108	1
STAG1	0.000543834	0.480499	0.655	0.476	1
TNFRSF1B	0.000545078	0.251969	0.095	0.025	1
LRRC8C-DT	0.000545078	0.262851	0.095	0.025	1
SLFN5	0.000547372	0.26857	0.119	0.037	1
SLC10A7	0.000547521	0.502509	0.262	0.119	1
NR2C2	0.000560485	0.338775	0.274	0.129	1
KIAA1324L	0.000569453	0.451526	0.155	0.058	1
EFNA5	0.000570008	-0.617244	0.667	0.745	1
PRRG1	0.000572345	0.505901	0.238	0.109	1
AKAP6	0.00057309	-0.38355	0.774	0.883	1
YLPM1	0.000577072	0.528227	0.286	0.145	1
CCDC3	0.000577796	1.15038	0.107	0.032	1
GPAT3	0.000582537	-0.773626	0.429	0.548	1
CDK11A	0.000592345	0.274094	0.107	0.031	1
DERA	0.00059401	0.31784	0.19	0.075	1
MGA	0.000612539	0.385237	0.321	0.166	1
SLIRP	0.000620568	0.199243	0.119	0.037	1
RPL29	0.000620778	0.429767	0.179	0.071	1
CALM2	0.000630763	0.311031	0.31	0.153	1
KHDRBS1	0.000634945	0.5114	0.31	0.16	1
FAM174B	0.000638306	0.224785	0.167	0.063	1
TTC28	0.000641736	0.577134	0.655	0.458	1
STIM1	0.000650743	0.428277	0.357	0.196	1
GATAD2A	0.000650868	0.286462	0.25	0.115	1
SWAP70	0.000654327	0.569453	0.155	0.058	1
SLC40A1	0.000661408	0.401869	0.119	0.038	1
ARHGEF15	0.000661436	0.465625	0.083	0.021	1
HAT1	0.000664482	0.373264	0.155	0.057	1
TLE4	0.00066488	0.473563	0.226	0.102	1
DNAJC18	0.00066509	0.379016	0.083	0.021	1
ASMTL	0.00066509	0.361174	0.083	0.021	1
AC012409.2	0.000668763	0.380515	0.083	0.021	1
HIP1	0.000672025	0.606688	0.536	0.342	1
RAP1A	0.000678018	0.395067	0.44	0.254	1
FOS	0.000688493	-0.75841	0.429	0.54	1
AC025171.1	0.00069883	0.208376	0.083	0.021	1
DPP8	0.000700419	0.335298	0.238	0.108	1
PDIA5	0.000701791	0.221967	0.119	0.038	1
EMSY	0.000702519	0.342966	0.286	0.138	1
EPS15	0.000703108	0.393135	0.56	0.346	1
TMEM209	0.000706541	0.209473	0.083	0.021	1
MAPK14	0.000706803	0.156532	0.238	0.103	1
ANO10	0.000710322	0.393099	0.226	0.103	1
RPL13	0.000716395	0.432004	0.476	0.282	1
UTP14A	0.000718255	0.154503	0.083	0.021	1
RAI14	0.000718424	0.317067	0.131	0.044	1
ELMOD3	0.000722264	0.532937	0.131	0.045	1
MTMR10	0.000728796	0.348677	0.167	0.065	1
TRABD2B	0.000731741	0.64868	0.095	0.027	1
FXYD6	0.000735182	0.498699	0.155	0.058	1
HABP4	0.000742319	0.328802	0.202	0.086	1
TAB2	0.000749074	0.292474	0.298	0.144	1
CRIP1	0.000749981	0.260947	0.095	0.027	1
CD93	0.00075113	0.427414	0.131	0.045	1
ZFP36	0.000752059	-0.781558	0.06	0.209	1
SGTA	0.000752952	0.256278	0.167	0.064	1
WDR20	0.000754554	0.509224	0.274	0.137	1
SERTAD1	0.00075862	0.21991	0.083	0.021	1
TMEM30A	0.000758866	0.271492	0.179	0.071	1
RABEP1	0.000763282	0.43585	0.44	0.257	1
CLEC1A	0.000764877	0.258467	0.095	0.027	1
RNF114	0.000765799	0.223922	0.19	0.078	1
ADAMTS1	0.000769602	0.893406	0.357	0.212	1
CDC27	0.000773397	0.471825	0.31	0.163	1
MBD5	0.00077399	0.466449	0.75	0.552	1
STAC	0.000775225	0.425252	0.071	0.016	1
CARD10	0.000779013	0.26646	0.06	0.012	1
AC025259.3	0.000789981	0.235793	0.06	0.012	1
UBE2B	0.000790074	0.410905	0.429	0.249	1
MPPED2	0.000790605	0.597637	0.345	0.191	1
LINC01010	0.000792417	0.182825	0.083	0.021	1
ZNF846	0.000792832	0.282506	0.119	0.038	1
AL354733.3	0.000795519	0.173991	0.06	0.012	1
AGAP1	0.000797287	0.431044	0.679	0.474	1
BTG1	0.000798112	0.285222	0.107	0.032	1
ARL2BP	0.000801092	0.194237	0.06	0.012	1
RSRP1	0.000802673	0.388426	0.286	0.14	1
ROBO4	0.000807269	0.46498	0.095	0.027	1
ZNF500	0.000808852	0.229768	0.071	0.016	1
MEX3C	0.000808852	0.232156	0.071	0.016	1
RARS	0.000816499	0.263643	0.143	0.051	1
CHD1	0.000829095	0.423022	0.357	0.197	1
CUL3	0.000835383	0.377006	0.381	0.212	1
MIA3	0.000835849	0.31823	0.179	0.072	1
PARN	0.000840558	0.330136	0.262	0.124	1
SSUH2	0.000841134	0.208353	0.06	0.012	1
AL157786.1	0.000852911	0.158684	0.06	0.012	1
CD109	0.000853381	0.339739	0.143	0.051	1
NCOA1	0.000858275	0.496162	0.679	0.466	1
YIPF5	0.000858857	0.159783	0.06	0.012	1
ZNF341	0.000864375	0.258857	0.095	0.027	1
AC027097.2	0.000872705	0.193121	0.119	0.038	1
EVA1C	0.000874665	0.4314	0.345	0.188	1
RSRC2	0.000886984	0.362559	0.262	0.129	1
KLHL36	0.000888718	0.178286	0.107	0.032	1
IQSEC1	0.000892512	0.334189	0.333	0.174	1
N4BP2	0.000895678	0.333384	0.179	0.073	1
RGS12	0.000899002	0.250188	0.179	0.072	1
NIBAN1	0.000899948	-0.524526	0.75	0.812	1
CFAP161	0.000901636	0.122072	0.071	0.016	1
SERPINE2	0.000912533	0.134911	0.071	0.016	1
IFT27	0.000914124	0.0522814	0.06	0.012	1
PDCD6IP	0.000930904	0.394078	0.25	0.118	1
MPZL1	0.000941569	0.194879	0.155	0.058	1
RAC1	0.000953835	0.351524	0.19	0.08	1
AC005358.1	0.000957353	0.0791547	0.071	0.016	1
PLPP1	0.000959948	0.712593	0.464	0.306	1
IL32	0.000961592	0.293407	0.119	0.039	1
ACAP2	0.000969051	0.481051	0.345	0.192	1
ERLEC1	0.000973912	0.277467	0.131	0.045	1
MYO9A	0.000975176	0.524997	0.512	0.33	1
KMT2C	0.00097947	0.45638	0.631	0.462	1
AP3S1	0.000984616	0.40843	0.214	0.096	1
MIER1	0.00098808	0.330109	0.238	0.11	1
MACO1	0.000990804	0.304579	0.262	0.125	1
KIAA1841	0.000994443	0.489648	0.19	0.082	1
ATPSCKMT	0.000996286	0.138056	0.119	0.038	1
JARID2	0.00100359	0.427849	0.536	0.353	1
PGAP1	0.00100898	0.316027	0.143	0.052	1
HPCAL1	0.00101299	0.318222	0.167	0.066	1
CSRP2	0.00101312	0.436218	0.083	0.022	1
CARMN	0.00102434	0.750811	0.286	0.154	1
MIS18BP1	0.00105346	0.312999	0.143	0.052	1
LETMD1	0.00105372	0.34445	0.107	0.034	1
KDR	0.00108439	0.293734	0.083	0.022	1
APOLD1	0.0010847	0.550304	0.179	0.075	1
PARP9	0.00108814	0.229099	0.131	0.045	1
ARL5B	0.00109975	0.316199	0.143	0.052	1
CRIPT	0.00110148	0.177261	0.083	0.022	1
CDH6	0.00110148	0.371856	0.083	0.022	1
NMT1	0.00110713	0.395943	0.298	0.156	1
ZMYM2	0.00112184	0.400109	0.476	0.291	1
KCNB1	0.00112767	0.275778	0.095	0.028	1
CDC42BPA	0.00113047	0.618305	0.667	0.523	1
RPL18	0.00113904	0.349718	0.179	0.075	1
SLC14A1	0.00114233	0.245536	0.083	0.022	1
TACC2	0.00114375	-0.499143	0.738	0.813	1
TUT7	0.0011461	0.389449	0.202	0.09	1
MITF	0.00115209	-0.567626	0.56	0.674	1
CYP7B1	0.00115653	0.476917	0.167	0.067	1
RBPMS	0.00115679	0.430479	0.893	0.759	1
SLC38A9	0.00115846	0.235634	0.167	0.066	1
FIG4	0.00115918	0.466698	0.107	0.034	1
CHRM3	0.00116026	0.246428	0.083	0.022	1
CUL5	0.00117122	0.343634	0.321	0.17	1
LRRC8A	0.00117846	0.212997	0.131	0.045	1
CTDSPL	0.00117883	0.497886	0.345	0.196	1
PLD1	0.0011898	-0.655605	0.488	0.578	1
TBC1D9	0.00119408	0.412583	0.214	0.096	1
CCND3	0.00119831	0.483154	0.226	0.105	1
ZMYND11	0.00119925	0.435351	0.357	0.199	1
HIBCH	0.00119975	0.465866	0.321	0.171	1
RNF144B	0.00119987	0.360117	0.131	0.046	1
TTLL3	0.00120828	0.289337	0.119	0.041	1
YWHAQ	0.00120931	0.369805	0.345	0.19	1
GIT1	0.00120986	0.212634	0.095	0.028	1
INPP5B	0.00123174	0.305041	0.262	0.129	1
RNF144A	0.00124505	0.39767	0.238	0.114	1
THSD4	0.00125492	-0.376927	0.798	0.927	1
GDAP2	0.00126815	0.316916	0.143	0.053	1
CARD8	0.0012725	0.309129	0.167	0.067	1
KLF6	0.00127425	0.360064	0.238	0.11	1
ZBTB7C	0.0012762	0.715088	0.107	0.035	1
NCK1-DT	0.00129152	0.171458	0.095	0.028	1
NAB1	0.00129286	0.317074	0.143	0.053	1
RGS6	0.00130158	-0.490158	0.69	0.784	1
CDH19	0.00130226	-0.781785	0.024	0.151	1
SORBS1	0.00130661	-0.283981	0.905	0.973	1
AL133346.1	0.00131165	0.477746	0.071	0.017	1
LINC02208	0.00132139	-0.395798	0.893	0.917	1
SYN3	0.00133198	0.255897	0.131	0.046	1
ACTN4	0.00133417	0.39234	0.762	0.591	1
SMAD5	0.00134243	0.303422	0.214	0.096	1
TNKS	0.00134944	0.477269	0.476	0.299	1
KRAS	0.00136582	0.256855	0.119	0.041	1
FTX	0.00137601	0.430259	0.821	0.779	1
ADIPOR2	0.00138805	0.396818	0.298	0.156	1
MAP3K4	0.00138846	0.321098	0.333	0.178	1
ALPK3	0.00139854	-0.628989	0.452	0.578	1
CTNNB1	0.00139935	0.367349	0.476	0.297	1
IFIH1	0.00141232	0.333714	0.071	0.017	1
TUT4	0.00141366	0.377647	0.452	0.282	1
FAM160A2	0.0014198	0.324986	0.06	0.013	1
PEAK1	0.00142446	0.610585	0.655	0.484	1
TMEM135	0.0014258	0.315181	0.357	0.194	1
GMPS	0.0014306	0.381384	0.143	0.054	1
NCKAP1	0.00143685	0.444676	0.464	0.294	1
PLCB4	0.00143928	0.551752	0.786	0.662	1
GRB2	0.00145444	0.185062	0.202	0.088	1
EBF2	0.00145727	0.746814	0.214	0.102	1
NUCKS1	0.00146247	0.382204	0.488	0.308	1
RNF123	0.00147598	0.208247	0.06	0.013	1
MIR181A1HG	0.00148575	0.444805	0.155	0.063	1
MAT2B	0.00148613	0.1358	0.071	0.017	1
ST3GAL3	0.00149759	0.281416	0.464	0.276	1
CFAP97	0.00149765	0.105732	0.095	0.028	1
PHF21A	0.0015381	0.354125	0.548	0.352	1
ZNF583	0.00154412	0.138753	0.06	0.013	1
DENND6A	0.00155147	0.307752	0.274	0.139	1
AC025171.2	0.00155409	0.159276	0.06	0.013	1
KDM3B	0.00155675	0.41946	0.262	0.132	1
LASP1	0.00156142	0.257043	0.107	0.035	1
CHMP1B	0.00156349	0.0808385	0.071	0.017	1
TMEM44	0.00156411	0.184599	0.06	0.013	1
ANKRD13C	0.00156558	0.367771	0.25	0.123	1
TTF2	0.00157129	0.250809	0.083	0.023	1
RFLNB	0.0015742	0.196167	0.06	0.013	1
VIRMA	0.00157619	0.208951	0.167	0.067	1
RPL41	0.00158313	0.540684	0.369	0.218	1
DNTTIP2	0.00160482	0.136033	0.06	0.013	1
FAM111A	0.00160805	0.0731255	0.071	0.017	1
FHL2	0.00162146	-0.600005	0.75	0.845	1
BCL3	0.00162553	0.123355	0.06	0.013	1
MYH9	0.0016262	0.449938	0.679	0.467	1
PTPRK	0.00163355	0.334676	0.869	0.694	1
AP2M1	0.00163548	0.254319	0.143	0.054	1
CARD19	0.00163598	0.103518	0.06	0.013	1
AC008050.1	0.0016482	0.251597	0.107	0.035	1
FAM241A	0.00165558	0.30943	0.238	0.116	1
AMD1	0.00166617	0.272805	0.298	0.153	1
ZFAND2B	0.0016677	0.0692537	0.06	0.013	1
TP63	0.00170108	0.341896	0.083	0.023	1
KLF12	0.00172721	0.546133	0.667	0.527	1
AC005670.3	0.00175267	0.444993	0.238	0.117	1
SLTM	0.00175545	0.457965	0.536	0.352	1
ETV6	0.00175909	0.497633	0.524	0.366	1
AL136171.2	0.00177292	-0.751561	0.25	0.386	1
GNAI1	0.00177569	0.28834	0.155	0.061	1
CNOT10	0.00181031	0.280725	0.202	0.09	1
CEP85L	0.00181137	0.425443	0.536	0.365	1
FP236383.3	0.00181143	0.145813	0.143	0.053	1
ANKRD12	0.00181669	0.329827	0.679	0.45	1
EOGT	0.00184604	0.257355	0.143	0.056	1
MEG3	0.00184726	-0.661235	0.012	0.124	1
NMT2	0.00185669	0.219795	0.167	0.068	1
HERPUD2	0.00186027	0.433931	0.167	0.07	1
CACNB2	0.00189483	-0.364659	0.857	0.918	1
TCHP	0.00190215	0.321742	0.131	0.049	1
NCAM1	0.00191162	-0.549413	0.679	0.723	1
PAN3	0.0019139	0.567835	0.357	0.219	1
HIPK2	0.00191557	0.559296	0.655	0.518	1
DUSP16	0.00191889	0.357563	0.321	0.173	1
CHMP1A	0.00192375	0.132535	0.083	0.023	1
SYNJ1	0.00192506	0.397212	0.155	0.064	1
BACH2	0.00193927	0.509733	0.333	0.182	1
ABCA8	0.00194755	-0.828306	0.107	0.241	1
TNNC1	0.00195302	-0.769408	0.262	0.406	1
ZC3H14	0.00197983	0.392919	0.179	0.08	1
OXR1	0.00198819	0.499617	0.262	0.136	1
ROCK1	0.00198988	0.391122	0.464	0.29	1
HSDL1	0.00199072	0.0642447	0.083	0.023	1
SIRT1	0.00201092	0.310761	0.155	0.063	1
ALG5	0.00202915	0.194556	0.107	0.036	1
ZNF644	0.00203211	0.298964	0.524	0.317	1
KCNMB2	0.0020346	-0.769001	0.417	0.539	1
PTGDS	0.00203593	-0.561477	0.357	0.496	1
CD2AP	0.00203734	0.861078	0.25	0.134	1
TOP2B	0.00204395	0.266375	0.286	0.147	1
CD74	0.00204693	0.462188	0.202	0.094	1
ADD1	0.00205208	0.457829	0.333	0.191	1
ABCA10	0.00207596	-0.642129	0.024	0.141	1
CORO2B	0.00208718	0.313574	0.107	0.036	1
SPPL3	0.00208966	0.366251	0.464	0.291	1
RBP7	0.0020899	0.411129	0.071	0.019	1
CEP57	0.00209225	0.403088	0.155	0.064	1
YIPF3	0.00210115	0.270859	0.071	0.019	1
ROR1	0.00211342	-0.503816	0.488	0.622	1
AC011997.2	0.00212383	0.178734	0.071	0.019	1
RIN3	0.00213	0.439577	0.202	0.094	1
LIN52	0.00213036	0.357824	0.274	0.144	1
PDIA6	0.00213065	0.254775	0.143	0.056	1
NAP1L4	0.00213342	0.413818	0.298	0.159	1
THOC2	0.00214197	0.51407	0.369	0.217	1
ZNFX1	0.00215032	0.179821	0.119	0.042	1
TEP1	0.00215827	0.291504	0.071	0.019	1
GTF2B	0.00217357	0.649661	0.143	0.057	1
CROCC	0.00218145	0.262257	0.107	0.036	1
STX12	0.00219525	0.262168	0.226	0.109	1
KNOP1	0.00220783	0.271672	0.107	0.036	1
ADCY5	0.00223606	-0.518041	0.69	0.753	1
GIPC2	0.00224138	0.285574	0.179	0.078	1
TYW5	0.00225888	0.280927	0.083	0.024	1
LARGE1	0.00226333	-0.317286	0.857	0.913	1
HES4	0.00226468	0.206174	0.071	0.019	1
HLA-F	0.00226963	0.429655	0.083	0.024	1
SPEN	0.00227403	0.332095	0.298	0.159	1
AC009961.1	0.00227628	0.199652	0.143	0.056	1
CAMK2G	0.00228738	0.496893	0.119	0.044	1
SRSF10	0.00229076	0.43541	0.19	0.089	1
RPP38	0.00229394	0.328237	0.131	0.05	1
MPRIP	0.00229515	0.473509	0.429	0.265	1
FLNC	0.00230087	-0.761504	0.357	0.475	1
IL3RA	0.00230214	0.329936	0.083	0.024	1
TP53I11	0.00233509	0.234785	0.083	0.024	1
EFCAB13	0.00234617	0.301823	0.083	0.024	1
RASSF1	0.00235914	0.24215	0.095	0.03	1
ADAMTSL1	0.00236051	0.289117	0.155	0.063	1
ARHGAP5	0.00236516	0.314296	0.56	0.355	1
IQCB1	0.00237417	0.378835	0.155	0.065	1
PDE7B	0.00238793	0.439027	0.631	0.423	1
NR5A2	0.00240126	0.210354	0.071	0.019	1
ABCG1	0.00240196	0.336954	0.167	0.071	1
SUGT1	0.00240196	0.305357	0.167	0.071	1
PPP6R1	0.00242082	0.251331	0.095	0.03	1
TOPBP1	0.00243653	0.23628	0.083	0.024	1
NRP2	0.00245961	0.247577	0.083	0.024	1
AC092353.2	0.00246771	-0.325409	0.81	0.9	1
SPCS3	0.00247094	0.332638	0.155	0.065	1
AVIL	0.00247333	0.211682	0.095	0.03	1
DMPK	0.00247353	0.395122	0.214	0.102	1
BHLHE40	0.0024779	0.390239	0.202	0.094	1
RFX7	0.00248157	0.345282	0.286	0.153	1
AP2A1	0.00248338	0.231337	0.131	0.05	1
WIPF3	0.00249812	0.562365	0.131	0.051	1
PPP1R12A	0.00249924	0.579215	0.5	0.343	1
GOLGA2	0.00250115	0.251147	0.143	0.057	1
FGD3	0.00250529	0.0634173	0.071	0.019	1
ZNF106	0.0025342	-0.586521	0.476	0.559	1
WNT2B	0.00254199	0.223046	0.083	0.024	1
GPATCH8	0.0025443	0.410686	0.571	0.407	1
IL15RA	0.002545	0.236464	0.06	0.014	1
ELN	0.00254861	0.238921	0.095	0.03	1
HECW2	0.00255578	0.549524	0.548	0.392	1
ALG13	0.00257476	0.473547	0.214	0.105	1
SAMD9L	0.00257806	0.135102	0.083	0.024	1
MOV10	0.00259115	0.189852	0.06	0.014	1
CBL	0.00259766	0.216241	0.179	0.079	1
SEPTIN9	0.00262535	0.419322	0.214	0.104	1
GABRA4	0.00262629	-0.461197	0	0.098	1
ARFGEF1	0.00262849	0.38672	0.488	0.314	1
C2orf76	0.00265161	0.226447	0.083	0.024	1
AC105450.1	0.00265388	0.269318	0.06	0.014	1
APP	0.00266026	0.398966	0.536	0.353	1
TMEM33	0.00268282	0.217156	0.119	0.043	1
PPP1R3C	0.00268388	-0.962583	0.083	0.207	1
AGMO	0.0026842	0.388997	0.119	0.044	1
ACOT11	0.00268672	-0.345018	0.655	0.737	1
RASSF3	0.002711	0.363963	0.321	0.177	1
RPS7	0.00271778	0.22117	0.179	0.078	1
ACSM3	0.00271911	-0.645056	0.012	0.117	1
CCSER1	0.00271924	-0.428927	0.667	0.812	1
TRERF1	0.00273307	0.41555	0.119	0.044	1
PRTG	0.00273984	0.175751	0.083	0.024	1
EML1	0.0027442	0.534692	0.333	0.195	1
ANKRD36C	0.0027457	0.294394	0.25	0.126	1
RBMX	0.00278953	0.370574	0.512	0.333	1
DISP1	0.00279366	0.495393	0.179	0.079	1
SLC25A13	0.00279448	0.288017	0.345	0.198	1
NRN1	0.00280013	0.156021	0.06	0.014	1
SLC22A3	0.00280013	0.221542	0.06	0.014	1
NFASC	0.00280185	0.570812	0.143	0.059	1
LRRC41	0.00280428	0.348571	0.167	0.073	1
TEFM	0.00281682	0.0809554	0.06	0.014	1
EIF1AX	0.00282613	0.138463	0.19	0.085	1
SNIP1	0.00283361	0.153516	0.06	0.014	1
SEL1L3	0.00283361	0.123889	0.06	0.014	1
CACNA2D3	0.00284146	-0.810905	0.321	0.43	1
PKP2	0.00284588	-0.446722	0.548	0.632	1
ITSN2	0.00287281	0.42552	0.512	0.336	1
MTHFD1L	0.00288964	0.403097	0.131	0.051	1
MED23	0.00292561	0.179521	0.131	0.05	1
DSTN	0.00294322	0.521961	0.31	0.177	1
NFATC2IP	0.0029531	0.405502	0.179	0.081	1
C5orf24	0.00295788	0.353772	0.119	0.044	1
TBC1D24	0.00297123	0.0582398	0.06	0.014	1
CHD3	0.00297123	0.051109	0.06	0.014	1
LRRN2	0.00300657	0.0634706	0.06	0.014	1
MET	0.00301473	0.0949898	0.19	0.085	1
MTPN	0.00302753	0.174705	0.167	0.071	1
PDE1C	0.00303832	-0.358225	0.857	0.885	1
ZNF254	0.00304355	0.208241	0.31	0.163	1
SORBS2	0.00305781	-0.314841	0.976	0.993	1
IPO9	0.00307227	0.257358	0.202	0.095	1
RTF1	0.00308614	0.186135	0.214	0.1	1
NTN4	0.00309182	0.647272	0.298	0.171	1
ANKRD33B	0.0030959	0.265413	0.179	0.079	1
SRSF3	0.00310481	0.308968	0.333	0.187	1
AP001528.1	0.00311661	0.536667	0.143	0.058	1
CD58	0.0031193	0.220056	0.25	0.125	1
SMYD4	0.00312154	0.398564	0.143	0.058	1
FAM177A1	0.00315041	0.34313	0.202	0.096	1
C5orf56	0.00315259	0.374101	0.345	0.199	1
PPIP5K2	0.00315854	0.351261	0.238	0.119	1
GUCY1B1	0.00318123	0.284533	0.143	0.058	1
RAP1GDS1	0.003183	0.333408	0.321	0.178	1
LRRC40	0.00321803	0.113808	0.155	0.064	1
FAM172A	0.00321986	0.414723	0.56	0.392	1
KMT2A	0.00323045	0.540772	0.357	0.214	1
FLII	0.00325623	0.168062	0.107	0.037	1
MICOS13	0.00326985	0.220034	0.095	0.031	1
HEXA	0.00330641	0.35622	0.155	0.066	1
CSNK2B	0.0033091	0.320502	0.071	0.02	1
RNF8	0.0033091	0.196708	0.071	0.02	1
MMP2	0.0033214	-0.802308	0.06	0.176	1
USP32	0.00333871	0.410327	0.357	0.21	1
RDH11	0.0033427	0.218142	0.071	0.02	1
PRKX	0.00335615	0.25337	0.083	0.025	1
AC004943.2	0.00335962	0.270292	0.071	0.02	1
MMP24OS	0.00336239	0.187457	0.119	0.044	1
MFSD14B	0.00341483	0.22702	0.131	0.051	1
SLC12A4	0.00341533	0.221241	0.155	0.065	1
SESN3	0.00344808	0.25959	0.083	0.025	1
AC021752.1	0.00346277	0.156787	0.071	0.02	1
METAP2	0.0034707	0.298654	0.19	0.088	1
TC2N	0.00347521	0.416875	0.107	0.038	1
COL3A1	0.00347536	-0.711575	0.048	0.167	1
MT-ND5	0.00348669	-0.371637	0.869	0.948	1
SNHG5	0.00349162	-0.926874	0.131	0.253	1
PITPNB	0.00349296	0.230404	0.25	0.127	1
GDI2	0.00349686	0.152972	0.19	0.087	1
TMEM62	0.00350144	0.287677	0.107	0.038	1
SCFD2	0.00350793	0.616955	0.345	0.21	1
RCC2	0.00352644	0.221442	0.083	0.025	1
PITHD1	0.00353313	0.231015	0.071	0.02	1
ABCA6	0.00353934	-0.542411	0.012	0.112	1
LHFPL2	0.00354113	0.304353	0.107	0.038	1
PPP3CC	0.00355963	0.490484	0.321	0.187	1
RTN4	0.0035725	0.525372	0.262	0.146	1
LHFPL6	0.00357385	0.517211	0.845	0.744	1
FHIT	0.00357913	-0.45563	0.798	0.823	1
ARF3	0.00357936	0.173127	0.095	0.031	1
BTF3L4	0.00358555	0.165087	0.155	0.064	1
GALNT2	0.00358893	0.385922	0.214	0.107	1
SLC37A1	0.0036229	0.141688	0.071	0.02	1
KSR1	0.00363841	0.178608	0.095	0.031	1
KCNMB4	0.00365939	0.208966	0.071	0.02	1
AL158071.4	0.00366856	0.125024	0.071	0.02	1
MEOX1	0.00368803	0.227968	0.083	0.025	1
AC074032.1	0.00369732	0.330665	0.167	0.073	1
CTDSPL2	0.00370738	0.404067	0.262	0.143	1
PIP4K2A	0.00372838	0.299494	0.226	0.112	1
ATXN2	0.00375358	0.284305	0.524	0.338	1
CDKAL1	0.00378684	0.498105	0.548	0.409	1
P3H1	0.00378975	0.109589	0.071	0.02	1
ZNF568	0.0037917	0.432596	0.143	0.061	1
TECRL	0.00379997	-0.552404	0.774	0.78	1
TIMP3	0.00383464	0.382115	0.643	0.473	1
PGK1	0.00385605	0.391377	0.202	0.097	1
PHF14	0.00391541	0.5883	0.31	0.183	1
UBE2V1	0.0039251	0.258916	0.202	0.096	1
NFYA	0.00394339	0.322428	0.095	0.032	1
EAPP	0.00394892	0.254752	0.119	0.045	1
ATL3	0.00397972	0.362637	0.107	0.039	1
MAPKAP1	0.00403589	0.41623	0.417	0.264	1
BAIAP2L1	0.00408554	0.0923863	0.083	0.025	1
LRRC23	0.00412187	0.0823066	0.083	0.025	1
LGALS3	0.00412629	0.176003	0.202	0.095	1
TM9SF3	0.00413186	0.25018	0.31	0.17	1
SLC27A6	0.00413773	-0.649619	0.333	0.437	1
MT-CO2	0.00414099	0.452274	0.988	0.997	1
CRYAB	0.00414722	-0.700352	0.298	0.406	1
ESYT1	0.00415851	0.0480939	0.083	0.025	1
CHST12	0.00415899	0.138945	0.131	0.051	1
ZNF83	0.00419751	0.37411	0.167	0.075	1
ECD	0.0042275	0.39926	0.143	0.061	1
AC132803.1	0.00424949	0.115177	0.143	0.058	1
DLG1	0.00427694	0.3536	0.5	0.322	1
VTI1A	0.00428345	0.441064	0.548	0.362	1
AC135050.3	0.00429216	0.258738	0.06	0.015	1
CPD	0.00430806	0.431634	0.179	0.083	1
SMC6	0.00434188	0.360884	0.274	0.152	1
CDK14	0.00434441	0.579655	0.536	0.36	1
FOSB	0.00445854	-0.817031	0.143	0.265	1
CD9	0.0044622	0.335336	0.131	0.053	1
TOLLIP	0.004484	0.279887	0.083	0.027	1
NTNG1	0.00448712	0.258141	0.06	0.015	1
SRSF7	0.00450061	0.337813	0.119	0.046	1
SOX17	0.0045371	0.170183	0.06	0.015	1
PARP2	0.00458758	0.167145	0.06	0.015	1
N4BP1	0.00459655	0.241991	0.25	0.13	1
EHD1	0.0046016	0.247195	0.083	0.027	1
RHOD	0.00461301	0.173399	0.06	0.015	1
MRPL16	0.00463857	0.126042	0.06	0.015	1
NDE1	0.00465604	0.21462	0.131	0.052	1
MBNL2	0.00467442	0.352457	0.5	0.328	1
ANO5	0.00468256	-0.376729	0.44	0.561	1
GCNA	0.00469007	0.154086	0.06	0.015	1
TMPO	0.00472412	0.216206	0.095	0.032	1
NRIP1	0.00474033	0.300603	0.321	0.187	1
CASP4	0.00475136	0.28096	0.071	0.021	1
ATR	0.00475612	0.407807	0.262	0.145	1
TYW1B	0.00476678	0.519383	0.262	0.146	1
OBSCN	0.00478374	-0.442918	0.655	0.751	1
RAB30-DT	0.0047853	0.363542	0.19	0.094	1
SPTLC3	0.0047858	0.344598	0.155	0.068	1
MRPS18B	0.00480849	0.113674	0.095	0.032	1
RIN2	0.00481612	0.307547	0.762	0.552	1
JDP2	0.00482217	0.449675	0.31	0.178	1
GOLGA8A	0.00482742	0.171485	0.095	0.032	1
KLF8	0.00484315	0.291479	0.071	0.021	1
PAPSS2	0.00484642	0.163627	0.095	0.032	1
EIF2S2	0.00484905	0.120876	0.119	0.045	1
SNX14	0.00486108	0.51086	0.286	0.166	1
CHM	0.00486376	0.0796851	0.226	0.11	1
DNA2	0.00486603	0.183469	0.083	0.027	1
PPM1H	0.00487716	0.563333	0.202	0.102	1
MRPS18C	0.00488964	0.298758	0.071	0.021	1
MIR222HG	0.00488964	0.247015	0.071	0.021	1
MRPS18A	0.00490129	0.0902486	0.06	0.015	1
DLK1	0.00491266	-0.572856	0.012	0.109	1
CATSPERB	0.00492829	0.12217	0.06	0.015	1
GUCY1A2	0.00493888	1.0214	0.155	0.072	1
USP31	0.00495547	0.226757	0.238	0.122	1
VAMP4	0.00496014	0.245197	0.071	0.021	1
SRP19	0.004962	0.263892	0.119	0.046	1
ATP6V1C1	0.004962	0.280237	0.119	0.046	1
ATP9A	0.00497481	0.194642	0.167	0.074	1
SCN5A	0.00500524	-0.58674	0.452	0.53	1
FYB2	0.0050158	-0.69362	0.298	0.414	1
SPOP	0.0050202	0.253902	0.369	0.218	1
SLC45A4	0.00503351	0.186092	0.226	0.112	1
GTF2A2	0.0050787	0.143469	0.083	0.027	1
MT-CYB	0.00508152	-0.257559	1	1	1
ALG10B	0.00509313	0.0294773	0.06	0.015	1
ENAH	0.00511955	0.600669	0.452	0.313	1
ORMDL1	0.00512223	0.190658	0.083	0.027	1
USP33	0.00512356	0.25672	0.262	0.139	1
RERG	0.00512969	0.513501	0.131	0.054	1
GNB2	0.0051661	0.205273	0.083	0.027	1
PPP1R21	0.00519743	0.317311	0.167	0.076	1
CADPS	0.00521486	-0.644863	0.333	0.448	1
EPB41L1	0.00522658	0.181067	0.071	0.021	1
RIOK1	0.00525143	0.168629	0.071	0.021	1
AP001347.1	0.00526781	0.23342	0.095	0.034	1
TMEM94	0.00529974	0.173848	0.083	0.027	1
SHC1	0.00530145	0.163344	0.071	0.021	1
HNRNPDL	0.00530421	0.363687	0.238	0.124	1
ABHD15-AS1	0.00531402	0.138533	0.071	0.021	1
ACTR2	0.00534416	0.3806	0.202	0.102	1
NOTCH3	0.00540659	0.452538	0.143	0.063	1
GCNT1	0.00540662	0.119566	0.095	0.032	1
PTPN13	0.00540868	0.692185	0.083	0.028	1
PCM1	0.0054385	0.328851	0.476	0.313	1
AAGAB	0.00545297	0.240488	0.095	0.034	1
ALPK2	0.00545393	-0.679416	0.369	0.465	1
BMP1	0.00545961	0.12782	0.083	0.027	1
TMBIM6	0.00547711	0.351754	0.226	0.117	1
JUNB	0.0055084	0.452784	0.286	0.165	1
LINC01428	0.00551049	-0.65238	0.333	0.46	1
USP3	0.00554137	0.371955	0.214	0.109	1
SGK1	0.00555093	0.170541	0.107	0.039	1
UFM1	0.00557558	0.177301	0.119	0.046	1
VOPP1	0.00558463	0.272108	0.19	0.093	1
TMEM120A	0.00558761	0.328043	0.143	0.061	1
CHD9	0.005634	0.32772	0.619	0.425	1
COMMD7	0.00565052	0.161894	0.107	0.039	1
TRIO	0.00565543	0.414717	0.75	0.576	1
ITPR2	0.00568322	0.604317	0.512	0.358	1
POU6F1	0.00569055	0.142743	0.071	0.021	1
MYO19	0.00569697	0.19966	0.155	0.068	1
AFTPH	0.00570074	0.277913	0.25	0.132	1
GAB2	0.00570606	0.392071	0.333	0.202	1
RPS27	0.00571434	0.325443	0.31	0.18	1
IL17RC	0.00573081	0.254559	0.095	0.034	1
VEZT	0.00577787	0.245874	0.345	0.2	1
SZRD1	0.00578259	0.147821	0.131	0.053	1
TAF1D	0.0058218	0.352529	0.19	0.095	1
PIAS4	0.00583388	0.087282	0.107	0.039	1
AL050309.1	0.00583794	0.219755	0.143	0.061	1
C21orf91	0.00585327	0.0851306	0.071	0.021	1
TMEM165	0.00586323	0.324644	0.274	0.155	1
HLA-B	0.00587312	0.369685	0.369	0.226	1
KATNBL1	0.00590173	0.325787	0.238	0.126	1
FNBP1L	0.00597596	0.31439	0.31	0.178	1
PPP3R1	0.00599329	0.321483	0.286	0.161	1
POLK	0.0059978	0.289006	0.226	0.117	1
YWHAZ	0.00600488	0.323918	0.548	0.373	1
C2CD5	0.00601761	0.304726	0.286	0.163	1
SNRPG	0.00602135	0.202527	0.095	0.034	1
BPTF	0.00602176	0.312148	0.607	0.424	1
PRDM4	0.00602562	0.317591	0.083	0.028	1
CDK19	0.00604612	0.241114	0.25	0.132	1
ODF2L	0.00605943	0.422846	0.143	0.064	1
ASCC3	0.00608113	0.511574	0.345	0.211	1
CHCHD6	0.00611606	0.258815	0.25	0.134	1
RABEPK	0.00614348	0.0678348	0.083	0.027	1
TENT5A	0.00619402	-0.596911	0.31	0.438	1
SNHG14	0.00619514	-0.389216	0.75	0.773	1
USP24	0.00619589	0.308561	0.321	0.191	1
SPTY2D1	0.00620667	0.229263	0.095	0.034	1
EGFR	0.00620689	0.556365	0.238	0.13	1
EGFLAM	0.00621993	0.922782	0.131	0.058	1
TENM3	0.00628851	0.267485	0.274	0.149	1
NAMPT	0.00628977	0.157328	0.31	0.177	1
XKR6	0.00630542	0.524427	0.274	0.155	1
YAP1	0.00631205	0.51543	0.417	0.289	1
MYOM3	0.00631359	-0.535399	0.631	0.713	1
NSF	0.00631499	0.249668	0.119	0.048	1
CDK13	0.00635053	0.383448	0.476	0.317	1
CYP1B1-AS1	0.00635783	0.337118	0.071	0.022	1
FMNL2	0.00636567	0.487667	0.274	0.154	1
SEC14L5	0.006367	0.3578	0.119	0.049	1
DEPTOR	0.00638403	0.318122	0.155	0.071	1
FHL5	0.00639201	0.317835	0.06	0.016	1
SCAF4	0.00643095	0.218951	0.202	0.102	1
MZT2B	0.00643888	0.2746	0.119	0.048	1
COX17	0.00647083	0.200275	0.107	0.041	1
CNOT1	0.00647424	0.26651	0.321	0.182	1
COL1A2	0.0064816	-0.647286	0.048	0.154	1
MSL1	0.00649331	0.215153	0.107	0.041	1
EXT1	0.00650256	0.545658	0.595	0.435	1
B4GALT6	0.00654256	0.158614	0.083	0.028	1
CHIC1	0.00655991	0.340518	0.155	0.071	1
BTBD3	0.00658622	0.186536	0.179	0.083	1
KRTAP5-AS1	0.00659639	0.153338	0.083	0.028	1
ILKAP	0.00664505	0.251633	0.167	0.078	1
PRR12	0.00669325	0.200047	0.119	0.048	1
FBXW2	0.00671282	0.215871	0.155	0.071	1
GPHN	0.00672835	0.412231	0.75	0.592	1
C8orf33	0.00673321	0.188149	0.06	0.016	1
FAM107B	0.00674448	0.386455	0.119	0.049	1
TSFM	0.00676822	0.176871	0.06	0.016	1
NDUFB6	0.00677155	-0.468921	0	0.081	1
CEP57L1	0.00677967	0.355424	0.155	0.072	1
KCNN3	0.00679386	0.0785965	0.095	0.034	1
NALCN	0.00680591	-0.70634	0.262	0.367	1
IPO5	0.00682628	0.215799	0.155	0.07	1
TMEM154	0.00683749	0.333591	0.071	0.022	1
ATF7IP	0.00684177	0.359067	0.405	0.255	1
ELMSAN1	0.00684561	0.154118	0.155	0.068	1
MYCBP2	0.00685751	0.355096	0.417	0.277	1
TERF1	0.00689663	0.260274	0.119	0.049	1
JAK1	0.00689804	0.409424	0.512	0.35	1
CEP89	0.00689963	0.235922	0.083	0.028	1
DLC1	0.00695473	1.29682	0.714	0.618	1
SRRM1	0.00695922	0.236851	0.476	0.306	1
MSI2	0.00697674	-0.479569	0.607	0.683	1
C1GALT1	0.00700251	0.219601	0.179	0.086	1
DHX36	0.00702022	0.269546	0.226	0.118	1
VHL	0.00704984	0.264733	0.095	0.035	1
DCLRE1C	0.00705738	0.216538	0.071	0.022	1
CADM1	0.00707577	-0.635979	0.345	0.455	1
ATXN3	0.00710699	0.246587	0.214	0.109	1
POU2F1	0.00714537	0.407056	0.357	0.228	1
INF2	0.00714586	0.34254	0.107	0.042	1
ERGIC2	0.00717017	0.299423	0.107	0.042	1
PBRM1	0.00718094	0.357243	0.429	0.277	1
RRAS2	0.00720876	0.160474	0.333	0.192	1
KIAA1328	0.00723388	0.280643	0.345	0.202	1
MCUB	0.00723841	0.168273	0.06	0.016	1
ILK	0.00724874	0.195705	0.143	0.063	1
ELOVL5	0.00724991	0.405656	0.333	0.209	1
RUVBL2	0.00731329	0.136921	0.06	0.016	1
C1orf54	0.00731329	0.136981	0.06	0.016	1
POF1B	0.00731329	0.154436	0.06	0.016	1
TTC23	0.00731464	0.376764	0.19	0.094	1
MAP2K6	0.00731644	0.17274	0.071	0.022	1
GOSR2	0.00732558	0.139445	0.107	0.041	1
ACTA2	0.00734324	1.11815	0.155	0.073	1
MGAT4A	0.00736577	0.232907	0.214	0.11	1
RBM33	0.00737402	0.274129	0.357	0.211	1
APMAP	0.00738253	0.153913	0.071	0.022	1
RSL24D1	0.00738887	0.0950945	0.06	0.016	1
ZNF418	0.00738887	0.0821944	0.06	0.016	1
ARHGAP28	0.00741577	0.197791	0.071	0.022	1
EIF4G3	0.00743019	0.441481	0.476	0.327	1
KATNAL1	0.00744524	0.32749	0.155	0.072	1
RBBP5	0.00745199	0.0657691	0.107	0.041	1
ADAMTS12	0.0074633	0.280002	0.095	0.035	1
AC005699.1	0.00750355	0.129312	0.06	0.016	1
ZC3H13	0.00753566	0.219163	0.333	0.196	1
FRMD3	0.00754106	0.773397	0.286	0.175	1
KCND3	0.0075637	-0.57369	0.548	0.583	1
EPC2	0.00761717	0.311344	0.405	0.256	1
SNX16	0.00764307	0.164516	0.095	0.035	1
GTF2IRD2B	0.00770102	0.148849	0.226	0.118	1
RSU1	0.00770843	0.446608	0.357	0.231	1
TENT4B	0.00771318	0.238292	0.19	0.095	1
METTL5	0.00772877	0.0982204	0.083	0.028	1
ERBB4	0.00773176	-0.363718	0.714	0.797	1
CCDC18	0.0077557	0.216396	0.083	0.029	1
ZCCHC10	0.00776713	0.100917	0.131	0.054	1
DMTF1	0.00778855	0.419285	0.25	0.141	1
RBM5	0.00781208	0.337769	0.286	0.166	1
DST	0.00785701	-0.278172	0.929	0.941	1
TPCN1	0.00787015	-0.668408	0.345	0.431	1
NT5C2	0.00790813	0.305762	0.524	0.351	1
RAB11A	0.00795733	0.426188	0.143	0.065	1
LCORL	0.00797637	0.313519	0.274	0.158	1
PKN2	0.00800162	0.274263	0.417	0.258	1
LPCAT3	0.00801766	0.243653	0.179	0.086	1
TRAPPC12	0.00802715	0.204693	0.357	0.209	1
UBTF	0.00802911	0.0953681	0.119	0.048	1
CYFIP1	0.00804017	0.305122	0.202	0.105	1
MYL7	0.00805585	-0.78516	0.107	0.216	1
PLK2	0.00810146	0.210301	0.119	0.049	1
MYO18A	0.00811106	-0.501619	0.321	0.45	1
SMC4	0.00811607	0.432771	0.119	0.05	1
NRP1	0.00814124	0.609068	0.774	0.683	1
RPL28	0.00814509	0.254238	0.238	0.129	1
TRIM37	0.00817151	0.214618	0.143	0.064	1
ZCCHC7	0.00817435	0.436486	0.571	0.417	1
TPP2	0.00817962	0.275095	0.238	0.126	1
KPNA5	0.00818634	0.220653	0.131	0.056	1
FBXL5	0.00820383	0.470304	0.202	0.105	1
RCL1	0.00821056	0.0472827	0.107	0.041	1
STRAP	0.00822066	0.332198	0.131	0.057	1
UHRF2	0.00822414	0.175834	0.214	0.11	1
CAMTA1	0.00823141	0.227392	0.417	0.261	1
PTPRA	0.00823787	0.370096	0.405	0.262	1
MYH7B	0.00825377	-0.328671	0.631	0.724	1
CHORDC1	0.0082585	0.264081	0.19	0.096	1
SCAMP1	0.00835494	0.236381	0.143	0.064	1
PGM5	0.0083593	0.305682	0.56	0.397	1
ANO1	0.00839328	0.333573	0.083	0.029	1
MYEF2	0.00839328	0.203197	0.083	0.029	1
STIMATE	0.00842636	0.29549	0.083	0.029	1
PRPF39	0.00843204	0.0958001	0.095	0.035	1
CSRNP1	0.00847758	0.0826133	0.071	0.022	1
MTREX	0.00849036	0.3784	0.25	0.141	1
EIF4EBP2	0.00849776	0.299282	0.155	0.072	1
SLCO3A1	0.00854393	0.277256	0.786	0.599	1
CAPZA1	0.00871031	0.258932	0.25	0.137	1
UGGT2	0.00878437	0.39308	0.298	0.178	1
DDX5	0.00879791	0.43067	0.536	0.387	1
KIAA2026	0.00880607	0.356497	0.274	0.162	1
HMCES	0.00885118	0.467862	0.119	0.051	1
SLC35A3	0.00885971	0.131187	0.107	0.042	1
MGP	0.00891343	-0.802227	0.131	0.24	1
SPOPL	0.00893997	0.634991	0.155	0.073	1
ERO1B	0.00895512	0.200932	0.179	0.087	1
TTLL7	0.00897167	0.22565	0.083	0.029	1
GALNT1	0.00899664	0.335717	0.25	0.143	1
CAMSAP2	0.0090018	0.586864	0.31	0.192	1
AC007038.1	0.00905004	0.289908	0.095	0.036	1
PPP4R3B	0.00906895	0.216916	0.19	0.096	1
DAAM1	0.00907928	-0.562956	0.405	0.502	1
TCF20	0.00911496	0.281858	0.167	0.081	1
SLC4A4	0.00912923	-0.652225	0.381	0.467	1
BRAF	0.00920357	0.326612	0.56	0.393	1
SFSWAP	0.00920604	0.323664	0.274	0.159	1
DHDDS	0.00920822	0.213115	0.107	0.043	1
XPO7	0.00921823	0.440873	0.19	0.098	1
HECTD1	0.00922125	0.335104	0.345	0.219	1
DDX46	0.00922708	0.293055	0.262	0.146	1
BRD2	0.0092322	0.362925	0.238	0.131	1
TPRG1	0.0092384	0.216682	0.107	0.043	1
AC138904.3	0.00925141	-0.716534	0.071	0.173	1
TULP3	0.00926017	0.154377	0.119	0.049	1
PPM1F	0.00927145	0.248102	0.071	0.023	1
ERICH1	0.00927732	0.232317	0.095	0.036	1
UCK2	0.00936003	0.281558	0.107	0.043	1
GOLGA5	0.00936463	0.146688	0.083	0.029	1
EXOC2	0.00936844	0.337984	0.298	0.173	1
SPOUT1	0.00939186	0.240159	0.071	0.023	1
ABCD4	0.00940111	0.212109	0.083	0.029	1
GAPVD1	0.00941669	0.271273	0.262	0.147	1
SON	0.00942669	0.247942	0.595	0.408	1
AP002495.1	0.00943231	0.21472	0.071	0.023	1
RASGRP3	0.00947291	0.278521	0.512	0.344	1
MDH1	0.00948396	-0.524647	0.155	0.277	1
BAZ2B	0.00959924	0.390205	0.655	0.516	1
PCDH7	0.00960354	-0.449088	0.774	0.819	1
RPS6KA2	0.00961199	0.689642	0.345	0.239	1
ADAMTS6	0.00961609	0.152748	0.167	0.079	1
KDELR1	0.00962263	0.138851	0.083	0.029	1
WDFY3	0.00963508	0.286314	0.44	0.299	1
NTM	0.0096504	-0.539232	0.036	0.136	1
CD59	0.00966183	0.180731	0.274	0.153	1
IGFBP4	0.00966242	0.272898	0.214	0.114	1
AL356218.2	0.00967828	0.23426	0.071	0.023	1
AL033530.1	0.00971298	0.235507	0.095	0.036	1
RALB	0.00976524	0.175851	0.107	0.043	1
MIR1-1HG	0.00982236	-0.424292	0.655	0.76	1
GTF2IRD2	0.00982465	0.341347	0.179	0.09	1
AL591368.1	0.00985714	-0.455626	0	0.074	1
POMP	0.0098698	0.304842	0.143	0.066	1
PLOD3	0.00992994	0.290755	0.071	0.023	1
DDX50	0.0099381	0.342491	0.155	0.073	1
PPP1CB	0.00994885	0.433798	0.381	0.25	1
BCLAF1	0.00998669	0.238491	0.274	0.155	1
HLA-DRB5	0.00999005	0.165828	0.095	0.036	1
FYN	0.0100669	0.291954	0.345	0.212	1
PACSIN2	0.0100803	0.324093	0.405	0.263	1
GFM1	0.0100839	0.237198	0.131	0.058	1
WWP2	0.0100917	0.337307	0.19	0.1	1
BRD7	0.0100922	0.22057	0.155	0.073	1
THADA	0.0100976	0.292228	0.393	0.249	1
STAT1	0.0101202	0.196525	0.107	0.043	1
MAGI2-AS3	0.0101248	0.295126	0.19	0.097	1
MICALL1	0.0101441	0.208404	0.071	0.023	1
NEK9	0.010264	0.279312	0.19	0.098	1
CDC14B	0.0102779	0.42291	0.381	0.246	1
PDCD10	0.0103536	0.456	0.179	0.094	1
CORO7	0.0103815	0.135284	0.06	0.017	1
SMU1	0.01048	0.155772	0.143	0.065	1
MAP3K6	0.0104823	0.22417	0.06	0.017	1
LINC02666	0.0104823	0.200801	0.06	0.017	1
FABP4	0.0105131	0.223149	0.119	0.051	1
ATP6V0C	0.0105131	0.289886	0.119	0.051	1
ARSK	0.0105839	0.132092	0.06	0.017	1
KCNQ3	0.0105887	0.232605	0.107	0.043	1
EXOC6	0.0105934	0.39676	0.321	0.198	1
FAAP20	0.0105965	0.085403	0.083	0.029	1
ESYT2	0.0106151	0.698469	0.524	0.381	1
SSRP1	0.0106351	0.16944	0.06	0.017	1
KLHL4	0.0106351	0.158539	0.06	0.017	1
AC005562.1	0.0106765	0.177364	0.095	0.036	1
LRP1	0.0106769	-0.609864	0.06	0.16	1
SNAI3-AS1	0.0107191	0.0757235	0.083	0.029	1
CDYL	0.0107614	0.162785	0.357	0.212	1
GFOD2	0.0107658	0.142751	0.071	0.023	1
BRD9	0.01083	0.122885	0.107	0.043	1
NOL8	0.01083	0.10761	0.107	0.043	1
TCF7L2	0.0108604	0.50754	0.429	0.295	1
MECR	0.0108912	0.301689	0.131	0.059	1
NPIPB5	0.010922	0.220585	0.214	0.112	1
SPTAN1	0.010928	0.234624	0.488	0.323	1
SMAD1	0.0109319	0.444039	0.155	0.076	1
COMMD6	0.0109959	0.11916	0.071	0.023	1
OSBPL6	0.011011	-0.505575	0.036	0.129	1
PTPN23	0.0110522	0.152076	0.06	0.017	1
LDAH	0.0110756	0.151487	0.179	0.088	1
ENPEP	0.011093	0.435381	0.083	0.03	1
DDX59	0.0111348	0.190259	0.083	0.03	1
MOB4	0.0111455	0.20395	0.143	0.065	1
USP36	0.0111535	0.237309	0.19	0.097	1
VMP1	0.0111586	0.405403	0.417	0.278	1
SLC35B3	0.0111831	0.100661	0.071	0.023	1
RHBDD2	0.0111831	0.129147	0.071	0.023	1
USP12	0.0112358	0.395136	0.226	0.126	1
LINC01422	0.011261	0.226535	0.083	0.03	1
NHS	0.0112939	0.599445	0.179	0.094	1
ZNF37A	0.0113115	0.309289	0.179	0.092	1
MT2A	0.0113203	0.113032	0.06	0.017	1
MAP4K3	0.011361	0.432183	0.643	0.49	1
DIS3L2	0.0113698	0.277074	0.321	0.196	1
NNT	0.0113729	-0.627391	0.357	0.44	1
ZDHHC8	0.0113731	0.0834521	0.071	0.023	1
BOD1L1	0.0114104	0.302562	0.405	0.264	1
IPO11	0.0114823	0.187241	0.19	0.097	1
CYB5B	0.0114976	0.254497	0.119	0.052	1
SPEF2	0.0115176	0.061565	0.071	0.023	1
RNASE1	0.0115195	0.159054	0.155	0.073	1
CBFB	0.0115843	0.170663	0.214	0.112	1
LINC02254	0.0115931	-0.457569	0.048	0.148	1
CDKN1B	0.011594	0.0591964	0.06	0.017	1
NDRG4	0.0116051	-0.497495	0.345	0.467	1
DDHD2	0.0116061	0.272882	0.107	0.044	1
PDE9A	0.0117052	0.0767001	0.06	0.017	1
IARS	0.0117878	0.111086	0.167	0.08	1
TTC19	0.0118069	0.274923	0.262	0.151	1
INTS3	0.0118287	0.378133	0.167	0.086	1
NUP88	0.0118397	0.164197	0.119	0.051	1
XIAP	0.0118939	0.224843	0.262	0.149	1
PCSK5	0.0118983	1.18984	0.238	0.137	1
GAS2	0.0119179	-0.597511	0.298	0.393	1
GNL3L	0.0119402	0.236004	0.107	0.044	1
DDX17	0.0119898	0.354974	0.619	0.482	1
FANCL	0.0119963	0.244977	0.119	0.052	1
SPTBN1	0.0120182	0.298862	0.81	0.742	1
PHYKPL	0.0120353	0.18083	0.238	0.13	1
RETREG1	0.0120355	-0.564218	0.417	0.502	1
SGCE	0.0120451	0.166327	0.083	0.03	1
RSRC1	0.0120725	0.238286	0.262	0.151	1
THOC1	0.0120753	0.226559	0.226	0.122	1
ATF2	0.0120829	0.285634	0.262	0.152	1
GAN	0.0121031	0.0275537	0.214	0.11	1
MVB12B	0.0121086	0.246557	0.226	0.124	1
EPCAM-DT	0.0121116	-0.00430672	0.071	0.023	1
SSBP2	0.0121314	0.348993	0.548	0.39	1
ALOX12-AS1	0.0122673	0.189968	0.095	0.037	1
SLC35E2B	0.0122714	0.163359	0.083	0.03	1
LUZP1	0.0122733	0.0829566	0.369	0.219	1
DLGAP2	0.0122828	0.165399	0.107	0.044	1
ABCA9	0.0122948	-0.435296	0.036	0.13	1
KRBOX4	0.0122975	0.295942	0.119	0.052	1
BRWD3	0.0123611	0.358321	0.143	0.068	1
LINC01151	0.012444	-0.61899	0.512	0.583	1
FOPNL	0.012487	0.361324	0.071	0.024	1
SMARCA1	0.012569	0.271923	0.179	0.09	1
GOLPH3L	0.0125946	0.177361	0.107	0.044	1
FMR1	0.0125946	0.148154	0.107	0.044	1
SDHAF2	0.0126107	0.167367	0.143	0.066	1
COPB2	0.0126736	0.183172	0.107	0.044	1
NSFL1C	0.0127133	0.174137	0.107	0.044	1
AC098617.1	0.0127535	0.373628	0.607	0.455	1
OGA	0.0127697	0.272994	0.345	0.219	1
AL078459.1	0.0127824	0.140049	0.083	0.03	1
ARHGAP27	0.012809	0.265844	0.131	0.06	1
COL6A1	0.0128605	-0.771843	0.107	0.207	1
BMP5	0.0128732	0.501104	0.083	0.031	1
MEF2A	0.0128859	0.367176	0.762	0.607	1
ERP44	0.0128875	0.223788	0.274	0.16	1
CNTLN	0.0129012	0.10228	0.167	0.08	1
CCDC144A	0.0129129	0.421198	0.345	0.219	1
ATG12	0.0129575	0.314655	0.119	0.052	1
TMEM140	0.0129757	0.394533	0.095	0.038	1
FAM214A	0.0129917	0.211813	0.381	0.239	1
IL6ST	0.0129923	0.370776	0.298	0.187	1
PANK3	0.0129942	0.169644	0.107	0.044	1
PPP2R2B	0.0130069	0.525825	0.071	0.024	1
SAP30BP	0.0130197	0.25741	0.131	0.06	1
OGG1	0.0130208	0.105862	0.083	0.03	1
HAND2-AS1	0.0130232	-0.517732	0.56	0.594	1
PSMC6	0.0130423	0.179057	0.155	0.075	1
ST6GAL1	0.0130445	0.277208	0.583	0.415	1
TGFB1	0.0130599	0.298254	0.071	0.024	1
LRRC4C	0.0130759	-0.51332	0.012	0.09	1
PIBF1	0.0130874	0.354865	0.452	0.309	1
TRIP12	0.0131392	0.435681	0.357	0.233	1
EYA1	0.0131494	-0.780345	0.226	0.313	1
LINC01479	0.0131686	0.159951	0.095	0.037	1
SOX5	0.0131699	1.58907	0.25	0.159	1
MYL9	0.0132928	0.567781	0.429	0.294	1
TOM1	0.0133339	0.179186	0.155	0.075	1
EIF3M	0.0133916	0.250314	0.095	0.037	1
TSC22D2	0.0133923	0.297454	0.464	0.305	1
GTF2A1	0.0133985	0.290665	0.083	0.031	1
PPA1	0.0134105	0.0841997	0.083	0.03	1
RLF	0.0134466	0.333878	0.345	0.221	1
TSPAN14	0.0134501	0.265881	0.131	0.06	1
RELCH	0.0134807	0.264237	0.226	0.125	1
REXO1	0.0134911	0.250206	0.071	0.024	1
NDFIP2	0.0135251	0.339173	0.179	0.093	1
ZNF704	0.0135553	0.342322	0.56	0.416	1
ARRB1	0.0135701	0.391353	0.131	0.061	1
PPP2R5B	0.0136008	0.297704	0.071	0.024	1
AC005332.6	0.0136008	0.158203	0.071	0.024	1
MAP4K4	0.013607	0.261977	0.56	0.406	1
AL136962.1	0.0136175	0.474801	0.06	0.019	1
OTUD4	0.013646	0.540344	0.155	0.079	1
DDX60	0.0136832	0.30273	0.095	0.038	1
SLC25A29	0.0137279	0.175494	0.131	0.059	1
ATP1B3	0.0137283	1.12152	0.226	0.132	1
NBEAL1	0.0137797	0.520447	0.452	0.315	1
NCOR1	0.0137826	0.406811	0.571	0.44	1
PI4KA	0.0137971	0.238776	0.274	0.159	1
RAB3GAP1	0.0138505	0.274011	0.369	0.238	1
EHMT1	0.0139091	0.458312	0.476	0.337	1
CHRM2	0.0139203	-0.38916	0.702	0.831	1
IFITM2	0.0140173	0.273846	0.143	0.068	1
ARF1	0.0140487	0.355976	0.19	0.101	1
MIGA1	0.0140564	0.265464	0.226	0.126	1
SEC24B	0.0140734	0.402098	0.286	0.174	1
DCAF7	0.014114	0.290083	0.214	0.118	1
XRCC4	0.0141248	0.336563	0.143	0.068	1
TBC1D5	0.0141314	0.380511	0.714	0.571	1
MBNL1	0.0141817	0.291942	0.821	0.659	1
VEZF1	0.0142975	0.297426	0.179	0.094	1
PAK2	0.014307	0.303129	0.25	0.141	1
DENND11	0.0143336	0.350864	0.107	0.045	1
ACYP2	0.0143558	-0.431419	0.536	0.614	1
NUP35	0.0143835	0.180877	0.06	0.019	1
HNRNPLL	0.0143846	0.127749	0.155	0.074	1
LBR	0.0145074	0.121434	0.071	0.024	1
RAI2	0.0146109	0.192538	0.083	0.031	1
LMO7	0.0146577	-0.347014	0.595	0.696	1
PTBP3	0.0146649	0.33161	0.19	0.101	1
RPL32	0.0146842	0.1125	0.226	0.122	1
NBN	0.0147045	0.142005	0.119	0.052	1
PMM2	0.01471	0.280756	0.119	0.053	1
BCR	0.0147724	0.249389	0.155	0.075	1
AC012447.1	0.0147978	0.0548661	0.107	0.044	1
LRRC37A2	0.0148015	0.109429	0.071	0.024	1
CPQ	0.0148276	0.35172	0.417	0.286	1
PDE8A	0.014909	0.434612	0.393	0.272	1
PTH1R	0.0149151	0.231586	0.06	0.019	1
TRIB2	0.0149582	0.125872	0.119	0.052	1
HTT	0.0149847	0.0889441	0.25	0.136	1
RBL2	0.0150502	0.099005	0.131	0.059	1
ECE1	0.0150737	0.201377	0.167	0.085	1
MIR100HG	0.0150861	-0.694336	0.095	0.189	1
APC	0.0150991	0.26416	0.298	0.181	1
MSANTD4	0.0151008	0.0419363	0.071	0.024	1
MRC2	0.015105	-0.446526	0.012	0.087	1
STX8	0.0151133	0.287074	0.429	0.284	1
WDR43	0.0151294	0.126698	0.119	0.052	1
AP1AR	0.0152011	0.203838	0.095	0.038	1
NRSN2-AS1	0.015226	-0.730612	0.405	0.468	1
TMEM87A	0.0152405	0.122491	0.202	0.107	1
AGO4	0.0152473	0.0421002	0.226	0.121	1
NR2F6	0.0152517	-0.369559	0	0.066	1
ARL8A	0.0153251	0.163773	0.06	0.019	1
HMGB2	0.0153251	0.14762	0.06	0.019	1
DES	0.0153668	-0.353187	0.69	0.791	1
ELK4	0.0153714	0.160542	0.107	0.045	1
SLF1	0.0153895	0.092635	0.119	0.052	1
PCNX4	0.0154293	0.35698	0.381	0.255	1
VAPA	0.0154565	0.278739	0.369	0.238	1
PLN	0.0154631	-0.528395	0.31	0.416	1
TRIM25	0.015472	0.158711	0.083	0.031	1
STK11	0.015477	0.115823	0.119	0.052	1
TENT2	0.0155126	0.210899	0.44	0.289	1
PRORP	0.0155321	0.322137	0.167	0.086	1
LUC7L2	0.0155404	0.150923	0.369	0.228	1
APPBP2	0.0155688	0.23929	0.25	0.144	1
EIF2S1	0.0156103	0.327195	0.107	0.046	1
DHRSX	0.0156756	-0.508623	0.452	0.524	1
STX18	0.0157033	0.306194	0.25	0.147	1
HIVEP3	0.0157144	-0.555098	0.417	0.503	1
LMOD2	0.0157509	-0.380401	0.643	0.729	1
HPRT1	0.015778	0.103239	0.143	0.067	1
PATL1	0.0158062	0.178349	0.083	0.031	1
DDOST	0.0158159	0.129425	0.06	0.019	1
GNPDA2	0.0158159	0.072179	0.06	0.019	1
KLHL9	0.0158409	0.0711298	0.071	0.024	1
AL049828.1	0.015848	0.296462	0.274	0.165	1
RPL38	0.0158653	0.1918	0.202	0.108	1
COL6A2	0.0158906	-0.599699	0.107	0.207	1
MTFMT	0.0159105	0.210288	0.095	0.038	1
SRFBP1	0.0159614	0.245373	0.119	0.053	1
MAF	0.0160305	0.0821113	0.06	0.019	1
NRAD1	0.0160325	0.144221	0.083	0.031	1
PDE4DIP	0.016039	-0.32813	0.69	0.742	1
BCL7A	0.0160847	0.252212	0.131	0.061	1
NDUFA4	0.0160851	-0.580071	0.071	0.166	1
STXBP1	0.0162107	0.141664	0.298	0.169	1
SRP9	0.0162233	0.145198	0.095	0.038	1
ROBO2	0.0162317	-0.411257	0	0.065	1
DIS3	0.0162617	0.137149	0.083	0.031	1
GCC2	0.0162951	0.464928	0.202	0.112	1
MAP4K5	0.0163089	0.36368	0.179	0.096	1
INPP4A	0.0164052	0.191551	0.286	0.17	1
LINC02237	0.0164056	0.443027	0.095	0.039	1
COX10	0.016417	-0.48901	0.179	0.285	1
ADAM10	0.01644	0.244985	0.5	0.334	1
ERH	0.0164672	0.0484114	0.06	0.019	1
SP4	0.0164691	0.0816717	0.143	0.067	1
NCKAP5	0.0164929	-0.360986	0.536	0.622	1
SELENOP	0.0165106	-0.450442	0.024	0.105	1
H19	0.0165182	0.464928	0.286	0.175	1
RC3H1	0.0165189	0.191748	0.369	0.227	1
CCDC85C	0.0166113	0.161758	0.131	0.06	1
ANKRD36	0.0166117	0.298814	0.214	0.121	1
PSMB3	0.0166151	0.0564185	0.06	0.019	1
TMTC3	0.0166168	0.295694	0.095	0.039	1
EMC3	0.0167197	0.221227	0.155	0.076	1
MGAT5	0.0167384	-0.363524	0.643	0.722	1
RORA-AS1	0.0167879	0.115292	0.083	0.031	1
IL10RB	0.0167879	0.0972575	0.083	0.031	1
GABPB2	0.0168005	0.189891	0.369	0.233	1
HDAC1	0.0168456	0.0643809	0.143	0.067	1
NFAT5	0.0168503	0.349678	0.524	0.386	1
OCIAD1	0.016975	0.184964	0.274	0.161	1
LSM14A	0.0169774	0.291949	0.357	0.228	1
ZNF451	0.0169874	0.251247	0.238	0.136	1
CC2D1A	0.0169894	0.296542	0.083	0.032	1
LINC02245	0.0171007	0.304576	0.095	0.039	1
CCDC50	0.0171224	0.202685	0.238	0.133	1
MRPL1	0.0171503	0.282093	0.167	0.087	1
ZCCHC14	0.017173	0.293787	0.25	0.145	1
GSTA4	0.0172075	0.0987394	0.083	0.031	1
MEIS2	0.0172476	-0.357317	0.69	0.725	1
CD47	0.0172531	0.262769	0.155	0.078	1
SV2B	0.0172952	0.0713384	0.06	0.019	1
ENTPD1-AS1	0.017301	0.3323	0.369	0.233	1
RUSC2	0.0173237	0.122005	0.226	0.124	1
KLF13	0.0173753	0.314118	0.155	0.078	1
ZNF263	0.0174319	0.258847	0.071	0.025	1
SLC12A6	0.017484	0.229848	0.214	0.119	1
ATP10A	0.0174993	0.289105	0.071	0.025	1
ATF7	0.0175574	0.232839	0.31	0.188	1
CCDC14	0.0176218	0.246021	0.155	0.078	1
OTUD6B-AS1	0.0176348	0.236088	0.071	0.025	1
SRP14	0.0176575	0.194936	0.107	0.046	1
ANKIB1	0.0178017	0.332742	0.333	0.218	1
PPARGC1A	0.0178058	-0.494371	0.583	0.618	1
FNBP1	0.0178525	0.157564	0.286	0.168	1
EFR3A	0.0178828	0.285996	0.274	0.169	1
DPY19L4	0.0179719	0.159785	0.238	0.133	1
SCYL2	0.0179911	0.197936	0.167	0.086	1
ANKRD50	0.0179915	0.193875	0.095	0.039	1
TAF15	0.0180023	0.277487	0.31	0.195	1
PCNP	0.0180096	0.159524	0.202	0.11	1
CAMK1D	0.0180154	0.198235	0.143	0.068	1
CFAP298	0.0180469	0.157319	0.071	0.025	1
ME1	0.0180499	-0.517486	0.048	0.133	1
CIR1	0.0180899	0.159784	0.131	0.061	1
MTG1	0.0181057	0.170558	0.095	0.039	1
RASSF8	0.0181233	0.430072	0.214	0.123	1
MRPL33	0.0181657	0.237034	0.179	0.093	1
HP1BP3	0.0181747	0.316688	0.345	0.228	1
FERMT2	0.0181768	0.228022	0.333	0.214	1
SEM1	0.0182192	0.251101	0.286	0.169	1
SLC24A3	0.0182205	0.270381	0.095	0.039	1
GRID2	0.018228	-0.548732	0.012	0.083	1
DNAJC9	0.0182389	0.108479	0.119	0.053	1
DGKB	0.0182515	0.295705	0.155	0.078	1
TBC1D1	0.0182661	0.347176	0.583	0.454	1
BAZ1B	0.0183385	0.186098	0.369	0.239	1
NSD3	0.0183941	0.266119	0.31	0.194	1
MALT1	0.0184113	0.204126	0.298	0.183	1
ID3	0.0184445	0.195441	0.131	0.061	1
RAB8B	0.0185441	0.0819579	0.131	0.06	1
UBA1	0.0185864	-0.393908	0.012	0.083	1
RPS10	0.0186096	0.183133	0.071	0.025	1
LRRC29	0.0186096	0.169813	0.071	0.025	1
AC084198.2	0.0186359	0.257711	0.238	0.137	1
ARPC4	0.018681	0.111925	0.071	0.025	1
MYADM	0.0187085	0.161954	0.131	0.061	1
FANCC	0.0188041	0.217687	0.274	0.166	1
PPM1L	0.0188141	-0.543118	0.512	0.585	1
HLA-DRB1	0.0188634	0.314792	0.095	0.039	1
LY6E	0.0188966	0.154637	0.071	0.025	1
ANKRD52	0.0189099	0.216734	0.083	0.032	1
PIGG	0.0189228	0.188047	0.095	0.039	1
PRPF40A	0.0189573	0.0823524	0.25	0.14	1
SIKE1	0.0189689	0.127168	0.071	0.025	1
YWHAH	0.01904	0.108957	0.083	0.032	1
GOLPH3	0.0190581	0.216912	0.274	0.162	1
MAP3K11	0.019102	0.215786	0.095	0.039	1
MAPRE1	0.0191181	0.240982	0.119	0.054	1
BCL2L1	0.0191861	0.304396	0.202	0.114	1
SLU7	0.0192298	0.0331034	0.095	0.038	1
ARHGEF17	0.0193174	0.259386	0.19	0.103	1
GPI	0.0194002	-0.56287	0.393	0.468	1
RPGR	0.0195918	0.172819	0.107	0.046	1
RNF152	0.0195967	0.340142	0.19	0.103	1
RBM3	0.0196579	0.1565	0.143	0.07	1
SGCG	0.0197351	-0.459769	0.5	0.556	1
NAA60	0.019781	0.110679	0.071	0.025	1
MTMR1	0.0198177	0.23579	0.143	0.071	1
DFFA	0.0198377	0.155113	0.083	0.032	1
SH3PXD2B	0.0198377	0.167108	0.083	0.032	1
NMRAL1	0.0198563	0.11457	0.071	0.025	1
RUFY2	0.0198849	0.289247	0.179	0.097	1
SLBP	0.0199319	0.0468037	0.071	0.025	1
C3	0.0200432	-0.422463	0.012	0.082	1
CFL1	0.0200432	0.174327	0.143	0.07	1
GJC1	0.0200526	0.138309	0.131	0.061	1
SH3BP2	0.0200837	0.0397448	0.071	0.025	1
EDEM3	0.0201332	0.155403	0.167	0.085	1
DDB2	0.02016	0.0724489	0.071	0.025	1
GUCY1A1	0.0202591	0.591452	0.214	0.127	1
UBA52	0.0202954	0.233596	0.179	0.095	1
HBB	0.020299	0.0847392	0.405	0.258	1
DCAF10	0.0203088	0.305479	0.262	0.159	1
CTDP1	0.0203585	0.181503	0.06	0.02	1
PML	0.0203987	0.186351	0.095	0.039	1
GPX3	0.0204121	-0.556703	0.06	0.148	1
[truncated: 5,569 more rows]

## Sheet: Supplementary Table7B1
gene	p_val	avg_log2FC	pct.1	pct.2	p_val_adj
ADAMTSL3	2.73403e-47	2.93279	0.878	0.137	1.00068e-42
MEG8	3.15498e-46	2.26083	0.735	0.079	1.15475e-41
BICC1	4.87535e-46	2.61083	0.857	0.126	1.78443e-41
TFPI	2.33459e-42	1.9595	0.714	0.082	8.54482e-38
BNC2	4.05515e-42	2.25768	0.714	0.086	1.48423e-37
UNC5C	4.68811e-41	1.89903	0.735	0.089	1.7159e-36
ABCA10	1.99885e-37	2.38517	0.796	0.141	7.31597e-33
GLIS3	1.3561e-36	2.1805	0.694	0.093	4.96348e-32
NEGR1	1.40513e-34	3.17616	0.959	0.349	5.14292e-30
NOVA1	3.10109e-32	1.42947	0.449	0.038	1.13503e-27
ABCA6	4.35569e-32	2.33406	0.673	0.112	1.59423e-27
MEG3	5.42777e-32	1.97039	0.735	0.124	1.98662e-27
FBN1	8.52677e-32	2.62659	0.796	0.158	3.12088e-27
PID1	1.3047e-31	1.95658	0.714	0.117	4.77532e-27
EBF2	1.39561e-31	1.93716	0.673	0.102	5.10806e-27
MAPK10	1.63209e-31	2.03986	0.612	0.083	5.9736e-27
EGFR	1.65448e-31	2.34712	0.714	0.13	6.05556e-27
ROBO1	2.36073e-31	2.3312	0.694	0.114	8.6405e-27
AL445250.1	4.47062e-31	1.79092	0.469	0.045	1.63629e-26
PTPN13	8.9127e-31	1.27188	0.388	0.028	3.26214e-26
CDH19	6.3654e-30	2.61726	0.755	0.151	2.3298e-25
TMEM108	6.48075e-30	1.78863	0.531	0.066	2.37202e-25
TTLL7	6.59332e-30	1.18404	0.388	0.029	2.41322e-25
LPCAT2	1.12258e-29	1.34032	0.469	0.046	4.10874e-25
TNXB	3.2319e-29	2.24989	0.776	0.166	1.18291e-24
ADGRB3	2.46829e-28	2.4721	0.816	0.213	9.03417e-24
RTN4	2.6182e-28	2.02709	0.735	0.146	9.58286e-24
COL8A1	3.33027e-28	1.97429	0.571	0.08	1.21891e-23
COLEC12	3.67206e-28	1.62542	0.51	0.06	1.34401e-23
SLIT2	4.42168e-28	2.44216	0.735	0.152	1.61838e-23
SULF1	6.00266e-28	1.53158	0.388	0.032	2.19703e-23
MSC-AS1	6.23831e-28	1.69418	0.49	0.057	2.28328e-23
SPRY1	2.60967e-27	1.54839	0.49	0.057	9.55166e-23
DENND2A	2.76338e-27	1.31084	0.551	0.073	1.01143e-22
SMOC2	2.76604e-27	1.77678	0.571	0.082	1.0124e-22
FREM1	3.78979e-27	1.68456	0.469	0.053	1.3871e-22
COL12A1	1.13956e-26	1.55687	0.531	0.072	4.17089e-22
C8orf34	1.30826e-26	1.42259	0.388	0.035	4.78837e-22
COL5A2	3.44551e-26	1.66256	0.571	0.083	1.26109e-21
TRPS1	3.59327e-26	1.86513	0.755	0.165	1.31517e-21
DCLK1	3.92129e-26	2.15622	0.653	0.123	1.43523e-21
PTGIS	2.46904e-25	1.40403	0.367	0.032	9.03694e-21
EPB41L2	3.17947e-25	1.62753	0.735	0.151	1.16372e-20
AC011246.1	8.29413e-25	2.44442	0.694	0.161	3.03574e-20
ABCA9	8.60464e-25	2.16728	0.633	0.13	3.14938e-20
HMCN2	2.19488e-24	1.01854	0.367	0.034	8.03348e-20
GRK5	4.40348e-24	1.9751	0.714	0.158	1.61172e-19
COL15A1	5.7883e-24	2.19342	0.816	0.235	2.11857e-19
ANXA2	1.04852e-23	1.35119	0.49	0.065	3.8377e-19
RNF24	1.12602e-23	1.48372	0.51	0.075	4.12134e-19
HAS2	2.39284e-23	1.00125	0.224	0.01	8.75804e-19
ABI3BP	2.45056e-23	1.89142	0.653	0.139	8.96928e-19
ABCA9-AS1	2.67218e-23	0.988563	0.224	0.01	9.78043e-19
GAS7	3.06574e-23	2.1699	0.673	0.151	1.12209e-18
AL035446.2	5.27358e-23	1.6837	0.367	0.038	1.93018e-18
ABCA8	7.07147e-23	1.6992	0.816	0.241	2.58823e-18
FOXP2	1.38355e-22	1.63732	0.735	0.176	5.06395e-18
KIAA1755	1.40641e-22	0.954408	0.286	0.021	5.14761e-18
MRC2	1.58008e-22	1.56767	0.531	0.087	5.78324e-18
ESR1	3.85507e-22	1.17616	0.347	0.034	1.41099e-17
SVEP1	5.18314e-22	1.16518	0.408	0.049	1.89708e-17
GFRA1	5.4573e-22	1.02413	0.306	0.025	1.99743e-17
RUFY3	7.8974e-22	1.34163	0.714	0.162	2.89053e-17
TBX18	8.7552e-22	0.960649	0.327	0.03	3.20449e-17
NRK	1.04145e-21	1.0155	0.367	0.039	3.81182e-17
AC004160.1	1.29281e-21	0.982782	0.265	0.019	4.73181e-17
COL4A3	1.31976e-21	1.43506	0.429	0.057	4.83045e-17
SOX5	1.39563e-21	2.10069	0.673	0.159	5.10813e-17
COL4A4	1.66341e-21	1.18869	0.429	0.056	6.08824e-17
MMP16	2.10804e-21	1.36416	0.408	0.051	7.71563e-17
LPAR1	3.15078e-21	1.30141	0.429	0.057	1.15322e-16
VIT	3.23123e-21	1.39134	0.388	0.046	1.18266e-16
AKT3	4.13045e-21	1.99419	0.714	0.184	1.51179e-16
ITIH5	4.2389e-21	1.29427	0.408	0.051	1.55148e-16
LAMB1	4.49117e-21	1.56631	0.592	0.123	1.64381e-16
PON3	4.78315e-21	0.600826	0.184	0.007	1.75068e-16
AC037198.1	8.15006e-21	0.995321	0.224	0.013	2.983e-16
LHFPL2	1.59556e-20	1.20703	0.347	0.038	5.8399e-16
TCF4	1.91397e-20	1.88637	0.898	0.399	7.00533e-16
GNG2	2.12987e-20	1.04583	0.347	0.037	7.79552e-16
TTN	2.7674e-20	-0.984819	1	1	1.0129e-15
AL365295.1	3.01923e-20	1.4291	0.408	0.056	1.10507e-15
COL6A3	4.0299e-20	1.58082	0.551	0.104	1.47498e-15
EDIL3	4.19006e-20	1.11357	0.367	0.043	1.5336e-15
COL3A1	4.3909e-20	1.96659	0.673	0.167	1.60711e-15
AC093110.1	8.34152e-20	0.441267	0.143	0.003	3.05308e-15
SCN7A	8.35092e-20	2.07196	0.776	0.251	3.05652e-15
CARMIL1	9.24361e-20	1.31958	0.449	0.07	3.38325e-15
COL24A1	1.64527e-19	1.3661	0.327	0.035	6.02186e-15
TRERF1	1.65344e-19	0.948287	0.367	0.044	6.05175e-15
PDE5A	1.8006e-19	1.38787	0.469	0.078	6.59039e-15
BOC	2.68674e-19	0.987938	0.265	0.022	9.83373e-15
PLCB1	3.17399e-19	1.90777	0.816	0.254	1.16171e-14
AC025259.3	3.70549e-19	0.730365	0.204	0.012	1.35625e-14
COL6A2	3.95987e-19	1.72356	0.714	0.207	1.44935e-14
RORA	7.10928e-19	1.95312	0.939	0.556	2.60207e-14
SPOCK1	7.13879e-19	1.33558	0.429	0.065	2.61287e-14
VCAN	7.61945e-19	1.37763	0.408	0.06	2.78879e-14
PLAC9	7.69134e-19	1.54154	0.347	0.042	2.81511e-14
FMO2	1.6999e-18	1.637	0.51	0.101	6.2218e-14
NCAM2	1.72125e-18	1.54492	0.51	0.096	6.29995e-14
TMTC2	1.75504e-18	1.70053	0.531	0.108	6.42361e-14
ARHGAP6	2.02997e-18	1.40618	0.449	0.074	7.42989e-14
ITGBL1	2.61783e-18	1.25841	0.347	0.043	9.58153e-14
ACSM3	2.97944e-18	2.43646	0.531	0.117	1.0905e-13
COL5A1	4.00718e-18	0.928178	0.367	0.049	1.46667e-13
GFPT2	4.68453e-18	1.00192	0.224	0.016	1.71458e-13
PODN	5.5678e-18	0.823618	0.224	0.016	2.03787e-13
EGR3	5.92419e-18	1.16862	0.51	0.095	2.16831e-13
HAPLN1	8.31341e-18	0.726965	0.143	0.005	3.04279e-13
PDGFD	1.04061e-17	1.893	0.653	0.176	3.80874e-13
TPM4	2.14772e-17	1.09758	0.49	0.089	7.86088e-13
CCDC80	2.30014e-17	1.51548	0.51	0.104	8.41874e-13
ADAMTS2	3.26633e-17	0.656856	0.184	0.01	1.19551e-12
HEYL	3.59877e-17	1.20685	0.306	0.036	1.31718e-12
GULP1	4.74129e-17	0.975796	0.306	0.036	1.73536e-12
ADGRL3	5.49429e-17	2.02204	0.612	0.175	2.01096e-12
RHOJ	9.51335e-17	1.08572	0.429	0.072	3.48198e-12
S100A4	1.14827e-16	0.637764	0.245	0.022	4.20277e-12
PLCG2	1.71976e-16	1.03596	0.98	0.822	6.29451e-12
TSHZ2	2.34169e-16	1.43524	0.531	0.116	8.57082e-12
AL355835.1	2.791e-16	0.738806	0.204	0.015	1.02153e-11
EBF1	2.79666e-16	2.22355	0.755	0.282	1.02361e-11
FAIM2	3.34054e-16	0.51065	0.143	0.006	1.22267e-11
ADGRG2	3.41958e-16	0.538245	0.143	0.006	1.2516e-11
PCED1B	4.72816e-16	1.15748	0.286	0.034	1.73055e-11
TNNT2	6.28219e-16	-1.2923	0.776	0.964	2.29934e-11
PLSCR4	6.33173e-16	0.849781	0.306	0.038	2.31748e-11
EPHA3	6.40944e-16	1.69229	0.408	0.074	2.34592e-11
LTBP4	6.92513e-16	1.35474	0.592	0.149	2.53467e-11
AXL	8.73391e-16	0.863987	0.265	0.029	3.1967e-11
RBMS3	9.87625e-16	1.59258	0.918	0.693	3.61481e-11
VAT1	1.10384e-15	0.813844	0.184	0.013	4.04018e-11
SDC2	1.30797e-15	1.50644	0.51	0.116	4.78729e-11
COL6A6	1.53354e-15	0.81185	0.265	0.029	5.61291e-11
MCUB	1.68028e-15	0.705466	0.204	0.016	6.14999e-11
EFCC1	1.86737e-15	0.777116	0.204	0.016	6.83477e-11
ANTXR1	2.22903e-15	1.62609	0.469	0.1	8.15848e-11
CLMP	2.98342e-15	0.978172	0.265	0.03	1.09196e-10
PELI2	3.12437e-15	0.91741	0.327	0.046	1.14355e-10
IGSF10	5.66103e-15	0.874965	0.204	0.017	2.07199e-10
SNTB1	5.90668e-15	1.20501	0.347	0.056	2.1619e-10
ELN	5.99156e-15	0.748983	0.265	0.03	2.19297e-10
SREBF1	8.1492e-15	0.760638	0.265	0.031	2.98269e-10
MAML2	8.2185e-15	1.80425	0.714	0.264	3.00805e-10
AC025159.1	9.10054e-15	0.971272	0.286	0.037	3.33089e-10
CALCRL	9.37618e-15	1.41655	0.469	0.101	3.43177e-10
SCARA5	1.05384e-14	1.13746	0.347	0.054	3.85716e-10
C3	1.1619e-14	1.1451	0.429	0.082	4.25268e-10
FAM107B	1.23333e-14	0.834478	0.327	0.049	4.51411e-10
GPR153	1.48968e-14	0.335424	0.122	0.005	5.45238e-10
IL7	1.64066e-14	0.428291	0.122	0.005	6.00498e-10
SYTL4	1.64443e-14	0.564619	0.163	0.01	6.01876e-10
SUSD1	1.67607e-14	0.786186	0.286	0.037	6.13458e-10
SLC9A9	2.41556e-14	1.31515	0.469	0.104	8.84119e-10
MYH7	3.46495e-14	-1.14579	0.898	0.984	1.2682e-09
LRFN5	3.83757e-14	0.880817	0.245	0.028	1.40459e-09
SESTD1	3.96166e-14	1.26204	0.531	0.134	1.45001e-09
MAMDC2	4.16621e-14	0.76126	0.327	0.049	1.52488e-09
PTN	4.20862e-14	0.763401	0.327	0.049	1.5404e-09
COL1A2	4.63286e-14	1.51306	0.551	0.154	1.69567e-09
NOX4	4.73547e-14	1.1117	0.184	0.015	1.73323e-09
LINC00632	4.82246e-14	0.794449	0.245	0.028	1.76507e-09
TIAM1	4.97991e-14	0.866192	0.367	0.063	1.8227e-09
MAN2A1	5.08357e-14	1.25096	0.449	0.1	1.86064e-09
LSP1	5.65501e-14	0.643351	0.265	0.032	2.06979e-09
CCBE1	6.84332e-14	1.09283	0.388	0.072	2.50472e-09
NEXN	8.17413e-14	-1.13797	0.837	0.969	2.99182e-09
SGIP1	8.89683e-14	1.28053	0.429	0.089	3.25633e-09
CMTM3	9.09725e-14	0.582393	0.143	0.008	3.32968e-09
FANCL	1.08997e-13	0.789209	0.327	0.052	3.98939e-09
BMP4	1.10913e-13	0.565868	0.143	0.008	4.05952e-09
AC105285.1	1.12153e-13	0.497726	0.184	0.015	4.10492e-09
LINC02511	1.2685e-13	1.0653	0.224	0.024	4.64283e-09
STAT6	1.29179e-13	0.564542	0.204	0.02	4.72809e-09
RERG	1.76139e-13	1.14447	0.327	0.054	6.44687e-09
CDC42EP2	1.81937e-13	0.695244	0.204	0.02	6.65909e-09
LRRK2	1.83266e-13	0.871468	0.388	0.073	6.70771e-09
LAMC1	2.05572e-13	1.62227	0.735	0.291	7.52415e-09
DCN	2.45427e-13	1.48004	0.857	0.491	8.98289e-09
AL591501.1	3.46606e-13	1.18404	0.286	0.043	1.26861e-08
OSR1	3.48846e-13	0.173501	0.061	0	1.27681e-08
FSCN3	3.48846e-13	0.183677	0.061	0	1.27681e-08
PRRT2	3.48846e-13	0.264416	0.061	0	1.27681e-08
AC004542.2	3.48846e-13	0.224458	0.061	0	1.27681e-08
SPECC1	3.62632e-13	0.806754	0.306	0.048	1.32727e-08
MT-ND1	3.64191e-13	-1.08246	1	1	1.33297e-08
PLA2G5	3.83703e-13	1.53838	0.612	0.202	1.40439e-08
RYR2	4.03726e-13	-0.895522	1	1	1.47768e-08
TMEM132C	4.7496e-13	0.86103	0.224	0.025	1.7384e-08
CABLES1	4.91861e-13	0.485475	0.184	0.016	1.80026e-08
STON2	4.96592e-13	0.718739	0.245	0.03	1.81757e-08
BGN	5.55264e-13	0.867912	0.327	0.054	2.03232e-08
INHBA	6.62724e-13	0.621728	0.143	0.009	2.42564e-08
AEBP1	7.38217e-13	0.71879	0.204	0.021	2.70195e-08
VASH2	7.72063e-13	0.200922	0.102	0.003	2.82583e-08
AC107208.1	7.97254e-13	0.53835	0.224	0.025	2.91803e-08
CACNA1C	8.51727e-13	-0.901068	0.939	0.995	3.1174e-08
CORO2B	8.57716e-13	0.529225	0.265	0.036	3.13933e-08
ADRA1B	9.49917e-13	0.838463	0.224	0.027	3.47679e-08
IER5L	1.11059e-12	0.472547	0.143	0.009	4.06486e-08
EFEMP1	1.34509e-12	0.957681	0.306	0.051	4.92316e-08
PLXDC1	1.54868e-12	0.842563	0.367	0.07	5.66831e-08
SRGAP1	1.62317e-12	0.878077	0.551	0.148	5.94096e-08
ST8SIA1	2.00969e-12	0.805032	0.245	0.032	7.35568e-08
THBS2	2.46733e-12	0.758999	0.265	0.038	9.03066e-08
APCDD1	2.83905e-12	1.02855	0.327	0.06	1.03912e-07
FER	2.92999e-12	1.26021	0.776	0.32	1.07241e-07
HMCN1	3.22583e-12	1.39423	0.429	0.102	1.18069e-07
JAM3	3.84179e-12	0.898536	0.306	0.053	1.40613e-07
BMP2	5.3896e-12	0.395166	0.122	0.007	1.97265e-07
TCF7L1	5.51269e-12	0.876563	0.388	0.081	2.0177e-07
PRKG1	6.35369e-12	0.854362	1	0.924	2.32551e-07
SLC66A1L	6.78929e-12	0.519099	0.143	0.01	2.48495e-07
CRY1	7.38243e-12	1.07618	0.449	0.111	2.70204e-07
SDC3	7.39723e-12	0.542629	0.143	0.01	2.70746e-07
BZW1	7.40139e-12	0.570353	0.265	0.039	2.70898e-07
ASAP2	7.4627e-12	1.00003	0.429	0.098	2.73142e-07
TENM1	8.39337e-12	0.623566	0.184	0.019	3.07206e-07
GSN	8.90931e-12	1.83164	0.878	0.518	3.2609e-07
WSB1	9.26803e-12	1.16923	0.694	0.26	3.39219e-07
SPON1	1.03659e-11	0.520167	0.204	0.023	3.79404e-07
MYBPC3	1.39186e-11	-0.913955	0.837	0.98	5.09435e-07
PTPRT	1.54568e-11	1.00326	0.367	0.075	5.65734e-07
PDE1A	1.672e-11	1.30365	0.51	0.146	6.11968e-07
CHD9	1.74117e-11	1.29475	0.816	0.425	6.37284e-07
IER2	1.82513e-11	1.06547	0.469	0.124	6.68015e-07
RAP1B	1.93102e-11	1.00516	0.551	0.171	7.06771e-07
DENND6A-AS1	2.1123e-11	0.296251	0.102	0.005	7.73124e-07
PTEN	2.24273e-11	0.958687	0.633	0.213	8.20862e-07
AC090630.1	2.24438e-11	0.691786	0.184	0.02	8.21465e-07
NAALADL2	2.31849e-11	1.26212	0.796	0.388	8.4859e-07
CEP126	2.33509e-11	0.694384	0.184	0.02	8.54668e-07
ASTE1	2.34276e-11	0.351041	0.082	0.002	8.57472e-07
ACSM1	2.47355e-11	0.307844	0.082	0.002	9.05346e-07
FSIP1	2.54161e-11	0.303157	0.082	0.002	9.30254e-07
FRMD6	2.54354e-11	0.830872	0.224	0.03	9.30962e-07
FTL	2.57012e-11	0.880107	0.51	0.139	9.4069e-07
CATSPERB	2.57058e-11	0.579628	0.163	0.015	9.40859e-07
BTBD19	2.61149e-11	0.288181	0.082	0.002	9.55832e-07
SKIL	2.6883e-11	1.09434	0.449	0.121	9.83944e-07
CCDC152	2.75695e-11	0.232259	0.082	0.002	1.00907e-06
DLK1	2.99955e-11	1.08651	0.429	0.109	1.09787e-06
TLL2	3.01789e-11	1.19267	0.51	0.145	1.10458e-06
AC007376.2	3.70056e-11	0.680163	0.143	0.012	1.35444e-06
ALDH1A2	3.99476e-11	0.737887	0.367	0.076	1.46212e-06
KAZN	4.03542e-11	1.95646	0.429	0.118	1.47701e-06
PRELP	4.08126e-11	0.809184	0.347	0.071	1.49378e-06
RRBP1	4.19086e-11	0.881513	0.347	0.072	1.5339e-06
ARSJ	4.55926e-11	0.471801	0.143	0.012	1.66873e-06
ECM2	5.46496e-11	0.608711	0.204	0.025	2.00023e-06
ANKDD1A	5.99362e-11	0.423123	0.122	0.008	2.19372e-06
ARAP2	6.10903e-11	0.747689	0.224	0.031	2.23597e-06
SH3BP5	6.84145e-11	0.668327	0.184	0.021	2.50404e-06
CDH13	6.97012e-11	-0.987723	0.796	0.977	2.55113e-06
NEBL	7.60179e-11	-1.02591	0.735	0.95	2.78233e-06
MALRD1	8.07344e-11	0.660365	0.286	0.05	2.95496e-06
PAMR1	8.69737e-11	0.780529	0.184	0.021	3.18332e-06
ASPN	9.37623e-11	0.565124	0.245	0.037	3.43179e-06
FNDC3B	1.12044e-10	1.29151	0.918	0.64	4.10091e-06
ADAMTS19	1.12517e-10	0.866104	0.224	0.032	4.11824e-06
SERPING1	1.25939e-10	1.09664	0.367	0.085	4.6095e-06
RFTN2	1.37239e-10	0.577187	0.204	0.027	5.02307e-06
THBS1	1.38698e-10	1.64053	0.592	0.221	5.0765e-06
UGDH	1.47234e-10	0.851417	0.184	0.022	5.38889e-06
TRDN	1.56869e-10	-1.24299	0.612	0.87	5.74155e-06
SPATA6	1.75473e-10	1.22914	0.408	0.108	6.4225e-06
FN1	1.77763e-10	1.30089	0.449	0.129	6.50629e-06
PLEKHH2	1.834e-10	0.849006	0.184	0.022	6.71262e-06
RPS28	2.31754e-10	0.948431	0.49	0.146	8.48244e-06
EPHA6	2.75438e-10	1.09933	0.388	0.096	1.00813e-05
PCSK6	3.15899e-10	1.14657	0.592	0.207	1.15622e-05
UST	3.25654e-10	1.19721	0.531	0.173	1.19192e-05
RBM20	3.63821e-10	-0.922348	0.837	0.954	1.33162e-05
CACHD1	3.88433e-10	0.708823	0.265	0.048	1.4217e-05
DHRS4L2	3.89243e-10	0.443645	0.122	0.009	1.42467e-05
CYTH3	5.00603e-10	0.930726	0.551	0.181	1.83226e-05
DSEL	5.08711e-10	0.263179	0.122	0.009	1.86193e-05
LASP1	5.30255e-10	0.70514	0.224	0.035	1.94079e-05
DYNC1I2	5.60697e-10	0.712595	0.408	0.103	2.05221e-05
MELTF	5.98039e-10	0.421658	0.061	0.001	2.18888e-05
AC090578.1	6.20895e-10	0.67741	0.224	0.035	2.27254e-05
AL357873.1	6.36142e-10	0.3509	0.061	0.001	2.32834e-05
AC007336.1	6.36142e-10	0.211977	0.061	0.001	2.32834e-05
EBF3	6.38605e-10	0.80373	0.265	0.049	2.33736e-05
MARCKS	6.44372e-10	0.71183	0.347	0.078	2.35847e-05
LVRN	6.56071e-10	0.305501	0.061	0.001	2.40129e-05
AP002784.1	6.56071e-10	0.310511	0.061	0.001	2.40129e-05
RNF112	6.56071e-10	0.285021	0.061	0.001	2.40129e-05
ADAMTS12	6.91803e-10	0.742497	0.224	0.035	2.53207e-05
ARF4	7.71058e-10	0.942854	0.408	0.109	2.82215e-05
PKNOX2	8.5446e-10	0.904932	0.408	0.108	3.12741e-05
TSHZ3	8.64829e-10	0.550284	0.204	0.029	3.16536e-05
PLXDC2	9.3198e-10	1.19658	0.694	0.292	3.41114e-05
RAC1	1.02087e-09	0.73879	0.347	0.08	3.7365e-05
LAMA2	1.0315e-09	0.630307	1	0.983	3.7754e-05
OGN	1.06704e-09	0.538187	0.204	0.029	3.90546e-05
POFUT2	1.07483e-09	0.444585	0.143	0.014	3.93399e-05
KCNIP1	1.11318e-09	0.890961	0.204	0.03	4.07436e-05
NT5E	1.1617e-09	0.290949	0.082	0.003	4.25194e-05
LINC02802	1.18875e-09	0.340086	0.082	0.003	4.35093e-05
PDGFRA	1.2618e-09	0.738293	0.286	0.057	4.61831e-05
MYO1B	1.2669e-09	0.619367	0.327	0.07	4.637e-05
CC2D2A	1.40863e-09	0.539615	0.224	0.036	5.15572e-05
LDB3	1.49048e-09	-0.827395	0.878	0.981	5.4553e-05
PCOLCE	1.55064e-09	0.597035	0.184	0.024	5.67549e-05
SLC16A12	1.55462e-09	0.993584	0.327	0.076	5.69005e-05
BBS5	1.79616e-09	0.397676	0.122	0.01	6.57412e-05
PTBP3	1.86635e-09	0.954815	0.388	0.101	6.83103e-05
CTNNA3	2.09541e-09	-0.858871	0.918	0.973	7.66941e-05
AKAP12	2.20336e-09	1.09752	0.306	0.07	8.06452e-05
METTL8	2.25555e-09	0.396376	0.204	0.03	8.25553e-05
NAB2	2.34041e-09	0.359207	0.122	0.01	8.56614e-05
MMP24OS	2.62805e-09	0.622487	0.245	0.044	9.61891e-05
FHOD3	2.74251e-09	-1.10267	0.694	0.892	0.000100379
ANXA5	2.77994e-09	0.905864	0.429	0.121	0.000101749
AP002989.1	2.87163e-09	0.81438	0.184	0.025	0.000105104
C7	2.98394e-09	1.07952	0.653	0.261	0.000109215
DYNC2H1	3.02097e-09	0.877501	0.388	0.104	0.000110571
GOLM1	3.14691e-09	0.37372	0.102	0.007	0.00011518
TPM1	3.24749e-09	-1.01344	0.796	0.907	0.000118861
F2R	3.33807e-09	0.469398	0.204	0.031	0.000122177
AP000857.2	3.504e-09	0.283068	0.102	0.007	0.00012825
EXT1	3.67987e-09	1.35903	0.776	0.435	0.000134687
RSRC1	3.68347e-09	0.759606	0.49	0.151	0.000134819
DCHS2	3.69704e-09	0.271784	0.102	0.007	0.000135315
S100A6	3.72409e-09	0.745176	0.286	0.059	0.000136305
AC007319.1	3.72901e-09	2.26944	0.347	0.096	0.000136486
MUS81	3.87074e-09	0.39578	0.143	0.015	0.000141673
TAF1D	4.38267e-09	0.652752	0.367	0.095	0.00016041
C1S	5.25426e-09	0.991404	0.306	0.071	0.000192311
DIO2	5.33909e-09	0.73095	0.184	0.027	0.000195416
LINC01091	5.59142e-09	1.07553	0.327	0.079	0.000204651
INTS6	5.94307e-09	0.966753	0.653	0.269	0.000217522
SPRED1	5.9836e-09	0.71266	0.327	0.078	0.000219006
TC2N	6.16309e-09	0.555667	0.224	0.038	0.000225575
EHBP1	6.61509e-09	0.910925	0.653	0.27	0.000242119
CNN3	6.71416e-09	0.788975	0.388	0.108	0.000245745
MYOM1	6.76264e-09	-0.863621	0.898	0.987	0.000247519
NAB1	7.55452e-09	0.633826	0.265	0.053	0.000276503
GNB5	8.78431e-09	0.449483	0.122	0.012	0.000321514
EPS8	9.16955e-09	1.02407	0.429	0.132	0.000335615
CPQ	9.33308e-09	1.15842	0.653	0.286	0.0003416
SLC4A7	9.4731e-09	1.35669	0.531	0.194	0.000346725
C1QTNF7	1.00071e-08	0.576445	0.122	0.012	0.000366269
NOTCH2	1.02949e-08	0.834275	0.347	0.09	0.000376805
PLTP	1.03855e-08	0.503494	0.184	0.027	0.000380118
CNRIP1	1.06022e-08	0.365506	0.122	0.012	0.000388051
MT-ND2	1.0915e-08	-0.798869	0.98	1	0.000399501
VIM	1.12577e-08	1.09014	0.551	0.206	0.000412043
PLA2G4A	1.15799e-08	0.450563	0.143	0.016	0.000423837
COL6A1	1.19219e-08	1.26081	0.551	0.207	0.000436352
PXDN	1.25323e-08	0.752303	0.224	0.041	0.000458695
FARP1	1.27278e-08	0.800525	0.306	0.072	0.00046585
ZFP36L2	1.29535e-08	0.872386	0.51	0.17	0.00047411
CYP1B1-AS1	1.3093e-08	0.677947	0.163	0.022	0.000479217
KLHL29	1.51391e-08	0.635922	0.224	0.041	0.000554106
CAMK1D	1.568e-08	0.50688	0.306	0.068	0.000573903
ANXA1	1.57102e-08	0.896718	0.286	0.063	0.000575009
MIR99AHG	1.68608e-08	0.983318	0.939	0.655	0.000617121
TIMP1	1.7952e-08	0.774416	0.204	0.035	0.00065706
GAS1	1.84452e-08	0.477636	0.163	0.022	0.000675112
MN1	1.86013e-08	0.539362	0.184	0.028	0.000680827
AC025809.1	1.89497e-08	0.323707	0.082	0.005	0.000693579
SLC9B1	2.01195e-08	0.32415	0.082	0.005	0.000736394
SEC24D	2.01589e-08	0.994271	0.408	0.127	0.000737835
AGTR1	2.05248e-08	0.374575	0.082	0.005	0.000751228
FBLN2	2.06808e-08	1.05883	0.367	0.104	0.000756939
SH3RF1	2.11377e-08	0.907121	0.408	0.126	0.000773661
BDH2	2.12827e-08	0.400965	0.102	0.008	0.000778969
HSPBP1	2.12827e-08	0.347554	0.102	0.008	0.000778969
FAM163A	2.16323e-08	0.370013	0.102	0.008	0.000791765
PDLIM5	2.2002e-08	-0.821729	0.898	0.955	0.000805295
PRKD3	2.20189e-08	0.773139	0.265	0.058	0.000805915
PCYOX1	2.29303e-08	0.542187	0.286	0.064	0.00083927
CHSY3	2.35148e-08	0.956254	0.265	0.058	0.000860664
AFAP1	2.39993e-08	0.542026	0.204	0.035	0.000878397
OSTF1	2.66186e-08	0.773235	0.204	0.036	0.000974266
LPL	2.66603e-08	-1.18922	0.714	0.863	0.000975795
PPP1R12B	2.7421e-08	-1.00852	0.714	0.893	0.00100364
PAN3	2.87639e-08	0.963415	0.571	0.219	0.00105279
CFH	2.93772e-08	0.568805	0.245	0.049	0.00107523
CD81	3.08431e-08	0.939986	0.469	0.16	0.00112889
BCL2L2-PABPN1	3.09916e-08	0.408248	0.143	0.017	0.00113432
CRISPLD2	3.15547e-08	0.72921	0.224	0.043	0.00115493
WDR19	3.17168e-08	0.812238	0.224	0.044	0.00116087
AL050403.2	3.25216e-08	0.703484	0.184	0.029	0.00119032
AHI1	3.26136e-08	1.02418	0.714	0.329	0.00119369
PTPN12	3.4586e-08	0.962726	0.449	0.151	0.00126588
LIMA1	3.46533e-08	1.13156	0.327	0.089	0.00126834
LRRK1	3.49249e-08	0.407804	0.143	0.017	0.00127828
MFAP5	3.54775e-08	0.863544	0.184	0.029	0.00129851
PLCL1	3.58444e-08	-0.983885	0.714	0.921	0.00131194
PKD2	3.65554e-08	0.954865	0.408	0.126	0.00133796
STARD9	3.69229e-08	0.71673	0.388	0.112	0.00135142
COL5A3	3.75447e-08	0.844559	0.286	0.066	0.00137417
GOLGA2	3.76173e-08	0.505176	0.265	0.057	0.00137683
DPYD	3.8536e-08	0.843585	0.755	0.411	0.00141046
FAS	3.96568e-08	0.293036	0.122	0.013	0.00145148
CCDC191	4.074e-08	0.329102	0.122	0.013	0.00149112
SLC8A1	4.08806e-08	-0.755037	0.959	0.993	0.00149627
SERPINF1	4.10023e-08	0.686062	0.224	0.043	0.00150073
PRPF4	4.2993e-08	0.321172	0.122	0.013	0.00157359
PAK1	4.4691e-08	0.424574	0.184	0.029	0.00163573
SOD3	4.56137e-08	0.547268	0.204	0.036	0.00166951
FGF12	4.68072e-08	-0.75412	0.959	0.994	0.00171319
MYO9A	4.88498e-08	0.891697	0.714	0.33	0.00178795
MYL2	5.21493e-08	-1.11641	0.714	0.886	0.00190872
CSGALNACT2	5.29855e-08	0.868721	0.224	0.045	0.00193932
MYL3	5.45106e-08	-1.19287	0.531	0.775	0.00199514
C1R	5.51465e-08	0.675879	0.245	0.051	0.00201842
RAB32	5.59087e-08	0.292711	0.061	0.002	0.00204632
HOXB3	5.59087e-08	0.204633	0.061	0.002	0.00204632
ADCY1	5.59656e-08	0.653256	0.204	0.037	0.0020484
AL592295.5	5.7291e-08	0.298398	0.061	0.002	0.00209691
CCDC173	5.7291e-08	0.239594	0.061	0.002	0.00209691
AL451165.2	5.87063e-08	0.198027	0.061	0.002	0.00214871
AC022075.1	5.87063e-08	0.30159	0.061	0.002	0.00214871
RPL41	5.92311e-08	1.03043	0.551	0.218	0.00216792
GLYATL2	6.01555e-08	0.313327	0.061	0.002	0.00220175
AP000944.7	6.01555e-08	0.189007	0.061	0.002	0.00220175
DUXAP8	6.01555e-08	0.145064	0.061	0.002	0.00220175
CCNL1	6.06302e-08	0.701918	0.367	0.104	0.00221913
ARHGAP22	6.07148e-08	0.525943	0.286	0.065	0.00222222
AC025280.2	6.16393e-08	0.247749	0.061	0.002	0.00225606
TCF4-AS1	6.16393e-08	0.128843	0.061	0.002	0.00225606
EFCAB13	6.34275e-08	0.58226	0.163	0.024	0.00232151
COPB2	6.44019e-08	0.546382	0.224	0.044	0.00235717
FXYD6	6.56919e-08	0.481487	0.265	0.058	0.00240439
KCNT2	6.6384e-08	0.871869	0.245	0.053	0.00242972
FRMD4B	6.69995e-08	0.956933	0.571	0.246	0.00245225
CADPS2	6.7454e-08	0.99478	0.388	0.124	0.00246888
AC245297.3	6.87242e-08	0.457164	0.143	0.019	0.00251538
MALAT1	6.91594e-08	-0.40538	1	1	0.0025313
CEP112	7.17761e-08	0.899726	0.633	0.265	0.00262708
TUBB6	7.35146e-08	0.600881	0.306	0.075	0.00269071
ZEB1	7.44476e-08	1.05564	0.857	0.51	0.00272485
S100A11	7.48839e-08	0.619848	0.204	0.037	0.00274082
SOX9	7.54522e-08	0.496206	0.163	0.024	0.00276163
AP001528.1	7.61841e-08	0.424913	0.265	0.058	0.00278841
ANKS1B	7.76121e-08	0.938114	0.347	0.098	0.00284068
PPP1R7	7.79134e-08	0.494123	0.143	0.019	0.00285171
GLI3	8.19598e-08	0.821571	0.367	0.109	0.00299981
CMYA5	8.37182e-08	-0.837811	0.857	0.926	0.00306417
MAGI2-AS3	8.50156e-08	0.721542	0.347	0.097	0.00311166
PCNX2	8.61093e-08	0.519956	0.163	0.024	0.00315169
CENPC	8.76939e-08	0.936955	0.367	0.109	0.00320968
RGS6	8.81328e-08	-1.22947	0.49	0.784	0.00322575
IL6ST	8.8542e-08	1.00878	0.49	0.187	0.00324073
ADAM33	9.03121e-08	0.491997	0.143	0.019	0.00330551
KHSRP	9.15097e-08	0.596607	0.184	0.031	0.00334935
RAB8B	9.30607e-08	0.620155	0.265	0.06	0.00340611
NUDT5	9.43263e-08	0.364518	0.163	0.024	0.00345244
EPB41L4A	9.83402e-08	0.951632	0.551	0.211	0.00359935
PMM2	9.9913e-08	0.645739	0.245	0.053	0.00365692
AL139317.5	1.02074e-07	0.487035	0.184	0.031	0.003736
ARHGEF26	1.02277e-07	0.314861	0.143	0.019	0.00374345
NCOA7	1.03182e-07	0.707987	0.265	0.06	0.00377658
ZNF718	1.05714e-07	0.694402	0.306	0.079	0.00386923
JHY	1.05738e-07	0.289207	0.102	0.009	0.0038701
SORBS1	1.06927e-07	-0.702883	0.878	0.973	0.00391365
KIF3A	1.07383e-07	0.586978	0.286	0.068	0.00393032
TNS2	1.0742e-07	0.661877	0.245	0.053	0.0039317
SRPX2	1.08938e-07	0.269325	0.102	0.009	0.00398724
ANKRD1	1.13536e-07	-0.939476	0.776	0.905	0.00415554
CPEB2-DT	1.13915e-07	0.263604	0.102	0.009	0.0041694
ARL6	1.14294e-07	0.368741	0.122	0.014	0.00418329
COL1A1	1.14849e-07	0.574484	0.184	0.031	0.0042036
TSBP1-AS1	1.15752e-07	0.353993	0.122	0.014	0.00423666
ADCY5	1.16749e-07	-1.24231	0.469	0.753	0.00427311
LINC00271	1.20894e-07	0.27038	0.102	0.009	0.00442484
TCP11L1	1.25716e-07	0.516621	0.184	0.031	0.00460134
FGFR1OP2	1.25735e-07	0.567736	0.327	0.087	0.00460201
PREX2	1.28755e-07	0.980627	0.429	0.147	0.00471257
MX2	1.29711e-07	0.242236	0.122	0.014	0.00474756
UBE2E2	1.31757e-07	0.937137	0.837	0.511	0.00482243
HNMT	1.34716e-07	0.414784	0.122	0.014	0.00493074
RGMA	1.35695e-07	0.9036	0.204	0.039	0.00496656
TPST1	1.4033e-07	0.657878	0.286	0.07	0.00513621
TTC14	1.43138e-07	0.705376	0.367	0.11	0.00523899
AC079793.1	1.61225e-07	0.679006	0.082	0.006	0.005901
MAN1A1	1.61733e-07	1.11642	0.469	0.169	0.00591958
GNG12	1.65371e-07	0.667994	0.367	0.108	0.00605275
ADH1B	1.68787e-07	0.835891	0.286	0.071	0.00617778
PTPRS	1.71553e-07	0.769541	0.449	0.154	0.00627903
ERRFI1	1.73274e-07	0.857666	0.204	0.039	0.00634199
RGS22	1.79195e-07	0.234865	0.082	0.006	0.00655872
WAC	1.92966e-07	0.905342	0.653	0.311	0.00706273
CYP4Z1	1.95635e-07	0.447631	0.082	0.006	0.00716045
GBA	2.02612e-07	0.254125	0.082	0.006	0.00741579
CD248	2.0619e-07	0.207935	0.082	0.006	0.00754674
MGST1	2.11275e-07	0.309144	0.184	0.031	0.00773289
CCDC149	2.11734e-07	0.715357	0.245	0.056	0.00774967
EMILIN1	2.13357e-07	0.445325	0.143	0.02	0.00780907
SCD5	2.13357e-07	0.382212	0.143	0.02	0.00780907
AMPH	2.22771e-07	0.514805	0.163	0.025	0.00815364
MT-ND5	2.25136e-07	-0.960921	0.816	0.948	0.0082402
GAB2	2.39474e-07	0.953259	0.51	0.202	0.00876497
ACAP2	2.46486e-07	0.68284	0.51	0.192	0.00902165
CCS	2.61373e-07	0.396228	0.204	0.039	0.00956651
KCND2	2.648e-07	0.868738	0.122	0.015	0.00969194
ZNF423	2.6656e-07	0.676903	0.224	0.048	0.00975637
SNTB2	2.85245e-07	0.643879	0.245	0.056	0.0104403
RFTN1	2.85624e-07	0.738369	0.388	0.122	0.0104541
ZEB2	3.10504e-07	1.02204	0.714	0.382	0.0113648
ATP6V0A1	3.18651e-07	0.572401	0.306	0.082	0.0116629
TENM2	3.33577e-07	-0.884888	0.694	0.868	0.0122093
FAM171A1	3.37643e-07	0.640927	0.224	0.049	0.0123581
CDON	3.57755e-07	0.563791	0.184	0.034	0.0130942
ARHGAP21	3.59049e-07	1.0978	0.633	0.313	0.0131416
CCZ1	3.61233e-07	0.250051	0.122	0.015	0.0132215
SORCS1	3.70046e-07	0.938705	0.224	0.05	0.0135441
CAMK1	3.74468e-07	0.492791	0.102	0.01	0.0137059
SNX9	3.80954e-07	0.676804	0.49	0.181	0.0139433
JAK1	3.8166e-07	0.73823	0.735	0.35	0.0139691
RGL3	3.87888e-07	0.387981	0.122	0.015	0.0141971
RPS18	3.93611e-07	0.444636	0.347	0.098	0.0144066
TDRD7	3.98766e-07	0.513827	0.143	0.021	0.0145952
CCDC174	4.07802e-07	0.277223	0.204	0.039	0.014926
FP671120.4	4.11541e-07	0.283924	0.122	0.015	0.0150628
LONRF3	4.19964e-07	0.523321	0.163	0.027	0.0153711
CD36	4.27788e-07	-1.08167	0.571	0.761	0.0156575
SIPA1	4.28706e-07	0.453562	0.143	0.021	0.0156911
GTF2B	4.49835e-07	0.492466	0.245	0.057	0.0164644
IL33	4.5086e-07	0.5759	0.224	0.049	0.0165019
AC005162.3	4.53883e-07	0.292382	0.102	0.01	0.0166126
LONRF1	4.54278e-07	0.832229	0.265	0.068	0.016627
LINC02208	4.59528e-07	-0.88902	0.816	0.917	0.0168192
GPSM2	4.75115e-07	0.574398	0.163	0.028	0.0173897
KPNA5	4.8111e-07	0.477872	0.245	0.056	0.0176091
IQCG	4.86004e-07	0.324262	0.102	0.01	0.0177882
CASP4	4.95224e-07	0.319832	0.143	0.021	0.0181257
HOOK3	5.15194e-07	0.641695	0.49	0.185	0.0188566
AGO2	5.27179e-07	0.594385	0.469	0.169	0.0192953
CYP7B1	5.27513e-07	0.705325	0.265	0.067	0.0193075
SH3BGRL3	5.31571e-07	0.723331	0.184	0.035	0.019456
MT-ND4	5.33994e-07	-0.698048	1	1	0.0195447
KMT2A	5.67151e-07	0.757693	0.531	0.214	0.0207583
XAF1	5.6893e-07	0.611873	0.245	0.058	0.0208234
TANK	5.7206e-07	0.894676	0.469	0.182	0.020938
IL16	5.75176e-07	0.662216	0.163	0.028	0.021052
ZBTB20-AS5	5.7581e-07	0.458456	0.204	0.042	0.0210752
SORBS2	5.78226e-07	-0.645791	0.898	0.993	0.0211637
ELMO1	6.00597e-07	0.675995	0.449	0.159	0.0219825
TRDN-AS1	6.34436e-07	-0.973374	0.633	0.806	0.023221
NCOA5	6.37374e-07	0.295501	0.204	0.041	0.0233285
ACTN2	6.41495e-07	-0.695471	0.837	0.928	0.0234794
DIPK2A	6.58781e-07	0.445032	0.163	0.028	0.0241121
PFN1	6.75472e-07	0.482144	0.204	0.042	0.024723
TAB2	6.80301e-07	0.720813	0.408	0.144	0.0248997
HACE1	6.89055e-07	0.676013	0.245	0.058	0.0252201
SMIM3	7.01693e-07	0.503699	0.163	0.028	0.0256827
PRTFDC1	7.27412e-07	0.351861	0.163	0.028	0.026624
DNAJC25	7.60838e-07	0.336797	0.163	0.028	0.0278474
CNKSR2	7.67894e-07	0.73562	0.204	0.043	0.0281057
AL354740.1	7.92898e-07	0.368522	0.143	0.022	0.0290209
NFIA	8.09644e-07	0.695359	0.939	0.786	0.0296338
LRP1	8.17444e-07	1.05369	0.429	0.16	0.0299193
SPRY2	8.18944e-07	0.354574	0.204	0.042	0.0299742
USP12	8.29836e-07	0.668643	0.388	0.126	0.0303728
NPHP3	8.44499e-07	0.747469	0.327	0.1	0.0309095
MAP4K5	8.44561e-07	0.643826	0.327	0.096	0.0309118
CDH2	8.5487e-07	-0.968003	0.592	0.819	0.0312891
STAMBPL1	8.75362e-07	0.420672	0.143	0.022	0.0320391
LINC01088	8.99446e-07	0.654259	0.224	0.051	0.0329206
DMD	9.0947e-07	-0.687286	0.939	0.983	0.0332875
SRGAP2B	9.2863e-07	0.531609	0.122	0.016	0.0339888
TRIM22	9.2874e-07	0.321851	0.143	0.022	0.0339928
SERINC5	9.455e-07	0.926446	0.408	0.146	0.0346062
ARPC1B	9.62113e-07	0.621639	0.184	0.036	0.0352143
DPF3	9.72127e-07	-1.14256	0.469	0.7	0.0355808
PLAGL1	9.87559e-07	1.12354	0.367	0.125	0.0361456
CREB3L2	1.01387e-06	0.842979	0.388	0.134	0.0371085
PER2	1.01613e-06	0.529475	0.265	0.068	0.0371915
DERA	1.02967e-06	0.523547	0.286	0.075	0.0376871
FAAH2	1.06184e-06	0.241446	0.122	0.016	0.0388644
AL359643.3	1.06701e-06	0.310106	0.082	0.007	0.0390536
HEXD-IT1	1.08385e-06	0.341064	0.082	0.007	0.0396701
ITPRIPL2	1.08576e-06	0.313802	0.122	0.016	0.0397398
EMP3	1.09393e-06	0.574899	0.102	0.012	0.040039
GALR1	1.11976e-06	0.407308	0.061	0.003	0.0409843
HYMAI	1.13594e-06	0.337812	0.082	0.007	0.0415765
CACNB2	1.13841e-06	-0.810144	0.857	0.918	0.041667
PCDH18	1.15383e-06	0.220055	0.082	0.007	0.0422313
PLSCR3	1.16576e-06	0.311434	0.061	0.003	0.0426682
AL035427.1	1.16576e-06	0.241322	0.061	0.003	0.0426682
LINC02351	1.18944e-06	0.30251	0.061	0.003	0.0435349
AC109587.1	1.19043e-06	0.16829	0.082	0.007	0.0435708
AC012404.1	1.20914e-06	0.161706	0.082	0.007	0.0442559
AC036214.1	1.21359e-06	0.177612	0.061	0.003	0.0444185
NOTCH2NLA	1.2382e-06	0.228433	0.061	0.003	0.0453193
LIPH	1.2382e-06	0.286424	0.061	0.003	0.0453193
IGDCC4	1.2382e-06	0.226734	0.061	0.003	0.0453193
AC009041.2	1.2382e-06	0.180551	0.061	0.003	0.0453193
AC007846.1	1.2382e-06	0.1539	0.061	0.003	0.0453193
PTGFR	1.26329e-06	0.161482	0.061	0.003	0.0462377
AC092958.1	1.26329e-06	0.129506	0.061	0.003	0.0462377
ARMC5	1.26329e-06	0.133353	0.061	0.003	0.0462377
SMC5	1.27631e-06	0.769192	0.469	0.183	0.0467143
ARRDC2	1.28887e-06	0.112826	0.061	0.003	0.047174
KCTD8	1.32407e-06	0.642528	0.143	0.023	0.0484622
AC012459.1	1.32489e-06	0.377754	0.102	0.012	0.0484924
TCF21	1.32489e-06	0.437448	0.102	0.012	0.0484924
DLC1	1.32721e-06	0.913172	0.857	0.618	0.0485774
SOBP	1.35672e-06	0.896577	0.592	0.304	0.0496575
SPRED2	1.3569e-06	0.859462	0.449	0.175	0.0496638
PDGFRL	1.35902e-06	0.329835	0.102	0.012	0.0497416
AC092353.2	1.42985e-06	-0.828364	0.735	0.9	0.0523341
EVC2	1.52336e-06	0.281721	0.102	0.012	0.0557566
EMP1	1.52922e-06	1.25934	0.327	0.107	0.055971
HIVEP1	1.57792e-06	0.83045	0.388	0.133	0.0577536
AKAP6	1.59313e-06	-0.775358	0.796	0.883	0.0583103
STX12	1.62476e-06	0.569255	0.347	0.109	0.0594678
ESD	1.64415e-06	0.340516	0.224	0.051	0.0601776
NR4A3	1.72554e-06	-0.86948	0.714	0.878	0.0631567
BACH2	1.76875e-06	0.762946	0.469	0.182	0.0647382
COPB1	1.77023e-06	0.613588	0.286	0.08	0.0647921
CREB5	1.7713e-06	1.00093	0.673	0.345	0.0648315
ZBTB20	1.80105e-06	0.554711	1	0.946	0.0659203
MYH7B	1.85268e-06	-1.00852	0.469	0.724	0.0678098
ABLIM1	1.85648e-06	-0.606254	0.898	0.972	0.067949
APOE	1.87797e-06	1.83993	0.245	0.065	0.0687357
MYOZ2	1.89276e-06	-1.17183	0.388	0.669	0.0692771
ITGA5	1.92818e-06	0.794356	0.306	0.092	0.0705732
SIN3A	1.97416e-06	0.504674	0.245	0.061	0.0722561
ZMYM2	2.04556e-06	0.75314	0.612	0.291	0.0748697
ADGRA2	2.04663e-06	0.343997	0.143	0.023	0.0749087
UCHL3	2.04956e-06	0.379776	0.163	0.03	0.0750161
AL133346.1	2.06858e-06	0.476032	0.122	0.017	0.0757122
CSTB	2.13541e-06	0.324658	0.122	0.017	0.078158
MECOM	2.18256e-06	1.07525	0.633	0.319	0.0798839
C9orf78	2.25141e-06	0.3657	0.122	0.017	0.0824038
PRICKLE2	2.38427e-06	0.701551	0.367	0.124	0.0872665
AL590807.1	2.42402e-06	0.296663	0.122	0.017	0.0887216
DPYSL2	2.60287e-06	0.601683	0.408	0.143	0.0952675
RPS6KA5	2.63798e-06	0.676072	0.347	0.111	0.0965528
PLCH1	2.67758e-06	0.266918	0.163	0.03	0.098002
BTBD10	2.78052e-06	0.487215	0.286	0.08	0.10177
DICER1	2.80279e-06	0.758901	0.388	0.133	0.102585
PYGO1	2.83304e-06	0.491453	0.143	0.024	0.103692
PPP2R3C	2.84508e-06	0.580568	0.224	0.054	0.104133
FAM126A	2.89037e-06	0.645004	0.449	0.171	0.10579
UEVLD	3.07381e-06	0.440175	0.204	0.046	0.112505
ANKRD50	3.39925e-06	0.507705	0.184	0.039	0.124416
MYCBP2	3.40466e-06	0.891526	0.571	0.277	0.124614
CFD	3.4155e-06	1.04809	0.49	0.213	0.125011
CCNH	3.42807e-06	1.04561	0.592	0.289	0.125471
RPL24	3.46274e-06	0.435603	0.347	0.108	0.12674
AC025171.2	3.55266e-06	0.375045	0.102	0.013	0.130031
MAGI3	3.57909e-06	0.67767	0.469	0.178	0.130998
TTC39B	3.65081e-06	0.308366	0.143	0.024	0.133623
DNM3OS	3.725e-06	0.299532	0.102	0.013	0.136339
LTBP3	3.75273e-06	0.389513	0.265	0.072	0.137354
MAP1A	3.75857e-06	0.523223	0.122	0.019	0.137567
GPRC5A	3.77481e-06	1.12426	0.082	0.008	0.138162
UFM1	3.93193e-06	0.405133	0.204	0.046	0.143913
PHF3	3.93379e-06	0.689383	0.408	0.151	0.143981
CASP7	3.99861e-06	0.297895	0.102	0.013	0.146353
PCDH9	4.04929e-06	0.829252	0.918	0.74	0.148208
SEM1	4.06727e-06	0.744088	0.429	0.169	0.148866
FYN	4.07836e-06	0.852886	0.49	0.212	0.149272
TP53I13	4.1916e-06	0.310685	0.102	0.013	0.153417
RIOX2	4.20003e-06	0.601736	0.122	0.019	0.153725
NBPF9	4.32879e-06	0.327415	0.122	0.019	0.158438
GUCY1B1	4.36083e-06	0.738015	0.224	0.058	0.159611
RABAC1	4.36877e-06	0.258103	0.143	0.024	0.159901
GALNT13	4.37254e-06	0.508346	0.122	0.019	0.16004
SDF2	4.39351e-06	0.238207	0.102	0.013	0.160807
ZNF317	4.39351e-06	0.257132	0.102	0.013	0.160807
AC097522.2	4.39389e-06	-0.927476	0.653	0.826	0.160821
SSBP2	4.4028e-06	1.01359	0.653	0.39	0.161147
DGKB	4.42389e-06	1.12707	0.265	0.078	0.161919
UAP1	4.44239e-06	0.632569	0.204	0.048	0.162596
DIS3	4.5818e-06	0.298874	0.163	0.031	0.167699
IL4R	4.60263e-06	0.242827	0.082	0.008	0.168461
DAB2	4.65062e-06	0.206632	0.143	0.024	0.170217
GALNT2	4.68633e-06	0.693147	0.327	0.107	0.171524
ST3GAL5	4.76946e-06	0.129451	0.102	0.013	0.174567
PAK3	4.80137e-06	0.266868	0.082	0.008	0.175735
RUFY2	4.81449e-06	0.702448	0.306	0.097	0.176215
RPS2	4.83001e-06	0.692056	0.347	0.116	0.176783
FAM106A	4.86473e-06	0.533564	0.184	0.041	0.178054
SLC25A43	4.86943e-06	0.238871	0.082	0.008	0.178226
SH3PXD2B	4.91027e-06	0.529646	0.163	0.032	0.179721
AKT1S1	4.93985e-06	0.142444	0.102	0.013	0.180804
MGMT	4.98069e-06	0.71327	0.408	0.152	0.182298
AC009271.1	5.00832e-06	0.37657	0.082	0.008	0.18331
EMILIN3	5.00832e-06	0.303215	0.082	0.008	0.18331
PPP3CA	5.01971e-06	1.02925	0.469	0.204	0.183727
XIRP2	5.02386e-06	-1.13282	0.531	0.72	0.183878
NTRK2	5.05665e-06	0.363517	0.122	0.019	0.185078
EML4	5.0686e-06	0.88852	0.327	0.109	0.185516
CWC22	5.09329e-06	0.556019	0.204	0.049	0.18642
UHRF1BP1L	5.12185e-06	0.650381	0.265	0.075	0.187465
CRYBG3	5.14634e-06	0.677151	0.429	0.169	0.188361
ECE1	5.22634e-06	0.536155	0.286	0.085	0.191289
BEX3	5.35224e-06	0.536088	0.143	0.025	0.195898
FIP1L1	5.36307e-06	0.375788	0.327	0.101	0.196294
TASP1	5.4191e-06	0.478328	0.347	0.114	0.198345
RPL7A	5.49757e-06	0.487335	0.327	0.103	0.201217
ALG14	5.53248e-06	0.565838	0.184	0.041	0.202494
ABHD5	5.63038e-06	0.721783	0.184	0.042	0.206078
CPSF6	5.65608e-06	0.613528	0.408	0.159	0.207018
SASH1	5.77961e-06	0.766145	0.592	0.283	0.21154
FSTL1	5.98228e-06	0.859663	0.592	0.284	0.218957
KREMEN1	6.00469e-06	0.531243	0.204	0.049	0.219778
DDX5	6.19762e-06	0.726513	0.714	0.387	0.226839
GINM1	6.2337e-06	0.483509	0.245	0.066	0.22816
PDCD6IP	6.25186e-06	0.62996	0.347	0.118	0.228824
RPS10	6.31269e-06	0.409196	0.143	0.025	0.231051
NR3C1	6.64664e-06	0.828526	0.612	0.307	0.243274
CNTRL	6.71032e-06	0.665878	0.184	0.042	0.245604
BTBD3	6.75591e-06	0.373043	0.286	0.083	0.247273
CAMK2N1	6.76889e-06	0.451038	0.163	0.032	0.247748
DMTF1	6.95547e-06	0.645106	0.388	0.141	0.254577
ARIH1	6.98549e-06	0.866622	0.673	0.397	0.255676
TLR4	7.01137e-06	0.558789	0.122	0.02	0.256623
GALNT10	7.28301e-06	0.81321	0.286	0.089	0.266566
FLRT2	7.33775e-06	1.23853	0.163	0.034	0.268569
OPHN1	7.34275e-06	0.777988	0.49	0.209	0.268752
PTMA	7.5302e-06	0.509849	0.388	0.138	0.275613
LRRC8D	7.61745e-06	0.546576	0.306	0.097	0.278806
GLI2	7.71962e-06	0.672331	0.122	0.02	0.282546
FCHO2	7.78171e-06	0.739637	0.367	0.137	0.284818
AP001347.1	7.91988e-06	0.449179	0.163	0.034	0.289876
HLTF	7.92262e-06	0.526439	0.204	0.05	0.289976
TNNI3	7.97314e-06	-0.779797	0.714	0.881	0.291825
OSMR	7.98681e-06	0.614167	0.184	0.042	0.292325
GOLPH3	8.09282e-06	0.740536	0.408	0.162	0.296205
ERBIN	8.23315e-06	0.706931	0.571	0.269	0.301342
ATP10A	8.52956e-06	0.276028	0.143	0.025	0.312191
TACC2	8.56887e-06	-0.868348	0.714	0.813	0.313629
MSH5	8.58464e-06	0.445689	0.102	0.014	0.314206
GPCPD1	8.60034e-06	0.445778	0.367	0.126	0.314781
ASXL1	8.76571e-06	0.691037	0.388	0.145	0.320834
AC090114.2	9.08322e-06	0.410213	0.122	0.02	0.332455
KRIT1	9.1139e-06	0.623389	0.286	0.09	0.333578
DHX36	9.23528e-06	0.485597	0.347	0.118	0.338021
ACTA1	9.36097e-06	-1.23278	0.327	0.596	0.342621
BMPER	9.3635e-06	0.508911	0.143	0.027	0.342713
SBF2	9.36739e-06	0.721659	0.776	0.486	0.342856
TRIL	9.37875e-06	0.442356	0.102	0.014	0.343272
FHIT	9.45095e-06	-0.857014	0.714	0.823	0.345914
PLN	9.55643e-06	-1.35053	0.122	0.416	0.349775
GMPPA	9.58798e-06	0.298057	0.102	0.014	0.35093
AC005323.2	9.77515e-06	0.326472	0.061	0.005	0.35778
MCM7	9.94342e-06	0.226289	0.061	0.005	0.363939
AC124254.2	9.94342e-06	0.394703	0.061	0.005	0.363939
PCOLCE2	1.0107e-05	1.02103	0.265	0.081	0.369927
MEIS3	1.01145e-05	0.379632	0.061	0.005	0.370199
NTN4	1.01192e-05	1.35076	0.408	0.171	0.370372
TASOR2	1.01687e-05	0.764676	0.429	0.176	0.372186
QTRT1	1.02428e-05	0.2739	0.102	0.014	0.374895
LINC01967	1.02883e-05	0.202034	0.061	0.005	0.376562
ORAI2	1.02883e-05	0.243592	0.061	0.005	0.376562
AKR1C1	1.02883e-05	0.23977	0.061	0.005	0.376562
CMTM1	1.02883e-05	0.247605	0.061	0.005	0.376562
NRIP1	1.03356e-05	0.681735	0.449	0.187	0.378295
ZNF557	1.0356e-05	0.254514	0.102	0.014	0.379038
ELF1	1.04461e-05	0.631229	0.694	0.36	0.382339
PHLDB1	1.05365e-05	0.724133	0.388	0.148	0.385645
TSC22D3	1.06852e-05	0.740946	0.245	0.068	0.391088
DPYSL3	1.06887e-05	0.298001	0.204	0.049	0.391218
ACAD8	1.07028e-05	0.315773	0.102	0.014	0.391732
CLSPN	1.08271e-05	0.274009	0.061	0.005	0.396283
PPT2	1.08271e-05	0.14315	0.061	0.005	0.396283
LRFN4	1.08271e-05	0.27975	0.061	0.005	0.396283
MDP1	1.08271e-05	0.140458	0.061	0.005	0.396283
ZNF730	1.08271e-05	0.156879	0.061	0.005	0.396283
MEDAG	1.10126e-05	0.194765	0.061	0.005	0.403073
AL445426.1	1.10606e-05	0.203199	0.102	0.014	0.404831
EDNRB	1.1118e-05	0.682065	0.184	0.043	0.406931
SRSF10	1.1177e-05	0.594331	0.286	0.089	0.409088
TET1	1.1189e-05	0.492913	0.265	0.079	0.409529
SOCS2-AS1	1.12012e-05	0.163807	0.061	0.005	0.409974
CDK11B	1.12982e-05	0.181342	0.122	0.02	0.413525
TRIM9	1.13056e-05	0.300681	0.102	0.014	0.413794
HAPLN3	1.13928e-05	0.0683111	0.061	0.005	0.416988
DNAJB14	1.13996e-05	0.562433	0.286	0.089	0.417237
GPR89B	1.14361e-05	0.345521	0.143	0.027	0.418573
PRPF3	1.1477e-05	0.558468	0.204	0.051	0.420068
ELF2	1.16491e-05	0.824185	0.571	0.29	0.426367
RBMS3-AS2	1.18151e-05	0.533069	0.184	0.043	0.432446
KDM5B	1.1816e-05	0.52331	0.286	0.088	0.432479
ZDBF2	1.19081e-05	0.276379	0.163	0.034	0.435848
ZSWIM4	1.19407e-05	0.133632	0.102	0.014	0.43704
EGR1	1.23078e-05	0.828768	0.776	0.57	0.450477
SGCD	1.23999e-05	-0.618502	0.939	0.963	0.453847
ANKRD36	1.26444e-05	0.50272	0.347	0.121	0.462796
RPS21	1.28502e-05	0.571742	0.224	0.06	0.47033
CMTM8	1.28962e-05	0.53789	0.184	0.043	0.472012
SENP7	1.30061e-05	0.746659	0.367	0.138	0.476037
TTC21B	1.32683e-05	0.666725	0.306	0.105	0.485632
HSBP1	1.32708e-05	0.225578	0.143	0.027	0.485723
PRPF39	1.3303e-05	0.40032	0.163	0.035	0.486903
SPATS2L	1.34758e-05	0.670135	0.49	0.216	0.493228
MXRA8	1.36026e-05	0.268699	0.143	0.027	0.49787
TPRG1	1.36992e-05	0.435812	0.184	0.043	0.501403
WDR35	1.38006e-05	0.427148	0.163	0.035	0.505117
MB	1.3845e-05	-1.24016	0.367	0.582	0.506742
FMNL3	1.39424e-05	0.235294	0.143	0.027	0.510306
FTX	1.39674e-05	0.715462	0.857	0.779	0.511219
SPEN	1.3997e-05	0.618245	0.408	0.159	0.512305
MPP6	1.42456e-05	0.370542	0.082	0.009	0.521404
MAP3K8	1.44213e-05	0.491018	0.163	0.035	0.527832
ARFIP1	1.44718e-05	0.475338	0.367	0.132	0.529682
SLFN11	1.46464e-05	0.22502	0.143	0.027	0.536072
MXD4	1.48885e-05	0.238958	0.143	0.027	0.544933
AC027698.1	1.51898e-05	0.279912	0.082	0.009	0.555962
FXYD5	1.51898e-05	0.365975	0.082	0.009	0.555962
IGFBP6	1.54796e-05	0.68526	0.122	0.021	0.566569
GNL3L	1.55659e-05	0.676609	0.184	0.044	0.569727
MAGI1	1.55831e-05	-0.652742	0.694	0.864	0.570358
SCARB2	1.55956e-05	0.529655	0.265	0.08	0.570814
TBC1D16	1.56577e-05	0.38718	0.184	0.043	0.573089
AC048341.1	1.56661e-05	0.379582	0.143	0.028	0.573396
TERF2IP	1.56675e-05	0.818231	0.204	0.053	0.573447
MVK	1.59878e-05	0.341318	0.082	0.009	0.58517
LINC00630	1.60054e-05	0.361646	0.204	0.051	0.585813
YLPM1	1.611e-05	0.604106	0.388	0.145	0.589643
GLRX2	1.61934e-05	0.368594	0.082	0.009	0.592696
ADAMTSL4-AS1	1.62006e-05	0.527659	0.122	0.021	0.592957
PHIP	1.6207e-05	0.763124	0.653	0.337	0.593193
IFI16	1.63275e-05	0.431065	0.163	0.035	0.597603
LINC00623	1.66124e-05	0.288486	0.082	0.009	0.60803
SPRY4	1.66124e-05	0.301984	0.082	0.009	0.60803
AC020916.1	1.68245e-05	0.994673	0.51	0.254	0.615793
TRMT1	1.68257e-05	0.132281	0.082	0.009	0.615837
ANOS1	1.69516e-05	0.693337	0.204	0.053	0.620445
DNM1	1.69762e-05	0.390698	0.143	0.028	0.621346
ABRAXAS2	1.70559e-05	0.254746	0.163	0.035	0.624263
STEAP4	1.71128e-05	0.464024	0.143	0.028	0.626345
INPP1	1.73055e-05	0.294784	0.163	0.035	0.633399
ZCCHC24	1.7398e-05	0.43476	0.245	0.07	0.636783
MGP	1.7502e-05	0.992126	0.49	0.24	0.640591
RABEP1	1.76946e-05	0.531696	0.571	0.257	0.64764
VGLL3	1.77397e-05	0.390646	0.122	0.021	0.64929
TMF1	1.77427e-05	0.513789	0.204	0.052	0.6494
AC012291.3	1.77937e-05	0.480773	0.163	0.036	0.651266
TSPAN5	1.80754e-05	0.347897	0.163	0.035	0.661577
FBXO17	1.82279e-05	0.313279	0.122	0.021	0.667161
MAP3K1	1.87466e-05	0.564284	0.245	0.072	0.686145
H3F3B	1.87481e-05	0.670271	0.265	0.082	0.686199
ADAM17	1.87918e-05	0.679102	0.347	0.129	0.687798
THSD4	1.89741e-05	-0.603495	0.796	0.927	0.694472
FAM102B	1.90098e-05	0.401421	0.204	0.051	0.695778
NRDC	1.90836e-05	0.398907	0.449	0.176	0.698478
TMEM254	1.94134e-05	0.390356	0.102	0.015	0.710549
CEP89	1.96016e-05	0.352773	0.143	0.028	0.717438
FBXO25	1.96208e-05	0.420819	0.224	0.061	0.718142
SMAD4	1.97343e-05	0.635576	0.327	0.117	0.722295
MLXIP	1.98154e-05	0.628927	0.265	0.083	0.725263
AC068587.4	2.013e-05	0.250608	0.122	0.021	0.736779
RAB23	2.02354e-05	0.255711	0.143	0.028	0.740636
CAPZB	2.04186e-05	0.688499	0.592	0.3	0.74734
SCAF4	2.08726e-05	0.497661	0.306	0.102	0.763958
GNA12	2.08914e-05	0.708315	0.388	0.152	0.764645
KAT6A	2.10291e-05	0.739699	0.551	0.269	0.769684
JUND	2.15412e-05	0.607534	0.51	0.231	0.788431
APLNR	2.1562e-05	0.265938	0.143	0.028	0.789191
MYADM	2.17135e-05	0.423093	0.224	0.061	0.794734
FBLN1	2.19193e-05	0.929827	0.286	0.097	0.802266
ERICH1	2.2035e-05	0.364069	0.163	0.036	0.806503
TDP1	2.22079e-05	0.351594	0.102	0.015	0.81283
PYROXD1	2.24328e-05	0.197861	0.143	0.028	0.821061
C1RL	2.2438e-05	0.318555	0.102	0.015	0.821253
GCNA	2.2438e-05	0.421628	0.102	0.015	0.821253
FARP2	2.24588e-05	0.681143	0.306	0.105	0.822016
ECM1	2.28456e-05	0.293021	0.163	0.035	0.836173
MAP7D3	2.32053e-05	0.563494	0.143	0.029	0.849336
AUP1	2.41045e-05	0.377132	0.184	0.044	0.882248
PDE4DIP	2.43056e-05	-0.833535	0.592	0.742	0.88961
KIAA1328	2.44738e-05	0.68771	0.469	0.202	0.895765
ETS1	2.49625e-05	0.570974	0.347	0.125	0.913651
APRT	2.51238e-05	0.250512	0.102	0.015	0.919557
MYDGF	2.53715e-05	0.417028	0.143	0.029	0.928622
RPS6KC1	2.62299e-05	0.625447	0.429	0.178	0.960042
MEPCE	2.64236e-05	0.541056	0.122	0.022	0.967132
POLR2A	2.67834e-05	0.637203	0.408	0.165	0.9803
SMAD3	2.71231e-05	0.753232	0.408	0.168	0.992732
YWHAB	2.71232e-05	0.66563	0.265	0.087	0.992737
FAM149B1	2.71565e-05	0.506482	0.163	0.037	0.993954
ZCCHC7	2.73852e-05	0.783258	0.694	0.417	1
DCTN2	2.74174e-05	0.332076	0.184	0.044	1
CROCC	2.76126e-05	0.297779	0.163	0.036	1
TUG1	2.81237e-05	0.515857	0.224	0.065	1
THUMPD3-AS1	2.81577e-05	0.553836	0.286	0.094	1
CCSER1	2.82504e-05	-0.816558	0.633	0.812	1
BAZ2A	2.82592e-05	0.65367	0.306	0.107	1
WIPF1	2.85232e-05	0.667087	0.367	0.141	1
TSPAN4	2.91841e-05	0.494398	0.204	0.053	1
DES	2.938e-05	-0.805608	0.633	0.791	1
DTNA	2.93859e-05	-0.780733	0.633	0.793	1
PTPRD	2.94581e-05	0.670762	0.429	0.176	1
ANO1	2.96041e-05	0.354027	0.143	0.029	1
ARHGAP32	2.98096e-05	0.771338	0.327	0.124	1
ZNF140	3.00625e-05	0.280618	0.143	0.029	1
ADAMTS9-AS2	3.03874e-05	0.725111	0.49	0.221	1
ELOVL5	3.04707e-05	0.591558	0.469	0.209	1
KCNS3	3.09995e-05	0.370633	0.143	0.029	1
IQCB1	3.21112e-05	0.524239	0.224	0.065	1
KLF9	3.28226e-05	0.495807	0.347	0.124	1
FBLN5	3.34042e-05	0.419857	0.204	0.053	1
COQ10B	3.39642e-05	0.355388	0.184	0.045	1
KIAA0040	3.42565e-05	0.327955	0.122	0.022	1
COL4A1	3.47165e-05	0.701801	0.592	0.292	1
NME2	3.61161e-05	0.251273	0.143	0.029	1
FAM3C	3.62839e-05	0.45531	0.204	0.054	1
TRIP4	3.68902e-05	0.576186	0.265	0.086	1
COPA	3.72449e-05	0.691697	0.367	0.144	1
ITGA8	3.72657e-05	0.412442	0.163	0.037	1
TRPC1	3.73018e-05	0.659801	0.429	0.175	1
NECTIN3	3.73148e-05	0.492928	0.204	0.056	1
LEPR	3.7347e-05	0.393235	0.204	0.054	1
ZCCHC10	3.75632e-05	0.485996	0.204	0.054	1
MME	3.79697e-05	0.308233	0.122	0.022	1
GPBP1	3.7975e-05	0.511994	0.633	0.321	1
LGR4	3.84374e-05	0.758241	0.388	0.165	1
C11orf49	3.84789e-05	0.662231	0.367	0.144	1
ITGA11	3.87056e-05	0.508997	0.163	0.038	1
MEOX2	3.89243e-05	0.597813	0.245	0.075	1
SUB1	3.92863e-05	0.487594	0.286	0.094	1
SRSF11	3.94875e-05	0.472162	0.551	0.26	1
PAK2	3.9669e-05	0.502409	0.367	0.141	1
AP002495.1	3.98316e-05	0.566876	0.122	0.023	1
ANKRD49	4.1294e-05	0.266562	0.082	0.01	1
PDZRN3	4.22769e-05	-0.749274	0.714	0.853	1
GET1	4.2299e-05	0.381688	0.102	0.016	1
TMEM241	4.24954e-05	0.468566	0.184	0.046	1
SHISA3	4.27122e-05	0.425311	0.102	0.016	1
MYOC	4.2772e-05	0.400407	0.082	0.01	1
RACK1	4.3532e-05	0.589505	0.306	0.109	1
ZNF430	4.48368e-05	0.465648	0.102	0.016	1
PEG3	4.53476e-05	0.240098	0.082	0.01	1
NEPRO	4.552e-05	0.485061	0.122	0.023	1
S1PR2	4.58801e-05	0.238687	0.082	0.01	1
EPHB2	4.59362e-05	0.300568	0.102	0.016	1
SYT17	4.61592e-05	0.365164	0.102	0.016	1
KIAA1217	4.62475e-05	-0.846345	0.592	0.716	1
BMI1	4.64185e-05	0.344566	0.082	0.01	1
CRLF1	4.64185e-05	0.362263	0.082	0.01	1
SMURF2	4.65483e-05	0.641583	0.347	0.13	1
PI16	4.66082e-05	0.461675	0.102	0.016	1
FSIP2	4.75186e-05	0.332952	0.102	0.016	1
FAM49A	4.76356e-05	0.423771	0.163	0.038	1
CBWD1	4.76356e-05	0.355631	0.163	0.038	1
ZDHHC21	4.77281e-05	0.699826	0.408	0.183	1
POC5	4.798e-05	0.350856	0.102	0.016	1
TBCB	4.798e-05	0.317176	0.102	0.016	1
CLIP3	4.80698e-05	0.267618	0.082	0.01	1
RRP36	4.86325e-05	0.221117	0.082	0.01	1
LARGE1	4.86347e-05	-0.650046	0.857	0.913	1
NUP205	4.89209e-05	0.348397	0.163	0.038	1
CYP4F12	4.92015e-05	0.166238	0.082	0.01	1
WTAP	4.92345e-05	0.491874	0.265	0.088	1
CLINT1	4.94903e-05	0.449164	0.286	0.096	1
ZNF451	4.97279e-05	0.667331	0.347	0.136	1
DDX39B	4.97279e-05	0.659862	0.347	0.136	1
PRKAA1	4.98252e-05	0.646657	0.265	0.09	1
SPRY4-AS1	4.98689e-05	0.382042	0.122	0.023	1
C1GALT1C1	4.99384e-05	0.334823	0.061	0.006	1
ZFP36L1	5.01703e-05	0.586212	0.347	0.13	1
TBC1D23	5.09344e-05	0.625539	0.286	0.1	1
PRKAB1	5.09464e-05	0.157911	0.082	0.01	1
TNNI3K	5.15124e-05	-0.689001	0.694	0.835	1
TMEM176B	5.1541e-05	0.0884443	0.082	0.01	1
NLRP1	5.20132e-05	0.339385	0.184	0.046	1
BFAR	5.2083e-05	0.303268	0.143	0.03	1
ZMYND19	5.21983e-05	0.23843	0.061	0.006	1
TGOLN2	5.24905e-05	0.248207	0.224	0.064	1
ANGPTL1	5.28347e-05	0.186297	0.102	0.016	1
SNRPB2	5.28347e-05	0.16119	0.102	0.016	1
ITPKC	5.28383e-05	0.462572	0.122	0.023	1
CDK14	5.28422e-05	0.619061	0.673	0.36	1
LINC01266	5.29728e-05	0.518217	0.061	0.006	1
RGS4	5.33641e-05	0.328453	0.061	0.006	1
LINC00960	5.37583e-05	0.241245	0.061	0.006	1
ZNF202	5.37583e-05	0.150881	0.061	0.006	1
TNFRSF21	5.44308e-05	0.32889	0.143	0.03	1
TMEM45A	5.45548e-05	0.205708	0.061	0.006	1
SPATA18	5.45548e-05	0.289106	0.061	0.006	1
MOSPD3	5.45548e-05	0.224018	0.061	0.006	1
PHF19	5.45548e-05	0.42581	0.061	0.006	1
MNS1	5.45548e-05	0.28974	0.061	0.006	1
TPPP3	5.45548e-05	0.269235	0.061	0.006	1
GCFC2	5.45963e-05	0.406136	0.245	0.076	1
C1orf109	5.53625e-05	0.159876	0.061	0.006	1
HECTD3	5.53625e-05	0.233944	0.061	0.006	1
LINC02580	5.53625e-05	0.239452	0.061	0.006	1
SERPINE2	5.54332e-05	0.14503	0.102	0.016	1
PLCD1	5.7012e-05	0.186181	0.061	0.006	1
FST	5.7854e-05	0.115774	0.061	0.006	1
SLC35B3	5.83224e-05	0.297678	0.122	0.023	1
SLC39A10	5.83798e-05	0.432054	0.184	0.048	1
MRPL18	5.87079e-05	0.105664	0.061	0.006	1
BRWD1	5.88468e-05	0.537378	0.673	0.348	1
MYOM2	5.95022e-05	-0.691788	0.673	0.874	1
FAM198B-AS1	5.95927e-05	0.572482	0.306	0.11	1
NRAP	6.07519e-05	-0.802911	0.49	0.708	1
NFKB1	6.10139e-05	0.634599	0.367	0.147	1
MICAL3	6.12894e-05	-0.867646	0.592	0.721	1
PRKRA	6.19825e-05	0.345042	0.184	0.048	1
OSBPL10	6.28851e-05	0.316764	0.163	0.038	1
PLOD3	6.32999e-05	0.275832	0.122	0.023	1
KBTBD2	6.42441e-05	0.380667	0.184	0.048	1
SRP54	6.46472e-05	0.572572	0.204	0.058	1
TUT7	6.4894e-05	0.674733	0.265	0.09	1
AC108519.1	6.54013e-05	0.22606	0.122	0.023	1
INTS6L	6.55896e-05	0.511718	0.143	0.031	1
TMEM39A	6.65358e-05	0.370289	0.143	0.031	1
GPATCH8	6.6948e-05	0.645113	0.673	0.407	1
ANXA11	6.75167e-05	0.734968	0.408	0.177	1
IQSEC1	6.79596e-05	0.65058	0.408	0.174	1
CDK13	6.81704e-05	0.566703	0.612	0.317	1
SGPP1	6.82019e-05	0.650173	0.245	0.081	1
MBNL1	6.84681e-05	0.712668	0.816	0.659	1
ZC2HC1A	6.94525e-05	0.300522	0.143	0.031	1
REEP3	6.94637e-05	0.485106	0.388	0.155	1
RUSC2	7.02692e-05	0.712449	0.327	0.124	1
WWTR1	7.06049e-05	0.57207	0.531	0.258	1
SENP5	7.07268e-05	0.562611	0.367	0.148	1
SLC26A3	7.1687e-05	-1.22925	0.061	0.334	1
ATP1B3	7.24621e-05	0.905198	0.347	0.132	1
ALDH3A2	7.25002e-05	0.386947	0.204	0.058	1
FOXO1	7.32097e-05	0.622956	0.592	0.309	1
PPP2CB	7.46319e-05	0.541809	0.551	0.256	1
KLC1	7.52223e-05	0.690996	0.469	0.224	1
RAP1A	7.53334e-05	0.512159	0.531	0.254	1
NUCB2	7.62895e-05	0.519641	0.224	0.068	1
BCAP29	7.6991e-05	0.61504	0.449	0.207	1
DHX15	7.73981e-05	0.617598	0.306	0.109	1
NAALAD2	7.84373e-05	0.391061	0.102	0.017	1
TFE3	7.84373e-05	0.39626	0.102	0.017	1
LMOD2	7.8959e-05	-0.798223	0.531	0.729	1
TECRL	7.98545e-05	-0.830017	0.592	0.78	1
ZNF641	7.989e-05	0.371781	0.102	0.017	1
MAST4	8.00542e-05	-0.803892	0.755	0.82	1
AL592183.1	8.07057e-05	0.458198	0.265	0.088	1
RFX3	8.13584e-05	0.706414	0.347	0.141	1
ATM	8.18887e-05	0.690033	0.388	0.173	1
LOXL2	8.22655e-05	0.770788	0.163	0.041	1
PXK	8.27904e-05	0.451157	0.245	0.076	1
MATN2	8.33631e-05	0.909561	0.184	0.05	1
GDI2	8.35116e-05	0.400655	0.265	0.087	1
FAM120C	8.35474e-05	0.301116	0.143	0.031	1
TNKS1BP1	8.36336e-05	0.42757	0.102	0.017	1
PRKD1	8.3688e-05	0.513721	0.327	0.124	1
ZC4H2	8.40592e-05	0.359572	0.265	0.086	1
OTUD7B	8.4163e-05	0.646879	0.286	0.103	1
RSU1	8.49362e-05	0.587541	0.49	0.231	1
TMEM178B	8.61192e-05	-0.677949	0.612	0.76	1
SIDT2	8.6551e-05	0.223302	0.143	0.031	1
MMP2	8.65518e-05	0.619981	0.408	0.176	1
PITPNC1	8.65647e-05	0.531083	0.408	0.174	1
GALNT7	8.76272e-05	0.393625	0.204	0.058	1
EMC1	8.89125e-05	0.390721	0.122	0.024	1
ANKRD13C	8.90381e-05	0.507113	0.327	0.123	1
TRIR	8.96564e-05	0.204577	0.143	0.031	1
ANKRD44	9.10401e-05	0.530227	0.347	0.137	1
CMTR2	9.13186e-05	0.348695	0.082	0.012	1
ERO1A	9.24156e-05	0.37546	0.143	0.032	1
ZNF506	9.27028e-05	0.337265	0.327	0.122	1
CTSL	9.33061e-05	0.244817	0.102	0.017	1
RTN3	9.37976e-05	0.544031	0.449	0.198	1
FLNC	9.40355e-05	-1.19849	0.224	0.475	1
SPSB4	9.42112e-05	0.52558	0.224	0.068	1
DOCK1	9.44199e-05	0.619289	0.633	0.326	1
YTHDC2	9.51112e-05	0.531017	0.388	0.16	1
FKBP14	9.53621e-05	0.365748	0.082	0.012	1
GRINA	9.58842e-05	0.353273	0.102	0.017	1
TPGS2	9.85296e-05	0.266161	0.102	0.017	1
SRP72	9.92048e-05	0.615386	0.184	0.051	1
FAM104A	0.000100025	0.261376	0.122	0.024	1
TNNC1	0.000100089	-1.32135	0.163	0.406	1
PALM2-AKAP2	0.00010062	-0.824196	0.367	0.672	1
RNF144A	0.000100803	0.473329	0.306	0.114	1
ACTG1	0.000101964	0.674817	0.551	0.283	1
CCDC8	0.000102848	0.349171	0.082	0.012	1
NBEAL1	0.000103696	0.596056	0.592	0.315	1
CDR2L	0.000103961	0.374547	0.082	0.012	1
ERLIN2	0.000104028	0.147975	0.102	0.017	1
FERMT2	0.000105608	0.712261	0.449	0.214	1
FMO1	0.000106223	0.363659	0.082	0.012	1
ZNF280D	0.000106504	0.7197	0.49	0.251	1
SETX	0.000107339	0.528312	0.449	0.199	1
YIPF5	0.000107371	0.329068	0.082	0.012	1
BRWD3	0.000108294	0.438261	0.224	0.068	1
ACVR1B	0.000110474	0.371094	0.163	0.041	1
PAPPA	0.000110809	0.148939	0.102	0.017	1
WDFY3	0.000110931	0.723896	0.571	0.299	1
CCNT1	0.000111481	0.304884	0.204	0.058	1
LINC01358	0.000112081	0.38966	0.082	0.012	1
NCKAP1	0.000112104	0.53335	0.592	0.294	1
ZNF251	0.000113578	0.395873	0.204	0.059	1
GALNT17	0.000113951	-0.817114	0.633	0.808	1
DNAJC1	0.00011433	0.54754	0.531	0.26	1
ASB13	0.000114509	0.197301	0.082	0.012	1
EFR3A	0.000114763	0.670786	0.388	0.169	1
PDE3A	0.000114808	-0.558577	0.959	0.962	1
AL354733.3	0.000115741	0.219224	0.082	0.012	1
MTDH	0.000116459	0.543291	0.531	0.258	1
STAT5B	0.000116611	0.502684	0.265	0.092	1
PGAP1	0.000116669	0.703092	0.184	0.052	1
FRMD4A	0.000117529	0.721887	0.612	0.324	1
MRPL30	0.000118243	0.261659	0.082	0.012	1
PRDX1	0.000119228	0.293307	0.143	0.032	1
NDUFAF7	0.000119514	0.152893	0.082	0.012	1
ADAMTS5	0.000119514	0.225523	0.082	0.012	1
APLF	0.000121923	0.351622	0.224	0.068	1
STK19	0.000122093	0.134964	0.082	0.012	1
SAMD9	0.000122093	0.134217	0.082	0.012	1
UGGT2	0.000122663	0.635086	0.408	0.178	1
COASY	0.000123402	0.120541	0.082	0.012	1
ZEB1-AS1	0.000125227	0.818102	0.143	0.034	1
MBD5	0.00012728	0.652948	0.816	0.552	1
CLMN	0.000127899	0.333879	0.184	0.05	1
ZKSCAN1	0.000129614	0.553243	0.306	0.115	1
C6orf89	0.00013026	0.450607	0.265	0.09	1
DNAJC9	0.000130573	0.674043	0.184	0.053	1
MCU	0.000130701	0.621061	0.429	0.192	1
PHLPP1	0.000132025	0.707826	0.347	0.145	1
MUSK	0.000132584	0.423011	0.122	0.025	1
LYST	0.00013483	0.466617	0.347	0.138	1
TACC1	0.000135229	0.682061	0.469	0.228	1
SP110	0.000135626	0.44362	0.122	0.025	1
ARL5A	0.000135665	0.460213	0.245	0.082	1
KDSR	0.000136529	0.552068	0.265	0.093	1
CHRM2	0.000137539	-0.744309	0.653	0.831	1
NFASC	0.000137872	0.370867	0.204	0.059	1
HELZ2	0.000138396	0.401725	0.102	0.019	1
SLF2	0.000138477	0.442646	0.347	0.137	1
DSTN	0.000139164	0.516117	0.408	0.177	1
AL050309.1	0.000139492	0.57826	0.204	0.061	1
UBE2Q2	0.000139724	0.417405	0.184	0.051	1
FNDC1	0.000141281	0.46217	0.143	0.034	1
RAB22A	0.000142211	0.346237	0.204	0.06	1
TMEM220	0.000143115	0.258013	0.184	0.05	1
ZC3HAV1	0.000143189	0.568657	0.184	0.052	1
VCP	0.000143439	0.627836	0.367	0.158	1
RCOR1	0.000143581	0.486363	0.408	0.171	1
ANKRD6	0.000144294	0.614789	0.327	0.127	1
YWHAZ	0.000144315	0.631613	0.633	0.373	1
NCOA1	0.000144492	0.643394	0.694	0.466	1
PABPC1	0.000145832	0.46465	0.408	0.176	1
RAVER2	0.00014898	0.473814	0.286	0.104	1
HMGB2	0.000149616	0.400848	0.102	0.019	1
TMEM87A	0.000151169	0.58321	0.286	0.107	1
ZNF706	0.000151676	0.656552	0.245	0.085	1
AP002026.1	0.000153543	0.615674	0.102	0.019	1
SART1	0.000153543	0.301742	0.102	0.019	1
MRPL3	0.00015361	0.422014	0.163	0.043	1
GLS	0.000156015	0.692636	0.408	0.184	1
BBS9	0.000157001	0.717407	0.653	0.377	1
TCF12	0.000158408	0.611253	0.755	0.513	1
RAPH1	0.000158666	0.489912	0.224	0.072	1
TBC1D2B	0.000158729	0.331655	0.163	0.042	1
DISP1	0.000159182	0.246666	0.245	0.079	1
CAB39L	0.000159248	0.699331	0.265	0.095	1
HMGCLL1	0.000163658	0.297115	0.122	0.025	1
NUP93	0.000164151	0.635219	0.184	0.053	1
ARL8A	0.000165202	0.311369	0.102	0.019	1
OAT	0.000165913	0.253753	0.102	0.019	1
CPS1	0.000167344	0.275684	0.102	0.019	1
TET2	0.000168089	0.584422	0.429	0.192	1
RECQL	0.000168891	0.411424	0.204	0.061	1
COL14A1	0.000169978	0.485257	0.163	0.043	1
ODF2L	0.000172586	0.544495	0.204	0.064	1
ARL3	0.000174708	0.305254	0.143	0.034	1
IQGAP1	0.000175727	0.584949	0.449	0.213	1
LINC01133	0.000176015	0.35627	0.061	0.007	1
CHD1	0.0001765	0.304331	0.449	0.197	1
CERS6	0.000176631	-0.884957	0.51	0.665	1
OSBPL5	0.000178196	0.49347	0.184	0.052	1
CCDC90B	0.000178206	0.50307	0.143	0.035	1
ADAMTSL2	0.000179217	0.257089	0.102	0.019	1
FUT8	0.000179246	0.700329	0.327	0.131	1
WASF1	0.000180644	0.251884	0.061	0.007	1
TTC28	0.000181309	0.649368	0.735	0.458	1
ATP2B1	0.000182926	0.333544	0.286	0.103	1
LINC01933	0.000185387	0.238197	0.061	0.007	1
AKR1C2	0.000185387	0.201274	0.061	0.007	1
SIMC1	0.000185769	0.383568	0.163	0.043	1
NAP1L1	0.000186042	0.622583	0.49	0.249	1
FEZ2	0.000186828	0.427572	0.184	0.053	1
UCK1	0.000187802	0.3126	0.061	0.007	1
UBE2Z	0.000189149	0.436499	0.184	0.052	1
PALLD	0.000190578	-0.530567	0.898	0.972	1
NCAM1	0.000191379	-0.791223	0.51	0.723	1
TTC37	0.00019153	0.636524	0.327	0.133	1
LINC02193	0.000192722	0.207055	0.061	0.007	1
REM1	0.000192722	0.217991	0.061	0.007	1
PRRC2A	0.000194981	0.396692	0.245	0.082	1
PGM3	0.000195219	0.447926	0.122	0.027	1
SLC5A6	0.000195227	0.151629	0.061	0.007	1
WDR91	0.000195227	0.152951	0.061	0.007	1
TCF7L2	0.0001958	0.554281	0.571	0.295	1
PHF14	0.000197334	0.634997	0.408	0.183	1
CHRAC1	0.000197762	0.121513	0.061	0.007	1
CCDC34	0.000197762	0.145756	0.061	0.007	1
C14orf119	0.000197762	0.148453	0.061	0.007	1
TNPO1	0.000199838	0.629907	0.367	0.159	1
AADAT	0.000200328	0.108328	0.061	0.007	1
AC010198.1	0.000200328	0.141222	0.061	0.007	1
TRPM1	0.000200328	0.178673	0.061	0.007	1
INSYN2B	0.000202926	0.227943	0.061	0.007	1
RNF145	0.000203938	0.374069	0.306	0.116	1
GPX4	0.000204006	0.400067	0.184	0.052	1
TAGLN2	0.000204056	0.361992	0.245	0.081	1
KDM6A	0.000204264	0.552864	0.735	0.443	1
RASSF5	0.000205307	0.42606	0.082	0.013	1
CNOT2	0.000206275	0.559926	0.449	0.212	1
CEBPZ	0.000207627	0.410016	0.204	0.063	1
TAF10	0.000209453	0.417605	0.082	0.013	1
RPL29	0.000209808	0.346699	0.224	0.071	1
POLK	0.000211414	0.370725	0.306	0.117	1
DSCAML1	0.000211839	0.369123	0.184	0.052	1
ARL13B	0.000214973	0.446725	0.204	0.063	1
C15orf41	0.000215434	-0.715451	0.694	0.855	1
RBMS1	0.000218725	0.565053	0.857	0.629	1
PANK2	0.00021975	0.490609	0.163	0.044	1
STAM2	0.000220125	0.430853	0.245	0.083	1
CCDC200	0.000220163	0.432562	0.082	0.013	1
SCAND1	0.000220163	0.332847	0.082	0.013	1
ACOT11	0.000221029	-0.762321	0.612	0.737	1
GDI1	0.000222401	0.391731	0.122	0.027	1
TWSG1	0.000224179	0.341456	0.163	0.043	1
CBLB	0.000225539	0.697468	0.878	0.667	1
SPAG9	0.000225801	0.548007	0.612	0.333	1
UBA6	0.000225936	0.223756	0.245	0.081	1
SEC31A	0.000226828	0.692156	0.449	0.229	1
GABBR1	0.000227141	0.363441	0.184	0.052	1
RFX7	0.000227187	0.738821	0.347	0.153	1
AC008050.1	0.000227731	0.397934	0.143	0.035	1
ACADL	0.000229099	0.270009	0.082	0.013	1
SLC6A1	0.000229099	0.240605	0.082	0.013	1
Z95331.1	0.000229099	0.343604	0.082	0.013	1
ATG12	0.000230817	0.423826	0.184	0.052	1
RSBN1	0.000232688	0.560643	0.204	0.065	1
AC079380.1	0.000236024	0.473318	0.082	0.013	1
ILK	0.000236162	0.364235	0.204	0.063	1
BIN1	0.000238375	0.278291	0.082	0.013	1
PON2	0.00023875	0.425742	0.184	0.053	1
ULK2	0.00023962	0.430645	0.163	0.044	1
NIBAN1	0.000239777	-0.802105	0.694	0.812	1
SAMD4A	0.000240375	-0.48014	0.816	0.914	1
ATP5MF	0.000242455	0.300091	0.122	0.027	1
LMNA	0.000244282	0.965799	0.449	0.243	1
CNTNAP1	0.000245562	0.17098	0.082	0.013	1
CRYAB	0.000246071	-1.01798	0.163	0.406	1
TBC1D5	0.000246555	0.594371	0.816	0.571	1
ARMCX4	0.000246596	0.544557	0.286	0.109	1
RPS25	0.000247275	0.322908	0.245	0.081	1
DNTTIP2	0.000248003	0.219457	0.082	0.013	1
ALPK1	0.00024803	0.461203	0.163	0.044	1
RPL13	0.00024843	0.505878	0.531	0.282	1
PROCR	0.000249742	0.534191	0.102	0.02	1
IRS1	0.000250298	0.452015	0.327	0.131	1
CYP4B1	0.000250466	0.227603	0.082	0.013	1
DUSP16	0.00025092	0.517578	0.388	0.173	1
GNL3	0.000252227	0.261885	0.143	0.035	1
ZDHHC17	0.000254044	0.39027	0.347	0.14	1
RUSC1	0.000257994	0.175844	0.082	0.013	1
CST3	0.000259869	0.718124	0.429	0.207	1
GNAI3	0.000262248	0.483287	0.367	0.162	1
DCAF10	0.000262467	0.574778	0.367	0.159	1
ENPP2	0.00026313	0.147056	0.082	0.013	1
SFT2D2	0.000263703	0.399705	0.143	0.035	1
TMSB4X	0.000265285	0.580746	0.367	0.156	1
MMS19	0.00026588	0.345784	0.224	0.073	1
RPE	0.000267071	0.232854	0.143	0.035	1
C5orf24	0.000267211	0.457747	0.163	0.044	1
CCNK	0.000267211	0.284127	0.163	0.044	1
PAM	0.000267774	-0.640216	0.837	0.834	1
CCN1	0.000268916	1.15393	0.469	0.255	1
DENND4A	0.000269951	0.660997	0.429	0.213	1
TCF25	0.00027246	0.532388	0.367	0.16	1
SPATS2	0.000272889	0.340662	0.347	0.139	1
MYCBP2-AS1	0.00027322	0.254407	0.102	0.02	1
ARHGEF2	0.000273281	0.314397	0.224	0.073	1
SKI	0.000273378	0.42996	0.367	0.154	1
PPIL3	0.000273691	0.120183	0.082	0.013	1
RPL18	0.000275717	0.453384	0.224	0.075	1
RANBP2	0.000276218	0.448609	0.327	0.132	1
ZC3H15	0.000276994	0.449815	0.204	0.065	1
BMP1	0.000279691	0.153701	0.122	0.027	1
AKAP13	0.000281543	-0.445762	0.959	0.962	1
DUBR	0.00028163	0.594764	0.224	0.076	1
ISLR	0.00028226	0.305449	0.102	0.02	1
FRMD8	0.000283696	0.171708	0.122	0.027	1
VPS36	0.000284381	0.373579	0.245	0.085	1
RADIL	0.000284563	0.282361	0.102	0.02	1
STXBP5	0.00028491	0.502146	0.449	0.216	1
WASF3	0.000292728	0.318825	0.163	0.044	1
PHF1	0.000293953	0.19294	0.102	0.02	1
HP1BP3	0.000297736	0.504892	0.469	0.228	1
EGLN2	0.000298756	0.189898	0.102	0.02	1
ZCCHC9	0.000304647	0.29484	0.122	0.028	1
ZNF384	0.000306099	0.212081	0.102	0.02	1
CASQ2	0.000307395	-0.832501	0.49	0.667	1
SNX14	0.000308234	0.590979	0.367	0.166	1
ANKRD10	0.000309066	0.577662	0.306	0.127	1
SMG7	0.000309733	0.59727	0.367	0.166	1
SEC24B-AS1	0.000311088	0.237961	0.102	0.02	1
RNF8	0.000311088	0.143668	0.102	0.02	1
ARID4B	0.000311248	0.54869	0.531	0.286	1
ADGRE5	0.000315481	0.330518	0.143	0.036	1
SEMA6D	0.000316454	0.585348	0.286	0.111	1
BCL7C	0.000316795	0.489339	0.204	0.065	1
TMEM135	0.000318822	0.518155	0.429	0.194	1
MRPS28	0.000319093	0.598337	0.327	0.139	1
AC007038.1	0.000321397	0.296847	0.143	0.036	1
COLGALT2	0.000321557	0.367999	0.163	0.045	1
RBBP8	0.000322055	0.381058	0.122	0.028	1
RARS2	0.000322628	0.625503	0.286	0.115	1
TVP23C	0.000323121	0.29393	0.224	0.074	1
RB1	0.000323653	0.493103	0.49	0.234	1
TBCK	0.000325564	0.532103	0.51	0.261	1
TMEM50B	0.000326487	0.485664	0.265	0.094	1
SETD5	0.000326747	0.643063	0.612	0.345	1
ARHGAP24	0.000327159	0.62141	0.776	0.521	1
PTPRM	0.000328395	-0.511266	0.837	0.905	1
PHF10	0.000329446	0.25507	0.143	0.036	1
STK3	0.000338926	0.662809	0.612	0.368	1
FTH1	0.000338942	0.412747	0.388	0.167	1
ZNF708	0.000341028	0.222224	0.163	0.044	1
TANC2	0.000343233	0.59669	0.224	0.079	1
WARS2-AS1	0.000344271	0.736046	0.388	0.185	1
SERBP1	0.000346448	0.374784	0.286	0.109	1
HIVEP2	0.000346537	0.790985	0.612	0.358	1
ZFPM2-AS1	0.000348436	0.37814	0.204	0.065	1
CDC27	0.000348758	0.504081	0.367	0.163	1
AC109927.1	0.00034992	0.288572	0.122	0.028	1
NFE2L2	0.00035009	0.508597	0.49	0.254	1
TLE4	0.000350876	0.672332	0.265	0.102	1
OAF	0.000354193	0.49656	0.143	0.037	1
Z83843.1	0.000360112	0.52337	0.204	0.067	1
LTA4H	0.000362183	0.240954	0.122	0.028	1
SLC25A25	0.000363568	0.277138	0.143	0.036	1
SLCO2B1	0.000368058	0.257693	0.143	0.036	1
ZNF432	0.000369732	0.196146	0.122	0.028	1
DPY19L3	0.0003726	0.304623	0.143	0.036	1
AC079447.1	0.000373568	0.44231	0.327	0.133	1
TBPL1	0.000374664	0.466871	0.102	0.021	1
CES1	0.000374847	0.280317	0.122	0.028	1
LRRC2	0.000375899	-1.1285	0.306	0.498	1
APOD	0.000386053	1.00389	0.51	0.258	1
ERLEC1	0.000386312	0.344614	0.163	0.045	1
RAB3GAP2	0.000387712	0.384798	0.347	0.145	1
ETNK1	0.000389589	0.371172	0.286	0.109	1
RCAN2	0.000394693	-0.569826	0.816	0.857	1
NR2C1	0.00039619	0.379106	0.224	0.076	1
NR4A1	0.000402171	0.479775	0.878	0.766	1
SAMD12	0.000406663	-1.15568	0.184	0.409	1
MFN1	0.000407075	0.587025	0.245	0.092	1
GPM6A	0.000408167	-1.13769	0.122	0.358	1
SNRNP40	0.000408223	0.193234	0.163	0.045	1
TBC1D10A	0.000409356	0.631646	0.082	0.014	1
GARS-DT	0.000409828	0.367132	0.408	0.182	1
ANKAR	0.000411557	0.50963	0.265	0.102	1
VTI1B	0.000411864	0.471064	0.184	0.057	1
ZRANB2	0.000411925	0.55202	0.388	0.182	1
CCDC14	0.000412186	0.360275	0.224	0.078	1
DDB1	0.000412186	0.409259	0.224	0.078	1
MTCH1	0.000413141	0.52196	0.327	0.138	1
RASA3	0.000414529	0.363313	0.184	0.056	1
FAR2	0.000414571	0.386812	0.102	0.021	1
SF3B1	0.000416406	0.501627	0.327	0.131	1
AP1G1	0.000418065	0.414436	0.347	0.149	1
NUS1	0.000418066	0.398474	0.184	0.057	1
STRAP	0.000422249	0.40584	0.184	0.057	1
DHX40	0.000428757	0.29519	0.082	0.014	1
RASSF8	0.000428813	0.805454	0.306	0.123	1
CMSS1	0.00043346	0.591707	0.449	0.227	1
GTF2F2	0.000434061	0.508666	0.367	0.167	1
DNAJA1	0.000434177	0.281225	0.265	0.096	1
PKDCC	0.000435035	0.462076	0.184	0.057	1
ERAP2	0.000436756	0.285421	0.082	0.014	1
LMO7	0.000437773	-0.746047	0.531	0.696	1
AKNA	0.000447932	0.338795	0.102	0.021	1
MARK3	0.000448039	0.404631	0.755	0.438	1
AMMECR1	0.00044806	0.245638	0.143	0.037	1
TAF1C	0.000449015	0.331626	0.082	0.014	1
CHIC2	0.000449662	0.355773	0.224	0.076	1
NBL1	0.000451403	0.378482	0.102	0.021	1
RWDD4	0.000457365	0.333376	0.082	0.014	1
SNED1	0.000458233	0.820018	0.286	0.116	1
DDX56	0.000458416	0.326564	0.122	0.029	1
RNF13	0.000458853	0.45706	0.388	0.174	1
CEBPD	0.000460425	0.530923	0.163	0.048	1
SEPTIN7	0.000461137	0.40964	0.408	0.191	1
RPS13	0.000465144	0.187264	0.224	0.074	1
PAPOLA	0.000465997	0.384817	0.51	0.247	1
RIPK1	0.000468497	0.257576	0.204	0.065	1
PHLPP2	0.000469365	0.538211	0.143	0.038	1
MYO18B	0.000470597	-0.70916	0.653	0.815	1
MYOM3	0.000472149	-0.827817	0.551	0.713	1
CLK1	0.000474576	0.345997	0.429	0.197	1
SPTLC3	0.00047493	0.597782	0.204	0.068	1
PANX1	0.000478879	0.204595	0.082	0.014	1
EIF3I	0.000480084	0.224098	0.102	0.021	1
PXN-AS1	0.000483294	0.180135	0.082	0.014	1
BBS7	0.000487746	0.198416	0.082	0.014	1
RARRES2	0.000487746	0.257793	0.082	0.014	1
NNMT	0.000487746	0.229568	0.082	0.014	1
ARHGDIB	0.00049322	0.357617	0.122	0.029	1
ZNF783	0.000495172	0.212863	0.061	0.008	1
AC004889.1	0.000496766	0.175841	0.082	0.014	1
S100A10	0.000498564	0.509593	0.163	0.049	1
ABCC4	0.000499807	0.379884	0.122	0.029	1
BCL2	0.000500411	0.504754	0.51	0.264	1
C3orf70	0.000501334	0.213717	0.082	0.014	1
TTC17	0.000501494	0.393175	0.633	0.352	1
AZI2	0.000502086	0.343837	0.184	0.057	1
EXOSC9	0.000506731	0.258427	0.061	0.008	1
LINC01341	0.000512604	0.143058	0.061	0.008	1
POU2F1	0.000513875	0.549902	0.449	0.228	1
RPS9	0.00051689	0.309725	0.306	0.121	1
OLFML1	0.000518541	0.32711	0.061	0.008	1
CHRNB1	0.000518541	0.202632	0.061	0.008	1
HEMK1	0.000520001	0.0929195	0.082	0.014	1
HIC1	0.000523512	0.283887	0.122	0.029	1
SERTAD4	0.000524542	0.215042	0.061	0.008	1
DOCK9	0.000526696	0.620325	0.429	0.214	1
TMEM179B	0.000529575	0.134673	0.082	0.014	1
ZBTB20-AS1	0.000530607	0.196573	0.061	0.008	1
KMT2E-AS1	0.000530607	0.300703	0.061	0.008	1
TVP23A	0.000530607	0.26066	0.061	0.008	1
RNF152	0.000532784	0.550751	0.265	0.103	1
RPS6KA6	0.000536738	0.217452	0.061	0.008	1
SERTAD1	0.000538495	0.129085	0.102	0.021	1
RBM15B	0.000542934	0.177673	0.061	0.008	1
AC087477.2	0.000542934	0.173704	0.061	0.008	1
VWA1	0.000549197	0.177222	0.061	0.008	1
CFI	0.000549197	0.162106	0.061	0.008	1
TYRO3	0.000549197	0.199455	0.061	0.008	1
NFKBIB	0.000549197	0.150752	0.061	0.008	1
PHF21B	0.000549197	0.164373	0.061	0.008	1
EFHD1	0.000550643	0.598665	0.184	0.059	1
DUSP6	0.000551886	0.270903	0.122	0.029	1
BCAT1	0.000555528	0.178529	0.061	0.008	1
SMIM41	0.000555528	0.192941	0.061	0.008	1
PXDC1	0.000555531	0.228243	0.122	0.029	1
KIAA1586	0.000561926	0.113687	0.061	0.008	1
JRKL	0.000561926	0.188187	0.061	0.008	1
THAP2	0.000561926	0.117288	0.061	0.008	1
DDAH2	0.00056289	0.213225	0.122	0.029	1
OLFML3	0.000568393	0.0929851	0.061	0.008	1
SLC26A2	0.000568393	0.086857	0.061	0.008	1
ARHGAP25	0.000569362	0.439649	0.143	0.038	1
YY1	0.00057033	0.532569	0.286	0.116	1
TIAL1	0.000571779	0.444681	0.204	0.068	1
MIR4713HG	0.000574929	0.0892518	0.061	0.008	1
ZKSCAN2-DT	0.000574929	0.178904	0.061	0.008	1
TRAPPC2L	0.000574929	0.0537646	0.061	0.008	1
NPAS3	0.000577071	0.589795	0.49	0.255	1
KLF3	0.0005815	0.361949	0.184	0.057	1
FAM66C	0.000585814	0.360327	0.102	0.022	1
DDR2	0.000587254	0.465047	0.408	0.195	1
SAP25	0.000588212	0.0710315	0.061	0.008	1
PIWIL2	0.000588212	0.0610353	0.061	0.008	1
UBR2	0.000594103	0.412695	0.592	0.319	1
DDX21	0.000597229	0.319715	0.163	0.048	1
TMBIM1	0.000599892	0.337464	0.143	0.038	1
GLRX3	0.000600837	0.365861	0.245	0.089	1
CASK	0.000602912	0.496964	0.367	0.165	1
RECK	0.000604433	0.670696	0.204	0.071	1
RFC3	0.000604679	0.65828	0.347	0.154	1
JMJD1C	0.000607661	0.546891	0.857	0.651	1
TASOR	0.000609405	0.500487	0.286	0.116	1
TNFRSF19	0.000613745	0.53982	0.388	0.184	1
ARFGEF1	0.00061701	0.417891	0.571	0.314	1
OBSCN	0.000626037	-0.662295	0.551	0.751	1
FLT1	0.000631785	-1.01273	0.061	0.287	1
ZNF585A	0.000631941	0.340665	0.143	0.038	1
LRCH3	0.000632096	0.436182	0.531	0.278	1
THUMPD1	0.000635523	0.353641	0.102	0.022	1
EEF1A1	0.000638073	0.555738	0.408	0.199	1
SEPTIN2	0.000644068	0.433489	0.388	0.178	1
ATL2	0.000647448	0.270893	0.327	0.133	1
HBA2	0.000647919	0.514754	0.184	0.059	1
ADD3	0.000648589	0.668223	0.612	0.409	1
ZNF546	0.000649746	0.254989	0.102	0.022	1
VCPIP1	0.000650426	0.272365	0.143	0.038	1
MYO1D	0.000651246	0.873158	0.327	0.149	1
FHL2	0.000653219	-0.844268	0.776	0.845	1
KIF16B	0.000653948	0.431093	0.367	0.166	1
SGCE	0.000654823	0.288924	0.122	0.03	1
NFXL1	0.000661758	0.19272	0.143	0.038	1
RBL2	0.000673021	0.317029	0.184	0.059	1
RBM45	0.00067411	0.364687	0.102	0.022	1
LAPTM4A	0.000679613	0.249328	0.224	0.078	1
AC090825.1	0.000686843	0.386074	0.286	0.115	1
FRY	0.000690212	-0.580746	0.796	0.839	1
HAT1	0.000692201	0.241706	0.184	0.057	1
TMEM263	0.000692599	0.359155	0.163	0.049	1
NSF	0.00069513	0.26558	0.163	0.048	1
CAMSAP2	0.000700774	0.714059	0.388	0.192	1
ARMC1	0.000703412	0.667261	0.163	0.05	1
MLIP	0.000703685	-0.5456	0.857	0.877	1
ABCE1	0.000704897	0.284112	0.143	0.038	1
PSMA4	0.000708868	0.16376	0.245	0.087	1
CERS2	0.00070965	0.233597	0.102	0.022	1
PSMA3-AS1	0.000713289	0.43023	0.245	0.094	1
DDX59	0.000716094	0.251463	0.122	0.03	1
NIPBL	0.000720424	0.52513	0.694	0.423	1
DEAF1	0.000723222	0.289339	0.265	0.101	1
FGF7	0.00072554	0.437512	0.224	0.08	1
YTHDC1	0.000726609	0.412098	0.388	0.178	1
TXLNA	0.00073157	0.354744	0.143	0.039	1
CAP1	0.000736307	0.311883	0.184	0.059	1
MT-ND4L	0.000750178	-0.689249	0.735	0.84	1
ADNP	0.000750857	0.46494	0.449	0.224	1
DGKH	0.000756788	0.618432	0.327	0.144	1
SLIT3	0.000758151	0.700742	0.306	0.131	1
ZMYM6	0.000770261	0.326884	0.224	0.08	1
GLTP	0.000772808	0.238966	0.122	0.03	1
DHX9	0.00078021	0.272368	0.224	0.079	1
IQCE	0.000780311	0.20017	0.102	0.022	1
AL627171.2	0.000782708	0.685419	0.429	0.206	1
SUMO1	0.000782727	0.327051	0.143	0.039	1
PIK3CA	0.000785559	0.659699	0.265	0.107	1
ACER2	0.000785733	0.468326	0.082	0.015	1
CSRNP1	0.000786008	0.234246	0.102	0.022	1
CHKB	0.000792621	0.190269	0.122	0.03	1
ACBD3	0.000797736	0.291289	0.286	0.112	1
MTERF1	0.000801889	0.434418	0.245	0.092	1
RPRD1A	0.000807818	0.37786	0.265	0.103	1
INSIG2	0.000809186	0.132899	0.102	0.022	1
MRI1	0.000813226	0.209056	0.082	0.015	1
WDFY2	0.000816677	0.474239	0.327	0.143	1
SOS1	0.000817637	0.593951	0.531	0.302	1
LINC00535	0.000819146	0.431315	0.163	0.05	1
RPS20	0.000825007	0.308472	0.265	0.102	1
CTNNB1	0.000827813	0.629174	0.531	0.297	1
EIF3J-DT	0.000834429	0.233132	0.082	0.015	1
FUT11	0.000837189	0.287308	0.143	0.039	1
MGAT5	0.000845458	-0.717782	0.551	0.722	1
IFT80	0.000847156	0.51531	0.184	0.06	1
ARL15	0.000855157	0.581238	0.776	0.581	1
AC097662.1	0.000856143	0.160461	0.082	0.015	1
MIR34AHG	0.000870909	0.19069	0.082	0.015	1
TOP3B	0.000870909	0.167087	0.082	0.015	1
YIPF6	0.000875697	0.248521	0.184	0.059	1
EDC4	0.00087838	0.273557	0.082	0.015	1
TSNARE1	0.000878994	0.420154	0.163	0.05	1
NR2F2	0.000882581	0.133037	0.102	0.022	1
RNF11	0.000885646	0.369077	0.265	0.105	1
KIF13B	0.00088641	0.724404	0.327	0.148	1
CLDND1	0.000887867	0.358137	0.163	0.05	1
EDEM3	0.000890632	0.51503	0.224	0.085	1
APP	0.000894691	0.810582	0.551	0.353	1
CAPN2	0.000899887	0.341152	0.224	0.08	1
SHOC2	0.000902199	0.794374	0.367	0.178	1
MAP2K7	0.000903673	0.446765	0.143	0.041	1
CYFIP1	0.000905092	0.326187	0.265	0.105	1
AC008591.1	0.000908864	0.205598	0.082	0.015	1
SHFL	0.000908864	0.135439	0.082	0.015	1
BLZF1	0.000909364	0.422546	0.122	0.031	1
MVP	0.000914989	0.296169	0.122	0.031	1
BCHE	0.000916636	0.117799	0.082	0.015	1
CBR4	0.0009178	0.654398	0.286	0.124	1
RBM5	0.000920335	0.338304	0.367	0.166	1
TSPAN9	0.000921717	-0.811263	0.429	0.601	1
DPY19L2	0.00092184	-0.916727	0.286	0.476	1
COMMD4	0.00092841	0.146215	0.082	0.015	1
STAMBP	0.000932058	0.379999	0.122	0.031	1
NFKBIA	0.000943104	0.555914	0.143	0.042	1
AC007381.1	0.000948818	-1.10003	0.143	0.342	1
ZC3H18	0.000953259	0.38535	0.163	0.051	1
BCLAF1	0.000953713	0.430535	0.347	0.155	1
SCLY	0.000954916	0.307062	0.102	0.023	1
CNTLN	0.000956408	0.298803	0.224	0.08	1
RNF213	0.000961814	0.425898	0.286	0.121	1
KANSL1L	0.000983746	0.690734	0.49	0.277	1
GNAQ	0.000992513	0.526784	0.347	0.155	1
LANCL1	0.00100648	0.418439	0.163	0.051	1
PWWP3A	0.00100896	0.466768	0.163	0.051	1
TGS1	0.00100949	0.331754	0.122	0.031	1
KIAA1841	0.0010228	0.33112	0.224	0.082	1
KHDRBS1	0.00103656	0.68846	0.347	0.16	1
ERAP1	0.00103869	0.311145	0.102	0.023	1
IFNAR2	0.00103922	0.212734	0.184	0.059	1
AC006001.2	0.00104096	0.579763	0.265	0.109	1
TAF1B	0.00104779	0.544892	0.143	0.042	1
RIMKLB	0.00106101	0.270299	0.184	0.06	1
ANKRD12	0.0010638	0.449336	0.735	0.45	1
MT-ATP6	0.00106993	-0.31631	1	1	1
RAB3GAP1	0.00108828	0.546913	0.449	0.238	1
CDK8	0.00108958	0.57045	0.51	0.286	1
STAG1	0.00110813	0.592558	0.714	0.476	1
SPEF2	0.00110979	0.24052	0.102	0.023	1
SERF2	0.00111063	0.540448	0.265	0.11	1
PKN2	0.00111321	0.35673	0.51	0.258	1
UIMC1	0.00112249	0.415858	0.388	0.183	1
SETBP1	0.00112968	0.373367	0.388	0.177	1
EMC8	0.00113709	0.255118	0.102	0.023	1
PTPRA	0.00114125	0.441358	0.49	0.262	1
STUM	0.00114471	0.302834	0.061	0.009	1
ERCC1	0.00114589	0.329695	0.204	0.071	1
PWWP2A	0.00115392	0.294811	0.306	0.129	1
LOXL3	0.00115664	0.276996	0.061	0.009	1
TDRP	0.00115664	0.28503	0.061	0.009	1
AL356124.1	0.00115975	0.413603	0.122	0.032	1
THUMPD2	0.00116025	0.281708	0.163	0.051	1
IPO9-AS1	0.00116096	0.220225	0.143	0.041	1
AQR	0.00116755	0.319167	0.265	0.108	1
AC107204.1	0.00116869	0.221394	0.061	0.009	1
KATNAL1	0.00117499	0.425159	0.204	0.072	1
HECTD1	0.00117688	0.546404	0.429	0.219	1
SETD7	0.00117852	0.51953	0.184	0.061	1
PER3	0.0011815	0.409974	0.408	0.2	1
MFSD14A	0.00119298	0.182243	0.224	0.08	1
TRA2B	0.00119537	0.467045	0.469	0.246	1
MB21D2	0.00119798	0.406344	0.224	0.083	1
ZNF620	0.00120554	0.244551	0.061	0.009	1
PRR3	0.00120554	0.195898	0.061	0.009	1
ZNF451-AS1	0.00121805	0.192862	0.061	0.009	1
CTTNBP2NL	0.00123027	0.371932	0.204	0.072	1
SNHG14	0.00123582	-0.640699	0.694	0.773	1
NT5C3A	0.00123608	0.413174	0.224	0.083	1
THBS3	0.00123705	0.259228	0.061	0.009	1
GABRB2	0.00124345	0.322534	0.061	0.009	1
ATAT1	0.00124345	0.204489	0.061	0.009	1
RAB34	0.00124345	0.210411	0.061	0.009	1
GIT2	0.00124679	0.337762	0.306	0.13	1
RSPRY1	0.00124681	0.406493	0.204	0.073	1
NGDN	0.00125633	0.205664	0.061	0.009	1
SETMAR	0.00126933	0.129451	0.061	0.009	1
TRAF3IP2	0.00126933	0.143098	0.061	0.009	1
AC022872.1	0.00126933	0.148916	0.061	0.009	1
DNMBP	0.00127197	0.350305	0.204	0.072	1
ITM2B	0.00127265	0.635759	0.469	0.251	1
SELENBP1	0.00127557	0.335464	0.122	0.032	1
PTOV1	0.00127653	0.375173	0.143	0.042	1
BTN3A1	0.00128246	0.129382	0.061	0.009	1
AC105429.1	0.00128246	0.142887	0.061	0.009	1
CPD	0.00129533	0.351737	0.224	0.083	1
KCNA2	0.00129572	0.151934	0.061	0.009	1
ANKRA2	0.00129572	0.107959	0.061	0.009	1
PGGHG	0.00129572	0.126251	0.061	0.009	1
MFSD14B	0.00129734	0.254675	0.163	0.051	1
TAPBPL	0.00130345	0.339645	0.082	0.016	1
QSER1	0.0013056	0.683493	0.224	0.089	1
SCAMP2	0.00130608	0.300326	0.184	0.061	1
APBA3	0.0013091	0.174054	0.061	0.009	1
FAXDC2	0.00131187	0.385021	0.265	0.109	1
CD34	0.00131985	0.705731	0.184	0.064	1
FAM172A	0.00133216	0.692657	0.633	0.392	1
DUS4L	0.00135	0.083073	0.061	0.009	1
PRR5L	0.00135	0.0882929	0.061	0.009	1
MRGPRF	0.00135	0.0865223	0.061	0.009	1
SLC35F2	0.00135	0.0572836	0.061	0.009	1
AL442125.1	0.00135	0.0810118	0.061	0.009	1
MIR100HG	0.00135049	0.602906	0.388	0.189	1
ANXA4	0.00135983	0.313811	0.224	0.083	1
TMEM98	0.0013639	0.0838168	0.061	0.009	1
FAM151B	0.00136723	0.418922	0.102	0.024	1
MAP3K20	0.00136827	-0.672667	0.408	0.593	1
CUL5	0.00136839	0.610631	0.347	0.17	1
CBFA2T2	0.0013701	0.537523	0.51	0.289	1
NUTM2A-AS1	0.00138402	0.462084	0.347	0.162	1
ERBB4	0.00138876	-0.557936	0.673	0.797	1
RALA	0.00139355	0.30599	0.286	0.118	1
HNRNPDL	0.00139395	0.511051	0.286	0.124	1
AC022034.3	0.00139545	-0.897268	0.49	0.649	1
EVI5	0.00139697	0.611724	0.571	0.313	1
RHOBTB3	0.0013979	0.691089	0.449	0.253	1
PRICKLE1	0.00139832	0.413004	0.347	0.162	1
CPEB4	0.00140615	-0.6025	0.694	0.803	1
ACTR3	0.00140643	0.389977	0.265	0.11	1
BIN3	0.00141944	0.498959	0.143	0.043	1
AC083798.2	0.00142388	0.250735	0.082	0.016	1
GNPDA1	0.00142388	0.288869	0.082	0.016	1
MSN	0.00142765	0.751944	0.388	0.196	1
EXOC6B	0.00144092	-0.589175	0.735	0.8	1
JKAMP	0.00144685	0.151911	0.082	0.016	1
ETF1	0.00145057	0.526726	0.327	0.154	1
PARD3	0.00145256	0.540716	0.837	0.601	1
LINC01515	0.00145561	0.394404	0.265	0.11	1
ENOSF1	0.00145626	0.307386	0.327	0.144	1
LARP6	0.00146084	0.254827	0.122	0.032	1
HMCES	0.00146321	0.139529	0.163	0.051	1
CSAD	0.00146377	0.403608	0.204	0.075	1
POMT2	0.00148194	0.277617	0.082	0.016	1
COMT	0.00148472	0.473109	0.245	0.098	1
DZIP1	0.00149643	0.403843	0.102	0.024	1
ARMC8	0.00150237	0.309742	0.327	0.145	1
EXOC2	0.00150267	0.267485	0.367	0.173	1
SAAL1	0.0015165	0.267252	0.102	0.024	1
C1orf54	0.00152996	0.151765	0.082	0.016	1
PIBF1	0.00153035	0.435995	0.551	0.309	1
HDAC7	0.00153405	0.356276	0.224	0.086	1
STIP1	0.00154261	0.300863	0.163	0.052	1
STK4	0.00154388	0.359952	0.184	0.064	1
DCUN1D1	0.00154711	0.276704	0.265	0.107	1
ERGIC1	0.00155107	0.557362	0.327	0.149	1
FIG4	0.00155474	0.367444	0.122	0.034	1
MMAB	0.00155873	0.198057	0.143	0.042	1
KIAA2026	0.00156038	0.351868	0.347	0.162	1
ARID5B	0.00156076	0.519065	0.673	0.429	1
TMED5	0.00156084	0.326708	0.204	0.074	1
HNRNPH2	0.0015669	0.0903093	0.082	0.016	1
DOCK8	0.0015818	0.682249	0.122	0.034	1
ADAM22	0.00160014	0.341249	0.163	0.053	1
MAPK1	0.00160059	0.462892	0.449	0.227	1
TRIP12	0.00160733	0.298101	0.469	0.233	1
AFMID	0.00162434	0.260853	0.184	0.063	1
KCNN3	0.00162787	0.548116	0.122	0.034	1
MLYCD	0.00162933	0.40701	0.265	0.11	1
PPL	0.0016314	0.24559	0.102	0.024	1
NOL8	0.00163199	0.326311	0.143	0.043	1
KIAA1671	0.00165698	0.481794	0.204	0.076	1
ADRA1A	0.00166372	-0.87356	0.286	0.477	1
USP9X	0.00166648	0.437211	0.429	0.221	1
DTX2	0.00166948	0.0567525	0.082	0.016	1
LUM	0.00167124	0.667071	0.347	0.163	1
SDCCAG8	0.00167972	0.52445	0.633	0.368	1
LAMP1	0.00168353	0.479301	0.204	0.076	1
ATP10D	0.00168804	0.439578	0.204	0.078	1
MTRNR2L12	0.00170663	0.708285	0.898	0.713	1
PXDNL	0.00170732	-0.571125	0.837	0.884	1
SPARCL1	0.00170742	0.78801	0.592	0.393	1
MT-CYB	0.00170789	-0.421033	1	1	1
TXLNG	0.00170835	0.420425	0.184	0.065	1
TGFB1	0.00170862	0.17944	0.102	0.024	1
EIF3E	0.00170907	0.270382	0.286	0.119	1
ABI2	0.00171422	0.321129	0.429	0.212	1
NDE1	0.001719	0.246505	0.163	0.052	1
COBL	0.0017272	-0.929929	0.061	0.255	1
ETV1	0.00172867	0.402212	0.265	0.112	1
ITGA9	0.00173059	-0.721078	0.49	0.61	1
CUBN	0.0017313	0.183365	0.102	0.024	1
TAF11	0.0017336	0.27935	0.122	0.034	1
STK25	0.00174445	0.323529	0.143	0.043	1
EDRF1	0.00174841	0.248903	0.184	0.063	1
LETMD1	0.00175349	0.288931	0.122	0.034	1
PLBD2	0.00175628	0.370035	0.163	0.053	1
ERN1	0.00176351	0.428895	0.122	0.034	1
LZIC	0.00177022	0.0790888	0.122	0.032	1
FAM20C	0.00177139	0.270698	0.143	0.043	1
ARMCX5-GPRASP2	0.00177264	0.360838	0.163	0.053	1
AGO3	0.00178664	0.419663	0.531	0.294	1
RIPK2	0.0017892	0.163993	0.102	0.024	1
TMEM41B	0.00180383	0.44195	0.306	0.138	1
PRDM2	0.00180884	0.421889	0.388	0.187	1
DAP	0.00180931	0.434099	0.184	0.065	1
ENOX2	0.00182383	0.504721	0.286	0.127	1
NME7	0.00183367	0.542696	0.245	0.101	1
GALK2	0.00183534	0.411285	0.286	0.129	1
CAMK2G	0.00184761	0.504429	0.143	0.044	1
SPHKAP	0.00184924	-0.7341	0.531	0.671	1
SESN3	0.00185796	0.484231	0.102	0.025	1
ZC3H7A	0.00186618	0.484617	0.224	0.09	1
MAP3K7	0.00186703	0.359217	0.265	0.112	1
FUS	0.00186892	0.375805	0.388	0.192	1
ANKUB1	0.00187729	0.289924	0.122	0.034	1
AC009093.2	0.00189609	0.475788	0.122	0.035	1
ATF7	0.00189682	0.333577	0.388	0.188	1
SFPQ	0.00190061	0.502345	0.551	0.324	1
OPTN	0.00191173	0.754275	0.245	0.102	1
SH3YL1	0.00191233	0.524218	0.184	0.067	1
ZFY	0.00192325	-0.953949	0.02	0.199	1
RAI14	0.00192341	0.496222	0.143	0.044	1
ATP8B1	0.00192484	0.282123	0.367	0.17	1
UBP1	0.0019285	0.329636	0.204	0.075	1
ACAA1	0.0019312	0.148745	0.122	0.034	1
BRD9	0.00193143	0.213049	0.143	0.043	1
PRKCA	0.00193608	0.392199	0.469	0.242	1
C6orf62	0.00193768	0.493182	0.265	0.116	1
RPL10	0.00194356	0.667106	0.367	0.189	1
NUB1	0.00195448	0.297512	0.184	0.064	1
CCL2	0.00196061	0.856119	0.163	0.057	1
FAR1	0.00196608	0.178351	0.306	0.131	1
HIBCH	0.00197733	0.321611	0.367	0.171	1
2023-03-02	0.00198196	0.193448	0.224	0.085	1
DTNBP1	0.00198247	0.494094	0.204	0.078	1
NFKBIZ	0.00199872	0.635411	0.163	0.056	1
TTC7A	0.00202194	0.206858	0.184	0.064	1
RAD54L2	0.00202955	0.302545	0.286	0.123	1
PPM1L	0.00204004	-0.800982	0.429	0.585	1
MFGE8	0.00204313	0.545157	0.551	0.313	1
KDELR2	0.00204332	0.161382	0.122	0.034	1
NF1	0.00206991	0.46648	0.755	0.48	1
TSN	0.0020823	0.343406	0.082	0.017	1
PLOD1	0.00208434	0.0804628	0.184	0.063	1
CLSTN2	0.00208835	0.355238	0.184	0.065	1
ACTR6	0.0020981	0.247787	0.082	0.017	1
SARS	0.00212559	0.353089	0.143	0.044	1
POPDC2	0.00213077	-0.940995	0.082	0.267	1
CCNI	0.00215234	0.265648	0.367	0.17	1
TAP1	0.00215824	0.406505	0.061	0.01	1
FBXL7	0.00216193	0.444883	0.939	0.82	1
RBM33	0.00216517	0.447119	0.408	0.211	1
TRAF3IP2-AS1	0.00216998	0.465595	0.286	0.126	1
AC079848.2	0.00217877	0.33165	0.082	0.017	1
ACTR1B	0.00217978	0.208854	0.102	0.025	1
PIP4K2A	0.00218192	0.390872	0.265	0.112	1
LIMCH1	0.00218988	-0.593013	0.633	0.742	1
PNPLA6	0.002198	0.134907	0.122	0.034	1
MTA1	0.00220262	0.157877	0.184	0.063	1
SEPHS1	0.00221034	0.1376	0.122	0.034	1
PSPC1	0.00221257	0.482288	0.449	0.234	1
SUCO	0.00223052	0.469135	0.224	0.09	1
SMAD1	0.0022335	0.423473	0.204	0.076	1
EMC1-AS1	0.00223963	0.258088	0.122	0.035	1
ARPC4	0.00224998	0.30164	0.102	0.025	1
PTPN18	0.00226228	0.27931	0.082	0.017	1
POGLUT1	0.00226228	0.282657	0.082	0.017	1
LSM3	0.00226247	0.381199	0.061	0.01	1
PTGES3	0.0022749	0.327977	0.469	0.242	1
HSD17B11	0.00227933	0.31216	0.082	0.017	1
PAFAH1B2	0.00229446	0.306902	0.224	0.087	1
RTCA-AS1	0.0022965	0.217684	0.082	0.017	1
HS1BP3	0.00230763	0.254378	0.102	0.025	1
NPC1	0.00231093	0.301321	0.163	0.054	1
RFK	0.0023272	0.198457	0.061	0.01	1
SYNC	0.00233119	0.269719	0.082	0.017	1
CYS1	0.00233119	0.201086	0.082	0.017	1
ANGEL2	0.00233719	0.111025	0.122	0.034	1
UBN2	0.0023385	0.447028	0.388	0.196	1
AAMP	0.00234871	0.192372	0.082	0.017	1
FOXN2	0.00235283	0.329225	0.163	0.054	1
IL6R	0.00235764	0.239026	0.224	0.086	1
CERCAM	0.00236635	0.168233	0.082	0.017	1
FAM111A	0.00236635	0.259578	0.082	0.017	1
PYGL	0.00236635	0.18137	0.082	0.017	1
VASN	0.00237129	0.230783	0.061	0.01	1
PDE1C	0.00238028	-0.475736	0.816	0.885	1
SPAAR	0.00238159	0.232988	0.102	0.025	1
LINC01807	0.00238412	0.226723	0.082	0.017	1
DCTN5	0.00238835	0.456199	0.102	0.027	1
UVRAG	0.00239246	0.439665	0.469	0.247	1
PIWIL4	0.00239362	0.189337	0.061	0.01	1
G2E3	0.00239385	0.30323	0.143	0.044	1
CD38	0.00241614	0.367936	0.061	0.01	1
AC007325.4	0.00241614	0.282458	0.061	0.01	1
ELK4	0.00243425	0.445523	0.143	0.045	1
IRF9	0.00243886	0.157018	0.061	0.01	1
YJU2	0.00243886	0.261525	0.061	0.01	1
INSR	0.00243924	-0.537493	0.694	0.774	1
PSMA2	0.00244231	0.20686	0.102	0.025	1
WASF2	0.00245041	0.542344	0.347	0.173	1
LSAMP	0.00245431	0.827909	0.469	0.272	1
ADRM1	0.00245641	0.164534	0.082	0.017	1
LTBP2	0.00245876	0.316545	0.122	0.035	1
ZFC3H1	0.00246535	0.303118	0.388	0.19	1
INTU	0.00247918	0.416537	0.184	0.067	1
FKBP7	0.00248488	0.235531	0.061	0.01	1
AC073343.2	0.0024933	0.139692	0.082	0.017	1
MIGA1	0.00250895	0.380449	0.286	0.126	1
GMPS	0.00251622	0.254312	0.163	0.054	1
IMMP2L	0.00252041	0.470821	0.776	0.589	1
MCM3AP	0.0025215	0.317132	0.163	0.056	1
AC073114.1	0.00253169	0.171919	0.061	0.01	1
HDAC9	0.00253239	-0.917168	0.388	0.54	1
FBXO33	0.00253659	0.371864	0.204	0.079	1
CXCL12	0.00254141	0.526251	0.204	0.079	1
MTMR3	0.00254596	0.349642	0.388	0.195	1
CCDC141	0.00254869	-0.723833	0.449	0.598	1
LSM6	0.0025554	0.12289	0.061	0.01	1
PGM2L1	0.0025554	0.109647	0.061	0.01	1
ANAPC11	0.0025554	0.220926	0.061	0.01	1
NUCKS1	0.00255563	0.492718	0.551	0.308	1
PEX19	0.00256862	0.122112	0.082	0.017	1
JOSD2	0.00257931	0.121544	0.061	0.01	1
ZBTB7A	0.00258466	0.384681	0.347	0.165	1
EFNA5	0.00259123	-0.703246	0.592	0.745	1
ARID1B	0.00259594	0.474681	0.837	0.644	1
PPP3CB	0.0026011	0.416851	0.347	0.174	1
TBX15	0.00260343	0.17928	0.061	0.01	1
AL031599.1	0.00260343	0.1651	0.061	0.01	1
RAB33B	0.00260343	0.116757	0.061	0.01	1
RCN3	0.00260343	0.121595	0.061	0.01	1
CLDN12	0.00260386	0.239835	0.184	0.066	1
SPTBN1	0.00261647	0.415384	0.959	0.742	1
TGFB3	0.00262775	0.17772	0.061	0.01	1
LSM7	0.00262775	0.123688	0.061	0.01	1
RBM26	0.00264593	0.414359	0.408	0.216	1
PLK3	0.00265228	0.149759	0.061	0.01	1
PPIL6	0.00265228	0.113071	0.061	0.01	1
RNF126	0.00265228	0.100473	0.061	0.01	1
PARD3B	0.00265529	0.857475	0.735	0.519	1
MAN2C1	0.00265653	0.369692	0.184	0.067	1
HDGFL3	0.00267229	0.519643	0.163	0.057	1
DTD1	0.0026967	0.369321	0.204	0.078	1
MED13L	0.00270724	0.558738	0.714	0.492	1
ITGB3	0.00272713	0.0194465	0.061	0.01	1
TRHDE	0.00272713	0.0749956	0.061	0.01	1
PIK3IP1	0.00272713	0.126652	0.061	0.01	1
SMIM7	0.00272848	-0.000206416	0.184	0.063	1
WASHC4	0.00273284	0.351027	0.286	0.129	1
FBXL4	0.00273653	0.351749	0.327	0.152	1
KIRREL1	0.00275137	0.375739	0.102	0.027	1
ZNF37A	0.00276415	0.488152	0.224	0.092	1
USP47	0.00276467	0.534478	0.633	0.384	1
MKNK2	0.00278071	0.480396	0.286	0.132	1
ATAD3B	0.00281175	0.160864	0.163	0.054	1
CYP1B1	0.00281678	0.194475	0.122	0.035	1
AEBP2	0.00282952	0.574701	0.306	0.149	1
HCG17	0.00283111	0.324411	0.265	0.115	1
GAK	0.00284451	0.266099	0.224	0.09	1
RPL3	0.00284688	0.429769	0.184	0.068	1
DCP2	0.00285265	0.398754	0.163	0.057	1
MCRIP2	0.00287453	0.182533	0.163	0.054	1
STAT3	0.00289425	0.483324	0.531	0.319	1
ABCA1	0.00290576	0.378592	0.347	0.169	1
GNL2	0.0029095	0.178956	0.122	0.035	1
SPARC	0.00291383	0.458009	0.286	0.132	1
BBX	0.00293845	0.576956	0.49	0.287	1
EXTL2	0.00294223	0.311184	0.102	0.027	1
LRCH1	0.00295105	0.596198	0.367	0.184	1
PINK1	0.0029569	0.146199	0.122	0.035	1
PUM2	0.00295952	0.37689	0.449	0.242	1
PUS7L	0.0029782	0.271038	0.102	0.027	1
MYH10	0.00298041	0.390605	0.327	0.158	1
ATXN2L	0.00304116	0.34744	0.122	0.036	1
PACRGL	0.00304843	0.343664	0.143	0.046	1
RUNX2	0.00305135	0.402269	0.102	0.027	1
HIPK2	0.00306892	-0.731617	0.347	0.518	1
LTBR	0.00306989	0.256348	0.102	0.027	1
UBE4A	0.00307126	0.306743	0.245	0.103	1
ZNF426	0.00308854	0.237446	0.102	0.027	1
DLGAP4	0.00310522	0.358037	0.469	0.253	1
ZMYM5	0.00310657	0.305768	0.224	0.09	1
GMFB	0.0031075	0.271983	0.082	0.019	1
RCBTB2	0.00313733	0.336358	0.163	0.057	1
PHYKPL	0.00314603	0.367064	0.286	0.13	1
FMNL2	0.00316303	0.374137	0.327	0.154	1
SEPTIN11	0.00316445	0.415681	0.163	0.057	1
DDX17	0.00316472	0.399983	0.714	0.482	1
ANKS3	0.00317219	0.214607	0.143	0.045	1
GMDS	0.00317925	0.511683	0.347	0.173	1
FBXO38	0.00322064	0.370027	0.224	0.093	1
NCALD	0.00323027	0.498216	0.531	0.301	1
IL17RD	0.00324027	0.235667	0.122	0.036	1
MRTFA	0.00324957	0.535331	0.551	0.331	1
USP15	0.0032767	0.372653	0.531	0.299	1
IKBIP	0.00328075	0.244636	0.102	0.027	1
LINGO2	0.00328935	0.801693	0.082	0.019	1
FAM114A1	0.00330259	0.36927	0.143	0.046	1
PLD5	0.0033363	0.421531	0.082	0.019	1
ABCA5	0.00334621	0.410234	0.347	0.175	1
ATP2A2	0.00335873	-0.619721	0.653	0.729	1
CNOT3	0.00336063	0.188683	0.102	0.027	1
SEC24B	0.00336818	0.522837	0.347	0.174	1
JUNB	0.00336918	0.351837	0.347	0.165	1
WDR75	0.00338373	0.445328	0.143	0.048	1
AP3B1	0.00340286	0.608252	0.388	0.219	1
RPL28	0.00340402	0.289451	0.286	0.129	1
CWC27	0.00340883	0.426199	0.408	0.213	1
DPP9	0.00340999	0.208821	0.204	0.079	1
TPT1-AS1	0.00341215	0.252173	0.449	0.228	1
HNRNPK	0.00344463	0.453011	0.286	0.134	1
MTUS2	0.00345702	-0.696092	0.51	0.667	1
MKLN1	0.00345795	0.474035	0.673	0.438	1
C4orf3	0.00346298	0.162361	0.102	0.027	1
CYB5R3	0.00346766	0.240292	0.265	0.115	1
IGF2BP2	0.00347546	0.572081	0.286	0.132	1
PPIH	0.00348085	0.211272	0.082	0.019	1
NBPF1	0.00350098	0.306552	0.102	0.028	1
ANK3	0.00350145	-0.6178	0.531	0.674	1
GNPDA2	0.00350549	0.17015	0.082	0.019	1
RMND5A	0.0035128	0.288201	0.286	0.129	1
AC105916.1	0.00355524	0.308115	0.082	0.019	1
INO80C	0.00355524	0.195349	0.082	0.019	1
LRRC39	0.0035624	-0.86777	0.245	0.418	1
ZNF207	0.00356915	0.461093	0.306	0.147	1
AP3S1	0.00358083	0.458198	0.224	0.096	1
RBMS3-AS3	0.00360563	0.237661	0.082	0.019	1
C19orf53	0.00360563	0.228901	0.082	0.019	1
NUTM2B-AS1	0.00360659	0.377821	0.408	0.213	1
NUP58	0.00361714	0.388866	0.184	0.071	1
MOB2	0.00361908	0.36828	0.163	0.058	1
NFATC2	0.00363636	0.701657	0.245	0.109	1
ARID4A	0.0036388	0.173264	0.327	0.149	1
COL18A1	0.00364033	0.470213	0.224	0.095	1
ITGB3BP	0.00364275	0.16911	0.184	0.067	1
DMXL1	0.00364649	0.675149	0.388	0.214	1
GLT8D2	0.00365668	0.22443	0.082	0.019	1
USP22	0.00368112	0.519202	0.327	0.16	1
HES4	0.00368244	0.195648	0.082	0.019	1
RIOK3	0.00368921	0.330891	0.184	0.07	1
VPS13C	0.00370081	0.4618	0.469	0.276	1
WNT5B	0.00370837	0.2058	0.082	0.019	1
CD47	0.00372074	0.208353	0.204	0.078	1
STX6	0.00372962	0.379539	0.163	0.059	1
PPFIA2	0.00373447	0.214914	0.082	0.019	1
C2orf88	0.00374615	0.191202	0.143	0.046	1
TCEAL9	0.00376074	0.119068	0.082	0.019	1
AC002377.1	0.00376074	0.177036	0.082	0.019	1
GRIP2	0.0037963	-0.919191	0.184	0.368	1
TAF3	0.00379957	0.371535	0.408	0.219	1
UBAP1	0.00381219	0.3827	0.51	0.3	1
DDOST	0.00381377	0.150687	0.082	0.019	1
NDEL1	0.00381695	0.404787	0.265	0.121	1
NRDE2	0.00382059	0.279222	0.184	0.068	1
RAB6A	0.0038426	0.305933	0.286	0.131	1
KLHDC1	0.00387627	0.378572	0.245	0.108	1
RTL8C	0.00389595	0.287587	0.122	0.037	1
[truncated: 6,424 more rows]

## Sheet: Supplementary TableB2
gene	p_val	avg_log2FC	pct.1	pct.2	p_val_adj
BICC1	1.21565e-99	3.6502	0.96	0.126	4.4494e-95
COL4A4	6.15256e-97	2.37994	0.798	0.056	2.2519e-92
EBF2	1.94426e-96	2.8278	0.919	0.102	7.1162e-92
COL5A2	7.05844e-95	2.85173	0.879	0.083	2.58346e-90
ABCA6	2.66487e-93	3.13381	0.909	0.112	9.75369e-89
BNC2	2.87737e-93	2.76072	0.859	0.086	1.05315e-88
MAPK10	4.61236e-93	2.77685	0.848	0.083	1.68817e-88
UNC5C	7.7944e-91	2.9099	0.859	0.089	2.85283e-86
TFPI	1.84563e-90	2.64868	0.838	0.082	6.75519e-86
ABCA10	1.62295e-89	3.34936	0.939	0.141	5.94014e-85
PID1	1.51134e-85	2.68238	0.909	0.117	5.53164e-81
GLIS3	3.46666e-85	2.80472	0.828	0.093	1.26883e-80
FBN1	7.08184e-85	3.2693	0.96	0.158	2.59202e-80
FREM1	9.21007e-85	1.95645	0.737	0.053	3.37098e-80
COL6A3	4.60504e-84	2.48924	0.879	0.104	1.68549e-79
MEG8	5.98363e-83	2.93026	0.788	0.079	2.19007e-78
MSC-AS1	1.22554e-82	2.10862	0.737	0.057	4.48561e-78
ADAMTSL3	1.55847e-81	2.94785	0.899	0.137	5.70415e-77
PTPN13	2.68609e-80	1.55259	0.596	0.028	9.83137e-76
PTGIS	9.70386e-80	1.94997	0.616	0.032	3.55171e-75
EPHA3	1.88224e-79	2.53791	0.758	0.074	6.8892e-75
EGFR	1.41988e-78	2.66857	0.879	0.13	5.19692e-74
SULF1	8.96449e-78	1.82725	0.606	0.032	3.28109e-73
COL8A1	4.56237e-77	2.55188	0.768	0.08	1.66987e-72
ROBO1	1.32637e-76	2.84025	0.838	0.114	4.85464e-72
LHFPL2	3.34978e-76	1.63099	0.626	0.038	1.22605e-71
PODN	1.19561e-74	1.07821	0.505	0.016	4.37607e-70
SLC9A9	1.49755e-74	2.31337	0.828	0.104	5.48119e-70
ABI3BP	1.70134e-74	2.64851	0.869	0.139	6.22706e-70
RTN4	4.36889e-74	3.27718	0.869	0.146	1.59906e-69
LPCAT2	6.62019e-74	1.85374	0.646	0.046	2.42306e-69
SH3PXD2B	9.82926e-73	1.23358	0.586	0.032	3.59761e-68
AKT3	1.25781e-72	2.60939	0.929	0.184	4.60369e-68
COL4A3	4.37851e-72	1.89197	0.677	0.057	1.60258e-67
FRMD6	5.0365e-72	1.63184	0.566	0.03	1.84341e-67
ABCA9	8.44234e-72	3.06246	0.838	0.13	3.08998e-67
EBF3	2.37783e-71	1.51158	0.646	0.049	8.70308e-67
TBX18	2.44293e-71	1.28664	0.566	0.03	8.94136e-67
SVEP1	6.6454e-71	2.24579	0.636	0.049	2.43228e-66
ESR1	9.02692e-71	1.69418	0.576	0.034	3.30394e-66
SLIT2	1.98148e-70	3.44072	0.848	0.152	7.2524e-66
AXL	6.27303e-70	1.69227	0.545	0.029	2.29599e-65
FOXP2	6.30882e-70	2.70156	0.909	0.176	2.30909e-65
MEG3	1.40628e-69	2.48318	0.828	0.124	5.14713e-65
EBF1	2.57455e-69	3.09321	0.97	0.282	9.42309e-65
TNXB	4.66065e-69	2.53777	0.889	0.166	1.70584e-64
PDE5A	5.26507e-69	2.52106	0.707	0.078	1.92707e-64
SNTB1	5.41836e-69	1.93568	0.646	0.056	1.98318e-64
COL24A1	7.02966e-69	1.85359	0.566	0.035	2.57293e-64
ADAMTS19	1.5082e-68	1.7078	0.556	0.032	5.52015e-64
KCNT2	1.23659e-67	1.88408	0.636	0.053	4.52603e-63
DCLK1	1.95534e-67	2.67651	0.808	0.123	7.15673e-63
RNF24	2.38393e-67	1.91428	0.717	0.075	8.72541e-63
MMP16	5.1957e-67	2.32248	0.626	0.051	1.90168e-62
NEGR1	5.43615e-67	4.17325	0.98	0.349	1.98969e-62
LPAR1	2.5477e-66	1.80678	0.646	0.057	9.32482e-62
TRPS1	3.30661e-66	2.48926	0.869	0.165	1.21025e-61
GAS7	4.54696e-66	2.50137	0.869	0.151	1.66423e-61
COL6A2	8.01218e-66	2.56262	0.919	0.207	2.93254e-61
FMO2	1.68519e-65	2.47314	0.758	0.101	6.16795e-61
COLEC12	2.80875e-65	1.87596	0.657	0.06	1.02803e-60
CFH	9.78709e-65	2.06619	0.606	0.049	3.58217e-60
ABCA8	2.4044e-64	2.7812	0.929	0.241	8.80033e-60
ADGRB3	3.40539e-64	3.26268	0.889	0.213	1.24641e-59
GULP1	5.22881e-64	1.67416	0.545	0.036	1.9138e-59
SMOC2	9.2825e-64	2.53197	0.697	0.082	3.39749e-59
EDIL3	1.73448e-63	1.93568	0.566	0.043	6.34838e-59
CCDC80	1.01029e-62	2.16363	0.758	0.104	3.69778e-58
COL12A1	1.12422e-62	1.72999	0.677	0.072	4.11475e-58
NCAM2	1.22752e-62	2.46458	0.727	0.096	4.49285e-58
C8orf34	1.41461e-62	2.02959	0.525	0.035	5.17762e-58
ADAMTS12	2.94279e-62	1.61569	0.535	0.035	1.07709e-57
GRK5	7.71959e-62	2.26103	0.859	0.158	2.82545e-57
VCAN	8.80976e-62	2.14391	0.626	0.06	3.22446e-57
LAMB1	2.94776e-61	1.94916	0.798	0.123	1.07891e-56
MRC2	3.2577e-61	1.7488	0.717	0.087	1.19235e-56
SPATA6	4.77171e-61	1.86285	0.758	0.108	1.74649e-56
COL15A1	5.22676e-61	2.79616	0.919	0.235	1.91304e-56
PDGFRA	5.69625e-61	1.58609	0.616	0.057	2.08488e-56
ANXA2	8.0563e-61	1.57444	0.657	0.065	2.94869e-56
COL1A2	1.06799e-60	2.25001	0.859	0.154	3.90897e-56
SERPING1	1.20925e-60	1.75198	0.707	0.085	4.42598e-56
EPB41L2	1.31569e-60	1.98486	0.859	0.151	4.81557e-56
LRFN5	2.1735e-60	1.87737	0.485	0.028	7.95523e-56
TTLL7	2.43878e-60	1.4126	0.495	0.029	8.92618e-56
TSHZ2	2.53204e-60	2.27952	0.768	0.116	9.26751e-56
TSHZ3	3.03106e-60	1.28276	0.495	0.029	1.1094e-55
DENND2A	4.52805e-60	1.57829	0.677	0.073	1.65731e-55
COL5A1	5.3742e-60	1.28772	0.586	0.049	1.96701e-55
SCARA5	3.92643e-59	1.59587	0.606	0.054	1.43711e-54
RYR2	3.39043e-58	-4.06154	0.869	1	1.24093e-53
TTN	3.78945e-58	-3.88659	0.97	1	1.38698e-53
RORA	5.06862e-58	3.02651	1	0.556	1.85516e-53
ELN	7.93418e-58	1.08421	0.495	0.03	2.90399e-53
AC011246.1	8.60693e-58	3.01215	0.798	0.161	3.15022e-53
SOX5	2.47341e-57	2.57575	0.808	0.159	9.05293e-53
MATN2	2.79983e-57	1.1933	0.586	0.05	1.02477e-52
SDC2	3.57975e-57	2.15737	0.768	0.116	1.31023e-52
TMEM108	4.871e-57	2.13811	0.606	0.066	1.78284e-52
CACNA1C	1.20073e-56	-3.34815	0.596	0.995	4.39479e-52
SCN7A	2.92093e-56	3.02871	0.889	0.251	1.06909e-51
ECE1	3.26581e-56	1.36775	0.697	0.085	1.19532e-51
COL3A1	4.36996e-56	3.40331	0.808	0.167	1.59945e-51
CARMIL1	5.51343e-56	1.77243	0.626	0.07	2.01797e-51
ITIH5	5.83586e-56	1.63776	0.566	0.051	2.13598e-51
PRELP	6.66353e-56	1.5336	0.636	0.071	2.43892e-51
PTBP3	7.84221e-56	1.58042	0.727	0.101	2.87033e-51
ST8SIA1	9.75509e-56	1.46714	0.485	0.032	3.57046e-51
NOVA1	1.31196e-55	1.59139	0.505	0.038	4.8019e-51
FGF12	2.9019e-55	-3.76486	0.576	0.994	1.06213e-50
S100A4	3.69258e-55	1.00321	0.434	0.022	1.35152e-50
PTN	9.10439e-55	1.44016	0.556	0.049	3.3323e-50
RBMS3	1.42497e-54	2.34493	1	0.693	5.21554e-50
MYH7	1.49207e-54	-3.33621	0.343	0.984	5.46114e-50
LDB3	1.79104e-54	-3.43247	0.343	0.981	6.55539e-50
MYBPC3	3.10681e-54	-3.43404	0.263	0.98	1.13712e-49
MAML2	4.86572e-54	2.73034	0.899	0.264	1.7809e-49
CEP126	5.21319e-54	1.17426	0.414	0.02	1.90808e-49
NEXN	6.05382e-54	-3.47442	0.333	0.969	2.21576e-49
SORBS2	6.78208e-54	-3.45155	0.343	0.993	2.48231e-49
ZFP36L2	8.05308e-54	2.16532	0.828	0.17	2.94751e-49
SPOCK1	1.03385e-53	1.61429	0.606	0.065	3.784e-49
KIAA1755	1.76148e-53	1.37417	0.414	0.021	6.44718e-49
PDGFD	2.50573e-53	2.49991	0.808	0.176	9.17122e-49
CDH19	6.33097e-53	2.76849	0.758	0.151	2.3172e-48
ASAP2	7.6888e-53	1.38307	0.717	0.098	2.81418e-48
CTNNA3	1.09841e-52	-3.49139	0.485	0.973	4.02028e-48
RHOJ	2.19738e-52	1.87333	0.606	0.072	8.04265e-48
SOX9	2.73034e-52	1.34743	0.424	0.024	9.99332e-48
C3	4.44134e-52	1.71455	0.646	0.082	1.62557e-47
LTBP4	4.60558e-52	2.10322	0.778	0.149	1.68569e-47
MYOM1	4.81915e-52	-3.02063	0.444	0.987	1.76386e-47
TCF4	4.82462e-52	2.34706	0.97	0.399	1.76586e-47
VIT	5.34116e-52	1.37673	0.525	0.046	1.95492e-47
GFRA1	6.57629e-52	1.09418	0.434	0.025	2.40699e-47
TNNT2	6.92262e-52	-3.2724	0.283	0.964	2.53375e-47
AL365295.1	7.64478e-52	1.93031	0.545	0.056	2.79807e-47
DPT	8.08898e-52	1.0624	0.495	0.037	2.96065e-47
STON2	1.61147e-51	1.24314	0.455	0.03	5.89814e-47
CDH13	2.33738e-51	-3.21952	0.384	0.977	8.55503e-47
RBM20	2.34641e-51	-3.64941	0.232	0.954	8.58811e-47
COL6A1	2.39305e-51	2.02991	0.859	0.207	8.75881e-47
SPRY2	3.02186e-51	1.13277	0.505	0.042	1.10603e-46
ADGRL3	5.89681e-51	2.70131	0.778	0.175	2.15829e-46
CALCRL	1.75423e-50	2.15547	0.677	0.101	6.42066e-46
MGST1	2.01726e-50	1.24451	0.455	0.031	7.38337e-46
PLSCR4	2.05323e-50	1.13223	0.485	0.038	7.51501e-46
HEYL	2.08982e-50	1.64715	0.465	0.036	7.64895e-46
BMP4	2.18186e-50	0.630635	0.323	0.008	7.98582e-46
ACSM3	2.45916e-50	2.79468	0.677	0.117	9.00077e-46
NEBL	3.90533e-50	-3.35041	0.273	0.95	1.42939e-45
RAB8B	4.33212e-50	1.29355	0.566	0.06	1.5856e-45
EMILIN1	4.55595e-50	0.984119	0.394	0.02	1.66752e-45
BGN	6.15552e-50	1.39732	0.545	0.054	2.25298e-45
ADAMTS5	6.53286e-50	0.821276	0.343	0.012	2.39109e-45
TMTC2	7.88596e-50	1.94867	0.687	0.108	2.88634e-45
ECM2	1.30702e-49	0.792299	0.424	0.025	4.78382e-45
ANTXR1	1.87926e-49	1.38451	0.687	0.1	6.87829e-45
LTBP2	2.48796e-49	1.16484	0.465	0.035	9.10618e-45
SLC8A1	3.91964e-49	-2.44868	0.788	0.993	1.43463e-44
MFAP4	8.74782e-49	0.876667	0.374	0.017	3.20179e-44
MALAT1	1.30175e-48	-1.26713	1	1	4.76452e-44
CORO2B	1.30758e-48	1.01089	0.465	0.036	4.78589e-44
ARHGAP6	1.5624e-48	1.93564	0.586	0.074	5.71853e-44
SUSD1	1.67087e-48	1.20433	0.465	0.037	6.11555e-44
FBLN1	2.15112e-48	1.67859	0.667	0.097	7.87331e-44
RRBP1	2.56592e-48	1.40632	0.596	0.072	9.39153e-44
DMD	5.33755e-48	-2.72363	0.768	0.983	1.9536e-43
PLEKHH2	7.66397e-48	0.92463	0.394	0.022	2.80509e-43
SLC4A7	8.7591e-48	2.23851	0.808	0.194	3.20592e-43
PAMR1	9.65878e-48	1.17821	0.384	0.021	3.53521e-43
ANKS1B	1.05323e-47	1.92288	0.646	0.098	3.85492e-43
ACTN2	1.12532e-47	-3.15167	0.242	0.928	4.1188e-43
SORBS1	2.05981e-47	-2.64329	0.515	0.973	7.53912e-43
TUBB6	2.71333e-47	1.19247	0.606	0.075	9.93105e-43
PLXDC1	5.55993e-47	1.24743	0.586	0.07	2.03499e-42
MARCKS	7.806e-47	1.29645	0.606	0.078	2.85707e-42
SOD3	8.03522e-47	1.01228	0.455	0.036	2.94097e-42
MAMDC2	1.25929e-46	1.28216	0.505	0.049	4.60912e-42
UST	1.86241e-46	1.92877	0.798	0.173	6.8166e-42
RAPH1	2.01355e-46	1.42371	0.576	0.072	7.36979e-42
TRIM22	2.87677e-46	0.756207	0.384	0.022	1.05293e-41
ATP6V0A1	3.92671e-46	1.24322	0.616	0.082	1.43721e-41
PLCB1	4.00552e-46	2.28107	0.869	0.254	1.46606e-41
TCF7L1	4.5608e-46	1.509	0.606	0.081	1.6693e-41
AKAP12	5.59661e-46	1.44209	0.566	0.07	2.04842e-41
TBC1D16	7.31759e-46	1.02288	0.475	0.043	2.67831e-41
FBLN5	9.54983e-46	1.04854	0.525	0.053	3.49533e-41
SRPX2	1.35417e-45	0.936723	0.303	0.009	4.95639e-41
IGSF10	1.38838e-45	0.776038	0.354	0.017	5.08162e-41
NRK	1.39713e-45	1.39602	0.455	0.039	5.11362e-41
HMGCLL1	1.43281e-45	1.45016	0.394	0.025	5.24425e-41
CMYA5	1.86728e-45	-2.93389	0.343	0.926	6.83444e-41
ANXA1	1.89311e-45	1.75153	0.545	0.063	6.92896e-41
SPECC1	2.72292e-45	1.32916	0.485	0.048	9.96618e-41
PLAGL1	2.84714e-45	1.78717	0.697	0.125	1.04208e-40
PDE3A	2.99752e-45	-2.53324	0.687	0.962	1.09712e-40
CYP1B1-AS1	3.74555e-45	1.14758	0.374	0.022	1.37091e-40
EPS8	3.79911e-45	2.01912	0.707	0.132	1.39051e-40
RERG	5.87011e-45	1.86801	0.495	0.054	2.14852e-40
APCDD1	6.90328e-45	1.18207	0.535	0.06	2.52667e-40
ANKRD1	7.51029e-45	-3.3034	0.253	0.905	2.74884e-40
OAF	8.75817e-45	1.00602	0.444	0.037	3.20558e-40
MAN2A1	1.06452e-44	1.64322	0.636	0.1	3.89626e-40
LINC02208	1.20626e-44	-3.33783	0.293	0.917	4.41504e-40
SERPINF1	1.93877e-44	1.2327	0.465	0.043	7.09609e-40
ABLIM1	2.92629e-44	-2.12162	0.778	0.972	1.07105e-39
EMP1	3.04737e-44	1.79623	0.657	0.107	1.11537e-39
COL6A6	3.27402e-44	1.1701	0.404	0.029	1.19832e-39
PREX2	3.58304e-44	1.83772	0.727	0.147	1.31143e-39
ARL13B	3.61079e-44	1.43969	0.525	0.063	1.32158e-39
CACNB2	5.31811e-44	-2.96469	0.323	0.918	1.94648e-39
TRIM9	7.62076e-44	1.03632	0.323	0.014	2.78927e-39
PI16	9.75251e-44	1.25613	0.333	0.016	3.56952e-39
AC092353.2	1.10345e-43	-3.30532	0.222	0.9	4.03873e-39
ALDH1A2	1.16107e-43	1.45537	0.576	0.076	4.24962e-39
PDE1A	1.3869e-43	1.8467	0.727	0.146	5.07619e-39
NNMT	1.39254e-43	0.93445	0.323	0.014	5.09684e-39
AEBP1	1.61596e-43	0.909106	0.364	0.021	5.91456e-39
PELI2	1.80355e-43	1.52087	0.465	0.046	6.60116e-39
MXRA8	1.95524e-43	0.736859	0.394	0.027	7.15636e-39
SKIL	1.97132e-43	1.54193	0.677	0.121	7.21522e-39
ECM1	2.2977e-43	0.872542	0.434	0.035	8.40981e-39
FHOD3	2.35075e-43	-3.13426	0.202	0.892	8.60397e-39
SESTD1	2.82715e-43	1.72545	0.697	0.134	1.03476e-38
VIM	2.9864e-43	1.8225	0.818	0.206	1.09305e-38
AFAP1	3.11432e-43	1.0919	0.424	0.035	1.13987e-38
SGIP1	4.91018e-43	1.80449	0.596	0.089	1.79717e-38
SGCD	5.92814e-43	-2.27345	0.788	0.963	2.16976e-38
THSD4	6.61612e-43	-2.63085	0.404	0.927	2.42156e-38
NR4A3	1.32299e-42	-3.60205	0.222	0.878	4.84229e-38
LPL	1.33558e-42	-3.45449	0.141	0.863	4.88837e-38
TPM1	1.97984e-42	-2.6863	0.424	0.907	7.24642e-38
EFEMP1	2.07422e-42	1.33887	0.475	0.051	7.59185e-38
GNAQ	2.59258e-42	1.62079	0.747	0.155	9.48911e-38
LSP1	2.76156e-42	0.881233	0.414	0.032	1.01076e-37
PLTP	6.48758e-42	0.865564	0.384	0.027	2.37452e-37
UGDH	9.90233e-42	2.00748	0.354	0.022	3.62435e-37
RGMA	1.02353e-41	1.00127	0.434	0.039	3.74623e-37
AC004160.1	1.09427e-41	1.6029	0.333	0.019	4.00513e-37
AKAP6	1.2472e-41	-2.97453	0.222	0.883	4.56489e-37
CADPS2	1.46446e-41	1.61266	0.667	0.124	5.36006e-37
SPON1	1.60285e-41	0.89881	0.364	0.023	5.8666e-37
ISLR	1.63566e-41	0.906157	0.343	0.02	5.98669e-37
GNA14	1.65209e-41	1.45426	0.374	0.027	6.04683e-37
PDLIM5	1.75886e-41	-2.06596	0.828	0.955	6.4376e-37
SPRY1	1.7669e-41	1.35277	0.495	0.057	6.46703e-37
PHLDB1	1.812e-41	1.45034	0.758	0.148	6.63209e-37
TRDN	3.1855e-41	-2.91848	0.232	0.87	1.16592e-36
EFCC1	5.99441e-41	0.811402	0.323	0.016	2.19401e-36
KCNS3	6.26015e-41	1.12966	0.384	0.029	2.29128e-36
SNTB2	6.74193e-41	1.05332	0.495	0.056	2.46762e-36
MYOM2	7.9244e-41	-2.85532	0.182	0.874	2.90041e-36
AL035446.2	9.58073e-41	2.68016	0.404	0.038	3.50664e-36
PITPNB	9.65837e-41	1.35968	0.687	0.127	3.53506e-36
CSRNP1	1.01783e-40	0.804173	0.354	0.022	3.72536e-36
DYNC2H1	1.16848e-40	1.28749	0.626	0.104	4.27676e-36
MYADM	1.35334e-40	1.183	0.505	0.061	4.95335e-36
FAIM2	1.60247e-40	0.669403	0.253	0.006	5.8652e-36
MLIP	1.71106e-40	-2.89138	0.323	0.877	6.26265e-36
COL1A1	2.20139e-40	0.857978	0.394	0.031	8.05732e-36
C1R	2.65962e-40	1.04019	0.475	0.051	9.73449e-36
MGP	2.66341e-40	2.12279	0.838	0.24	9.74836e-36
PXDN	2.70404e-40	0.872772	0.434	0.041	9.89704e-36
ITGA5	2.7932e-40	1.52527	0.596	0.092	1.02234e-35
PLCH1	3.07989e-40	1.05452	0.384	0.03	1.12727e-35
BTBD19	3.73486e-40	0.621834	0.222	0.002	1.367e-35
SYTL4	4.13343e-40	0.672548	0.283	0.01	1.51288e-35
CYTH3	7.11249e-40	1.61404	0.778	0.181	2.60324e-35
MT-ND1	1.431e-39	-1.86625	0.939	1	5.23759e-35
SMC5	1.51661e-39	1.36146	0.788	0.183	5.55094e-35
WTAP	1.60293e-39	1.11125	0.576	0.088	5.8669e-35
STARD9	1.70303e-39	1.29992	0.646	0.112	6.23326e-35
CDC42EP2	1.7889e-39	0.701837	0.333	0.02	6.54756e-35
NOX4	1.8317e-39	1.19407	0.303	0.015	6.70419e-35
NCOA7	1.93066e-39	1.22861	0.495	0.06	7.06642e-35
LARGE1	2.01647e-39	-2.39112	0.525	0.913	7.38047e-35
MYL2	2.05644e-39	-2.61741	0.364	0.886	7.52676e-35
FAM107B	2.25034e-39	1.54129	0.444	0.049	8.23646e-35
TNNI3	2.2819e-39	-2.60759	0.202	0.881	8.352e-35
TC2N	2.66246e-39	1.18058	0.414	0.038	9.74488e-35
CACHD1	2.94697e-39	1.13533	0.444	0.048	1.07862e-34
SLC25A43	3.49405e-39	0.753801	0.263	0.008	1.27886e-34
SSBP2	4.42093e-39	1.82532	0.929	0.39	1.61811e-34
FBLN2	4.46418e-39	1.3787	0.616	0.104	1.63393e-34
HMCN2	4.78466e-39	1.13304	0.394	0.034	1.75123e-34
PLXDC2	4.91255e-39	2.12209	0.869	0.292	1.79804e-34
PLAC9	4.99889e-39	0.844097	0.434	0.042	1.82964e-34
FN1	6.33193e-39	2.29894	0.657	0.129	2.31755e-34
TCF21	7.15989e-39	0.743925	0.283	0.012	2.62059e-34
PPP3CA	7.26007e-39	1.511	0.818	0.204	2.65726e-34
CATSPERB	7.56595e-39	1.22354	0.303	0.015	2.76921e-34
TIMP1	7.68425e-39	1.27496	0.394	0.035	2.81251e-34
NOTCH2	8.27532e-39	1.09243	0.586	0.09	3.02885e-34
LAMC1	8.50019e-39	2.02208	0.848	0.291	3.11116e-34
DCN	9.22589e-39	2.48213	0.939	0.491	3.37677e-34
OGN	1.01566e-38	0.910167	0.374	0.029	3.71743e-34
EVC2	1.02204e-38	0.619281	0.283	0.012	3.74075e-34
TENM2	1.14157e-38	-2.69255	0.283	0.868	4.17824e-34
NRIP1	1.28313e-38	1.66078	0.758	0.187	4.69638e-34
MUSK	1.39166e-38	0.921097	0.354	0.025	5.09363e-34
CNN3	1.98961e-38	1.19149	0.626	0.108	7.28219e-34
TRERF1	2.25871e-38	0.966458	0.434	0.044	8.2671e-34
EGR1	4.30632e-38	1.87628	0.98	0.57	1.57615e-33
CYSLTR2	5.9126e-38	1.11534	0.343	0.024	2.16407e-33
GSN	7.01446e-38	2.33951	0.919	0.518	2.56736e-33
PLCL1	7.88904e-38	-2.3916	0.394	0.921	2.88747e-33
DPYD	8.46857e-38	1.81415	0.929	0.411	3.09958e-33
MLXIP	8.83846e-38	1.13257	0.556	0.083	3.23497e-33
C7	9.15391e-38	2.38564	0.818	0.261	3.35042e-33
CST3	9.63847e-38	1.68282	0.798	0.207	3.52778e-33
TTC39B	1.02732e-37	0.835623	0.343	0.024	3.76009e-33
RUFY3	1.16771e-37	1.49183	0.717	0.162	4.27392e-33
KCNN3	1.21269e-37	1.23407	0.384	0.034	4.43857e-33
DPYSL3	1.23907e-37	1.32681	0.444	0.049	4.53511e-33
MYCBP2	1.27837e-37	1.67732	0.879	0.277	4.67898e-33
PALLD	1.33862e-37	-1.89235	0.768	0.972	4.89947e-33
FAM171A1	1.42426e-37	0.976801	0.444	0.049	5.21293e-33
LONRF1	3.4617e-37	1.1064	0.505	0.068	1.26702e-32
TMEM132C	4.11521e-37	1.38417	0.343	0.025	1.50621e-32
SEC24D	4.69849e-37	1.5922	0.636	0.127	1.71969e-32
TLE4	5.25106e-37	1.33215	0.586	0.102	1.92194e-32
FAM114A1	5.5745e-37	0.925098	0.434	0.046	2.04032e-32
LTBP3	8.28355e-37	0.81897	0.525	0.072	3.03186e-32
CLMP	9.70741e-37	1.00803	0.364	0.03	3.55301e-32
CHRM2	1.06098e-36	-2.94002	0.182	0.831	3.88329e-32
AKR1C1	1.22329e-36	0.880583	0.222	0.005	4.47735e-32
SH3BP5	1.3134e-36	0.640329	0.323	0.021	4.80717e-32
MAN1A1	1.49061e-36	1.91621	0.707	0.169	5.45577e-32
ZNF618	1.64823e-36	0.607084	0.323	0.021	6.03269e-32
AC005162.3	1.69392e-36	0.604601	0.263	0.01	6.19992e-32
RFX3	1.9669e-36	1.88358	0.657	0.141	7.19904e-32
TNFRSF21	1.96889e-36	0.874521	0.364	0.03	7.20632e-32
MYO18B	2.19857e-36	-2.69959	0.152	0.815	8.04698e-32
FAM198B-AS1	2.46324e-36	1.31842	0.596	0.11	9.0157e-32
LAMA2	2.55616e-36	1.29123	1	0.983	9.35579e-32
ASPN	3.11003e-36	0.854353	0.394	0.037	1.1383e-31
GLI2	4.08789e-36	0.836685	0.313	0.02	1.49621e-31
RCAN2	4.23558e-36	-2.52137	0.283	0.857	1.55026e-31
PLA2G4A	4.97801e-36	0.901136	0.293	0.016	1.822e-31
C1S	5.80209e-36	1.14211	0.505	0.071	2.12362e-31
FNDC3B	6.13204e-36	1.70209	0.939	0.64	2.24439e-31
SGCE	6.54533e-36	1.13838	0.354	0.03	2.39566e-31
ELMO1	6.82584e-36	1.40631	0.717	0.159	2.49833e-31
FHL2	7.20227e-36	-3.05824	0.222	0.845	2.6361e-31
CRY1	7.7179e-36	1.72162	0.596	0.111	2.82483e-31
ADAM17	8.214e-36	1.32318	0.646	0.129	3.00641e-31
ANKRD10	1.01376e-35	1.13859	0.657	0.127	3.71046e-31
ZFP36L1	1.0468e-35	1.56286	0.636	0.13	3.8314e-31
ABCC4	1.11348e-35	0.988364	0.354	0.029	4.07546e-31
IL4R	1.12654e-35	0.445999	0.242	0.008	4.12326e-31
CXCL12	1.26985e-35	1.02935	0.525	0.079	4.64779e-31
SREBF1	1.91522e-35	0.7026	0.364	0.031	7.00991e-31
LINC00632	3.53337e-35	0.965823	0.343	0.028	1.29325e-30
NBL1	3.82114e-35	0.866796	0.313	0.021	1.39858e-30
CDH2	4.67084e-35	-2.84452	0.253	0.819	1.70958e-30
EXT1	5.10485e-35	2.03505	0.899	0.435	1.86843e-30
HAS2	5.76856e-35	1.36172	0.253	0.01	2.11135e-30
PPP1R12B	5.95892e-35	-2.11116	0.626	0.893	2.18102e-30
FLRT2	6.42218e-35	1.43302	0.364	0.034	2.35058e-30
GNG2	6.9842e-35	0.933591	0.384	0.037	2.55629e-30
AL590807.1	7.30022e-35	0.922554	0.293	0.017	2.67195e-30
SPRED1	7.60843e-35	1.35105	0.505	0.078	2.78476e-30
ODF2L	8.03869e-35	0.88523	0.475	0.064	2.94224e-30
TRDN-AS1	8.17197e-35	-2.89068	0.182	0.806	2.99102e-30
LUM	8.27579e-35	1.76258	0.687	0.163	3.02902e-30
BMPER	8.38414e-35	1.24601	0.333	0.027	3.06868e-30
SRSF7	8.41613e-35	0.820093	0.414	0.046	3.08039e-30
PRKD3	1.20263e-34	0.990018	0.455	0.058	4.40175e-30
LINC02580	1.23396e-34	0.437749	0.222	0.006	4.51643e-30
PRRT2	1.24082e-34	0.43324	0.172	0	4.54154e-30
AC004889.1	1.31697e-34	0.544079	0.273	0.014	4.82024e-30
OGFRL1	1.6055e-34	0.640218	0.354	0.03	5.8763e-30
CNTLN	1.72e-34	1.04458	0.525	0.08	6.29536e-30
BOC	1.85994e-34	0.828837	0.313	0.022	6.80756e-30
NAB1	1.9561e-34	0.760566	0.444	0.053	7.15952e-30
LRRK2	1.9795e-34	0.905067	0.505	0.073	7.24517e-30
SHISA3	2.12336e-34	0.813396	0.283	0.016	7.77169e-30
MECOM	2.13367e-34	2.05705	0.859	0.319	7.80943e-30
ZNF207	2.24699e-34	1.07712	0.697	0.147	8.22422e-30
TAGLN2	3.1933e-34	0.87205	0.535	0.081	1.16878e-29
IL33	3.64439e-34	0.810417	0.424	0.049	1.33388e-29
BAZ1A	3.70286e-34	1.06055	0.505	0.074	1.35528e-29
HMCN1	4.6565e-34	1.60713	0.556	0.102	1.70433e-29
PLA2G5	4.81612e-34	2.09479	0.727	0.202	1.76275e-29
AC097522.2	5.30257e-34	-2.68447	0.212	0.826	1.94079e-29
PCOLCE	6.56282e-34	0.690664	0.323	0.024	2.40206e-29
DTNA	9.32538e-34	-2.68111	0.182	0.793	3.41318e-29
ADH1B	9.47117e-34	1.40511	0.485	0.071	3.46654e-29
CCSER1	1.00103e-33	-2.76392	0.253	0.812	3.66389e-29
GALNT17	1.00564e-33	-2.67741	0.202	0.808	3.68075e-29
CLSTN2	1.02465e-33	1.67076	0.455	0.065	3.75032e-29
HIC1	1.10172e-33	0.691443	0.343	0.029	4.03241e-29
ARSJ	1.17696e-33	0.841068	0.253	0.012	4.30778e-29
EMILIN3	1.42057e-33	0.60781	0.232	0.008	5.19943e-29
UGGT2	1.45209e-33	1.27182	0.727	0.178	5.31481e-29
PKD2	1.46775e-33	1.07214	0.636	0.126	5.37212e-29
BNIP3L	1.48496e-33	1.1466	0.727	0.168	5.43512e-29
PCSK6	1.62323e-33	1.74444	0.747	0.207	5.94118e-29
TNFRSF1A	2.09839e-33	0.846388	0.444	0.057	7.6803e-29
LIMA1	2.26321e-33	1.31506	0.525	0.089	8.28356e-29
WSB1	2.57597e-33	1.4456	0.818	0.26	9.4283e-29
MAGI1	3.16668e-33	-2.1842	0.333	0.864	1.15904e-28
NFKBIZ	3.17176e-33	1.22732	0.434	0.056	1.16089e-28
MIR1-1HG	3.32657e-33	-2.92956	0.101	0.76	1.21756e-28
RGS6	4.06919e-33	-2.88605	0.162	0.784	1.48937e-28
ASXL1	4.20893e-33	1.13557	0.677	0.145	1.54051e-28
GALNT7	4.59681e-33	1.02052	0.444	0.058	1.68248e-28
CEBPD	5.68929e-33	0.965269	0.404	0.048	2.08234e-28
ATP10D	6.24872e-33	1.10844	0.495	0.078	2.28709e-28
COL5A3	6.4656e-33	1.37175	0.465	0.066	2.36648e-28
NEAT1	8.04027e-33	-1.12522	1	0.998	2.94282e-28
NPPC	8.82477e-33	0.534929	0.212	0.006	3.22995e-28
EIF4A1	9.18703e-33	0.978818	0.646	0.132	3.36254e-28
MAGI3	9.31007e-33	1.62837	0.687	0.178	3.40758e-28
TNNI3K	9.9091e-33	-2.40236	0.384	0.835	3.62683e-28
KIRREL1	1.01595e-32	0.788883	0.323	0.027	3.71847e-28
FYN	1.73725e-32	1.38992	0.778	0.212	6.35852e-28
PER2	1.85799e-32	0.872199	0.475	0.068	6.80044e-28
CREB3L2	1.90481e-32	1.30629	0.626	0.134	6.97178e-28
MYL3	1.97266e-32	-2.55817	0.172	0.775	7.22012e-28
ANGPTL1	2.73643e-32	0.613569	0.273	0.016	1.00156e-27
SPRY4	2.8361e-32	0.477087	0.232	0.009	1.03804e-27
ETNK1	2.85001e-32	1.11127	0.576	0.109	1.04313e-27
S100A6	3.37252e-32	0.943458	0.444	0.059	1.23438e-27
LINC02614	3.67148e-32	0.625389	0.253	0.013	1.3438e-27
LMO3	6.76257e-32	0.940694	0.273	0.017	2.47517e-27
SOBP	7.30722e-32	1.70767	0.828	0.304	2.67451e-27
THBS2	7.90938e-32	0.999374	0.364	0.038	2.89491e-27
MIR99AHG	9.25551e-32	1.62206	0.97	0.655	3.38761e-27
C1RL	1.00868e-31	0.637593	0.263	0.015	3.69185e-27
PTPRD	1.09605e-31	1.60261	0.687	0.176	4.01167e-27
TMEM263	1.21977e-31	0.7504	0.404	0.049	4.46448e-27
CFD	1.37664e-31	1.96482	0.717	0.213	5.03863e-27
TECRL	1.47881e-31	-2.76068	0.202	0.78	5.41261e-27
ZFP36	1.85414e-31	1.82635	0.727	0.209	6.78633e-27
DHX15	1.88711e-31	1.08902	0.566	0.109	6.90701e-27
LONRF3	2.64153e-31	0.968341	0.313	0.027	9.66825e-27
PTEN	3.09439e-31	1.55353	0.737	0.213	1.13258e-26
TIAM1	3.6543e-31	0.994628	0.444	0.063	1.33751e-26
LGALS1	3.79402e-31	0.947201	0.576	0.108	1.38865e-26
SH3BGRL	4.70507e-31	0.980346	0.465	0.07	1.7221e-26
LASP1	4.80108e-31	0.851431	0.343	0.035	1.75724e-26
C3orf70	5.02406e-31	0.612316	0.253	0.014	1.83886e-26
ABCA9-AS1	5.11166e-31	0.754667	0.232	0.01	1.87092e-26
RFTN2	5.97881e-31	0.77492	0.313	0.027	2.18831e-26
ADCY5	6.35721e-31	-2.66151	0.152	0.753	2.3268e-26
AL591501.1	6.96316e-31	1.4953	0.364	0.043	2.54859e-26
NCOA1	7.19519e-31	1.58107	0.909	0.466	2.63351e-26
INHBA	8.31423e-31	0.743572	0.222	0.009	3.04309e-26
GAS1	8.53068e-31	0.689833	0.293	0.022	3.12232e-26
DES	9.47481e-31	-2.29018	0.192	0.791	3.46788e-26
ANXA5	1.008e-30	1.37354	0.576	0.121	3.68937e-26
MEDAG	1.16061e-30	0.608728	0.192	0.005	4.24795e-26
LMOD2	1.21132e-30	-2.83092	0.121	0.729	4.43353e-26
SASH1	1.34106e-30	1.49484	0.818	0.283	4.90842e-26
CYP27A1	1.38488e-30	0.939916	0.303	0.025	5.06878e-26
SPRED2	1.40405e-30	1.51401	0.677	0.175	5.13898e-26
CYBRD1	1.43643e-30	0.90966	0.545	0.098	5.25748e-26
DPYSL2	1.44095e-30	1.17341	0.646	0.143	5.27404e-26
CDH11	1.45695e-30	0.8817	0.293	0.023	5.33258e-26
TENM1	1.53617e-30	0.866523	0.273	0.019	5.62253e-26
TACC2	1.57971e-30	-2.25421	0.354	0.813	5.7819e-26
RAP1B	1.6842e-30	1.11216	0.697	0.171	6.16435e-26
CD81	1.70745e-30	1.05585	0.697	0.16	6.24943e-26
MN1	1.73904e-30	0.814439	0.313	0.028	6.36507e-26
RPL3	1.82432e-30	0.681214	0.465	0.068	6.6772e-26
IER5L	1.83906e-30	0.511947	0.222	0.009	6.73113e-26
AC245297.3	1.89454e-30	0.680925	0.273	0.019	6.93421e-26
FTL	1.90745e-30	1.14034	0.636	0.139	6.98144e-26
AC020916.1	2.08623e-30	1.7232	0.808	0.254	7.6358e-26
DSEL	2.16062e-30	0.485156	0.222	0.009	7.90809e-26
THBS3	2.85274e-30	0.391103	0.222	0.009	1.04413e-25
HNRNPLL	3.02317e-30	1.01958	0.465	0.074	1.10651e-25
FTX	3.08632e-30	1.26975	0.98	0.779	1.12962e-25
ADAMTSL4-AS1	3.38178e-30	0.618295	0.283	0.021	1.23777e-25
C15orf41	3.63624e-30	-2.21516	0.404	0.855	1.3309e-25
TENM4	4.18073e-30	0.923489	0.333	0.034	1.53019e-25
PDZRN3	4.22449e-30	-2.09581	0.404	0.853	1.5462e-25
ITGBL1	4.808e-30	1.48042	0.364	0.043	1.75978e-25
OLFML3	4.98194e-30	0.571141	0.212	0.008	1.82344e-25
NPHP3	5.51653e-30	0.944899	0.535	0.1	2.01911e-25
AC090630.1	5.62048e-30	0.923041	0.273	0.02	2.05715e-25
IGFBP3	5.6749e-30	0.834545	0.384	0.046	2.07707e-25
PAXIP1-AS2	6.43223e-30	0.536493	0.212	0.008	2.35426e-25
PAPPA	7.07836e-30	0.768185	0.263	0.017	2.59075e-25
SEPTIN7	7.62556e-30	1.13886	0.717	0.191	2.79103e-25
PTPN12	7.69205e-30	1.16968	0.657	0.151	2.81537e-25
ZNF846	8.02456e-30	0.732657	0.354	0.038	2.93707e-25
PTMS	8.83543e-30	0.620636	0.424	0.057	3.23385e-25
STAMBPL1	9.49536e-30	0.789931	0.283	0.022	3.4754e-25
RGL3	9.64741e-30	0.41568	0.253	0.015	3.53105e-25
SERINC5	9.68981e-30	1.27547	0.626	0.146	3.54657e-25
ESRRG	1.24219e-29	-2.22486	0.232	0.801	4.54653e-25
AL445250.1	1.24723e-29	1.43242	0.364	0.045	4.565e-25
ZNF423	1.30651e-29	0.87516	0.384	0.048	4.78194e-25
SH3RF1	1.4321e-29	1.27537	0.586	0.126	5.24164e-25
MAP4K5	1.48994e-29	1.14234	0.515	0.096	5.45333e-25
TMEM178B	1.49158e-29	-2.50503	0.192	0.76	5.45932e-25
MIER1	1.54629e-29	1.06757	0.556	0.11	5.65959e-25
KLHL29	1.729e-29	1.14444	0.354	0.041	6.32833e-25
STK3	1.73133e-29	1.38941	0.889	0.368	6.33683e-25
MYO1B	1.80499e-29	1.01292	0.455	0.07	6.60646e-25
CRISPLD2	1.90478e-29	0.842135	0.364	0.043	6.97169e-25
TXNDC5	1.94136e-29	0.539445	0.273	0.02	7.10559e-25
PGAP1	2.37034e-29	0.877426	0.394	0.052	8.67567e-25
FMNL3	2.80742e-29	0.738693	0.303	0.027	1.02754e-24
RUSC2	2.81894e-29	1.15189	0.586	0.124	1.03176e-24
GLS	3.05458e-29	1.38242	0.687	0.184	1.11801e-24
HNMT	3.07405e-29	0.561146	0.242	0.014	1.12513e-24
ACOT11	3.15919e-29	-2.45541	0.162	0.737	1.15629e-24
AC011287.1	3.19204e-29	-2.792	0.232	0.771	1.16832e-24
CDO1	3.43338e-29	0.411808	0.192	0.006	1.25665e-24
TMED5	3.45646e-29	0.775519	0.465	0.074	1.2651e-24
CHD9	3.58998e-29	1.50024	0.909	0.425	1.31397e-24
CNKSR2	3.61468e-29	0.944023	0.364	0.043	1.32301e-24
OBSCN	3.81485e-29	-2.39928	0.192	0.751	1.39627e-24
TANK	4.17912e-29	1.13874	0.697	0.182	1.5296e-24
IGF1	4.4377e-29	0.82184	0.343	0.037	1.62424e-24
MAP7D3	4.86136e-29	0.514204	0.313	0.029	1.7793e-24
CPEB4	5.15628e-29	-2.21384	0.394	0.803	1.88725e-24
IFT57	5.50968e-29	0.549471	0.253	0.016	2.0166e-24
CD34	5.75813e-29	0.895262	0.434	0.064	2.10753e-24
BZW1	6.40736e-29	0.561904	0.354	0.039	2.34516e-24
SCYL2	8.43599e-29	0.85435	0.495	0.086	3.08766e-24
EFNA5	9.73231e-29	-2.48004	0.152	0.745	3.56212e-24
EGR2	1.01999e-28	0.894646	0.394	0.052	3.73327e-24
SRGAP1	1.04723e-28	1.29362	0.626	0.148	3.83295e-24
MYH7B	1.10002e-28	-2.50354	0.162	0.724	4.02618e-24
DDHD1	1.13302e-28	1.08116	0.455	0.076	4.14698e-24
PDGFRB	1.25989e-28	0.891775	0.424	0.061	4.61133e-24
CES1	1.43497e-28	0.709704	0.303	0.028	5.25214e-24
NRAP	1.46692e-28	-2.50907	0.121	0.708	5.36906e-24
STX12	1.59567e-28	0.975676	0.545	0.109	5.84031e-24
ERBB4	1.73739e-28	-2.24309	0.313	0.797	6.35902e-24
ATP10A	1.75018e-28	0.789407	0.293	0.025	6.40584e-24
LINC02802	1.78231e-28	0.362169	0.172	0.003	6.52344e-24
TULP3	1.86582e-28	0.65148	0.384	0.049	6.82909e-24
RPS10	1.9003e-28	0.584716	0.293	0.025	6.95529e-24
DYNC2LI1	2.00008e-28	0.692466	0.333	0.036	7.3205e-24
AC006007.1	2.06196e-28	0.429374	0.162	0.002	7.54696e-24
CASP4	2.07927e-28	0.465412	0.273	0.021	7.61033e-24
JUNB	2.21895e-28	1.39019	0.657	0.165	8.12156e-24
SEC31A	2.22242e-28	1.13885	0.758	0.229	8.13427e-24
F2R	2.22286e-28	0.734236	0.313	0.031	8.13591e-24
CD36	2.49623e-28	-2.3282	0.172	0.761	9.13644e-24
ARHGAP22	2.59668e-28	0.832414	0.434	0.065	9.50413e-24
CC2D2A	2.71373e-28	0.735469	0.333	0.036	9.93254e-24
JAK1	2.7397e-28	1.45031	0.879	0.35	1.00276e-23
CPNE8	4.11538e-28	0.974876	0.424	0.065	1.50627e-23
ANKDD1A	4.22686e-28	0.430683	0.202	0.008	1.54707e-23
DLG2	4.46614e-28	-1.42913	0.859	0.952	1.63465e-23
ZEB2	5.05245e-28	1.88088	0.869	0.382	1.84925e-23
EPB41L3	5.1806e-28	0.653589	0.323	0.034	1.89615e-23
FKBP10	5.27572e-28	0.435988	0.202	0.008	1.93097e-23
MMP2	5.3073e-28	1.43498	0.657	0.176	1.94252e-23
GALNT2	5.69908e-28	0.823009	0.545	0.107	2.08592e-23
AP001528.1	6.0941e-28	0.955376	0.404	0.058	2.2305e-23
COL14A1	6.9016e-28	0.863513	0.354	0.043	2.52605e-23
ANGPTL2	6.97725e-28	0.692719	0.343	0.039	2.55374e-23
HNRNPD	7.71117e-28	0.911348	0.606	0.132	2.82237e-23
CPQ	8.75498e-28	1.40248	0.808	0.286	3.20441e-23
PDE4DIP	8.95834e-28	-2.29469	0.263	0.742	3.27884e-23
SMURF2	9.3932e-28	1.12141	0.586	0.13	3.43801e-23
TCF7L2	1.02589e-27	1.24649	0.838	0.295	3.75487e-23
COL18A1	1.03175e-27	0.923154	0.515	0.095	3.7763e-23
XIRP2	1.17508e-27	-2.51359	0.162	0.72	4.30091e-23
CD63	1.2417e-27	0.830371	0.495	0.088	4.54476e-23
OSMR	1.3941e-27	1.20549	0.343	0.042	5.10255e-23
CENPC	1.5943e-27	0.850445	0.545	0.109	5.83529e-23
GFPT2	1.59592e-27	0.924543	0.242	0.016	5.84124e-23
CALU	1.7207e-27	1.09042	0.616	0.146	6.29792e-23
CABLES1	1.78432e-27	0.627883	0.242	0.016	6.5308e-23
STAT5B	1.80061e-27	0.999347	0.495	0.092	6.59041e-23
AZI2	1.86834e-27	0.828272	0.394	0.057	6.8383e-23
KMT2A	1.95468e-27	1.15424	0.737	0.214	7.15433e-23
ADAMTS2	2.09781e-27	0.569024	0.212	0.01	7.67819e-23
SORCS1	2.32543e-27	1.59421	0.364	0.05	8.51131e-23
SELENOP	2.38602e-27	0.895067	0.535	0.105	8.73306e-23
ZEB1	2.47661e-27	1.72455	0.899	0.51	9.06463e-23
TIMP2	2.53234e-27	1.15246	0.667	0.178	9.26861e-23
ATP11C	2.61832e-27	0.934199	0.414	0.064	9.58331e-23
SERPINE2	3.03664e-27	0.551708	0.242	0.016	1.11144e-22
ADCY1	3.23056e-27	0.955566	0.323	0.037	1.18242e-22
ARHGAP21	3.56034e-27	1.38774	0.818	0.313	1.30312e-22
DNM1	3.57805e-27	0.547133	0.293	0.028	1.3096e-22
FGF2	3.6552e-27	0.602259	0.263	0.021	1.33784e-22
MAP3K7	3.92169e-27	0.826297	0.545	0.112	1.43538e-22
ZEB1-AS1	4.04009e-27	0.944262	0.313	0.034	1.47871e-22
LAPTM4A	4.22683e-27	0.686122	0.465	0.078	1.54706e-22
MPZL1	4.43756e-27	0.860419	0.394	0.058	1.62419e-22
DPF3	4.84164e-27	-2.41781	0.141	0.7	1.77209e-22
AC005323.2	5.19126e-27	0.751783	0.172	0.005	1.90005e-22
SNX9	5.75376e-27	1.02428	0.687	0.181	2.10593e-22
CLMN	6.14552e-27	0.779569	0.374	0.05	2.24932e-22
PTPRM	7.52522e-27	-1.51871	0.596	0.905	2.7543e-22
CCNH	7.67452e-27	1.52741	0.788	0.289	2.80895e-22
AMOT	8.27407e-27	0.462945	0.202	0.009	3.02839e-22
SEPTIN11	8.72158e-27	0.863253	0.394	0.057	3.19218e-22
NR2F2-AS1	1.00885e-26	1.30723	0.485	0.093	3.69251e-22
SPARC	1.10324e-26	0.947394	0.596	0.132	4.03798e-22
FRZB	1.14097e-26	0.379698	0.162	0.003	4.17605e-22
PXK	1.16983e-26	0.782354	0.455	0.076	4.28169e-22
SPART	1.22524e-26	0.686285	0.424	0.066	4.48448e-22
NFE2L2	1.47813e-26	1.167	0.768	0.254	5.41009e-22
FGFR1OP2	1.54973e-26	0.873889	0.475	0.087	5.67216e-22
AC007336.1	1.65852e-26	0.409231	0.141	0.001	6.07035e-22
ADCY3	1.73934e-26	0.52197	0.242	0.017	6.36617e-22
PGM3	2.05998e-26	0.566003	0.283	0.027	7.53974e-22
SLC35F5	2.06779e-26	0.69443	0.545	0.111	7.56833e-22
DUSP6	2.20911e-26	0.677072	0.293	0.029	8.08556e-22
GNG12	2.46578e-26	1.06923	0.525	0.108	9.02499e-22
IFI16	2.89393e-26	0.854307	0.313	0.035	1.05921e-21
LRRK1	3.24195e-26	0.450654	0.242	0.017	1.18659e-21
MB21D2	3.51715e-26	0.920941	0.465	0.083	1.28731e-21
PARP8	3.52412e-26	0.948947	0.414	0.067	1.28986e-21
FER	3.75413e-26	1.36774	0.808	0.32	1.37405e-21
ZBTB20	4.31888e-26	1.00334	1	0.946	1.58075e-21
IQGAP1	4.78012e-26	1.19582	0.717	0.213	1.74957e-21
CMTM6	5.06687e-26	0.561702	0.303	0.032	1.85452e-21
NFASC	5.16211e-26	0.819266	0.394	0.059	1.88938e-21
IL6ST	5.36678e-26	1.18641	0.677	0.187	1.9643e-21
TSC22D2	5.41038e-26	1.83434	0.788	0.305	1.98025e-21
EPHX1	5.83668e-26	0.71144	0.394	0.058	2.13628e-21
TRAM1	6.32727e-26	0.550942	0.404	0.06	2.31584e-21
TMEM47	6.34146e-26	0.650162	0.374	0.052	2.32104e-21
TRIL	6.4011e-26	0.413349	0.222	0.014	2.34287e-21
MT-CYB	7.3704e-26	-1.25266	0.98	1	2.69764e-21
CDK14	7.63793e-26	1.32004	0.869	0.36	2.79556e-21
NECTIN3	7.8719e-26	0.911236	0.374	0.056	2.88119e-21
RARS2	8.28866e-26	0.911998	0.535	0.115	3.03373e-21
HIVEP2	9.11143e-26	1.63794	0.828	0.358	3.33488e-21
ATP2B1	9.71388e-26	1.03729	0.505	0.103	3.55538e-21
S1PR2	1.01503e-25	0.450563	0.202	0.01	3.71509e-21
PKDCC	1.0486e-25	0.74226	0.384	0.057	3.83798e-21
PLK3	1.16325e-25	0.520973	0.202	0.01	4.25763e-21
FERMT2	1.20148e-25	1.21686	0.697	0.214	4.39753e-21
RCN1	1.20192e-25	0.524074	0.303	0.032	4.39913e-21
ZNF430	1.24528e-25	0.492394	0.232	0.016	4.55786e-21
TRIM38	1.26445e-25	0.628039	0.273	0.025	4.62801e-21
CHIC2	1.28873e-25	0.89916	0.434	0.076	4.7169e-21
APOE	1.32923e-25	1.58177	0.394	0.065	4.86512e-21
EPHA6	1.46368e-25	1.8026	0.455	0.096	5.35722e-21
MXRA5	1.49298e-25	0.512004	0.232	0.016	5.46445e-21
CCNI	1.5118e-25	0.967463	0.657	0.17	5.53335e-21
RNF145	1.64341e-25	0.779873	0.545	0.116	6.01505e-21
MTUS2	1.78577e-25	-2.46503	0.091	0.667	6.5361e-21
SERTAD1	1.81292e-25	0.573162	0.253	0.021	6.63546e-21
BTG3	1.8496e-25	0.516925	0.263	0.023	6.76973e-21
NAALADL2	1.93522e-25	1.8669	0.788	0.388	7.08311e-21
TRPC1	2.04742e-25	1.17454	0.646	0.175	7.49376e-21
DICER1	2.06092e-25	0.889657	0.586	0.133	7.54317e-21
KMT2E	2.17723e-25	1.27359	0.808	0.327	7.96889e-21
CCDC191	2.23244e-25	0.523189	0.212	0.013	8.17096e-21
INTS6	2.75605e-25	1.52858	0.758	0.269	1.00874e-20
RNF152	2.85552e-25	1.68344	0.485	0.103	1.04515e-20
NLGN4X	2.99169e-25	1.04286	0.283	0.029	1.09499e-20
DDR2	3.18032e-25	1.16937	0.687	0.195	1.16403e-20
EEF1A1	3.3126e-25	1.05948	0.707	0.199	1.21244e-20
ITGB8	3.48513e-25	0.725897	0.222	0.015	1.27559e-20
DNAJB14	3.54309e-25	0.934571	0.465	0.089	1.29681e-20
HOOK3	3.62245e-25	0.907011	0.677	0.185	1.32585e-20
SRSF10	3.64971e-25	0.718234	0.475	0.089	1.33583e-20
KREMEN1	3.76084e-25	0.737416	0.354	0.049	1.3765e-20
TFG	3.94219e-25	0.792763	0.515	0.107	1.44288e-20
CPSF6	4.1611e-25	0.936404	0.616	0.159	1.523e-20
MARVELD1	4.49869e-25	0.365311	0.162	0.005	1.64657e-20
RPL28	4.53986e-25	0.948447	0.566	0.129	1.66163e-20
AC025809.1	4.57184e-25	0.386033	0.162	0.005	1.67334e-20
MYOZ2	4.75929e-25	-2.49999	0.141	0.669	1.74195e-20
EXTL2	4.79427e-25	0.6193	0.273	0.027	1.75475e-20
SPHKAP	4.80869e-25	-2.4692	0.111	0.671	1.76003e-20
PHACTR1	4.86275e-25	-2.26096	0.313	0.753	1.77982e-20
PAPLN	4.95561e-25	0.364954	0.162	0.005	1.8138e-20
ITGA8	5.64775e-25	0.785817	0.313	0.037	2.06713e-20
CCNL1	6.12002e-25	0.934388	0.505	0.104	2.23999e-20
COL28A1	6.13179e-25	1.1319	0.354	0.051	2.2443e-20
CRYBG3	6.7914e-25	1.02949	0.636	0.169	2.48572e-20
CTSO	8.1679e-25	0.480717	0.242	0.02	2.98953e-20
NCAM1	8.42911e-25	-2.17114	0.192	0.723	3.08514e-20
TNKS1BP1	9.62134e-25	0.434519	0.232	0.017	3.52151e-20
HNRNPH3	9.73391e-25	0.562923	0.485	0.09	3.56271e-20
FAM49A	9.92778e-25	0.821582	0.313	0.038	3.63367e-20
AC012459.1	1.03892e-24	0.53194	0.202	0.012	3.80257e-20
NAAA	1.05266e-24	0.573338	0.202	0.012	3.85285e-20
H1FX	1.11383e-24	0.572748	0.263	0.024	4.07675e-20
MT-ATP6	1.23447e-24	-1.15005	0.98	1	4.51827e-20
SRSF9	1.25004e-24	0.33209	0.182	0.008	4.57528e-20
DZIP1	1.34736e-24	0.45106	0.263	0.024	4.93147e-20
HSD17B11	1.35128e-24	0.400239	0.232	0.017	4.94581e-20
NFATC1	1.42737e-24	0.921894	0.414	0.072	5.22432e-20
CASK	1.4649e-24	1.07224	0.626	0.165	5.36166e-20
MMP19	1.46527e-24	0.659517	0.131	0.001	5.36303e-20
CCDC152	1.51596e-24	0.496615	0.141	0.002	5.54855e-20
CASQ2	1.60671e-24	-2.23996	0.131	0.667	5.88073e-20
TMOD2	1.63072e-24	0.448595	0.253	0.022	5.96858e-20
TMEM115	1.86573e-24	0.417698	0.182	0.008	6.82874e-20
NENF	1.91963e-24	0.384446	0.253	0.022	7.02605e-20
UBA6	1.94886e-24	0.741505	0.444	0.081	7.13304e-20
YIPF5	2.05276e-24	0.295424	0.202	0.012	7.51329e-20
LMO7	2.11749e-24	-2.08622	0.222	0.696	7.75021e-20
HNRNPK	2.38768e-24	0.665731	0.586	0.134	8.73914e-20
NIBAN1	2.42864e-24	-1.85349	0.475	0.812	8.88907e-20
VGLL3	2.48112e-24	0.921086	0.242	0.021	9.08115e-20
SRSF5	2.64313e-24	0.966843	0.646	0.174	9.67412e-20
OXR1	2.7165e-24	1.09149	0.556	0.136	9.94267e-20
TSC22D3	2.80065e-24	0.924923	0.404	0.068	1.02506e-19
HNRNPA3	3.19679e-24	0.799745	0.626	0.158	1.17006e-19
FXYD6	3.28548e-24	0.875611	0.374	0.058	1.20252e-19
TNS2	3.52683e-24	0.585701	0.364	0.053	1.29085e-19
COPA	3.66478e-24	1.03579	0.576	0.144	1.34134e-19
APLNR	3.71846e-24	0.586603	0.273	0.028	1.361e-19
TWIST2	4.07089e-24	0.681692	0.172	0.007	1.48999e-19
FHIT	4.13331e-24	-1.79181	0.424	0.823	1.51283e-19
SMIM3	4.15366e-24	0.658535	0.273	0.028	1.52028e-19
SLC66A3	4.19283e-24	0.336218	0.172	0.007	1.53462e-19
KPNB1	4.43818e-24	0.770207	0.475	0.095	1.62442e-19
HYMAI	4.64881e-24	0.558558	0.172	0.007	1.70151e-19
FCHO2	4.65494e-24	1.03579	0.566	0.137	1.70376e-19
SVIL	5.09623e-24	-1.33213	0.727	0.898	1.86527e-19
SRGAP2C	5.1088e-24	0.388791	0.222	0.016	1.86987e-19
LMNA	5.3177e-24	1.74716	0.697	0.243	1.94633e-19
GLI3	5.56994e-24	0.896308	0.505	0.109	2.03866e-19
USP11	5.6584e-24	0.453701	0.263	0.025	2.07103e-19
DENND4A	5.68701e-24	1.14016	0.687	0.213	2.0815e-19
ZC2HC1A	5.80623e-24	0.624834	0.283	0.031	2.12514e-19
C11orf80	6.08213e-24	0.70817	0.263	0.025	2.22612e-19
SERTAD2	6.16907e-24	0.759897	0.354	0.051	2.25794e-19
ITPRIPL2	6.39759e-24	0.453306	0.222	0.016	2.34158e-19
ZNF83	6.46365e-24	0.857257	0.424	0.075	2.36576e-19
SESN3	6.60497e-24	0.509945	0.263	0.025	2.41749e-19
EDEM3	6.86723e-24	0.81517	0.444	0.085	2.51348e-19
DIO2	7.76768e-24	0.774465	0.263	0.027	2.84305e-19
SF3B1	7.82255e-24	0.791179	0.566	0.131	2.86313e-19
SPAG9	8.07082e-24	1.221	0.828	0.333	2.954e-19
MYOM3	8.65393e-24	-2.01428	0.172	0.713	3.16743e-19
PPT1	8.93754e-24	0.422224	0.253	0.023	3.27123e-19
FAM3C	9.11616e-24	0.682673	0.364	0.054	3.33661e-19
BCLAF1	9.41121e-24	0.871152	0.616	0.155	3.4446e-19
DOCK11	9.43285e-24	0.712705	0.313	0.039	3.45252e-19
AC022034.3	1.00819e-23	-2.64087	0.121	0.649	3.69009e-19
IDS	1.02231e-23	0.652945	0.495	0.101	3.74174e-19
KPNA5	1.05594e-23	0.731299	0.364	0.056	3.86486e-19
RASSF8	1.06199e-23	1.14075	0.525	0.123	3.887e-19
PDE1C	1.11088e-23	-1.47158	0.687	0.885	4.06593e-19
MKLN1	1.18469e-23	1.12379	0.919	0.438	4.33608e-19
SUCO	1.19595e-23	0.760118	0.465	0.09	4.3773e-19
ZC3H14	1.2027e-23	0.644308	0.434	0.08	4.40199e-19
ARAP2	1.30449e-23	0.652087	0.283	0.031	4.77457e-19
PKNOX2	1.42856e-23	0.986452	0.495	0.108	5.22866e-19
AC105285.1	1.52458e-23	0.62304	0.212	0.015	5.5801e-19
TNFAIP6	1.58344e-23	1.19259	0.232	0.02	5.79554e-19
ZNF654	1.5844e-23	1.0407	0.576	0.152	5.79907e-19
ALDH1A1	1.62638e-23	0.654082	0.283	0.031	5.95271e-19
DOCK6	1.63578e-23	0.687588	0.354	0.052	5.98713e-19
AL133346.1	1.69067e-23	0.808283	0.222	0.017	6.18801e-19
ADRA1B	1.74058e-23	0.682222	0.263	0.027	6.37068e-19
SETD5	2.02993e-23	1.18859	0.838	0.345	7.42976e-19
SERINC3	2.18543e-23	0.569621	0.384	0.063	7.9989e-19
LINC01138	2.1875e-23	0.529624	0.212	0.015	8.00646e-19
MAGI2-AS3	2.22283e-23	0.743811	0.475	0.097	8.13578e-19
FUBP1	2.3239e-23	0.883119	0.576	0.144	8.50571e-19
NORAD	2.45264e-23	0.634528	0.444	0.083	8.97689e-19
HNRNPH1	2.50217e-23	0.875101	0.707	0.205	9.1582e-19
PCDH7	2.5745e-23	-1.91642	0.434	0.819	9.42291e-19
PIK3CA	2.63771e-23	0.958314	0.485	0.107	9.65428e-19
TMBIM6	2.64575e-23	0.799404	0.525	0.117	9.68371e-19
CERCAM	2.65145e-23	0.48793	0.222	0.017	9.70458e-19
CERS6	2.71226e-23	-2.15786	0.172	0.665	9.92714e-19
GDI2	3.18404e-23	0.605169	0.455	0.087	1.16539e-18
RAB34	3.18843e-23	0.289155	0.182	0.009	1.167e-18
CYGB	3.20157e-23	0.469083	0.273	0.029	1.17181e-18
RO60	3.23535e-23	0.615832	0.414	0.073	1.18417e-18
TMSB4X	3.33246e-23	0.851599	0.616	0.156	1.21972e-18
CNTRL	3.50413e-23	0.737171	0.313	0.042	1.28255e-18
ZNF703	3.59836e-23	0.347965	0.152	0.005	1.31703e-18
KIAA1109	3.68893e-23	1.05552	0.707	0.22	1.35018e-18
RADIL	3.76337e-23	0.529787	0.232	0.02	1.37743e-18
TPM4	3.85059e-23	0.585528	0.465	0.089	1.40936e-18
RAB6A	4.39237e-23	0.960393	0.545	0.131	1.60765e-18
SCD5	4.49062e-23	0.473266	0.232	0.02	1.64361e-18
LYST	5.08759e-23	0.813834	0.566	0.138	1.86211e-18
STXBP5	5.15406e-23	1.21346	0.667	0.216	1.88644e-18
EIF1	5.54326e-23	0.681991	0.606	0.146	2.02889e-18
RPL14	5.96316e-23	0.709359	0.434	0.08	2.18258e-18
WASF3	6.00354e-23	0.516553	0.323	0.044	2.19736e-18
ATXN3	6.15776e-23	0.841345	0.495	0.109	2.2538e-18
PIP5K1B	6.19299e-23	-2.28806	0.061	0.604	2.2667e-18
PCYOX1	6.41713e-23	0.599461	0.384	0.064	2.34873e-18
SMARCA5	6.5505e-23	0.726952	0.465	0.092	2.39755e-18
POU2F1	7.09855e-23	0.983435	0.727	0.228	2.59814e-18
METTL7A	7.2058e-23	0.636837	0.293	0.036	2.6374e-18
CAB39L	7.24757e-23	1.18008	0.455	0.095	2.65268e-18
RCBTB2	7.86565e-23	0.609212	0.364	0.057	2.87891e-18
PRTFDC1	9.26141e-23	0.531147	0.263	0.028	3.38977e-18
ZRANB2	9.33885e-23	0.823906	0.657	0.182	3.41811e-18
TBK1	1.03038e-22	0.596477	0.343	0.051	3.77129e-18
CYP7B1	1.09693e-22	1.39547	0.374	0.067	4.01488e-18
ACVR1B	1.11352e-22	0.432759	0.313	0.041	4.07559e-18
AC092535.4	1.16122e-22	0.480674	0.131	0.002	4.25017e-18
PTP4A2	1.22353e-22	0.717915	0.545	0.125	4.47826e-18
PDZD2	1.25916e-22	-1.46123	0.687	0.854	4.60865e-18
GLIPR2	1.32356e-22	0.439286	0.202	0.014	4.84435e-18
APBA1	1.43323e-22	0.75635	0.384	0.065	5.24577e-18
FIBIN	1.49444e-22	0.404713	0.202	0.014	5.46981e-18
SSPN	1.49809e-22	0.762359	0.414	0.078	5.48317e-18
NBEAL1	1.52873e-22	1.13651	0.808	0.315	5.59532e-18
LEMD3	1.56847e-22	0.876982	0.515	0.118	5.74074e-18
SUMO2	1.89082e-22	0.468009	0.374	0.059	6.92059e-18
UHRF1BP1L	2.08051e-22	0.843643	0.404	0.075	7.61486e-18
TRHDE	2.11369e-22	0.798075	0.182	0.01	7.73632e-18
COPB1	2.18943e-22	0.696998	0.424	0.08	8.01353e-18
MVP	2.22658e-22	0.52359	0.273	0.031	8.14949e-18
CDK9	2.26805e-22	0.463171	0.162	0.007	8.30129e-18
ARIH1	2.39954e-22	1.26336	0.869	0.397	8.78255e-18
HSPB7	2.52877e-22	-2.05725	0.152	0.654	9.25555e-18
EHD2	2.69564e-22	0.511755	0.404	0.071	9.86631e-18
FAT4	2.71125e-22	1.23979	0.525	0.136	9.92344e-18
PMS1	2.7609e-22	0.63119	0.333	0.05	1.01052e-17
APOD	2.76463e-22	2.09882	0.697	0.258	1.01188e-17
ADAM33	2.78446e-22	0.484865	0.222	0.019	1.01914e-17
ARF4	2.86387e-22	0.792392	0.495	0.109	1.0482e-17
ADGRA2	2.88088e-22	0.45014	0.242	0.023	1.05443e-17
JUND	2.90873e-22	1.0893	0.717	0.231	1.06462e-17
SMIM13	2.93335e-22	0.345335	0.182	0.01	1.07363e-17
GNB1	3.00102e-22	1.0353	0.727	0.233	1.0984e-17
REM1	3.11848e-22	0.421367	0.162	0.007	1.1414e-17
MT-ND5	3.15331e-22	-1.36393	0.717	0.948	1.15414e-17
EFCAB13	3.37685e-22	0.683683	0.242	0.024	1.23596e-17
ARHGDIA	3.45332e-22	0.439125	0.283	0.034	1.26395e-17
LGR4	3.45768e-22	1.33766	0.586	0.165	1.26554e-17
MICAL3	3.50878e-22	-1.94923	0.333	0.721	1.28425e-17
FAM171B	3.55129e-22	0.327615	0.162	0.007	1.29981e-17
CCDC14	3.80105e-22	0.844826	0.404	0.078	1.39122e-17
TMEM39A	4.02152e-22	0.433884	0.273	0.031	1.47192e-17
EGR3	4.02224e-22	1.23015	0.444	0.095	1.47218e-17
ITGA11	4.14977e-22	0.756454	0.293	0.038	1.51886e-17
ST3GAL5	4.53643e-22	0.58374	0.192	0.013	1.66038e-17
PAN3	4.68955e-22	1.16928	0.677	0.219	1.71642e-17
ZFPM2-AS1	4.93698e-22	0.891597	0.374	0.065	1.80698e-17
PRKG1	5.1335e-22	1.03926	0.98	0.924	1.87891e-17
FAS	5.59762e-22	0.424771	0.192	0.013	2.04878e-17
NLGN1	5.80945e-22	-1.90918	0.313	0.757	2.12632e-17
AC025159.1	5.84526e-22	1.20787	0.283	0.037	2.13942e-17
RNASE4	6.5717e-22	0.355545	0.192	0.013	2.40531e-17
ANKRD44	6.8878e-22	0.834789	0.556	0.137	2.521e-17
ARFGAP3	7.06893e-22	0.913401	0.485	0.11	2.5873e-17
CTSF	7.24768e-22	0.581967	0.273	0.032	2.65272e-17
ILK	7.26061e-22	0.506687	0.374	0.063	2.65745e-17
FAM133B	7.2739e-22	0.671229	0.596	0.154	2.66232e-17
EML4	7.44357e-22	1.05279	0.475	0.109	2.72442e-17
TPRG1	7.56806e-22	0.977728	0.303	0.043	2.76999e-17
EVI5	7.76563e-22	1.02541	0.808	0.313	2.8423e-17
TNFSF13B	7.90341e-22	0.537888	0.202	0.015	2.89273e-17
SH3BGRL3	8.36462e-22	0.556497	0.283	0.035	3.06154e-17
GGT5	8.38628e-22	0.51769	0.253	0.027	3.06946e-17
UVRAG	8.82342e-22	0.996845	0.747	0.247	3.22946e-17
LINC01004	9.03931e-22	1.10671	0.636	0.197	3.30848e-17
C11orf96	9.27031e-22	0.957522	0.293	0.039	3.39303e-17
LRRN4CL	1.02533e-21	0.243265	0.152	0.006	3.75281e-17
KLF10	1.08581e-21	0.461977	0.242	0.024	3.97416e-17
SLC40A1	1.16093e-21	0.656526	0.293	0.038	4.24914e-17
CD44	1.16357e-21	0.702066	0.263	0.03	4.25879e-17
HDX	1.25475e-21	0.682315	0.273	0.034	4.59251e-17
ZC3HAV1	1.33335e-21	0.777598	0.333	0.052	4.88018e-17
ANKRD36	1.33769e-21	0.747806	0.515	0.121	4.89609e-17
HNRNPR	1.38684e-21	0.756572	0.394	0.074	5.07598e-17
PRKD1	1.4475e-21	1.14796	0.495	0.124	5.29801e-17
PROCR	1.48565e-21	0.481207	0.222	0.02	5.43763e-17
CYP4X1	1.57785e-21	0.411153	0.172	0.009	5.77511e-17
NBPF11	1.58481e-21	0.328624	0.222	0.02	5.80058e-17
SFT2D2	1.81265e-21	0.468867	0.283	0.035	6.63448e-17
KDM5B	2.02798e-21	0.654799	0.434	0.088	7.42262e-17
STAM2	2.08175e-21	0.678669	0.424	0.083	7.61943e-17
METTL8	2.10217e-21	0.519617	0.263	0.03	7.69417e-17
CAMK2N1	2.12776e-21	0.542369	0.273	0.032	7.7878e-17
GPR153	2.34215e-21	0.353923	0.141	0.005	8.57249e-17
CD46	2.38636e-21	0.649425	0.495	0.111	8.73433e-17
RAB22A	2.70896e-21	0.720967	0.354	0.06	9.91507e-17
XAF1	2.77801e-21	0.623399	0.354	0.058	1.01678e-16
TM9SF3	2.86397e-21	0.782599	0.616	0.17	1.04824e-16
SLCO2B1	2.97479e-21	0.512599	0.283	0.036	1.0888e-16
WIPF1	3.08548e-21	1.04385	0.525	0.141	1.12932e-16
AGPAT4	3.38223e-21	0.584387	0.222	0.021	1.23793e-16
KLHL42	3.40294e-21	0.506222	0.253	0.028	1.24551e-16
TOR1AIP1	3.41604e-21	0.632882	0.495	0.112	1.2503e-16
CD47	3.54202e-21	0.596428	0.414	0.078	1.29641e-16
RAC1	3.82602e-21	0.582755	0.414	0.08	1.40036e-16
TACC1	3.91006e-21	1.17705	0.687	0.228	1.43112e-16
SPAAR	4.01784e-21	0.477393	0.242	0.025	1.47057e-16
EIF1AX	4.11416e-21	0.593849	0.424	0.085	1.50583e-16
AL445426.1	4.24929e-21	0.564016	0.192	0.014	1.55528e-16
EDNRB	4.41852e-21	0.834833	0.303	0.043	1.61722e-16
TANC2	4.6214e-21	1.06691	0.394	0.079	1.69148e-16
BDH2	4.70813e-21	0.362566	0.162	0.008	1.72322e-16
LRP1	5.45988e-21	0.913303	0.576	0.16	1.99837e-16
TCEAL9	5.60901e-21	0.405476	0.212	0.019	2.05295e-16
HTRA3	5.67295e-21	1.04268	0.596	0.169	2.07635e-16
GUCY1B1	6.19965e-21	0.76078	0.343	0.058	2.26913e-16
GPX8	6.2573e-21	0.335404	0.131	0.003	2.29023e-16
SPRY4-AS1	6.32379e-21	0.444475	0.232	0.023	2.31457e-16
CCDC18-AS1	6.61111e-21	1.0623	0.596	0.175	2.41973e-16
ALG13	7.01958e-21	0.768843	0.465	0.105	2.56924e-16
RPL18	8.3196e-21	0.68171	0.394	0.075	3.04506e-16
PCDH9	8.44473e-21	1.49475	0.919	0.74	3.09085e-16
PRICKLE2	8.81633e-21	1.1634	0.495	0.124	3.22687e-16
ACSM1	8.90257e-21	0.274189	0.121	0.002	3.25843e-16
SCARB2	9.12886e-21	0.567465	0.414	0.08	3.34125e-16
CYB5R4	9.83365e-21	0.600346	0.323	0.05	3.59921e-16
FGF10-AS1	9.8819e-21	0.55739	0.121	0.002	3.61687e-16
ADA	1.02726e-20	0.482123	0.172	0.01	3.75986e-16
SUSD2	1.05932e-20	0.287049	0.121	0.002	3.87722e-16
AL138756.1	1.07788e-20	0.287854	0.121	0.002	3.94516e-16
ACTR3	1.13044e-20	0.793769	0.475	0.11	4.13753e-16
KYAT3	1.13958e-20	0.694653	0.232	0.024	4.17097e-16
OSR2	1.17417e-20	0.245594	0.111	0.001	4.29757e-16
NCOA5	1.22184e-20	0.620892	0.293	0.041	4.47207e-16
ROCK2	1.29655e-20	0.994206	0.737	0.271	4.74551e-16
SPON2	1.36146e-20	0.567303	0.293	0.041	4.98309e-16
KHDRBS1	1.41703e-20	0.862556	0.576	0.16	5.18646e-16
TRA2B	1.43143e-20	0.941566	0.727	0.246	5.23918e-16
PTPRS	1.54433e-20	0.850267	0.576	0.154	5.6524e-16
IGFBP5	1.56025e-20	1.1954	0.505	0.129	5.71067e-16
MT-ND2	1.64854e-20	-0.98789	0.98	1	6.03381e-16
SLC16A4	1.6857e-20	0.376483	0.152	0.007	6.16982e-16
BMP2	1.6857e-20	0.502645	0.152	0.007	6.16982e-16
DLK1	1.7e-20	1.68917	0.444	0.109	6.22217e-16
MAST4	1.73803e-20	-1.49529	0.556	0.82	6.36135e-16
PON3	1.75884e-20	0.53518	0.152	0.007	6.43753e-16
DOK6	1.89861e-20	1.28549	0.545	0.155	6.94912e-16
AKAP13	1.90878e-20	-0.925151	0.98	0.962	6.98633e-16
DOCK1	2.01146e-20	1.18309	0.808	0.326	7.36213e-16
JAM3	2.03844e-20	0.87006	0.323	0.053	7.46088e-16
STAT6	2.09985e-20	0.463673	0.212	0.02	7.68566e-16
C6orf62	2.10336e-20	0.707467	0.495	0.116	7.6985e-16
GOLPH3	2.14326e-20	0.921071	0.576	0.162	7.84456e-16
CYP4B1	2.33656e-20	0.492373	0.182	0.013	8.55205e-16
GALNT10	2.38109e-20	0.921335	0.414	0.089	8.71501e-16
AGFG1	2.44541e-20	0.692106	0.525	0.132	8.95046e-16
FRY	2.4753e-20	-1.39679	0.586	0.839	9.05984e-16
NUMBL	2.50646e-20	0.436185	0.222	0.022	9.1739e-16
AC108734.4	2.64908e-20	0.604054	0.192	0.015	9.69589e-16
LINC00342	2.67881e-20	0.691488	0.495	0.117	9.80471e-16
SENP2	2.70788e-20	0.647399	0.414	0.083	9.91111e-16
NUP58	2.80695e-20	0.742125	0.374	0.071	1.02737e-15
RPS19	2.99151e-20	0.692578	0.485	0.111	1.09492e-15
TVP23C	3.29182e-20	0.707575	0.384	0.074	1.20484e-15
RUSC1	3.43379e-20	0.301782	0.182	0.013	1.2568e-15
ANKAR	3.57957e-20	0.829952	0.444	0.102	1.31016e-15
TGFB1I1	3.63247e-20	0.476088	0.202	0.017	1.32952e-15
CLINT1	3.64855e-20	0.832462	0.434	0.096	1.33541e-15
LDLR	3.75959e-20	0.842211	0.242	0.028	1.37605e-15
PPP4R3B	3.81148e-20	0.570667	0.444	0.096	1.39504e-15
SPARCL1	4.45715e-20	1.32568	0.808	0.393	1.63136e-15
AP2B1	4.52497e-20	0.768284	0.556	0.148	1.65618e-15
RBMS1	4.57729e-20	1.13428	0.939	0.629	1.67533e-15
EVA1B	4.58834e-20	0.309302	0.192	0.015	1.67938e-15
RDH11	4.63195e-20	0.332245	0.212	0.02	1.69534e-15
TMEM144	4.7475e-20	1.03956	0.495	0.132	1.73763e-15
WASF2	4.78873e-20	0.665501	0.616	0.173	1.75272e-15
SRGAP2	4.83828e-20	0.657397	0.283	0.039	1.77086e-15
DYNC1I2	5.07903e-20	0.580851	0.465	0.103	1.85898e-15
TMEM98	5.65617e-20	0.430489	0.162	0.009	2.07022e-15
YIF1A	5.99246e-20	0.320168	0.141	0.006	2.1933e-15
IQCB1	6.04272e-20	0.770376	0.354	0.065	2.2117e-15
TPGS2	6.06944e-20	0.290321	0.202	0.017	2.22147e-15
NBPF26	6.26181e-20	0.284281	0.141	0.006	2.29188e-15
MRFAP1	6.5207e-20	0.308788	0.283	0.038	2.38664e-15
BAZ2A	6.61098e-20	0.533419	0.475	0.107	2.41968e-15
SPTLC1	7.47828e-20	0.466285	0.333	0.054	2.73712e-15
RANBP2	7.52361e-20	0.607335	0.535	0.132	2.75372e-15
RAB3GAP2	7.60224e-20	0.779375	0.545	0.145	2.7825e-15
MT-CO3	7.70899e-20	-1.04521	0.99	1	2.82157e-15
RPS27	7.72498e-20	0.704933	0.636	0.18	2.82742e-15
HNRNPU	8.24463e-20	0.967775	0.788	0.311	3.01762e-15
DMTF1	8.38258e-20	0.85631	0.525	0.141	3.06811e-15
GNB5	8.43245e-20	0.524122	0.172	0.012	3.08636e-15
EMP3	8.85758e-20	0.55659	0.172	0.012	3.24196e-15
PKP2	9.53777e-20	-1.96461	0.212	0.632	3.49092e-15
EXOC1	9.6087e-20	0.626425	0.354	0.064	3.51688e-15
FNDC1	1.00811e-19	0.503836	0.263	0.034	3.68977e-15
FAR1	1.01382e-19	0.697083	0.515	0.131	3.71067e-15
NID2	1.06922e-19	0.811105	0.434	0.096	3.91345e-15
ZNF706	1.08905e-19	0.749343	0.404	0.085	3.98604e-15
QKI	1.14471e-19	-1.05174	0.919	0.932	4.18976e-15
ATL3	1.2176e-19	0.385235	0.283	0.039	4.45656e-15
PLBD2	1.24539e-19	0.692115	0.323	0.053	4.55827e-15
TUG1	1.2508e-19	0.592375	0.354	0.065	4.57804e-15
TCP11L1	1.2609e-19	0.488007	0.253	0.031	4.61501e-15
NECTIN2	1.30243e-19	0.683292	0.424	0.09	4.76704e-15
SSC5D	1.30369e-19	0.488077	0.232	0.025	4.77162e-15
GPRC5A	1.37512e-19	0.771009	0.152	0.008	5.03306e-15
MED17	1.39523e-19	0.514421	0.313	0.05	5.10667e-15
CHRD	1.40969e-19	0.390868	0.131	0.005	5.15959e-15
ACSL3	1.4808e-19	0.881784	0.566	0.156	5.41988e-15
LINC01505	1.48332e-19	-2.06082	0.111	0.594	5.42911e-15
ERRFI1	1.53542e-19	1.0105	0.273	0.039	5.61979e-15
OPHN1	1.53645e-19	0.923826	0.657	0.209	5.62354e-15
ARHGEF26	1.54625e-19	0.703427	0.202	0.019	5.65944e-15
NFIA	1.54953e-19	0.987203	0.97	0.786	5.67143e-15
RASA1	1.65447e-19	1.00969	0.606	0.19	6.05554e-15
PNRC2	1.65772e-19	0.491171	0.273	0.037	6.06743e-15
KDELR2	1.6845e-19	0.339083	0.263	0.034	6.16546e-15
DCUN1D4	1.70093e-19	0.864583	0.485	0.121	6.22558e-15
SEPTIN2	1.71767e-19	0.705167	0.626	0.178	6.28686e-15
UAP1	1.91143e-19	0.994453	0.303	0.048	6.99602e-15
TEP1	1.91191e-19	0.464883	0.202	0.019	6.99779e-15
PANX1	1.95393e-19	0.346651	0.182	0.014	7.15157e-15
SNX33	1.97903e-19	0.37779	0.152	0.008	7.24344e-15
CBFB	2.11653e-19	0.897145	0.455	0.112	7.74671e-15
SPSB1	2.1409e-19	0.768074	0.273	0.038	7.8359e-15
H3F3B	2.17849e-19	0.617633	0.404	0.082	7.97349e-15
OAT	2.19415e-19	0.360561	0.202	0.019	8.03079e-15
SELENOM	2.2102e-19	0.375393	0.253	0.031	8.08957e-15
CNOT4	2.25395e-19	0.852525	0.707	0.235	8.24967e-15
BLZF1	2.31051e-19	0.376098	0.253	0.031	8.45671e-15
PPARGC1A	2.34878e-19	-2.13409	0.202	0.618	8.59677e-15
SLC36A4	2.41567e-19	0.712443	0.283	0.042	8.84159e-15
LINC01151	2.5175e-19	-2.36482	0.121	0.583	9.21429e-15
RIF1	2.62244e-19	0.670329	0.475	0.114	9.59841e-15
WHRN	2.62396e-19	0.313623	0.152	0.008	9.60396e-15
TGFBR3	2.62523e-19	0.923562	0.717	0.248	9.60859e-15
KIAA0408	2.69528e-19	0.327998	0.152	0.008	9.86498e-15
CNBD1	2.75568e-19	0.761317	0.222	0.024	1.00861e-14
WNK2	2.76707e-19	-1.99803	0.121	0.584	1.01278e-14
ACTA1	2.78496e-19	-2.0473	0.141	0.596	1.01932e-14
CEP57	2.7857e-19	0.550334	0.354	0.064	1.01959e-14
VPS26A	3.05252e-19	0.639564	0.354	0.065	1.11725e-14
LRP6	3.34331e-19	0.750655	0.455	0.109	1.22369e-14
CCDC141	3.69148e-19	-1.94344	0.141	0.598	1.35112e-14
SMAD3	3.72118e-19	1.04255	0.566	0.168	1.36199e-14
LARP6	3.72363e-19	0.626088	0.253	0.032	1.36288e-14
NUMB	3.80518e-19	0.824874	0.646	0.196	1.39274e-14
ROR2	3.8102e-19	0.502574	0.242	0.029	1.39457e-14
NT5E	3.92377e-19	0.386641	0.121	0.003	1.43614e-14
DAP	3.95497e-19	0.51236	0.354	0.065	1.44756e-14
KDELR1	4.05995e-19	0.335583	0.242	0.029	1.48598e-14
AC021698.1	4.11792e-19	0.332093	0.121	0.003	1.5072e-14
SMURF1	4.1276e-19	0.857819	0.586	0.17	1.51074e-14
PIWIL4	4.22048e-19	0.470872	0.162	0.01	1.54474e-14
ZCCHC24	4.23756e-19	0.598581	0.364	0.07	1.55099e-14
ITGB1BP1	4.25382e-19	0.447375	0.293	0.044	1.55694e-14
ELF2	4.4452e-19	1.10157	0.727	0.29	1.62699e-14
SLC1A5	4.4628e-19	0.255689	0.121	0.003	1.63343e-14
SLC66A1L	4.60708e-19	0.530431	0.162	0.01	1.68624e-14
FARP2	4.63155e-19	0.873244	0.444	0.105	1.6952e-14
AGO2	4.94393e-19	0.706243	0.586	0.169	1.80953e-14
CAP1	5.08578e-19	0.573885	0.333	0.059	1.86145e-14
LAMP1	5.0942e-19	0.636246	0.384	0.076	1.86453e-14
ARPC5	5.44689e-19	0.378599	0.232	0.027	1.99362e-14
H3F3A	5.70473e-19	0.627383	0.404	0.085	2.08799e-14
DNM3OS	7.18512e-19	0.363989	0.172	0.013	2.62982e-14
ITM2C	7.31057e-19	0.305646	0.162	0.01	2.67574e-14
KIAA1217	7.39483e-19	-1.70131	0.354	0.716	2.70658e-14
ITPR1	7.60373e-19	1.05432	0.768	0.312	2.78304e-14
RBMS2	7.97187e-19	0.689024	0.404	0.085	2.91778e-14
Z83843.1	8.05425e-19	0.623057	0.354	0.067	2.94794e-14
SIRT1	8.47291e-19	0.560082	0.343	0.063	3.10117e-14
SLFN13	8.50687e-19	0.207161	0.101	0.001	3.1136e-14
AL121839.2	8.51423e-19	0.252231	0.111	0.002	3.11629e-14
GOLM1	8.84449e-19	0.34579	0.141	0.007	3.23717e-14
C11orf58	8.89597e-19	0.659354	0.444	0.102	3.25601e-14
ENG	9.90683e-19	0.655202	0.495	0.123	3.626e-14
ARID4B	1.00399e-18	1.03062	0.737	0.286	3.67471e-14
OR2A1-AS1	1.00543e-18	0.232242	0.101	0.001	3.67997e-14
LINC00968	1.00543e-18	0.307067	0.101	0.001	3.67997e-14
AL139317.5	1.0142e-18	0.640662	0.242	0.031	3.71206e-14
RELA	1.07138e-18	0.39047	0.172	0.013	3.92136e-14
IFITM3	1.07662e-18	0.531654	0.515	0.13	3.94055e-14
PDXDC1	1.09353e-18	0.753756	0.455	0.111	4.00242e-14
DHX9	1.09743e-18	0.671904	0.384	0.079	4.01669e-14
PLEKHG2	1.14896e-18	0.469232	0.182	0.015	4.20531e-14
BTG1	1.1616e-18	0.307733	0.253	0.032	4.25156e-14
ARPC2	1.19884e-18	0.719558	0.515	0.136	4.38789e-14
FSHR	1.2148e-18	0.589926	0.182	0.015	4.44629e-14
BAG5	1.22841e-18	0.405756	0.182	0.015	4.49609e-14
FAM8A1	1.23644e-18	0.405595	0.202	0.02	4.52551e-14
TFE3	1.25526e-18	0.363582	0.192	0.017	4.59439e-14
HSPG2	1.3003e-18	1.09907	0.788	0.377	4.75921e-14
CYS1	1.35237e-18	0.355684	0.192	0.017	4.94982e-14
TMF1	1.35563e-18	0.571586	0.313	0.052	4.96174e-14
ADPRHL1	1.36512e-18	-1.91998	0.101	0.562	4.99647e-14
ADIRF	1.39194e-18	0.294127	0.253	0.032	5.09465e-14
TMEM241	1.47373e-18	0.710111	0.293	0.046	5.39401e-14
UBE2Q2	1.51472e-18	0.798739	0.303	0.051	5.54404e-14
GRAMD1B	1.58799e-18	-2.05925	0.222	0.63	5.81219e-14
PJA2	1.67579e-18	0.685883	0.535	0.146	6.13357e-14
ETS1	1.69451e-18	0.753904	0.495	0.125	6.20208e-14
FAM172A	1.69621e-18	1.17778	0.808	0.392	6.20831e-14
TUBA1A	1.73348e-18	0.64704	0.374	0.075	6.34473e-14
GASK1B	1.75849e-18	0.638308	0.434	0.1	6.43626e-14
NR2F2	1.77779e-18	0.31613	0.212	0.022	6.50688e-14
SPTSSA	1.81237e-18	0.301714	0.182	0.015	6.63344e-14
TEAD3	1.82533e-18	0.488423	0.323	0.056	6.68087e-14
TBC1D23	1.84681e-18	0.771879	0.424	0.1	6.7595e-14
KLF9	1.84804e-18	0.671652	0.495	0.124	6.764e-14
ITM2B	1.85151e-18	1.05254	0.687	0.251	6.77671e-14
FBXO40	1.87012e-18	-1.91985	0.141	0.591	6.84484e-14
PRKRA	1.87348e-18	0.649714	0.293	0.048	6.85711e-14
MON1B	1.96089e-18	0.246281	0.192	0.017	7.17705e-14
ATF6	1.98459e-18	0.852716	0.596	0.183	7.26378e-14
RPS14	2.02792e-18	0.544298	0.424	0.095	7.42241e-14
NUTM2B-AS1	2.04371e-18	0.907585	0.646	0.213	7.48017e-14
ANOS1	2.16471e-18	0.554402	0.313	0.053	7.92306e-14
KAZN	2.19702e-18	2.32635	0.434	0.118	8.04132e-14
BTF3	2.21772e-18	0.292251	0.293	0.045	8.11709e-14
BIRC2	2.33598e-18	0.504552	0.323	0.057	8.54992e-14
PTMA	2.3852e-18	0.770455	0.515	0.138	8.73008e-14
ATP6AP2	2.53749e-18	0.374222	0.253	0.034	9.28746e-14
GLUL	2.54283e-18	0.900887	0.465	0.118	9.30702e-14
RAI14	2.57599e-18	0.662769	0.283	0.044	9.42838e-14
KMT2C	2.67695e-18	1.08646	0.879	0.462	9.7979e-14
AP002495.1	2.73162e-18	0.390994	0.212	0.023	9.998e-14
SRL	2.7365e-18	-1.98148	0.141	0.581	1.00159e-13
GCC2	2.78559e-18	0.788262	0.455	0.112	1.01955e-13
MED13L	2.80925e-18	1.02867	0.899	0.492	1.02821e-13
ZFC3H1	2.89567e-18	0.684048	0.626	0.19	1.05984e-13
RAB11A	3.08917e-18	0.550491	0.343	0.065	1.13067e-13
SOAT1	3.12552e-18	0.526879	0.273	0.041	1.14397e-13
IPO9-AS1	3.26451e-18	0.414663	0.273	0.041	1.19484e-13
FAP	3.40837e-18	0.467786	0.131	0.006	1.2475e-13
BIN3	3.47411e-18	0.433306	0.283	0.043	1.27156e-13
RSRC1	3.55595e-18	1.01478	0.525	0.151	1.30151e-13
KCTD9	3.55784e-18	0.642626	0.394	0.085	1.30221e-13
SLC16A12	3.61989e-18	1.21522	0.364	0.076	1.32492e-13
AMPH	3.63373e-18	0.465795	0.222	0.025	1.32998e-13
TNNT1	3.65537e-18	-2.06415	0.091	0.552	1.3379e-13
SEC24B	3.78659e-18	0.706817	0.586	0.174	1.38593e-13
FST	3.87727e-18	0.308746	0.131	0.006	1.41912e-13
PRKAA1	3.9328e-18	0.675497	0.404	0.09	1.43944e-13
DLG1	3.95459e-18	0.964799	0.778	0.322	1.44742e-13
CHD1	4.10622e-18	1.07036	0.596	0.197	1.50292e-13
STXBP3	4.35935e-18	0.553975	0.364	0.073	1.59556e-13
AP001347.1	4.44793e-18	0.811825	0.242	0.034	1.62799e-13
AP002026.1	4.51139e-18	0.554871	0.192	0.019	1.65122e-13
PCSK5	4.51382e-18	0.875068	0.495	0.137	1.6521e-13
IRAK3	4.57707e-18	0.858643	0.323	0.059	1.67525e-13
MCUB	5.03131e-18	0.628062	0.182	0.016	1.84151e-13
DRAM1	5.09948e-18	0.521809	0.202	0.021	1.86646e-13
AC138305.1	5.24991e-18	-2.43722	0.152	0.578	1.92152e-13
AC009093.2	5.57111e-18	0.470594	0.253	0.035	2.03908e-13
CAMSAP2	5.57508e-18	0.804195	0.606	0.192	2.04053e-13
HNRNPDL	5.59936e-18	0.673571	0.485	0.124	2.04942e-13
JMJD1C	5.64325e-18	1.01751	0.97	0.651	2.06549e-13
PHYKPL	5.67742e-18	0.560921	0.505	0.13	2.07799e-13
HDAC7	5.73353e-18	0.619932	0.394	0.086	2.09853e-13
PHF14	5.8714e-18	0.912822	0.576	0.183	2.14899e-13
SS18	6.05118e-18	0.678799	0.434	0.105	2.21479e-13
WBP1L	6.28142e-18	0.651305	0.394	0.085	2.29906e-13
XRCC5	6.55035e-18	0.813612	0.545	0.162	2.39749e-13
DUSP18	6.59724e-18	0.326578	0.172	0.014	2.41466e-13
PCF11	6.65046e-18	0.963339	0.535	0.161	2.43414e-13
CD302	6.90709e-18	0.520534	0.263	0.038	2.52806e-13
GPAT3	7.01423e-18	-2.05993	0.101	0.548	2.56728e-13
CFAP161	7.02169e-18	0.390221	0.182	0.016	2.57001e-13
ACTC1	7.06209e-18	-1.97245	0.111	0.552	2.58479e-13
DDX3X	7.32506e-18	0.858637	0.545	0.162	2.68105e-13
PUS7L	7.49547e-18	0.34194	0.222	0.027	2.74342e-13
PSIP1	7.78643e-18	0.399785	0.384	0.079	2.84991e-13
CLIC5	7.96812e-18	-1.87168	0.131	0.576	2.91641e-13
ADAMTS9-AS2	8.09956e-18	1.21726	0.626	0.221	2.96452e-13
MTMR9	8.46788e-18	0.549188	0.283	0.046	3.09933e-13
SEMA6D	8.61188e-18	1.245	0.424	0.111	3.15203e-13
ESYT2	8.72932e-18	1.0317	0.828	0.381	3.19502e-13
LTBR	8.90887e-18	0.363861	0.222	0.027	3.26074e-13
PROS1	8.98362e-18	0.709877	0.343	0.067	3.2881e-13
TRIP12	9.04459e-18	0.941122	0.646	0.233	3.31041e-13
NFKBIA	9.04707e-18	0.569764	0.273	0.042	3.31132e-13
TTC28	9.12312e-18	1.10642	0.859	0.458	3.33915e-13
PPIA	9.28086e-18	0.655218	0.343	0.067	3.39689e-13
MCMBP	9.36623e-18	0.568616	0.232	0.03	3.42813e-13
RRAGA	9.65601e-18	0.276107	0.192	0.019	3.5342e-13
HP1BP3	1.00091e-17	0.814436	0.657	0.228	3.66343e-13
SNED1	1.01223e-17	0.877847	0.444	0.116	3.70487e-13
PCED1B	1.02512e-17	0.931066	0.242	0.034	3.75205e-13
FAM13A	1.07787e-17	1.00298	0.616	0.207	3.9451e-13
S100A10	1.12133e-17	0.495169	0.293	0.049	4.1042e-13
HCG11	1.1225e-17	0.210993	0.121	0.005	4.10847e-13
WDR27	1.14608e-17	0.65186	0.364	0.075	4.19477e-13
RNF150	1.14952e-17	-1.95113	0.192	0.616	4.20734e-13
CWC22	1.15459e-17	0.512266	0.293	0.049	4.22593e-13
MEIS3	1.15658e-17	0.337132	0.121	0.005	4.23319e-13
ARL15	1.16357e-17	1.21883	0.889	0.581	4.2588e-13
PRDM16	1.22686e-17	-1.87406	0.131	0.565	4.49041e-13
RAB7B	1.2275e-17	0.294741	0.141	0.008	4.49277e-13
WDR26	1.28957e-17	0.640817	0.535	0.149	4.71994e-13
CMTM3	1.30184e-17	0.306097	0.141	0.008	4.76486e-13
TCF12	1.45366e-17	0.992525	0.909	0.513	5.32054e-13
TMEM87A	1.48872e-17	0.647687	0.434	0.107	5.44888e-13
XRN1	1.50461e-17	0.756382	0.606	0.195	5.50703e-13
STEAP4	1.68213e-17	0.785101	0.222	0.028	6.15678e-13
ACSL4	1.69642e-17	0.833461	0.434	0.108	6.20906e-13
NIPBL	1.74372e-17	0.982844	0.818	0.423	6.38217e-13
PABPC1	1.96698e-17	0.651326	0.586	0.176	7.19935e-13
SHOC2	1.97829e-17	0.767279	0.576	0.178	7.24073e-13
MTMR2	2.05454e-17	0.836312	0.354	0.075	7.51982e-13
MBNL1	2.09507e-17	1.12329	0.909	0.659	7.66817e-13
IMPAD1	2.14297e-17	0.356877	0.293	0.049	7.84349e-13
RFTN1	2.18573e-17	0.780257	0.465	0.122	7.99999e-13
PTGS2	2.30788e-17	0.409292	0.152	0.01	8.44708e-13
CHORDC1	2.3247e-17	0.652224	0.414	0.096	8.50865e-13
AL355835.1	2.45782e-17	0.723299	0.172	0.015	8.99585e-13
NAALAD2	2.53341e-17	0.4335	0.182	0.017	9.27255e-13
ADCY7	2.54322e-17	0.322898	0.152	0.01	9.30844e-13
FAM162B	2.57425e-17	0.348465	0.152	0.01	9.42202e-13
TMEM248	2.58699e-17	0.496915	0.323	0.06	9.46862e-13
KIAA0040	2.60676e-17	0.392932	0.202	0.022	9.541e-13
SDC3	2.63744e-17	0.380452	0.152	0.01	9.65331e-13
AC092652.2	2.67369e-17	0.347604	0.111	0.003	9.78598e-13
ANKRD36C	2.68003e-17	0.717461	0.475	0.126	9.80918e-13
RLF	2.69651e-17	0.835978	0.636	0.221	9.86949e-13
PHF1	2.75195e-17	0.331427	0.192	0.02	1.00724e-12
SLC37A3	2.79846e-17	0.449491	0.283	0.046	1.02426e-12
EIF5A	2.83536e-17	0.377425	0.192	0.02	1.03777e-12
ARMCX4	2.84719e-17	0.536409	0.444	0.109	1.0421e-12
LINC00377	2.93917e-17	0.410732	0.111	0.003	1.07577e-12
CFAP69	2.98085e-17	0.306439	0.202	0.022	1.09102e-12
DUSP16	3.07662e-17	0.71225	0.566	0.173	1.12607e-12
DIPK2A	3.18682e-17	0.442602	0.222	0.028	1.16641e-12
TASOR	3.20912e-17	0.643301	0.455	0.116	1.17457e-12
DLC1	3.29867e-17	1.3853	0.879	0.618	1.20735e-12
UBE2D3	3.38206e-17	0.816295	0.848	0.368	1.23787e-12
WDFY3	3.42839e-17	0.936552	0.727	0.299	1.25483e-12
IQCG	3.52617e-17	0.207926	0.152	0.01	1.29061e-12
CREBZF	3.53008e-17	0.426021	0.253	0.037	1.29204e-12
RUFY2	3.54741e-17	0.632766	0.414	0.097	1.29839e-12
COLGALT2	3.74479e-17	0.776463	0.273	0.045	1.37063e-12
VAT1	3.76358e-17	0.28293	0.162	0.013	1.37751e-12
AHI1	3.84274e-17	1.03442	0.768	0.329	1.40648e-12
TEX10	3.87479e-17	0.319929	0.182	0.017	1.41821e-12
RNF11	4.1277e-17	0.558675	0.434	0.105	1.51078e-12
MT-CO1	4.18842e-17	-1.05933	0.848	0.973	1.53301e-12
CSGALNACT2	4.21776e-17	0.62531	0.273	0.045	1.54374e-12
FCGRT	4.22599e-17	0.348611	0.222	0.028	1.54676e-12
KRAS	4.25324e-17	0.503718	0.263	0.041	1.55673e-12
MFAP5	4.26829e-17	0.961011	0.222	0.029	1.56224e-12
CDC14A	4.37114e-17	0.749413	0.374	0.083	1.59988e-12
DUBR	4.38468e-17	0.606759	0.364	0.076	1.60484e-12
WAC	4.53757e-17	0.846741	0.758	0.311	1.6608e-12
MB	4.58121e-17	-1.83339	0.172	0.582	1.67677e-12
ICOSLG	4.5976e-17	0.410731	0.131	0.007	1.68277e-12
CFAP44	4.77819e-17	0.572405	0.343	0.071	1.74887e-12
TMEM43	4.86451e-17	0.343004	0.222	0.028	1.78046e-12
HOMER1	5.00798e-17	-1.90416	0.242	0.628	1.83297e-12
CAVIN3	5.02507e-17	0.263103	0.172	0.015	1.83922e-12
MAP3K1	5.05679e-17	0.740536	0.343	0.072	1.85084e-12
UFM1	5.08846e-17	0.350303	0.283	0.046	1.86243e-12
CHRDL2	5.12107e-17	0.449281	0.131	0.007	1.87436e-12
ARHGAP24	5.25294e-17	1.21883	0.818	0.521	1.92263e-12
PCDH18	5.26087e-17	0.211431	0.131	0.007	1.92553e-12
HNRNPUL1	5.52499e-17	0.451027	0.364	0.074	2.0222e-12
STAT3	5.68278e-17	0.918676	0.788	0.319	2.07995e-12
MYH6	5.84865e-17	-2.28939	0.03	0.481	2.14066e-12
RPS2	5.94596e-17	0.633142	0.455	0.116	2.17628e-12
TEX41	6.10589e-17	0.995823	0.192	0.021	2.23482e-12
GPC4	6.28615e-17	0.431419	0.232	0.031	2.30079e-12
SGCG	6.31494e-17	-1.82891	0.131	0.556	2.31133e-12
RPS25	6.98934e-17	0.40228	0.384	0.081	2.55817e-12
C6	7.12795e-17	0.652699	0.242	0.036	2.6089e-12
SAMD4A	7.20746e-17	-0.926411	0.697	0.914	2.638e-12
ETF1	7.35771e-17	0.844759	0.525	0.154	2.693e-12
MID1	7.37201e-17	0.875393	0.495	0.138	2.69823e-12
PEBP4	7.44883e-17	-1.87057	0.172	0.582	2.72635e-12
TTC21B	7.56545e-17	0.669585	0.424	0.105	2.76903e-12
SEC22B	7.58295e-17	0.566771	0.263	0.042	2.77543e-12
HDAC9	7.60537e-17	-2.01104	0.111	0.54	2.78364e-12
QSER1	7.64763e-17	0.586193	0.394	0.089	2.79911e-12
FAM102B	7.68135e-17	0.59539	0.293	0.051	2.81145e-12
BTG2	7.68386e-17	1.0671	0.566	0.192	2.81237e-12
LSM8	7.9726e-17	0.377854	0.202	0.023	2.91805e-12
FRMD4B	8.09473e-17	1.03348	0.657	0.246	2.96275e-12
ANTXR2	8.17566e-17	1.11841	0.525	0.176	2.99237e-12
PDIA3	8.32164e-17	0.466535	0.465	0.118	3.0458e-12
SRPX	8.50434e-17	0.511369	0.242	0.035	3.11267e-12
HNRNPF	8.79964e-17	0.45685	0.333	0.066	3.22076e-12
DCHS1	8.82573e-17	0.500522	0.192	0.021	3.23031e-12
MTREX	9.60789e-17	0.672427	0.505	0.141	3.51658e-12
GSTP1	1.00295e-16	0.442623	0.263	0.041	3.67091e-12
RAB1A	1.01642e-16	0.813956	0.768	0.316	3.72019e-12
MT-ATP8	1.0308e-16	-1.28785	0.626	0.861	3.77282e-12
STK4	1.09222e-16	0.602594	0.323	0.064	3.99762e-12
RPS18	1.097e-16	0.550644	0.414	0.098	4.01513e-12
LAMP2	1.1027e-16	0.59523	0.343	0.071	4.03598e-12
LINC02511	1.14341e-16	1.10963	0.202	0.024	4.18499e-12
DNMBP	1.14745e-16	0.609424	0.343	0.072	4.19977e-12
OSMR-AS1	1.16962e-16	0.715638	0.212	0.027	4.28094e-12
SETX	1.17067e-16	0.669196	0.626	0.199	4.28476e-12
RET	1.1816e-16	0.498533	0.182	0.019	4.32479e-12
PLOD1	1.18813e-16	0.425298	0.323	0.063	4.34867e-12
COLGALT1	1.21167e-16	0.237685	0.202	0.023	4.43482e-12
RANBP9	1.22723e-16	0.672979	0.455	0.118	4.49179e-12
LRP11	1.23151e-16	0.293435	0.263	0.041	4.50743e-12
ENSA	1.26578e-16	0.571239	0.384	0.087	4.63289e-12
TTC26	1.29806e-16	0.549322	0.192	0.021	4.75103e-12
RAP2C	1.37515e-16	0.278415	0.192	0.021	5.03317e-12
MX2	1.57055e-16	0.514028	0.162	0.014	5.74837e-12
NDFIP1	1.5779e-16	0.621129	0.545	0.166	5.77527e-12
WASHC4	1.58298e-16	0.588432	0.475	0.129	5.79388e-12
KIFAP3	1.59263e-16	0.822011	0.576	0.185	5.82919e-12
NBPF9	1.64402e-16	0.370732	0.182	0.019	6.01728e-12
PDGFRL	1.68896e-16	0.376448	0.152	0.012	6.18175e-12
LRRC8D	1.70585e-16	0.755084	0.394	0.097	6.24357e-12
RGS22	1.72314e-16	0.342517	0.121	0.006	6.30685e-12
HMGN5	1.77201e-16	0.432314	0.121	0.006	6.48572e-12
IL15RA	1.79142e-16	0.415648	0.162	0.014	6.55677e-12
YIPF2	1.82224e-16	0.298933	0.121	0.006	6.6696e-12
FZD4	1.83892e-16	0.338609	0.263	0.042	6.73063e-12
PHGDH	1.87389e-16	0.404091	0.121	0.006	6.85861e-12
EHBP1	1.9177e-16	1.17447	0.657	0.27	7.01899e-12
ATP6V1G1	1.9235e-16	0.311002	0.192	0.021	7.04021e-12
ATXN2L	1.96253e-16	0.508522	0.242	0.036	7.18306e-12
SOCS3	1.96966e-16	0.403721	0.212	0.027	7.20916e-12
SYT17	2.15951e-16	0.38726	0.172	0.016	7.90401e-12
ARHGAP32	2.1807e-16	0.764971	0.455	0.124	7.98157e-12
RECK	2.18846e-16	0.480738	0.343	0.071	8.00997e-12
AC092683.1	2.22912e-16	0.333587	0.152	0.012	8.15881e-12
SNX14	2.25529e-16	0.648501	0.545	0.166	8.2546e-12
RAB5A	2.26264e-16	0.509431	0.404	0.095	8.28148e-12
ANO5	2.27091e-16	-1.83085	0.152	0.561	8.31174e-12
JPH2	2.29873e-16	-1.8261	0.101	0.526	8.4136e-12
CLCC1	2.3765e-16	0.287284	0.182	0.019	8.69823e-12
MR1	2.39601e-16	0.28881	0.172	0.016	8.76965e-12
IFT80	2.40458e-16	0.604468	0.313	0.06	8.801e-12
FOXO1	2.42826e-16	1.06282	0.747	0.309	8.88766e-12
NKTR	2.43992e-16	0.787076	0.657	0.233	8.93033e-12
ARNT	2.53064e-16	0.590332	0.434	0.111	9.26239e-12
CERS5	2.57963e-16	0.52252	0.323	0.065	9.4417e-12
SRGAP2B	2.63059e-16	0.345841	0.172	0.016	9.62822e-12
SERPINB1	2.68572e-16	0.342266	0.172	0.016	9.82999e-12
SIN3A	2.68781e-16	0.639545	0.313	0.061	9.83766e-12
MYLK3	2.73333e-16	-1.91168	0.111	0.523	1.00042e-11
TOPORS	2.82296e-16	0.344617	0.212	0.027	1.03323e-11
SMAD5	2.82488e-16	0.536081	0.404	0.096	1.03393e-11
KLC1	2.83831e-16	0.671882	0.646	0.224	1.03885e-11
TMEM179B	2.99224e-16	0.278962	0.162	0.014	1.09519e-11
AGMO	3.25952e-16	1.31563	0.253	0.044	1.19302e-11
DDX6	3.29485e-16	0.572026	0.566	0.173	1.20595e-11
SLC16A2	3.39837e-16	0.568678	0.192	0.022	1.24384e-11
ZNF117	3.45757e-16	0.458361	0.263	0.043	1.2655e-11
ACTR10	3.51323e-16	0.535813	0.313	0.063	1.28588e-11
APLF	3.56405e-16	0.507995	0.333	0.068	1.30448e-11
COL4A1	3.59476e-16	1.20901	0.697	0.292	1.31572e-11
BRMS1L	3.68732e-16	0.543019	0.253	0.041	1.3496e-11
PLCXD3	3.7829e-16	-1.68736	0.354	0.683	1.38458e-11
CCDC50	3.80313e-16	0.68232	0.475	0.133	1.39198e-11
SKI	3.83214e-16	0.707952	0.525	0.154	1.4026e-11
RB1	3.86698e-16	1.01029	0.626	0.234	1.41535e-11
PXDNL	3.99302e-16	-1.13547	0.727	0.884	1.46149e-11
MROH7	4.01413e-16	-1.91846	0.071	0.497	1.46921e-11
DDX58	4.15921e-16	0.601736	0.253	0.041	1.52231e-11
PANK3	4.33603e-16	0.471125	0.263	0.044	1.58703e-11
BRWD3	4.46974e-16	0.747015	0.323	0.068	1.63597e-11
NUP153	4.6447e-16	0.915484	0.475	0.143	1.70001e-11
APBB2	4.65196e-16	0.906369	0.566	0.192	1.70266e-11
DSCAML1	4.66997e-16	0.847031	0.283	0.052	1.70926e-11
SRSF8	4.71207e-16	0.294762	0.131	0.008	1.72467e-11
PALM	4.75738e-16	0.36378	0.202	0.024	1.74125e-11
THUMPD1	4.80196e-16	0.36373	0.192	0.022	1.75756e-11
SEC61A1	5.17139e-16	0.414152	0.313	0.061	1.89278e-11
ARPC1B	5.2851e-16	0.315572	0.242	0.036	1.9344e-11
ACAP2	5.47962e-16	0.848064	0.576	0.192	2.00559e-11
AC009623.1	5.53643e-16	0.335679	0.111	0.005	2.02639e-11
RAB23	5.55309e-16	0.407457	0.212	0.028	2.03248e-11
SERTAD4	5.63007e-16	0.311536	0.131	0.008	2.06066e-11
PAK3	5.63007e-16	0.27325	0.131	0.008	2.06066e-11
WBP11	5.64916e-16	0.453889	0.212	0.028	2.06765e-11
ILKAP	5.68492e-16	0.606684	0.354	0.078	2.08074e-11
AP2A1	5.69424e-16	0.414495	0.283	0.05	2.08415e-11
RND3	5.80423e-16	0.734691	0.374	0.088	2.1244e-11
AC107208.1	5.81909e-16	0.701943	0.202	0.025	2.12985e-11
CASZ1	5.81917e-16	-1.78939	0.141	0.55	2.12987e-11
NAF1	5.8684e-16	0.51384	0.232	0.035	2.14789e-11
CFI	5.92329e-16	0.266998	0.131	0.008	2.16798e-11
KCTD8	5.92852e-16	1.0332	0.192	0.023	2.1699e-11
ZDHHC21	5.96126e-16	0.916992	0.545	0.183	2.18188e-11
ANKRD36B	6.00071e-16	0.440938	0.222	0.031	2.19632e-11
IGFBP4	6.00994e-16	0.584819	0.444	0.114	2.1997e-11
PPP4R2	6.06851e-16	0.668884	0.606	0.202	2.22113e-11
PAGR1	6.63917e-16	0.214274	0.131	0.008	2.43e-11
MYOCD	6.71375e-16	-2.02196	0.091	0.504	2.4573e-11
XAB2	6.7238e-16	0.234173	0.131	0.008	2.46098e-11
SCN5A	6.79894e-16	-1.78769	0.121	0.53	2.48848e-11
SLAIN2	7.00724e-16	0.66767	0.505	0.146	2.56472e-11
VTA1	7.04113e-16	0.580371	0.232	0.035	2.57712e-11
TRIM47	7.09617e-16	0.214735	0.111	0.005	2.59727e-11
AC008147.2	7.20034e-16	0.234685	0.111	0.005	2.6354e-11
MDM2	7.3668e-16	0.608592	0.273	0.049	2.69632e-11
CEP128	7.65873e-16	0.75167	0.323	0.067	2.80317e-11
AL391807.1	7.74419e-16	0.21229	0.111	0.005	2.83445e-11
TMX3	7.81504e-16	0.473778	0.333	0.07	2.86038e-11
EPC1	7.99853e-16	0.782483	0.778	0.323	2.92754e-11
CCNT2	8.02513e-16	0.55403	0.444	0.116	2.93728e-11
AC090348.1	8.58937e-16	-1.91064	0.04	0.465	3.1438e-11
GSTA4	8.97024e-16	0.48996	0.222	0.031	3.2832e-11
ATP11B	9.24867e-16	0.811138	0.576	0.191	3.38511e-11
TAF1D	9.27277e-16	0.544433	0.394	0.095	3.39393e-11
MT-ND4	9.30859e-16	-0.750751	1	1	3.40704e-11
RCN3	9.40742e-16	0.370329	0.141	0.01	3.44321e-11
CFAP97	9.59443e-16	0.367638	0.212	0.028	3.51166e-11
ASCC3	9.68942e-16	0.916209	0.586	0.211	3.54642e-11
PCNP	9.96429e-16	0.592387	0.424	0.11	3.64703e-11
SLC6A1	1.00142e-15	0.332355	0.152	0.013	3.66531e-11
CNOT2	1.01707e-15	0.744108	0.616	0.212	3.72257e-11
NAB2	1.07064e-15	0.235653	0.141	0.01	3.91865e-11
CYBA	1.0786e-15	0.21968	0.182	0.02	3.9478e-11
CCDC102B	1.09854e-15	1.18773	0.343	0.081	4.02078e-11
ZNF708	1.2118e-15	0.402316	0.263	0.044	4.43532e-11
ALPK1	1.22934e-15	0.404471	0.263	0.044	4.49949e-11
RIMKLB	1.23865e-15	0.563447	0.303	0.06	4.53359e-11
AHCYL1	1.25077e-15	0.473883	0.475	0.127	4.57796e-11
LINC01578	1.25717e-15	0.494905	0.465	0.125	4.60136e-11
GCNT2	1.25897e-15	-1.79867	0.081	0.495	4.60797e-11
YY1	1.26009e-15	0.472495	0.444	0.116	4.61205e-11
TRPC4AP	1.26025e-15	0.621884	0.525	0.161	4.61263e-11
RALGAPA1	1.26554e-15	0.909269	0.778	0.374	4.63199e-11
PSPC1	1.28603e-15	0.794135	0.646	0.234	4.70701e-11
GOLT1B	1.29697e-15	0.361972	0.202	0.025	4.74704e-11
RNF213	1.31202e-15	0.507659	0.455	0.121	4.80212e-11
EFR3A	1.40884e-15	0.784034	0.525	0.169	5.15649e-11
LINC02248	1.41929e-15	-2.03999	0.111	0.509	5.19475e-11
POLI	1.45318e-15	0.287003	0.202	0.025	5.31877e-11
FAM126A	1.47615e-15	0.748358	0.535	0.171	5.40287e-11
ABI1	1.56297e-15	0.503268	0.434	0.112	5.72061e-11
NUP98	1.59554e-15	0.66864	0.636	0.219	5.83982e-11
AC037198.1	1.6097e-15	0.32337	0.152	0.013	5.89167e-11
DIS3	1.61245e-15	0.339043	0.222	0.031	5.90173e-11
PTPRT	1.62017e-15	1.13209	0.333	0.075	5.92997e-11
DDX5	1.66078e-15	0.881857	0.808	0.387	6.07862e-11
ZMAT3	1.73546e-15	0.768896	0.253	0.043	6.35197e-11
AL050309.1	1.77594e-15	0.747997	0.303	0.061	6.50011e-11
SPEF2	1.83248e-15	0.406681	0.192	0.023	6.70705e-11
LDB2	1.86018e-15	1.30811	0.657	0.297	6.80845e-11
PPP2R1B	1.86302e-15	0.390089	0.242	0.038	6.81883e-11
GAS1RR	1.86791e-15	0.262811	0.101	0.003	6.83673e-11
PAK2	1.90256e-15	0.646275	0.485	0.141	6.96357e-11
VWC2	1.93052e-15	-1.75848	0.101	0.533	7.0659e-11
VPS36	1.95016e-15	0.56286	0.364	0.085	7.13779e-11
NPAS3	1.9652e-15	1.3709	0.616	0.255	7.19283e-11
MINDY3	1.97966e-15	0.607131	0.364	0.086	7.24574e-11
PTGIR	1.98665e-15	0.334994	0.101	0.003	7.27132e-11
ADAM22	1.98693e-15	0.483632	0.283	0.053	7.27237e-11
SLIT3	1.98824e-15	1.10704	0.444	0.131	7.27716e-11
YWHAZ	2.02152e-15	0.845358	0.808	0.373	7.39896e-11
MYO9A	2.04391e-15	0.939049	0.737	0.33	7.48093e-11
LSAMP	2.08149e-15	1.7932	0.616	0.272	7.61846e-11
MRE11	2.10268e-15	0.394425	0.283	0.052	7.696e-11
RPS28	2.14207e-15	0.618466	0.495	0.146	7.84019e-11
AC079148.3	2.14557e-15	0.364477	0.101	0.003	7.85298e-11
GHDC	2.14557e-15	0.26135	0.101	0.003	7.85298e-11
TTC14	2.21576e-15	0.541724	0.424	0.11	8.10992e-11
VPS13B	2.26232e-15	0.886596	0.869	0.486	8.28032e-11
APP	2.27135e-15	1.00678	0.737	0.353	8.31338e-11
SPCS3	2.39561e-15	0.554707	0.313	0.065	8.76816e-11
WEE1	2.43818e-15	0.527073	0.202	0.027	8.92398e-11
AC012404.1	2.46964e-15	0.261499	0.121	0.007	9.03912e-11
KATNA1	2.47493e-15	0.391964	0.273	0.049	9.05848e-11
KCND3	2.54387e-15	-1.71236	0.222	0.583	9.31083e-11
ARMC9	2.5642e-15	0.389629	0.222	0.032	9.38521e-11
MGAT1	2.56527e-15	0.244574	0.263	0.044	9.38915e-11
SRSF6	2.58667e-15	0.518154	0.394	0.097	9.46747e-11
MCL1	2.61793e-15	0.649607	0.616	0.209	9.58188e-11
ARMCX5-GPRASP2	2.75222e-15	0.578505	0.283	0.053	1.00734e-10
GABARAPL2	2.79487e-15	0.351236	0.242	0.038	1.02295e-10
PFN1	2.84377e-15	0.342368	0.253	0.042	1.04085e-10
NPEPPS	2.99387e-15	0.744504	0.606	0.214	1.09579e-10
UBE2E1	3.09088e-15	0.913296	0.616	0.234	1.13129e-10
KLF13	3.13838e-15	0.582889	0.343	0.078	1.14868e-10
CDC27	3.1974e-15	0.716262	0.515	0.163	1.17028e-10
SAMD8	3.31756e-15	0.604165	0.535	0.167	1.21426e-10
FBXO17	3.33602e-15	0.370327	0.182	0.021	1.22102e-10
PACRG	3.4319e-15	-1.68839	0.232	0.622	1.25611e-10
LINC01697	3.43453e-15	0.604436	0.172	0.019	1.25707e-10
RAB31	3.51193e-15	0.459246	0.303	0.06	1.2854e-10
MIR100HG	3.57004e-15	1.17166	0.545	0.189	1.30667e-10
POLK	3.61284e-15	0.584585	0.434	0.117	1.32234e-10
YTHDC2	3.69408e-15	0.748335	0.505	0.16	1.35207e-10
RPL10A	3.75085e-15	0.442696	0.323	0.067	1.37285e-10
SP3	3.76735e-15	0.79704	0.364	0.09	1.37889e-10
SH3GLB1	3.8227e-15	0.527078	0.424	0.111	1.39915e-10
DOCK9	3.89174e-15	0.735531	0.616	0.214	1.42442e-10
PPP3CB	3.92281e-15	0.608243	0.545	0.174	1.43579e-10
ARHGAP12	3.92422e-15	0.819414	0.495	0.155	1.4363e-10
CSRP1	4.00951e-15	0.476025	0.253	0.042	1.46752e-10
SIK2	4.08537e-15	1.29646	0.677	0.292	1.49529e-10
DENND4C	4.20537e-15	0.544942	0.606	0.197	1.53921e-10
AC005165.1	4.31958e-15	0.400881	0.091	0.002	1.58101e-10
WNT5B	4.33158e-15	0.418786	0.172	0.019	1.5854e-10
BBX	4.43263e-15	0.928783	0.687	0.287	1.62239e-10
TWSG1	4.45635e-15	0.447751	0.253	0.043	1.63107e-10
TUBA1B	4.4589e-15	0.551897	0.354	0.081	1.632e-10
AC099792.1	4.57164e-15	0.536257	0.131	0.009	1.67327e-10
SMAD4	4.58654e-15	0.651611	0.424	0.117	1.67872e-10
CGGBP1	4.62218e-15	0.55697	0.313	0.066	1.69176e-10
PPP2R2A	4.6574e-15	0.765256	0.657	0.254	1.70465e-10
TMEM59	4.66084e-15	0.500207	0.333	0.073	1.70592e-10
SARAF	4.6714e-15	0.524404	0.374	0.09	1.70978e-10
PNMA1	4.69142e-15	0.205381	0.091	0.002	1.71711e-10
RFC5	4.70046e-15	0.142696	0.071	0	1.72041e-10
GLA	4.70046e-15	0.149252	0.071	0	1.72041e-10
MGAT4C	4.70433e-15	-1.96475	0.091	0.492	1.72183e-10
GABBR1	4.70751e-15	0.359742	0.283	0.052	1.723e-10
CGNL1	4.72207e-15	0.562229	0.374	0.09	1.72832e-10
AL513166.1	4.83077e-15	0.780345	0.283	0.057	1.76811e-10
RMST	4.85451e-15	0.439094	0.131	0.009	1.7768e-10
RCOR1	4.86612e-15	0.874681	0.535	0.171	1.78105e-10
AIP	4.91312e-15	0.203531	0.131	0.009	1.79825e-10
GLT8D2	5.10285e-15	0.376222	0.172	0.019	1.8677e-10
FSTL1	5.11256e-15	1.00876	0.707	0.284	1.87125e-10
IER2	5.12898e-15	0.554204	0.455	0.124	1.87726e-10
JHY	5.21677e-15	0.258515	0.131	0.009	1.90939e-10
LINC00894	5.22357e-15	0.552748	0.485	0.139	1.91188e-10
MIF	5.27312e-15	0.409534	0.242	0.039	1.93002e-10
TANC1	5.31097e-15	-1.42261	0.333	0.664	1.94387e-10
MANEA	5.40775e-15	0.306667	0.131	0.009	1.97929e-10
GOLIM4	5.50472e-15	0.780759	0.586	0.206	2.01478e-10
TMC3-AS1	5.53888e-15	0.372275	0.131	0.009	2.02728e-10
BACH2	5.55994e-15	1.03238	0.525	0.182	2.03499e-10
ERAP2	5.71758e-15	0.437192	0.152	0.014	2.09269e-10
PYGO1	5.77289e-15	0.392341	0.192	0.024	2.11294e-10
UBTD2	5.79979e-15	0.639754	0.343	0.079	2.12278e-10
SAMD4B	5.87542e-15	0.680785	0.455	0.127	2.15046e-10
GBP4	5.90211e-15	0.320762	0.152	0.014	2.16023e-10
ADD3	5.92531e-15	0.953411	0.828	0.409	2.16872e-10
SYNCRIP	5.96779e-15	0.501526	0.465	0.13	2.18427e-10
NIBAN2	6.03015e-15	0.303834	0.162	0.016	2.2071e-10
HES1	6.03633e-15	0.695308	0.313	0.066	2.20936e-10
IL1R1	6.05764e-15	0.488078	0.222	0.034	2.21716e-10
RPS9	6.12654e-15	0.534282	0.444	0.121	2.24238e-10
YWHAQ	6.14595e-15	0.692271	0.566	0.19	2.24948e-10
AC020611.2	6.37879e-15	0.174158	0.081	0.001	2.3347e-10
LINC00648	6.49554e-15	0.192243	0.081	0.001	2.37743e-10
SRSF2	6.502e-15	0.430748	0.313	0.065	2.3798e-10
NR3C1	6.53687e-15	0.903299	0.717	0.307	2.39256e-10
CDON	6.59972e-15	0.51188	0.222	0.034	2.41556e-10
SUB1	6.62504e-15	0.465198	0.384	0.094	2.42483e-10
TMBIM4	6.80826e-15	0.539611	0.404	0.104	2.49189e-10
SNCAIP	6.91639e-15	0.495311	0.152	0.014	2.53147e-10
QSOX1	6.96558e-15	0.516023	0.303	0.061	2.54947e-10
MELTF	6.98396e-15	0.219497	0.081	0.001	2.5562e-10
AMIGO2	6.98396e-15	0.191248	0.081	0.001	2.5562e-10
PRDM8	7.11161e-15	0.134819	0.081	0.001	2.60292e-10
AL646090.2	7.11161e-15	0.258351	0.081	0.001	2.60292e-10
CDR2L	7.1174e-15	0.287966	0.141	0.012	2.60504e-10
RSPRY1	7.13095e-15	0.426584	0.333	0.073	2.61e-10
MXD4	7.30182e-15	0.24502	0.202	0.027	2.67254e-10
RPS3	7.30353e-15	0.528759	0.444	0.121	2.67316e-10
RPL36AL	7.44665e-15	0.272967	0.152	0.014	2.72555e-10
TNKS2	7.61783e-15	0.545854	0.444	0.125	2.7882e-10
MORC4	7.74966e-15	0.582435	0.232	0.037	2.83645e-10
CYP20A1	7.7876e-15	0.65728	0.414	0.108	2.85034e-10
BRAF	7.86528e-15	0.860154	0.828	0.393	2.87877e-10
RPL30	7.92364e-15	0.463135	0.434	0.115	2.90013e-10
CKMT2	7.99981e-15	-1.78925	0.081	0.475	2.92801e-10
TAB2	8.02659e-15	0.87657	0.465	0.144	2.93781e-10
STIM2	8.03628e-15	0.402638	0.293	0.058	2.94136e-10
CAVIN1	8.14607e-15	0.717071	0.535	0.17	2.98154e-10
GLUD1	8.53411e-15	0.692035	0.303	0.064	3.12357e-10
CHSY3	8.73808e-15	0.970312	0.283	0.058	3.19822e-10
TSPYL1	8.77798e-15	0.353634	0.192	0.024	3.21283e-10
C1QTNF1	8.78982e-15	0.470648	0.182	0.022	3.21716e-10
RPL15	9.00085e-15	0.454765	0.414	0.107	3.2944e-10
FABP3	9.03707e-15	-1.78529	0.091	0.487	3.30766e-10
TRMT13	9.12518e-15	0.407944	0.242	0.041	3.33991e-10
DAB2	9.16819e-15	0.301201	0.192	0.024	3.35565e-10
GFPT1	9.24027e-15	0.580729	0.424	0.116	3.38203e-10
RASA2	9.28955e-15	0.753931	0.515	0.167	3.40007e-10
MYH10	9.71235e-15	0.441795	0.525	0.158	3.55482e-10
TMEM45A	1.00095e-14	0.362771	0.111	0.006	3.66357e-10
ALPK3	1.0225e-14	-1.76804	0.232	0.578	3.74244e-10
USP9X	1.03707e-14	0.771944	0.606	0.221	3.79579e-10
TSPAN9	1.05282e-14	-1.72395	0.283	0.601	3.85344e-10
RARRES2	1.05366e-14	0.19134	0.152	0.014	3.8565e-10
MON2	1.08882e-14	0.839545	0.677	0.279	3.9852e-10
THSD7A	1.10654e-14	0.86451	0.303	0.065	4.05003e-10
DNAJA1	1.15517e-14	0.537453	0.384	0.096	4.22802e-10
COPB2	1.15708e-14	0.362019	0.253	0.044	4.23502e-10
AC007389.1	1.15877e-14	0.512068	0.333	0.074	4.24122e-10
PURG	1.16173e-14	0.188362	0.111	0.006	4.25206e-10
CD248	1.17755e-14	0.259238	0.111	0.006	4.30996e-10
TRIOBP	1.17907e-14	0.458846	0.444	0.121	4.31551e-10
PITPNC1	1.19549e-14	1.19082	0.495	0.174	4.3756e-10
AC007319.1	1.20054e-14	1.8315	0.364	0.096	4.39411e-10
HAAO	1.20983e-14	0.265447	0.111	0.006	4.42809e-10
TTC7A	1.21561e-14	0.484988	0.303	0.064	4.44926e-10
ABCA5	1.21817e-14	0.739315	0.525	0.175	4.45864e-10
ATF7	1.22016e-14	0.771932	0.556	0.188	4.46589e-10
NYNRIN	1.22629e-14	0.2115	0.111	0.006	4.48835e-10
GLIS2	1.22629e-14	0.191537	0.111	0.006	4.48835e-10
ATP2A2	1.23418e-14	-1.36613	0.525	0.729	4.51723e-10
FXYD1	1.24042e-14	0.294863	0.333	0.072	4.54004e-10
RTL8C	1.25904e-14	0.353126	0.232	0.037	4.60822e-10
GBA	1.27701e-14	0.182431	0.111	0.006	4.674e-10
IQSEC1	1.30274e-14	0.809739	0.535	0.174	4.76816e-10
OTUD7A	1.31088e-14	0.759689	0.394	0.105	4.79796e-10
CD55	1.34578e-14	0.860359	0.384	0.101	4.92568e-10
EIF3B	1.35588e-14	0.264554	0.222	0.034	4.96267e-10
SSX2IP	1.36273e-14	0.492936	0.162	0.017	4.98771e-10
PSMA3-AS1	1.38027e-14	0.571964	0.374	0.094	5.05192e-10
HIVEP1	1.38414e-14	0.797783	0.444	0.133	5.06608e-10
SURF4	1.39619e-14	0.282928	0.242	0.041	5.11019e-10
RPL27	1.42586e-14	0.414341	0.303	0.063	5.21881e-10
VKORC1	1.42892e-14	0.327484	0.182	0.022	5.22999e-10
OAZ1	1.47636e-14	0.377847	0.434	0.115	5.40361e-10
DKK3	1.47674e-14	0.384503	0.394	0.097	5.40503e-10
SP140L	1.5214e-14	0.345729	0.182	0.022	5.56848e-10
ATP9A	1.54255e-14	0.462697	0.333	0.074	5.64587e-10
IRF3	1.58748e-14	0.356184	0.222	0.035	5.81035e-10
PMP22	1.60927e-14	0.707829	0.606	0.213	5.89007e-10
FBXO11	1.63103e-14	0.981902	0.768	0.349	5.96975e-10
ANXA4	1.68676e-14	0.49816	0.354	0.083	6.17372e-10
EIF4A2	1.72513e-14	0.518179	0.535	0.166	6.31415e-10
CCNL2	1.73718e-14	0.459637	0.394	0.1	6.35824e-10
GNA13	1.75627e-14	0.514943	0.343	0.08	6.42813e-10
PARP14	1.76252e-14	0.541178	0.273	0.052	6.45101e-10
APPBP2	1.77373e-14	0.524246	0.485	0.144	6.49203e-10
PTGFRN	1.77912e-14	0.695121	0.434	0.124	6.51175e-10
WASL	1.89046e-14	0.841854	0.485	0.16	6.91928e-10
RACK1	1.89104e-14	0.436251	0.414	0.109	6.92141e-10
PANK2	1.89661e-14	0.297926	0.253	0.044	6.94179e-10
SPEN	1.90066e-14	0.53064	0.515	0.159	6.95662e-10
INTS6L	1.90893e-14	0.397811	0.212	0.031	6.98687e-10
DPP6	1.91363e-14	1.21882	0.273	0.057	7.00407e-10
RIPK1	1.91588e-14	0.594463	0.303	0.065	7.01231e-10
HSPB11	1.93274e-14	0.417062	0.242	0.042	7.07403e-10
RPS8	1.93491e-14	0.547863	0.515	0.16	7.08195e-10
ATP1B3	2.07557e-14	0.631408	0.455	0.132	7.59681e-10
SP110	2.10656e-14	0.369407	0.192	0.025	7.71022e-10
AC016831.5	2.13239e-14	0.32275	0.162	0.017	7.80476e-10
PIP4P2	2.17599e-14	0.520007	0.253	0.046	7.96435e-10
SUPT16H	2.17958e-14	0.381976	0.283	0.056	7.97749e-10
PPIP5K2	2.19547e-14	0.603483	0.424	0.119	8.03564e-10
CFL1	2.20726e-14	0.298131	0.323	0.07	8.07879e-10
BBIP1	2.21853e-14	0.328079	0.232	0.038	8.12004e-10
RBFOX2	2.22978e-14	0.889457	0.879	0.47	8.16121e-10
SETBP1	2.2428e-14	1.02518	0.515	0.177	8.20887e-10
CEP57L1	2.27511e-14	0.392069	0.323	0.072	8.32713e-10
MED10	2.32674e-14	0.323188	0.162	0.017	8.51609e-10
ZNFX1	2.33983e-14	0.420117	0.242	0.042	8.564e-10
LMO4	2.44559e-14	0.311471	0.273	0.051	8.95112e-10
TGS1	2.51348e-14	0.25166	0.212	0.031	9.1996e-10
INPP4B	2.51483e-14	-1.57626	0.333	0.65	9.20453e-10
STAG1	2.51852e-14	0.897415	0.848	0.476	9.21805e-10
RAB3IL1	2.5343e-14	0.365947	0.121	0.008	9.27579e-10
SMIM41	2.5343e-14	0.358828	0.121	0.008	9.27579e-10
BCHE	2.57161e-14	0.473837	0.152	0.015	9.41236e-10
NRBP1	2.57835e-14	0.327915	0.222	0.035	9.43703e-10
SNHG14	2.58725e-14	-1.15248	0.667	0.773	9.4696e-10
LINC-PINT	2.67019e-14	0.464461	0.202	0.029	9.77316e-10
XBP1	2.86547e-14	0.321838	0.222	0.035	1.04879e-09
AAK1	2.918e-14	-1.34131	0.465	0.692	1.06802e-09
CSTB	2.96271e-14	0.334553	0.162	0.017	1.08438e-09
ZBTB21	2.97403e-14	0.30892	0.242	0.042	1.08853e-09
ZDHHC1	2.99429e-14	0.383987	0.152	0.015	1.09594e-09
MIR222HG	2.99722e-14	0.815009	0.172	0.021	1.09701e-09
AC007681.1	3.06373e-14	0.323072	0.131	0.01	1.12136e-09
AC124254.2	3.06389e-14	0.550291	0.101	0.005	1.12141e-09
DAPK2	3.08429e-14	-1.81791	0.111	0.489	1.12888e-09
NFATC2	3.09538e-14	2.62362	0.374	0.109	1.13294e-09
NFAT5	3.15269e-14	0.957008	0.778	0.386	1.15392e-09
HIPK3	3.24358e-14	1.14629	0.758	0.435	1.18718e-09
ATM	3.25989e-14	0.582396	0.535	0.173	1.19315e-09
CD9	3.32597e-14	0.505707	0.273	0.053	1.21734e-09
RPL10	3.39205e-14	0.850787	0.545	0.189	1.24153e-09
DYM	3.52039e-14	0.833915	0.707	0.297	1.2885e-09
MAPK1IP1L	3.56562e-14	0.550606	0.404	0.11	1.30505e-09
CAND1	3.58415e-14	0.440064	0.313	0.07	1.31183e-09
DEK	3.62757e-14	0.331687	0.364	0.087	1.32773e-09
VPS13C	3.63162e-14	0.703996	0.687	0.276	1.32921e-09
GPX4	3.64392e-14	0.357653	0.273	0.052	1.33371e-09
NFYA	3.7304e-14	0.380182	0.212	0.032	1.36537e-09
RBM22	3.76513e-14	0.285786	0.141	0.013	1.37807e-09
TOP1	3.79999e-14	0.860099	0.697	0.309	1.39083e-09
TBX15	3.80253e-14	0.412195	0.131	0.01	1.39176e-09
PAQR3	3.84612e-14	0.56199	0.192	0.027	1.40772e-09
BST1	3.89981e-14	0.259927	0.101	0.005	1.42737e-09
TASP1	3.94788e-14	0.703441	0.404	0.114	1.44496e-09
PALM2-AKAP2	4.00849e-14	-1.38082	0.333	0.672	1.46715e-09
TSKU	4.06901e-14	0.248172	0.101	0.005	1.4893e-09
KDM6B	4.10076e-14	0.283857	0.232	0.038	1.50092e-09
CLIC4	4.11657e-14	1.0132	0.717	0.336	1.5067e-09
HAPLN1	4.127e-14	0.457627	0.101	0.005	1.51052e-09
TIAL1	4.26428e-14	0.422469	0.313	0.068	1.56077e-09
ELOVL6	4.26439e-14	0.367263	0.152	0.015	1.56081e-09
MOB1A	4.26714e-14	0.265446	0.232	0.038	1.56182e-09
TGFB3	4.30762e-14	0.325131	0.131	0.01	1.57663e-09
ELF4	4.36719e-14	0.192452	0.101	0.005	1.59844e-09
NPC1	4.38205e-14	0.5891	0.273	0.054	1.60387e-09
TM9SF2	4.38543e-14	0.415457	0.364	0.088	1.60511e-09
COL4A2	4.48419e-14	1.04597	0.737	0.36	1.64126e-09
PAPOLA	4.50096e-14	0.754395	0.636	0.247	1.6474e-09
CTTNBP2	4.61532e-14	0.452616	0.192	0.027	1.68925e-09
GSTM5	4.62112e-14	0.181043	0.101	0.005	1.69137e-09
SCARA3	4.62112e-14	0.152204	0.101	0.005	1.69137e-09
SAP30BP	4.64505e-14	0.332764	0.293	0.06	1.70013e-09
SMCHD1	4.69037e-14	0.757261	0.707	0.282	1.71672e-09
KCNQ1OT1	4.69568e-14	0.503895	0.384	0.098	1.71867e-09
YTHDC1	4.71452e-14	0.467509	0.556	0.178	1.72556e-09
ARRB1	4.79956e-14	0.480142	0.293	0.061	1.75669e-09
PPP2R3C	4.8193e-14	0.535361	0.273	0.054	1.76391e-09
PSMC5	4.86084e-14	0.19614	0.141	0.013	1.77912e-09
BMI1	4.87854e-14	0.159921	0.131	0.01	1.78559e-09
IPO7	4.93001e-14	0.518817	0.505	0.158	1.80443e-09
HHATL	4.97514e-14	-1.742	0.081	0.468	1.82095e-09
UBL3	5.01217e-14	0.754516	0.475	0.153	1.8345e-09
BTBD3	5.02499e-14	0.605089	0.343	0.083	1.8392e-09
ATP6V1C1	5.0717e-14	0.362934	0.253	0.046	1.85629e-09
GXYLT2	5.49204e-14	0.69869	0.414	0.117	2.01014e-09
RELCH	5.52192e-14	0.575706	0.434	0.125	2.02108e-09
RSRP1	5.52979e-14	0.624983	0.465	0.14	2.02396e-09
ZNF451	5.69703e-14	0.449355	0.465	0.136	2.08517e-09
FAM110B	5.77706e-14	1.09449	0.788	0.41	2.11446e-09
CUL1	5.80803e-14	0.616575	0.566	0.195	2.1258e-09
XIAP	5.84843e-14	0.583984	0.485	0.149	2.14058e-09
GPNMB	6.04828e-14	0.339022	0.374	0.092	2.21373e-09
CUL3	6.0673e-14	0.689802	0.586	0.212	2.22069e-09
HSP90AA1	6.07762e-14	-1.11126	0.697	0.804	2.22447e-09
KRIT1	6.17887e-14	0.648378	0.354	0.09	2.26153e-09
LRRC2	6.30591e-14	-1.73285	0.111	0.498	2.30803e-09
RIOK3	6.30706e-14	0.486003	0.313	0.07	2.30845e-09
TERF2IP	6.3358e-14	0.403215	0.273	0.053	2.31897e-09
IGFBP6	6.40398e-14	0.835907	0.172	0.021	2.34392e-09
EP300	6.42918e-14	0.453783	0.606	0.203	2.35314e-09
ERAP1	6.5956e-14	0.179287	0.182	0.023	2.41406e-09
TCP1	6.78953e-14	0.27207	0.212	0.032	2.48504e-09
RRAGC	6.80061e-14	0.360649	0.192	0.027	2.48909e-09
SETD7	6.80803e-14	0.474548	0.293	0.061	2.49181e-09
PBX3	7.05051e-14	0.970167	0.798	0.44	2.58056e-09
BTBD10	7.08616e-14	0.577631	0.333	0.08	2.59361e-09
MYPN	7.21521e-14	-1.79284	0.121	0.488	2.64084e-09
RIC1	7.24335e-14	0.682769	0.465	0.146	2.65114e-09
PUM2	7.44142e-14	0.731708	0.636	0.242	2.72364e-09
AC068587.4	7.66198e-14	0.38784	0.172	0.021	2.80436e-09
MRTFA	7.79722e-14	0.860309	0.717	0.331	2.85386e-09
LZTS2	7.80041e-14	0.234558	0.172	0.021	2.85503e-09
CTSA	7.85725e-14	0.38104	0.202	0.03	2.87583e-09
GSPT1	7.93597e-14	0.560801	0.384	0.102	2.90465e-09
LRCH1	7.94713e-14	0.847158	0.535	0.184	2.90873e-09
PCNX2	8.47997e-14	0.511396	0.182	0.024	3.10375e-09
SLFN11	8.59203e-14	0.329773	0.192	0.027	3.14477e-09
MSN	8.78018e-14	1.08898	0.545	0.196	3.21363e-09
CFAP36	8.80566e-14	0.298275	0.192	0.027	3.22296e-09
ADRA1A	9.01272e-14	-1.71123	0.111	0.477	3.29875e-09
TUBB	9.05705e-14	0.359729	0.303	0.065	3.31497e-09
PSEN1	9.14034e-14	0.470046	0.444	0.129	3.34546e-09
LEPROT	9.25903e-14	0.32892	0.253	0.046	3.3889e-09
DDX21	9.41354e-14	0.478077	0.253	0.048	3.44545e-09
PPP2CA	9.45432e-14	0.493106	0.465	0.138	3.46037e-09
STX2	9.48283e-14	0.415846	0.162	0.019	3.47081e-09
PGGT1B	1.00274e-13	0.452062	0.283	0.059	3.67014e-09
BHLHE40-AS1	1.02148e-13	0.616712	0.152	0.016	3.73872e-09
GNAI2	1.02791e-13	0.366745	0.333	0.078	3.76226e-09
CREB5	1.03654e-13	1.19798	0.717	0.345	3.79384e-09
FKBP8	1.05923e-13	0.240105	0.222	0.036	3.87687e-09
ZNF676	1.08197e-13	0.530787	0.364	0.094	3.96012e-09
SLC35F6	1.11386e-13	0.255292	0.111	0.007	4.07685e-09
TULP4	1.17893e-13	0.450677	0.374	0.096	4.315e-09
PRMT2	1.17986e-13	0.434458	0.374	0.094	4.31841e-09
ITGA9	1.19002e-13	-1.51409	0.293	0.61	4.35559e-09
TMOD3	1.19246e-13	0.616603	0.394	0.11	4.36451e-09
NTRK2	1.20197e-13	0.311552	0.162	0.019	4.39932e-09
NUPR1	1.21199e-13	0.264078	0.313	0.068	4.43601e-09
RPL12	1.21427e-13	0.418617	0.273	0.054	4.44434e-09
TCEAL8	1.21688e-13	0.15729	0.111	0.007	4.45389e-09
SRSF11	1.22571e-13	0.573824	0.667	0.26	4.48622e-09
PSAP	1.23109e-13	0.559062	0.687	0.26	4.50591e-09
FOXC1	1.29613e-13	0.198015	0.111	0.007	4.74397e-09
TET1	1.31097e-13	0.549685	0.333	0.079	4.79828e-09
TMEM165	1.31625e-13	0.667158	0.485	0.155	4.81762e-09
AC107204.1	1.32118e-13	0.55004	0.121	0.009	4.83564e-09
RPL18A	1.34326e-13	0.535703	0.323	0.075	4.91647e-09
RGPD5	1.36193e-13	0.131879	0.091	0.003	4.98481e-09
WDR36	1.36541e-13	0.28227	0.212	0.034	4.99755e-09
TAGLN	1.36584e-13	0.611593	0.253	0.049	4.99909e-09
LMX1B	1.38046e-13	0.249912	0.111	0.007	5.0526e-09
MEX3D	1.38246e-13	0.178403	0.091	0.003	5.05993e-09
TBC1D8B	1.42201e-13	0.379066	0.152	0.016	5.20469e-09
TMEM200B	1.42442e-13	0.194329	0.091	0.003	5.21353e-09
TBX19	1.42442e-13	0.164652	0.091	0.003	5.21353e-09
AC009041.2	1.42442e-13	0.128629	0.091	0.003	5.21353e-09
CALM2	1.43117e-13	0.469996	0.495	0.153	5.23821e-09
TRIM8	1.43642e-13	0.296544	0.283	0.058	5.25745e-09
DTX1	1.44587e-13	0.230223	0.091	0.003	5.29204e-09
SERTAD3	1.44587e-13	0.137151	0.091	0.003	5.29204e-09
TNIK	1.48847e-13	-1.37168	0.354	0.664	5.44794e-09
KIAA2026	1.5256e-13	0.699542	0.485	0.162	5.58383e-09
TMTC1	1.52961e-13	0.958431	0.636	0.271	5.59854e-09
GMPS	1.57697e-13	0.317034	0.273	0.054	5.77185e-09
PPA1	1.58616e-13	0.214922	0.202	0.03	5.8055e-09
AP3B1	1.60959e-13	0.698073	0.586	0.219	5.89126e-09
ATP6V0C	1.6525e-13	0.349672	0.263	0.051	6.0483e-09
IMPDH2	1.66046e-13	0.269609	0.152	0.016	6.07744e-09
COX10-AS1	1.76104e-13	0.724092	0.313	0.075	6.44558e-09
IFNGR1	1.76506e-13	0.469061	0.333	0.08	6.46029e-09
LINC01088	1.77039e-13	1.09883	0.253	0.051	6.47982e-09
SLC2A13	1.79734e-13	0.923754	0.677	0.295	6.57844e-09
CRIPT	1.80447e-13	0.423031	0.172	0.022	6.60454e-09
BUD31	1.84998e-13	0.28885	0.121	0.009	6.7711e-09
ACVRL1	1.86467e-13	0.293069	0.152	0.016	6.8249e-09
ATL1	1.87405e-13	0.409578	0.131	0.012	6.85919e-09
GPC3	1.88333e-13	0.832476	0.162	0.02	6.89317e-09
BBS9	1.88594e-13	1.01914	0.768	0.377	6.90273e-09
RALYL	1.90254e-13	-1.85657	0.152	0.509	6.96347e-09
CAPN7	1.90842e-13	0.627155	0.485	0.155	6.98499e-09
GNG7	1.96504e-13	-1.70615	0.162	0.526	7.19223e-09
TMEM135	2.01273e-13	0.952017	0.535	0.194	7.3668e-09
SLC30A7	2.02227e-13	0.659741	0.394	0.111	7.40172e-09
PKD1	2.02442e-13	0.425489	0.414	0.114	7.40956e-09
PHF3	2.03606e-13	0.604313	0.475	0.151	7.45217e-09
C1QTNF7	2.04316e-13	0.404814	0.131	0.012	7.47817e-09
NME7	2.08392e-13	0.745152	0.364	0.101	7.62737e-09
RPS13	2.09394e-13	0.331633	0.323	0.074	7.66404e-09
RCN2	2.14701e-13	0.427484	0.172	0.022	7.85828e-09
DDX17	2.15896e-13	0.709815	0.899	0.482	7.90199e-09
AIDA	2.16985e-13	0.253171	0.222	0.037	7.94185e-09
CNRIP1	2.17975e-13	0.371972	0.131	0.012	7.9781e-09
PRKCI	2.18604e-13	0.362286	0.333	0.08	8.00112e-09
BBS7	2.1889e-13	0.262983	0.141	0.014	8.01158e-09
ADAMTS10	2.1889e-13	0.404322	0.141	0.014	8.01158e-09
SLC41A2	2.27959e-13	0.326143	0.141	0.014	8.34354e-09
FBXO3	2.28332e-13	0.420119	0.343	0.085	8.35718e-09
RPL32	2.29298e-13	0.390005	0.434	0.122	8.39254e-09
POFUT2	2.30284e-13	0.2735	0.141	0.014	8.42862e-09
RASAL2	2.3159e-13	-1.3358	0.343	0.644	8.47644e-09
MTPN	2.34152e-13	0.338053	0.313	0.071	8.57018e-09
NFKB1	2.36847e-13	0.868653	0.455	0.147	8.66882e-09
FAM91A1	2.37796e-13	0.434828	0.273	0.057	8.70356e-09
PPP1R13B	2.40557e-13	-1.61621	0.263	0.572	8.80461e-09
ZCCHC3	2.44071e-13	0.171099	0.121	0.009	8.93324e-09
FKBP14	2.45385e-13	0.24552	0.131	0.012	8.98133e-09
CEP89	2.47089e-13	0.329393	0.192	0.028	9.04369e-09
MED29	2.49737e-13	0.24347	0.141	0.014	9.14064e-09
BHLHE41	2.53429e-13	0.252356	0.131	0.012	9.27577e-09
TAF2	2.53634e-13	0.478009	0.374	0.1	9.28325e-09
FOS	2.53788e-13	1.39408	0.808	0.54	9.2889e-09
PCGF2	2.57441e-13	0.226547	0.141	0.014	9.42261e-09
INSR	2.58828e-13	-1.29311	0.616	0.774	9.47335e-09
UBA2	2.60244e-13	0.486484	0.394	0.108	9.52518e-09
ERBIN	2.6049e-13	0.796018	0.657	0.269	9.53418e-09
UBA52	2.63222e-13	0.373756	0.374	0.095	9.63419e-09
TSPAN31	2.64562e-13	0.193931	0.131	0.012	9.68322e-09
RPL7A	2.72615e-13	0.29778	0.394	0.103	9.97797e-09
CDKL1	2.80789e-13	0.252894	0.172	0.022	1.02772e-08
IMMP2L	2.81554e-13	1.30279	0.859	0.589	1.03052e-08
AKAP11	2.87107e-13	0.391898	0.273	0.057	1.05084e-08
TP53BP1	2.87211e-13	0.396933	0.374	0.097	1.05122e-08
AL589843.1	2.88191e-13	0.559751	0.202	0.032	1.05481e-08
PDCL	2.93611e-13	0.176264	0.141	0.014	1.07465e-08
MME	3.00862e-13	0.365848	0.172	0.022	1.10118e-08
PPWD1	3.0111e-13	0.43887	0.253	0.05	1.10209e-08
TAF1B	3.15572e-13	0.350238	0.232	0.042	1.15502e-08
AC107375.1	3.19593e-13	0.224334	0.081	0.002	1.16974e-08
PUM3	3.29547e-13	0.633569	0.364	0.097	1.20617e-08
PAPOLG	3.31433e-13	0.414309	0.263	0.053	1.21308e-08
SRP9	3.33946e-13	0.305753	0.222	0.038	1.22227e-08
SLC25A13	3.37661e-13	0.559637	0.545	0.198	1.23587e-08
ACKR3	3.42062e-13	0.594792	0.253	0.05	1.25198e-08
VPS50	3.44473e-13	0.547756	0.354	0.094	1.26081e-08
AC156455.1	3.52034e-13	0.171471	0.081	0.002	1.28848e-08
RPL41	3.54146e-13	0.732261	0.586	0.218	1.29621e-08
PAXBP1	3.57517e-13	0.396898	0.404	0.114	1.30855e-08
HERC4	3.6315e-13	0.829619	0.687	0.321	1.32917e-08
PER3	3.71307e-13	0.909995	0.535	0.2	1.35902e-08
RFX1	3.77916e-13	0.289116	0.232	0.042	1.38321e-08
PHC3	3.78569e-13	0.628201	0.636	0.242	1.3856e-08
HSPA4L	3.79308e-13	0.520958	0.172	0.023	1.38831e-08
LRP10	3.91985e-13	0.532767	0.202	0.032	1.4347e-08
NCK2	3.92184e-13	0.538064	0.364	0.096	1.43543e-08
TUT7	3.98856e-13	0.45639	0.354	0.09	1.45985e-08
ARHGEF40	4.01406e-13	0.318814	0.162	0.02	1.46918e-08
RBM26	4.01424e-13	0.630311	0.586	0.216	1.46925e-08
PNPLA8	4.12736e-13	0.546233	0.424	0.125	1.51065e-08
NTRK1	4.18236e-13	0.175947	0.061	0	1.53079e-08
AC002546.1	4.18236e-13	0.128937	0.061	0	1.53079e-08
NR2C2AP	4.18236e-13	0.134303	0.061	0	1.53079e-08
SEH1L	4.22917e-13	0.375616	0.192	0.029	1.54792e-08
ETV5	4.23535e-13	0.269222	0.162	0.02	1.55018e-08
CRTAP	4.26956e-13	0.296534	0.222	0.038	1.5627e-08
MACROD2	4.26961e-13	-1.78883	0.141	0.505	1.56272e-08
AC104806.2	4.29692e-13	0.275907	0.202	0.031	1.57272e-08
EMP2	4.33693e-13	0.627409	0.515	0.169	1.58736e-08
ERO1A	4.45087e-13	0.387787	0.202	0.032	1.62906e-08
SFT2D1	4.53848e-13	0.309874	0.232	0.042	1.66113e-08
RYK	4.57913e-13	0.524926	0.394	0.112	1.67601e-08
CSTF1	4.80702e-13	0.246956	0.101	0.006	1.75942e-08
YWHAB	4.84085e-13	0.46963	0.343	0.087	1.7718e-08
RELL1	5.00045e-13	0.444943	0.323	0.079	1.83022e-08
ARID1B	5.124e-13	0.757396	0.919	0.644	1.87544e-08
SPATA18	5.33784e-13	0.355802	0.101	0.006	1.9537e-08
MNS1	5.33784e-13	0.43772	0.101	0.006	1.9537e-08
ZNF140	5.33951e-13	0.361383	0.192	0.029	1.95431e-08
SEC62	5.3528e-13	0.611676	0.535	0.185	1.95918e-08
LRRCC1	5.52795e-13	0.432505	0.152	0.017	2.02329e-08
MT-ND3	5.54951e-13	-0.720359	0.98	1	2.03118e-08
CAPN5	5.55052e-13	0.214978	0.071	0.001	2.03155e-08
AL021918.5	5.62442e-13	0.216145	0.101	0.006	2.05859e-08
AC127502.2	5.62442e-13	0.177317	0.101	0.006	2.05859e-08
LINC01748	5.65038e-13	0.30813	0.071	0.001	2.06809e-08
OSTF1	5.7152e-13	0.435464	0.212	0.036	2.09182e-08
LINC01091	5.71621e-13	1.02102	0.313	0.079	2.09219e-08
NME3	5.735e-13	0.206252	0.162	0.02	2.09907e-08
AP000547.3	5.752e-13	0.162024	0.071	0.001	2.10529e-08
AC113383.1	5.77332e-13	0.333722	0.101	0.006	2.11309e-08
DNAJC1	5.84236e-13	0.754494	0.636	0.26	2.13836e-08
CCDC171	5.85622e-13	0.872059	0.364	0.102	2.14343e-08
NEK3	5.90386e-13	0.345354	0.141	0.015	2.16087e-08
LUC7L2	6.02985e-13	0.697177	0.596	0.228	2.20699e-08
CBL	6.03493e-13	0.440877	0.323	0.079	2.20884e-08
RPH3AL	6.07984e-13	0.412431	0.141	0.015	2.22528e-08
MED7	6.16272e-13	0.171312	0.101	0.006	2.25562e-08
LINC01428	6.16361e-13	-1.71287	0.091	0.46	2.25594e-08
IL13RA1	6.18852e-13	0.424369	0.172	0.023	2.26506e-08
LINC00989	6.2e-13	0.52776	0.141	0.015	2.26926e-08
CYP4Z1	6.32559e-13	0.198108	0.101	0.006	2.31523e-08
BORCS7	6.33106e-13	0.274804	0.192	0.029	2.31723e-08
CAMK1D	6.33766e-13	0.93655	0.293	0.068	2.31965e-08
TNPO1	6.34509e-13	0.634916	0.475	0.159	2.32237e-08
PIKFYVE	6.44841e-13	0.475009	0.455	0.14	2.36018e-08
CMKLR1	6.59652e-13	0.324599	0.152	0.017	2.41439e-08
MIPOL1	6.64125e-13	0.879649	0.525	0.19	2.43076e-08
IKBKB	6.67118e-13	0.443023	0.222	0.039	2.44172e-08
SYNGAP1	6.72016e-13	0.270828	0.152	0.017	2.45965e-08
EFEMP2	6.78692e-13	0.236232	0.192	0.029	2.48408e-08
MCFD2	6.95261e-13	0.422502	0.222	0.039	2.54472e-08
KPNA1	6.96841e-13	0.507625	0.424	0.127	2.55051e-08
GALC	7.05377e-13	0.317929	0.242	0.046	2.58175e-08
ACTR2	7.13387e-13	0.480443	0.374	0.102	2.61107e-08
NR1D2	7.20472e-13	0.473927	0.384	0.107	2.637e-08
TMED7	7.26112e-13	0.32639	0.253	0.05	2.65764e-08
SLC27A6	7.26466e-13	-1.77813	0.081	0.437	2.65894e-08
PRPF38A	7.33127e-13	0.277874	0.192	0.029	2.68332e-08
PCM1	7.36176e-13	0.684824	0.717	0.313	2.69448e-08
USP42	7.49308e-13	0.593041	0.354	0.092	2.74254e-08
VPS4B	7.5588e-13	0.375332	0.232	0.043	2.7666e-08
CSNK1G3	7.58971e-13	0.754449	0.364	0.102	2.77791e-08
RPS11	7.64425e-13	0.601314	0.434	0.133	2.79787e-08
TASOR2	7.65227e-13	0.69455	0.515	0.176	2.80081e-08
SSR2	7.71212e-13	0.299853	0.212	0.036	2.82271e-08
LRRC37A3	7.8371e-13	0.26505	0.141	0.015	2.86846e-08
RETREG1	7.90388e-13	-1.63292	0.162	0.502	2.8929e-08
APC	8.16489e-13	0.732431	0.515	0.181	2.98843e-08
G2E3	8.24051e-13	0.486875	0.232	0.044	3.01611e-08
PRDX1	8.30267e-13	0.280563	0.202	0.032	3.03886e-08
PPIB	8.51914e-13	0.31513	0.212	0.036	3.11809e-08
RAD21	8.60692e-13	0.182362	0.323	0.075	3.15022e-08
DHX36	8.67096e-13	0.665734	0.394	0.118	3.17366e-08
NEDD4	8.84574e-13	0.731084	0.414	0.131	3.23763e-08
CYSTM1	8.85946e-13	0.593016	0.535	0.189	3.24265e-08
SPATS2	8.86313e-13	0.522754	0.455	0.139	3.24399e-08
NRDC	8.98037e-13	0.540151	0.515	0.176	3.2869e-08
AFTPH	9.0265e-13	0.65989	0.424	0.132	3.30379e-08
SNHG26	9.34526e-13	0.268457	0.111	0.008	3.42046e-08
MBD2	9.52119e-13	0.613084	0.414	0.123	3.48485e-08
CCS	9.534e-13	0.260562	0.222	0.039	3.48954e-08
GNPNAT1	9.61257e-13	0.282145	0.141	0.015	3.5183e-08
URI1	9.62675e-13	0.582575	0.394	0.112	3.52349e-08
EWSR1	9.62948e-13	0.406299	0.434	0.129	3.52449e-08
EID1	9.64328e-13	0.323256	0.283	0.061	3.52954e-08
VAV3	9.82989e-13	0.510294	0.253	0.051	3.59784e-08
PGLS	9.83153e-13	0.279415	0.131	0.013	3.59844e-08
SLC36A1	1.02726e-12	0.27743	0.111	0.008	3.75988e-08
PTBP2	1.03672e-12	0.847366	0.566	0.227	3.7945e-08
ZNF678	1.04626e-12	0.285468	0.232	0.043	3.82941e-08
SORBS3	1.05858e-12	0.186407	0.253	0.049	3.87452e-08
NHSL2	1.06376e-12	0.637946	0.202	0.034	3.89347e-08
ADCYAP1R1	1.07696e-12	0.454054	0.111	0.008	3.94178e-08
CWF19L2	1.08073e-12	0.533494	0.465	0.148	3.95558e-08
LINC01140	1.10269e-12	0.247492	0.111	0.008	4.03594e-08
AC005562.1	1.1151e-12	0.311382	0.212	0.036	4.08136e-08
PIP4K2A	1.12477e-12	0.500938	0.394	0.112	4.11678e-08
MYOC	1.12769e-12	0.415839	0.121	0.01	4.12745e-08
PCBP1	1.13262e-12	0.305361	0.232	0.043	4.14552e-08
TAF4B	1.14939e-12	0.444848	0.192	0.03	4.20689e-08
ACER2	1.16678e-12	0.2517	0.141	0.015	4.27053e-08
RASSF1	1.18469e-12	0.434188	0.192	0.03	4.33609e-08
C5	1.19465e-12	0.24202	0.131	0.013	4.37256e-08
CCBE1	1.19546e-12	0.944914	0.293	0.072	4.3755e-08
PCED1A	1.20413e-12	0.188602	0.121	0.01	4.40723e-08
DPY19L3	1.2137e-12	0.297857	0.212	0.036	4.44226e-08
MALRD1	1.26574e-12	0.776553	0.242	0.05	4.63272e-08
MFSD14B	1.28273e-12	0.345299	0.253	0.051	4.69492e-08
BTBD7	1.2973e-12	0.56677	0.525	0.18	4.74824e-08
CD38	1.31401e-12	0.367111	0.121	0.01	4.80939e-08
AC090578.1	1.3231e-12	0.894675	0.202	0.035	4.84269e-08
GBGT1	1.32841e-12	0.195892	0.121	0.01	4.86213e-08
PPM1L	1.35478e-12	-1.54513	0.273	0.585	4.95865e-08
IRF9	1.3577e-12	0.215893	0.121	0.01	4.96931e-08
NPIPA1	1.38948e-12	0.330096	0.162	0.021	5.08562e-08
IL16	1.39599e-12	0.748242	0.182	0.028	5.10945e-08
SARS	1.42966e-12	0.36632	0.232	0.044	5.23269e-08
RNF144A	1.48576e-12	0.468196	0.394	0.114	5.43803e-08
HNRNPA2B1	1.48801e-12	0.624878	0.808	0.382	5.44627e-08
GATAD1	1.50684e-12	0.530302	0.323	0.082	5.51518e-08
VASH1	1.55791e-12	0.218466	0.131	0.013	5.70209e-08
KLHL5	1.64726e-12	0.536706	0.242	0.049	6.02915e-08
RAMP1	1.66471e-12	-1.59354	0.061	0.418	6.09302e-08
ARSA	1.66943e-12	0.12616	0.121	0.01	6.11029e-08
SLC1A2	1.67218e-12	0.50749	0.152	0.019	6.12035e-08
CLIC1	1.67909e-12	0.169499	0.162	0.021	6.14565e-08
RPS15	1.67916e-12	0.413408	0.455	0.138	6.1459e-08
[truncated: 8,679 more rows]

## Sheet: Supplementary TableA2
gene	p_val	avg_log2FC	pct.1	pct.2	p_val_adj
FLI1	2.22849e-75	2.75175	0.694	0.076	8.1565e-71
XAF1	1.37743e-73	1.97516	0.645	0.058	5.04155e-69
RASGRF2	2.67188e-71	2.47774	0.661	0.072	9.77933e-67
APBB2	6.31735e-71	2.4773	0.879	0.192	2.31221e-66
DACH1	1.13266e-69	3.3717	0.79	0.153	4.14566e-65
ADGRL4	2.52376e-69	2.42748	0.685	0.087	9.23723e-65
AKT3	5.4469e-69	2.39591	0.863	0.184	1.99362e-64
PLEKHG1	8.72396e-68	3.00833	0.734	0.115	3.19306e-63
ADGRF5	1.20737e-67	2.27008	0.726	0.107	4.41908e-63
NEDD9	5.71313e-67	2.64967	0.758	0.131	2.09106e-62
GNAQ	6.98571e-67	2.51662	0.798	0.155	2.55684e-62
ELMO1	4.47315e-66	2.75543	0.79	0.159	1.63722e-61
TACC1	4.59018e-64	2.90176	0.879	0.228	1.68005e-59
NOTCH4	1.16613e-63	1.58032	0.476	0.028	4.26815e-59
PTPRB	1.59105e-63	2.0622	0.685	0.096	5.82339e-59
CADPS2	2.33005e-63	2.5312	0.726	0.124	8.52821e-59
RYR2	3.44883e-62	-2.76163	0.911	1	1.26231e-57
RASSF1	8.60257e-62	1.25082	0.484	0.03	3.14863e-57
LRRC8C	1.19043e-61	1.7759	0.581	0.059	4.35709e-57
RAPGEF5	1.24036e-61	2.18461	0.613	0.072	4.53985e-57
PTPN12	2.52835e-61	2.02621	0.79	0.151	9.25401e-57
PITPNC1	4.08875e-61	2.86261	0.806	0.174	1.49652e-56
TCF7L1	1.68458e-60	1.79062	0.645	0.081	6.16574e-56
TCF4	2.35829e-60	3.17773	0.927	0.399	8.63158e-56
BTNL9	7.99518e-60	2.75832	0.653	0.098	2.92631e-55
CPNE8	4.95095e-59	1.89762	0.581	0.065	1.8121e-54
LDB2	1.34311e-58	3.5262	0.871	0.297	4.91591e-54
RASIP1	2.1031e-58	1.44875	0.46	0.03	7.69755e-54
EBF1	4.63228e-58	2.69516	0.887	0.282	1.69546e-53
PLXNA2	1.13208e-57	2.00146	0.677	0.102	4.14353e-53
FGF12	1.73971e-57	-2.58459	0.702	0.994	6.3675e-53
PCAT19	1.80055e-57	1.34114	0.435	0.024	6.59018e-53
SLC2A3	2.78572e-57	2.72551	0.621	0.085	1.0196e-52
MALAT1	2.96627e-57	-1.28839	1	1	1.08568e-52
PREX2	3.4289e-57	2.35575	0.742	0.147	1.25501e-52
ASAP2	6.5441e-57	1.6598	0.677	0.098	2.39521e-52
PLCB1	6.56793e-57	3.29882	0.823	0.254	2.40393e-52
MYBPC3	8.07873e-57	-2.5446	0.379	0.98	2.9569e-52
TTN	8.65712e-57	-2.41965	0.976	1	3.16859e-52
FGD5	2.44176e-56	1.38752	0.492	0.039	8.93709e-52
EMCN	3.27344e-56	2.69876	0.766	0.188	1.19811e-51
ANO2	3.72651e-56	3.10325	0.742	0.17	1.36394e-51
TPM4	4.0184e-56	1.82527	0.645	0.089	1.47078e-51
SHANK3	8.15153e-56	1.81427	0.621	0.085	2.98354e-51
EFNB2	1.03352e-55	2.19991	0.516	0.051	3.78279e-51
ITGA1	1.38033e-55	2.78107	0.75	0.167	5.05214e-51
KITLG	5.02036e-55	1.92788	0.468	0.036	1.8375e-50
NEXN	1.18626e-54	-2.48627	0.355	0.969	4.34183e-50
TNNT2	3.45548e-54	-2.44523	0.371	0.964	1.26474e-49
CLMN	4.80816e-54	1.88205	0.508	0.05	1.75983e-49
CNTNAP3B	6.95382e-54	1.77826	0.476	0.041	2.54517e-49
MAP2	7.58069e-54	1.84085	0.484	0.044	2.77461e-49
PRKCH	8.86643e-54	2.2914	0.734	0.154	3.2452e-49
SRGAP2	1.067e-53	1.38525	0.476	0.039	3.90532e-49
LDB3	1.66879e-53	-2.36818	0.347	0.981	6.10795e-49
F8	2.19761e-53	2.60797	0.645	0.107	8.04347e-49
SLC8A1	3.38702e-53	-2.25583	0.661	0.993	1.23968e-48
UTRN	5.17928e-53	2.35063	0.976	0.49	1.89567e-48
RBM20	1.53088e-52	-2.56886	0.339	0.954	5.60316e-48
SORBS2	2.55793e-52	-2.15746	0.613	0.993	9.3623e-48
FLT1	2.72522e-52	3.7895	0.823	0.287	9.97458e-48
RFTN1	3.29399e-52	1.9838	0.677	0.122	1.20563e-47
CYYR1	4.22365e-52	2.41024	0.565	0.076	1.5459e-47
CCDC85A	6.49818e-52	2.69586	0.605	0.096	2.3784e-47
MYO1E	7.80553e-52	2.39652	0.79	0.204	2.8569e-47
LNX1	8.05358e-52	1.81836	0.411	0.028	2.94769e-47
HLA-E	1.63711e-51	2.04147	0.694	0.139	5.99198e-47
SRGAP2B	2.00481e-51	0.983134	0.363	0.016	7.3378e-47
PDGFB	2.11248e-51	1.30244	0.395	0.023	7.73188e-47
SGCD	4.99041e-51	-2.49277	0.435	0.963	1.82654e-46
MGLL	5.26279e-51	2.41857	0.758	0.175	1.92623e-46
SGIP1	6.50743e-51	1.93334	0.605	0.089	2.38179e-46
PPP1R16B	8.77089e-51	1.72765	0.452	0.039	3.21023e-46
ST8SIA6	2.04128e-50	2.43237	0.573	0.083	7.47128e-46
RBMS2	3.95854e-50	1.38848	0.605	0.085	1.44886e-45
PLXND1	1.51032e-49	1.24795	0.452	0.039	5.52793e-45
VWF	2.38801e-49	2.48151	0.734	0.182	8.74035e-45
PECAM1	5.35044e-49	1.68444	0.54	0.068	1.95831e-44
PLXDC2	1.49459e-48	2.76983	0.823	0.292	5.47033e-44
MYH7	1.7969e-48	-2.0261	0.54	0.984	6.57684e-44
EPAS1	1.84158e-48	2.50404	0.806	0.246	6.74036e-44
EPB41L2	2.19564e-48	1.97851	0.71	0.151	8.03626e-44
IFI16	2.87989e-48	1.27533	0.427	0.035	1.05407e-43
SEC14L1	3.76161e-48	2.28728	0.653	0.125	1.37679e-43
CTNNA3	6.74306e-48	-2.06194	0.621	0.973	2.46803e-43
PLSCR1	1.44826e-47	1.5397	0.484	0.052	5.30077e-43
LINC02208	1.82416e-47	-2.65819	0.395	0.917	6.6766e-43
TPO	1.94094e-47	1.58643	0.371	0.024	7.10402e-43
ANKRD1	2.21129e-47	-2.62066	0.266	0.905	8.09355e-43
CMYA5	2.35693e-47	-2.35017	0.355	0.926	8.62659e-43
ST6GALNAC3	3.68114e-47	3.20784	0.694	0.183	1.34733e-42
MEF2C	4.43796e-47	2.17519	0.911	0.401	1.62434e-42
CACNA1C	8.01587e-47	-1.80671	0.685	0.995	2.93389e-42
SYNE2	1.11225e-46	1.96467	0.911	0.384	4.07096e-42
SPECC1	1.1553e-46	1.55107	0.46	0.048	4.22853e-42
NLRC5	1.24528e-46	1.00021	0.323	0.014	4.55784e-42
IRAK3	1.44871e-46	1.38014	0.5	0.059	5.30241e-42
SHROOM4	1.50513e-46	1.3412	0.516	0.063	5.50894e-42
MYOM1	1.94095e-46	-2.0093	0.524	0.987	7.10408e-42
PALLD	2.22856e-46	-2.06954	0.5	0.972	8.15676e-42
DGKH	2.24088e-46	1.98928	0.677	0.144	8.20183e-42
MYOM2	2.43913e-46	-2.44566	0.315	0.874	8.92746e-42
DMD	2.69288e-46	-2.00366	0.71	0.983	9.8562e-42
ADAMTS9	4.55654e-46	2.86662	0.653	0.146	1.66774e-41
AKAP13	5.95903e-46	-1.80479	0.694	0.962	2.18106e-41
APOL3	6.40301e-46	0.895642	0.306	0.012	2.34356e-41
DOCK9	9.47557e-46	1.95528	0.774	0.214	3.46815e-41
CNOT6L	1.46568e-45	1.93674	0.605	0.107	5.36453e-41
ACTN2	3.54143e-45	-2.13129	0.403	0.928	1.2962e-40
MLIP	3.81306e-45	-2.54497	0.306	0.877	1.39562e-40
TNFRSF10D	4.84986e-45	1.02902	0.347	0.02	1.7751e-40
ENTPD1	7.39445e-45	1.56142	0.395	0.032	2.70644e-40
KLHL5	7.95979e-45	1.47811	0.452	0.049	2.91336e-40
LINC01695	1.22998e-44	1.9909	0.46	0.053	4.50184e-40
AC092353.2	1.24253e-44	-2.50057	0.266	0.9	4.54779e-40
DOCK6	2.47759e-44	1.57353	0.46	0.052	9.06823e-40
TRDN	5.2582e-44	-2.36555	0.331	0.87	1.92455e-39
FHOD3	8.80685e-44	-2.33311	0.331	0.892	3.2234e-39
SHE	9.09841e-44	0.892074	0.339	0.02	3.33011e-39
RAP1B	1.13838e-43	1.62633	0.718	0.171	4.1666e-39
ANKRD29	1.18732e-43	0.83757	0.331	0.019	4.34569e-39
IFI44	1.65863e-43	1.10872	0.355	0.024	6.07076e-39
PDE3A	1.81191e-43	-2.06517	0.524	0.962	6.63175e-39
ZC3HAV1	3.81268e-43	1.14942	0.46	0.052	1.39548e-38
CA8	4.08671e-43	1.9707	0.444	0.05	1.49578e-38
PXDNL	6.28733e-43	-2.45582	0.339	0.884	2.30123e-38
NEAT1	9.07605e-43	-1.28763	0.96	0.998	3.32192e-38
ARAP3	1.09843e-42	1.07802	0.395	0.035	4.02038e-38
LAMA2	2.54847e-42	-1.73228	0.605	0.983	9.32766e-38
RAPGEF1	2.63331e-42	2.53946	0.774	0.275	9.6382e-38
SRGN	2.93596e-42	1.68985	0.548	0.087	1.07459e-37
IFI44L	3.31552e-42	1.49627	0.403	0.038	1.21351e-37
CD93	5.4767e-42	1.16697	0.427	0.045	2.00453e-37
NEURL1B	5.67867e-42	1.6362	0.468	0.059	2.07845e-37
ANXA3	5.74089e-42	1.29707	0.395	0.037	2.10122e-37
MCTP1	6.76368e-42	2.32667	0.629	0.14	2.47557e-37
CDK17	6.94718e-42	1.99823	0.645	0.149	2.54274e-37
NR4A3	8.55768e-42	-2.4869	0.371	0.878	3.1322e-37
NLRP1	1.09495e-41	1.33287	0.427	0.046	4.00763e-37
ITPKB	1.10596e-41	1.37188	0.484	0.064	4.04792e-37
CMTM8	1.11193e-41	1.51666	0.411	0.043	4.06977e-37
IFNAR2	1.90173e-41	1.29455	0.468	0.059	6.96051e-37
KIAA0355	2.4168e-41	1.5882	0.637	0.134	8.84573e-37
SLC9C1	2.48886e-41	2.1586	0.46	0.063	9.10949e-37
NOVA2	6.87232e-41	0.879915	0.274	0.01	2.51534e-36
DGKE	6.96108e-41	0.884674	0.323	0.02	2.54783e-36
EGFL7	9.511e-41	1.68888	0.629	0.13	3.48112e-36
ACTR3	1.04452e-40	1.39994	0.597	0.11	3.82306e-36
SKAP2	1.33875e-40	1.14981	0.339	0.024	4.89996e-36
ETS1	1.76338e-40	1.72066	0.621	0.125	6.45416e-36
TEAD4	2.37978e-40	0.76116	0.258	0.008	8.71023e-36
DLL4	3.69699e-40	1.06711	0.339	0.024	1.35314e-35
STOM	4.07193e-40	1.96064	0.677	0.182	1.49037e-35
SVIL	5.03362e-40	-1.9558	0.387	0.898	1.84236e-35
HDGFL3	5.96608e-40	1.16573	0.452	0.057	2.18365e-35
MYO10	8.34383e-40	1.42082	0.452	0.058	3.05393e-35
FMNL3	8.78531e-40	0.930309	0.347	0.027	3.21551e-35
PARP14	9.90895e-40	1.00644	0.444	0.052	3.62678e-35
THSD4	1.08255e-39	-1.86983	0.476	0.927	3.96225e-35
TSPAN14	1.61368e-39	1.26391	0.46	0.06	5.90621e-35
ERG	2.68629e-39	1.46852	0.452	0.059	9.8321e-35
COBLL1	2.969e-39	1.88979	0.734	0.21	1.08669e-34
MECOM	4.69628e-39	3.70567	0.75	0.319	1.71889e-34
PDZRN3	4.85035e-39	-2.2584	0.29	0.853	1.77528e-34
CASC15	4.92539e-39	1.75982	0.589	0.118	1.80274e-34
RBMS3	6.46892e-39	1.76978	0.952	0.693	2.36769e-34
MEOX2	7.07806e-39	1.89643	0.492	0.075	2.59064e-34
KIAA1671	7.69544e-39	1.27629	0.5	0.076	2.81661e-34
DLG2	7.87526e-39	-1.76272	0.54	0.952	2.88242e-34
CTTNBP2NL	8.2623e-39	1.4432	0.484	0.072	3.02409e-34
TEK	1.06919e-38	1.2723	0.419	0.049	3.91335e-34
CHRM2	1.32552e-38	-2.38517	0.218	0.831	4.85152e-34
SPATA13	1.36774e-38	1.42182	0.411	0.049	5.00606e-34
EBF3	1.58528e-38	1.27856	0.411	0.049	5.80229e-34
SULF2	1.93062e-38	1.07317	0.395	0.042	7.06625e-34
SH2D3C	2.10004e-38	1.14519	0.371	0.036	7.68637e-34
CASP10	2.21078e-38	0.873423	0.29	0.016	8.09166e-34
NUMB	4.81142e-38	1.36424	0.742	0.196	1.76103e-33
MYL2	8.70289e-38	-2.07849	0.387	0.886	3.18534e-33
PODXL	8.98096e-38	1.33621	0.46	0.065	3.28712e-33
ARHGAP29	1.00944e-37	1.86158	0.702	0.207	3.69464e-33
ANK2	1.11905e-37	-2.18092	0.347	0.831	4.09583e-33
TNNI3K	1.53491e-37	-2.23586	0.298	0.835	5.61792e-33
PELI1	1.56221e-37	1.98983	0.508	0.093	5.71784e-33
DPYSL3	1.73256e-37	1.32076	0.411	0.049	6.34136e-33
CDH2	1.92593e-37	-2.32502	0.298	0.819	7.04909e-33
ESRRG	1.92768e-37	-2.35843	0.234	0.801	7.0555e-33
NHSL2	2.08777e-37	0.929313	0.363	0.034	7.64145e-33
SLFN11	2.40204e-37	1.15168	0.331	0.027	8.7917e-33
UACA	3.13493e-37	1.6547	0.718	0.209	1.14742e-32
GNAI2	3.23141e-37	1.0418	0.5	0.078	1.18273e-32
RUNDC3B	4.4576e-37	1.18011	0.274	0.015	1.63153e-32
AP001605.1	4.63886e-37	0.919339	0.21	0.003	1.69787e-32
DIPK2B	4.72689e-37	1.68861	0.484	0.078	1.73009e-32
PIK3R3	5.76679e-37	2.98507	0.694	0.221	2.1107e-32
C15orf41	7.62114e-37	-2.19221	0.371	0.855	2.78941e-32
ENG	8.26614e-37	1.60339	0.589	0.123	3.02549e-32
FRYL	1.04835e-36	1.85494	0.806	0.301	3.83705e-32
MFSD6	1.13687e-36	1.20049	0.339	0.03	4.16106e-32
MT-ND1	1.28639e-36	-1.49431	0.863	1	4.70832e-32
HLA-C	1.43019e-36	1.54501	0.597	0.13	5.23465e-32
TDRD10	1.52568e-36	0.885843	0.25	0.01	5.58412e-32
OSMR	1.75421e-36	1.20819	0.379	0.042	6.42058e-32
INPP5D	2.13467e-36	1.06344	0.387	0.043	7.81312e-32
BAIAP2L1	2.58878e-36	0.928904	0.323	0.025	9.47518e-32
CACNB2	3.05374e-36	-1.77658	0.484	0.918	1.1177e-31
LRRC32	3.08783e-36	0.864865	0.355	0.034	1.13018e-31
CNTLN	3.35238e-36	1.12185	0.5	0.08	1.227e-31
IGFBP4	3.91805e-36	1.31828	0.573	0.114	1.43404e-31
C22orf34	4.61096e-36	1.03567	0.339	0.03	1.68766e-31
AKAP6	4.97028e-36	-1.87764	0.419	0.883	1.81917e-31
MAML2	4.98086e-36	2.19487	0.742	0.264	1.82305e-31
FHL2	5.67517e-36	-2.40657	0.315	0.845	2.07717e-31
SLFN5	6.3034e-36	0.88282	0.363	0.037	2.30711e-31
RNASE1	6.36661e-36	1.28461	0.468	0.073	2.33024e-31
NOTCH1	8.23973e-36	0.77819	0.331	0.028	3.01582e-31
PICALM	9.75291e-36	1.97295	0.863	0.411	3.56966e-31
RBFOX1	1.06965e-35	-2.04023	0.298	0.834	3.91504e-31
RTN4	1.10318e-35	1.51744	0.629	0.146	4.03776e-31
DNM3	1.59669e-35	1.54752	0.516	0.095	5.84404e-31
SAMD4A	1.87723e-35	-1.61165	0.556	0.914	6.87083e-31
CHSY3	3.62535e-35	2.50068	0.403	0.058	1.32691e-30
HMCN1	4.22004e-35	2.32527	0.516	0.102	1.54458e-30
PCED1B	4.38749e-35	1.52091	0.339	0.034	1.60586e-30
CD2AP	7.54154e-35	1.49709	0.589	0.134	2.76028e-30
SEMA6A	7.55285e-35	1.49904	0.468	0.078	2.76442e-30
PCDH7	7.78711e-35	-2.28502	0.315	0.819	2.85016e-30
ST8SIA4	9.76071e-35	1.57134	0.355	0.039	3.57252e-30
GRB10	1.03065e-34	2.15484	0.613	0.162	3.7723e-30
SP140L	1.34499e-34	0.788881	0.298	0.022	4.9228e-30
LPL	1.91945e-34	-1.95478	0.452	0.863	7.02539e-30
YES1	1.99137e-34	1.33802	0.516	0.095	7.28862e-30
TECRL	2.83645e-34	-2.39699	0.282	0.78	1.03817e-29
PELI2	3.66379e-34	1.49461	0.379	0.046	1.34098e-29
VEGFC	5.31494e-34	2.58618	0.444	0.075	1.94532e-29
TRDN-AS1	5.82094e-34	-2.13317	0.266	0.806	2.13052e-29
PXDN	6.03201e-34	0.992564	0.363	0.041	2.20778e-29
SRGAP2C	6.77348e-34	0.704594	0.266	0.016	2.47916e-29
RHOC	7.25968e-34	0.762402	0.379	0.044	2.65712e-29
SPAAR	9.92033e-34	0.812657	0.306	0.025	3.63094e-29
GIMAP5	1.01861e-33	0.77844	0.242	0.012	3.72823e-29
SASH1	1.27362e-33	1.62862	0.774	0.283	4.66157e-29
HLA-A	2.1024e-33	1.38823	0.565	0.119	7.695e-29
EVA1C	2.39349e-33	1.65891	0.677	0.188	8.7604e-29
RHOJ	2.3989e-33	1.28576	0.452	0.072	8.7802e-29
PRAG1	3.05213e-33	1.22672	0.29	0.023	1.11711e-28
EMP1	4.16738e-33	1.60174	0.524	0.107	1.5253e-28
ADCY4	4.97172e-33	0.760058	0.282	0.021	1.8197e-28
MMRN2	4.9718e-33	0.723501	0.306	0.027	1.81973e-28
CDH5	5.61682e-33	1.06622	0.403	0.056	2.05581e-28
HLA-F	6.19731e-33	0.74378	0.298	0.024	2.26828e-28
APOLD1	7.59934e-33	1.25368	0.46	0.075	2.78143e-28
EHD2	8.5828e-33	0.94177	0.452	0.071	3.14139e-28
TNFRSF1B	1.14249e-32	0.933886	0.298	0.025	4.18164e-28
CACHD1	1.19484e-32	1.16381	0.371	0.048	4.37323e-28
JCAD	1.83977e-32	0.764625	0.323	0.031	6.73375e-28
LINC01197	1.92577e-32	1.17542	0.25	0.015	7.0485e-28
MT-CYB	2.20013e-32	-1.37229	0.895	1	8.0527e-28
NRARP	2.22748e-32	0.798775	0.234	0.012	8.1528e-28
TSPAN7	2.71914e-32	1.14596	0.29	0.024	9.95233e-28
RFX3	3.34124e-32	1.54813	0.573	0.141	1.22293e-27
ELK3	3.59351e-32	1.20096	0.387	0.052	1.31526e-27
TMEM178B	5.55066e-32	-2.19913	0.258	0.76	2.0316e-27
JAG2	6.8242e-32	0.60227	0.226	0.01	2.49773e-27
PRKD2	7.46872e-32	1.0987	0.363	0.044	2.73363e-27
AC097522.2	7.53065e-32	-1.91438	0.306	0.826	2.75629e-27
LMOD2	9.12726e-32	-2.32841	0.218	0.729	3.34067e-27
ROCK2	9.2329e-32	1.41569	0.774	0.271	3.37933e-27
MOV10	9.5799e-32	0.650604	0.242	0.014	3.50634e-27
ARHGEF15	1.00405e-31	0.849919	0.274	0.021	3.67492e-27
LARGE1	1.10198e-31	-1.54835	0.573	0.913	4.03337e-27
SORBS1	1.16982e-31	-1.18433	0.774	0.973	4.28167e-27
ARPC2	1.18651e-31	1.17514	0.589	0.136	4.34273e-27
MCAM	1.25528e-31	1.07593	0.323	0.034	4.59445e-27
MX1	1.35901e-31	0.817224	0.274	0.021	4.97411e-27
JAG1	1.94192e-31	1.04153	0.371	0.048	7.10764e-27
TENM2	2.0388e-31	-1.74661	0.339	0.868	7.46221e-27
VAV3	2.20394e-31	1.54476	0.371	0.051	8.06662e-27
ABCB1	2.20776e-31	2.27061	0.419	0.072	8.08061e-27
RALGAPA2	2.45585e-31	1.75678	0.726	0.257	8.98865e-27
MYL3	2.8486e-31	-1.95648	0.266	0.775	1.04262e-26
BCAM	3.6312e-31	0.881447	0.347	0.042	1.32906e-26
MAMLD1	3.66214e-31	0.956956	0.315	0.032	1.34038e-26
MYO18B	3.84098e-31	-1.86688	0.29	0.815	1.40584e-26
EEPD1	4.27079e-31	1.80135	0.573	0.145	1.56315e-26
AC018816.1	5.55787e-31	1.28591	0.355	0.046	2.03423e-26
KLF7	5.58642e-31	1.39836	0.637	0.174	2.04468e-26
ERBB4	6.83174e-31	-1.89152	0.298	0.797	2.50048e-26
JMJD1C	6.92642e-31	1.53866	0.976	0.651	2.53514e-26
CCNL1	8.33781e-31	1.05085	0.516	0.104	3.05172e-26
KDR	9.20354e-31	0.90971	0.274	0.022	3.36859e-26
CDH13	9.89556e-31	-1.18768	0.79	0.977	3.62187e-26
LINC00639	1.07996e-30	2.6538	0.452	0.096	3.95277e-26
AC011287.1	1.29387e-30	-2.28339	0.306	0.771	4.73569e-26
PPP1R12B	1.38764e-30	-1.49251	0.621	0.893	5.07891e-26
NFKBIA	1.45844e-30	1.19372	0.339	0.042	5.33805e-26
PTK2	1.64619e-30	1.40711	0.911	0.508	6.02521e-26
HLA-B	1.6591e-30	1.65955	0.685	0.226	6.07248e-26
DES	1.71816e-30	-1.87167	0.298	0.791	6.28862e-26
CCNY	1.89983e-30	1.58938	0.903	0.446	6.95357e-26
ID3	1.97714e-30	1.04934	0.403	0.061	7.23652e-26
MCF2L	2.11075e-30	1.4241	0.5	0.104	7.72556e-26
ID1	2.46894e-30	1.44032	0.427	0.074	9.03655e-26
TNNI3	2.53742e-30	-1.61271	0.363	0.881	9.28722e-26
GBP4	2.6771e-30	0.631794	0.234	0.014	9.79847e-26
GJA4	2.93738e-30	0.613	0.218	0.01	1.07511e-25
PDLIM5	3.73183e-30	-1.25819	0.815	0.955	1.36589e-25
IFIH1	4.03845e-30	0.781626	0.25	0.017	1.47811e-25
TMOD3	4.265e-30	1.11639	0.516	0.11	1.56103e-25
TPST1	4.28096e-30	1.21642	0.419	0.07	1.56687e-25
TANC2	4.99649e-30	1.40317	0.435	0.079	1.82877e-25
ESAM	5.02556e-30	0.941004	0.355	0.046	1.83941e-25
AC090630.1	5.17162e-30	0.988826	0.258	0.02	1.89286e-25
MT-ATP6	5.21875e-30	-1.25171	0.968	1	1.91012e-25
CPEB4	5.24141e-30	-1.82259	0.419	0.803	1.91841e-25
NEDD4	5.63427e-30	1.24728	0.556	0.131	2.0622e-25
SLC9A3R2	6.0429e-30	1.20192	0.5	0.102	2.21176e-25
STIM2	6.335e-30	1.11952	0.387	0.058	2.31867e-25
EPHA4	9.42574e-30	1.22507	0.427	0.073	3.44992e-25
PRKD1	9.48187e-30	1.99043	0.508	0.124	3.47046e-25
RAMP2	9.51447e-30	0.83056	0.315	0.034	3.48239e-25
TMTC1	1.0149e-29	2.10601	0.71	0.271	3.71465e-25
HLA-DRB1	1.16853e-29	0.920804	0.331	0.039	4.27694e-25
ITGA6	1.25703e-29	1.79506	0.54	0.133	4.60085e-25
SWAP70	1.31485e-29	0.959656	0.387	0.058	4.81247e-25
FKBP1A	1.41048e-29	0.955689	0.387	0.058	5.16251e-25
CCSER1	1.43963e-29	-1.84753	0.395	0.812	5.26917e-25
PPA1	1.51302e-29	0.820107	0.298	0.03	5.5378e-25
NTRK2	1.8654e-29	1.02905	0.25	0.019	6.82754e-25
CMIP	1.9188e-29	1.03519	0.508	0.107	7.02301e-25
ARL15	2.29591e-29	2.47886	0.879	0.581	8.40325e-25
CPAMD8	2.46777e-29	0.926173	0.315	0.035	9.03227e-25
CD74	2.60639e-29	1.51359	0.468	0.094	9.53963e-25
CRYBG3	3.31476e-29	1.45248	0.597	0.169	1.21324e-24
BST2	4.27485e-29	0.913529	0.331	0.041	1.56464e-24
HES4	4.6306e-29	0.613808	0.25	0.019	1.69485e-24
IFITM3	4.7437e-29	1.2446	0.548	0.13	1.73624e-24
NBL1	4.87074e-29	0.816075	0.258	0.021	1.78274e-24
MSN	5.2962e-29	1.39074	0.653	0.196	1.93846e-24
A2M	5.70504e-29	1.84533	0.653	0.233	2.0881e-24
FEZ2	6.54891e-29	1.03444	0.363	0.053	2.39697e-24
AL139807.1	7.11661e-29	0.706513	0.258	0.021	2.60475e-24
CCND3	7.83182e-29	1.12988	0.5	0.105	2.86653e-24
NDRG1	8.61285e-29	1.52269	0.524	0.123	3.15239e-24
ABLIM3	8.97465e-29	2.20407	0.669	0.242	3.28481e-24
MIR1-1HG	1.1353e-28	-1.96586	0.218	0.76	4.15531e-24
PDE9A	1.24246e-28	0.641827	0.242	0.017	4.54754e-24
KLF2	1.26824e-28	1.49685	0.468	0.102	4.64188e-24
ICAM2	1.6228e-28	0.659547	0.258	0.021	5.93961e-24
AC008514.1	1.63478e-28	0.657437	0.202	0.009	5.98344e-24
DENND3	1.77841e-28	1.0107	0.403	0.07	6.50914e-24
RAPGEF2	2.1216e-28	1.52425	0.927	0.561	7.76528e-24
LDLR	2.54245e-28	0.717036	0.282	0.028	9.30563e-24
FARP1	2.56524e-28	1.1848	0.411	0.072	9.38902e-24
EFNA5	2.61899e-28	-1.98261	0.25	0.745	9.58577e-24
EPB41L4A	3.01854e-28	1.58017	0.645	0.211	1.10482e-23
BHLHE40	3.05713e-28	1.22449	0.468	0.094	1.11894e-23
IFI27	3.15977e-28	0.962975	0.419	0.072	1.15651e-23
MYO1B	3.28711e-28	1.41174	0.403	0.07	1.20312e-23
S1PR1	3.32161e-28	0.597286	0.25	0.02	1.21574e-23
ACOT11	3.36207e-28	-1.85671	0.21	0.737	1.23055e-23
LRCH1	3.68791e-28	1.53492	0.621	0.184	1.34981e-23
TBC1D9	4.12321e-28	1.27331	0.468	0.096	1.50914e-23
FUT8	4.65152e-28	1.94882	0.508	0.131	1.7025e-23
TM4SF1	5.888e-28	1.19541	0.452	0.086	2.15507e-23
LINC01697	5.9925e-28	0.741538	0.242	0.019	2.19332e-23
GNB1	6.16616e-28	1.29844	0.694	0.233	2.25688e-23
HERC1	6.41227e-28	1.56379	0.839	0.397	2.34695e-23
MAP3K1	6.42787e-28	1.00542	0.411	0.072	2.35267e-23
FYN	6.86822e-28	1.50655	0.677	0.212	2.51384e-23
RAPGEF3	7.4571e-28	0.833461	0.274	0.027	2.72937e-23
TIE1	7.55175e-28	0.85268	0.306	0.036	2.76402e-23
KBTBD2	8.27647e-28	0.743381	0.347	0.048	3.02927e-23
NCALD	8.4235e-28	1.7152	0.734	0.301	3.08308e-23
JUNB	8.60703e-28	1.44821	0.589	0.165	3.15026e-23
SPNS2	8.70796e-28	0.72543	0.177	0.006	3.1872e-23
PIK3C2A	8.78212e-28	1.14938	0.573	0.145	3.21434e-23
TACC2	1.16725e-27	-1.68368	0.411	0.813	4.27227e-23
PPP3CA	1.19295e-27	1.67773	0.629	0.204	4.36633e-23
DICER1	1.31826e-27	1.01844	0.556	0.133	4.82497e-23
PDE1C	1.45033e-27	-1.44994	0.516	0.885	5.30834e-23
GALNT18	1.67643e-27	2.00857	0.726	0.316	6.13589e-23
MYCT1	1.77778e-27	0.79639	0.282	0.029	6.50686e-23
SOX7	1.81842e-27	0.522424	0.226	0.015	6.65562e-23
RIMKLB	1.85279e-27	1.38654	0.371	0.06	6.78139e-23
FHIT	1.9178e-27	-1.71263	0.46	0.823	7.01935e-23
PHACTR2	2.11056e-27	1.66581	0.815	0.365	7.72485e-23
NCAM1	2.3246e-27	-1.96593	0.242	0.723	8.50828e-23
ADAMTS9-AS2	2.4997e-27	2.05002	0.629	0.221	9.14917e-23
ETS2	2.51375e-27	1.33107	0.427	0.082	9.20058e-23
SPRED1	2.54484e-27	1.39796	0.411	0.078	9.31435e-23
NAB1	2.73885e-27	0.708889	0.363	0.053	1.00245e-22
GRK5	2.93768e-27	1.42805	0.565	0.158	1.07522e-22
TINAGL1	2.97051e-27	0.677654	0.339	0.046	1.08724e-22
KLHL2	3.5462e-27	0.663066	0.282	0.03	1.29794e-22
XIRP2	3.68045e-27	-2.03525	0.274	0.72	1.34708e-22
CDC37	4.40487e-27	0.66745	0.363	0.053	1.61223e-22
AFDN	5.18813e-27	1.9483	0.71	0.297	1.89891e-22
TCF15	6.28949e-27	0.688723	0.25	0.022	2.30202e-22
RNF144B	6.38601e-27	1.35426	0.331	0.046	2.33734e-22
L3MBTL4	7.10466e-27	1.35113	0.379	0.065	2.60038e-22
CCDC88C	7.14904e-27	0.613623	0.242	0.02	2.61662e-22
GULP1	7.2625e-27	1.00331	0.298	0.036	2.65815e-22
PTBP3	8.4326e-27	1.0796	0.476	0.101	3.08641e-22
MYH7B	9.30054e-27	-1.87122	0.234	0.724	3.40409e-22
PLEKHA5	1.00692e-26	-1.51373	0.444	0.839	3.68541e-22
GRASP	1.02719e-26	0.720157	0.363	0.054	3.75962e-22
RUFY3	1.09739e-26	1.1255	0.597	0.162	4.01655e-22
RPL18	1.1804e-26	0.92244	0.411	0.075	4.32038e-22
DISC1	1.26216e-26	1.13497	0.435	0.087	4.61964e-22
CDC42BPA	1.3638e-26	1.30877	0.895	0.523	4.99164e-22
SOCS3	1.38458e-26	0.782704	0.266	0.027	5.06771e-22
HLA-DRB5	1.42033e-26	0.782392	0.298	0.036	5.19855e-22
ASS1	1.46033e-26	0.48526	0.25	0.022	5.34496e-22
PPP1R12A	1.4724e-26	1.40327	0.766	0.343	5.38914e-22
ZNF366	1.55958e-26	1.14582	0.25	0.023	5.7082e-22
LAMA3	1.84351e-26	1.04589	0.306	0.039	6.74743e-22
PLSCR4	1.87455e-26	0.785866	0.306	0.038	6.86104e-22
KAT6A	1.87939e-26	1.41343	0.71	0.269	6.87875e-22
CLDN5	1.93147e-26	0.937538	0.331	0.046	7.06939e-22
B2M	2.0676e-26	1.69718	0.718	0.294	7.56761e-22
TSC22D3	2.07651e-26	0.921715	0.395	0.068	7.60022e-22
KIAA1324L	2.706e-26	1.15391	0.355	0.058	9.90421e-22
MT-ND5	2.78946e-26	-1.40087	0.702	0.948	1.02097e-21
CASP4	2.90861e-26	0.645453	0.242	0.021	1.06458e-21
SLC35G2	3.31785e-26	0.50319	0.169	0.006	1.21437e-21
PTMA	3.90915e-26	1.13756	0.54	0.138	1.43079e-21
DENND2A	4.00297e-26	1.33026	0.395	0.073	1.46513e-21
NIBAN1	4.4083e-26	-1.67988	0.395	0.812	1.61348e-21
SLCO4A1	4.60053e-26	0.358295	0.137	0.001	1.68384e-21
ZFP36L1	4.60999e-26	1.08685	0.524	0.13	1.6873e-21
ZBTB46	4.87492e-26	1.11376	0.556	0.145	1.78427e-21
PDE4DIP	5.08091e-26	-1.66146	0.29	0.742	1.85966e-21
ARHGEF7	5.11512e-26	1.43953	0.71	0.255	1.87218e-21
TAGLN2	5.49554e-26	0.895871	0.427	0.081	2.01142e-21
WARS	5.58312e-26	1.69142	0.444	0.098	2.04348e-21
NRAP	7.17056e-26	-1.85385	0.258	0.708	2.6245e-21
NOD1	7.38669e-26	0.769495	0.363	0.058	2.7036e-21
CFAP161	9.44842e-26	0.907372	0.218	0.016	3.45822e-21
GALNT17	9.74373e-26	-1.58879	0.282	0.808	3.5663e-21
AL136962.1	1.05692e-25	1.16062	0.226	0.019	3.86842e-21
TJP1	1.065e-25	1.26497	0.815	0.399	3.89801e-21
STX12	1.18075e-25	1.0083	0.476	0.109	4.32167e-21
ZNF423	1.33562e-25	0.732866	0.331	0.048	4.88852e-21
PDLIM1	1.42013e-25	1.57041	0.581	0.18	5.19782e-21
ECE1	1.63621e-25	0.972766	0.427	0.085	5.9887e-21
PSD3	1.73957e-25	-1.63513	0.508	0.817	6.36701e-21
KRAS	1.76458e-25	0.692138	0.306	0.041	6.45855e-21
DPF3	2.11383e-25	-1.85321	0.266	0.7	7.73682e-21
CARD8	2.1375e-25	0.943188	0.379	0.067	7.82348e-21
LEPR	2.15294e-25	0.899846	0.347	0.054	7.87997e-21
ARHGAP6	2.25945e-25	1.92599	0.379	0.074	8.26982e-21
SEMA6B	2.30687e-25	0.610226	0.202	0.013	8.44339e-21
CXCL2	2.75929e-25	1.61215	0.323	0.05	1.00993e-20
CBL	3.1734e-25	0.88775	0.411	0.079	1.1615e-20
NECTIN2	3.61422e-25	1.00501	0.435	0.09	1.32284e-20
PRKX	4.38027e-25	0.862703	0.25	0.025	1.60322e-20
PAN3	4.52448e-25	1.21254	0.661	0.219	1.65601e-20
TSPAN15	4.67791e-25	0.533136	0.194	0.012	1.71216e-20
CDKN1C	4.86203e-25	1.01379	0.347	0.056	1.77955e-20
ELOVL7	5.28946e-25	0.68836	0.169	0.007	1.93599e-20
SEMA4C	5.52684e-25	0.557448	0.194	0.012	2.02288e-20
TCIM	6.15219e-25	0.914332	0.29	0.037	2.25176e-20
LCP2	6.60748e-25	0.828404	0.218	0.017	2.4184e-20
GMDS	6.686e-25	1.47405	0.565	0.173	2.44714e-20
MGAT1	6.92329e-25	0.744262	0.315	0.044	2.53399e-20
FLNB	7.26502e-25	1.16639	0.403	0.079	2.65907e-20
ZNF251	7.56034e-25	0.888093	0.355	0.059	2.76716e-20
KMT2E	7.93464e-25	1.2269	0.758	0.327	2.90416e-20
SP110	8.43552e-25	0.69079	0.25	0.025	3.08749e-20
CCDC68	8.57124e-25	0.783909	0.218	0.017	3.13716e-20
ZEB1	1.1121e-24	1.48905	0.847	0.51	4.07041e-20
SHISA5	1.24969e-24	0.648115	0.274	0.032	4.57401e-20
MT-ND4	1.51958e-24	-1.05015	0.96	1	5.5618e-20
MTUS2	2.39935e-24	-1.95734	0.218	0.667	8.78186e-20
F11R	2.65109e-24	0.400983	0.202	0.014	9.70327e-20
TNS2	2.68553e-24	0.69604	0.339	0.053	9.8293e-20
WIPF1	2.85824e-24	1.11747	0.524	0.141	1.04614e-19
AP001528.1	3.02784e-24	0.99788	0.347	0.058	1.10822e-19
AQP1	3.41846e-24	1.63894	0.427	0.098	1.25119e-19
KLF4	3.41889e-24	0.895336	0.339	0.054	1.25135e-19
RPL3	3.67286e-24	0.747741	0.379	0.068	1.3443e-19
H3F3B	4.20572e-24	0.90088	0.411	0.082	1.53934e-19
SPARCL1	4.46482e-24	1.66406	0.79	0.393	1.63417e-19
PXN	4.69772e-24	0.733941	0.435	0.092	1.71941e-19
OSBPL10	5.02874e-24	0.744967	0.29	0.038	1.84057e-19
CALCRL	5.97279e-24	1.77331	0.435	0.101	2.1861e-19
CPNE2	5.98326e-24	0.49848	0.169	0.008	2.18993e-19
GATA2	7.50449e-24	0.526655	0.169	0.008	2.74672e-19
LMO7	7.63957e-24	-1.69971	0.258	0.696	2.79616e-19
TPM1	8.17087e-24	-1.16098	0.734	0.907	2.99062e-19
GIMAP8	8.62489e-24	0.583313	0.258	0.029	3.1568e-19
PLCXD3	8.73952e-24	-1.90826	0.234	0.683	3.19875e-19
KSR1	9.39212e-24	0.602808	0.266	0.031	3.43761e-19
TLE1	9.53816e-24	0.846677	0.315	0.048	3.49106e-19
TRIP12	9.86526e-24	1.06041	0.677	0.233	3.61078e-19
NEBL	9.92725e-24	-1.01365	0.532	0.95	3.63347e-19
LRMDA	1.01723e-23	1.75448	0.903	0.692	3.72317e-19
ADAM15	1.0362e-23	0.507332	0.242	0.024	3.79259e-19
MYOZ2	1.06977e-23	-1.9252	0.274	0.669	3.91547e-19
TMEM204	1.08514e-23	0.474018	0.202	0.015	3.97173e-19
CDH23	1.1967e-23	0.819484	0.298	0.043	4.38004e-19
SH3BGRL	1.19969e-23	1.00027	0.371	0.07	4.39098e-19
MT-ND2	1.22006e-23	-1.03444	0.879	1	4.46554e-19
TMTC2	1.25072e-23	1.5819	0.444	0.108	4.57776e-19
FGF2	1.34911e-23	0.492068	0.226	0.021	4.93786e-19
FOXN3	1.35679e-23	1.59513	0.911	0.583	4.96598e-19
ACSL5	1.49065e-23	0.324644	0.161	0.007	5.45594e-19
RAB14	1.49993e-23	0.760853	0.387	0.074	5.48989e-19
PARP9	1.70135e-23	0.815591	0.306	0.045	6.2271e-19
NPDC1	1.75713e-23	0.734159	0.355	0.061	6.43127e-19
EGFR	1.82476e-23	1.29476	0.492	0.13	6.67881e-19
RIT1	1.86883e-23	0.492959	0.226	0.021	6.84011e-19
EML4	2.15683e-23	1.09449	0.452	0.109	7.8942e-19
ALPL	2.21512e-23	0.723255	0.194	0.014	8.10757e-19
CD9	2.52835e-23	0.720667	0.331	0.053	9.25401e-19
CD34	2.61044e-23	0.916445	0.355	0.064	9.55447e-19
CD59	2.78236e-23	1.10918	0.54	0.153	1.01837e-18
HOTAIRM1	2.91693e-23	0.31668	0.113	0	1.06762e-18
CLEC1A	3.09773e-23	0.915105	0.242	0.027	1.1338e-18
OBSCN	3.14076e-23	-1.55015	0.29	0.751	1.14955e-18
AKAP12	3.26185e-23	1.45874	0.363	0.07	1.19387e-18
AIF1L	3.32522e-23	0.64123	0.194	0.014	1.21706e-18
DOCK1	3.3504e-23	1.18942	0.774	0.326	1.22628e-18
NKTR	4.76628e-23	1.19866	0.669	0.233	1.74451e-18
AL359220.1	4.86907e-23	0.550716	0.145	0.005	1.78213e-18
EXOC1	4.98607e-23	0.731448	0.355	0.064	1.82495e-18
ELOVL5	5.14329e-23	1.13031	0.629	0.209	1.8825e-18
RHOA	5.37406e-23	0.976748	0.556	0.158	1.96696e-18
FABP4	5.53404e-23	1.02117	0.315	0.051	2.02551e-18
SLC16A7	6.10193e-23	-1.86455	0.234	0.659	2.23337e-18
WDR45B	6.11334e-23	0.84543	0.347	0.061	2.23755e-18
SLC1A1	6.23602e-23	0.788237	0.185	0.013	2.28245e-18
RPS19	6.23967e-23	1.0006	0.468	0.111	2.28378e-18
EPS8	6.2923e-23	2.18182	0.476	0.132	2.30304e-18
THSD7A	6.64118e-23	1.48996	0.347	0.065	2.43074e-18
NCK2	6.67906e-23	0.836718	0.435	0.096	2.4446e-18
SPHKAP	6.96543e-23	-1.91707	0.25	0.671	2.54942e-18
CSRNP1	6.99266e-23	0.664664	0.226	0.022	2.55938e-18
PCDH17	7.05282e-23	1.23199	0.266	0.035	2.5814e-18
TES	7.6438e-23	0.730444	0.282	0.039	2.79771e-18
ALPK1	7.94286e-23	0.795386	0.298	0.044	2.90717e-18
DLEU2	9.72285e-23	1.39237	0.702	0.295	3.55866e-18
WT1-AS	9.90937e-23	0.556132	0.169	0.009	3.62693e-18
LMOD1	1.02545e-22	1.06377	0.218	0.021	3.75324e-18
SEPTIN7	1.42172e-22	1.06669	0.597	0.191	5.20363e-18
PPARGC1A	1.48027e-22	-2.0124	0.185	0.618	5.41795e-18
LINC00989	1.50026e-22	0.66789	0.194	0.015	5.49112e-18
SEPTIN11	1.79154e-22	0.916991	0.331	0.057	6.55722e-18
MITF	1.91419e-22	-1.7502	0.258	0.674	7.00614e-18
ITPR2	1.9367e-22	1.46527	0.75	0.358	7.0885e-18
TMSB10	2.31652e-22	1.31403	0.548	0.173	8.47871e-18
LDLRAD3	2.56309e-22	0.739284	0.242	0.028	9.38118e-18
KLF6	2.60756e-22	0.893632	0.46	0.11	9.54392e-18
CCNH	2.86807e-22	1.41366	0.685	0.289	1.04974e-17
ADCY5	2.92603e-22	-1.61788	0.363	0.753	1.07096e-17
CYFIP1	2.94378e-22	0.91525	0.444	0.105	1.07745e-17
RPS28	2.96065e-22	1.14708	0.516	0.146	1.08363e-17
SH3BP4	3.03669e-22	0.593596	0.226	0.023	1.11146e-17
DOCK4	3.27943e-22	1.71004	0.758	0.411	1.2003e-17
CDC14A	3.63717e-22	0.905259	0.395	0.083	1.33124e-17
CD200	3.64005e-22	0.57006	0.153	0.007	1.33229e-17
COL4A1	3.69545e-22	1.6323	0.702	0.292	1.35257e-17
CNRIP1	3.73222e-22	0.46013	0.177	0.012	1.36603e-17
CD46	3.7989e-22	1.05571	0.46	0.111	1.39043e-17
ARID5A	3.84179e-22	0.622139	0.258	0.032	1.40613e-17
RB1	3.92549e-22	1.05746	0.653	0.234	1.43677e-17
EPSTI1	4.01222e-22	0.785153	0.25	0.03	1.46851e-17
TTC13	4.11856e-22	0.750969	0.274	0.038	1.50743e-17
PRKD3	4.18981e-22	0.765343	0.331	0.058	1.53351e-17
RAB6A	4.25421e-22	0.943639	0.492	0.131	1.55708e-17
FP671120.4	4.26738e-22	0.410122	0.194	0.015	1.5619e-17
IL1RAPL1	4.29793e-22	-1.35655	0.419	0.818	1.57308e-17
IKBKB	4.34663e-22	0.484152	0.282	0.039	1.59091e-17
CAPN2	4.5113e-22	0.781968	0.395	0.08	1.65118e-17
CHIC2	4.53016e-22	1.03336	0.371	0.076	1.65809e-17
TYMP	4.75148e-22	0.530889	0.202	0.017	1.73909e-17
FCHO2	5.29028e-22	1.01237	0.492	0.137	1.9363e-17
SOS1	5.35114e-22	1.025	0.75	0.302	1.95857e-17
HSD17B11	5.43595e-22	0.571585	0.202	0.017	1.98961e-17
ARPC4	5.71322e-22	0.368933	0.234	0.025	2.0911e-17
PTPRM	5.74858e-22	1.49717	0.887	0.905	2.10404e-17
ALG13	6.57373e-22	0.955448	0.435	0.105	2.40605e-17
IL1R1	6.85022e-22	0.880437	0.258	0.034	2.50725e-17
SOX18	6.85022e-22	0.867472	0.258	0.034	2.50725e-17
FAM111A	7.24839e-22	0.54184	0.202	0.017	2.65298e-17
SOX13	7.5418e-22	0.449142	0.21	0.02	2.76037e-17
GATA2-AS1	8.52168e-22	0.463172	0.169	0.01	3.11902e-17
RAMP3	8.89104e-22	0.756242	0.234	0.027	3.25421e-17
AC022034.3	9.05594e-22	-2.06571	0.234	0.649	3.31456e-17
NR2F2	1.03842e-21	0.819401	0.218	0.022	3.80072e-17
CDC42SE2	1.06622e-21	0.888849	0.371	0.074	3.90246e-17
PKN3	1.10829e-21	0.3523	0.145	0.006	4.05644e-17
TTC28	1.12362e-21	1.30048	0.823	0.458	4.11255e-17
NFASC	1.20884e-21	1.34627	0.323	0.059	4.42449e-17
ERO1A	1.21082e-21	1.22359	0.25	0.032	4.43173e-17
WSB1	1.26861e-21	1.01159	0.694	0.26	4.64326e-17
PROCR	1.28751e-21	0.451892	0.21	0.02	4.71242e-17
HPCAL1	1.37628e-21	0.786359	0.347	0.066	5.03731e-17
ITM2A	1.37828e-21	0.768133	0.282	0.042	5.04464e-17
CXCL12	1.41661e-21	1.20351	0.371	0.079	5.18495e-17
PPP1R14A	1.43012e-21	0.642575	0.234	0.027	5.23438e-17
NIBAN2	1.53872e-21	0.524257	0.194	0.016	5.63189e-17
SYCP2L	1.55378e-21	0.57553	0.194	0.016	5.687e-17
NR5A2	1.57747e-21	0.921477	0.202	0.019	5.77371e-17
DISC1FP1	1.78917e-21	1.53268	0.25	0.034	6.54854e-17
MTPN	1.83988e-21	0.718475	0.363	0.071	6.73414e-17
BTN3A2	1.8607e-21	0.574268	0.226	0.024	6.81036e-17
CAVIN1	1.91071e-21	0.882128	0.573	0.17	6.99337e-17
PIP4K2A	1.95057e-21	1.10094	0.452	0.112	7.13929e-17
AC104211.2	1.99474e-21	0.477319	0.161	0.009	7.30094e-17
BCL3	2.02086e-21	0.557006	0.177	0.013	7.39654e-17
ACE	2.08967e-21	0.549561	0.202	0.019	7.64839e-17
GNB4	2.09743e-21	0.729146	0.298	0.048	7.67681e-17
TDRP	2.18259e-21	0.396051	0.161	0.009	7.98848e-17
FAM219A	2.22624e-21	0.89948	0.46	0.116	8.14828e-17
PTGDR	2.45142e-21	0.354509	0.121	0.002	8.97243e-17
ANXA2	2.4544e-21	0.562793	0.355	0.065	8.98333e-17
MLKL	2.53495e-21	0.315008	0.129	0.003	9.27815e-17
FERMT2	2.76352e-21	0.954794	0.621	0.214	1.01147e-16
PIEZO1	2.82574e-21	0.446064	0.161	0.009	1.03425e-16
PDCD6IP	2.90368e-21	0.879796	0.46	0.118	1.06278e-16
TMEM44	3.05964e-21	0.361842	0.177	0.013	1.11986e-16
RNF220	3.6704e-21	1.16019	0.331	0.063	1.3434e-16
PITPNB	3.80436e-21	0.983143	0.476	0.127	1.39243e-16
RELA	3.84063e-21	0.390853	0.177	0.013	1.40571e-16
TNNT3	3.93211e-21	0.648652	0.218	0.023	1.43919e-16
HCP5	4.50017e-21	0.565656	0.234	0.028	1.64711e-16
NEK3	4.58424e-21	0.389849	0.185	0.015	1.67788e-16
GRAMD1B	4.85963e-21	-1.90057	0.226	0.63	1.77867e-16
CLIC2	5.38465e-21	0.674585	0.226	0.025	1.97083e-16
TBK1	5.82264e-21	0.568598	0.306	0.051	2.13114e-16
LY6E	6.29224e-21	0.545153	0.226	0.025	2.30302e-16
PREX1	6.40213e-21	0.651501	0.234	0.028	2.34324e-16
ACER3	6.41356e-21	0.990382	0.444	0.111	2.34743e-16
TMEM184B	6.52788e-21	0.822235	0.435	0.107	2.38927e-16
C2CD2	6.53518e-21	0.452105	0.218	0.023	2.39194e-16
SOX17	6.53731e-21	0.390852	0.185	0.015	2.39272e-16
PLEKHG2	6.60195e-21	0.533166	0.185	0.015	2.41638e-16
PRICKLE2	6.99415e-21	1.07937	0.468	0.124	2.55993e-16
BRWD3	7.37713e-21	0.816582	0.347	0.068	2.7001e-16
MT-CO3	8.06439e-21	-0.968393	0.96	1	2.95165e-16
ELF2	8.24331e-21	1.18539	0.694	0.29	3.01713e-16
CAPNS1	8.31788e-21	0.515333	0.331	0.059	3.04443e-16
CHSY1	1.04135e-20	1.06632	0.395	0.094	3.81143e-16
ARHGAP31	1.0919e-20	1.41026	0.685	0.315	3.99645e-16
PEAK1	1.15618e-20	1.40657	0.806	0.484	4.23173e-16
DST	1.21146e-20	-0.93086	0.806	0.941	4.43406e-16
H3F3A	1.27067e-20	0.785318	0.387	0.085	4.65078e-16
ERICH1	1.30211e-20	0.532406	0.258	0.036	4.76585e-16
DYNC1I2	1.42957e-20	0.781515	0.427	0.103	5.23236e-16
SEL1L3	1.45153e-20	0.593623	0.177	0.014	5.31273e-16
RNF213	1.6781e-20	0.855546	0.46	0.121	6.142e-16
EXOC6	1.72058e-20	1.2002	0.581	0.198	6.2975e-16
NRP1	1.74709e-20	1.3757	0.871	0.683	6.39454e-16
TNIK	1.83873e-20	-1.6761	0.274	0.664	6.72995e-16
WAC	1.91987e-20	1.05505	0.726	0.311	7.0269e-16
MXD4	2.21976e-20	0.59212	0.226	0.027	8.12456e-16
SERINC3	2.64154e-20	0.586088	0.331	0.063	9.66831e-16
PHF14	2.75099e-20	1.048	0.565	0.183	1.00689e-15
SCYL2	2.76132e-20	0.853669	0.379	0.086	1.01067e-15
UBE2Q2	2.78368e-20	0.681596	0.298	0.051	1.01885e-15
IL10RB	2.99502e-20	0.425788	0.242	0.031	1.09621e-15
FRMD3	3.05678e-20	1.94754	0.516	0.175	1.11881e-15
UVRAG	3.14262e-20	1.15596	0.645	0.247	1.15023e-15
STARD9	3.15483e-20	0.784447	0.444	0.112	1.1547e-15
CYTH1	3.1828e-20	1.08905	0.573	0.191	1.16494e-15
PCDH1	3.22839e-20	0.256844	0.137	0.006	1.18162e-15
KCNQ1OT1	3.30274e-20	1.36603	0.403	0.098	1.20883e-15
ATOH8	3.42299e-20	0.649406	0.194	0.019	1.25285e-15
LINC02328	3.5603e-20	0.825147	0.169	0.013	1.30311e-15
CEP152	4.14787e-20	0.634705	0.153	0.009	1.51816e-15
KIAA1211L	4.19407e-20	0.654496	0.153	0.009	1.53507e-15
DANT2	4.23583e-20	-1.70532	0.242	0.637	1.55036e-15
ACTR2	4.30027e-20	0.79504	0.419	0.102	1.57394e-15
RAPH1	4.32532e-20	0.922265	0.347	0.072	1.58311e-15
PKP2	4.55316e-20	-1.59729	0.21	0.632	1.6665e-15
FXYD6	4.60447e-20	0.833392	0.315	0.058	1.68528e-15
TNFSF10	4.76912e-20	0.604998	0.25	0.035	1.74554e-15
MED13L	5.1751e-20	1.02453	0.879	0.492	1.89414e-15
MEIS2	5.21589e-20	-1.36125	0.379	0.725	1.90907e-15
TLE4	5.55492e-20	1.08303	0.403	0.102	2.03316e-15
AGPAT4	5.58296e-20	0.664669	0.202	0.021	2.04342e-15
ATP10D	5.82452e-20	0.660144	0.363	0.078	2.13183e-15
DPYD	5.99999e-20	1.34748	0.79	0.411	2.19606e-15
SP100	6.53839e-20	1.12435	0.524	0.17	2.39312e-15
FXYD5	7.12551e-20	0.400348	0.153	0.009	2.60801e-15
GIMAP4	7.18578e-20	0.407689	0.169	0.013	2.63007e-15
CLIC4	7.43616e-20	1.10613	0.742	0.336	2.72171e-15
USHBP1	7.79098e-20	0.354828	0.194	0.019	2.85158e-15
GIT1	7.85266e-20	0.510574	0.226	0.028	2.87415e-15
NRIR	8.00625e-20	0.31195	0.105	0.001	2.93037e-15
PPP2R3C	8.12123e-20	0.622855	0.306	0.054	2.97245e-15
ADIRF	8.5789e-20	0.688992	0.242	0.032	3.13996e-15
ACER2	9.02267e-20	0.73974	0.177	0.015	3.30239e-15
WWTR1	9.52982e-20	1.6834	0.629	0.258	3.48801e-15
REEP3	1.04139e-19	1.16366	0.5	0.155	3.81158e-15
HAND2-AS1	1.04353e-19	-1.78366	0.21	0.594	3.81942e-15
CASQ2	1.0595e-19	-1.49906	0.282	0.667	3.87789e-15
RASA1	1.07589e-19	0.927456	0.573	0.19	3.93786e-15
KANK3	1.10617e-19	0.49394	0.218	0.025	4.04871e-15
LRRC8B	1.20351e-19	0.901862	0.29	0.052	4.40496e-15
DDX60	1.24072e-19	0.599808	0.258	0.038	4.54114e-15
FRMD4A	1.26688e-19	1.28358	0.742	0.324	4.63692e-15
SLC25A43	1.5288e-19	0.577283	0.145	0.008	5.59556e-15
ADD1	1.63088e-19	0.885131	0.581	0.191	5.9692e-15
GBP2	1.6582e-19	0.477369	0.161	0.012	6.06919e-15
PRKN	1.67098e-19	-1.15993	0.621	0.854	6.11595e-15
NLK	1.69888e-19	1.22756	0.581	0.213	6.21809e-15
CDC27	1.75037e-19	1.01127	0.516	0.163	6.40653e-15
KIRREL1	1.7961e-19	0.686183	0.218	0.027	6.57392e-15
IQCK	1.80805e-19	0.678939	0.266	0.042	6.61763e-15
LRCH2	1.82277e-19	0.599238	0.194	0.02	6.6715e-15
BNIP2	2.03274e-19	0.555271	0.306	0.056	7.44002e-15
RPS6KA2	2.42336e-19	1.25383	0.613	0.239	8.86975e-15
KANK1	2.45447e-19	-1.39594	0.435	0.75	8.98361e-15
DNAJB14	2.49166e-19	0.63913	0.387	0.089	9.11973e-15
LIMA1	2.59747e-19	0.900808	0.379	0.089	9.50699e-15
PIP5K1C	2.843e-19	0.580744	0.339	0.068	1.04057e-14
EXT1	2.85178e-19	1.38819	0.79	0.435	1.04378e-14
FHL5	2.87767e-19	1.51432	0.177	0.016	1.05326e-14
ENPEP	2.88961e-19	1.79244	0.226	0.03	1.05762e-14
STARD8	2.92201e-19	0.557354	0.202	0.022	1.06948e-14
MYLK	2.96979e-19	0.578736	0.234	0.031	1.08697e-14
RNF125	3.07639e-19	0.43183	0.194	0.02	1.12599e-14
FZD4	3.10618e-19	0.463104	0.266	0.042	1.13689e-14
ATF6	3.24165e-19	0.879643	0.556	0.183	1.18647e-14
RCAN2	3.30406e-19	-0.956792	0.468	0.857	1.20932e-14
ADAM17	3.33357e-19	0.82705	0.46	0.129	1.22012e-14
FES	3.55238e-19	0.468833	0.169	0.014	1.30021e-14
KYAT3	3.64198e-19	0.498532	0.21	0.024	1.333e-14
FAT4	3.81712e-19	1.40493	0.452	0.136	1.3971e-14
PLCG1	3.91382e-19	0.516619	0.282	0.048	1.4325e-14
HOMER1	4.01538e-19	-1.83664	0.274	0.628	1.46967e-14
DAB2	4.07178e-19	0.508649	0.21	0.024	1.49031e-14
RSAD2	4.25457e-19	0.516916	0.153	0.01	1.55722e-14
DSCAML1	4.59759e-19	0.873907	0.29	0.052	1.68276e-14
ROBO4	4.73831e-19	0.467411	0.218	0.027	1.73427e-14
FAR1	4.90436e-19	0.734896	0.468	0.131	1.79505e-14
GDI1	5.13293e-19	0.450517	0.218	0.027	1.8787e-14
PACRG	5.49628e-19	-1.75825	0.242	0.622	2.01169e-14
DIAPH2	5.61918e-19	1.23478	0.75	0.381	2.05668e-14
SNTB1	5.7963e-19	0.85292	0.298	0.056	2.1215e-14
XRN1	6.51173e-19	0.981693	0.556	0.195	2.38336e-14
SYNE1	7.49887e-19	1.47555	0.863	0.555	2.74466e-14
CALM1	7.54009e-19	0.864317	0.532	0.17	2.75975e-14
GUCY1A2	7.60246e-19	1.95709	0.323	0.072	2.78258e-14
RGCC	7.87943e-19	0.591122	0.226	0.03	2.88395e-14
NLGN1	8.09021e-19	-1.28864	0.379	0.757	2.9611e-14
SNHG14	8.3336e-19	-1.25013	0.565	0.773	3.05018e-14
PML	8.40406e-19	0.496299	0.258	0.039	3.07597e-14
ASRGL1	8.44355e-19	0.296047	0.153	0.01	3.09042e-14
PPP4R3B	9.24421e-19	0.887833	0.387	0.096	3.38347e-14
MKLN1	9.30704e-19	1.00954	0.831	0.438	3.40647e-14
PLCL1	9.34868e-19	-0.805457	0.605	0.921	3.42171e-14
HSPB7	9.35996e-19	-1.48596	0.258	0.654	3.42584e-14
ACAP2	9.69682e-19	0.96115	0.565	0.192	3.54913e-14
DDX58	1.04829e-18	0.657752	0.258	0.041	3.83683e-14
WWC3	1.07271e-18	0.812135	0.484	0.136	3.92623e-14
WTAP	1.08279e-18	0.767519	0.371	0.088	3.96313e-14
AC025171.2	1.14374e-18	0.428339	0.161	0.013	4.1862e-14
FAM174B	1.15071e-18	0.827904	0.315	0.063	4.21173e-14
AP000787.1	1.26341e-18	0.578142	0.161	0.013	4.62422e-14
RYBP	1.27132e-18	0.766266	0.556	0.182	4.65317e-14
TUG1	1.27605e-18	0.512334	0.323	0.065	4.67047e-14
ZNF83	1.29747e-18	0.786271	0.347	0.075	4.74888e-14
FER	1.31317e-18	1.31915	0.685	0.32	4.80635e-14
TNFAIP1	1.3151e-18	0.437916	0.226	0.03	4.81338e-14
NBEAL1	1.38352e-18	1.2707	0.718	0.315	5.06382e-14
BTN3A1	1.49236e-18	0.425402	0.145	0.009	5.46218e-14
N4BP2L1	1.5016e-18	0.57643	0.226	0.031	5.49599e-14
BACE2	1.5648e-18	0.884313	0.371	0.089	5.72734e-14
RPS10	1.58295e-18	0.423659	0.21	0.025	5.79377e-14
DRAM1	1.60316e-18	0.473389	0.194	0.021	5.86774e-14
FBXO40	1.64564e-18	-1.6064	0.194	0.591	6.02322e-14
SBF2	1.64723e-18	1.11241	0.823	0.486	6.02903e-14
MRVI1	1.69981e-18	0.611304	0.169	0.015	6.22146e-14
SPRY4	1.71731e-18	0.302453	0.145	0.009	6.28551e-14
G2E3	1.86935e-18	0.487778	0.266	0.044	6.84202e-14
KL	1.96071e-18	0.531638	0.113	0.003	7.17639e-14
MSX1	1.99707e-18	0.279434	0.145	0.009	7.30947e-14
PEBP4	2.11154e-18	-1.78489	0.218	0.582	7.72844e-14
WNK2	2.21357e-18	-1.648	0.202	0.584	8.10189e-14
TCTEX1D1	2.32918e-18	0.444162	0.113	0.003	8.52504e-14
LEPROTL1	2.35158e-18	0.442812	0.25	0.038	8.60701e-14
ESYT2	2.43588e-18	1.54682	0.766	0.381	8.91557e-14
TSPAN13	2.45988e-18	0.736224	0.177	0.017	9.00342e-14
TCF12	2.47825e-18	1.03835	0.815	0.513	9.07063e-14
SERTAD3	2.5551e-18	0.301631	0.113	0.003	9.35192e-14
AC025048.2	2.77379e-18	0.408141	0.105	0.002	1.01524e-13
HOXB3	2.97544e-18	0.286629	0.105	0.002	1.08904e-13
IL4R	2.99119e-18	0.550662	0.137	0.008	1.09481e-13
SYPL1	3.13727e-18	0.502896	0.234	0.034	1.14827e-13
LIMK2	3.32648e-18	0.768489	0.323	0.07	1.21753e-13
LINC01151	3.35438e-18	-1.9155	0.21	0.583	1.22774e-13
HNRNPA3	3.46143e-18	0.895435	0.5	0.158	1.26692e-13
IL32	3.49773e-18	0.653742	0.25	0.039	1.2802e-13
CRIP1	3.5975e-18	0.601218	0.21	0.027	1.31672e-13
TRIM25	3.63882e-18	0.422625	0.226	0.031	1.33184e-13
ITGB1	3.85373e-18	1.02322	0.774	0.368	1.4105e-13
RAB5A	4.03969e-18	0.728577	0.387	0.095	1.47857e-13
ECSCR	4.29849e-18	0.559361	0.194	0.022	1.57329e-13
SENP7	4.5129e-18	0.783843	0.468	0.138	1.65177e-13
CTNND1	4.74567e-18	1.01081	0.702	0.319	1.73696e-13
IFITM2	4.76542e-18	0.756689	0.323	0.068	1.74419e-13
CD300LG	4.88094e-18	0.395407	0.177	0.017	1.78647e-13
CLEC14A	4.97543e-18	0.575732	0.258	0.043	1.82106e-13
BMPR2	5.01627e-18	1.14657	0.815	0.488	1.836e-13
ETNK1	5.04838e-18	0.706919	0.419	0.109	1.84776e-13
MB	5.06154e-18	-1.68435	0.226	0.582	1.85257e-13
TMSB4X	5.10476e-18	1.22831	0.484	0.156	1.86839e-13
ARID4B	5.43171e-18	0.886223	0.677	0.286	1.98806e-13
AL353138.1	5.43268e-18	0.723706	0.161	0.014	1.98841e-13
ATXN3	6.20254e-18	0.840616	0.411	0.109	2.27019e-13
ROCK1	6.2826e-18	1.09868	0.653	0.29	2.29949e-13
SHOC2	6.56329e-18	0.964157	0.524	0.178	2.40223e-13
KCND3	6.71377e-18	-1.57683	0.194	0.583	2.45731e-13
MYOM3	6.7281e-18	-1.35418	0.282	0.713	2.46255e-13
PALM	7.07262e-18	0.447831	0.202	0.024	2.58865e-13
ABHD17A	7.19619e-18	0.570909	0.234	0.035	2.63388e-13
PIK3CA	7.24064e-18	0.891163	0.395	0.107	2.65015e-13
BCAP31	7.33183e-18	0.357627	0.218	0.029	2.68352e-13
MT-ND4L	7.40526e-18	-1.2505	0.573	0.84	2.7104e-13
XRCC5	7.41397e-18	0.812462	0.508	0.162	2.71359e-13
VPS13C	7.76687e-18	1.01642	0.661	0.276	2.84275e-13
GOLPH3	7.84212e-18	0.868015	0.508	0.162	2.8703e-13
ZDHHC20	7.85615e-18	1.0321	0.444	0.132	2.87543e-13
RASA2	8.01984e-18	1.09958	0.508	0.167	2.93534e-13
RAC1	8.06495e-18	0.540593	0.355	0.08	2.95185e-13
TMEM30A	8.12133e-18	0.723477	0.331	0.071	2.97249e-13
TAOK2	8.34082e-18	0.321159	0.218	0.029	3.05282e-13
STOX2	8.36593e-18	1.38961	0.613	0.262	3.06201e-13
ZFP36	8.80251e-18	1.37399	0.548	0.209	3.22181e-13
USP12	8.9737e-18	0.652796	0.452	0.126	3.28446e-13
UBA2	9.02491e-18	0.845871	0.411	0.108	3.30321e-13
RHOB	9.19495e-18	0.874732	0.395	0.101	3.36544e-13
MAPK14	9.44067e-18	0.632358	0.403	0.103	3.45538e-13
FAM162B	9.56453e-18	0.669582	0.145	0.01	3.50071e-13
RPL28	9.65322e-18	0.870071	0.452	0.129	3.53317e-13
RAB27A	9.75799e-18	0.544275	0.25	0.041	3.57152e-13
APOL6	1.00275e-17	0.339923	0.161	0.014	3.67018e-13
DEK	1.06573e-17	0.730356	0.363	0.087	3.90068e-13
PCGF2	1.09259e-17	0.307064	0.161	0.014	3.99898e-13
ECT2	1.11715e-17	0.425015	0.145	0.01	4.08888e-13
MIS18BP1	1.13954e-17	0.546155	0.282	0.052	4.17083e-13
RNF152	1.19101e-17	1.36461	0.379	0.103	4.3592e-13
AC002070.1	1.21588e-17	0.736517	0.194	0.023	4.45024e-13
MCMBP	1.2302e-17	0.434224	0.218	0.03	4.50265e-13
ANK3	1.26734e-17	-1.19804	0.315	0.674	4.6386e-13
YBX3	1.28008e-17	1.17598	0.565	0.211	4.68523e-13
PTEN	1.28176e-17	1.21419	0.556	0.213	4.69135e-13
NR3C1	1.37655e-17	1.20626	0.677	0.307	5.0383e-13
GBP1	1.38946e-17	0.389114	0.169	0.016	5.08557e-13
SEC24B	1.39905e-17	0.898057	0.516	0.174	5.12066e-13
SPCS3	1.41692e-17	0.509669	0.315	0.065	5.18608e-13
RPL8	1.41794e-17	0.693843	0.387	0.097	5.18979e-13
ADIPOR2	1.45545e-17	1.08827	0.468	0.156	5.32709e-13
ARHGEF26	1.46758e-17	0.57361	0.177	0.019	5.37149e-13
CHN1	1.51652e-17	0.771445	0.363	0.088	5.5506e-13
RAB11A	1.54317e-17	0.554613	0.315	0.065	5.64817e-13
FAR2	1.69075e-17	0.507853	0.185	0.021	6.1883e-13
SEPTIN9	1.91906e-17	0.731107	0.403	0.104	7.02396e-13
ATP1B3	1.92486e-17	1.72141	0.444	0.132	7.04518e-13
RNF144A	2.04313e-17	0.859135	0.411	0.114	7.47807e-13
ZDHHC13	2.06176e-17	0.396597	0.177	0.019	7.54626e-13
TAPBP	2.08426e-17	0.593823	0.355	0.082	7.62858e-13
LAP3	2.18557e-17	0.564768	0.234	0.036	7.99941e-13
FNBP1L	2.20641e-17	1.17717	0.508	0.178	8.07568e-13
ASXL1	2.24123e-17	0.886633	0.476	0.145	8.20311e-13
PIK3C2B	2.36275e-17	0.95012	0.323	0.074	8.64789e-13
CYTH3	2.45998e-17	1.10685	0.524	0.181	9.00378e-13
RPS18	2.4606e-17	0.773488	0.387	0.098	9.00605e-13
MT-ND3	2.48811e-17	-0.83348	0.952	1	9.10674e-13
MAGI3	2.54241e-17	1.06797	0.508	0.178	9.30547e-13
PDS5B	2.56182e-17	0.881346	0.613	0.227	9.37652e-13
DDX3X	2.67261e-17	0.890261	0.5	0.162	9.78202e-13
EPHB4	2.68649e-17	0.328394	0.153	0.013	9.83281e-13
SNTG2	2.71185e-17	1.13658	0.194	0.024	9.92565e-13
PAWR	2.73004e-17	0.863205	0.282	0.056	9.99221e-13
SRL	3.14037e-17	-1.60817	0.218	0.581	1.14941e-12
GIMAP7	3.37564e-17	0.337654	0.218	0.03	1.23552e-12
HNRNPD	3.58388e-17	0.711999	0.452	0.132	1.31174e-12
DHX9	3.59867e-17	0.49868	0.347	0.079	1.31715e-12
TECPR1	3.62414e-17	0.485247	0.218	0.031	1.32647e-12
MYCBP2	3.82945e-17	0.860775	0.669	0.277	1.40162e-12
VIP	4.16872e-17	0.321754	0.113	0.005	1.52579e-12
CA4	4.27977e-17	0.731497	0.177	0.02	1.56644e-12
CYB5B	4.3546e-17	0.614734	0.274	0.052	1.59383e-12
ELF4	4.38045e-17	0.344789	0.113	0.005	1.60329e-12
PLS3	4.74942e-17	1.30963	0.54	0.206	1.73834e-12
HLX	4.78433e-17	0.347559	0.161	0.015	1.75111e-12
MYO1D	5.09792e-17	1.17278	0.46	0.149	1.86589e-12
MAN2A1	5.38312e-17	0.84216	0.379	0.1	1.97027e-12
ODF2L	5.50866e-17	0.741725	0.298	0.064	2.01622e-12
TBC1D4	6.03993e-17	-1.4168	0.274	0.627	2.21067e-12
SRP54	6.09309e-17	0.619674	0.29	0.058	2.23013e-12
LBR	6.24635e-17	0.535846	0.194	0.024	2.28623e-12
TRIM22	6.28384e-17	0.475199	0.185	0.022	2.29995e-12
HDAC7	6.63933e-17	0.583998	0.355	0.086	2.43006e-12
RPS14	6.73409e-17	0.807295	0.371	0.095	2.46474e-12
RCN2	7.13089e-17	0.483089	0.185	0.022	2.60998e-12
FLOT1	7.32971e-17	0.562278	0.298	0.06	2.68275e-12
RNF150	7.36949e-17	-1.59502	0.266	0.616	2.69731e-12
MAP3K11	7.47715e-17	0.44533	0.242	0.039	2.73671e-12
SLC14A1	7.6734e-17	0.499203	0.185	0.022	2.80854e-12
GPSM3	7.68017e-17	0.209841	0.105	0.003	2.81102e-12
SLCO2A1	7.98597e-17	0.248312	0.105	0.003	2.92295e-12
RPL11	8.68736e-17	0.689374	0.492	0.148	3.17966e-12
STAT5B	8.80436e-17	0.797273	0.363	0.092	3.22248e-12
H1FX	9.04681e-17	0.439623	0.194	0.024	3.31122e-12
DUT	9.05991e-17	0.555222	0.25	0.043	3.31602e-12
PPP1R2	9.33503e-17	0.69944	0.274	0.053	3.41671e-12
ATP2A2	9.33672e-17	-1.29718	0.532	0.729	3.41733e-12
CCDC50	9.38305e-17	0.829738	0.444	0.133	3.43429e-12
CDRT1	9.40446e-17	0.359163	0.097	0.002	3.44212e-12
ACTA1	9.84138e-17	-1.51319	0.226	0.596	3.60204e-12
CMPK2	1.01187e-16	0.229929	0.089	0.001	3.70353e-12
MAML3	1.04962e-16	1.46858	0.548	0.216	3.8417e-12
RIN3	1.06353e-16	1.03236	0.363	0.094	3.89264e-12
MED23	1.07836e-16	0.575357	0.266	0.05	3.94689e-12
BTN3A3	1.0836e-16	0.407344	0.145	0.012	3.9661e-12
AC007743.1	1.09521e-16	0.220127	0.097	0.002	4.00857e-12
GNA13	1.10781e-16	0.757555	0.339	0.08	4.0547e-12
SNCG	1.10823e-16	0.296085	0.129	0.008	4.05622e-12
CALHM2	1.11046e-16	0.21494	0.097	0.002	4.06441e-12
ABLIM1	1.2157e-16	-0.735535	0.855	0.972	4.4496e-12
OSTF1	1.23948e-16	0.622639	0.226	0.036	4.53663e-12
SIPA1L1	1.32344e-16	0.9974	0.403	0.115	4.84394e-12
LPAR6	1.32792e-16	0.634596	0.266	0.05	4.86031e-12
RPL36	1.3436e-16	0.656014	0.508	0.162	4.91771e-12
SORBS3	1.40736e-16	0.56258	0.266	0.049	5.15107e-12
RBM26	1.61687e-16	0.799688	0.581	0.216	5.91792e-12
KIAA1109	1.63282e-16	0.864258	0.581	0.22	5.97628e-12
PELO	1.67834e-16	0.346845	0.153	0.014	6.14288e-12
PCNX1	1.69121e-16	1.00651	0.637	0.278	6.18999e-12
NOTCH3	1.77513e-16	1.27606	0.29	0.063	6.49714e-12
PPP1R21	1.79157e-16	0.625477	0.331	0.076	6.55734e-12
NRN1	1.87683e-16	0.304529	0.153	0.014	6.86939e-12
SIGIRR	1.87683e-16	0.37989	0.153	0.014	6.86939e-12
ADGRG1	1.9196e-16	0.491337	0.161	0.016	7.02592e-12
TBCD	1.94283e-16	1.02809	0.492	0.169	7.11097e-12
LINC01505	2.01018e-16	-1.6041	0.258	0.594	7.35747e-12
SPAG9	2.03959e-16	0.870423	0.726	0.333	7.4651e-12
RPL21	2.04126e-16	0.647441	0.484	0.147	7.4712e-12
NDNF	2.06453e-16	0.622805	0.137	0.01	7.55639e-12
TAP1	2.06453e-16	0.378617	0.137	0.01	7.55639e-12
VWC2	2.23339e-16	-1.74803	0.185	0.533	8.17442e-12
DEPTOR	2.26343e-16	0.732798	0.315	0.071	8.28437e-12
GPAT3	2.32184e-16	-1.67154	0.202	0.548	8.49816e-12
CAMK1D	2.50838e-16	0.929037	0.306	0.068	9.18094e-12
CPSF6	2.56871e-16	0.751763	0.484	0.159	9.40174e-12
YWHAB	2.77833e-16	0.67353	0.347	0.087	1.0169e-11
LGALS3	2.80995e-16	0.513969	0.379	0.095	1.02847e-11
TXNIP	2.83691e-16	1.0119	0.589	0.234	1.03834e-11
ANKRD36B	2.84661e-16	0.513178	0.21	0.031	1.04189e-11
SDC3	2.85228e-16	0.373533	0.137	0.01	1.04396e-11
TNFRSF10A	2.88117e-16	0.364541	0.137	0.01	1.05454e-11
SOX5	2.89753e-16	2.47285	0.435	0.159	1.06053e-11
HACE1	2.92271e-16	0.69187	0.282	0.058	1.06974e-11
SSBP4	2.9469e-16	0.379449	0.169	0.019	1.07859e-11
CFL1	2.96387e-16	0.61336	0.315	0.07	1.08481e-11
SLC35F5	2.96721e-16	0.540378	0.403	0.111	1.08603e-11
PPARG	2.98489e-16	1.23706	0.492	0.177	1.0925e-11
CCDC141	3.06076e-16	-1.48169	0.266	0.598	1.12027e-11
NIPBL	3.0896e-16	0.896166	0.782	0.423	1.13082e-11
TMEM88	3.15446e-16	0.325695	0.137	0.01	1.15456e-11
ZNFX1	3.16849e-16	0.469305	0.242	0.042	1.1597e-11
MEOX1	3.17825e-16	0.525676	0.194	0.025	1.16327e-11
TRIM38	3.22719e-16	0.338145	0.194	0.025	1.18118e-11
PTH1R	3.31855e-16	0.462562	0.169	0.019	1.21462e-11
MCL1	3.35426e-16	0.827114	0.565	0.209	1.22769e-11
CEP112	3.41787e-16	1.00203	0.629	0.265	1.25097e-11
RAD51B	3.4196e-16	1.63342	0.54	0.225	1.25161e-11
CYB5R4	3.48716e-16	0.442145	0.266	0.05	1.27634e-11
CDC42SE1	3.674e-16	0.448619	0.218	0.034	1.34472e-11
ZFAND6	3.67963e-16	0.910719	0.516	0.185	1.34678e-11
GLUD1	3.70449e-16	0.538528	0.298	0.064	1.35588e-11
YTHDC1	3.7173e-16	0.663106	0.532	0.178	1.36057e-11
PHLPP1	3.83108e-16	0.806643	0.46	0.145	1.40221e-11
PSME1	3.96741e-16	0.306868	0.185	0.023	1.45211e-11
SMAD2	4.13645e-16	0.826341	0.556	0.21	1.51398e-11
FBXO11	4.61778e-16	1.11284	0.718	0.349	1.69016e-11
FKBP9	4.8354e-16	0.53072	0.331	0.078	1.7698e-11
SNX9	4.85538e-16	0.885134	0.516	0.181	1.77712e-11
ANO1	4.85742e-16	0.556919	0.202	0.029	1.77786e-11
AGFG1	4.86816e-16	0.65855	0.435	0.132	1.7818e-11
SPOCK2	5.05705e-16	0.374066	0.113	0.006	1.85093e-11
LOXHD1	5.08308e-16	0.480843	0.129	0.009	1.86046e-11
NRP2	5.28163e-16	0.977253	0.185	0.024	1.93313e-11
VPS4B	5.5439e-16	0.550085	0.242	0.043	2.02912e-11
GPD2	5.54783e-16	0.887689	0.363	0.095	2.03056e-11
PFN1	5.90485e-16	0.358391	0.242	0.042	2.16123e-11
LINC02248	5.93816e-16	-1.79631	0.161	0.509	2.17343e-11
CKMT2	5.96258e-16	-1.69109	0.121	0.475	2.18236e-11
IER2	6.56651e-16	0.759976	0.427	0.124	2.40341e-11
PPM1D	6.59888e-16	0.660243	0.363	0.095	2.41526e-11
KCNC4	6.76257e-16	0.201356	0.113	0.006	2.47517e-11
HLA-DMA	7.0096e-16	0.397622	0.129	0.009	2.56558e-11
ABI1	7.31263e-16	0.594039	0.403	0.112	2.67649e-11
FZD6	7.32516e-16	0.491189	0.218	0.035	2.68108e-11
RPS17	7.3579e-16	0.66479	0.419	0.119	2.69306e-11
TRPC6	7.77519e-16	0.769706	0.169	0.02	2.8458e-11
LRRC2	8.00889e-16	-1.7475	0.145	0.498	2.93133e-11
PPP2R3A	8.03792e-16	-1.4188	0.266	0.61	2.94196e-11
TNNT1	8.11311e-16	-1.40203	0.185	0.552	2.96948e-11
UBE2D3	8.22615e-16	1.17849	0.718	0.368	3.01085e-11
UFM1	8.48269e-16	0.528385	0.25	0.046	3.10475e-11
SIDT1	8.52922e-16	0.605738	0.129	0.009	3.12178e-11
MRTFB	8.5503e-16	1.08397	0.645	0.305	3.12949e-11
MAP4K5	8.64475e-16	0.904495	0.355	0.096	3.16406e-11
IQGAP1	8.78386e-16	0.792419	0.565	0.213	3.21498e-11
DTNA	9.07336e-16	-0.987265	0.5	0.793	3.32094e-11
NOS3	9.35813e-16	0.272824	0.129	0.009	3.42517e-11
SPTBN1	9.6125e-16	0.910856	0.927	0.742	3.51827e-11
NOSTRIN	9.69655e-16	0.94511	0.21	0.034	3.54904e-11
CLEC3B	9.75154e-16	0.293352	0.129	0.009	3.56916e-11
LIFR	1.02539e-15	0.984025	0.508	0.19	3.75302e-11
NCOA7	1.06502e-15	0.776536	0.282	0.06	3.89806e-11
ZNF385D	1.06581e-15	1.38119	0.589	0.254	3.90097e-11
SPTLC2	1.10902e-15	0.692103	0.315	0.074	4.05914e-11
MAP3K6	1.11094e-15	0.360383	0.161	0.017	4.06615e-11
TGFB1	1.12394e-15	0.377471	0.185	0.024	4.11374e-11
ADPRHL1	1.14158e-15	-1.41342	0.202	0.562	4.1783e-11
BMP5	1.147e-15	1.22951	0.202	0.031	4.19812e-11
TLN1	1.16341e-15	0.581198	0.403	0.111	4.25819e-11
MEF2C-AS1	1.19794e-15	1.16208	0.371	0.105	4.38459e-11
ATP11C	1.1983e-15	0.661318	0.29	0.064	4.38591e-11
MT2A	1.19979e-15	0.394059	0.161	0.017	4.39136e-11
NR2F2-AS1	1.20162e-15	2.09956	0.331	0.093	4.39803e-11
AL390728.6	1.22047e-15	0.315714	0.161	0.017	4.46704e-11
CDKN1B	1.24149e-15	0.286803	0.161	0.017	4.544e-11
ILK	1.25539e-15	0.520392	0.29	0.063	4.59484e-11
EIF3D	1.2759e-15	0.295599	0.194	0.027	4.66992e-11
CAMK2G	1.27973e-15	0.54853	0.242	0.044	4.68395e-11
MT-ATP8	1.36256e-15	-1.10353	0.637	0.861	4.98712e-11
VPS50	1.40739e-15	0.763949	0.355	0.094	5.15119e-11
LRP6	1.44123e-15	0.743701	0.387	0.109	5.27505e-11
SP3	1.52e-15	0.771477	0.347	0.09	5.56337e-11
KCNMB2	1.52865e-15	-1.78161	0.185	0.539	5.59501e-11
BEND7	1.54978e-15	0.621405	0.315	0.073	5.67233e-11
GNB2	1.55237e-15	0.255787	0.194	0.027	5.68183e-11
DHX36	1.57582e-15	0.590312	0.411	0.118	5.76766e-11
CACNA2D1	1.58851e-15	-1.14253	0.492	0.754	5.81412e-11
FABP5	1.59504e-15	0.926805	0.379	0.108	5.83802e-11
USP3	1.60802e-15	0.749796	0.387	0.109	5.8855e-11
SEMA3G	1.61233e-15	0.412071	0.137	0.012	5.90129e-11
AHR	1.64859e-15	0.655757	0.323	0.078	6.03399e-11
SRP14	1.6922e-15	0.367298	0.25	0.046	6.19363e-11
TMPO	1.76456e-15	0.441271	0.21	0.032	6.45845e-11
FILIP1	1.7665e-15	-1.05232	0.508	0.747	6.46557e-11
STC1	1.78579e-15	1.37856	0.153	0.016	6.53617e-11
SCN5A	1.78834e-15	-1.48285	0.177	0.53	6.54549e-11
PKD1L1	1.81864e-15	2.0695	0.427	0.161	6.65642e-11
NDUFAF7	1.81873e-15	0.292399	0.137	0.012	6.65672e-11
APPBP2	1.82865e-15	0.655746	0.46	0.144	6.69304e-11
UBA6	1.85745e-15	0.564256	0.331	0.081	6.79844e-11
DYM	1.86061e-15	0.925794	0.669	0.297	6.81001e-11
ADARB1	1.88489e-15	1.02899	0.492	0.178	6.8989e-11
RPL23	1.88615e-15	0.551298	0.387	0.105	6.90348e-11
PPP1CB	1.922e-15	1.54689	0.573	0.25	7.0347e-11
AC074033.1	1.93359e-15	0.231545	0.073	0	7.07715e-11
LCN6	1.93361e-15	0.301996	0.073	0	7.0772e-11
CELF2	2.0012e-15	-0.920619	0.637	0.854	7.32461e-11
AL445426.1	2.01192e-15	0.656569	0.145	0.014	7.36383e-11
ARPC1B	2.17238e-15	0.526241	0.218	0.036	7.95112e-11
SRSF9	2.22933e-15	0.224348	0.121	0.008	8.15959e-11
DCP2	2.23864e-15	0.544597	0.274	0.057	8.19364e-11
SKI	2.32482e-15	0.646835	0.484	0.154	8.50906e-11
GCC2	2.32572e-15	0.67843	0.395	0.112	8.51236e-11
RALYL	2.42127e-15	-1.71549	0.161	0.509	8.86209e-11
AC012409.2	2.48499e-15	0.74087	0.169	0.021	9.09531e-11
TMCC3	2.50412e-15	0.382381	0.145	0.014	9.16534e-11
CD79B	2.53499e-15	0.263233	0.097	0.003	9.2783e-11
RAPGEF4	2.54971e-15	1.0395	0.403	0.126	9.33218e-11
SOCS2	2.55854e-15	0.213537	0.121	0.008	9.36451e-11
HEY1	2.66914e-15	0.290902	0.121	0.008	9.76934e-11
NBDY	2.80468e-15	0.732606	0.427	0.131	1.02654e-10
ARHGDIA	2.87269e-15	0.562198	0.21	0.034	1.05143e-10
GPRC5B	2.96596e-15	0.661951	0.339	0.086	1.08557e-10
TNFRSF1A	3.01565e-15	0.436454	0.274	0.057	1.10376e-10
ROR1	3.26688e-15	-1.34506	0.266	0.622	1.19571e-10
SFT2D2	3.31844e-15	0.228102	0.218	0.035	1.21458e-10
SGCG	3.3551e-15	-1.49338	0.234	0.556	1.228e-10
AC098829.1	3.38701e-15	1.02908	0.21	0.035	1.23968e-10
Z97192.3	3.40563e-15	0.222998	0.089	0.002	1.24649e-10
AC092868.2	3.49983e-15	0.256861	0.089	0.002	1.28097e-10
WT1	3.51807e-15	0.514159	0.153	0.016	1.28765e-10
B4GALNT3	3.53502e-15	-1.65196	0.113	0.467	1.29385e-10
CAND1	3.53508e-15	0.591974	0.298	0.07	1.29388e-10
MUSTN1	3.55639e-15	0.20287	0.081	0.001	1.30167e-10
NFE2L2	3.59924e-15	0.661336	0.637	0.254	1.31736e-10
HYAL2	3.76714e-15	0.325123	0.145	0.014	1.37881e-10
DDHD2	3.8194e-15	0.388129	0.242	0.044	1.39794e-10
ANO10	3.90364e-15	0.872923	0.363	0.103	1.42877e-10
UPB1	4.03955e-15	0.36477	0.153	0.016	1.47851e-10
B3GNT5	4.17873e-15	0.580152	0.129	0.01	1.52946e-10
NFKBIZ	4.26938e-15	0.613682	0.266	0.056	1.56264e-10
TC2N	4.30532e-15	1.08447	0.218	0.038	1.57579e-10
RPS2	4.33092e-15	0.763967	0.395	0.116	1.58516e-10
TERF1	4.40182e-15	0.467403	0.25	0.049	1.61111e-10
ABO	4.51041e-15	0.44585	0.226	0.039	1.65085e-10
DPP8	4.62389e-15	0.527526	0.387	0.108	1.69239e-10
TMEM173	4.67943e-15	0.36585	0.185	0.025	1.71272e-10
RAP2A	4.78327e-15	0.470106	0.202	0.031	1.75073e-10
JAM2	5.06674e-15	0.94462	0.46	0.155	1.85448e-10
CX3CL1	5.09513e-15	0.472432	0.169	0.021	1.86487e-10
SRSF7	5.29851e-15	0.52223	0.242	0.046	1.93931e-10
DHX15	5.32343e-15	0.706532	0.379	0.109	1.94843e-10
PSMB3	5.40071e-15	0.285378	0.161	0.019	1.97671e-10
CEP68	5.42094e-15	0.461385	0.242	0.045	1.98412e-10
PDE7A	5.50173e-15	-1.37535	0.29	0.612	2.01369e-10
ZNF207	5.58246e-15	0.619313	0.46	0.147	2.04323e-10
ANO5	5.88189e-15	-1.40124	0.218	0.561	2.15283e-10
SETBP1	5.96287e-15	1.02165	0.484	0.177	2.18247e-10
AC138305.1	5.98234e-15	-1.74908	0.258	0.578	2.1896e-10
GPR161	6.00277e-15	0.245308	0.113	0.007	2.19707e-10
DUSP22	6.2696e-15	0.371707	0.258	0.051	2.29474e-10
RETREG1	6.35383e-15	-1.58152	0.169	0.502	2.32556e-10
PPP1R15B	6.4171e-15	0.369545	0.21	0.034	2.34872e-10
MCU	6.48063e-15	1.03374	0.508	0.192	2.37197e-10
AC079380.1	6.74333e-15	0.721649	0.137	0.013	2.46812e-10
AC026353.1	6.76507e-15	0.270861	0.129	0.01	2.47608e-10
CERS6	6.77199e-15	-1.14627	0.331	0.665	2.47862e-10
PPM1H	6.84411e-15	0.876677	0.355	0.102	2.50501e-10
PRPF3	7.05669e-15	0.348159	0.258	0.051	2.58282e-10
SCN4B	7.22822e-15	0.210588	0.113	0.007	2.6456e-10
ZNF706	7.31144e-15	0.569295	0.331	0.085	2.67606e-10
WDR44	7.50591e-15	0.643821	0.355	0.097	2.74724e-10
PMS1	7.76909e-15	0.4793	0.25	0.05	2.84357e-10
IFNAR1	8.41886e-15	0.507721	0.266	0.056	3.08139e-10
DNTTIP2	8.4203e-15	0.419255	0.137	0.013	3.08191e-10
ALPK3	8.64307e-15	-1.51088	0.274	0.578	3.16345e-10
INPP1	9.08946e-15	0.468744	0.21	0.035	3.32683e-10
NCKAP1	9.22697e-15	0.793709	0.653	0.294	3.37716e-10
TTC39B	9.7971e-15	0.450713	0.177	0.024	3.58584e-10
METTL4	9.94135e-15	0.403444	0.137	0.013	3.63863e-10
RGS6	9.99317e-15	-0.574485	0.411	0.784	3.6576e-10
CASP7	1.01262e-14	0.278995	0.137	0.013	3.70629e-10
AL050309.1	1.02727e-14	0.76572	0.274	0.061	3.75991e-10
CDKN1A	1.03745e-14	0.465039	0.21	0.035	3.79716e-10
SMCHD1	1.04527e-14	0.903528	0.637	0.282	3.82581e-10
RPS8	1.04625e-14	0.647438	0.476	0.16	3.82938e-10
CCDC85B	1.06521e-14	0.472497	0.21	0.035	3.89879e-10
MYL12B	1.16671e-14	0.426362	0.323	0.078	4.27027e-10
FAM241A	1.30211e-14	0.860911	0.379	0.116	4.76587e-10
TMEM165	1.31544e-14	0.819236	0.46	0.155	4.81463e-10
RPL27	1.33063e-14	0.449234	0.282	0.063	4.87023e-10
BAZ1A	1.33403e-14	0.580735	0.306	0.074	4.88267e-10
S100A16	1.50091e-14	0.379987	0.153	0.017	5.49347e-10
SCARB2	1.53006e-14	0.463707	0.323	0.08	5.60017e-10
ZFPM2	1.53293e-14	-0.730911	0.573	0.822	5.61069e-10
STAT6	1.55945e-14	0.246127	0.161	0.02	5.70776e-10
RASGRP2	1.58458e-14	0.355351	0.161	0.02	5.79973e-10
LEMD3	1.64543e-14	0.786253	0.387	0.118	6.02245e-10
AOC3	1.667e-14	0.270685	0.105	0.006	6.10137e-10
MT-CO1	1.6965e-14	-0.850456	0.79	0.973	6.20937e-10
CBFA2T3	1.729e-14	0.344886	0.153	0.017	6.3283e-10
SLC26A10	1.78282e-14	0.400646	0.121	0.009	6.52531e-10
LHFPL2	1.78679e-14	0.447862	0.218	0.038	6.53985e-10
PSMB9	1.8521e-14	0.225234	0.145	0.015	6.77888e-10
AL392023.2	1.85589e-14	0.316331	0.121	0.009	6.79274e-10
PHACTR1	1.87633e-14	-1.18992	0.532	0.753	6.86757e-10
PON2	1.87959e-14	0.444592	0.258	0.053	6.87949e-10
MTA2	1.89352e-14	0.3029	0.121	0.009	6.93047e-10
ARHGEF10	1.9522e-14	0.772183	0.508	0.188	7.14524e-10
JPH2	1.99233e-14	-1.47087	0.21	0.526	7.29212e-10
TMEM87B	2.03042e-14	0.469185	0.194	0.03	7.43154e-10
IRF1	2.05169e-14	0.258995	0.121	0.009	7.5094e-10
DYNLT3	2.26778e-14	0.200059	0.121	0.009	8.30032e-10
MRTFA	2.37354e-14	0.880527	0.685	0.331	8.68738e-10
CHD1	2.40202e-14	0.872747	0.524	0.197	8.79162e-10
ICE1	2.44545e-14	0.535706	0.363	0.102	8.95058e-10
NCKAP5	2.46123e-14	-1.09142	0.282	0.622	9.00836e-10
PUM2	2.4619e-14	0.826071	0.589	0.242	9.0108e-10
SLC35A3	2.48689e-14	0.495951	0.226	0.042	9.10228e-10
MYPN	2.59543e-14	-1.55279	0.153	0.488	9.49953e-10
TCF7L2	2.60643e-14	0.977446	0.645	0.295	9.5398e-10
PKP4	2.62573e-14	1.14019	0.694	0.367	9.61045e-10
STK10	2.62624e-14	0.644014	0.266	0.058	9.6123e-10
RIPK1	2.66549e-14	0.547662	0.282	0.065	9.75594e-10
NPIPB5	2.66656e-14	0.48669	0.387	0.112	9.75988e-10
SOX6	2.68441e-14	-1.16265	0.452	0.707	9.82522e-10
STAG1	2.94983e-14	0.855478	0.798	0.476	1.07967e-09
2024-03-05	2.96991e-14	0.691881	0.331	0.089	1.08702e-09
PCDH9	2.98562e-14	-0.900921	0.395	0.74	1.09277e-09
ARHGEF28	3.04213e-14	0.489956	0.129	0.012	1.11345e-09
CARD10	3.11429e-14	0.356086	0.129	0.012	1.13986e-09
IQSEC1	3.16548e-14	0.797938	0.492	0.174	1.1586e-09
HSP90AA1	3.19567e-14	-1.17369	0.637	0.804	1.16965e-09
TUT7	3.43506e-14	0.549415	0.339	0.09	1.25727e-09
MYO6	3.43647e-14	0.836862	0.435	0.146	1.25778e-09
ARIH1	3.44884e-14	0.914449	0.75	0.397	1.26231e-09
KMT2A	3.54401e-14	0.775277	0.548	0.214	1.29714e-09
PTPRG	3.70898e-14	0.986961	0.887	0.882	1.35752e-09
PPT2	3.71467e-14	0.225726	0.097	0.005	1.35961e-09
MDM2	3.73454e-14	0.509314	0.242	0.049	1.36688e-09
MYLK3	3.76522e-14	-1.52382	0.218	0.523	1.37811e-09
SNX14	3.88631e-14	0.800967	0.468	0.166	1.42243e-09
CAV1	3.96418e-14	1.16235	0.621	0.286	1.45093e-09
CORIN	4.02053e-14	-1.79049	0.105	0.443	1.47156e-09
UBE2L6	4.0359e-14	0.14456	0.097	0.005	1.47718e-09
PTGDS	4.10892e-14	-1.53632	0.169	0.496	1.50391e-09
BCLAF1	4.20374e-14	0.625288	0.468	0.155	1.53861e-09
CAMSAP2	4.49829e-14	0.778196	0.516	0.192	1.64642e-09
GTPBP1	4.53821e-14	0.314924	0.21	0.036	1.66103e-09
KCNN3	4.54367e-14	0.425658	0.202	0.034	1.66303e-09
SMAD5	4.5735e-14	0.729602	0.347	0.096	1.67395e-09
PTCHD4	4.62479e-14	1.05	0.177	0.027	1.69272e-09
ERAP2	4.75583e-14	0.423082	0.137	0.014	1.74068e-09
XRN2	4.79337e-14	0.627873	0.403	0.125	1.75442e-09
AC105450.1	4.84055e-14	0.32044	0.137	0.014	1.77169e-09
RO60	4.88689e-14	0.503865	0.298	0.073	1.78865e-09
SPIDR	5.35926e-14	0.859591	0.718	0.355	1.96154e-09
NPHP3	5.51478e-14	0.53302	0.355	0.1	2.01846e-09
IL13RA1	5.59022e-14	0.336179	0.169	0.023	2.04608e-09
PLPP1	5.64132e-14	1.84972	0.597	0.306	2.06478e-09
ATL3	5.75559e-14	0.331747	0.218	0.039	2.1066e-09
ANGEL1	5.95052e-14	0.493691	0.194	0.031	2.17795e-09
WDFY3	5.99969e-14	0.947884	0.629	0.299	2.19595e-09
TAF2	6.03296e-14	0.622618	0.355	0.1	2.20812e-09
MSRA	6.18101e-14	0.887592	0.532	0.209	2.26231e-09
VASP	6.53742e-14	0.441588	0.298	0.072	2.39276e-09
PHF11	6.68274e-14	0.387103	0.226	0.043	2.44595e-09
SPRY1	6.79405e-14	0.980553	0.258	0.057	2.48669e-09
STARD3NL	6.93446e-14	0.482	0.202	0.035	2.53808e-09
ADRA2C	7.03622e-14	0.17457	0.065	0	2.57533e-09
TMEM243	7.16938e-14	0.204334	0.089	0.003	2.62407e-09
SMURF2	7.33942e-14	0.650498	0.411	0.13	2.6863e-09
ISYNA1	7.47459e-14	0.262513	0.153	0.019	2.73578e-09
CDK19	7.85855e-14	0.880335	0.403	0.132	2.87631e-09
ACVRL1	7.94372e-14	0.194986	0.145	0.016	2.90748e-09
MPPED2	8.02128e-14	0.962739	0.492	0.191	2.93587e-09
ATP8B1	8.10186e-14	0.912334	0.476	0.17	2.96536e-09
PRKAG2	8.20236e-14	-1.36027	0.323	0.612	3.00215e-09
DCBLD1	8.35675e-14	0.823106	0.185	0.03	3.05865e-09
CARHSP1	8.40628e-14	0.509211	0.177	0.027	3.07678e-09
VPS36	8.62988e-14	0.541409	0.323	0.085	3.15862e-09
TTLL3	8.64267e-14	0.434307	0.218	0.041	3.1633e-09
CTNNB1	9.36652e-14	0.92805	0.621	0.297	3.42824e-09
SMURF1	9.62936e-14	0.844209	0.476	0.17	3.52444e-09
RELCH	9.68142e-14	0.784026	0.395	0.125	3.5435e-09
MYRIP	9.98772e-14	1.29552	0.218	0.044	3.65561e-09
ARPC5	1.00308e-13	0.465257	0.177	0.027	3.67136e-09
LINC00924	1.00352e-13	0.803726	0.129	0.013	3.67299e-09
MAP3K8	1.0137e-13	0.478041	0.202	0.035	3.71024e-09
PROS1	1.01863e-13	0.601248	0.282	0.067	3.72829e-09
SLC16A3	1.02411e-13	0.303212	0.121	0.01	3.74836e-09
EFCAB13	1.03449e-13	0.50053	0.169	0.024	3.78632e-09
SOAT1	1.04955e-13	0.468921	0.218	0.041	3.84148e-09
CNN3	1.05861e-13	0.700825	0.363	0.108	3.87464e-09
ACTC1	1.06332e-13	-1.42973	0.25	0.552	3.89185e-09
HHATL	1.07361e-13	-1.51926	0.145	0.468	3.92951e-09
RPL29	1.09321e-13	0.294068	0.298	0.071	4.00127e-09
TAL1	1.14423e-13	0.210758	0.081	0.002	4.18798e-09
KIAA1549	1.1708e-13	0.431018	0.169	0.024	4.28523e-09
INHBB	1.18639e-13	0.184298	0.073	0.001	4.3423e-09
PANK3	1.20781e-13	0.40239	0.226	0.044	4.42071e-09
RAI14	1.22208e-13	0.592631	0.226	0.044	4.47292e-09
ARHGEF3	1.26455e-13	1.09289	0.532	0.221	4.62839e-09
DISP1	1.27443e-13	0.838518	0.298	0.079	4.66453e-09
ZYX	1.36932e-13	0.308259	0.202	0.035	5.01183e-09
SLC35F6	1.40351e-13	0.314641	0.105	0.007	5.13697e-09
CAVIN2	1.40587e-13	0.903657	0.46	0.166	5.14561e-09
PDE8A	1.40598e-13	0.863285	0.605	0.272	5.14604e-09
TASOR	1.43437e-13	0.570672	0.379	0.116	5.24994e-09
HLA-DPA1	1.43533e-13	0.519286	0.194	0.032	5.25344e-09
HACL1	1.45275e-13	0.378704	0.226	0.044	5.31722e-09
FANCL	1.48005e-13	0.652722	0.242	0.052	5.41712e-09
SEMA3F	1.48026e-13	0.364157	0.105	0.007	5.41791e-09
GNG11	1.48421e-13	0.588833	0.331	0.089	5.43236e-09
DCN	1.52727e-13	-1.54067	0.169	0.491	5.58997e-09
CADPS	1.57366e-13	-1.59204	0.129	0.448	5.75976e-09
MBD6	1.58728e-13	0.343339	0.129	0.013	5.80961e-09
PARP12	1.62057e-13	0.425462	0.161	0.022	5.93143e-09
RYK	1.66342e-13	0.582256	0.371	0.112	6.0883e-09
PSMA6	1.73864e-13	0.573715	0.258	0.058	6.36359e-09
TAP2	1.76717e-13	0.251812	0.129	0.013	6.46802e-09
CSGALNACT2	1.79267e-13	0.513865	0.226	0.045	6.56137e-09
RESF1	1.79464e-13	0.532627	0.298	0.075	6.56855e-09
LINC01515	1.82134e-13	1.34231	0.347	0.11	6.66628e-09
ADRA1A	1.83293e-13	-1.45766	0.153	0.477	6.70869e-09
SYCP2	1.8641e-13	0.442445	0.153	0.02	6.8228e-09
LURAP1L	1.91707e-13	0.506866	0.145	0.017	7.01666e-09
STX4	1.94836e-13	0.368417	0.145	0.017	7.13121e-09
LMBR1	1.94883e-13	0.80528	0.484	0.182	7.13291e-09
MPZL1	1.95247e-13	0.501366	0.258	0.058	7.14625e-09
ADCY3	1.98016e-13	0.461623	0.145	0.017	7.24759e-09
CHD9	1.98805e-13	0.765354	0.798	0.425	7.27646e-09
IRAK4	2.03028e-13	0.400559	0.153	0.02	7.43102e-09
ARF6	2.03849e-13	0.244431	0.129	0.013	7.46106e-09
AP3M2	2.11468e-13	0.318664	0.137	0.015	7.73995e-09
APP	2.17183e-13	1.13043	0.669	0.353	7.94912e-09
STAT3	2.18507e-13	0.952405	0.661	0.319	7.99757e-09
ENSA	2.23833e-13	0.540011	0.323	0.087	8.19252e-09
ANXA4	2.28289e-13	0.554233	0.315	0.083	8.35559e-09
ISG15	2.32089e-13	0.287168	0.137	0.015	8.49468e-09
EFNA1	2.33834e-13	0.440499	0.202	0.036	8.55856e-09
GSTP1	2.35072e-13	0.276425	0.218	0.041	8.60388e-09
CAVIN3	2.38047e-13	0.279386	0.137	0.015	8.71277e-09
RADIL	2.42617e-13	0.313194	0.153	0.02	8.88001e-09
CPD	2.51335e-13	0.525149	0.315	0.083	9.19911e-09
RAB5C	2.52298e-13	0.310869	0.25	0.053	9.23434e-09
H19	2.54697e-13	1.27094	0.444	0.175	9.32217e-09
COP1	2.98882e-13	0.78476	0.661	0.317	1.09394e-08
ARL5B	3.01753e-13	0.585425	0.242	0.052	1.10445e-08
NAA50	3.03323e-13	0.483388	0.323	0.087	1.11019e-08
HNRNPH3	3.2361e-13	0.500533	0.331	0.09	1.18445e-08
TPR	3.31081e-13	0.687963	0.452	0.159	1.21179e-08
MON2	3.33625e-13	0.788624	0.613	0.279	1.2211e-08
RALGAPA1	3.34512e-13	0.897581	0.702	0.374	1.22435e-08
VOPP1	3.44604e-13	0.562185	0.331	0.093	1.26128e-08
ELK4	3.55593e-13	0.392983	0.226	0.045	1.30151e-08
KCNB1	3.67463e-13	0.377777	0.177	0.028	1.34495e-08
AGMO	3.71556e-13	0.74039	0.218	0.044	1.35993e-08
ALPK2	3.72081e-13	-1.47857	0.153	0.465	1.36185e-08
DNAJC1	3.74595e-13	0.734905	0.605	0.26	1.37105e-08
HOOK3	3.80026e-13	0.709317	0.492	0.185	1.39093e-08
KLHL20	3.88217e-13	0.509177	0.315	0.085	1.42091e-08
CYYR1-AS1	3.98816e-13	0.234394	0.113	0.009	1.45971e-08
SLC39A1	3.99796e-13	0.195905	0.097	0.006	1.46329e-08
LINC00840	3.99796e-13	0.339207	0.097	0.006	1.46329e-08
CASK	4.01509e-13	0.76206	0.46	0.165	1.46956e-08
HES1	4.08416e-13	0.981755	0.266	0.066	1.49484e-08
WASHC4	4.27118e-13	0.661595	0.395	0.129	1.56329e-08
CCDC3	4.33052e-13	1.09414	0.185	0.032	1.58501e-08
MYO1C	4.34179e-13	0.433267	0.395	0.121	1.58914e-08
SIMC1	4.39146e-13	0.428717	0.218	0.043	1.60732e-08
MICAL3	4.52832e-13	-1.06816	0.5	0.721	1.65741e-08
CEBPD	4.56952e-13	0.666347	0.226	0.048	1.67249e-08
GATAD2A	4.61015e-13	0.449215	0.379	0.115	1.68736e-08
SELENON	4.62512e-13	0.139735	0.185	0.03	1.69284e-08
NFIB	4.68537e-13	0.888579	0.879	0.738	1.71489e-08
PIP5K1B	4.68993e-13	-1.07311	0.298	0.604	1.71656e-08
FABP3	4.6923e-13	-1.44316	0.177	0.487	1.71743e-08
AC114757.1	4.70193e-13	0.565359	0.121	0.012	1.72095e-08
ARL13B	5.04568e-13	0.42128	0.266	0.063	1.84677e-08
AC007376.2	5.15046e-13	0.455249	0.121	0.012	1.88512e-08
RPS5	5.25185e-13	0.495192	0.315	0.085	1.92223e-08
ID2	5.31711e-13	0.384781	0.185	0.031	1.94611e-08
DENND4C	5.31868e-13	0.6575	0.508	0.197	1.94669e-08
DERA	5.32534e-13	0.690951	0.29	0.075	1.94913e-08
COL25A1	5.39967e-13	0.520036	0.161	0.023	1.97633e-08
MTM1	5.48112e-13	0.41112	0.282	0.068	2.00614e-08
ZC3H14	5.59701e-13	0.708721	0.298	0.08	2.04856e-08
FBN2	5.62417e-13	-1.78365	0.153	0.45	2.0585e-08
RALB	6.02577e-13	0.3367	0.218	0.043	2.20549e-08
ARHGEF2	6.18589e-13	0.512219	0.29	0.073	2.2641e-08
IMMP2L	6.25664e-13	1.47548	0.75	0.589	2.28999e-08
ZSWIM6	6.33307e-13	1.12845	0.766	0.451	2.31797e-08
TMC7	6.34759e-13	0.301198	0.121	0.012	2.32328e-08
CIITA	6.35148e-13	0.257153	0.169	0.025	2.3247e-08
GUK1	6.36532e-13	0.354127	0.242	0.052	2.32977e-08
TBX2	6.65976e-13	0.441803	0.161	0.023	2.43754e-08
HAT1	6.71924e-13	0.456431	0.25	0.057	2.45931e-08
SELENOM	6.76335e-13	0.29405	0.185	0.031	2.47545e-08
AC104695.4	6.79039e-13	0.240937	0.129	0.014	2.48535e-08
BLZF1	6.85167e-13	0.369964	0.185	0.031	2.50778e-08
GNAI1	6.87739e-13	0.727051	0.258	0.061	2.51719e-08
SERPINI1	6.94572e-13	0.451979	0.137	0.016	2.5422e-08
MIR181A1HG	7.06705e-13	0.845209	0.258	0.063	2.58661e-08
MAP3K7	7.12231e-13	0.639524	0.363	0.112	2.60684e-08
LYST	7.19308e-13	0.575864	0.419	0.138	2.63274e-08
AP2B1	7.23323e-13	0.745444	0.419	0.148	2.64743e-08
IFI6	7.32059e-13	0.421132	0.202	0.037	2.67941e-08
WASF2	7.51485e-13	0.554061	0.476	0.173	2.75051e-08
CASKIN2	7.55118e-13	0.395772	0.185	0.031	2.76381e-08
PAK2	7.61626e-13	0.602927	0.419	0.141	2.78763e-08
HSPA12B	7.74825e-13	0.314273	0.161	0.023	2.83594e-08
NXN	7.91429e-13	0.894847	0.565	0.234	2.89671e-08
ETV3	7.98956e-13	0.246029	0.129	0.014	2.92426e-08
SMAD6	7.99703e-13	0.761938	0.274	0.07	2.92699e-08
TMEM62	8.17022e-13	0.461339	0.202	0.038	2.99038e-08
RPL10	8.45358e-13	0.786825	0.492	0.189	3.09409e-08
C5orf24	8.50876e-13	0.472758	0.218	0.044	3.11429e-08
GET1	8.5134e-13	0.289218	0.137	0.016	3.11599e-08
PKN1	8.53902e-13	0.436002	0.234	0.05	3.12537e-08
STIM1	8.54087e-13	0.703216	0.516	0.196	3.12605e-08
SNCAIP	8.55456e-13	0.395466	0.129	0.014	3.13106e-08
TBRG1	8.67964e-13	0.353973	0.234	0.05	3.17683e-08
VTA1	8.73881e-13	0.424963	0.194	0.035	3.19849e-08
MTMR10	8.79281e-13	0.560616	0.266	0.065	3.21826e-08
MYH9	8.98033e-13	0.868931	0.806	0.467	3.28689e-08
AGO2	9.14183e-13	0.568709	0.468	0.169	3.346e-08
ARHGDIB	9.26745e-13	0.360326	0.177	0.029	3.39198e-08
RPL26	9.34374e-13	0.455988	0.298	0.076	3.4199e-08
COX17	9.37508e-13	0.402461	0.21	0.041	3.43137e-08
CNTNAP3	9.38358e-13	0.509706	0.202	0.038	3.43448e-08
SLFN12L	9.88679e-13	0.222206	0.089	0.005	3.61867e-08
SEPTIN2	9.88943e-13	0.555364	0.492	0.178	3.61963e-08
CFI	9.91712e-13	0.341975	0.105	0.008	3.62977e-08
ITPRIPL2	1.01767e-12	0.340244	0.137	0.016	3.72479e-08
PLAU	1.02354e-12	0.245002	0.089	0.005	3.74625e-08
ACTA2	1.02439e-12	1.38791	0.274	0.073	3.74936e-08
ATP6V1G1	1.03207e-12	0.219686	0.153	0.021	3.77749e-08
AC090348.1	1.03932e-12	-1.43105	0.153	0.465	3.804e-08
TMEM273	1.04978e-12	0.426719	0.234	0.05	3.8423e-08
MGAT4C	1.05415e-12	-1.55892	0.194	0.492	3.8583e-08
MYL6	1.06618e-12	0.575835	0.492	0.181	3.90234e-08
CDK13	1.07081e-12	0.747141	0.677	0.317	3.91927e-08
CABP1	1.07451e-12	0.302683	0.105	0.008	3.93281e-08
GIMAP1	1.077e-12	0.252062	0.137	0.016	3.94193e-08
TM6SF1	1.08533e-12	0.200186	0.105	0.008	3.9724e-08
IL27RA	1.1525e-12	0.33918	0.105	0.008	4.21825e-08
ZNF654	1.15362e-12	0.688712	0.427	0.152	4.22238e-08
EFCAB14	1.16022e-12	0.448935	0.258	0.06	4.24654e-08
TMEM109	1.16227e-12	0.200386	0.153	0.021	4.25403e-08
MLLT6	1.1833e-12	0.484922	0.315	0.087	4.33099e-08
COPA	1.26505e-12	0.705085	0.411	0.144	4.63022e-08
YWHAH	1.28473e-12	0.38216	0.185	0.032	4.70224e-08
MGMT	1.28481e-12	0.831735	0.427	0.152	4.70253e-08
PARP10	1.31234e-12	0.184874	0.105	0.008	4.80328e-08
PTMS	1.36549e-12	0.40561	0.25	0.057	4.99784e-08
ZHX3	1.37676e-12	0.834023	0.476	0.185	5.03908e-08
TSNAX	1.39532e-12	0.64037	0.282	0.074	5.10702e-08
MTMR2	1.50262e-12	0.703393	0.282	0.075	5.49973e-08
ERBIN	1.51394e-12	0.835131	0.597	0.269	5.54117e-08
SLC25A32	1.52219e-12	0.432021	0.258	0.061	5.57136e-08
EML1	1.55207e-12	0.841218	0.492	0.195	5.68071e-08
TNPO3	1.59448e-12	0.428571	0.306	0.083	5.83595e-08
PRDX1	1.6711e-12	0.379699	0.185	0.032	6.11638e-08
SEMA3C	1.69295e-12	-1.53626	0.145	0.448	6.19638e-08
SAMD9L	1.70276e-12	0.430305	0.161	0.024	6.23228e-08
IL6ST	1.72056e-12	0.74016	0.484	0.187	6.29742e-08
TTC17	1.72445e-12	0.801671	0.685	0.352	6.31165e-08
ASAP1	1.78068e-12	1.00222	0.774	0.518	6.51746e-08
ANKRD50	1.79216e-12	0.452167	0.202	0.039	6.5595e-08
CBWD5	1.82503e-12	0.286225	0.113	0.01	6.67981e-08
IFNGR1	1.85343e-12	0.572384	0.298	0.08	6.78375e-08
ENAH	1.86659e-12	0.963736	0.613	0.313	6.8319e-08
LINC00551	1.87641e-12	0.26135	0.081	0.003	6.86784e-08
LSM6	1.87644e-12	0.337147	0.113	0.01	6.86795e-08
ZNF345	1.89558e-12	0.523945	0.21	0.043	6.93802e-08
MOB1A	1.89872e-12	0.274507	0.202	0.038	6.94952e-08
RPL15	1.97034e-12	0.47135	0.355	0.107	7.21164e-08
PTGES3	2.0088e-12	0.543199	0.581	0.242	7.35241e-08
THRB	2.03591e-12	-1.30889	0.25	0.538	7.45163e-08
PLSCR3	2.06941e-12	0.133691	0.081	0.003	7.57425e-08
KCNQ2	2.06941e-12	0.289798	0.081	0.003	7.57425e-08
TMSB15B-AS1	2.06941e-12	0.292636	0.081	0.003	7.57425e-08
SGCE	2.07786e-12	0.331284	0.177	0.03	7.60519e-08
H2AFY	2.122e-12	0.461275	0.427	0.145	7.76673e-08
OAS3	2.13572e-12	0.266331	0.113	0.01	7.81696e-08
CRMP1	2.1467e-12	0.18526	0.081	0.003	7.85714e-08
ZBTB33	2.1467e-12	0.268919	0.081	0.003	7.85714e-08
TSC22D1	2.15955e-12	0.856313	0.54	0.238	7.90415e-08
NUTM2A-AS1	2.20562e-12	0.670725	0.444	0.162	8.0728e-08
TAF13	2.22355e-12	0.446606	0.21	0.043	8.13841e-08
CHM	2.22701e-12	0.586976	0.355	0.11	8.15109e-08
WNT2B	2.23655e-12	0.329303	0.161	0.024	8.18598e-08
OSBPL5	2.23952e-12	0.473654	0.234	0.052	8.19686e-08
SNRK	2.2971e-12	0.919081	0.524	0.227	8.40761e-08
AFAP1L2	2.34263e-12	0.445813	0.121	0.013	8.57426e-08
FAM155A	2.40066e-12	1.22657	0.194	0.037	8.78664e-08
PLK3	2.45254e-12	0.208298	0.113	0.01	8.97654e-08
CPM	2.45749e-12	0.511414	0.137	0.017	8.99466e-08
ZNF641	2.47684e-12	0.364016	0.137	0.017	9.06548e-08
EIF5A	2.4786e-12	0.353601	0.145	0.02	9.07191e-08
VPS26A	2.50992e-12	0.375839	0.266	0.065	9.18657e-08
ANGPT2	2.53288e-12	0.306343	0.121	0.013	9.2706e-08
HOXB4	2.56096e-12	0.132668	0.056	0	9.37337e-08
KCTD15	2.56096e-12	0.127503	0.056	0	9.37337e-08
LINC01673	2.56096e-12	0.177676	0.056	0	9.37337e-08
LTA4H	2.60975e-12	0.449625	0.169	0.028	9.55194e-08
EEF1G	2.63055e-12	0.435479	0.323	0.092	9.62808e-08
HIST1H4C	2.69126e-12	0.321628	0.121	0.013	9.85027e-08
TSPAN2	2.70176e-12	0.355363	0.153	0.022	9.88872e-08
APOL1	2.78607e-12	0.356122	0.121	0.013	1.01973e-07
SH3RF1	2.80597e-12	1.10075	0.371	0.126	1.02701e-07
ENDOD1	2.85817e-12	0.387529	0.145	0.02	1.04612e-07
SLC4A4	2.89075e-12	-1.42129	0.177	0.467	1.05804e-07
TAF10	2.90921e-12	0.27553	0.121	0.013	1.0648e-07
ARID2	2.99356e-12	0.852952	0.589	0.29	1.09567e-07
MTURN	3.00984e-12	0.208767	0.153	0.022	1.10163e-07
HYAL1	3.03769e-12	0.293174	0.121	0.013	1.11182e-07
SESTD1	3.05738e-12	0.893492	0.387	0.134	1.11903e-07
RPS11	3.05739e-12	0.635735	0.395	0.133	1.11903e-07
GATA4	3.07935e-12	-1.25613	0.29	0.571	1.12707e-07
SCAF4	3.10688e-12	0.559195	0.339	0.102	1.13715e-07
HIGD1B	3.15831e-12	0.317971	0.097	0.007	1.15597e-07
CDK9	3.19111e-12	0.2388	0.097	0.007	1.16798e-07
FDPS	3.21453e-12	0.402225	0.21	0.043	1.17655e-07
ITPR3	3.28224e-12	0.392517	0.137	0.017	1.20133e-07
CCM2L	3.2831e-12	0.23636	0.121	0.013	1.20165e-07
SPARC	3.30595e-12	1.09946	0.379	0.132	1.21001e-07
UBASH3B	3.36921e-12	0.291533	0.145	0.02	1.23317e-07
STAT1	3.38213e-12	0.408955	0.21	0.043	1.23789e-07
NUTM2B-AS1	3.38595e-12	0.764282	0.508	0.213	1.23929e-07
TUBB	3.39386e-12	0.436032	0.266	0.065	1.24219e-07
SENP5	3.3964e-12	0.553202	0.427	0.148	1.24312e-07
ZC2HC1A	3.43054e-12	0.490493	0.177	0.031	1.25561e-07
ZNF782	3.45324e-12	0.361099	0.266	0.066	1.26392e-07
POLA1	3.50479e-12	0.757732	0.419	0.153	1.28279e-07
MARCKSL1	3.51799e-12	0.164412	0.073	0.002	1.28762e-07
AC091563.1	3.51799e-12	0.165469	0.073	0.002	1.28762e-07
RPL12	3.55975e-12	0.274752	0.242	0.054	1.3029e-07
MCC	3.57105e-12	0.97288	0.702	0.39	1.30704e-07
AL138689.2	3.61166e-12	0.105803	0.073	0.002	1.3219e-07
CDKAL1	3.65592e-12	0.881083	0.734	0.409	1.3381e-07
SETD5	3.66195e-12	0.755749	0.694	0.345	1.34031e-07
RAB8B	3.71117e-12	0.613302	0.25	0.06	1.35832e-07
DTX3L	3.736e-12	0.203057	0.121	0.013	1.36741e-07
TRIM56	3.81809e-12	0.451262	0.266	0.066	1.39746e-07
AC104083.1	3.90016e-12	0.160447	0.121	0.013	1.4275e-07
OCIAD2	3.92638e-12	0.155558	0.065	0.001	1.43709e-07
TRIM21	3.92638e-12	0.186963	0.065	0.001	1.43709e-07
DLGAP1-AS4	3.92638e-12	0.222577	0.065	0.001	1.43709e-07
PCSK5	3.92864e-12	2.55882	0.379	0.137	1.43792e-07
RPS9	3.94304e-12	0.468689	0.379	0.121	1.44319e-07
PATJ	4.03523e-12	-1.20451	0.339	0.596	1.47693e-07
USP33	4.03724e-12	0.61967	0.403	0.139	1.47767e-07
ZNF24	4.03739e-12	0.471001	0.25	0.06	1.47772e-07
CHROMR	4.07858e-12	0.288205	0.129	0.015	1.4928e-07
AC092384.1	4.28255e-12	0.193608	0.065	0.001	1.56746e-07
MROH7	4.34547e-12	-1.41017	0.218	0.497	1.59048e-07
KPNA1	4.35969e-12	0.670028	0.379	0.127	1.59569e-07
ZNF266	4.36482e-12	0.322471	0.185	0.034	1.59757e-07
TBC1D15	4.37772e-12	0.436301	0.331	0.096	1.60229e-07
ZNF217	4.40038e-12	0.425396	0.194	0.037	1.61058e-07
RGS12	4.42388e-12	0.553914	0.274	0.072	1.61918e-07
TTC14	4.52386e-12	0.466029	0.355	0.11	1.65578e-07
REL	4.58115e-12	0.619529	0.234	0.054	1.67675e-07
SERINC1	4.64946e-12	0.356643	0.315	0.088	1.70175e-07
TPM3	4.65044e-12	0.50993	0.323	0.094	1.70211e-07
PPM1F	4.70435e-12	0.417046	0.153	0.023	1.72184e-07
MIF	4.83358e-12	0.295365	0.202	0.039	1.76914e-07
DTNBP1	4.92316e-12	0.444636	0.29	0.078	1.80192e-07
ARL6IP4	5.09863e-12	0.276035	0.218	0.045	1.86615e-07
FTX	5.21789e-12	0.799531	0.919	0.779	1.9098e-07
CDC73	5.30486e-12	0.718898	0.54	0.233	1.94163e-07
NDUFA4L2	5.35111e-12	0.81565	0.185	0.035	1.95856e-07
PABPC1	5.43507e-12	0.669904	0.46	0.176	1.98929e-07
CCNT2	5.6448e-12	0.543595	0.363	0.116	2.06605e-07
RPS27	5.66578e-12	0.675946	0.484	0.18	2.07373e-07
UBE2E1	5.73892e-12	0.757158	0.54	0.234	2.1005e-07
ATN1	5.88194e-12	0.468229	0.379	0.122	2.15285e-07
RPL37A	5.92728e-12	0.857867	0.476	0.19	2.16944e-07
ITPKC	5.93156e-12	0.40179	0.153	0.023	2.17101e-07
HERC4	6.11926e-12	0.588045	0.677	0.321	2.23971e-07
INPP4A	6.13226e-12	0.722626	0.452	0.17	2.24447e-07
CC2D2B	6.31504e-12	0.406902	0.105	0.009	2.31137e-07
GPR176	6.31504e-12	0.462596	0.105	0.009	2.31137e-07
API5	6.31569e-12	0.352165	0.234	0.053	2.31161e-07
PLAGL1	6.42015e-12	0.794413	0.371	0.125	2.34984e-07
MINDY3	6.62466e-12	0.670564	0.298	0.086	2.42469e-07
LEPROT	6.77268e-12	0.257556	0.218	0.046	2.47887e-07
NHEJ1	6.82268e-12	0.305315	0.153	0.023	2.49717e-07
STON1	7.00614e-12	0.270149	0.105	0.009	2.56432e-07
CASD1	7.04171e-12	0.636492	0.306	0.09	2.57734e-07
TMEM255B	7.07253e-12	0.319224	0.105	0.009	2.58861e-07
RUSC2	7.31807e-12	0.647451	0.371	0.124	2.67849e-07
VTI1A	7.35245e-12	0.952357	0.669	0.362	2.69107e-07
EFHD2	7.4138e-12	0.177016	0.105	0.009	2.71353e-07
COPB2	7.49552e-12	0.331296	0.21	0.044	2.74343e-07
AC090517.5	7.66162e-12	0.447886	0.234	0.054	2.80423e-07
FCN3	7.69838e-12	0.196714	0.105	0.009	2.81768e-07
LINC01010	7.88748e-12	0.514818	0.145	0.021	2.8869e-07
ATRX	7.90362e-12	0.772757	0.742	0.408	2.8928e-07
ARGLU1	8.48317e-12	0.758022	0.782	0.423	3.10492e-07
PIKFYVE	8.51457e-12	0.563099	0.403	0.14	3.11642e-07
GMFB	8.53577e-12	0.276481	0.137	0.019	3.12418e-07
LMBRD1	8.60984e-12	0.534158	0.427	0.154	3.15129e-07
ADAMTS1	8.62959e-12	1.52563	0.46	0.212	3.15852e-07
HIVEP2	8.82641e-12	1.05957	0.653	0.358	3.23055e-07
MIER1	8.90246e-12	0.604743	0.347	0.11	3.25839e-07
S100A11	9.03022e-12	0.250252	0.194	0.037	3.30515e-07
SMC3	9.33457e-12	0.387892	0.218	0.048	3.41655e-07
CHMP5	9.4992e-12	0.331347	0.121	0.014	3.4768e-07
TRIR	9.50214e-12	0.190115	0.177	0.031	3.47788e-07
ZFAND3	9.53334e-12	0.910574	0.855	0.603	3.4893e-07
FAM110D	9.56781e-12	0.247421	0.089	0.006	3.50192e-07
SFXN3	9.56781e-12	0.231603	0.089	0.006	3.50192e-07
OVCH1	9.67082e-12	0.216816	0.089	0.006	3.53962e-07
THSD1	9.70956e-12	0.357733	0.161	0.027	3.5538e-07
SNW1	9.91363e-12	0.42507	0.242	0.058	3.62849e-07
CCZ1B	9.91837e-12	0.244074	0.113	0.012	3.63022e-07
RPS21	1.01067e-11	0.338312	0.25	0.06	3.69916e-07
BAIAP3	1.02024e-11	0.206767	0.089	0.006	3.73418e-07
MALT1	1.02182e-11	0.671101	0.468	0.183	3.73997e-07
NCOA3	1.02196e-11	0.960702	0.677	0.356	3.74049e-07
MYH6	1.03137e-11	-1.66159	0.194	0.481	3.77491e-07
PDLIM2	1.0423e-11	0.138282	0.089	0.006	3.81491e-07
CADM1	1.04814e-11	-1.45368	0.169	0.455	3.83629e-07
BCL6B	1.05374e-11	0.291849	0.137	0.019	3.85681e-07
PCDHB16	1.06482e-11	0.167364	0.089	0.006	3.89734e-07
PAM	1.06653e-11	-0.758037	0.774	0.834	3.90362e-07
DNAJC18	1.06813e-11	0.306638	0.145	0.021	3.90946e-07
KMT2C	1.06841e-11	0.75036	0.774	0.462	3.91048e-07
NEK10	1.07998e-11	-1.49658	0.161	0.438	3.95285e-07
CLIC1	1.08361e-11	0.226441	0.145	0.021	3.96613e-07
EIF2AK2	1.08614e-11	0.523056	0.242	0.059	3.97537e-07
LMO2	1.08782e-11	0.183104	0.089	0.006	3.98152e-07
RPL18A	1.09267e-11	0.384338	0.282	0.075	3.99927e-07
CAMK2D	1.09289e-11	-0.875381	0.685	0.775	4.00007e-07
HELB	1.09351e-11	0.299891	0.121	0.014	4.00234e-07
PPP2R1B	1.10543e-11	0.34661	0.194	0.038	4.04597e-07
RILPL1	1.10653e-11	-1.2237	0.266	0.543	4.05003e-07
MX2	1.12096e-11	0.291197	0.121	0.014	4.10284e-07
ARL2BP	1.1213e-11	0.212364	0.113	0.012	4.10406e-07
TAF1C	1.13964e-11	0.265404	0.121	0.014	4.1712e-07
ANGPT1	1.16398e-11	0.539832	0.202	0.042	4.26027e-07
FOXN2	1.16695e-11	0.36984	0.234	0.054	4.27115e-07
RPS16	1.1713e-11	0.567073	0.355	0.116	4.28709e-07
SLC66A2	1.18908e-11	0.440846	0.226	0.052	4.35214e-07
RAD21	1.21603e-11	0.372877	0.282	0.075	4.45079e-07
DEDD	1.24796e-11	0.236451	0.121	0.014	4.56764e-07
RPL14	1.25873e-11	0.494666	0.29	0.08	4.60706e-07
GPR89B	1.294e-11	0.35019	0.161	0.027	4.73618e-07
YIPF5	1.30089e-11	0.143413	0.113	0.012	4.76138e-07
PDGFRB	1.31002e-11	0.904008	0.242	0.061	4.79481e-07
RSRC1	1.33601e-11	0.85523	0.403	0.151	4.88992e-07
AKAP17A	1.3833e-11	0.240732	0.121	0.014	5.06303e-07
RBP7	1.39007e-11	0.272428	0.137	0.019	5.08779e-07
TNFRSF10B	1.39524e-11	0.655619	0.234	0.057	5.10671e-07
PRDM2	1.39779e-11	0.507212	0.484	0.187	5.11606e-07
SCN8A	1.40048e-11	0.226506	0.121	0.014	5.12591e-07
CNOT2	1.41787e-11	0.644737	0.516	0.212	5.18956e-07
FBXO3	1.4323e-11	0.410205	0.298	0.085	5.24237e-07
BTG1	1.43664e-11	0.339017	0.177	0.032	5.25826e-07
GALNT2	1.44339e-11	0.564809	0.339	0.107	5.28295e-07
CARS	1.44705e-11	0.282086	0.161	0.027	5.29636e-07
PRDM1	1.47131e-11	0.184913	0.121	0.014	5.38514e-07
HLA-DRA	1.47586e-11	0.69606	0.185	0.036	5.4018e-07
GNG7	1.48519e-11	-1.36305	0.25	0.526	5.43594e-07
RFX7	1.5206e-11	0.769538	0.411	0.153	5.56554e-07
NTF3	1.54564e-11	0.174434	0.121	0.014	5.6572e-07
FAM91A1	1.55624e-11	0.50633	0.234	0.057	5.69598e-07
EDEM3	1.6132e-11	0.412655	0.298	0.085	5.90448e-07
CD44	1.61723e-11	0.881513	0.169	0.03	5.91921e-07
PPP6C	1.68652e-11	0.368766	0.298	0.083	6.17284e-07
CAP1	1.71933e-11	0.395677	0.242	0.059	6.29293e-07
VPS37B	1.74196e-11	0.811351	0.395	0.141	6.37576e-07
MTRF1L	1.76064e-11	0.377282	0.185	0.036	6.44413e-07
KATNBL1	1.76435e-11	0.617344	0.371	0.126	6.45769e-07
RAB22A	1.77438e-11	0.509276	0.242	0.06	6.49442e-07
RPS29	1.80444e-11	0.410532	0.411	0.141	6.60442e-07
INF2	1.81679e-11	0.339134	0.202	0.042	6.64963e-07
VLDLR-AS1	1.82115e-11	-1.40146	0.105	0.39	6.66558e-07
TMEM87A	1.83731e-11	0.504247	0.339	0.107	6.72473e-07
BMPR1A	1.9114e-11	-1.26074	0.315	0.561	6.99591e-07
ANKRD10	1.9321e-11	0.676965	0.371	0.127	7.07167e-07
ZFAS1	1.9521e-11	0.226656	0.194	0.038	7.14489e-07
GLS	1.95841e-11	0.687113	0.46	0.184	7.16798e-07
ATAD2B	1.96425e-11	0.677191	0.516	0.214	7.18935e-07
WBP1L	1.98508e-11	0.373948	0.298	0.085	7.26558e-07
GATA3	2.04031e-11	0.468913	0.097	0.008	7.46773e-07
ADORA2B	2.12092e-11	0.443334	0.097	0.008	7.76277e-07
AC078883.1	2.14155e-11	0.328733	0.097	0.008	7.83829e-07
ZSCAN31	2.1487e-11	0.421229	0.185	0.036	7.86445e-07
ARHGEF12	2.16129e-11	0.813518	0.75	0.45	7.91053e-07
NRIP1	2.19636e-11	0.586321	0.476	0.187	8.03888e-07
SLC20A2	2.24206e-11	-1.14393	0.331	0.6	8.20618e-07
PAXIP1-AS2	2.24771e-11	0.294646	0.097	0.008	8.22684e-07
TRAPPC10	2.26571e-11	0.656612	0.323	0.103	8.29271e-07
PPP2R2A	2.27433e-11	0.686855	0.556	0.254	8.32428e-07
STAM2	2.27441e-11	0.605333	0.29	0.083	8.32455e-07
ARMH4	2.27943e-11	0.746298	0.315	0.1	8.34294e-07
MTMR9	2.27954e-11	0.354126	0.21	0.046	8.34335e-07
NCK1	2.29565e-11	0.531882	0.282	0.079	8.40231e-07
CASP1	2.30372e-11	0.229125	0.081	0.005	8.43185e-07
FLNC	2.30415e-11	-1.34327	0.185	0.475	8.43343e-07
HSPA1B	2.32472e-11	0.605067	0.363	0.124	8.50872e-07
C1QTNF1	2.33463e-11	0.383126	0.145	0.022	8.54498e-07
AC005753.2	2.33633e-11	0.196896	0.097	0.008	8.5512e-07
ATXN2L	2.35917e-11	0.248328	0.185	0.036	8.63479e-07
GRAMD1A	2.46436e-11	0.265983	0.226	0.051	9.0198e-07
HERC5	2.47571e-11	0.198136	0.097	0.008	9.06134e-07
ARHGAP4	2.492e-11	0.192132	0.081	0.005	9.12097e-07
PSMC6	2.51462e-11	0.377904	0.274	0.075	9.20377e-07
KLHL9	2.53206e-11	0.238571	0.153	0.024	9.2676e-07
CYTH2	2.57435e-11	0.361687	0.145	0.022	9.42238e-07
CAPZB	2.58132e-11	0.725371	0.621	0.3	9.44787e-07
GPHN	2.59552e-11	0.88231	0.863	0.592	9.49988e-07
TRIM47	2.60627e-11	0.136213	0.081	0.005	9.5392e-07
PFDN5	2.62018e-11	0.323942	0.194	0.039	9.59012e-07
P2RY14	2.62987e-11	0.878187	0.129	0.017	9.62559e-07
SMAGP	2.64862e-11	0.171565	0.097	0.008	9.69422e-07
LYN	2.65946e-11	0.711214	0.161	0.028	9.73389e-07
STX3	2.66091e-11	0.508783	0.234	0.058	9.73921e-07
TMEM132A	2.66531e-11	0.186793	0.081	0.005	9.7553e-07
CSNK1G3	2.71491e-11	0.634649	0.323	0.102	9.93685e-07
EGLN2	2.74674e-11	0.400567	0.137	0.02	1.00533e-06
SSBP2	2.80351e-11	0.894382	0.694	0.39	1.02611e-06
KLF12	2.83916e-11	1.0357	0.782	0.527	1.03916e-06
FAM107A	2.84002e-11	0.71378	0.403	0.147	1.03947e-06
SLC27A6	2.89306e-11	-1.5018	0.169	0.437	1.05889e-06
RAP1A	2.96445e-11	0.778524	0.548	0.254	1.08502e-06
STK33	3.06061e-11	-1.32486	0.137	0.417	1.12021e-06
TGS1	3.09799e-11	0.511033	0.169	0.031	1.1339e-06
SPTLC3	3.11002e-11	0.527783	0.258	0.068	1.1383e-06
DIAPH2-AS1	3.14991e-11	0.227891	0.105	0.01	1.1529e-06
EIF4G3	3.21101e-11	0.658094	0.677	0.327	1.17526e-06
MACROD2	3.26579e-11	-1.44908	0.25	0.505	1.19531e-06
MDFIC	3.28142e-11	0.721531	0.347	0.117	1.20103e-06
RPL23A	3.32791e-11	0.547037	0.298	0.088	1.21805e-06
MMP24OS	3.33688e-11	0.481224	0.202	0.044	1.22133e-06
SLC37A1	3.4376e-11	0.232809	0.137	0.02	1.25819e-06
TGFB1I1	3.45385e-11	0.380553	0.129	0.017	1.26414e-06
NENF	3.5443e-11	0.192219	0.145	0.022	1.29725e-06
PGM2L1	3.60112e-11	0.214822	0.105	0.01	1.31805e-06
UBL3	3.61189e-11	0.644365	0.411	0.153	1.32199e-06
C4orf33	3.61431e-11	0.378767	0.113	0.013	1.32287e-06
SLC6A1	3.6447e-11	0.312348	0.113	0.013	1.334e-06
PTPRN2	3.66107e-11	0.407399	0.161	0.028	1.33999e-06
RNPEP	3.66587e-11	0.300446	0.105	0.01	1.34175e-06
GCH1	3.69477e-11	0.294514	0.137	0.02	1.35232e-06
ZNF106	3.9002e-11	-1.20397	0.315	0.559	1.42751e-06
TGFB3	3.90159e-11	0.307912	0.105	0.01	1.42802e-06
NUDT4	4.02642e-11	-1.45845	0.25	0.497	1.47371e-06
NBPF15	4.07664e-11	0.261253	0.129	0.017	1.49209e-06
RPS3	4.13083e-11	0.557027	0.363	0.121	1.51193e-06
WWC2	4.15173e-11	0.680864	0.613	0.282	1.51957e-06
RBM17	4.26168e-11	0.342318	0.29	0.081	1.55982e-06
BMI1	4.26425e-11	0.185726	0.105	0.01	1.56076e-06
SSBP1	4.26827e-11	0.257925	0.177	0.034	1.56223e-06
TMEM182	4.27809e-11	-1.38061	0.121	0.394	1.56583e-06
ITGB3	4.30227e-11	0.221609	0.105	0.01	1.57467e-06
NUDCD1	4.35014e-11	0.295875	0.185	0.037	1.5922e-06
NFATC2IP	4.36697e-11	0.5494	0.282	0.081	1.59836e-06
TRIM63	4.37266e-11	-1.35966	0.137	0.411	1.60044e-06
CCZ1	4.40738e-11	0.189156	0.121	0.015	1.61315e-06
POU2F1	4.43101e-11	0.63733	0.524	0.228	1.62179e-06
PPP4R1	4.53358e-11	0.578937	0.355	0.121	1.65934e-06
AC011447.3	4.54524e-11	0.409137	0.145	0.023	1.6636e-06
ATP2B1	4.55401e-11	0.883396	0.323	0.103	1.66681e-06
GIT2	4.62542e-11	0.494862	0.387	0.13	1.69295e-06
DPY19L2	4.65484e-11	-1.27677	0.21	0.476	1.70372e-06
DEGS1	4.70194e-11	0.242312	0.129	0.017	1.72096e-06
EEF1A1	4.70312e-11	0.920591	0.468	0.199	1.72139e-06
STXBP3	4.72849e-11	0.418387	0.266	0.073	1.73067e-06
B4GALT5	4.766e-11	0.819452	0.395	0.148	1.7444e-06
COL4A2	4.79095e-11	0.985762	0.677	0.36	1.75354e-06
ATG4C	4.79672e-11	0.431365	0.234	0.059	1.75565e-06
UGCG	4.85032e-11	0.686909	0.29	0.086	1.77526e-06
SYNPO2	4.87796e-11	-0.662929	0.411	0.688	1.78538e-06
RABGAP1	5.05341e-11	0.702456	0.5	0.213	1.8496e-06
FAM177A1	5.11381e-11	0.437126	0.315	0.096	1.8717e-06
CRBN	5.13303e-11	0.518641	0.258	0.071	1.87874e-06
TNFSF12	5.17337e-11	0.165177	0.113	0.013	1.89351e-06
KHSRP	5.18736e-11	0.271173	0.169	0.031	1.89863e-06
FMR1	5.19337e-11	0.381616	0.202	0.044	1.90083e-06
KIAA1328	5.26173e-11	0.761049	0.484	0.202	1.92585e-06
CUX1	5.40319e-11	-0.8739	0.589	0.735	1.97762e-06
BTNL8	5.49065e-11	0.203512	0.073	0.003	2.00963e-06
MRPL54	5.55635e-11	0.199516	0.073	0.003	2.03368e-06
PRELID2	5.5779e-11	-1.4112	0.363	0.601	2.04157e-06
STAT2	5.57938e-11	0.237035	0.226	0.053	2.04211e-06
FAM27C	5.62282e-11	0.334034	0.073	0.003	2.05801e-06
FMNL2	5.68076e-11	0.769746	0.411	0.154	2.07922e-06
SPRED2	5.76275e-11	0.868211	0.435	0.175	2.10922e-06
TSR2	5.82694e-11	0.206272	0.073	0.003	2.13272e-06
SLC26A3	5.91335e-11	-1.35205	0.048	0.334	2.16435e-06
SH3PXD2B	5.91895e-11	0.543886	0.169	0.032	2.16639e-06
CNST	5.95247e-11	0.364695	0.323	0.098	2.17867e-06
HMG20B	5.95684e-11	0.131164	0.113	0.013	2.18026e-06
EPCAM-DT	5.96186e-11	0.486305	0.145	0.023	2.1821e-06
LINC02185	5.96702e-11	0.158309	0.073	0.003	2.18399e-06
AIDA	5.98248e-11	0.270157	0.185	0.037	2.18965e-06
LINC02802	6.03829e-11	0.204209	0.073	0.003	2.21007e-06
ARRDC2	6.03829e-11	0.201221	0.073	0.003	2.21007e-06
DCAF16	6.0442e-11	0.257257	0.194	0.041	2.21224e-06
NUP88	6.05124e-11	0.34415	0.218	0.051	2.21482e-06
RELL1	6.0612e-11	0.564957	0.274	0.079	2.21846e-06
TMEM128	6.1104e-11	0.0974271	0.073	0.003	2.23647e-06
AP002495.1	6.12528e-11	0.368175	0.145	0.023	2.24191e-06
CENPQ	6.13925e-11	0.262283	0.089	0.007	2.24703e-06
TRERF1	6.15845e-11	0.53312	0.202	0.044	2.25405e-06
IFIT3	6.27735e-11	0.139317	0.121	0.015	2.29757e-06
MBD2	6.60521e-11	0.46254	0.363	0.123	2.41757e-06
ELMSAN1	6.61386e-11	0.393105	0.258	0.068	2.42074e-06
C11orf58	6.68309e-11	0.318893	0.331	0.102	2.44608e-06
EHBP1L1	6.93167e-11	0.224771	0.226	0.053	2.53706e-06
LINC01578	6.94676e-11	0.547573	0.363	0.125	2.54258e-06
POMP	6.96309e-11	0.442189	0.25	0.066	2.54856e-06
ZRANB2	7.03293e-11	0.473931	0.468	0.182	2.57412e-06
SCN3A	7.13063e-11	0.291725	0.089	0.007	2.60988e-06
BAZ2B	7.30027e-11	0.855437	0.798	0.516	2.67197e-06
ANKRD12	7.54841e-11	0.770747	0.758	0.45	2.76279e-06
DAAM2	7.73579e-11	0.35671	0.202	0.044	2.83138e-06
HIC1	7.98204e-11	0.335296	0.161	0.029	2.92151e-06
LSM8	8.07429e-11	0.213879	0.145	0.023	2.95527e-06
LINC-PINT	8.28428e-11	0.257372	0.161	0.029	3.03213e-06
MFSD14A	8.41018e-11	0.348592	0.282	0.08	3.07821e-06
SH3BGRL2	8.42164e-11	0.497225	0.194	0.042	3.0824e-06
GCNT2	8.61656e-11	-1.22988	0.226	0.495	3.15375e-06
RPS15A	8.91275e-11	0.470186	0.339	0.11	3.26215e-06
CNTRL	9.0338e-11	0.355654	0.194	0.042	3.30646e-06
MIR222HG	9.21578e-11	0.386607	0.137	0.021	3.37307e-06
CYLD	9.40039e-11	0.482519	0.258	0.071	3.44064e-06
EIF2S3	9.40179e-11	0.340466	0.234	0.058	3.44115e-06
AEBP2	9.46371e-11	0.563087	0.403	0.149	3.46381e-06
ZNF618	9.47618e-11	0.363246	0.137	0.021	3.46838e-06
SNTB2	9.55894e-11	0.473079	0.226	0.056	3.49867e-06
GUCY1B1	9.63983e-11	0.705241	0.226	0.058	3.52827e-06
CWC22	9.77763e-11	0.400811	0.21	0.049	3.57871e-06
STK4	9.79573e-11	0.499695	0.242	0.064	3.58533e-06
RPL13	9.913e-11	0.796706	0.573	0.282	3.62826e-06
FAM76B	1.03371e-10	0.256662	0.137	0.021	3.7835e-06
PHF10	1.03529e-10	0.413991	0.177	0.036	3.78926e-06
CD82	1.03647e-10	0.400469	0.153	0.027	3.7936e-06
POC1B	1.04194e-10	0.343039	0.169	0.032	3.81361e-06
TM4SF18	1.05109e-10	0.294213	0.097	0.009	3.84708e-06
TDRD7	1.06655e-10	0.276777	0.137	0.021	3.90367e-06
SYTL2	1.06737e-10	0.58456	0.121	0.016	3.90667e-06
ADAMTSL4-AS1	1.07398e-10	0.288215	0.137	0.021	3.93087e-06
FUT1	1.08251e-10	0.215473	0.065	0.002	3.96211e-06
PARP8	1.08556e-10	0.619485	0.25	0.067	3.97326e-06
TM9SF2	1.09192e-10	0.366287	0.298	0.088	3.99653e-06
NEK7	1.1004e-10	0.793014	0.589	0.29	4.02756e-06
GCNT1	1.10539e-10	0.450517	0.169	0.032	4.04585e-06
CSRP3	1.10771e-10	-1.5441	0.202	0.454	4.05433e-06
KCTD10	1.13405e-10	0.406292	0.177	0.036	4.15073e-06
FAM89A	1.13946e-10	0.122179	0.065	0.002	4.17055e-06
EGFLAM	1.14717e-10	1.69443	0.218	0.058	4.19874e-06
TAB2	1.14872e-10	0.780342	0.379	0.144	4.20443e-06
SERTAD1	1.15115e-10	0.265578	0.137	0.021	4.21332e-06
USP13	1.17545e-10	-1.23689	0.185	0.451	4.30227e-06
DDAH2	1.18467e-10	0.180433	0.161	0.029	4.336e-06
ZNF117	1.19208e-10	0.437905	0.194	0.043	4.36313e-06
ETV6	1.20165e-10	0.970184	0.661	0.366	4.39816e-06
OSMR-AS1	1.20729e-10	0.426315	0.153	0.027	4.4188e-06
SMNDC1	1.21497e-10	0.292517	0.153	0.027	4.44693e-06
PKNOX1	1.2277e-10	0.368342	0.226	0.056	4.49349e-06
PRKAA1	1.22857e-10	0.420805	0.298	0.09	4.4967e-06
MAPK1IP1L	1.23014e-10	0.38624	0.339	0.11	4.50243e-06
HDX	1.27869e-10	0.631856	0.169	0.034	4.68014e-06
SMAD9	1.28067e-10	0.386853	0.121	0.016	4.68737e-06
MTMR12	1.29228e-10	0.430518	0.29	0.086	4.72987e-06
EIF3F	1.29472e-10	0.268158	0.194	0.042	4.7388e-06
TRPC4AP	1.30978e-10	0.492873	0.427	0.161	4.79394e-06
OGFR	1.34019e-10	0.215387	0.121	0.016	4.90523e-06
NRM	1.34418e-10	0.250496	0.056	0.001	4.91984e-06
POLE4	1.35592e-10	0.164343	0.097	0.009	4.96279e-06
MPP3	1.37694e-10	-1.46009	0.145	0.4	5.03975e-06
AC093801.1	1.38304e-10	0.114428	0.056	0.001	5.06207e-06
IER5L	1.3933e-10	0.167963	0.097	0.009	5.09962e-06
GPALPP1	1.39945e-10	0.457409	0.21	0.05	5.12214e-06
AC004889.1	1.40889e-10	0.361975	0.113	0.014	5.15666e-06
ZNF451	1.4146e-10	0.522177	0.379	0.136	5.17758e-06
C11orf96	1.41615e-10	0.447326	0.185	0.039	5.18324e-06
LINC02587	1.423e-10	0.192216	0.056	0.001	5.20831e-06
DEPP1	1.42378e-10	0.232758	0.121	0.016	5.21117e-06
DPYSL2	1.43111e-10	0.470307	0.395	0.143	5.23801e-06
TOR3A	1.43169e-10	0.1546	0.097	0.009	5.24013e-06
MYADM	1.4393e-10	0.580877	0.234	0.061	5.268e-06
AJ006995.1	1.4434e-10	0.181974	0.056	0.001	5.28297e-06
CYP4X1	1.44471e-10	0.237916	0.097	0.009	5.2878e-06
AL049838.1	1.46408e-10	0.0977107	0.056	0.001	5.35868e-06
WSCD1	1.46408e-10	0.190918	0.056	0.001	5.35868e-06
RCN1	1.49253e-10	0.229492	0.169	0.032	5.46281e-06
AMMECR1	1.50469e-10	0.576145	0.177	0.037	5.50733e-06
GSK3B	1.5061e-10	0.722859	0.718	0.445	5.51248e-06
GPR4	1.52533e-10	0.169309	0.097	0.009	5.58287e-06
CHTOP	1.53356e-10	0.303408	0.234	0.059	5.613e-06
P2RY8	1.56252e-10	0.313536	0.113	0.014	5.719e-06
RPS6KC1	1.56934e-10	0.606568	0.452	0.178	5.74395e-06
ITIH5	1.57954e-10	0.678225	0.21	0.051	5.78126e-06
RNF38	1.59786e-10	0.709255	0.524	0.228	5.84833e-06
LRRC37B	1.60481e-10	0.208043	0.153	0.027	5.87376e-06
CLEC2B	1.62588e-10	0.356133	0.113	0.014	5.95087e-06
GJC1	1.64522e-10	0.730124	0.234	0.061	6.02166e-06
SSUH2	1.66845e-10	0.273403	0.105	0.012	6.1067e-06
SRPRA	1.66845e-10	0.224127	0.105	0.012	6.1067e-06
NUS1	1.69438e-10	0.340214	0.226	0.057	6.2016e-06
KLF11	1.71117e-10	0.227754	0.105	0.012	6.26306e-06
EFCC1	1.73216e-10	0.37171	0.121	0.016	6.33986e-06
LRRN2	1.74629e-10	0.295269	0.113	0.014	6.39161e-06
PDE4C	1.74629e-10	0.367728	0.113	0.014	6.39161e-06
MITD1	1.7602e-10	0.211829	0.113	0.014	6.4425e-06
RPL30	1.76153e-10	0.402193	0.347	0.115	6.44738e-06
ZNF800	1.77647e-10	0.552562	0.331	0.111	6.50207e-06
ARHGAP27	1.77701e-10	0.397404	0.234	0.06	6.50405e-06
ITGA5	1.78478e-10	0.519517	0.298	0.092	6.53247e-06
COX4I2	1.78506e-10	0.27925	0.121	0.016	6.53349e-06
ENOPH1	1.81505e-10	0.213666	0.105	0.012	6.64325e-06
ASCC3	1.82919e-10	0.69453	0.492	0.211	6.69503e-06
PROSER1	1.83954e-10	0.214601	0.121	0.016	6.73289e-06
DTX3	1.86738e-10	0.268908	0.121	0.016	6.83481e-06
YLPM1	1.87171e-10	0.453484	0.395	0.145	6.85065e-06
SNIP1	1.87541e-10	0.192711	0.113	0.014	6.86418e-06
STX17	1.89235e-10	0.476905	0.298	0.093	6.9262e-06
AATF	1.97359e-10	0.401469	0.242	0.065	7.22354e-06
PIK3R1	1.98098e-10	-1.21541	0.331	0.562	7.25058e-06
ZNF678	1.99094e-10	0.362328	0.194	0.043	7.28704e-06
LINC02664	2.0149e-10	0.481644	0.081	0.006	7.37474e-06
SINHCAF	2.0149e-10	0.283967	0.081	0.006	7.37474e-06
FRG1	2.02537e-10	0.291857	0.161	0.03	7.41304e-06
LRRC8A	2.06346e-10	0.254665	0.202	0.045	7.55247e-06
MFNG	2.10003e-10	0.242378	0.081	0.006	7.68633e-06
SLC5A4	2.12186e-10	0.237611	0.081	0.006	7.76622e-06
HMGN5	2.12186e-10	0.26392	0.081	0.006	7.76622e-06
AC022126.1	2.14391e-10	0.241459	0.081	0.006	7.84692e-06
EIF2S2	2.19454e-10	0.188402	0.202	0.045	8.03222e-06
ZNF699	2.28097e-10	0.163017	0.081	0.006	8.34858e-06
ZBTB11	2.29606e-10	0.386054	0.202	0.046	8.40382e-06
PPIB	2.30898e-10	0.19454	0.177	0.036	8.45109e-06
TBC1D12	2.31143e-10	0.45238	0.282	0.085	8.46007e-06
RIC1	2.41378e-10	0.448627	0.395	0.146	8.83466e-06
SMC5	2.43379e-10	0.531869	0.452	0.183	8.90791e-06
RPS15	2.45136e-10	0.520978	0.387	0.138	8.97223e-06
SLC1A3	2.46419e-10	-1.30871	0.153	0.418	9.01919e-06
UAP1	2.48009e-10	0.539381	0.202	0.048	9.07739e-06
RPL7A	2.54417e-10	0.411552	0.323	0.103	9.3119e-06
FNBP1	2.56696e-10	0.574305	0.427	0.168	9.39532e-06
NFIA	2.60269e-10	0.681102	0.935	0.786	9.52609e-06
TRIO	2.61142e-10	0.756536	0.847	0.576	9.55805e-06
RPS25	2.64151e-10	0.293681	0.282	0.081	9.66819e-06
BUB3	2.68062e-10	0.27277	0.169	0.034	9.81134e-06
SF3B1	2.69443e-10	0.438145	0.371	0.131	9.86189e-06
RABAC1	2.70458e-10	0.179508	0.145	0.024	9.89902e-06
LMCD1	2.72314e-10	0.94866	0.379	0.146	9.96698e-06
RELB	2.76261e-10	0.337096	0.137	0.022	1.01114e-05
ITGB1BP1	2.83068e-10	0.454576	0.194	0.044	1.03606e-05
NUP50	2.83768e-10	0.246609	0.137	0.022	1.03862e-05
CCNC	2.96524e-10	0.322798	0.21	0.051	1.08531e-05
KLF3	2.97286e-10	0.281429	0.226	0.057	1.0881e-05
BZW1	2.97685e-10	0.181439	0.185	0.039	1.08956e-05
STK3	2.97746e-10	0.688497	0.694	0.368	1.08978e-05
CYTOR	3.05319e-10	0.601735	0.226	0.058	1.1175e-05
TLR4	3.10921e-10	0.348484	0.129	0.02	1.138e-05
PPM1L	3.13605e-10	-1.10658	0.347	0.585	1.14783e-05
RANBP17	3.13846e-10	0.864915	0.339	0.123	1.14871e-05
FYB2	3.16809e-10	-1.35323	0.145	0.414	1.15955e-05
PRDM16	3.19395e-10	-1.10547	0.331	0.565	1.16902e-05
HBS1L	3.2753e-10	0.437998	0.25	0.07	1.19879e-05
EHBP1	3.28147e-10	0.777686	0.556	0.27	1.20105e-05
RBBP8	3.30008e-10	0.273751	0.153	0.028	1.20786e-05
NEDD1	3.3006e-10	0.434483	0.145	0.025	1.20805e-05
PPP4C	3.30952e-10	0.201335	0.137	0.022	1.21132e-05
TMBIM4	3.31726e-10	0.417116	0.323	0.104	1.21415e-05
GABBR1	3.33333e-10	0.189059	0.218	0.052	1.22003e-05
SRSF3	3.34392e-10	0.526086	0.468	0.187	1.22391e-05
ENPP1	3.44471e-10	0.33657	0.153	0.028	1.2608e-05
SYNJ2BP	3.44946e-10	0.314065	0.177	0.037	1.26254e-05
PRKG1	3.45579e-10	0.583268	0.492	0.924	1.26485e-05
LINC01428	3.49294e-10	-1.37656	0.21	0.46	1.27845e-05
MBD5	3.51026e-10	0.796706	0.798	0.552	1.28479e-05
AC079142.1	3.57769e-10	-1.27979	0.226	0.489	1.30947e-05
RIMS1	3.60076e-10	1.3502	0.185	0.044	1.31792e-05
ERCC6L2	3.62289e-10	0.609874	0.427	0.173	1.32601e-05
MAP4K4	3.64238e-10	0.72532	0.718	0.406	1.33315e-05
GPM6A	3.65684e-10	-1.29272	0.081	0.358	1.33844e-05
KHDRBS1	3.65762e-10	0.458429	0.419	0.16	1.33873e-05
CCNT1	3.6919e-10	0.289691	0.226	0.058	1.35127e-05
RUNX1T1	3.74822e-10	0.835417	0.694	0.426	1.37189e-05
CRISPLD2	3.80464e-10	1.36159	0.185	0.043	1.39254e-05
PLD1	3.82774e-10	-1.08689	0.355	0.578	1.40099e-05
PEAR1	3.83056e-10	0.297099	0.129	0.02	1.40202e-05
ZNF790	3.83056e-10	0.23297	0.129	0.02	1.40202e-05
DDX5	3.93552e-10	0.678621	0.71	0.387	1.44044e-05
KIAA1217	3.94379e-10	1.11124	0.823	0.716	1.44347e-05
PRIM2	3.9544e-10	0.556305	0.258	0.075	1.44735e-05
RPP30	4.02107e-10	0.246871	0.129	0.02	1.47175e-05
UBE2J1	4.03294e-10	0.340995	0.202	0.048	1.4761e-05
TET2	4.06425e-10	0.589664	0.46	0.192	1.48756e-05
RPS6KA3	4.08709e-10	0.784868	0.484	0.227	1.49592e-05
BAALC	4.09036e-10	0.624159	0.113	0.015	1.49711e-05
TBC1D5	4.11173e-10	0.81178	0.831	0.571	1.50494e-05
MBNL1	4.17134e-10	0.749269	0.879	0.659	1.52675e-05
SCLT1	4.23583e-10	0.840685	0.452	0.2	1.55036e-05
GOSR2	4.26211e-10	0.303616	0.185	0.041	1.55998e-05
ARHGEF1	4.2789e-10	0.229011	0.161	0.031	1.56612e-05
LINC02649	4.31278e-10	0.290258	0.089	0.008	1.57852e-05
HGF	4.35305e-10	0.241877	0.089	0.008	1.59326e-05
LRRK1	4.40124e-10	0.425865	0.121	0.017	1.6109e-05
RPLP2	4.41744e-10	0.66295	0.363	0.134	1.61683e-05
CCNG2	4.46543e-10	0.403446	0.121	0.017	1.63439e-05
GPIHBP1	4.52306e-10	0.223732	0.129	0.02	1.65548e-05
NFYA	4.52846e-10	0.403116	0.161	0.032	1.65746e-05
AC108734.4	4.55114e-10	0.568973	0.113	0.015	1.66576e-05
TMEM150C	4.56237e-10	0.488168	0.202	0.049	1.66987e-05
MFSD8	4.63796e-10	0.271491	0.185	0.041	1.69754e-05
MT-CO2	4.65236e-10	-0.505314	0.887	0.997	1.70281e-05
ATXN7	4.65285e-10	0.527922	0.403	0.156	1.70299e-05
CKLF	4.73242e-10	0.182624	0.089	0.008	1.73211e-05
SLC25A36	4.76574e-10	-1.20289	0.258	0.491	1.74431e-05
SLC25A5	4.77651e-10	0.13453	0.089	0.008	1.74825e-05
MPRIP	4.77743e-10	0.602879	0.565	0.265	1.74859e-05
BTN2A1	4.79173e-10	0.284875	0.145	0.025	1.75382e-05
DENND11	4.80416e-10	0.441163	0.194	0.045	1.75837e-05
CKM	4.80439e-10	-1.30639	0.202	0.453	1.75846e-05
PHKB	4.82929e-10	0.782279	0.605	0.315	1.76757e-05
HIP1	4.835e-10	0.821686	0.653	0.342	1.76966e-05
CDK11B	4.84638e-10	0.187669	0.129	0.02	1.77383e-05
JAK1	4.84667e-10	0.655075	0.661	0.35	1.77393e-05
TMBIM6	4.98391e-10	0.36262	0.347	0.117	1.82416e-05
TNKS1BP1	5.01294e-10	0.254457	0.121	0.017	1.83479e-05
BBIP1	5.02499e-10	0.355954	0.177	0.038	1.8392e-05
CEP120	5.04534e-10	0.317751	0.21	0.051	1.84664e-05
ANKRD13D	5.13993e-10	0.290895	0.113	0.015	1.88127e-05
SEPTIN10	5.1617e-10	0.526664	0.266	0.081	1.88923e-05
AC007681.1	5.16649e-10	0.287388	0.097	0.01	1.89099e-05
EMSY	5.17461e-10	0.579074	0.371	0.138	1.89396e-05
TNKS2	5.28487e-10	0.460207	0.355	0.125	1.93431e-05
PCDH19	5.30119e-10	0.497381	0.097	0.01	1.94029e-05
ANKRD36C	5.30294e-10	0.627378	0.347	0.126	1.94093e-05
NR2C2	5.33044e-10	0.581349	0.355	0.129	1.95099e-05
FAM171A1	5.36748e-10	0.459014	0.202	0.049	1.96455e-05
SP4	5.41528e-10	0.454671	0.242	0.067	1.98205e-05
ZMYM2	5.44232e-10	0.584615	0.589	0.291	1.99194e-05
[truncated: 7,780 more rows]
